# Supplementary material for: SPARK regulates AGC kinases central to the Toxoplasma gondii asexual cycle
Source: bioRxiv preprint, doi:10.1101/2023.10.30.564746, version 2 (2024-05-02)
Supplement: Supplementary File 1 [file 564746_file03.xlsx]

## Sheet: 1.1_SPARK_mNG_IPs
Protein_ID	Description	Exp.q.value.Combined	Contaminant	Sum.PEP.Score	Coverage.in.Percent	Number.of.Peptides	Number.of.PSMs	Number.of.Unique.Peptides	Number.of.AAs	MW.in.kDa	calc.pI	Score.Sequest.HT.Sequest.HT	Number.of.Peptides.by.Search.Engine.Sequest.HT	Abundance.Ratio.SPARK_mNG..dku80	Abundance.Ratio.log2.SPARK_mNG..dku80	Abundance.Ratio.Adj.P.Value.SPARK_mNG..dku80	Abundances.Grouped.dku80	Abundances.Grouped.SPARK_mNG	Abundances.Grouped.CV.in.Percent.dku80	Abundances.Grouped.CV.in.Percent.SPARK_mNG	Abundances.Normalized.F5.Sample.dku80.R2	Abundances.Normalized.F6.Sample.dku80.R1	Abundances.Normalized.F7.Sample.SPARK_mNG.R2	Abundances.Normalized.F8.Sample.SPARK_mNG.R1	Abundance.F5.Sample.dku80.R2	Abundance.F6.Sample.dku80.R1	Abundance.F7.Sample.SPARK_mNG.R2	Abundance.F8.Sample.SPARK_mNG.R1	Found.in.Sample.in.S5.F5.Sample.dku80.R2	Found.in.Sample.in.S6.F6.Sample.dku80.R1	Found.in.Sample.in.S7.F7.Sample.SPARK_mNG.R2	Found.in.Sample.in.S8.F8.Sample.SPARK_mNG.R1	Number.of.Protein.Groups	Modifications
TGGT1_202630	transcript=TGGT1_202630-t26_1 | gene=TGGT1_202630 | organism=Toxoplasma_gondii_GT1 | gene_product=AAA domain-containing protein [Source:UniProtKB/TrEMBL;Acc:S7WAJ3] | transcript_product=ATP-dependent metallopeptidase HflB subfamily protein | location=TGGT1_chrVIIa:3049109-3060691(-) | protein_length=1188 | sequence_SO=chromosome | SO=protein_coding_gene | is_pseudo=false	0.003	FALSE	2.825	1	1	1	1	1188	128.3	8.85	0	1	NA	NA	NA	NA	NA	NA	NA	NA	NA	NA	NA	NA	NA	NA	NA	Not Found	Not Found	High	Not Found	1
TGGT1_214260	transcript=TGGT1_214260-t26_1 | gene=TGGT1_214260 | organism=Toxoplasma_gondii_GT1 | gene_product=PPDK_N domain-containing protein [Source:UniProtKB/TrEMBL;Acc:S7UQ91] | transcript_product=putative alpha-glucan water dikinase 1 | location=TGGT1_chrX:6069350-6083963(+) | protein_length=1715 | sequence_SO=chromosome | SO=protein_coding_gene | is_pseudo=false	0.013	FALSE	2.073	1	1	1	1	1715	191.4	6.13	0	1	NA	NA	NA	NA	NA	NA	NA	NA	NA	NA	NA	NA	NA	NA	NA	Not Found	Not Found	Not Found	High	1
TGGT1_216120	transcript=TGGT1_216120-t26_1 | gene=TGGT1_216120 | organism=Toxoplasma_gondii_GT1 | gene_product=hypothetical protein | transcript_product=hypothetical protein | location=TGGT1_chrXI:6313282-6318525(-) | protein_length=834 | sequence_SO=chromosome | SO=protein_coding_gene | is_pseudo=false	0.013	FALSE	2.022	3	1	1	1	834	90.3	7.12	0	1	NA	NA	NA	NA	NA	NA	NA	NA	NA	NA	NA	NA	NA	NA	NA	Not Found	Not Found	Not Found	High	1
TGGT1_221690	transcript=TGGT1_221690-t26_1 | gene=TGGT1_221690 | organism=Toxoplasma_gondii_GT1 | gene_product=hypothetical protein | transcript_product=hypothetical protein | location=TGGT1_chrII:554124-559020(-) | protein_length=1410 | sequence_SO=chromosome | SO=protein_coding_gene | is_pseudo=false	0.019	FALSE	1.908	2	1	1	1	1410	149.6	5.3	0	1	NA	NA	NA	NA	NA	NA	NA	NA	NA	NA	NA	NA	NA	NA	NA	Not Found	High	Not Found	Not Found	1
TGGT1_221900	transcript=TGGT1_221900-t26_1 | gene=TGGT1_221900 | organism=Toxoplasma_gondii_GT1 | gene_product=hypothetical protein | transcript_product=hypothetical protein | location=TGGT1_chrII:660546-665427(+) | protein_length=222 | sequence_SO=chromosome | SO=protein_coding_gene | is_pseudo=false	0.013	FALSE	2.027	8	1	1	1	222	25	9.64	0	1	NA	NA	NA	NA	NA	NA	NA	NA	NA	NA	NA	NA	NA	NA	NA	High	Not Found	Not Found	Not Found	1
TGGT1_221950	transcript=TGGT1_221950-t26_1 | gene=TGGT1_221950 | organism=Toxoplasma_gondii_GT1 | gene_product=Matrin-type domain-containing protein [Source:UniProtKB/TrEMBL;Acc:S7ULB8] | transcript_product=putative splicesome-associated protein | location=TGGT1_chrII:703092-709611(-) | protein_length=559 | sequence_SO=chromosome | SO=protein_coding_gene | is_pseudo=false	0.03	FALSE	1.741	1	1	1	1	559	65	5.57	0	1	NA	NA	NA	NA	NA	NA	NA	NA	NA	NA	NA	NA	NA	NA	NA	Not Found	Not Found	Not Found	High	1
TGGT1_223790	transcript=TGGT1_223790-t26_1 | gene=TGGT1_223790 | organism=Toxoplasma_gondii_GT1 | gene_product=hypothetical protein | transcript_product=hypothetical protein | location=TGGT1_chrX:3478527-3485384(+) | protein_length=1003 | sequence_SO=chromosome | SO=protein_coding_gene | is_pseudo=false	0.03	FALSE	1.786	1	1	1	1	1003	110.1	7.09	1.63	1	NA	NA	NA	NA	NA	NA	NA	NA	NA	NA	NA	NA	NA	NA	NA	Not Found	Not Found	Not Found	High	1
TGGT1_227850	transcript=TGGT1_227850-t26_1 | gene=TGGT1_227850 | organism=Toxoplasma_gondii_GT1 | gene_product=Peptidyl-prolyl cis-trans isomerase [Source:UniProtKB/TrEMBL;Acc:S7UXC3] | transcript_product=peptidyl-prolyl cis-trans isomerase, cyclophilin-type domain-containing protein | location=TGGT1_chrX:681324-685057(-) | protein_length=592 | sequence_SO=chromosome | SO=protein_coding_gene | is_pseudo=false	0.013	FALSE	2.107	3	1	1	1	592	66.2	8.18	0	1	NA	NA	NA	NA	NA	NA	NA	NA	NA	NA	NA	NA	NA	NA	NA	Not Found	High	Not Found	Not Found	1
TGGT1_231100	transcript=TGGT1_231100-t26_1 | gene=TGGT1_231100 | organism=Toxoplasma_gondii_GT1 | gene_product=hypothetical protein | transcript_product=hypothetical protein | location=TGGT1_chrVIII:1232359-1236169(+) | protein_length=492 | sequence_SO=chromosome | SO=protein_coding_gene | is_pseudo=false	0.027	FALSE	1.807	2	1	1	1	492	53.8	6.48	0	1	NA	NA	NA	NA	NA	NA	NA	NA	NA	NA	NA	NA	NA	NA	NA	Not Found	Not Found	Not Found	High	1
TGGT1_237150	transcript=TGGT1_237150-t26_1 | gene=TGGT1_237150 | organism=Toxoplasma_gondii_GT1 | gene_product=Putative minor histocompatibility antigen h13 [Source:UniProtKB/TrEMBL;Acc:S7UR45] | transcript_product=putative minor histocompatibility antigen h13 | location=TGGT1_chrX:5632583-5637249(-) | protein_length=417 | sequence_SO=chromosome | SO=protein_coding_gene | is_pseudo=false	0.013	FALSE	2.106	3	1	1	1	417	46.2	6.47	0	1	NA	NA	NA	NA	NA	NA	NA	NA	NA	NA	NA	NA	NA	NA	NA	Not Found	Not Found	Not Found	High	1
TGGT1_238950	transcript=TGGT1_238950-t26_1 | gene=TGGT1_238950 | organism=Toxoplasma_gondii_GT1 | gene_product=FA_desaturase domain-containing protein [Source:UniProtKB/TrEMBL;Acc:S7VZX5] | transcript_product=putative fatty acyl-CoA desaturase | location=TGGT1_chrVI:327886-337165(-) | protein_length=1042 | sequence_SO=chromosome | SO=protein_coding_gene | is_pseudo=false	0.003	FALSE	2.877	1	1	1	1	1042	117.1	8.7	1.63	1	NA	NA	NA	NA	NA	NA	NA	NA	NA	NA	NA	NA	NA	NA	NA	Not Found	Not Found	Not Found	High	1
TGGT1_240510	transcript=TGGT1_240510-t26_1 | gene=TGGT1_240510 | organism=Toxoplasma_gondii_GT1 | gene_product=hypothetical protein | transcript_product=hypothetical protein | location=TGGT1_chrVI:1270405-1274121(-) | protein_length=1238 | sequence_SO=chromosome | SO=protein_coding_gene | is_pseudo=false	0.004	FALSE	2.656	1	1	1	1	1238	134.8	8.73	0	1	NA	NA	NA	NA	NA	NA	NA	NA	NA	NA	NA	NA	NA	NA	NA	Not Found	Not Found	Not Found	High	1
TGGT1_250730	transcript=TGGT1_250730-t26_1 | gene=TGGT1_250730 | organism=Toxoplasma_gondii_GT1 | gene_product=Putative 60S ribosomal protein L7-B [Source:UniProtKB/TrEMBL;Acc:S7V062] | transcript_product=putative 60S ribosomal protein L7-B | location=TGGT1_chrXII:5080605-5084376(+) | protein_length=267 | sequence_SO=chromosome | SO=protein_coding_gene | is_pseudo=false	0.004	FALSE	2.692	4	1	2	1	267	30.8	10.29	2.09	1	NA	NA	NA	NA	NA	NA	NA	NA	NA	NA	NA	NA	NA	NA	NA	Not Found	Not Found	High	High	1
TGGT1_275370	transcript=TGGT1_275370-t26_1 | gene=TGGT1_275370 | organism=Toxoplasma_gondii_GT1 | gene_product=SAG-related sequence SRS47C [Source:UniProtKB/TrEMBL;Acc:S7UQN6] | transcript_product=SAG-related sequence SRS47C | location=TGGT1_chrX:7094944-7096601(-) | protein_length=357 | sequence_SO=chromosome | SO=protein_coding_gene | is_pseudo=false	0.013	FALSE	2.003	3	1	1	1	357	38.5	5.24	0	1	NA	NA	NA	NA	NA	NA	NA	NA	NA	NA	NA	NA	NA	NA	NA	Not Found	Not Found	Not Found	High	1
TGGT1_289550	transcript=TGGT1_289550-t26_1 | gene=TGGT1_289550 | organism=Toxoplasma_gondii_GT1 | gene_product=WD_REPEATS_REGION domain-containing protein [Source:UniProtKB/TrEMBL;Acc:A0A125YPU8] | transcript_product=WD domain, G-beta repeat-containing protein | location=TGGT1_chrIX:3105816-3110675(-) | protein_length=530 | sequence_SO=chromosome | SO=protein_coding_gene | is_pseudo=false	0.013	FALSE	2.124	2	1	1	1	530	57.3	4.91	1.73	1	NA	NA	NA	NA	NA	NA	NA	NA	NA	NA	NA	NA	NA	NA	NA	Not Found	Not Found	Not Found	High	1
TGGT1_312050	transcript=TGGT1_312050-t26_1 | gene=TGGT1_312050 | organism=Toxoplasma_gondii_GT1 | gene_product=Putative small GTPase Rab2 [Source:UniProtKB/TrEMBL;Acc:A0A125YL13] | transcript_product=putative small GTPase Rab2 | location=TGGT1_chrXI:2359586-2364079(+) | protein_length=214 | sequence_SO=chromosome | SO=protein_coding_gene | is_pseudo=false	0.005	FALSE	2.575	5	1	4	1	214	24.2	8.44	4.92	1	NA	NA	NA	NA	NA	NA	NA	NA	NA	NA	NA	NA	NA	NA	NA	Not Found	Not Found	High	High	1
TGGT1_320020	transcript=TGGT1_320020-t26_1 | gene=TGGT1_320020 | organism=Toxoplasma_gondii_GT1 | gene_product=Transporter, major facilitator family protein [Source:UniProtKB/TrEMBL;Acc:S7UJG3] | transcript_product=transporter, major facilitator family protein | location=TGGT1_chrIV:518139-519905(-) | protein_length=588 | sequence_SO=chromosome | SO=protein_coding_gene | is_pseudo=false	0.01	FALSE	2.381	2	1	2	1	588	62.9	5.12	3.6	1	NA	NA	NA	NA	NA	NA	NA	NA	NA	NA	NA	NA	NA	NA	NA	High	Not Found	Not Found	High	1
TGGT1_201380	transcript=TGGT1_201380-t26_1 | gene=TGGT1_201380 | organism=Toxoplasma_gondii_GT1 | gene_product=Putative chorismate synthase [Source:UniProtKB/TrEMBL;Acc:S7W471] | transcript_product=putative chorismate synthase | location=TGGT1_chrVIIa:3812592-3817565(+) | protein_length=536 | sequence_SO=chromosome | SO=protein_coding_gene | is_pseudo=false	0.032	FALSE	1.687	2	1	1	1	536	58.1	7.78	0	1	100	6.64	3.4931e-16	NA	64100.3	NA	NA	NA	NA	NA	64100.3	NA	NA	NA	64100.3	Not Found	Not Found	Not Found	High	1
TGGT1_204360	transcript=TGGT1_204360-t26_1 | gene=TGGT1_204360 | organism=Toxoplasma_gondii_GT1 | gene_product=Peptidase_S8 domain-containing protein [Source:UniProtKB/TrEMBL;Acc:S7UU74] | transcript_product=subtilisin SUB4 | location=TGGT1_chrVIIa:1751612-1758824(+) | protein_length=1242 | sequence_SO=chromosome | SO=protein_coding_gene | is_pseudo=false	0.033	FALSE	1.617	2	1	1	1	1242	134.3	5.27	0	1	100	6.64	3.4931e-16	NA	69898.8	NA	NA	NA	NA	NA	69898.8	NA	NA	NA	69898.8	Not Found	Not Found	Not Found	High	1	Phospho [S1113]
TGGT1_205320	transcript=TGGT1_205320-t26_1 | gene=TGGT1_205320 | organism=Toxoplasma_gondii_GT1 | gene_product=hypothetical protein | transcript_product=hypothetical protein | location=TGGT1_chrVIIa:1385667-1389087(+) | protein_length=739 | sequence_SO=chromosome | SO=protein_coding_gene | is_pseudo=false	0.028	FALSE	1.814	10	1	1	1	739	80	5.48	0	1	100	6.64	3.4931e-16	NA	252601	NA	NA	NA	NA	NA	252601	NA	NA	NA	252601	Not Found	Not Found	Not Found	High	1
TGGT1_212990	transcript=TGGT1_212990-t26_1 | gene=TGGT1_212990 | organism=Toxoplasma_gondii_GT1 | gene_product=hypothetical protein | transcript_product=hypothetical protein | location=TGGT1_chrV:626448-635544(+) | protein_length=1064 | sequence_SO=chromosome | SO=protein_coding_gene | is_pseudo=false	0.02	FALSE	1.898	3	1	1	1	1064	113.6	8.4	0	1	100	6.64	3.4931e-16	NA	2936.22	NA	NA	NA	NA	NA	2936.22	NA	NA	NA	2936.22	Not Found	Not Found	Not Found	High	1	Phospho [T939; T941]
TGGT1_214320	transcript=TGGT1_214320-t26_1 | gene=TGGT1_214320 | organism=Toxoplasma_gondii_GT1 | gene_product=MFS domain-containing protein [Source:UniProtKB/TrEMBL;Acc:A0A125YKB0] | transcript_product=facilitative glucose transporter GT1 | location=TGGT1_chrX:6138702-6140408(+) | protein_length=568 | sequence_SO=chromosome | SO=protein_coding_gene | is_pseudo=false	0.003	FALSE	2.843	2	1	1	1	568	61.6	6.93	0	1	100	6.64	3.4931e-16	NA	208265	NA	22.74	NA	NA	177076	244949	NA	NA	66979.3	244949	Not Found	Not Found	Peak Found	High	1
TGGT1_218960	transcript=TGGT1_218960-t26_1 | gene=TGGT1_218960 | organism=Toxoplasma_gondii_GT1 | gene_product=AP2 domain transcription factor AP2XII-1 [Source:UniProtKB/TrEMBL;Acc:A0A125YNZ7] | transcript_product=AP2 domain transcription factor AP2XII-1 | location=TGGT1_chrXII:1115397-1126277(-) | protein_length=2283 | sequence_SO=chromosome | SO=protein_coding_gene | is_pseudo=false	0.031	FALSE	1.713	1	1	1	1	2283	247.7	5.91	0	1	100	6.64	3.4931e-16	NA	310665	NA	4	NA	NA	302008	319570	NA	NA	114235	319570	Not Found	Not Found	Peak Found	High	1
TGGT1_226030	transcript=TGGT1_226030-t26_1 | gene=TGGT1_226030 | organism=Toxoplasma_gondii_GT1 | gene_product=AGC kinase [Source:UniProtKB/TrEMBL;Acc:A0A125YVN2] | transcript_product=AGC kinase | location=TGGT1_chrX:1762934-1764677(+) | protein_length=343 | sequence_SO=chromosome | SO=protein_coding_gene | is_pseudo=false	0.035	FALSE	1.547	2	1	1	1	343	39.4	9.17	0	1	100	6.64	3.4931e-16	NA	241341	NA	7.76	NA	NA	254967	228443	NA	NA	96442.1	228443	Not Found	Not Found	Peak Found	High	1
TGGT1_227560	transcript=TGGT1_227560-t26_1 | gene=TGGT1_227560 | organism=Toxoplasma_gondii_GT1 | gene_product=TFIIS N-terminal domain-containing protein [Source:UniProtKB/TrEMBL;Acc:S7W5Z1] | transcript_product=putative IWS1 transcription factor | location=TGGT1_chrX:825559-830619(+) | protein_length=476 | sequence_SO=chromosome | SO=protein_coding_gene | is_pseudo=false	0.003	FALSE	2.883	3	1	1	1	476	54.3	5.92	0	1	100	6.64	3.4931e-16	NA	59197.2	NA	8.57	NA	NA	62898.5	55713.7	NA	NA	23791.5	55713.7	Not Found	Not Found	Peak Found	High	1
TGGT1_230180	transcript=TGGT1_230180-t26_1 | gene=TGGT1_230180 | organism=Toxoplasma_gondii_GT1 | gene_product=hypothetical protein | transcript_product=hypothetical protein | location=TGGT1_chrVIII:662231-666509(-) | protein_length=542 | sequence_SO=chromosome | SO=protein_coding_gene | is_pseudo=false	0.02	FALSE	1.88	3	1	1	1	542	57.3	10.14	0	1	100	6.64	3.4931e-16	NA	122397	NA	1.5	NA	NA	121110	123698	NA	NA	45810.1	123698	Not Found	Not Found	Peak Found	High	1
TGGT1_232000	transcript=TGGT1_232000-t26_1 | gene=TGGT1_232000 | organism=Toxoplasma_gondii_GT1 | gene_product=hypothetical protein | transcript_product=hypothetical protein | location=TGGT1_chrVIII:1738722-1741055(+) | protein_length=637 | sequence_SO=chromosome | SO=protein_coding_gene | is_pseudo=false	0.027	FALSE	1.809	3	1	1	1	637	69.4	9	0	1	100	6.64	3.4931e-16	NA	69755.8	NA	26.98	NA	NA	84615.1	57505.9	NA	NA	32005.9	57505.9	Not Found	Not Found	Peak Found	High	1	Methylthio [C528; C536]
TGGT1_236890	transcript=TGGT1_236890-t26_1 | gene=TGGT1_236890 | organism=Toxoplasma_gondii_GT1 | gene_product=hypothetical protein | transcript_product=hypothetical protein | location=TGGT1_chrX:5457347-5458367(-) | protein_length=218 | sequence_SO=chromosome | SO=protein_coding_gene | is_pseudo=false	0.012	FALSE	2.263	5	1	1	1	218	24.6	6.57	0	1	100	6.64	3.4931e-16	NA	315720	NA	NA	NA	NA	NA	315720	NA	NA	NA	315720	Not Found	Not Found	Not Found	High	1
TGGT1_244910	transcript=TGGT1_244910-t26_1 | gene=TGGT1_244910 | organism=Toxoplasma_gondii_GT1 | gene_product=SP-RING-type domain-containing protein [Source:UniProtKB/TrEMBL;Acc:S7W0U0] | transcript_product=MIZ/SP-RING zinc finger domain-containing protein | location=TGGT1_chrVI:3506319-3513206(-) | protein_length=1304 | sequence_SO=chromosome | SO=protein_coding_gene | is_pseudo=false	0.045	FALSE	1.426	1	1	1	1	1304	145	7.55	0	1	100	6.64	3.4931e-16	NA	252428	NA	3.84	NA	NA	259384	245659	NA	NA	98112.8	245659	Not Found	Not Found	Peak Found	High	1
TGGT1_252390	transcript=TGGT1_252390-t26_1 | gene=TGGT1_252390 | organism=Toxoplasma_gondii_GT1 | gene_product=hypothetical protein | transcript_product=hypothetical protein | location=TGGT1_chrIII:522844-523705(-) | protein_length=103 | sequence_SO=chromosome | SO=protein_coding_gene | is_pseudo=false	0.036	FALSE	1.539	9	1	1	1	103	11.3	9.01	0	1	100	6.64	3.4931e-16	NA	422302	NA	8.88	NA	NA	396581	449691	NA	NA	150008	449691	Not Found	Not Found	High	Peak Found	1
TGGT1_262400	transcript=TGGT1_262400-t26_1 | gene=TGGT1_262400 | organism=Toxoplasma_gondii_GT1 | gene_product=Lipase_3 domain-containing protein [Source:UniProtKB/TrEMBL;Acc:S7WDX0] | transcript_product=lipase | location=TGGT1_chrVIIb:1267118-1275076(-) | protein_length=1409 | sequence_SO=chromosome | SO=protein_coding_gene | is_pseudo=false	0.013	FALSE	2.084	1	1	1	1	1409	155.7	8.54	0	1	100	6.64	3.4931e-16	NA	35342.2	NA	4.16	NA	NA	36398.8	34316.3	NA	NA	13767.9	34316.3	Not Found	Not Found	Peak Found	High	1
TGGT1_264130	transcript=TGGT1_264130-t26_1 | gene=TGGT1_264130 | organism=Toxoplasma_gondii_GT1 | gene_product=hypothetical protein | transcript_product=hypothetical protein | location=TGGT1_chrVIIb:133422-137648(-) | protein_length=673 | sequence_SO=chromosome | SO=protein_coding_gene | is_pseudo=false	0.028	FALSE	1.798	1	1	1	1	673	75.1	9.42	0	1	100	6.64	3.4931e-16	NA	123171	NA	12.64	NA	NA	134719	112613	NA	NA	50957.9	112613	Not Found	Not Found	Peak Found	High	1
TGGT1_267620	transcript=TGGT1_267620-t26_1 | gene=TGGT1_267620 | organism=Toxoplasma_gondii_GT1 | gene_product=Multi-pass transmembrane protein [Source:UniProtKB/TrEMBL;Acc:S7UGQ1] | transcript_product=multi-pass transmembrane protein | location=TGGT1_chrIX:346132-354477(+) | protein_length=508 | sequence_SO=chromosome | SO=protein_coding_gene | is_pseudo=false	0.02	FALSE	1.883	2	1	1	1	508	57.6	5.69	0	1	100	6.64	3.4931e-16	NA	60990.2	NA	53.17	NA	NA	41072.3	90567.3	NA	NA	15535.7	90567.3	Not Found	Not Found	Peak Found	High	1
TGGT1_267740	transcript=TGGT1_267740-t26_1 | gene=TGGT1_267740 | organism=Toxoplasma_gondii_GT1 | gene_product=hypothetical protein | transcript_product=hypothetical protein | location=TGGT1_chrIX:229747-230769(+) | protein_length=340 | sequence_SO=chromosome | SO=protein_coding_gene | is_pseudo=false	0.003	FALSE	3.51	8	1	1	1	340	37	9.36	0	1	100	6.64	3.4931e-16	NA	93161.4	NA	NA	NA	NA	NA	93161.4	NA	NA	NA	93161.4	Not Found	Not Found	Not Found	High	1
TGGT1_268210	transcript=TGGT1_268210-t26_1 | gene=TGGT1_268210 | organism=Toxoplasma_gondii_GT1 | gene_product=Protein kinase domain-containing protein [Source:UniProtKB/TrEMBL;Acc:S7V4V0] | transcript_product=AGC kinase | location=TGGT1_chrVIII:6636910-6641684(-) | protein_length=515 | sequence_SO=chromosome | SO=protein_coding_gene | is_pseudo=false	0	FALSE	56.226	42	17	37	17	515	57.8	5.85	60.59	17	100	6.64	3.4931e-16	NA	3.55875e+07	NA	1.57	NA	NA	3.59848e+07	3.51945e+07	NA	NA	1.36114e+07	3.51945e+07	Not Found	Not Found	High	High	1	Methylthio [C48; C149; C304; C346]; Phospho [S385]
TGGT1_286470	transcript=TGGT1_286470-t26_1 | gene=TGGT1_286470 | organism=Toxoplasma_gondii_GT1 | gene_product=AGC kinase [Source:UniProtKB/TrEMBL;Acc:A0A125YPZ9] | transcript_product=AGC kinase | location=TGGT1_chrV:1674675-1676358(+) | protein_length=514 | sequence_SO=chromosome | SO=protein_coding_gene | is_pseudo=false	0.003	FALSE	3.016	2	1	1	1	514	57.2	9.31	0	1	100	6.64	3.4931e-16	NA	105770	NA	0.29	NA	NA	105989	105551	NA	NA	40090.5	105551	Not Found	Not Found	Peak Found	High	1
TGGT1_288840	transcript=TGGT1_288840-t26_1 | gene=TGGT1_288840 | organism=Toxoplasma_gondii_GT1 | gene_product=hypothetical protein | transcript_product=hypothetical protein | location=TGGT1_chrIX:2574137-2576083(+) | protein_length=648 | sequence_SO=chromosome | SO=protein_coding_gene | is_pseudo=false	0.033	FALSE	1.585	1	1	1	1	648	70.8	9.13	1.83	1	100	6.64	3.4931e-16	NA	359843	NA	5.8	NA	NA	345385	374907	NA	NA	130643	374907	Not Found	Not Found	Peak Found	High	1
TGGT1_289690	transcript=TGGT1_289690-t26_1 | gene=TGGT1_289690 | organism=Toxoplasma_gondii_GT1 | gene_product=Glyceraldehyde-3-phosphate dehydrogenase [Source:UniProtKB/TrEMBL;Acc:S7UQ54] | transcript_product=glyceraldehyde-3-phosphate dehydrogenase GAPDH1 | location=TGGT1_chrIX:3189155-3191218(-) | protein_length=489 | sequence_SO=chromosome | SO=protein_coding_gene | is_pseudo=false	0	FALSE	4.389	4	2	3	1	489	53.3	8.31	0	2	100	6.64	3.4931e-16	NA	151472	NA	1.97	NA	NA	149379	153595	NA	NA	56502.9	153595	Not Found	Not Found	Peak Found	High	1	Methylthio [C398]
TGGT1_290270	transcript=TGGT1_290270-t26_1 | gene=TGGT1_290270 | organism=Toxoplasma_gondii_GT1 | gene_product=B30.2/SPRY domain-containing protein [Source:UniProtKB/TrEMBL;Acc:S7UP69] | transcript_product=SPRY domain-containing protein | location=TGGT1_chrIX:3481659-3486137(-) | protein_length=655 | sequence_SO=chromosome | SO=protein_coding_gene | is_pseudo=false	0.002	FALSE	3.872	6	2	2	2	655	71.4	8.62	0	2	100	6.64	3.4931e-16	NA	90475.1	NA	11.62	NA	NA	83323.3	98240.7	NA	NA	31517.2	98240.7	Not Found	Not Found	Peak Found	High	1
TGGT1_301130	transcript=TGGT1_301130-t26_1 | gene=TGGT1_301130 | organism=Toxoplasma_gondii_GT1 | gene_product=hypothetical protein | transcript_product=hypothetical protein | location=TGGT1_chrIV:2168473-2169812(+) | protein_length=127 | sequence_SO=chromosome | SO=protein_coding_gene | is_pseudo=false	0.013	FALSE	2.22	20	1	1	1	127	13.5	5.85	0	1	100	6.64	3.4931e-16	NA	100408	NA	27.78	NA	NA	82286.3	122522	NA	NA	31125	122522	Not Found	Not Found	Peak Found	High	1
TGGT1_311480	transcript=TGGT1_311480-t26_1 | gene=TGGT1_311480 | organism=Toxoplasma_gondii_GT1 | gene_product=hypothetical protein | transcript_product=hypothetical protein | location=TGGT1_chrXI:2071805-2077652(-) | protein_length=386 | sequence_SO=chromosome | SO=protein_coding_gene | is_pseudo=false	0.003	FALSE	3.1	5	1	1	1	386	42.4	5.02	0	1	100	6.64	3.4931e-16	NA	39627.9	NA	74.53	NA	NA	22054.5	71203.9	NA	NA	8342.19	71203.9	Not Found	Not Found	Peak Found	High	1	Phospho [S312; S313]
TGGT1_312618	transcript=TGGT1_312618-t26_1 | gene=TGGT1_312618 | organism=Toxoplasma_gondii_GT1 | gene_product=hypothetical protein | transcript_product=hypothetical protein | location=TGGT1_chrXI:2785093-2789238(-) | protein_length=536 | sequence_SO=chromosome | SO=protein_coding_gene | is_pseudo=false	0.005	FALSE	2.584	4	1	1	1	536	59.3	5.49	0	1	100	6.64	3.4931e-16	NA	198975	NA	2.42	NA	NA	202411	195597	NA	NA	76562.7	195597	Not Found	Not Found	Peak Found	High	1
TGGT1_291010	transcript=TGGT1_291010-t26_1 | gene=TGGT1_291010 | organism=Toxoplasma_gondii_GT1 | gene_product=hypothetical protein | transcript_product=hypothetical protein | location=TGGT1_chrIX:3850359-3851009(-) | protein_length=216 | sequence_SO=chromosome | SO=protein_coding_gene | is_pseudo=false	0	FALSE	12.867	16	2	11	2	216	23.3	5.19	9.24	2	49.21	5.62	1.87443e-13	110223	5.42408e+06	NA	5.16	NA	110223	5.62574e+06	5.22966e+06	NA	12517	2.12795e+06	5.22966e+06	Not Found	Peak Found	High	High	1
TGGT1_205550	transcript=TGGT1_205550-t26_1 | gene=TGGT1_205550 | organism=Toxoplasma_gondii_GT1 | gene_product=Protein kinase domain-containing protein [Source:UniProtKB/TrEMBL;Acc:S7W9W1] | transcript_product=AGC kinase | location=TGGT1_chrVIIa:1252214-1256447(-) | protein_length=689 | sequence_SO=chromosome | SO=protein_coding_gene | is_pseudo=false	0	FALSE	8.824	6	4	6	4	689	74.8	7.55	0	4	13.584	3.76	7.68211e-06	58942.1	800687	13.43	12.19	64831	53588	872943	734412	11954	6085.52	330193	734412	Peak Found	Peak Found	High	High	1
TGGT1_227952	transcript=TGGT1_227952-t26_1 | gene=TGGT1_227952 | organism=Toxoplasma_gondii_GT1 | gene_product=14_3_3 domain-containing protein [Source:UniProtKB/TrEMBL;Acc:S7WD67] | transcript_product=14-3-3 superfamily protein | location=TGGT1_chrX:621123-624301(+) | protein_length=422 | sequence_SO=chromosome | SO=protein_coding_gene | is_pseudo=false	0	FALSE	8.897	11	4	6	4	422	48	9.45	5.2	4	7.375	2.88	0.00275536	217764	1.60603e+06	74.6	4.37	391536	121116	1.5572e+06	1.6564e+06	72194.1	13754.1	589014	1.6564e+06	Peak Found	Peak Found	High	High	1	Methylthio [C341]
TGGT1_306560	transcript=TGGT1_306560-t26_1 | gene=TGGT1_306560 | organism=Toxoplasma_gondii_GT1 | gene_product=hypothetical protein | transcript_product=hypothetical protein | location=TGGT1_chrIX:5962419-5967459(+) | protein_length=698 | sequence_SO=chromosome | SO=protein_coding_gene | is_pseudo=false	0	FALSE	7.781	5	2	5	2	698	67.2	8.95	0	2	6.975	2.8	0.00416114	110353	769659	26.98	10.08	133869	90968	826624	716620	24683.6	10330.4	312673	716620	Peak Found	Peak Found	High	High	1
TGGT1_236950	transcript=TGGT1_236950-t26_1 | gene=TGGT1_236950 | organism=Toxoplasma_gondii_GT1 | gene_product=hypothetical protein | transcript_product=hypothetical protein | location=TGGT1_chrX:5495249-5496238(-) | protein_length=112 | sequence_SO=chromosome | SO=protein_coding_gene | is_pseudo=false	0	FALSE	6.038	18	1	2	1	112	12.5	6.49	0	1	4.347	2.12	0.102977	168603	732874	64.51	56.17	275883	103040	481390	1.11574e+06	50869.2	11701.4	182087	1.11574e+06	Peak Found	Peak Found	Peak Found	High	1
TGGT1_273130	transcript=TGGT1_273130-t26_1 | gene=TGGT1_273130 | organism=Toxoplasma_gondii_GT1 | gene_product=SAG-related sequence SRS30A [Source:UniProtKB/TrEMBL;Acc:S7WJQ2] | transcript_product=SAG-related sequence SRS30A | location=TGGT1_chrVIII:3638958-3640118(-) | protein_length=362 | sequence_SO=chromosome | SO=protein_coding_gene | is_pseudo=false	0	FALSE	4.704	6	2	2	2	362	38.5	5.33	0	2	3.801	1.93	0.184093	92675.2	352290	25.86	2.88	77026.8	111503	359538	345187	14202.7	12662.4	135996	345187	Peak Found	Peak Found	Peak Found	High	1	Methylthio [C223]
TGGT1_276890	transcript=TGGT1_276890-t26_1 | gene=TGGT1_276890 | organism=Toxoplasma_gondii_GT1 | gene_product=hypothetical protein | transcript_product=hypothetical protein | location=TGGT1_chrXII:6781886-6789601(-) | protein_length=1174 | sequence_SO=chromosome | SO=protein_coding_gene | is_pseudo=false	0.002	FALSE	4.009	2	2	2	2	1174	129.4	7.24	0	2	3.502	1.81	0.256106	84682.4	296587	68.64	24.78	143861	49847.5	248457	354041	26526.1	5660.74	93979.6	354041	Peak Found	Peak Found	Peak Found	High	1
TGGT1_277850	transcript=TGGT1_277850-t26_1 | gene=TGGT1_277850 | organism=Toxoplasma_gondii_GT1 | gene_product=PDZ domain-containing protein [Source:UniProtKB/TrEMBL;Acc:S7W8J4] | transcript_product=trypsin domain-containing protein | location=TGGT1_chrXII:6389375-6396376(+) | protein_length=741 | sequence_SO=chromosome | SO=protein_coding_gene | is_pseudo=false	0	FALSE	10.789	6	4	4	4	741	81	9.61	5.03	4	3.429	1.78	0.266778	311964	1.06976e+06	95.84	5.95	711779	136730	1.11573e+06	1.02569e+06	131243	15527.2	422027	1.02569e+06	Peak Found	Peak Found	Peak Found	High	1
TGGT1_276130	transcript=TGGT1_276130-t26_1 | gene=TGGT1_276130 | organism=Toxoplasma_gondii_GT1 | gene_product=Pept_C1 domain-containing protein [Source:UniProtKB/TrEMBL;Acc:S7UNK8] | transcript_product=cathepsin CPC2 | location=TGGT1_chrIII:114076-122551(-) | protein_length=753 | sequence_SO=chromosome | SO=protein_coding_gene | is_pseudo=false	0	FALSE	10.473	7	4	4	4	753	83	5.62	2.31	4	3.318	1.73	0.296924	128259	425583	87.88	48.17	265421	61978.2	298467	606837	48940.1	7038.32	112896	606837	Peak Found	Peak Found	Peak Found	High	1
TGGT1_211700	transcript=TGGT1_211700-t26_1 | gene=TGGT1_211700 | organism=Toxoplasma_gondii_GT1 | gene_product=hypothetical protein | transcript_product=hypothetical protein | location=TGGT1_chrIV:1515365-1526809(-) | protein_length=2520 | sequence_SO=chromosome | SO=protein_coding_gene | is_pseudo=false	0.003	FALSE	3.353	0	1	1	1	2520	273.8	8.07	0	1	3.304	1.72	0.3002	17028.7	56258.1	NA	13.39	NA	17028.7	51160.8	61863.3	NA	1933.8	19351.7	61863.3	Not Found	Peak Found	Peak Found	High	1
TGGT1_269960	transcript=TGGT1_269960-t26_1 | gene=TGGT1_269960 | organism=Toxoplasma_gondii_GT1 | gene_product=14_3_3 domain-containing protein [Source:UniProtKB/TrEMBL;Acc:S7V4X7] | transcript_product=14-3-3 superfamily protein | location=TGGT1_chrVIII:5492015-5497834(+) | protein_length=476 | sequence_SO=chromosome | SO=protein_coding_gene | is_pseudo=false	0	FALSE	8.196	9	3	3	3	476	51.4	5.3	0	3	3.223	1.69	0.318848	159108	512764	68.38	8.54	269648	93882.7	482682	544720	49719.5	10661.4	182576	544720	Peak Found	Peak Found	Peak Found	High	1	Methylthio [C203]
TGGT1_231070	transcript=TGGT1_231070-t26_1 | gene=TGGT1_231070 | organism=Toxoplasma_gondii_GT1 | gene_product=Protein kinase domain-containing protein [Source:UniProtKB/TrEMBL;Acc:S7WIG3] | transcript_product=protein kinase | location=TGGT1_chrVIII:1218431-1222387(+) | protein_length=1318 | sequence_SO=chromosome | SO=protein_coding_gene | is_pseudo=false	0	FALSE	12.329	5	5	6	5	1318	141.4	6.87	1.9	5	3.151	1.66	0.323962	352023	1.10922e+06	89.98	8.95	746601	165979	1.04108e+06	1.18183e+06	137664	18848.8	393791	1.18183e+06	Peak Found	Peak Found	High	High	1
TGGT1_320030	transcript=TGGT1_320030-t26_1 | gene=TGGT1_320030 | organism=Toxoplasma_gondii_GT1 | gene_product=hypothetical protein | transcript_product=hypothetical protein | location=TGGT1_chrIV:512303-514561(+) | protein_length=752 | sequence_SO=chromosome | SO=protein_coding_gene | is_pseudo=false	0	FALSE	4.497	4	2	2	2	752	81.7	10.32	0	2	3.132	1.65	0.323962	71234.4	223099	NA	57.49	71234.4	NA	144926	343438	13134.7	NA	54818.6	343438	Peak Found	Not Found	Peak Found	High	1
TGGT1_206690	transcript=TGGT1_206690-t26_1 | gene=TGGT1_206690 | organism=Toxoplasma_gondii_GT1 | gene_product=Glideosome-associated protein with multiple-membrane spans GAPM2B [Source:UniProtKB/TrEMBL;Acc:A0A125YVU7] | transcript_product=glideosome-associated protein with multiple-membrane spans GAPM2B | location=TGGT1_chrVIIa:697425-699242(+) | protein_length=426 | sequence_SO=chromosome | SO=protein_coding…	0	FALSE	10.54	16	4	5	4	426	46.8	5.15	1.83	4	3.111	1.64	0.323962	853833	2.65641e+06	70.33	6.72	1.47357e+06	494739	2.533e+06	2.78584e+06	271706	56183.2	958114	2.78584e+06	Peak Found	Peak Found	High	High	1
TGGT1_257430	transcript=TGGT1_257430-t26_1 | gene=TGGT1_257430 | organism=Toxoplasma_gondii_GT1 | gene_product=hypothetical protein | transcript_product=hypothetical protein | location=TGGT1_chrVIIb:3984968-3993377(+) | protein_length=2250 | sequence_SO=chromosome | SO=protein_coding_gene | is_pseudo=false	0	FALSE	7.814	2	4	4	4	2250	238.6	10.74	1.63	4	3.101	1.63	0.323962	155406	481960	102.77	20.01	390599	61831	417983	555728	72021.3	7021.6	158103	555728	Peak Found	Peak Found	Peak Found	High	1
TGGT1_292950	transcript=TGGT1_292950-t26_1 | gene=TGGT1_292950 | organism=Toxoplasma_gondii_GT1 | gene_product=hypothetical protein | transcript_product=hypothetical protein | location=TGGT1_chrIa:22336-28275(-) | protein_length=1979 | sequence_SO=chromosome | SO=protein_coding_gene | is_pseudo=false	0	FALSE	15.361	4	6	6	6	1979	210.7	9.13	8.27	6	3.062	1.61	0.337908	233281	714201	100.32	0.71	565770	96187.3	710645	717774	104321	10923.1	268803	717774	Peak Found	Peak Found	High	High	1
TGGT1_269770	transcript=TGGT1_269770-t26_1 | gene=TGGT1_269770 | organism=Toxoplasma_gondii_GT1 | gene_product=WD_REPEATS_REGION domain-containing protein [Source:UniProtKB/TrEMBL;Acc:S7V4H4] | transcript_product=WD domain, G-beta repeat-containing protein | location=TGGT1_chrVIII:5602444-5612212(+) | protein_length=1127 | sequence_SO=chromosome | SO=protein_coding_gene | is_pseudo=false	0	FALSE	7.734	4	4	4	4	1127	121.2	8.02	0	4	3.003	1.59	0.356035	146651	440325	81.05	27.41	281534	76391	361852	535816	51911.1	8675.06	136871	535816	Peak Found	Peak Found	Peak Found	High	1
TGGT1_271930	transcript=TGGT1_271930-t26_1 | gene=TGGT1_271930 | organism=Toxoplasma_gondii_GT1 | gene_product=hypothetical protein | transcript_product=hypothetical protein | location=TGGT1_chrVIII:4274565-4276322(+) | protein_length=234 | sequence_SO=chromosome | SO=protein_coding_gene | is_pseudo=false	0	FALSE	29.821	50	6	15	6	234	26.1	5.31	24.73	6	2.997	1.58	0.356189	1.4028e+06	4.20407e+06	85.95	1.68	2.84004e+06	692890	4.15439e+06	4.25434e+06	523666	78685.4	1.57141e+06	4.25434e+06	High	Peak Found	High	High	1	Phospho [S107; S155]; Methylthio [C17]
TGGT1_266630	transcript=TGGT1_266630-t26_1 | gene=TGGT1_266630 | organism=Toxoplasma_gondii_GT1 | gene_product=ANK_REP_REGION domain-containing protein [Source:UniProtKB/TrEMBL;Acc:A0A125YLZ4] | transcript_product=hypothetical protein | location=TGGT1_chrIX:900290-905135(+) | protein_length=582 | sequence_SO=chromosome | SO=protein_coding_gene | is_pseudo=false	0	FALSE	10.377	11	4	4	4	582	67.3	8.21	4.05	4	2.991	1.58	0.356636	363532	1.08728e+06	103.88	10.44	929226	142221	1.00977e+06	1.17073e+06	171337	16150.8	381949	1.17073e+06	Peak Found	Peak Found	Peak Found	High	1
TGGT1_286720	transcript=TGGT1_286720-t26_1 | gene=TGGT1_286720 | organism=Toxoplasma_gondii_GT1 | gene_product=SHSP domain-containing protein [Source:UniProtKB/TrEMBL;Acc:A0A125YWV5] | transcript_product=heat shock protein HSP28 | location=TGGT1_chrV:1565219-1566049(+) | protein_length=276 | sequence_SO=chromosome | SO=protein_coding_gene | is_pseudo=false	0.001	FALSE	3.674	11	2	2	2	276	31	6.23	0	2	2.946	1.56	0.368477	75163.1	221456	NA	26.09	75163.1	NA	183750	266898	13859.1	NA	69504	266898	Peak Found	Not Found	Peak Found	High	1
TGGT1_258090	transcript=TGGT1_258090-t26_1 | gene=TGGT1_258090 | organism=Toxoplasma_gondii_GT1 | gene_product=hypothetical protein | transcript_product=hypothetical protein | location=TGGT1_chrVIIb:3544361-3553453(-) | protein_length=954 | sequence_SO=chromosome | SO=protein_coding_gene | is_pseudo=false	0	FALSE	28.714	16	12	16	12	954	106	7.49	6.72	12	2.898	1.54	0.371968	864843	2.50651e+06	72.67	4.97	1.52614e+06	490093	2.41999e+06	2.59612e+06	281401	55655.6	915368	2.59612e+06	High	Peak Found	High	High	1
TGGT1_293360	transcript=TGGT1_293360-t26_1 | gene=TGGT1_293360 | organism=Toxoplasma_gondii_GT1 | gene_product=hypothetical protein | transcript_product=hypothetical protein | location=TGGT1_chrIa:262977-264056(-) | protein_length=243 | sequence_SO=chromosome | SO=protein_coding_gene | is_pseudo=false	0	FALSE	27.463	53	7	14	7	243	26.7	4.46	13.21	7	2.848	1.51	0.371968	1.71845e+06	4.89452e+06	60.15	8.71	2.70623e+06	1.09121e+06	4.6017e+06	5.20598e+06	498994	123919	1.7406e+06	5.20598e+06	Peak Found	Peak Found	High	High	1
TGGT1_264990	transcript=TGGT1_264990-t26_1 | gene=TGGT1_264990 | organism=Toxoplasma_gondii_GT1 | gene_product=hypothetical protein | transcript_product=hypothetical protein | location=TGGT1_chrIX:1680342-1682033(+) | protein_length=259 | sequence_SO=chromosome | SO=protein_coding_gene | is_pseudo=false	0	FALSE	6.696	11	3	3	3	259	29.1	7.02	0	3	2.777	1.47	0.40803	155240	431108	54.08	15.24	232250	103765	386893	480376	42823.9	11783.7	146343	480376	Peak Found	Peak Found	Peak Found	High	1
TGGT1_219270	transcript=TGGT1_219270-t26_1 | gene=TGGT1_219270 | organism=Toxoplasma_gondii_GT1 | gene_product=Multi-pass transmembrane protein [Source:UniProtKB/TrEMBL;Acc:A0A125YRY2] | transcript_product=multi-pass transmembrane protein | location=TGGT1_chrXII:948336-949904(+) | protein_length=389 | sequence_SO=chromosome | SO=protein_coding_gene | is_pseudo=false	0	FALSE	23.916	30	6	18	6	389	43	4.94	39.06	6	2.768	1.47	0.40803	4.54697e+06	1.25838e+07	53.96	13.87	6.79581e+06	3.04231e+06	1.14044e+07	1.38851e+07	1.25306e+06	345488	4.31375e+06	1.38851e+07	High	High	High	High	1	Phospho [S348]; Methylthio [C289]
TGGT1_246550	transcript=TGGT1_246550-t26_1 | gene=TGGT1_246550 | organism=Toxoplasma_gondii_GT1 | gene_product=Peptidase A1 domain-containing protein [Source:UniProtKB/TrEMBL;Acc:A0A125YUQ4] | transcript_product=aspartyl protease ASP3 | location=TGGT1_chrXII:2777006-2782288(+) | protein_length=643 | sequence_SO=chromosome | SO=protein_coding_gene | is_pseudo=false	0	FALSE	5.059	7	2	2	2	643	69.1	5.64	0	2	2.721	1.44	0.424672	86102.3	234244	104.17	24.45	221065	33535.9	196711	278940	40761.4	3808.38	74406.3	278940	Peak Found	Peak Found	Peak Found	High	1
TGGT1_232780	transcript=TGGT1_232780-t26_1 | gene=TGGT1_232780 | organism=Toxoplasma_gondii_GT1 | gene_product=hypothetical protein | transcript_product=hypothetical protein | location=TGGT1_chrVIII:2255308-2260311(-) | protein_length=713 | sequence_SO=chromosome | SO=protein_coding_gene | is_pseudo=false	0	FALSE	7.26	5	3	3	3	713	77.6	7.39	0	3	2.709	1.44	0.424672	152941	414296	34.96	13.57	196859	118820	376292	456139	36298.3	13493.4	142333	456139	Peak Found	Peak Found	Peak Found	High	1	Methylthio [C452]
TGGT1_224000	transcript=TGGT1_224000-t26_1 | gene=TGGT1_224000 | organism=Toxoplasma_gondii_GT1 | gene_product=hypothetical protein | transcript_product=hypothetical protein | location=TGGT1_chrX:3299753-3302957(-) | protein_length=740 | sequence_SO=chromosome | SO=protein_coding_gene | is_pseudo=false	0	FALSE	4.917	5	3	3	3	740	82.2	5.19	0	3	2.708	1.44	0.424672	138826	375953	95.05	7.55	313486	61478.6	396579	356400	57802.6	6981.58	150007	356400	Peak Found	Peak Found	Peak Found	High	1
TGGT1_201760	transcript=TGGT1_201760-t26_1 | gene=TGGT1_201760 | organism=Toxoplasma_gondii_GT1 | gene_product=hypothetical protein | transcript_product=hypothetical protein | location=TGGT1_chrVIIa:3716556-3719107(+) | protein_length=336 | sequence_SO=chromosome | SO=protein_coding_gene | is_pseudo=false	0	FALSE	6.326	14	3	3	3	336	37.3	7.74	0	3	2.69	1.43	0.424672	161095	433398	NA	2.34	161095	NA	440615	426299	29703.9	NA	166664	426299	Peak Found	Not Found	Peak Found	High	1	Methylthio [C20]
TGGT1_286790	transcript=TGGT1_286790-t26_1 | gene=TGGT1_286790 | organism=Toxoplasma_gondii_GT1 | gene_product=Pinin_SDK_memA domain-containing protein [Source:UniProtKB/TrEMBL;Acc:A0A125YP28] | transcript_product=nuclear factor NF2 | location=TGGT1_chrV:1521521-1525782(+) | protein_length=313 | sequence_SO=chromosome | SO=protein_coding_gene | is_pseudo=false	0	FALSE	7.954	16	3	4	3	313	36	6.24	4.24	3	2.68	1.42	0.424672	298158	799040	27.01	16.49	245736	361763	710738	898312	45310.5	41082.2	268838	898312	Peak Found	Peak Found	High	High	1
TGGT1_233480	transcript=TGGT1_233480-t26_1 | gene=TGGT1_233480 | organism=Toxoplasma_gondii_GT1 | gene_product=SAG-related sequence SRS29C [Source:UniProtKB/TrEMBL;Acc:S7WBY8] | transcript_product=SAG-related sequence SRS29C | location=TGGT1_chrVIII:2667297-2668415(+) | protein_length=372 | sequence_SO=chromosome | SO=protein_coding_gene | is_pseudo=false	0	FALSE	22.724	28	6	21	6	372	39.2	7.52	35.22	6	2.638	1.4	0.443135	5.65451e+06	1.49138e+07	34.46	0.58	7.25062e+06	4.40975e+06	1.48527e+07	1.49752e+07	1.33692e+06	500777	5.61806e+06	1.49752e+07	High	Peak Found	High	High	1	Methylthio [C177; C197; C290; C303]
TGGT1_312150	transcript=TGGT1_312150-t26_1 | gene=TGGT1_312150 | organism=Toxoplasma_gondii_GT1 | gene_product=hypothetical protein | transcript_product=hypothetical protein | location=TGGT1_chrXI:2422714-2426663(+) | protein_length=567 | sequence_SO=chromosome | SO=protein_coding_gene | is_pseudo=false	0.002	FALSE	3.906	6	2	2	2	567	60.6	6.9	0	2	2.636	1.4	0.443135	61575.6	162316	63.27	0.09	38048.2	99651.4	162420	162211	7015.59	11316.5	61435.8	162211	Peak Found	Peak Found	Peak Found	High	1
TGGT1_243620	transcript=TGGT1_243620-t26_1 | gene=TGGT1_243620 | organism=Toxoplasma_gondii_GT1 | gene_product=hypothetical protein | transcript_product=hypothetical protein | location=TGGT1_chrVI:2669876-2673295(-) | protein_length=359 | sequence_SO=chromosome | SO=protein_coding_gene | is_pseudo=false	0.013	FALSE	2.176	5	1	1	1	359	39.5	5.17	0	1	2.62	1.39	0.447399	86716	227199	NA	NA	NA	86716	227199	NA	NA	9847.58	85938.6	NA	Not Found	Peak Found	High	Not Found	1
TGGT1_233450	transcript=TGGT1_233450-t26_1 | gene=TGGT1_233450 | organism=Toxoplasma_gondii_GT1 | gene_product=SAG-related sequence SRS29A [Source:UniProtKB/TrEMBL;Acc:S7V3P1] | transcript_product=SAG-related sequence SRS29A | location=TGGT1_chrVIII:2656903-2658165(+) | protein_length=420 | sequence_SO=chromosome | SO=protein_coding_gene | is_pseudo=false	0.003	FALSE	3.073	7	2	2	2	420	44.2	7.27	0	2	2.617	1.39	0.447452	275003	719556	21.14	3.51	319702	236553	737634	701920	58948.8	26863.3	279012	701920	Peak Found	Peak Found	Peak Found	High	1	Methylthio [C89]
TGGT1_231160	transcript=TGGT1_231160-t26_1 | gene=TGGT1_231160 | organism=Toxoplasma_gondii_GT1 | gene_product=hypothetical protein | transcript_product=hypothetical protein | location=TGGT1_chrVIII:1271630-1273190(+) | protein_length=178 | sequence_SO=chromosome | SO=protein_coding_gene | is_pseudo=false	0	FALSE	4.696	11	1	2	1	178	18.3	5.08	0	1	2.603	1.38	0.450005	253153	658973	19.14	5.55	290075	220930	633621	685340	53486.1	25089	239669	685340	Peak Found	Peak Found	Peak Found	High	1
TGGT1_267140	transcript=TGGT1_267140-t26_1 | gene=TGGT1_267140 | organism=Toxoplasma_gondii_GT1 | gene_product=SAG-related sequence SRS38B [Source:UniProtKB/TrEMBL;Acc:S7UH64] | transcript_product=SAG-related sequence SRS38B | location=TGGT1_chrIX:600940-602112(+) | protein_length=390 | sequence_SO=chromosome | SO=protein_coding_gene | is_pseudo=false	0.033	FALSE	1.589	3	1	1	1	390	41	5.76	0	1	2.545	1.35	0.475168	56351.3	143425	8.44	2.18	59821.5	53082.3	145650	141235	11030.3	6028.09	55092.6	141235	Peak Found	Peak Found	Peak Found	High	1	Methylthio [C195]
TGGT1_313480	transcript=TGGT1_313480-t26_1 | gene=TGGT1_313480 | organism=Toxoplasma_gondii_GT1 | gene_product=hypothetical protein | transcript_product=hypothetical protein | location=TGGT1_chrXI:3385333-3400705(+) | protein_length=1381 | sequence_SO=chromosome | SO=protein_coding_gene | is_pseudo=false	0	FALSE	6.327	3	3	3	3	1381	152.5	5.62	1.68	3	2.528	1.34	0.476547	134533	340038	94.2	31.95	300513	60227.4	270212	427907	55410.7	6839.5	102208	427907	Peak Found	Peak Found	Peak Found	High	1
TGGT1_213410	transcript=TGGT1_213410-t26_1 | gene=TGGT1_213410 | organism=Toxoplasma_gondii_GT1 | gene_product=Sm domain-containing protein [Source:UniProtKB/TrEMBL;Acc:A0A125YSB2] | transcript_product=putative small nuclear ribonucleoprotein f (snrnp-f) | location=TGGT1_chrV:878051-879971(+) | protein_length=87 | sequence_SO=chromosome | SO=protein_coding_gene | is_pseudo=false	0.033	FALSE	1.594	9	1	2	1	87	10.1	4.97	0	1	2.451	1.29	0.518247	227418	557405	12.9	36.88	207537	249203	727956	426811	38267.2	28299.8	275351	426811	Peak Found	Peak Found	High	High	1	Methylthio [C68]
TGGT1_269200	transcript=TGGT1_269200-t26_1 | gene=TGGT1_269200 | organism=Toxoplasma_gondii_GT1 | gene_product=Putative crooked neck family 1 protein isoform 2 [Source:UniProtKB/TrEMBL;Acc:S7V4C3] | transcript_product=putative crooked neck family 1 protein isoform 2 | location=TGGT1_chrVIII:5988095-5997726(-) | protein_length=686 | sequence_SO=chromosome | SO=protein_coding_gene | is_pseudo=false	0	FALSE	4.846	4	2	3	2	686	81.6	8.28	0	2	2.438	1.29	0.523026	91089	222063	79.63	13.5	172279	48161.6	201785	244379	31765.9	5469.29	76325.8	244379	Peak Found	Peak Found	High	High	1
TGGT1_222220	transcript=TGGT1_222220-t26_1 | gene=TGGT1_222220 | organism=Toxoplasma_gondii_GT1 | gene_product=Alveolin domain containing intermediate filament IMC7 [Source:UniProtKB/TrEMBL;Acc:A0A125YVP0] | transcript_product=alveolin domain containing intermediate filament IMC7 | location=TGGT1_chrII:949239-952716(+) | protein_length=429 | sequence_SO=chromosome | SO=protein_coding_gene | is_pseudo=false	0	FALSE	35.278	38	11	25	11	429	46.8	5.1	32.7	11	2.402	1.26	0.543617	6.52601e+06	1.56763e+07	71.34	2.73	1.13705e+07	3.74557e+06	1.5377e+07	1.59815e+07	2.09656e+06	425351	5.8164e+06	1.59815e+07	High	High	High	High	1	Methylthio [C136; C270]
TGGT1_220510	transcript=TGGT1_220510-t26_1 | gene=TGGT1_220510 | organism=Toxoplasma_gondii_GT1 | gene_product=hypothetical protein | transcript_product=hypothetical protein | location=TGGT1_chrV:328785-330623(+) | protein_length=612 | sequence_SO=chromosome | SO=protein_coding_gene | is_pseudo=false	0	FALSE	6.105	6	3	3	3	612	64.3	5.58	0	3	2.401	1.26	0.543617	263764	633370	88.82	7.31	551816	126078	667024	601415	101748	14317.5	252303	601415	Peak Found	Peak Found	Peak Found	High	1
TGGT1_285870	transcript=TGGT1_285870-t26_1 | gene=TGGT1_285870 | organism=Toxoplasma_gondii_GT1 | gene_product=SAG domain-containing protein [Source:UniProtKB/TrEMBL;Acc:S7UNS7] | transcript_product=SAG-related sequence SRS20A | location=TGGT1_chrV:2015649-2017548(-) | protein_length=328 | sequence_SO=chromosome | SO=protein_coding_gene | is_pseudo=false	0	FALSE	21.995	37	8	11	8	328	34.9	7.77	7.49	8	2.381	1.25	0.552012	1.53691e+06	3.65977e+06	37.56	2.74	2.01753e+06	1.17078e+06	3.58948e+06	3.73144e+06	372006	132955	1.35773e+06	3.73144e+06	Peak Found	Peak Found	High	High	1	Methylthio [C63; C82; C87; C126; C214]
TGGT1_253370	transcript=TGGT1_253370-t26_1 | gene=TGGT1_253370 | organism=Toxoplasma_gondii_GT1 | gene_product=hypothetical protein | transcript_product=hypothetical protein | location=TGGT1_chrIII:861500-883749(+) | protein_length=1981 | sequence_SO=chromosome | SO=protein_coding_gene | is_pseudo=false	0	FALSE	11.123	4	5	5	5	1981	216.3	7.25	1.69	5	2.373	1.25	0.557726	132597	314596	89.74	47.16	280418	62699.3	222423	444966	51705.4	7120.21	84132.2	444966	Peak Found	Peak Found	Peak Found	High	1
TGGT1_314740	transcript=TGGT1_314740-t26_1 | gene=TGGT1_314740 | organism=Toxoplasma_gondii_GT1 | gene_product=PSP domain-containing protein [Source:UniProtKB/TrEMBL;Acc:S7UMG6] | transcript_product=PSP protein | location=TGGT1_chrXI:4206581-4212262(+) | protein_length=758 | sequence_SO=chromosome | SO=protein_coding_gene | is_pseudo=false	0	FALSE	5.026	3	2	2	2	758	82.2	5.38	0	2	2.358	1.24	0.566518	1.18575e+06	2.7961e+06	36.48	13.27	910686	1.54389e+06	2.54488e+06	3.07213e+06	167919	175326	962607	3.07213e+06	Peak Found	Peak Found	Peak Found	High	1
TGGT1_247450	transcript=TGGT1_247450-t26_1 | gene=TGGT1_247450 | organism=Toxoplasma_gondii_GT1 | gene_product=hypothetical protein | transcript_product=hypothetical protein | location=TGGT1_chrXII:3275746-3284022(+) | protein_length=2303 | sequence_SO=chromosome | SO=protein_coding_gene | is_pseudo=false	0.001	FALSE	3.664	1	2	2	2	2303	245.7	10.01	0	2	2.354	1.24	0.567696	134338	316237	66.92	34.73	224650	80332.4	246111	406343	41422.5	9122.65	93092.2	406343	Peak Found	Peak Found	High	High	1
TGGT1_226040	transcript=TGGT1_226040-t26_1 | gene=TGGT1_226040 | organism=Toxoplasma_gondii_GT1 | gene_product=EF hand domain-containing protein [Source:UniProtKB/TrEMBL;Acc:A0A125YWI4] | transcript_product=EF hand domain-containing protein | location=TGGT1_chrX:1759538-1760047(+) | protein_length=169 | sequence_SO=chromosome | SO=protein_coding_gene | is_pseudo=false	0	FALSE	7.775	18	3	3	3	169	19	5.05	4.12	3	2.345	1.23	0.570952	311249	730032	67.54	19.68	523438	185076	634595	839820	96515.1	21017.5	240037	839820	Peak Found	Peak Found	Peak Found	High	1	Methylthio [C107; C161]
TGGT1_257680	transcript=TGGT1_257680-t26_1 | gene=TGGT1_257680 | organism=Toxoplasma_gondii_GT1 | gene_product=EF-hand domain-containing protein [Source:UniProtKB/TrEMBL;Acc:A0A125YYD3] | transcript_product=myosin light chain MLC1 | location=TGGT1_chrVIIb:3843366-3845688(+) | protein_length=213 | sequence_SO=chromosome | SO=protein_coding_gene | is_pseudo=false	0	FALSE	37.685	62	8	34	8	213	24.1	4.65	68.71	8	2.343	1.23	0.571128	1.38513e+07	3.24486e+07	39.93	8.33	1.85154e+07	1.03621e+07	3.05907e+07	3.44193e+07	3.414e+06	1.17673e+06	1.1571e+07	3.44193e+07	High	High	High	High	1	Methylthio [C53; C58]
TGGT1_215400	transcript=TGGT1_215400-t26_1 | gene=TGGT1_215400 | organism=Toxoplasma_gondii_GT1 | gene_product=RRM domain-containing protein [Source:UniProtKB/TrEMBL;Acc:A0A125YMD0] | transcript_product=RNA recognition motif-containing protein | location=TGGT1_chrX:6833154-6834269(+) | protein_length=371 | sequence_SO=chromosome | SO=protein_coding_gene | is_pseudo=false	0.013	FALSE	1.999	2	1	1	1	371	41.3	10.58	0	1	2.327	1.22	0.578718	92643	215545	NA	NA	92643	NA	215545	NA	17082.2	NA	81530.4	NA	Peak Found	Not Found	High	Not Found	1
TGGT1_243250	transcript=TGGT1_243250-t26_1 | gene=TGGT1_243250 | organism=Toxoplasma_gondii_GT1 | gene_product=Myosin motor domain-containing protein [Source:UniProtKB/TrEMBL;Acc:A0A125YQD3] | transcript_product=myosin H | location=TGGT1_chrVI:2380998-2399536(-) | protein_length=1513 | sequence_SO=chromosome | SO=protein_coding_gene | is_pseudo=false	0	FALSE	55.525	18	20	26	20	1513	169.6	9.51	32.13	20	2.312	1.21	0.585847	2.22676e+06	5.14875e+06	69.43	1.69	3.81084e+06	1.30114e+06	5.0876e+06	5.21063e+06	702669	147759	1.9244e+06	5.21063e+06	High	Peak Found	High	High	1	Methylthio [C98; C724]
TGGT1_260540	transcript=TGGT1_260540-t26_1 | gene=TGGT1_260540 | organism=Toxoplasma_gondii_GT1 | gene_product=Alveolin domain containing intermediate filament IMC14 [Source:UniProtKB/TrEMBL;Acc:S7UYY7] | transcript_product=alveolin domain containing intermediate filament IMC14 | location=TGGT1_chrVIIb:2144399-2148137(+) | protein_length=733 | sequence_SO=chromosome | SO=protein_coding_gene | is_pseudo=false	0	FALSE	35.131	24	14	18	14	733	83.3	8.44	7.63	14	2.282	1.19	0.605463	2.47034e+06	5.63628e+06	57.89	5.53	3.81607e+06	1.59918e+06	5.41988e+06	5.86131e+06	703633	181605	2.05008e+06	5.86131e+06	Peak Found	Peak Found	High	High	1	Methylthio [C430]
TGGT1_219280	transcript=TGGT1_219280-t26_1 | gene=TGGT1_219280 | organism=Toxoplasma_gondii_GT1 | gene_product=Actin like protein ALP1 [Source:UniProtKB/TrEMBL;Acc:A0A125YSC0] | transcript_product=actin like protein ALP1 | location=TGGT1_chrXII:936313-942608(-) | protein_length=414 | sequence_SO=chromosome | SO=protein_coding_gene | is_pseudo=false	0.003	FALSE	3.528	4	2	2	2	414	46.1	5.1	0	2	2.266	1.18	0.613309	69958.4	158495	39.29	58.7	52590.9	93061.2	101901	246523	9697.08	10568.1	38544.2	246523	Peak Found	Peak Found	Peak Found	High	1
TGGT1_273560	transcript=TGGT1_273560-t26_1 | gene=TGGT1_273560 | organism=Toxoplasma_gondii_GT1 | gene_product=Kinesin motor domain-containing protein [Source:UniProtKB/TrEMBL;Acc:S7V3F2] | transcript_product=putative kinesin heavy chain | location=TGGT1_chrVIII:3381230-3400326(-) | protein_length=1641 | sequence_SO=chromosome | SO=protein_coding_gene | is_pseudo=false	0	FALSE	65.9	19	25	36	25	1641	181.3	6.4	35.59	25	2.255	1.17	0.617833	3.27193e+06	7.37881e+06	64.36	5	5.34676e+06	2.00225e+06	7.1223e+06	7.64456e+06	985873	227378	2.69403e+06	7.64456e+06	High	High	High	High	1	Methylthio [C134; C1010; C1208; C1321; C1361]
TGGT1_258410	transcript=TGGT1_258410-t26_1 | gene=TGGT1_258410 | organism=Toxoplasma_gondii_GT1 | gene_product=Photosensitized INA-labeled protein PHIL1 [Source:UniProtKB/TrEMBL;Acc:A0A125YLU9] | transcript_product=photosensitized INA-labeled protein PHIL1 | location=TGGT1_chrVIIb:3400417-3400914(+) | protein_length=165 | sequence_SO=chromosome | SO=protein_coding_gene | is_pseudo=false	0	FALSE	25.128	43	6	18	6	165	18.8	6.33	15.97	6	2.247	1.17	0.617833	6.78876e+06	1.52518e+07	35.9	8.61	8.80053e+06	5.23688e+06	1.43495e+07	1.62109e+07	1.6227e+06	594706	5.42772e+06	1.62109e+07	High	Peak Found	High	High	1	Methylthio [C133; C135]
TGGT1_235470	transcript=TGGT1_235470-t26_1 | gene=TGGT1_235470 | organism=Toxoplasma_gondii_GT1 | gene_product=Myosin motor domain-containing protein [Source:UniProtKB/TrEMBL;Acc:S7W634] | transcript_product=myosin A | location=TGGT1_chrX:4773284-4778894(+) | protein_length=831 | sequence_SO=chromosome | SO=protein_coding_gene | is_pseudo=false	0	FALSE	113.905	47	32	100	32	831	93.3	8.16	191.34	32	2.246	1.17	0.617833	5.08685e+07	1.14244e+08	57.18	6.16	7.81034e+07	3.31304e+07	1.09372e+08	1.19334e+08	1.44012e+07	3.76233e+06	4.13702e+07	1.19334e+08	High	High	High	High	1	Methylthio [C57; C296; C548]; Phospho [S20; S21]
TGGT1_239770	transcript=TGGT1_239770-t26_1 | gene=TGGT1_239770 | organism=Toxoplasma_gondii_GT1 | gene_product=Alveolin domain containing intermediate filament IMC11 [Source:UniProtKB/TrEMBL;Acc:S7US03] | transcript_product=alveolin domain containing intermediate filament IMC11 | location=TGGT1_chrVI:897071-897965(-) | protein_length=134 | sequence_SO=chromosome | SO=protein_coding_gene | is_pseudo=false	0.031	FALSE	1.731	6	1	1	1	134	15.6	9.28	1.62	1	2.244	1.17	0.617833	115289	258732	47.78	14.66	163873	81108.8	287107	233161	30216.1	9210.81	108599	233161	Peak Found	Peak Found	Peak Found	High	1
TGGT1_217510	transcript=TGGT1_217510-t26_1 | gene=TGGT1_217510 | organism=Toxoplasma_gondii_GT1 | gene_product=hypothetical protein | transcript_product=hypothetical protein | location=TGGT1_chrXII:1824650-1826480(+) | protein_length=380 | sequence_SO=chromosome | SO=protein_coding_gene | is_pseudo=false	0	FALSE	19.481	34	8	15	8	380	42.1	8.79	7.92	8	2.232	1.16	0.619192	1.46742e+06	3.27517e+06	63.82	20.68	2.38646e+06	902309	3.79498e+06	2.82655e+06	440032	102467	1.43546e+06	2.82655e+06	High	High	High	High	1	Methylthio [C295]
TGGT1_254870	transcript=TGGT1_254870-t26_1 | gene=TGGT1_254870 | organism=Toxoplasma_gondii_GT1 | gene_product=hypothetical protein | transcript_product=hypothetical protein | location=TGGT1_chrIII:1976274-1981704(-) | protein_length=428 | sequence_SO=chromosome | SO=protein_coding_gene | is_pseudo=false	0.001	FALSE	3.665	5	2	2	2	428	47	5.71	0	2	2.231	1.16	0.619192	144048	321352	95.41	7.4	326813	63491	338639	304947	60260.1	7210.12	128091	304947	Peak Found	Peak Found	Peak Found	High	1
TGGT1_297960A	transcript=TGGT1_297960A-t26_1 | gene=TGGT1_297960A | organism=Toxoplasma_gondii_GT1 | gene_product=Rhoptry neck protein RON6 [Source:UniProtKB/TrEMBL;Acc:S7UKR5] | transcript_product=rhoptry neck protein RON6 | location=TGGT1_chrII:2113619-2118718(-) | protein_length=1510 | sequence_SO=chromosome | SO=protein_coding_gene | is_pseudo=false	0	FALSE	4.935	14	2	3	1	1510	157.6	4.65	0	2	2.223	1.15	0.62517	52754	117273	NA	6.14	52754	NA	112285	122481	9727.14	NA	42472.3	122481	Peak Found	Not Found	Peak Found	High	1
TGGT1_308840	transcript=TGGT1_308840-t26_1 | gene=TGGT1_308840 | organism=Toxoplasma_gondii_GT1 | gene_product=SAG-related sequence SRS51 [Source:UniProtKB/TrEMBL;Acc:S7W107] | transcript_product=SAG-related sequence SRS51 | location=TGGT1_chrXI:258885-259967(+) | protein_length=360 | sequence_SO=chromosome | SO=protein_coding_gene | is_pseudo=false	0	FALSE	15.502	29	5	10	5	360	38	6.2	21.51	5	2.214	1.15	0.632494	1.64706e+06	3.64657e+06	51.84	10.85	2.41922e+06	1.12135e+06	3.93783e+06	3.37686e+06	446073	127342	1.48949e+06	3.37686e+06	High	Peak Found	High	High	1	Methylthio [C106; C186; C214; C240; C256; C266]
TGGT1_228100	transcript=TGGT1_228100-t26_1 | gene=TGGT1_228100 | organism=Toxoplasma_gondii_GT1 | gene_product=hypothetical protein | transcript_product=hypothetical protein | location=TGGT1_chrX:493043-502437(-) | protein_length=1314 | sequence_SO=chromosome | SO=protein_coding_gene | is_pseudo=false	0.002	FALSE	4.092	2	2	3	2	1314	139.3	8.31	0	2	2.208	1.14	0.635482	92304	203824	3.15	0.15	94383	90270.8	204042	203605	17403	10251.3	77179.4	203605	Peak Found	Peak Found	High	High	1
TGGT1_260670	transcript=TGGT1_260670-t26_1 | gene=TGGT1_260670 | organism=Toxoplasma_gondii_GT1 | gene_product=Putative centrin [Source:UniProtKB/TrEMBL;Acc:S7W7A1] | transcript_product=putative centrin | location=TGGT1_chrVIIb:2043964-2046959(-) | protein_length=238 | sequence_SO=chromosome | SO=protein_coding_gene | is_pseudo=false	0	FALSE	17.677	38	6	11	6	238	26.6	6.42	5.27	6	2.204	1.14	0.635482	993804	2.19063e+06	50.27	0.33	1.44123e+06	685279	2.18551e+06	2.19576e+06	265744	77821.1	826673	2.19576e+06	High	High	High	High	1
TGGT1_203370	transcript=TGGT1_203370-t26_1 | gene=TGGT1_203370 | organism=Toxoplasma_gondii_GT1 | gene_product=Utp12 domain-containing protein [Source:UniProtKB/TrEMBL;Acc:S7W3Y0] | transcript_product=hypothetical protein | location=TGGT1_chrVIIa:2439891-2442215(-) | protein_length=774 | sequence_SO=chromosome | SO=protein_coding_gene | is_pseudo=false	0	FALSE	7.51	4	3	5	3	774	81.1	6.99	2.61	3	2.191	1.13	0.645325	259641	568934	108.73	1.05	718260	93856.5	564732	573168	132438	10658.5	213611	573168	Peak Found	Peak Found	High	High	1
TGGT1_309980	transcript=TGGT1_309980-t26_1 | gene=TGGT1_309980 | organism=Toxoplasma_gondii_GT1 | gene_product=Dynein heavy chain family protein [Source:UniProtKB/TrEMBL;Acc:S7W1A9] | transcript_product=dynein heavy chain family protein | location=TGGT1_chrXI:906306-950570(-) | protein_length=4610 | sequence_SO=chromosome | SO=protein_coding_gene | is_pseudo=false	0.037	FALSE	1.519	0	1	1	1	4610	522.7	6.13	0	1	2.191	1.13	0.645325	1.16235e+06	2.54657e+06	30.29	26.93	935113	1.44481e+06	2.1001e+06	3087947	172423	164074	794369	3087947	Peak Found	High	Peak Found	Peak Found	1	Phospho [T374]
TGGT1_227800	transcript=TGGT1_227800-t26_1 | gene=TGGT1_227800 | organism=Toxoplasma_gondii_GT1 | gene_product=EF hand domain-containing protein [Source:UniProtKB/TrEMBL;Acc:S7UXC8] | transcript_product=EF hand domain-containing protein | location=TGGT1_chrX:720180-729168(-) | protein_length=1280 | sequence_SO=chromosome | SO=protein_coding_gene | is_pseudo=false	0	FALSE	8.53	4	4	4	4	1280	135.8	6.04	4.01	4	2.173	1.12	0.650859	319238	693802	74.79	1.66	575063	177220	702000	685700	106034	20125.4	265533	685700	Peak Found	Peak Found	High	High	1
TGGT1_224520	transcript=TGGT1_224520-t26_1 | gene=TGGT1_224520 | organism=Toxoplasma_gondii_GT1 | gene_product=Alveolin domain containing intermediate filament IMC8 [Source:UniProtKB/TrEMBL;Acc:A0A125YGA2] | transcript_product=alveolin domain containing intermediate filament IMC8 | location=TGGT1_chrX:2910990-2913042(+) | protein_length=202 | sequence_SO=chromosome | SO=protein_coding_gene | is_pseudo=false	0.044	FALSE	1.433	5	1	1	1	202	22.9	6.7	0	1	2.17	1.12	0.650859	95143.9	206506	53.26	15.17	141386	64025.8	229978	185430	26069.8	7270.84	86989.6	185430	Peak Found	Peak Found	High	Peak Found	1	Methylthio [C178]
TGGT1_267420	transcript=TGGT1_267420-t26_1 | gene=TGGT1_267420 | organism=Toxoplasma_gondii_GT1 | gene_product=Putative mago nashi family protein 2 [Source:UniProtKB/TrEMBL;Acc:S7VW14] | transcript_product=putative mago nashi family protein 2 | location=TGGT1_chrIX:498202-500605(-) | protein_length=202 | sequence_SO=chromosome | SO=protein_coding_gene | is_pseudo=false	0	FALSE	7.22	15	3	4	3	202	23.7	7.78	3.81	3	2.168	1.12	0.650859	638517	1.38423e+06	58.45	7.19	990992	411410	1.31551e+06	1.45653e+06	182726	46720.2	497594	1.45653e+06	Peak Found	Peak Found	Peak Found	High	1
TGGT1_216080	transcript=TGGT1_216080-t26_1 | gene=TGGT1_216080 | organism=Toxoplasma_gondii_GT1 | gene_product=SET domain-containing protein [Source:UniProtKB/TrEMBL;Acc:A0A125YQK7] | transcript_product=apical complex lysine methyltransferase | location=TGGT1_chrXI:6322234-6324708(-) | protein_length=709 | sequence_SO=chromosome | SO=protein_coding_gene | is_pseudo=false	0.002	FALSE	3.955	4	2	2	2	709	79.4	4.41	0	2	2.162	1.11	0.651149	107837	233111	82.16	11.91	209458	55518.4	214236	253648	38621.4	6304.74	81035.5	253648	Peak Found	Peak Found	Peak Found	High	1
TGGT1_239400	transcript=TGGT1_239400-t26_1 | gene=TGGT1_239400 | organism=Toxoplasma_gondii_GT1 | gene_product=hypothetical protein | transcript_product=hypothetical protein | location=TGGT1_chrVI:611132-617706(+) | protein_length=1265 | sequence_SO=chromosome | SO=protein_coding_gene | is_pseudo=false	0	FALSE	19.613	7	8	9	8	1265	133.9	9.69	7.18	8	2.159	1.11	0.651149	1.03722e+06	2.23913e+06	50.81	1.43	1.5108e+06	712096	2.26195e+06	2.21655e+06	278572	80866.5	855587	2.21655e+06	High	Peak Found	High	High	1	Methylthio [C784]
TGGT1_310440	transcript=TGGT1_310440-t26_1 | gene=TGGT1_310440 | organism=Toxoplasma_gondii_GT1 | gene_product=Membrane occupation and recognition nexus protein MORN1 [Source:UniProtKB/TrEMBL;Acc:A0A125YJY7] | transcript_product=membrane occupation and recognition nexus protein MORN1 | location=TGGT1_chrXI:1306262-1307353(+) | protein_length=363 | sequence_SO=chromosome | SO=protein_coding_gene | is_pseudo=fa…	0	FALSE	29.855	38	12	17	12	363	40.9	5.97	10.68	12	2.152	1.11	0.656902	2.42112e+06	5.20918e+06	57.81	3.29	3.73724e+06	1.56848e+06	5.08945e+06	5.33173e+06	689099	178119	1.9251e+06	5.33173e+06	High	Peak Found	High	High	1
TGGT1_297070	transcript=TGGT1_297070-t26_1 | gene=TGGT1_297070 | organism=Toxoplasma_gondii_GT1 | gene_product=Alpha-carbonic anhydrase domain-containing protein [Source:UniProtKB/TrEMBL;Acc:A0A125YMC5] | transcript_product=hypothetical protein | location=TGGT1_chrII:1492810-1494671(-) | protein_length=519 | sequence_SO=chromosome | SO=protein_coding_gene | is_pseudo=false	0	FALSE	36.343	26	8	27	8	519	58.1	6.33	41.78	8	2.145	1.1	0.657149	5.91996e+06	1.26973e+07	61.02	12.55	9.39381e+06	3.73075e+06	1.16167e+07	1.38783e+07	1.7321e+06	423668	4.39404e+06	1.38783e+07	High	High	High	High	1	Methylthio [C134]
TGGT1_254880	transcript=TGGT1_254880-t26_1 | gene=TGGT1_254880 | organism=Toxoplasma_gondii_GT1 | gene_product=Alpha-galactosidase [Source:UniProtKB/TrEMBL;Acc:S7UMA1] | transcript_product=Alpha-galactosidase | location=TGGT1_chrIII:1983229-1990947(+) | protein_length=747 | sequence_SO=chromosome | SO=protein_coding_gene | is_pseudo=false	0	FALSE	26.491	18	11	13	11	747	81.8	6.73	8.95	11	2.138	1.1	0.660103	1.71634e+06	3.66948e+06	55.62	9.64	2.60105e+06	1.13255e+06	3.4272e+06	3.92889e+06	479600	128614	1.29635e+06	3.92889e+06	Peak Found	Peak Found	High	High	1
TGGT1_235380	transcript=TGGT1_235380-t26_1 | gene=TGGT1_235380 | organism=Toxoplasma_gondii_GT1 | gene_product=hypothetical protein | transcript_product=hypothetical protein | location=TGGT1_chrX:4705213-4712437(-) | protein_length=583 | sequence_SO=chromosome | SO=protein_coding_gene | is_pseudo=false	0	FALSE	27.716	30	11	11	11	583	65.2	9.26	10.39	11	2.12	1.08	0.67328	1.06802e+06	2.26453e+06	69.77	1.96	1.83354e+06	622116	2.23339e+06	2.2961e+06	338081	70648.3	844787	2.2961e+06	Peak Found	Peak Found	Peak Found	High	1	Methylthio [C171; C187; C350]
TGGT1_314790	transcript=TGGT1_314790-t26_1 | gene=TGGT1_314790 | organism=Toxoplasma_gondii_GT1 | gene_product=Small nuclear ribonucleoprotein G [Source:UniProtKB/TrEMBL;Acc:A0A125YU69] | transcript_product=putative small nuclear ribonucleoprotein G | location=TGGT1_chrXI:4249536-4250830(-) | protein_length=93 | sequence_SO=chromosome | SO=protein_coding_gene | is_pseudo=false	0	FALSE	5.812	33	2	4	2	93	10.2	8.87	3.6	2	2.106	1.07	0.685304	751124	1.58186e+06	100.16	7.84	1.8175e+06	310420	1.49646e+06	1.67213e+06	335122	35251.7	566041	1.67213e+06	Peak Found	High	High	High	1
TGGT1_229640	transcript=TGGT1_229640-t26_1 | gene=TGGT1_229640 | organism=Toxoplasma_gondii_GT1 | gene_product=hypothetical protein | transcript_product=hypothetical protein | location=TGGT1_chrVIII:347644-355417(+) | protein_length=1289 | sequence_SO=chromosome | SO=protein_coding_gene | is_pseudo=false	0	FALSE	24.166	11	10	10	10	1289	137.3	7.77	1.71	10	2.1	1.07	0.687167	746980	1.5687e+06	68.03	8.73	1.26187e+06	442184	1.47463e+06	1.66878e+06	232672	50215	557782	1.66878e+06	Peak Found	Peak Found	High	High	1
TGGT1_259010	transcript=TGGT1_259010-t26_1 | gene=TGGT1_259010 | organism=Toxoplasma_gondii_GT1 | gene_product=Putative vacuolar ATP synthase subunit d [Source:UniProtKB/TrEMBL;Acc:S7UYG8] | transcript_product=putative vacuolar ATP synthase subunit d | location=TGGT1_chrVIIb:2988734-2994961(-) | protein_length=396 | sequence_SO=chromosome | SO=protein_coding_gene | is_pseudo=false	0	FALSE	24.262	33	8	14	8	396	44.9	5.05	9.73	8	2.094	1.07	0.687167	1.85105e+06	3.87615e+06	60.16	13.63	2.91544e+06	1.17526e+06	3.51894e+06	4.26962e+06	537568	133464	1.33105e+06	4.26962e+06	High	Peak Found	High	High	1
TGGT1_230340	transcript=TGGT1_230340-t26_1 | gene=TGGT1_230340 | organism=Toxoplasma_gondii_GT1 | gene_product=hypothetical protein | transcript_product=hypothetical protein | location=TGGT1_chrVIII:711206-715922(+) | protein_length=949 | sequence_SO=chromosome | SO=protein_coding_gene | is_pseudo=false	0	FALSE	65.201	33	24	36	24	949	102.3	7.23	33.86	24	2.09	1.06	0.68968	4.69583e+06	9.81373e+06	62.51	0.75	7.54881e+06	2.9211e+06	9.76204e+06	9.86569e+06	1.3919e+06	331723	3.69252e+06	9.86569e+06	High	Peak Found	High	High	1	Methylthio [C647; C910]
TGGT1_220930	transcript=TGGT1_220930-t26_1 | gene=TGGT1_220930 | organism=Toxoplasma_gondii_GT1 | gene_product=hypothetical protein | transcript_product=hypothetical protein | location=TGGT1_chrII:53649-58945(-) | protein_length=687 | sequence_SO=chromosome | SO=protein_coding_gene | is_pseudo=false	0	FALSE	12.01	9	5	6	5	687	74	5.97	4.25	5	2.085	1.06	0.692726	712280	1.48533e+06	43.19	11.35	976433	519588	1.3705e+06	1.60978e+06	180041	59005.1	518396	1.60978e+06	Peak Found	Peak Found	High	High	1	Methylthio [C120]
TGGT1_286440	transcript=TGGT1_286440-t26_1 | gene=TGGT1_286440 | organism=Toxoplasma_gondii_GT1 | gene_product=Tudor domain-containing protein [Source:UniProtKB/TrEMBL;Acc:A0A125YY59] | transcript_product=malic enzyme | location=TGGT1_chrV:1681686-1685375(-) | protein_length=370 | sequence_SO=chromosome | SO=protein_coding_gene | is_pseudo=false	0	FALSE	13.304	19	6	7	6	370	41.8	5.62	3.57	6	2.077	1.05	0.699208	434452	902461	44.93	3.5	603750	312627	925051	880423	111324	35502.3	349903	880423	Peak Found	Peak Found	High	High	1	Methylthio [C134]
TGGT1_230850	transcript=TGGT1_230850-t26_1 | gene=TGGT1_230850 | organism=Toxoplasma_gondii_GT1 | gene_product=hypothetical protein | transcript_product=hypothetical protein | location=TGGT1_chrVIII:1056415-1058913(+) | protein_length=476 | sequence_SO=chromosome | SO=protein_coding_gene | is_pseudo=false	0	FALSE	33.697	28	10	16	10	476	50.5	8.25	14.78	10	2.067	1.05	0.704291	2.70997e+06	5.60204e+06	68.2	2.49	4.58544e+06	1.60157e+06	5.70158e+06	5.50425e+06	845495	181877	2.15664e+06	5.50425e+06	High	Peak Found	High	High	1	Methylthio [C240; C261]
TGGT1_246720	transcript=TGGT1_246720-t26_1 | gene=TGGT1_246720 | organism=Toxoplasma_gondii_GT1 | gene_product=hypothetical protein | transcript_product=hypothetical protein | location=TGGT1_chrXII:2874731-2876239(+) | protein_length=502 | sequence_SO=chromosome | SO=protein_coding_gene | is_pseudo=false	0	FALSE	12.303	13	6	6	6	502	55.9	5.47	3.5	6	2.067	1.05	0.704291	548778	1.1341e+06	77.72	4.29	1.0179e+06	295862	1.169e+06	1.10023e+06	187687	33598.4	442177	1.10023e+06	Peak Found	Peak Found	Peak Found	High	1	Methylthio [C188]
TGGT1_207990	transcript=TGGT1_207990-t26_1 | gene=TGGT1_207990 | organism=Toxoplasma_gondii_GT1 | gene_product=Putative rRNA methyltransferase [Source:UniProtKB/TrEMBL;Acc:A0A125YWK0] | transcript_product=ribosomal RNA large subunit methyltransferase J protein | location=TGGT1_chrIb:515897-524572(-) | protein_length=981 | sequence_SO=chromosome | SO=protein_coding_gene | is_pseudo=false	0.013	FALSE	2.033	1	1	1	1	981	109.4	7.05	0	1	2.063	1.04	0.704291	53762	110907	42.54	6.91	73331	39415.2	105613	116466	13521.3	4476.03	39948.5	116466	Peak Found	Peak Found	Peak Found	High	1
TGGT1_231630	transcript=TGGT1_231630-t26_1 | gene=TGGT1_231630 | organism=Toxoplasma_gondii_GT1 | gene_product=Alveolin domain containing intermediate filament IMC4 [Source:UniProtKB/TrEMBL;Acc:A0A125YPY9] | transcript_product=alveolin domain containing intermediate filament IMC4 | location=TGGT1_chrVIII:1508307-1510463(-) | protein_length=452 | sequence_SO=chromosome | SO=protein_coding_gene | is_pseudo=false	0	FALSE	48.116	30	9	43	9	452	50.1	5.95	54.35	9	2.049	1.04	0.711032	2.57697e+07	5.28143e+07	50.83	3.71	3.75409e+07	1.76894e+07	5.14471e+07	5.42179e+07	6.92205e+06	2.00883e+06	1.946e+07	5.42179e+07	High	High	High	High	1	Phospho [S32; S386; S390; S391; T395]
TGGT1_259260	transcript=TGGT1_259260-t26_1 | gene=TGGT1_259260 | organism=Toxoplasma_gondii_GT1 | gene_product=AAA domain-containing protein [Source:UniProtKB/TrEMBL;Acc:A0A125YKJ7] | transcript_product=membrane protein FtsH1 | location=TGGT1_chrVIIb:2788863-2795704(-) | protein_length=1250 | sequence_SO=chromosome | SO=protein_coding_gene | is_pseudo=false	0.012	FALSE	2.303	1	1	1	1	1250	136.9	7.11	0	1	2.046	1.03	0.711032	47367.8	96933.2	32.03	5.41	37616	59647.5	100712	93296.3	6935.9	6773.65	38094.5	93296.3	Peak Found	Peak Found	Peak Found	High	1
TGGT1_310860	transcript=TGGT1_310860-t26_1 | gene=TGGT1_310860 | organism=Toxoplasma_gondii_GT1 | gene_product=WD_REPEATS_REGION domain-containing protein [Source:UniProtKB/TrEMBL;Acc:S7W8Z8] | transcript_product=U5 snRNP-specific protein | location=TGGT1_chrXI:1594627-1600244(-) | protein_length=367 | sequence_SO=chromosome | SO=protein_coding_gene | is_pseudo=false	0	FALSE	5.377	11	2	4	2	367	39.2	6.19	2.06	2	2.042	1.03	0.711493	246756	503905	63.92	1.3	401639	151601	508548	499304	74056.9	17216	192359	499304	Peak Found	Peak Found	High	High	1	Methylthio [C344]
TGGT1_270250	transcript=TGGT1_270250-t26_1 | gene=TGGT1_270250 | organism=Toxoplasma_gondii_GT1 | gene_product=Dense granule protein GRA1 [Source:UniProtKB/TrEMBL;Acc:A0A125YRV6] | transcript_product=dense granule protein GRA1 | location=TGGT1_chrVIII:5308049-5308756(-) | protein_length=190 | sequence_SO=chromosome | SO=protein_coding_gene | is_pseudo=false	0	FALSE	6.735	15	3	5	3	190	20.1	4.28	8.23	3	2.032	1.02	0.719882	831058	1.68861e+06	75.39	20.63	1.50595e+06	458620	1.45786e+06	1.95588e+06	277677	52081.4	551441	1.95588e+06	High	Peak Found	High	High	1
TGGT1_308020	transcript=TGGT1_308020-t26_1 | gene=TGGT1_308020 | organism=Toxoplasma_gondii_GT1 | gene_product=SAG-related sequence SRS57 [Source:UniProtKB/TrEMBL;Acc:A0A125YU72] | transcript_product=SAG-related sequence SRS57 | location=TGGT1_chrXII:456740-457897(-) | protein_length=385 | sequence_SO=chromosome | SO=protein_coding_gene | is_pseudo=false	0	FALSE	17.253	21	6	14	6	385	41.7	7.14	19.26	6	2.032	1.02	0.719882	3.47876e+06	7.06729e+06	25.03	4.12	4.16003e+06	2.90906e+06	7.2764e+06	6.8642e+06	767055	330357	2.75232e+06	6.8642e+06	High	Peak Found	High	High	1	Methylthio [C97; C212]
TGGT1_311230	transcript=TGGT1_311230-t26_1 | gene=TGGT1_311230 | organism=Toxoplasma_gondii_GT1 | gene_product=hypothetical protein | transcript_product=hypothetical protein | location=TGGT1_chrXI:1844321-1862670(+) | protein_length=4603 | sequence_SO=chromosome | SO=protein_coding_gene | is_pseudo=false	0	FALSE	80.994	10	29	49	29	4603	494.5	4.88	41.48	29	2.015	1.01	0.731261	6.56101e+06	1.32197e+07	55.19	2.7	9.90736e+06	4.34493e+06	1.34742e+07	1.29699e+07	1.82679e+06	493416	5.09666e+06	1.29699e+07	High	Peak Found	High	High	1	Methylthio [C3210; C3246; C3374; C3444; C3447; C3614; C4462]
TGGT1_205250	transcript=TGGT1_205250-t26_1 | gene=TGGT1_205250 | organism=Toxoplasma_gondii_GT1 | gene_product=Protein kinase domain-containing protein [Source:UniProtKB/TrEMBL;Acc:A0A125YQA8] | transcript_product=rhoptry protein ROP18 | location=TGGT1_chrVIIa:1426782-1428446(-) | protein_length=554 | sequence_SO=chromosome | SO=protein_coding_gene | is_pseudo=false	0	FALSE	57.803	29	14	41	14	554	62.3	9.25	39.82	14	2.009	1.01	0.734014	2.0373e+07	4.0929e+07	5.89	1.07	1.95413e+07	2.124e+07	4.06202e+07	4.12402e+07	3.60317e+06	2.41204e+06	1.53647e+07	4.12402e+07	High	High	High	High	1	Methylthio [C198]
TGGT1_270560	transcript=TGGT1_270560-t26_1 | gene=TGGT1_270560 | organism=Toxoplasma_gondii_GT1 | gene_product=Peptidyl-prolyl cis-trans isomerase [Source:UniProtKB/TrEMBL;Acc:A0A125YV50] | transcript_product=peptidyl-prolyl cis-trans isomerase family 1 | location=TGGT1_chrVIII:5188031-5189216(+) | protein_length=195 | sequence_SO=chromosome | SO=protein_coding_gene | is_pseudo=false	0	FALSE	6.69	17	3	3	3	195	20.8	7.42	0	3	1.983	0.99	0.753063	336312	666754	34.13	3.26	430199	262915	651567	682294	79323.1	29856.9	246457	682294	Peak Found	Peak Found	Peak Found	High	1
TGGT1_315750	transcript=TGGT1_315750-t26_1 | gene=TGGT1_315750 | organism=Toxoplasma_gondii_GT1 | gene_product=hypothetical protein | transcript_product=hypothetical protein | location=TGGT1_chrXI:4888664-4890249(-) | protein_length=231 | sequence_SO=chromosome | SO=protein_coding_gene | is_pseudo=false	0	FALSE	18.092	33	5	12	5	231	25.7	5.14	22.6	5	1.982	0.99	0.753063	1.41593e+06	2.80675e+06	60.71	3.71	2.24067e+06	894753	2.73414e+06	2.88128e+06	413150	101609	1.0342e+06	2.88128e+06	High	Peak Found	High	High	1	Phospho [S24; S29; S42; S85]
TGGT1_209850	transcript=TGGT1_209850-t26_1 | gene=TGGT1_209850 | organism=Toxoplasma_gondii_GT1 | gene_product=RNA recognition motif-containing protein [Source:UniProtKB/TrEMBL;Acc:S7UJA3] | transcript_product=RNA recognition motif-containing protein | location=TGGT1_chrIb:1501964-1507671(-) | protein_length=1412 | sequence_SO=chromosome | SO=protein_coding_gene | is_pseudo=false	0	FALSE	8.657	3	4	5	4	1412	170.9	10.52	4.2	4	1.981	0.99	0.753063	842233	1.66823e+06	43.23	0.22	1.15499e+06	614167	1.67081e+06	1.66566e+06	212965	69745.5	631987	1.66566e+06	Peak Found	Peak Found	High	High	1	Methylthio [C283]
TGGT1_262070	transcript=TGGT1_262070-t26_1 | gene=TGGT1_262070 | organism=Toxoplasma_gondii_GT1 | gene_product=KRR1 small subunit processome component [Source:UniProtKB/TrEMBL;Acc:A0A125YI23] | transcript_product=putative ribosomal rna assembly protein mis3 | location=TGGT1_chrVIIb:1365066-1371076(-) | protein_length=394 | sequence_SO=chromosome | SO=protein_coding_gene | is_pseudo=false	0	FALSE	4.79	8	3	3	3	394	45.1	9.67	0	3	1.979	0.98	0.753063	309688	612765	47.01	2.47	437495	219217	623555	602161	80668.4	24894.6	235861	602161	Peak Found	Peak Found	High	High	1	Methylthio [C227]
TGGT1_218610	transcript=TGGT1_218610-t26_1 | gene=TGGT1_218610 | organism=Toxoplasma_gondii_GT1 | gene_product=RNA cytidine acetyltransferase [Source:UniProtKB/TrEMBL;Acc:S7V1W2] | transcript_product=ATPase (DUF699) protein | location=TGGT1_chrXII:1305454-1315334(-) | protein_length=1247 | sequence_SO=chromosome | SO=protein_coding_gene | is_pseudo=false	0	FALSE	10.725	5	5	6	5	1247	136.2	7.81	0	5	1.976	0.98	0.753063	364307	719775	58.01	13.81	563326	235600	652625	793836	103870	26755	246857	793836	Peak Found	Peak Found	High	High	1
TGGT1_264430	transcript=TGGT1_264430-t26_1 | gene=TGGT1_264430 | organism=Toxoplasma_gondii_GT1 | gene_product=hypothetical protein | transcript_product=hypothetical protein | location=TGGT1_chrIX:2067836-2071288(+) | protein_length=1151 | sequence_SO=chromosome | SO=protein_coding_gene | is_pseudo=false	0.003	FALSE	3.158	1	1	1	1	1151	118.5	8.1	0	1	1.976	0.98	0.753063	38764.2	76616.4	39.21	2.55	51533.3	29159.1	75248.6	78009.1	9502.06	3311.34	28463	78009.1	Peak Found	Peak Found	Peak Found	High	1
TGGT1_248700	transcript=TGGT1_248700-t26_1 | gene=TGGT1_248700 | organism=Toxoplasma_gondii_GT1 | gene_product=Alveolin domain containing intermediate filament IMC12 [Source:UniProtKB/TrEMBL;Acc:S7WGS9] | transcript_product=alveolin domain containing intermediate filament IMC12 | location=TGGT1_chrXII:4033434-4035280(+) | protein_length=277 | sequence_SO=chromosome | SO=protein_coding_gene | is_pseudo=false	0	FALSE	25.568	28	7	21	7	277	29.8	5.34	31.57	7	1.965	0.97	0.763934	8.73417e+06	1.71586e+07	62.65	3.53	1.40579e+07	5.42655e+06	1.67354e+07	1.75924e+07	2.59209e+06	616246	6.33022e+06	1.75924e+07	High	High	High	High	1	Phospho [S200]; Methylthio [C202]
TGGT1_313380	transcript=TGGT1_313380-t26_1 | gene=TGGT1_313380 | organism=Toxoplasma_gondii_GT1 | gene_product=hypothetical protein | transcript_product=hypothetical protein | location=TGGT1_chrXI:3292372-3294103(+) | protein_length=274 | sequence_SO=chromosome | SO=protein_coding_gene | is_pseudo=false	0	FALSE	44.096	46	10	40	10	274	31.5	5.58	48.48	10	1.96	0.97	0.763934	1.79773e+07	3.52407e+07	67.57	5.02	3.02418e+07	1.06867e+07	3.40112e+07	3.65146e+07	5.57619e+06	1.21359e+06	1.28648e+07	3.65146e+07	High	Peak Found	High	High	1	Methylthio [C74; C119]
TGGT1_308870	transcript=TGGT1_308870-t26_1 | gene=TGGT1_308870 | organism=Toxoplasma_gondii_GT1 | gene_product=C3H1-type domain-containing protein [Source:UniProtKB/TrEMBL;Acc:S7US37] | transcript_product=hypothetical protein | location=TGGT1_chrXI:276950-282861(+) | protein_length=693 | sequence_SO=chromosome | SO=protein_coding_gene | is_pseudo=false	0	FALSE	11.07	8	5	5	5	693	75	7.99	5.45	5	1.954	0.97	0.769489	488718	955126	20.97	24.43	420898	567466	802164	1.13726e+06	77608.1	64442.2	303421	1.13726e+06	Peak Found	Peak Found	High	High	1
TGGT1_253140	transcript=TGGT1_253140-t26_1 | gene=TGGT1_253140 | organism=Toxoplasma_gondii_GT1 | gene_product=hypothetical protein | transcript_product=hypothetical protein | location=TGGT1_chrIII:753985-759307(-) | protein_length=1519 | sequence_SO=chromosome | SO=protein_coding_gene | is_pseudo=false	0.003	FALSE	3.004	1	1	1	1	1519	164.6	9.61	0	1	1.946	0.96	0.774938	59746.5	116253	NA	11.9	59746.5	NA	106853	126480	11016.5	NA	40417.6	126480	Peak Found	Not Found	Peak Found	High	1
TGGT1_308860	transcript=TGGT1_308860-t26_1 | gene=TGGT1_308860 | organism=Toxoplasma_gondii_GT1 | gene_product=hypothetical protein | transcript_product=hypothetical protein | location=TGGT1_chrXI:267813-271388(-) | protein_length=654 | sequence_SO=chromosome | SO=protein_coding_gene | is_pseudo=false	0	FALSE	26.127	20	9	19	9	654	69.5	10.01	35.38	9	1.945	0.96	0.774938	5.75715e+06	1.11973e+07	56.37	1.1	8.77945e+06	3.77527e+06	1.11108e+07	1.12844e+07	1.61882e+06	428724	4.2027e+06	1.12844e+07	High	High	High	High	1	Methylthio [C164]
TGGT1_214220	transcript=TGGT1_214220-t26_1 | gene=TGGT1_214220 | organism=Toxoplasma_gondii_GT1 | gene_product=hypothetical protein | transcript_product=hypothetical protein | location=TGGT1_chrX:6010193-6012510(+) | protein_length=212 | sequence_SO=chromosome | SO=protein_coding_gene | is_pseudo=false	0	FALSE	6.367	17	2	2	2	212	23.4	9.83	0	2	1.938	0.95	0.781355	313681	607797	35.2	34.7	404483	243262	473112	780825	74581.4	27625.2	178956	780825	Peak Found	Peak Found	Peak Found	High	1
TGGT1_232830	transcript=TGGT1_232830-t26_1 | gene=TGGT1_232830 | organism=Toxoplasma_gondii_GT1 | gene_product=V-type proton ATPase subunit a [Source:UniProtKB/TrEMBL;Acc:S7WBT9] | transcript_product=putative vacuolar proton translocating ATPase subunit A | location=TGGT1_chrVIII:2275918-2280585(-) | protein_length=909 | sequence_SO=chromosome | SO=protein_coding_gene | is_pseudo=false	0	FALSE	23.524	13	9	11	9	909	101.1	5.35	6.25	9	1.937	0.95	0.781355	1.66286e+06	3.22042e+06	57.93	1.6	2.56954e+06	1.07611e+06	3.25706e+06	3.1842e+06	473790	122205	1.23199e+06	3.1842e+06	Peak Found	Peak Found	High	High	1	Methylthio [C26]
TGGT1_263520	transcript=TGGT1_263520-t26_1 | gene=TGGT1_263520 | organism=Toxoplasma_gondii_GT1 | gene_product=Microtubule associated protein SPM1 [Source:UniProtKB/TrEMBL;Acc:S7UXQ8] | transcript_product=microtubule associated protein SPM1 | location=TGGT1_chrVIIb:473105-475119(+) | protein_length=351 | sequence_SO=chromosome | SO=protein_coding_gene | is_pseudo=false	0	FALSE	46.844	44	12	47	12	351	38.7	7.9	58.07	12	1.929	0.95	0.784866	8.0201e+06	1.54685e+07	59.23	0.25	1.2531e+07	5.13303e+06	1.54409e+07	1.54962e+07	2.31055e+06	582913	5.84055e+06	1.54962e+07	High	Peak Found	High	High	1	Methylthio [C43; C44; C246; C323]
TGGT1_216000	transcript=TGGT1_216000-t26_1 | gene=TGGT1_216000 | organism=Toxoplasma_gondii_GT1 | gene_product=Alveolin domain containing intermediate filament IMC3 [Source:UniProtKB/TrEMBL;Acc:A0A125YIN0] | transcript_product=alveolin domain containing intermediate filament IMC3 | location=TGGT1_chrXI:6395592-6397208(+) | protein_length=538 | sequence_SO=chromosome | SO=protein_coding_gene | is_pseudo=false	0	FALSE	46.467	28	9	41	9	538	58	5.34	100.33	9	1.927	0.95	0.784866	1.54445e+07	2.97564e+07	71.08	12.86	2.68432e+07	8.88613e+06	2.71624e+07	3.25981e+07	4.94954e+06	1.00912e+06	1.02743e+07	3.25981e+07	High	High	High	High	1	Phospho [S338; S341]; Methylthio [C521]
TGGT1_220270	transcript=TGGT1_220270-t26_1 | gene=TGGT1_220270 | organism=Toxoplasma_gondii_GT1 | gene_product=Alveolin domain containing intermediate filament IMC6 [Source:UniProtKB/TrEMBL;Acc:S7VPD3] | transcript_product=alveolin domain containing intermediate filament IMC6 | location=TGGT1_chrV:152699-154033(-) | protein_length=444 | sequence_SO=chromosome | SO=protein_coding_gene | is_pseudo=false	0	FALSE	41.551	48	12	28	12	444	48.6	5.1	48.28	12	1.925	0.95	0.784866	1.14015e+07	2.19513e+07	58.58	0.31	1.77159e+07	7.33773e+06	2.19987e+07	2.1904e+07	3.26658e+06	833281	8.32105e+06	2.1904e+07	High	High	High	High	1	Methylthio [C89; C90; C125; C294]; Phospho [T406]
TGGT1_316340	transcript=TGGT1_316340-t26_1 | gene=TGGT1_316340 | organism=Toxoplasma_gondii_GT1 | gene_product=hypothetical protein | transcript_product=hypothetical protein | location=TGGT1_chrXI:5191484-5192942(+) | protein_length=243 | sequence_SO=chromosome | SO=protein_coding_gene | is_pseudo=false	0	FALSE	24.876	33	7	20	7	243	26.8	4.92	35.83	7	1.92	0.94	0.789266	6.58889e+06	1.26486e+07	59.9	4.86	1.03544e+07	4.19278e+06	1.22215e+07	1.30906e+07	1.90921e+06	476137	4.62282e+06	1.30906e+07	High	High	High	High	1	Phospho [S55]
TGGT1_253470	transcript=TGGT1_253470-t26_1 | gene=TGGT1_253470 | organism=Toxoplasma_gondii_GT1 | gene_product=Alveolin domain containing intermediate filament IMC13 [Source:UniProtKB/TrEMBL;Acc:A0A125YG71] | transcript_product=alveolin domain containing intermediate filament IMC13 | location=TGGT1_chrIII:956404-958611(+) | protein_length=398 | sequence_SO=chromosome | SO=protein_coding_gene | is_pseudo=false	0	FALSE	7.306	8	3	4	3	398	45.8	5.1	3.96	3	1.915	0.94	0.78967	762915	1.46109e+06	53.25	5.83	1.1336e+06	513444	1.52259e+06	1.40207e+06	209021	58307.3	575922	1.40207e+06	High	Peak Found	Peak Found	High	1
TGGT1_315490	transcript=TGGT1_315490-t26_1 | gene=TGGT1_315490 | organism=Toxoplasma_gondii_GT1 | gene_product=Rhoptry protein ROP10 [Source:UniProtKB/TrEMBL;Acc:S7VV52] | transcript_product=rhoptry protein ROP10 | location=TGGT1_chrXI:4696632-4698392(-) | protein_length=586 | sequence_SO=chromosome | SO=protein_coding_gene | is_pseudo=false	0	FALSE	19.685	20	7	8	7	586	60.8	4.32	4.69	7	1.915	0.94	0.78967	1.87575e+06	3.59179e+06	73.58	0.89	3.33914e+06	1.0537e+06	3.61451e+06	3.56921e+06	615694	119659	1.3672e+06	3.56921e+06	Peak Found	Peak Found	High	High	1
TGGT1_203290	transcript=TGGT1_203290-t26_1 | gene=TGGT1_203290 | organism=Toxoplasma_gondii_GT1 | gene_product=hypothetical protein | transcript_product=hypothetical protein | location=TGGT1_chrVIIa:2516966-2517958(-) | protein_length=330 | sequence_SO=chromosome | SO=protein_coding_gene | is_pseudo=false	0.002	FALSE	4.182	6	2	2	2	330	35.9	9.11	0	2	1.906	0.93	0.796256	183026	348852	1.61	9.53	180955	185121	326076	373219	33365.8	21022.5	123339	373219	Peak Found	Peak Found	Peak Found	High	1	Methylthio [C221]
TGGT1_285950	transcript=TGGT1_285950-t26_1 | gene=TGGT1_285950 | organism=Toxoplasma_gondii_GT1 | gene_product=hypothetical protein | transcript_product=hypothetical protein | location=TGGT1_chrV:1971631-1977769(+) | protein_length=833 | sequence_SO=chromosome | SO=protein_coding_gene | is_pseudo=false	0	FALSE	4.536	3	2	2	2	833	91.1	8.43	1.72	2	1.905	0.93	0.796256	196506	374334	79.23	7.12	370144	104323	393682	355936	68249.6	11847	148911	355936	Peak Found	Peak Found	High	High	1
TGGT1_286230	transcript=TGGT1_286230-t26_1 | gene=TGGT1_286230 | organism=Toxoplasma_gondii_GT1 | gene_product=hypothetical protein | transcript_product=hypothetical protein | location=TGGT1_chrV:1753645-1764533(-) | protein_length=2622 | sequence_SO=chromosome | SO=protein_coding_gene | is_pseudo=false	0	FALSE	13.485	3	7	8	7	2622	279.2	5.66	0	7	1.9	0.93	0.800932	498960	947801	50.63	2.56	725716	343056	930779	965135	133813	38957.9	352069	965135	Peak Found	Peak Found	High	High	1
TGGT1_225690	transcript=TGGT1_225690-t26_1 | gene=TGGT1_225690 | organism=Toxoplasma_gondii_GT1 | gene_product=hypothetical protein | transcript_product=hypothetical protein | location=TGGT1_chrX:2025685-2031135(+) | protein_length=1816 | sequence_SO=chromosome | SO=protein_coding_gene | is_pseudo=false	0	FALSE	29.557	9	13	14	13	1816	194	6.13	7.38	13	1.896	0.92	0.800932	1.92607e+06	3.65112e+06	47.3	2.18	2.72742e+06	1.36016e+06	3.70785e+06	3.59525e+06	502901	154462	1.4025e+06	3.59525e+06	Peak Found	Peak Found	High	High	1
TGGT1_261520	transcript=TGGT1_261520-t26_1 | gene=TGGT1_261520 | organism=Toxoplasma_gondii_GT1 | gene_product=OBG-type G domain-containing protein [Source:UniProtKB/TrEMBL;Acc:S7UYA0] | transcript_product=putative nucleolar GTP-binding protein 1 | location=TGGT1_chrVIIb:1646922-1654757(-) | protein_length=719 | sequence_SO=chromosome | SO=protein_coding_gene | is_pseudo=false	0.013	FALSE	2.198	1	1	1	1	719	80.9	9.7	0	1	1.891	0.92	0.800932	79730.5	150743	40.86	1.29	107346	59219.4	149377	152121	19793.2	6725.02	56502.2	152121	Peak Found	Peak Found	Peak Found	High	1
TGGT1_205010	transcript=TGGT1_205010-t26_1 | gene=TGGT1_205010 | organism=Toxoplasma_gondii_GT1 | gene_product=SF3b1 domain-containing protein [Source:UniProtKB/TrEMBL;Acc:S7UUF2] | transcript_product=putative U2 small nuclear ribonucleoprotein family protein | location=TGGT1_chrVIIa:1582142-1590578(-) | protein_length=1386 | sequence_SO=chromosome | SO=protein_coding_gene | is_pseudo=false	0	FALSE	12.676	6	5	6	5	1386	150.7	5.95	4.53	5	1.889	0.92	0.800932	260378	491856	106.09	31.17	689144	98377.9	393108	615410	127069	11171.9	148694	615410	High	Peak Found	Peak Found	High	1	Phospho [S118]
TGGT1_213030	transcript=TGGT1_213030-t26_1 | gene=TGGT1_213030 | organism=Toxoplasma_gondii_GT1 | gene_product=Clathrin light chain [Source:UniProtKB/TrEMBL;Acc:S7UPA7] | transcript_product=hypothetical protein | location=TGGT1_chrV:673145-674534(+) | protein_length=324 | sequence_SO=chromosome | SO=protein_coding_gene | is_pseudo=false	0	FALSE	10.59	19	5	6	5	324	35.2	4.69	7.64	5	1.888	0.92	0.800932	1.00115e+06	1.89022e+06	37.47	16.85	1.31333e+06	763169	1.67692e+06	2.13064e+06	242161	86666.4	634301	2.13064e+06	Peak Found	Peak Found	High	High	1
TGGT1_219320	transcript=TGGT1_219320-t26_1 | gene=TGGT1_219320 | organism=Toxoplasma_gondii_GT1 | gene_product=Acid phosphatase GAP50 [Source:UniProtKB/TrEMBL;Acc:S7V1S3] | transcript_product=acid phosphatase GAP50 | location=TGGT1_chrXII:907511-910397(-) | protein_length=431 | sequence_SO=chromosome | SO=protein_coding_gene | is_pseudo=false	0	FALSE	28.868	26	9	29	9	431	46.6	6.95	54.11	9	1.886	0.92	0.801477	2.74926e+07	5.18508e+07	45.64	3.33	3.84216e+07	1.96723e+07	5.06442e+07	5.30861e+07	7.08445e+06	2.23401e+06	1.91563e+07	5.30861e+07	High	High	High	High	1
TGGT1_324600	transcript=TGGT1_324600-t26_1 | gene=TGGT1_324600 | organism=Toxoplasma_gondii_GT1 | gene_product=SHSP domain-containing protein [Source:UniProtKB/TrEMBL;Acc:S7V3T7] | transcript_product=heat shock protein | location=TGGT1_chrVIII:2284363-2285174(-) | protein_length=185 | sequence_SO=chromosome | SO=protein_coding_gene | is_pseudo=false	0	FALSE	39.269	55	9	56	9	185	20.3	5.44	110.19	9	1.879	0.91	0.808748	4.94756e+07	9.29735e+07	49.37	2.14	7.12281e+07	3.43662e+07	9.43928e+07	9.15756e+07	1.31335e+07	3.90267e+06	3.57043e+07	9.15756e+07	High	High	High	High	1	Methylthio [C160]
TGGT1_249850	transcript=TGGT1_249850-t26_1 | gene=TGGT1_249850 | organism=Toxoplasma_gondii_GT1 | gene_product=GAP40 protein [Source:UniProtKB/TrEMBL;Acc:A0A125YP05] | transcript_product=GAP40 protein | location=TGGT1_chrXII:4837577-4838852(+) | protein_length=385 | sequence_SO=chromosome | SO=protein_coding_gene | is_pseudo=false	0	FALSE	15.06	23	5	12	5	385	43.1	6.62	17.97	5	1.875	0.91	0.812449	5.78671e+06	1.08496e+07	62.35	15.12	9.28971e+06	3.60463e+06	9.7454e+06	1.20788e+07	1.7129e+06	409347	3.68622e+06	1.20788e+07	High	High	High	High	1	Phospho [S355; S357]; Methylthio [C143; C318; C378]
TGGT1_258470	transcript=TGGT1_258470-t26_1 | gene=TGGT1_258470 | organism=Toxoplasma_gondii_GT1 | gene_product=hypothetical protein | transcript_product=hypothetical protein | location=TGGT1_chrVIIb:3369823-3371292(+) | protein_length=284 | sequence_SO=chromosome | SO=protein_coding_gene | is_pseudo=false	0	FALSE	16.338	24	5	10	5	284	31.7	7.8	14.92	5	1.865	0.9	0.818964	3.92501e+06	7.32174e+06	50.85	1.25	5.71884e+06	2.69386e+06	7.38678e+06	7.25728e+06	1.05448e+06	305917	2.79407e+06	7.25728e+06	High	High	High	High	1
TGGT1_202550	transcript=TGGT1_202550-t26_1 | gene=TGGT1_202550 | organism=Toxoplasma_gondii_GT1 | gene_product=FCP1 homology domain-containing protein [Source:UniProtKB/TrEMBL;Acc:S7UV08] | transcript_product=NLI interacting factor family phosphatase | location=TGGT1_chrVIIa:3125453-3133382(+) | protein_length=2212 | sequence_SO=chromosome | SO=protein_coding_gene | is_pseudo=false	0	FALSE	4.771	1	2	3	2	2212	232.8	6.96	0	2	1.864	0.9	0.818964	163852	305340	65.59	4.29	270715	99172.4	296214	314748	49916.3	11262.1	112044	314748	High	Peak Found	Peak Found	High	1
TGGT1_232130	transcript=TGGT1_232130-t26_1 | gene=TGGT1_232130 | organism=Toxoplasma_gondii_GT1 | gene_product=hypothetical protein | transcript_product=hypothetical protein | location=TGGT1_chrVIII:1876792-1879382(+) | protein_length=456 | sequence_SO=chromosome | SO=protein_coding_gene | is_pseudo=false	0	FALSE	48.493	50	15	42	15	456	48.8	9.91	73.71	15	1.863	0.9	0.818964	1.17815e+07	2.19499e+07	54.22	5.77	1.76465e+07	7.86575e+06	2.10722e+07	2.28643e+07	3.25379e+06	893244	7.9706e+06	2.28643e+07	High	High	High	High	1	Phospho [S209]
TGGT1_233410	transcript=TGGT1_233410-t26_1 | gene=TGGT1_233410 | organism=Toxoplasma_gondii_GT1 | gene_product=WD_REPEATS_REGION domain-containing protein [Source:UniProtKB/TrEMBL;Acc:S7WBZ2] | transcript_product=Sof1 family domain-containing protein | location=TGGT1_chrVIII:2626293-2633881(-) | protein_length=602 | sequence_SO=chromosome | SO=protein_coding_gene | is_pseudo=false	0.014	FALSE	1.976	2	1	1	1	602	67.9	9.54	0	1	1.851	0.89	0.828312	93557.8	173152	17.86	24.56	106224	82401.8	145290	206357	19586.3	9357.65	54956.2	206357	Peak Found	Peak Found	Peak Found	High	1
TGGT1_230210	transcript=TGGT1_230210-t26_1 | gene=TGGT1_230210 | organism=Toxoplasma_gondii_GT1 | gene_product=Alveolin domain containing intermediate filament IMC10 [Source:UniProtKB/TrEMBL;Acc:S7WBA5] | transcript_product=alveolin domain containing intermediate filament IMC10 | location=TGGT1_chrVIII:682439-685345(+) | protein_length=560 | sequence_SO=chromosome | SO=protein_coding_gene | is_pseudo=false	0	FALSE	31.091	27	10	21	10	560	61.1	4.79	33.68	10	1.844	0.88	0.82868	9.27367e+06	1.70974e+07	44.62	2.8	1.28565e+07	6.6893e+06	1.74389e+07	1.67626e+07	2.37057e+06	759645	6.59631e+06	1.67626e+07	High	Peak Found	High	High	1	Methylthio [C204]
TGGT1_235930	transcript=TGGT1_235930-t26_1 | gene=TGGT1_235930 | organism=Toxoplasma_gondii_GT1 | gene_product=Domain K-type RNA binding proteins family protein [Source:UniProtKB/TrEMBL;Acc:A0A125YQ53] | transcript_product=domain K- type RNA binding proteins family protein | location=TGGT1_chrX:5075263-5081044(+) | protein_length=570 | sequence_SO=chromosome | SO=protein_coding_gene | is_pseudo=false	0	FALSE	35.334	32	13	26	13	570	64.2	9.94	38.22	13	1.842	0.88	0.82868	6.69389e+06	1.23295e+07	51.43	13.76	9.79918e+06	4.57265e+06	1.11831e+07	1.35933e+07	1.80684e+06	519275	4.23004e+06	1.35933e+07	High	Peak Found	High	High	1	Methylthio [C362]
TGGT1_214880	transcript=TGGT1_214880-t26_1 | gene=TGGT1_214880 | organism=Toxoplasma_gondii_GT1 | gene_product=hypothetical protein | transcript_product=hypothetical protein | location=TGGT1_chrX:6454346-6458141(-) | protein_length=931 | sequence_SO=chromosome | SO=protein_coding_gene | is_pseudo=false	0	FALSE	26.703	17	11	12	11	931	98.1	7.24	7.13	11	1.837	0.88	0.82868	1.06102e+06	1.94871e+06	56.68	11.08	1.62227e+06	693938	1.80161e+06	2.10782e+06	299125	78804.5	681463	2.10782e+06	High	Peak Found	Peak Found	High	1	Methylthio [C512]
TGGT1_249030	transcript=TGGT1_249030-t26_1 | gene=TGGT1_249030 | organism=Toxoplasma_gondii_GT1 | gene_product=Endo/exonuclease/phosphatase domain-containing protein [Source:UniProtKB/TrEMBL;Acc:S7W971] | transcript_product=endonuclease/exonuclease/phosphatase family protein | location=TGGT1_chrXII:4253966-4255780(-) | protein_length=541 | sequence_SO=chromosome | SO=protein_coding_gene | is_pseudo=false	0.042	FALSE	1.466	3	1	1	1	541	60.2	8.02	0	1	1.836	0.88	0.82868	72306.6	132775	1.06	6.78	72851.5	71765.7	126552	139305	13432.9	8149.8	47868.7	139305	Peak Found	Peak Found	Peak Found	High	1
TGGT1_256030	transcript=TGGT1_256030-t26_1 | gene=TGGT1_256030 | organism=Toxoplasma_gondii_GT1 | gene_product=Doublecortin domain-containing protein [Source:UniProtKB/TrEMBL;Acc:A0A125YHL4] | transcript_product=hypothetical protein | location=TGGT1_chrVIIb:4469365-4470923(-) | protein_length=256 | sequence_SO=chromosome | SO=protein_coding_gene | is_pseudo=false	0	FALSE	12.514	25	6	8	6	256	29.2	8.84	1.88	6	1.835	0.88	0.82868	1.18734e+06	2.17936e+06	47.53	7.19	1.68436e+06	836985	2.29313e+06	2.07122e+06	310574	95049.1	867384	2.07122e+06	Peak Found	Peak Found	High	High	1
TGGT1_266450	transcript=TGGT1_266450-t26_1 | gene=TGGT1_266450 | organism=Toxoplasma_gondii_GT1 | gene_product=Lysine decarboxylase family protein [Source:UniProtKB/TrEMBL;Acc:A0A125YWB4] | transcript_product=lysine decarboxylase family protein | location=TGGT1_chrIX:949195-951504(+) | protein_length=361 | sequence_SO=chromosome | SO=protein_coding_gene | is_pseudo=false	0.025	FALSE	1.844	3	1	1	1	361	40.4	7.2	0	1	1.835	0.88	0.82868	1.3503e+06	2.47732e+06	6.13	4	1.29302e+06	1.41011e+06	2.40816e+06	2.54847e+06	238416	160134	910893	2.54847e+06	Peak Found	Peak Found	High	Peak Found	1
TGGT1_224130	transcript=TGGT1_224130-t26_1 | gene=TGGT1_224130 | organism=Toxoplasma_gondii_GT1 | gene_product=RRM domain-containing protein [Source:UniProtKB/TrEMBL;Acc:A0A125YI44] | transcript_product=hypothetical protein | location=TGGT1_chrX:3217756-3218599(-) | protein_length=154 | sequence_SO=chromosome | SO=protein_coding_gene | is_pseudo=false	0	FALSE	6.86	31	3	5	3	154	16.6	5.01	0	3	1.828	0.87	0.835199	876023	1.60154e+06	48.12	12.07	1.24865e+06	614599	1.47023e+06	1.74459e+06	230234	69794.6	556119	1.74459e+06	Peak Found	High	High	High	1
TGGT1_266960	transcript=TGGT1_266960-t26_1 | gene=TGGT1_266960 | organism=Toxoplasma_gondii_GT1 | gene_product=Tubulin beta chain [Source:UniProtKB/TrEMBL;Acc:A0A125YWG4] | transcript_product=beta-tubulin | location=TGGT1_chrIX:705551-707606(-) | protein_length=449 | sequence_SO=chromosome | SO=protein_coding_gene | is_pseudo=false	0	FALSE	91.406	65	21	117	7	449	50	4.81	195.08	21	1.827	0.87	0.835199	2.56305e+07	4.6823e+07	60.99	6.41	4.06596e+07	1.61567e+07	4.47463e+07	4.89961e+07	7.49709e+06	1.83478e+06	1.69254e+07	4.89961e+07	High	High	High	High	1	Methylthio [C12; C37; C238; C239; C301; C354]
TGGT1_230160	transcript=TGGT1_230160-t26_1 | gene=TGGT1_230160 | organism=Toxoplasma_gondii_GT1 | gene_product=hypothetical protein | transcript_product=hypothetical protein | location=TGGT1_chrVIII:647435-648305(-) | protein_length=142 | sequence_SO=chromosome | SO=protein_coding_gene | is_pseudo=false	0	FALSE	34.491	65	8	25	8	142	15.8	6.18	34.9	8	1.822	0.87	0.837513	1.08716e+07	1.9806e+07	52.81	0.65	1.60955e+07	7.34322e+06	1.98979e+07	1.97145e+07	2.96779e+06	833905	7.52643e+06	1.97145e+07	High	Peak Found	High	High	1	Methylthio [C23]; Phospho [S5]
TGGT1_262935	transcript=TGGT1_262935-t26_1 | gene=TGGT1_262935 | organism=Toxoplasma_gondii_GT1 | gene_product=hypothetical protein | transcript_product=hypothetical protein | location=TGGT1_chrVIIb:884077-886490(-) | protein_length=681 | sequence_SO=chromosome | SO=protein_coding_gene | is_pseudo=false	0	FALSE	8.927	6	4	4	4	681	76.6	11.11	1.64	4	1.82	0.86	0.837513	234060	425960	44.94	5.54	325298	168412	409589	442987	59980.7	19125.1	154928	442987	Peak Found	Peak Found	Peak Found	High	1
TGGT1_270690	transcript=TGGT1_270690-t26_1 | gene=TGGT1_270690 | organism=Toxoplasma_gondii_GT1 | gene_product=Arginyl-tRNA synthetase [Source:UniProtKB/TrEMBL;Acc:A0A125YS10] | transcript_product=arginyl-tRNA synthetase | location=TGGT1_chrVIII:5067864-5080628(-) | protein_length=1174 | sequence_SO=chromosome | SO=protein_coding_gene | is_pseudo=false	0	FALSE	4.473	2	2	2	2	1174	130.2	6.58	0	2	1.819	0.86	0.837513	175953	319976	81.91	1.58	340871	90824.7	316414	323578	62852.2	10314.2	119684	323578	Peak Found	Peak Found	Peak Found	High	1
TGGT1_212290	transcript=TGGT1_212290-t26_1 | gene=TGGT1_212290 | organism=Toxoplasma_gondii_GT1 | gene_product=Ribosomal protein RPS19 [Source:UniProtKB/TrEMBL;Acc:S7UVX4] | transcript_product=ribosomal protein RPS19 | location=TGGT1_chrX:3845925-3847625(-) | protein_length=313 | sequence_SO=chromosome | SO=protein_coding_gene | is_pseudo=false	0	FALSE	6.019	8	2	3	2	313	34.9	8.68	4.66	2	1.811	0.86	0.8385	544289	985765	16.98	32.46	482411	614104	780324	1.24529e+06	88950.2	69738.4	295160	1.24529e+06	High	Peak Found	Peak Found	High	1
TGGT1_236910	transcript=TGGT1_236910-t26_1 | gene=TGGT1_236910 | organism=Toxoplasma_gondii_GT1 | gene_product=Putative U2 snRNP auxiliary factor [Source:UniProtKB/TrEMBL;Acc:A0A125YHP4] | transcript_product=putative U2 snRNP auxiliary factor | location=TGGT1_chrX:5461144-5462410(-) | protein_length=254 | sequence_SO=chromosome | SO=protein_coding_gene | is_pseudo=false	0.002	FALSE	4.16	7	2	2	2	254	29.5	8.98	2.25	2	1.811	0.86	0.8385	869679	1.57542e+06	0.32	3.45	867701	871661	1.53745e+06	1.61432e+06	159993	98986.9	581544	1.61432e+06	Peak Found	Peak Found	High	High	1	Methylthio [C163]
TGGT1_316540	transcript=TGGT1_316540-t26_1 | gene=TGGT1_316540 | organism=Toxoplasma_gondii_GT1 | gene_product=ISP1_C domain-containing protein [Source:UniProtKB/TrEMBL;Acc:A0A125YUT4] | transcript_product=IMC sub-compartment protein ISP3 | location=TGGT1_chrXI:5335579-5336073(-) | protein_length=164 | sequence_SO=chromosome | SO=protein_coding_gene | is_pseudo=false	0	FALSE	5.523	16	2	3	2	164	18.4	5.27	0	2	1.811	0.86	0.8385	182709	330816	6.02	20.13	175085	190666	286651	381785	32283.3	21652.3	108427	381785	Peak Found	Peak Found	High	High	1	Methylthio [C139]
TGGT1_223390	transcript=TGGT1_223390-t26_1 | gene=TGGT1_223390 | organism=Toxoplasma_gondii_GT1 | gene_product=Putative activating signal cointegrator 1 complex subunit 3 family 1 ASCC3L1 [Source:UniProtKB/TrEMBL;Acc:S7W4M7] | transcript_product=putative activating signal cointegrator 1 complex subunit 3 family 1 ASCC3L1 | location=TGGT1_chrX:3771178-3788152(+) | protein_length=2207 | sequence_SO=chromosome |…	0	FALSE	54.859	12	21	28	21	2207	248.3	6.32	19.59	21	1.808	0.85	0.838716	3.03345e+06	5.48525e+06	30.46	3.49	3.77554e+06	2.43722e+06	5.35154e+06	5.62231e+06	696160	276773	2.02423e+06	5.62231e+06	High	Peak Found	High	High	1
TGGT1_286580	transcript=TGGT1_286580-t26_1 | gene=TGGT1_286580 | organism=Toxoplasma_gondii_GT1 | gene_product=Hydrolase_4 domain-containing protein [Source:UniProtKB/TrEMBL;Acc:S7UP07] | transcript_product=hypothetical protein | location=TGGT1_chrV:1631039-1633906(-) | protein_length=955 | sequence_SO=chromosome | SO=protein_coding_gene | is_pseudo=false	0	FALSE	86.826	35	27	50	27	955	107.2	5.63	60.54	27	1.806	0.85	0.838716	1.57228e+07	2.83934e+07	53.82	6.26	2.34723e+07	1.05318e+07	2.71628e+07	2.96797e+07	4.32799e+06	1.196e+06	1.02744e+07	2.96797e+07	High	High	High	High	1	Methylthio [C270; C910]
TGGT1_223410	transcript=TGGT1_223410-t26_1 | gene=TGGT1_223410 | organism=Toxoplasma_gondii_GT1 | gene_product=Putative eukaryotic initiation factor-4E [Source:UniProtKB/TrEMBL;Acc:A0A125YS61] | transcript_product=putative eukaryotic initiation factor-4E | location=TGGT1_chrX:3763701-3766447(+) | protein_length=225 | sequence_SO=chromosome | SO=protein_coding_gene | is_pseudo=false	0.001	FALSE	3.592	10	2	2	2	225	26	6.24	0	2	1.804	0.85	0.838914	170688	307958	45.16	19.71	122596	237643	267643	354346	22605.2	26987.1	101237	354346	Peak Found	Peak Found	Peak Found	High	1
TGGT1_218600	transcript=TGGT1_218600-t26_1 | gene=TGGT1_218600 | organism=Toxoplasma_gondii_GT1 | gene_product=RRM domain-containing protein [Source:UniProtKB/TrEMBL;Acc:S7WHH5] | transcript_product=RNA recognition motif-containing protein | location=TGGT1_chrXII:1316835-1323130(+) | protein_length=752 | sequence_SO=chromosome | SO=protein_coding_gene | is_pseudo=false	0	FALSE	13.144	10	6	7	6	752	84.1	10.21	3.49	6	1.798	0.85	0.841291	560152	1.00717e+06	20.06	13.57	646125	485619	914734	1.10895e+06	119137	55147.5	346001	1.10895e+06	Peak Found	Peak Found	High	High	1
TGGT1_315210	transcript=TGGT1_315210-t26_1 | gene=TGGT1_315210 | organism=Toxoplasma_gondii_GT1 | gene_product=Putative rhoptry protein [Source:UniProtKB/TrEMBL;Acc:S7ULH8] | transcript_product=putative rhoptry protein | location=TGGT1_chrXI:4519390-4526736(-) | protein_length=1010 | sequence_SO=chromosome | SO=protein_coding_gene | is_pseudo=false	0.027	FALSE	1.808	1	1	2	1	1010	115.8	7.72	0	1	1.797	0.85	0.841291	100974	181405	47.35	17	143038	71279.3	204691	160768	26374.4	8094.57	77425	160768	Peak Found	Peak Found	High	High	1
TGGT1_260500	transcript=TGGT1_260500-t26_1 | gene=TGGT1_260500 | organism=Toxoplasma_gondii_GT1 | gene_product=Putative COPI associated protein [Source:UniProtKB/TrEMBL;Acc:A0A125YRK9] | transcript_product=putative COPI associated protein | location=TGGT1_chrVIIb:2175003-2177830(+) | protein_length=270 | sequence_SO=chromosome | SO=protein_coding_gene | is_pseudo=false	0	FALSE	5.243	13	3	3	3	270	29.9	8.63	1.67	3	1.792	0.84	0.844885	386552	692556	36.62	12.8	503831	296572	758341	632477	92899.9	33679.1	286845	632477	Peak Found	Peak Found	Peak Found	High	1	Methylthio [C224]
TGGT1_294790	transcript=TGGT1_294790-t26_1 | gene=TGGT1_294790 | organism=Toxoplasma_gondii_GT1 | gene_product=hypothetical protein | transcript_product=hypothetical protein | location=TGGT1_chrIa:1130567-1131622(-) | protein_length=351 | sequence_SO=chromosome | SO=protein_coding_gene | is_pseudo=false	0	FALSE	8.315	9	3	5	3	351	37.7	4.78	5.52	3	1.789	0.84	0.844885	1.19225e+06	2.1326e+06	36.28	9.32	1.55e+06	917071	2.27815e+06	1.99635e+06	285800	104144	861717	1.99635e+06	Peak Found	Peak Found	High	High	1
TGGT1_245640	transcript=TGGT1_245640-t26_1 | gene=TGGT1_245640 | organism=Toxoplasma_gondii_GT1 | gene_product=hypothetical protein | transcript_product=hypothetical protein | location=TGGT1_chrXII:2379517-2382152(-) | protein_length=416 | sequence_SO=chromosome | SO=protein_coding_gene | is_pseudo=false	0	FALSE	13.241	14	5	5	5	416	46.5	9.44	1.8	5	1.788	0.84	0.844885	452976	809905	80.95	18.25	868651	236214	711325	922147	160168	26824.7	269060	922147	Peak Found	Peak Found	Peak Found	High	1
TGGT1_250820	transcript=TGGT1_250820-t26_1 | gene=TGGT1_250820 | organism=Toxoplasma_gondii_GT1 | gene_product=hypothetical protein | transcript_product=hypothetical protein | location=TGGT1_chrXII:5170586-5175102(+) | protein_length=1156 | sequence_SO=chromosome | SO=protein_coding_gene | is_pseudo=false	0	FALSE	64.575	27	24	38	24	1156	120.8	9.25	46.95	24	1.785	0.84	0.844885	9.23222e+06	1.64811e+07	58.11	2.57	1.42871e+07	5.96578e+06	1.67829e+07	1.61847e+07	2.63436e+06	677481	6.34816e+06	1.61847e+07	High	High	High	High	1	Methylthio [C503; C618]
TGGT1_313990	transcript=TGGT1_313990-t26_1 | gene=TGGT1_313990 | organism=Toxoplasma_gondii_GT1 | gene_product=CBF domain-containing protein [Source:UniProtKB/TrEMBL;Acc:S7W9B0] | transcript_product=CBF/Mak21 family protein | location=TGGT1_chrXI:3822824-3831741(+) | protein_length=1361 | sequence_SO=chromosome | SO=protein_coding_gene | is_pseudo=false	0	FALSE	8.476	3	3	3	3	1361	148.8	7.53	1.69	3	1.78	0.83	0.849195	205593	366045	33.82	6.89	262371	161102	348613	384348	48377.8	18294.9	131864	384348	Peak Found	Peak Found	Peak Found	High	1
TGGT1_316900	transcript=TGGT1_316900-t26_1 | gene=TGGT1_316900 | organism=Toxoplasma_gondii_GT1 | gene_product=Sas10 domain-containing protein [Source:UniProtKB/TrEMBL;Acc:S7UL53] | transcript_product=Sas10 C-terminal domain-containing protein | location=TGGT1_chrXI:5539468-5546574(-) | protein_length=800 | sequence_SO=chromosome | SO=protein_coding_gene | is_pseudo=false	0	FALSE	15.831	13	6	6	6	800	90.5	5.21	2.49	6	1.779	0.83	0.849195	685494	1.2197e+06	66.93	18.34	1.14648e+06	409864	1.38957e+06	1.0706e+06	211396	46544.7	525608	1.0706e+06	Peak Found	Peak Found	Peak Found	High	1
TGGT1_271970	transcript=TGGT1_271970-t26_1 | gene=TGGT1_271970 | organism=Toxoplasma_gondii_GT1 | gene_product=Glideosome-associated protein with multiple-membrane spans GAPM3 [Source:UniProtKB/TrEMBL;Acc:A0A125YP90] | transcript_product=glideosome-associated protein with multiple-membrane spans GAPM3 | location=TGGT1_chrVIII:4254025-4255814(+) | protein_length=310 | sequence_SO=chromosome | SO=protein_coding…	0	FALSE	7.458	10	3	7	3	310	34.3	4.96	3.33	3	1.772	0.82	0.856813	9.57867e+06	1.69688e+07	47.14	9.61	1.35466e+07	6.77297e+06	1.58519e+07	1.81645e+07	2.49782e+06	769147	5.99602e+06	1.81645e+07	High	High	High	High	1
TGGT1_239760	transcript=TGGT1_239760-t26_1 | gene=TGGT1_239760 | organism=Toxoplasma_gondii_GT1 | gene_product=Ribosomal protein RPL22 [Source:UniProtKB/TrEMBL;Acc:A0A125YT45] | transcript_product=ribosomal protein RPL22 | location=TGGT1_chrVI:893982-895795(-) | protein_length=133 | sequence_SO=chromosome | SO=protein_coding_gene | is_pseudo=false	0.004	FALSE	2.653	8	1	1	1	133	15.1	9.89	1.6	1	1.77	0.82	0.856813	244882	433389	16.81	0.61	217315	275945	431515	435272	40070.1	31336.7	163222	435272	Peak Found	Peak Found	Peak Found	High	1
TGGT1_225890	transcript=TGGT1_225890-t26_1 | gene=TGGT1_225890 | organism=Toxoplasma_gondii_GT1 | gene_product=hypothetical protein | transcript_product=hypothetical protein | location=TGGT1_chrX:1864237-1871724(-) | protein_length=2111 | sequence_SO=chromosome | SO=protein_coding_gene | is_pseudo=false	0.013	FALSE	2.213	1	1	1	1	2111	222.9	9.67	0	1	1.765	0.82	0.859403	350048	617830	31.35	3.67	279408	438547	602016	634059	51519.2	49801.9	227714	634059	Peak Found	Peak Found	Peak Found	High	1
TGGT1_314750	transcript=TGGT1_314750-t26_1 | gene=TGGT1_314750 | organism=Toxoplasma_gondii_GT1 | gene_product=hypothetical protein | transcript_product=hypothetical protein | location=TGGT1_chrXI:4214855-4217243(-) | protein_length=469 | sequence_SO=chromosome | SO=protein_coding_gene | is_pseudo=false	0	FALSE	14.599	17	5	8	5	469	50	10.14	5.83	5	1.765	0.82	0.859403	714013	1.26058e+06	57.15	7.89	1.09599e+06	465163	1.19211e+06	1.33299e+06	202086	52824.4	450917	1.33299e+06	High	Peak Found	High	High	1	Methylthio [C106]
TGGT1_234390	transcript=TGGT1_234390-t26_1 | gene=TGGT1_234390 | organism=Toxoplasma_gondii_GT1 | gene_product=hypothetical protein | transcript_product=hypothetical protein | location=TGGT1_chrX:4229816-4231984(+) | protein_length=425 | sequence_SO=chromosome | SO=protein_coding_gene | is_pseudo=false	0.012	FALSE	2.236	3	1	1	1	425	45.8	9.79	0	1	1.764	0.82	0.859403	56079.2	98906.3	24.04	NA	66581.7	47233.4	NA	98906.3	12276.8	5363.88	NA	98906.3	Peak Found	Peak Found	Not Found	High	1	Methylthio [C71]
TGGT1_320210	transcript=TGGT1_320210-t26_1 | gene=TGGT1_320210 | organism=Toxoplasma_gondii_GT1 | gene_product=WD domain, G-beta repeat domain containing protein [Source:UniProtKB/TrEMBL;Acc:A0A125YIX6] | transcript_product=WD domain, G-beta repeat domain containing protein | location=TGGT1_chrIV:376406-380420(+) | protein_length=515 | sequence_SO=chromosome | SO=protein_coding_gene | is_pseudo=false	0	FALSE	11.19	11	4	6	4	515	56	7.46	6.64	4	1.759	0.81	0.86134	1.35051e+06	2.37566e+06	48.95	0.88	1.9377e+06	941260	2.36092e+06	2.39049e+06	357287	106891	893025	2.39049e+06	Peak Found	Peak Found	High	High	1
TGGT1_258458	transcript=TGGT1_258458-t26_1 | gene=TGGT1_258458 | organism=Toxoplasma_gondii_GT1 | gene_product=hypothetical protein | transcript_product=hypothetical protein | location=TGGT1_chrVIIb:3374079-3375548(-) | protein_length=260 | sequence_SO=chromosome | SO=protein_coding_gene | is_pseudo=false	0.032	FALSE	1.663	4	1	1	1	260	28.8	5.92	0	1	1.755	0.81	0.861499	75043.1	131706	38.38	7.27	56811.3	99125.9	138658	125103	10475.3	11256.9	52447.9	125103	Peak Found	Peak Found	Peak Found	High	1
TGGT1_210980	transcript=TGGT1_210980-t26_1 | gene=TGGT1_210980 | organism=Toxoplasma_gondii_GT1 | gene_product=Putative alternative splicing type 3 and [Source:UniProtKB/TrEMBL;Acc:S7UKQ1] | transcript_product=putative alternative splicing type 3 and | location=TGGT1_chrIV:1920085-1926796(-) | protein_length=554 | sequence_SO=chromosome | SO=protein_coding_gene | is_pseudo=false	0	FALSE	8.735	7	4	4	4	554	64.5	8	2.82	4	1.75	0.81	0.867594	813483	1.42327e+06	7.59	21.14	858372	770942	1.22431e+06	1.65457e+06	158273	87549.1	463099	1.65457e+06	Peak Found	Peak Found	Peak Found	High	1
TGGT1_292130	transcript=TGGT1_292130-t26_1 | gene=TGGT1_292130 | organism=Toxoplasma_gondii_GT1 | gene_product=Ribosomal protein RPL13A [Source:UniProtKB/TrEMBL;Acc:A0A125YU05] | transcript_product=ribosomal protein RPL13A | location=TGGT1_chrIX:4373947-4376715(-) | protein_length=286 | sequence_SO=chromosome | SO=protein_coding_gene | is_pseudo=false	0	FALSE	15.915	22	5	11	5	286	32.7	10.65	11.11	5	1.744	0.8	0.871864	2.72697e+06	4.75566e+06	12.13	0.79	2.97178e+06	2.50233e+06	4.7291e+06	4.78238e+06	547957	284168	1.78879e+06	4.78238e+06	Peak Found	High	High	High	1	Methylthio [C118; C121]
TGGT1_305050	transcript=TGGT1_305050-t26_1 | gene=TGGT1_305050 | organism=Toxoplasma_gondii_GT1 | gene_product=Putative calmodulin [Source:UniProtKB/TrEMBL;Acc:A0A125YT25] | transcript_product=putative calmodulin | location=TGGT1_chrIX:4983149-4983550(+) | protein_length=133 | sequence_SO=chromosome | SO=protein_coding_gene | is_pseudo=false	0	FALSE	12.707	48	5	7	5	133	15.3	5.05	5.77	5	1.744	0.8	0.871864	945864	1.64999e+06	27.29	25.16	1.15e+06	777961	1.37842e+06	1.97507e+06	212046	88346.2	521389	1.97507e+06	Peak Found	Peak Found	High	High	1	Methylthio [C100]
TGGT1_262150	transcript=TGGT1_262150-t26_1 | gene=TGGT1_262150 | organism=Toxoplasma_gondii_GT1 | gene_product=BTB_2 domain-containing protein [Source:UniProtKB/TrEMBL;Acc:S7WDW6] | transcript_product=kelch repeat and K+ channel tetramerisation domain containing protein | location=TGGT1_chrVIIb:1306190-1314039(-) | protein_length=818 | sequence_SO=chromosome | SO=protein_coding_gene | is_pseudo=false	0.001	FALSE	3.568	2	1	1	1	818	88.9	6.68	2.61	1	1.742	0.8	0.873249	87702	152742	49.09	9.68	125983	61053.2	142622	163580	23229.5	6933.27	53947.2	163580	Peak Found	Peak Found	Peak Found	High	1
TGGT1_238250	transcript=TGGT1_238250-t26_1 | gene=TGGT1_238250 | organism=Toxoplasma_gondii_GT1 | gene_product=60S ribosomal protein L36 [Source:UniProtKB/TrEMBL;Acc:A0A125YHS1] | transcript_product=ribosomal protein RPL36 | location=TGGT1_chrVI:154936-156110(+) | protein_length=101 | sequence_SO=chromosome | SO=protein_coding_gene | is_pseudo=false	0.002	FALSE	3.907	22	2	2	2	101	11.4	12.06	2.02	2	1.733	0.79	0.881642	769700	1.334e+06	4.97	4.19	743117	797233	1.29507e+06	1.37411e+06	137021	90534.7	489864	1.37411e+06	Peak Found	Peak Found	High	High	1
TGGT1_231640	transcript=TGGT1_231640-t26_1 | gene=TGGT1_231640 | organism=Toxoplasma_gondii_GT1 | gene_product=Alveolin domain containing intermediate filament IMC1 [Source:UniProtKB/TrEMBL;Acc:A0A125YFV6] | transcript_product=alveolin domain containing intermediate filament IMC1 | location=TGGT1_chrVIII:1511977-1514752(+) | protein_length=609 | sequence_SO=chromosome | SO=protein_coding_gene | is_pseudo=false	0	FALSE	61.196	37	16	66	16	609	69.6	5.19	103.24	16	1.732	0.79	0.881642	5.90657e+07	1.02294e+08	66.7	1.09	9.85755e+07	3.53917e+07	1.03084e+08	1.0151e+08	1.8176e+07	4.01912e+06	3.89916e+07	1.0151e+08	High	High	High	High	1	Methylthio [C5; C9; C12; C13; C389]; Phospho [S27]
TGGT1_301420	transcript=TGGT1_301420-t26_1 | gene=TGGT1_301420 | organism=Toxoplasma_gondii_GT1 | gene_product=SAS-6_N domain-containing protein [Source:UniProtKB/TrEMBL;Acc:S7UHP2] | transcript_product=hypothetical protein | location=TGGT1_chrIV:2353774-2357126(+) | protein_length=263 | sequence_SO=chromosome | SO=protein_coding_gene | is_pseudo=false	0	FALSE	16.191	26	5	8	5	263	29.5	6.73	10.42	5	1.729	0.79	0.882197	1.75169e+06	3.02875e+06	24.14	6.81	2.08123e+06	1.47433e+06	2.88621e+06	3.17832e+06	383752	167427	1.09172e+06	3.17832e+06	High	Peak Found	High	High	1
TGGT1_286590	transcript=TGGT1_286590-t26_1 | gene=TGGT1_286590 | organism=Toxoplasma_gondii_GT1 | gene_product=Microtubule associated protein SPM2 [Source:UniProtKB/TrEMBL;Acc:S7VWS9] | transcript_product=microtubule associated protein SPM2 | location=TGGT1_chrV:1625039-1626577(+) | protein_length=357 | sequence_SO=chromosome | SO=protein_coding_gene | is_pseudo=false	0	FALSE	27.736	30	11	19	11	357	39.6	9.92	12.52	11	1.728	0.79	0.882197	5.28292e+06	9.12628e+06	63.04	0.19	8.53216e+06	3.27106e+06	9.11414e+06	9.13843e+06	1.57322e+06	371466	3.44745e+06	9.13843e+06	High	Peak Found	High	High	1	Methylthio [C30; C83; C296]
TGGT1_271050	transcript=TGGT1_271050-t26_1 | gene=TGGT1_271050 | organism=Toxoplasma_gondii_GT1 | gene_product=SAG domain-containing protein [Source:UniProtKB/TrEMBL;Acc:A0A125YVU5] | transcript_product=SAG-related sequence SRS34A | location=TGGT1_chrVIII:4754604-4755164(+) | protein_length=186 | sequence_SO=chromosome | SO=protein_coding_gene | is_pseudo=false	0	FALSE	15.11	31	5	22	5	186	19	7.97	36.78	5	1.727	0.79	0.882197	4.05066e+07	6.99431e+07	42.85	24	5.53841e+07	2.96256e+07	8.3015e+07	5.89296e+07	1.02121e+07	3.36432e+06	3.14006e+07	5.89296e+07	High	High	High	High	1	Methylthio [C57; C124]
TGGT1_237180	transcript=TGGT1_237180-t26_1 | gene=TGGT1_237180 | organism=Toxoplasma_gondii_GT1 | gene_product=hypothetical protein | transcript_product=hypothetical protein | location=TGGT1_chrX:5659103-5659870(-) | protein_length=255 | sequence_SO=chromosome | SO=protein_coding_gene | is_pseudo=false	0	FALSE	11.126	16	4	6	4	255	29.2	8.97	4.14	4	1.723	0.79	0.882197	1.22245e+06	2.10639e+06	33.03	17.56	1.55084e+06	963596	1.85923e+06	2.3864e+06	285954	109427	703260	2.3864e+06	High	Peak Found	High	High	1
TGGT1_225560	transcript=TGGT1_225560-t26_1 | gene=TGGT1_225560 | organism=Toxoplasma_gondii_GT1 | gene_product=hypothetical protein | transcript_product=hypothetical protein | location=TGGT1_chrX:2061073-2067167(-) | protein_length=1116 | sequence_SO=chromosome | SO=protein_coding_gene | is_pseudo=false	0	FALSE	5.822	4	3	3	3	1116	123.6	6.77	0	3	1.721	0.78	0.883013	298994	514524	NA	6.84	298994	NA	490200	540055	55130.5	NA	185420	540055	Peak Found	Not Found	High	High	1
TGGT1_233460	transcript=TGGT1_233460-t26_1 | gene=TGGT1_233460 | organism=Toxoplasma_gondii_GT1 | gene_product=SAG-related sequence SRS29B [Source:UniProtKB/TrEMBL;Acc:A0A125YG48] | transcript_product=SAG-related sequence SRS29B | location=TGGT1_chrVIII:2660455-2661465(+) | protein_length=336 | sequence_SO=chromosome | SO=protein_coding_gene | is_pseudo=false	0	FALSE	59.511	49	12	72	12	336	34.8	8.02	155.56	12	1.718	0.78	0.883013	1.59188e+08	2.73529e+08	30.74	4	1.98537e+08	1.27638e+08	2.81378e+08	2.65898e+08	3.66077e+07	1.44947e+07	1.06432e+08	2.65898e+08	High	High	High	High	1	Methylthio [C102; C110; C161; C190; C215; C285]
TGGT1_259630	transcript=TGGT1_259630-t26_1 | gene=TGGT1_259630 | organism=Toxoplasma_gondii_GT1 | gene_product=hypothetical protein | transcript_product=hypothetical protein | location=TGGT1_chrVIIb:2722823-2724032(+) | protein_length=160 | sequence_SO=chromosome | SO=protein_coding_gene | is_pseudo=false	0	FALSE	20.014	40	4	13	4	160	18.3	5.1	27.22	4	1.716	0.78	0.883013	5.75929e+06	9.88567e+06	52.48	3.84	8.50367e+06	3.9006e+06	9.62063e+06	1.0158e+07	1.56797e+06	442956	3.63903e+06	1.0158e+07	High	High	High	High	1	Phospho [T27]
TGGT1_230940	transcript=TGGT1_230940-t26_1 | gene=TGGT1_230940 | organism=Toxoplasma_gondii_GT1 | gene_product=hypothetical protein | transcript_product=hypothetical protein | location=TGGT1_chrVIII:1112065-1119747(+) | protein_length=1523 | sequence_SO=chromosome | SO=protein_coding_gene | is_pseudo=false	0	FALSE	43.111	16	15	18	15	1523	155.1	9.44	13.1	15	1.714	0.78	0.883013	2.52388e+06	4.32698e+06	24.06	13.11	2.997e+06	2.12545e+06	3.94277e+06	4.74862e+06	552607	241369	1.49136e+06	4.74862e+06	High	High	High	High	1
TGGT1_246950	transcript=TGGT1_246950-t26_1 | gene=TGGT1_246950 | organism=Toxoplasma_gondii_GT1 | gene_product=hypothetical protein | transcript_product=hypothetical protein | location=TGGT1_chrXII:2962303-2964193(-) | protein_length=452 | sequence_SO=chromosome | SO=protein_coding_gene | is_pseudo=false	0	FALSE	5.59	11	3	3	3	452	48.6	8.87	1.84	3	1.708	0.77	0.889002	347881	594056	25.41	3.18	417170	290100	580855	607557	76920.7	32944.1	219710	607557	Peak Found	Peak Found	Peak Found	High	1
TGGT1_267500	transcript=TGGT1_267500-t26_1 | gene=TGGT1_267500 | organism=Toxoplasma_gondii_GT1 | gene_product=hypothetical protein | transcript_product=hypothetical protein | location=TGGT1_chrIX:444584-445921(+) | protein_length=230 | sequence_SO=chromosome | SO=protein_coding_gene | is_pseudo=false	0	FALSE	7.312	13	3	8	3	230	25.7	6.95	10.06	3	1.706	0.77	0.889571	3.325e+06	5.67215e+06	53.69	3	4.95864e+06	2.22957e+06	5.55317e+06	5.79367e+06	914308	253193	2.1005e+06	5.79367e+06	High	High	High	High	1
TGGT1_226910	transcript=TGGT1_226910-t26_1 | gene=TGGT1_226910 | organism=Toxoplasma_gondii_GT1 | gene_product=Amylo-alpha-1,6-glucosidase [Source:UniProtKB/TrEMBL;Acc:S7UWU6] | transcript_product=Amylo-alpha-1,6-glucosidase | location=TGGT1_chrX:1136138-1153007(-) | protein_length=1882 | sequence_SO=chromosome | SO=protein_coding_gene | is_pseudo=false	0	FALSE	5.693	2	3	3	3	1882	207.9	6.58	1.6	3	1.703	0.77	0.891796	208908	355794	29.31	2.83	257811	169282	362978	348752	47536.9	19223.9	137298	348752	Peak Found	Peak Found	Peak Found	High	1	Methylthio [C741]
TGGT1_212310	transcript=TGGT1_212310-t26_1 | gene=TGGT1_212310 | organism=Toxoplasma_gondii_GT1 | gene_product=V-type proton ATPase proteolipid subunit [Source:UniProtKB/TrEMBL;Acc:S7WBL3] | transcript_product=vacuolar ATP synthetase | location=TGGT1_chrX:3830850-3833361(-) | protein_length=170 | sequence_SO=chromosome | SO=protein_coding_gene | is_pseudo=false	0.003	FALSE	2.998	5	1	2	1	170	17.5	7.96	1.76	1	1.701	0.77	0.893169	604578	1.02831e+06	21.58	28.01	705086	518396	1.25685e+06	841318	130009	58869.7	475408	841318	Peak Found	Peak Found	High	High	1	Methylthio [C165]
TGGT1_270320	transcript=TGGT1_270320-t26_1 | gene=TGGT1_270320 | organism=Toxoplasma_gondii_GT1 | gene_product=PPM-type phosphatase domain-containing protein [Source:UniProtKB/TrEMBL;Acc:A0A125YP66] | transcript_product=protein phosphatase 2C domain-containing protein | location=TGGT1_chrVIII:5274953-5280379(+) | protein_length=538 | sequence_SO=chromosome | SO=protein_coding_gene | is_pseudo=false	0	FALSE	15.771	14	7	10	7	538	58.7	5.08	7.98	7	1.697	0.76	0.895594	1.31756e+06	2.23571e+06	2.95	17.5	1.34532e+06	1.29036e+06	1.97425e+06	2.53181e+06	248060	146535	746764	2.53181e+06	High	Peak Found	High	High	1
TGGT1_315320	transcript=TGGT1_315320-t26_1 | gene=TGGT1_315320 | organism=Toxoplasma_gondii_GT1 | gene_product=SAG-related sequence SRS52A [Source:UniProtKB/TrEMBL;Acc:S7UMK1] | transcript_product=SAG-related sequence SRS52A | location=TGGT1_chrXI:4594837-4596241(+) | protein_length=329 | sequence_SO=chromosome | SO=protein_coding_gene | is_pseudo=false	0	FALSE	21.383	33	7	15	7	329	34.2	5.52	23.96	7	1.697	0.76	0.895594	4.57158e+06	7.75613e+06	40.97	11.42	6.16006e+06	3.39271e+06	8.41008e+06	7.15302e+06	1.13584e+06	385280	3.18113e+06	7.15302e+06	High	Peak Found	High	High	1	Methylthio [C44; C69; C268]
TGGT1_263300	transcript=TGGT1_263300-t26_1 | gene=TGGT1_263300 | organism=Toxoplasma_gondii_GT1 | gene_product=Eukaryotic porin protein [Source:UniProtKB/TrEMBL;Acc:A0A125YUJ9] | transcript_product=eukaryotic porin protein | location=TGGT1_chrVIIb:618828-622551(-) | protein_length=290 | sequence_SO=chromosome | SO=protein_coding_gene | is_pseudo=false	0	FALSE	9.22	11	3	5	3	290	31.3	8.94	2.41	3	1.688	0.76	0.902091	1.13647e+06	1.91882e+06	22.65	32.62	1.33574e+06	966931	2.42685e+06	1.51714e+06	246294	109806	917960	1.51714e+06	Peak Found	Peak Found	High	High	1	Methylthio [C11; C59]
TGGT1_266080	transcript=TGGT1_266080-t26_1 | gene=TGGT1_266080 | organism=Toxoplasma_gondii_GT1 | gene_product=hypothetical protein | transcript_product=hypothetical protein | location=TGGT1_chrIX:1138397-1140583(+) | protein_length=728 | sequence_SO=chromosome | SO=protein_coding_gene | is_pseudo=false	0	FALSE	24.818	15	9	14	9	728	81.2	8.69	14.76	9	1.683	0.75	0.90846	2.86424e+06	4.82054e+06	42.9	1.55	3.91785e+06	2.09397e+06	4.76786e+06	4.8738e+06	722401	237794	1.80346e+06	4.8738e+06	High	Peak Found	High	High	1
TGGT1_313560	transcript=TGGT1_313560-t26_1 | gene=TGGT1_313560 | organism=Toxoplasma_gondii_GT1 | gene_product=Ribosomal_L7Ae domain-containing protein [Source:UniProtKB/TrEMBL;Acc:A0A125YHF8] | transcript_product=putative 60S ribosomal protein L7a | location=TGGT1_chrXI:3438810-3439331(-) | protein_length=173 | sequence_SO=chromosome | SO=protein_coding_gene | is_pseudo=false	0	FALSE	5.287	14	1	3	1	173	19.2	9.39	6.18	1	1.68	0.75	0.910044	414374	696284	22.16	33.36	485283	353826	547493	885511	89479.8	40180.9	207090	885511	Peak Found	Peak Found	Peak Found	High	1
TGGT1_300280	transcript=TGGT1_300280-t26_1 | gene=TGGT1_300280 | organism=Toxoplasma_gondii_GT1 | gene_product=Sm domain-containing protein [Source:UniProtKB/TrEMBL;Acc:S7UFN1] | transcript_product=LSM domain-containing protein | location=TGGT1_chrXII:70960-73566(-) | protein_length=169 | sequence_SO=chromosome | SO=protein_coding_gene | is_pseudo=false	0	FALSE	12.97	28	5	8	5	169	17.9	10.92	6.81	5	1.679	0.75	0.910044	1.19246e+06	2.00227e+06	85.27	9.79	2.39605e+06	593463	1.86818e+06	2.14598e+06	441801	67394.4	706646	2.14598e+06	High	Peak Found	High	High	1	Methylthio [C19]
TGGT1_315780	transcript=TGGT1_315780-t26_1 | gene=TGGT1_315780 | organism=Toxoplasma_gondii_GT1 | gene_product=Putative myosin regulatory light chain [Source:UniProtKB/TrEMBL;Acc:A0A125YT28] | transcript_product=putative myosin regulatory light chain | location=TGGT1_chrXI:4923626-4926382(+) | protein_length=206 | sequence_SO=chromosome | SO=protein_coding_gene | is_pseudo=false	0	FALSE	15.595	40	6	8	6	206	23.1	7.49	7.49	6	1.678	0.75	0.910044	1.03904e+06	1.7435e+06	69.73	23.86	1.78323e+06	605421	2.06724e+06	1.47047e+06	328805	68752.3	781939	1.47047e+06	Peak Found	Peak Found	High	High	1
TGGT1_306060	transcript=TGGT1_306060-t26_1 | gene=TGGT1_306060 | organism=Toxoplasma_gondii_GT1 | gene_product=Rhoptry neck protein RON8 [Source:UniProtKB/TrEMBL;Acc:A0A125YNG1] | transcript_product=rhoptry neck protein RON8 | location=TGGT1_chrIX:5560917-5575203(-) | protein_length=2980 | sequence_SO=chromosome | SO=protein_coding_gene | is_pseudo=false	0	FALSE	187.539	30	66	114	66	2980	328.8	8.4	129.33	66	1.673	0.74	0.910873	2.42917e+07	4.06419e+07	36.42	8.45	3.16133e+07	1.86659e+07	3.82829e+07	4.31464e+07	5.82907e+06	2.11972e+06	1.44806e+07	4.31464e+07	High	High	High	High	1	Methylthio [C649; C1656; C2076]
TGGT1_315220	transcript=TGGT1_315220-t26_1 | gene=TGGT1_315220 | organism=Toxoplasma_gondii_GT1 | gene_product=Rhoptry protein ROP14 [Source:UniProtKB/TrEMBL;Acc:S7UMJ4] | transcript_product=rhoptry protein ROP14 | location=TGGT1_chrXI:4529966-4537996(+) | protein_length=1061 | sequence_SO=chromosome | SO=protein_coding_gene | is_pseudo=false	0.037	FALSE	1.518	2	1	1	1	1061	121.8	8.81	0	1	1.673	0.74	0.910873	2.50529e+06	4.19142e+06	59.23	8.47	3.91442e+06	1.60342e+06	3.94753e+06	4.45038e+06	721767	182086	1.49316e+06	4.45038e+06	Peak Found	Peak Found	Peak Found	High	1
TGGT1_263320	transcript=TGGT1_263320-t26_1 | gene=TGGT1_263320 | organism=Toxoplasma_gondii_GT1 | gene_product=hypothetical protein | transcript_product=hypothetical protein | location=TGGT1_chrVIIb:613192-614403(-) | protein_length=403 | sequence_SO=chromosome | SO=protein_coding_gene | is_pseudo=false	0	FALSE	18.289	18	6	10	6	403	42.1	12.21	9.89	6	1.669	0.74	0.910873	2.55237e+06	4.26041e+06	44.93	4.04	3.54709e+06	1.8366e+06	4.14044e+06	4.38385e+06	654037	208567	1.56613e+06	4.38385e+06	High	Peak Found	High	High	1
TGGT1_212960B	transcript=TGGT1_212960B-t26_1 | gene=TGGT1_212960B | organism=Toxoplasma_gondii_GT1 | gene_product=hypothetical protein | transcript_product=hypothetical protein | location=TGGT1_chrV:599015-602482(+) | protein_length=370 | sequence_SO=chromosome | SO=protein_coding_gene | is_pseudo=false	0.003	FALSE	2.973	3	1	2	1	370	42.5	8.95	0	1	1.668	0.74	0.910873	128087	213709	49.46	15.15	184530	88908	191925	237966	34024.8	10096.5	72596	237966	Peak Found	Peak Found	High	High	1
TGGT1_235340	transcript=TGGT1_235340-t26_1 | gene=TGGT1_235340 | organism=Toxoplasma_gondii_GT1 | gene_product=hypothetical protein | transcript_product=hypothetical protein | location=TGGT1_chrX:4675810-4681430(+) | protein_length=720 | sequence_SO=chromosome | SO=protein_coding_gene | is_pseudo=false	0	FALSE	28.265	19	10	14	10	720	76.6	7.66	11.9	10	1.668	0.74	0.910873	1.98233e+06	3.30554e+06	36.3	0.83	2.57747e+06	1.5246e+06	3.28614e+06	3.32505e+06	475252	173135	1.24299e+06	3.32505e+06	High	Peak Found	High	High	1	Methylthio [C99; C148; C700]; Phospho [S279]
TGGT1_228470	transcript=TGGT1_228470-t26_1 | gene=TGGT1_228470 | organism=Toxoplasma_gondii_GT1 | gene_product=Ribosomal protein L15 [Source:UniProtKB/TrEMBL;Acc:A0A125YX54] | transcript_product=ribosomal protein RPL15 | location=TGGT1_chrX:205832-208062(+) | protein_length=205 | sequence_SO=chromosome | SO=protein_coding_gene | is_pseudo=false	0	FALSE	6.932	18	3	4	3	205	24.3	11.18	2.5	3	1.656	0.73	0.91764	1.22454e+06	2.02798e+06	18.16	15.03	1.39332e+06	1.07619e+06	1.82275e+06	2.25631e+06	256911	122214	689461	2.25631e+06	High	Peak Found	Peak Found	High	1
TGGT1_312990	transcript=TGGT1_312990-t26_1 | gene=TGGT1_312990 | organism=Toxoplasma_gondii_GT1 | gene_product=RNA helicase [Source:UniProtKB/TrEMBL;Acc:A0A125YGG3] | transcript_product=DEAD/DEAH box ATP-dependent RNA helicase | location=TGGT1_chrXI:2984273-2989253(-) | protein_length=569 | sequence_SO=chromosome | SO=protein_coding_gene | is_pseudo=false	0	FALSE	8.117	8	4	5	4	569	63.8	8.94	6.12	4	1.652	0.72	0.922175	852575	1.40844e+06	26.48	2.59	1.03042e+06	705427	1.38287e+06	1.43448e+06	189996	80109.1	523074	1.43448e+06	Peak Found	Peak Found	High	High	1
TGGT1_304670	transcript=TGGT1_304670-t26_1 | gene=TGGT1_304670 | organism=Toxoplasma_gondii_GT1 | gene_product=Leucine rich repeat-containing protein [Source:UniProtKB/TrEMBL;Acc:S7W2W6] | transcript_product=leucine rich repeat-containing protein | location=TGGT1_chrVIIa:590918-593626(-) | protein_length=338 | sequence_SO=chromosome | SO=protein_coding_gene | is_pseudo=false	0	FALSE	14.825	19	6	6	6	338	38.3	8.79	7.68	6	1.649	0.72	0.924208	1.38652e+06	2.28695e+06	27.57	10.26	1.68925e+06	1.13803e+06	2.12667e+06	2.4593e+06	311476	129236	804420	2.4593e+06	Peak Found	Peak Found	High	High	1
TGGT1_267350	transcript=TGGT1_267350-t26_1 | gene=TGGT1_267350 | organism=Toxoplasma_gondii_GT1 | gene_product=Small nuclear ribonucleoprotein Sm D1 [Source:UniProtKB/TrEMBL;Acc:A0A125YGA0] | transcript_product=LSM domain-containing protein | location=TGGT1_chrIX:540789-541154(-) | protein_length=121 | sequence_SO=chromosome | SO=protein_coding_gene | is_pseudo=false	0	FALSE	7.075	20	2	4	2	121	13.5	11.68	6.74	2	1.648	0.72	0.924524	867822	1.43011e+06	44.7	2.2	1.20383e+06	625597	1.4525e+06	1.40807e+06	221971	71043.6	549413	1.40807e+06	High	Peak Found	High	High	1
TGGT1_213280	transcript=TGGT1_213280-t26_1 | gene=TGGT1_213280 | organism=Toxoplasma_gondii_GT1 | gene_product=SAG-related sequence SRS25 [Source:UniProtKB/TrEMBL;Acc:A0A125YZD2] | transcript_product=SAG-related sequence SRS25 | location=TGGT1_chrV:764647-765222(-) | protein_length=191 | sequence_SO=chromosome | SO=protein_coding_gene | is_pseudo=false	0	FALSE	8.369	26	2	7	2	191	20.8	6.06	3.48	2	1.644	0.72	0.92703	1.33667e+06	2.19722e+06	39.11	1.92	1.77562e+06	1.00624e+06	2.2272e+06	2.16765e+06	327402	114270	842443	2.16765e+06	High	Peak Found	High	High	1	Methylthio [C56]
TGGT1_233190	transcript=TGGT1_233190-t26_1 | gene=TGGT1_233190 | organism=Toxoplasma_gondii_GT1 | gene_product=SKIP_SNW domain-containing protein [Source:UniProtKB/TrEMBL;Acc:S7V311] | transcript_product=SKIP/SNW domain-containing protein | location=TGGT1_chrVIII:2482334-2488980(+) | protein_length=557 | sequence_SO=chromosome | SO=protein_coding_gene | is_pseudo=false	0	FALSE	8.643	8	5	6	5	557	61.5	9.36	1.74	5	1.641	0.71	0.929031	666123	1.09301e+06	8.22	2.32	706015	628484	1.07521e+06	1.1111e+06	130180	71371.4	406702	1.1111e+06	Peak Found	Peak Found	High	High	1
TGGT1_246730	transcript=TGGT1_246730-t26_1 | gene=TGGT1_246730 | organism=Toxoplasma_gondii_GT1 | gene_product=hypothetical protein | transcript_product=hypothetical protein | location=TGGT1_chrXII:2879058-2882486(+) | protein_length=349 | sequence_SO=chromosome | SO=protein_coding_gene | is_pseudo=false	0	FALSE	5.044	9	2	2	2	349	40	9.88	0	2	1.633	0.71	0.929031	218336	356501	27.4	20.57	265670	179436	307926	412738	48986.1	20376.9	116474	412738	Peak Found	Peak Found	Peak Found	High	1
TGGT1_235140	transcript=TGGT1_235140-t26_1 | gene=TGGT1_235140 | organism=Toxoplasma_gondii_GT1 | gene_product=hypothetical protein | transcript_product=hypothetical protein | location=TGGT1_chrX:4531284-4533475(+) | protein_length=342 | sequence_SO=chromosome | SO=protein_coding_gene | is_pseudo=false	0	FALSE	9.121	20	4	4	4	342	36.6	11.34	0	4	1.629	0.7	0.929031	501220	816653	15.19	0.37	558302	449975	814492	818820	102944	51099.7	308084	818820	Peak Found	Peak Found	Peak Found	High	1
TGGT1_277260	transcript=TGGT1_277260-t26_1 | gene=TGGT1_277260 | organism=Toxoplasma_gondii_GT1 | gene_product=hypothetical protein | transcript_product=hypothetical protein | location=TGGT1_chrXII:6595491-6602496(-) | protein_length=1684 | sequence_SO=chromosome | SO=protein_coding_gene | is_pseudo=false	0.013	FALSE	2.005	0	1	1	1	1684	185.1	6.4	0	1	1.628	0.7	0.929031	1.49217e+06	2.42916e+06	6.87	6.37	1.56648e+06	1.42139e+06	2.32208e+06	2541170	288839	161414	878333	2541170	High	Peak Found	Peak Found	Peak Found	1
TGGT1_286600	transcript=TGGT1_286600-t26_1 | gene=TGGT1_286600 | organism=Toxoplasma_gondii_GT1 | gene_product=hypothetical protein | transcript_product=hypothetical protein | location=TGGT1_chrV:1621096-1622773(-) | protein_length=388 | sequence_SO=chromosome | SO=protein_coding_gene | is_pseudo=false	0	FALSE	23.284	40	8	14	8	388	43	8.76	9.82	8	1.628	0.7	0.929031	2.3896e+06	3.88965e+06	39.15	21.76	3.17517e+06	1.79838e+06	4.54222e+06	3.33083e+06	585459	204226	1.71811e+06	3.33083e+06	High	Peak Found	High	High	1	Methylthio [C40; C106; C125; C147; C346]
TGGT1_295360	transcript=TGGT1_295360-t26_1 | gene=TGGT1_295360 | organism=Toxoplasma_gondii_GT1 | gene_product=hypothetical protein | transcript_product=hypothetical protein | location=TGGT1_chrIa:1791407-1792949(+) | protein_length=268 | sequence_SO=chromosome | SO=protein_coding_gene | is_pseudo=false	0	FALSE	20.76	44	8	19	8	268	29.5	7.08	19.62	8	1.625	0.7	0.929031	7.71581e+06	1.25362e+07	28.63	1.82	9.47398e+06	6.28392e+06	1.23758e+07	1.26986e+07	1.74688e+06	713610	4.68118e+06	1.26986e+07	High	Peak Found	High	High	1	Methylthio [C57; C120]; Phospho [S40; S58]
TGGT1_224530	transcript=TGGT1_224530-t26_1 | gene=TGGT1_224530 | organism=Toxoplasma_gondii_GT1 | gene_product=Alveolin domain containing intermediate filament IMC5 [Source:UniProtKB/TrEMBL;Acc:A0A125YUN3] | transcript_product=alveolin domain containing intermediate filament IMC5 | location=TGGT1_chrX:2905298-2908406(-) | protein_length=584 | sequence_SO=chromosome | SO=protein_coding_gene | is_pseudo=false	0.032	FALSE	1.651	2	1	1	1	584	62.6	7.66	0	1	1.623	0.7	0.929031	219294	355962	19.19	8.74	251377	191305	378674	334611	46350.6	21724.9	143235	334611	Peak Found	Peak Found	Peak Found	High	1
TGGT1_257070	transcript=TGGT1_257070-t26_1 | gene=TGGT1_257070 | organism=Toxoplasma_gondii_GT1 | gene_product=hypothetical protein | transcript_product=hypothetical protein | location=TGGT1_chrVIIb:4176004-4180213(-) | protein_length=484 | sequence_SO=chromosome | SO=protein_coding_gene | is_pseudo=false	0.002	FALSE	4.129	5	2	2	2	484	49.9	9.79	1.94	2	1.622	0.7	0.929031	237543	385275	44.82	2.58	329839	171074	392363	378315	60817.9	19427.4	148412	378315	Peak Found	Peak Found	Peak Found	High	1
TGGT1_253900	transcript=TGGT1_253900-t26_1 | gene=TGGT1_253900 | organism=Toxoplasma_gondii_GT1 | gene_product=Delta-aminolevulinic acid dehydratase [Source:UniProtKB/TrEMBL;Acc:S7ULV4] | transcript_product=parasite porphobilinogen synthase PBGS | location=TGGT1_chrIII:1265521-1273167(-) | protein_length=658 | sequence_SO=chromosome | SO=protein_coding_gene | is_pseudo=false	0	FALSE	4.465	4	2	2	2	658	71.3	5.17	0	2	1.621	0.7	0.929031	172427	279491	34.39	1.6	220989	134537	282662	276355	40747.5	15278.1	106917	276355	Peak Found	Peak Found	Peak Found	High	1
TGGT1_232410	transcript=TGGT1_232410-t26_1 | gene=TGGT1_232410 | organism=Toxoplasma_gondii_GT1 | gene_product=Thioredoxin-like_fold domain-containing protein [Source:UniProtKB/TrEMBL;Acc:A0A125YMM2] | transcript_product=PDI family protein | location=TGGT1_chrVIII:2074655-2076392(-) | protein_length=220 | sequence_SO=chromosome | SO=protein_coding_gene | is_pseudo=false	0	FALSE	44.756	74	12	41	12	220	24.9	6.4	69.7	12	1.62	0.7	0.929031	2.11753e+07	3.43062e+07	60.12	6.25	3.334e+07	1.34491e+07	3.28225e+07	3.58569e+07	6.14746e+06	1.5273e+06	1.24152e+07	3.58569e+07	High	High	High	High	1	Methylthio [C85; C186]
TGGT1_252500	transcript=TGGT1_252500-t26_1 | gene=TGGT1_252500 | organism=Toxoplasma_gondii_GT1 | gene_product=Protein kinase domain-containing protein [Source:UniProtKB/TrEMBL;Acc:S7VW49] | transcript_product=polo kinase | location=TGGT1_chrIII:579006-581099(-) | protein_length=697 | sequence_SO=chromosome | SO=protein_coding_gene | is_pseudo=false	0	FALSE	12.897	10	5	6	5	697	76.9	10.58	4.92	5	1.618	0.69	0.929031	513909	831510	49.52	0.22	740759	356529	830209	832813	136586	40487.9	314029	832813	High	Peak Found	Peak Found	High	1
TGGT1_292120	transcript=TGGT1_292120-t26_1 | gene=TGGT1_292120 | organism=Toxoplasma_gondii_GT1 | gene_product=Membrane occupation and recognition nexus protein MORN2 [Source:UniProtKB/TrEMBL;Acc:S7W455] | transcript_product=membrane occupation and recognition nexus protein MORN2 | location=TGGT1_chrIX:4369445-4370842(+) | protein_length=465 | sequence_SO=chromosome | SO=protein_coding_gene | is_pseudo=false	0.003	FALSE	3.09	3	1	1	1	465	49.3	5.41	0	1	1.616	0.69	0.929031	48973.2	79149.4	29.1	16.3	39745.7	60343	70498.4	88862	7328.58	6852.63	26666.2	88862	Peak Found	Peak Found	Peak Found	High	1
TGGT1_257470	transcript=TGGT1_257470-t26_1 | gene=TGGT1_257470 | organism=Toxoplasma_gondii_GT1 | gene_product=Myosin motor domain-containing protein [Source:UniProtKB/TrEMBL;Acc:S7WF44] | transcript_product=myosin J | location=TGGT1_chrVIIb:3962778-3973847(+) | protein_length=2532 | sequence_SO=chromosome | SO=protein_coding_gene | is_pseudo=false	0	FALSE	6.059	2	3	3	3	2532	273.5	8.65	0	3	1.612	0.69	0.93393	216334	348710	2.45	0.11	220109	212624	348443	348978	40585.3	24145.9	131799	348978	Peak Found	Peak Found	Peak Found	High	1
TGGT1_310010	transcript=TGGT1_310010-t26_1 | gene=TGGT1_310010 | organism=Toxoplasma_gondii_GT1 | gene_product=Sushi domain-containing protein [Source:UniProtKB/TrEMBL;Acc:S7UT16] | transcript_product=rhoptry neck protein RON1 | location=TGGT1_chrXI:969238-974493(+) | protein_length=1158 | sequence_SO=chromosome | SO=protein_coding_gene | is_pseudo=false	0	FALSE	7.894	3	4	5	4	1158	127.5	4.98	9.63	4	1.608	0.68	0.938945	1.33442e+06	2.14519e+06	49.16	9.51	1.91784e+06	928486	2.0055e+06	2.2946e+06	353624	105440	758586	2.2946e+06	Peak Found	Peak Found	High	High	1
TGGT1_283510	transcript=TGGT1_283510-t26_1 | gene=TGGT1_283510 | organism=Toxoplasma_gondii_GT1 | gene_product=hypothetical protein | transcript_product=hypothetical protein | location=TGGT1_chrV:2942804-2948041(+) | protein_length=314 | sequence_SO=chromosome | SO=protein_coding_gene | is_pseudo=false	0	FALSE	13.518	24	5	8	5	314	34.7	6.71	4.29	5	1.604	0.68	0.941137	1.09309e+06	1.75349e+06	44.8	12.78	1.51751e+06	787380	1.91979e+06	1.6016e+06	279808	89415.8	726164	1.6016e+06	High	Peak Found	High	High	1	Methylthio [C265]
TGGT1_275480	transcript=TGGT1_275480-t26_1 | gene=TGGT1_275480 | organism=Toxoplasma_gondii_GT1 | gene_product=Myb family DNA-binding domain-containing protein [Source:UniProtKB/TrEMBL;Acc:S7VYM2] | transcript_product=Myb family DNA-binding domain-containing protein | location=TGGT1_chrX:7176962-7188868(-) | protein_length=888 | sequence_SO=chromosome | SO=protein_coding_gene | is_pseudo=false	0	FALSE	14.59	11	7	7	7	888	99.2	6.81	0	7	1.6	0.68	0.946025	670090	1.07184e+06	27	4.1	812988	552309	1.04119e+06	1.1034e+06	149904	62720.9	393833	1.1034e+06	Peak Found	Peak Found	Peak Found	High	1
TGGT1_276140	transcript=TGGT1_276140-t26_1 | gene=TGGT1_276140 | organism=Toxoplasma_gondii_GT1 | gene_product=ADP ribosylation factor ARF1 [Source:UniProtKB/TrEMBL;Acc:S7UMN8] | transcript_product=ADP ribosylation factor ARF1 | location=TGGT1_chrIII:108590-111506(-) | protein_length=551 | sequence_SO=chromosome | SO=protein_coding_gene | is_pseudo=false	0	FALSE	13.031	8	3	11	3	551	61.7	9.89	21.43	3	1.597	0.68	0.946867	5.67288e+06	9.0586e+06	45.5	9.42	7.91902e+06	4.06384e+06	8.47385e+06	9.68371e+06	1.46016e+06	461494	3.20526e+06	9.68371e+06	High	Peak Found	High	High	1
TGGT1_305930	transcript=TGGT1_305930-t26_1 | gene=TGGT1_305930 | organism=Toxoplasma_gondii_GT1 | gene_product=hypothetical protein | transcript_product=hypothetical protein | location=TGGT1_chrIX:5457389-5459694(-) | protein_length=234 | sequence_SO=chromosome | SO=protein_coding_gene | is_pseudo=false	0.019	FALSE	1.911	10	1	1	1	234	26.1	6.84	0	1	1.597	0.68	0.946867	67776.3	108212	NA	4.81	67776.3	NA	111958	104591	12497.1	NA	42348.4	104591	Peak Found	Not Found	Peak Found	High	1
TGGT1_222350	transcript=TGGT1_222350-t26_1 | gene=TGGT1_222350 | organism=Toxoplasma_gondii_GT1 | gene_product=hypothetical protein | transcript_product=hypothetical protein | location=TGGT1_chrII:1038452-1045656(-) | protein_length=410 | sequence_SO=chromosome | SO=protein_coding_gene | is_pseudo=false	0	FALSE	12.988	18	7	7	7	410	47.9	8.88	1.66	7	1.59	0.67	0.950448	852821	1.35592e+06	46.72	0.4	1.20209e+06	605034	1.35208e+06	1.35977e+06	221649	68708.4	511426	1.35977e+06	Peak Found	Peak Found	Peak Found	High	1	Methylthio [C343]
TGGT1_236975	transcript=TGGT1_236975-t26_1 | gene=TGGT1_236975 | organism=Toxoplasma_gondii_GT1 | gene_product=Toxoplasma gondii family D protein [Source:UniProtKB/TrEMBL;Acc:S7UQK6] | transcript_product=Toxoplasma gondii family D protein | location=TGGT1_chrX:5528792-5530540(+) | protein_length=582 | sequence_SO=chromosome | SO=protein_coding_gene | is_pseudo=false	0.042	FALSE	1.462	2	1	1	1	582	66.2	8.31	0	1	1.59	0.67	0.950448	46944.4	74621.6	NA	26.83	46944.4	NA	61583.2	90420.5	8655.93	NA	23294	90420.5	Peak Found	Not Found	Peak Found	High	1	Methylthio [C162]
TGGT1_225790	transcript=TGGT1_225790-t26_1 | gene=TGGT1_225790 | organism=Toxoplasma_gondii_GT1 | gene_product=Thioredoxin-like_fold domain-containing protein [Source:UniProtKB/TrEMBL;Acc:A0A125YFI3] | transcript_product=PDI family protein | location=TGGT1_chrX:1946861-1948766(+) | protein_length=189 | sequence_SO=chromosome | SO=protein_coding_gene | is_pseudo=false	0	FALSE	16.351	38	6	8	6	189	21.6	9.23	8.15	6	1.58	0.66	0.959926	1.48845e+06	2.35204e+06	30.17	9.58	1.84859e+06	1.19846e+06	2.51711e+06	2.19781e+06	340856	136099	952103	2.19781e+06	Peak Found	Peak Found	High	High	1	Methylthio [C46]
TGGT1_223940	transcript=TGGT1_223940-t26_1 | gene=TGGT1_223940 | organism=Toxoplasma_gondii_GT1 | gene_product=GAP45 protein [Source:UniProtKB/TrEMBL;Acc:A0A125YXT6] | transcript_product=GAP45 protein | location=TGGT1_chrX:3344621-3345358(-) | protein_length=245 | sequence_SO=chromosome | SO=protein_coding_gene | is_pseudo=false	0	FALSE	23.257	36	7	20	7	245	27.3	5.07	21.5	7	1.57	0.65	0.962341	1.14337e+07	1.79524e+07	58.49	4.07	1.77512e+07	7.36447e+06	1.84772e+07	1.74425e+07	3.2731e+06	836318	6.98905e+06	1.74425e+07	High	Peak Found	High	High	1	Phospho [S163]; Methylthio [C201]
TGGT1_319850	transcript=TGGT1_319850-t26_1 | gene=TGGT1_319850 | organism=Toxoplasma_gondii_GT1 | gene_product=RRM domain-containing protein [Source:UniProtKB/TrEMBL;Acc:S7UK80] | transcript_product=splicing factor U2AF family SnRNP auxilary factor large subunit, RRM domain-containing protein | location=TGGT1_chrIV:689661-691811(+) | protein_length=495 | sequence_SO=chromosome | SO=protein_coding_gene | is_ps…	0	FALSE	17.72	16	6	9	6	495	51.6	9.06	3.95	6	1.566	0.65	0.962341	2.07811e+06	3.25387e+06	27.88	11.26	2.53763e+06	1.7018e+06	3.00433e+06	3.52413e+06	467907	193259	1.1364e+06	3.52413e+06	High	Peak Found	High	High	1
TGGT1_248740	transcript=TGGT1_248740-t26_1 | gene=TGGT1_248740 | organism=Toxoplasma_gondii_GT1 | gene_product=hypothetical protein | transcript_product=hypothetical protein | location=TGGT1_chrXII:4066708-4074096(-) | protein_length=1283 | sequence_SO=chromosome | SO=protein_coding_gene | is_pseudo=false	0	FALSE	18.827	8	7	10	7	1283	140	8.44	8.98	7	1.565	0.65	0.962341	2.8107e+06	4.39766e+06	29.45	0.85	3.4722e+06	2.27522e+06	4.4242e+06	4.37128e+06	640227	258377	1.67347e+06	4.37128e+06	Peak Found	Peak Found	High	High	1
TGGT1_320100	transcript=TGGT1_320100-t26_1 | gene=TGGT1_320100 | organism=Toxoplasma_gondii_GT1 | gene_product=RNA recognition motif-containing protein [Source:UniProtKB/TrEMBL;Acc:S7VYK2] | transcript_product=RNA recognition motif-containing protein | location=TGGT1_chrIV:443805-449909(+) | protein_length=1216 | sequence_SO=chromosome | SO=protein_coding_gene | is_pseudo=false	0	FALSE	15.094	7	6	7	6	1216	128.8	8.5	4.47	6	1.563	0.64	0.962341	651539	1.01846e+06	26.12	15.44	785408	540487	912722	1.13645e+06	144819	61378.3	345240	1.13645e+06	Peak Found	Peak Found	High	High	1	Methylthio [C924]
TGGT1_226980	transcript=TGGT1_226980-t26_1 | gene=TGGT1_226980 | organism=Toxoplasma_gondii_GT1 | gene_product=hypothetical protein | transcript_product=hypothetical protein | location=TGGT1_chrX:1079489-1083730(-) | protein_length=227 | sequence_SO=chromosome | SO=protein_coding_gene | is_pseudo=false	0.037	FALSE	1.501	4	1	1	1	227	25.3	5.05	0	1	1.561	0.64	0.962341	104800	163544	NA	28.88	NA	104800	201176	132951	NA	11901.2	76095.3	132951	Not Found	Peak Found	Peak Found	High	1	Methylthio [C124]
TGGT1_297180	transcript=TGGT1_297180-t26_1 | gene=TGGT1_297180 | organism=Toxoplasma_gondii_GT1 | gene_product=hypothetical protein | transcript_product=hypothetical protein | location=TGGT1_chrII:1568655-1575825(-) | protein_length=871 | sequence_SO=chromosome | SO=protein_coding_gene | is_pseudo=false	0	FALSE	5.49	4	3	3	3	871	97.6	7.71	0	3	1.554	0.64	0.962341	220548	342714	NA	4.9	220548	NA	331034	354806	40666.1	NA	125215	354806	Peak Found	Not Found	Peak Found	High	1
TGGT1_264690	transcript=TGGT1_264690-t26_1 | gene=TGGT1_264690 | organism=Toxoplasma_gondii_GT1 | gene_product=Putative cyclin 4 [Source:UniProtKB/TrEMBL;Acc:S7UFU0] | transcript_product=putative cyclin 4 | location=TGGT1_chrIX:1927814-1932076(-) | protein_length=634 | sequence_SO=chromosome | SO=protein_coding_gene | is_pseudo=false	0.003	FALSE	2.845	2	1	1	1	634	69.9	9.16	1.72	1	1.553	0.64	0.962341	57377.7	89112.4	17.08	18.35	64783.3	50818.6	78208.5	101536	11945.2	5771.02	29582.6	101536	Peak Found	Peak Found	Peak Found	High	1
TGGT1_314080	transcript=TGGT1_314080-t26_1 | gene=TGGT1_314080 | organism=Toxoplasma_gondii_GT1 | gene_product=hypothetical protein | transcript_product=hypothetical protein | location=TGGT1_chrXI:3872920-3874228(+) | protein_length=179 | sequence_SO=chromosome | SO=protein_coding_gene | is_pseudo=false	0	FALSE	7.867	27	3	5	3	179	20.7	6.37	0	3	1.553	0.64	0.962341	2.11825e+06	3.29057e+06	1.48	5.22	2.14047e+06	2.09627e+06	3.17133e+06	3.4143e+06	394675	238055	1.19956e+06	3.4143e+06	Peak Found	Peak Found	High	High	1
TGGT1_256970	transcript=TGGT1_256970-t26_1 | gene=TGGT1_256970 | organism=Toxoplasma_gondii_GT1 | gene_product=Putative vacuolar ATP synthase subunit A [Source:UniProtKB/TrEMBL;Acc:S7WF08] | transcript_product=putative vacuolar ATP synthase subunit A | location=TGGT1_chrVIIb:4248002-4257516(-) | protein_length=616 | sequence_SO=chromosome | SO=protein_coding_gene | is_pseudo=false	0	FALSE	7.552	7	3	4	3	616	68.1	5.48	0	3	1.552	0.63	0.962341	165723	257175	34.56	49.28	129142	212665	178762	369983	23812.2	24150.5	67617.1	369983	Peak Found	Peak Found	High	High	1
TGGT1_275860	transcript=TGGT1_275860-t26_1 | gene=TGGT1_275860 | organism=Toxoplasma_gondii_GT1 | gene_product=hypothetical protein | transcript_product=hypothetical protein | location=TGGT1_chrIII:168447-170625(+) | protein_length=383 | sequence_SO=chromosome | SO=protein_coding_gene | is_pseudo=false	0	FALSE	12.698	17	4	7	4	383	43.2	9.09	3.68	4	1.552	0.63	0.962341	983594	1.52673e+06	16.89	15.88	872351	1.10902e+06	1.70902e+06	1.36389e+06	160850	125942	646440	1.36389e+06	Peak Found	High	High	High	1
TGGT1_250340	transcript=TGGT1_250340-t26_1 | gene=TGGT1_250340 | organism=Toxoplasma_gondii_GT1 | gene_product=Centrin 2 [Source:UniProtKB/TrEMBL;Acc:S7V0C6] | transcript_product=centrin 2 | location=TGGT1_chrXII:4993747-4995535(-) | protein_length=170 | sequence_SO=chromosome | SO=protein_coding_gene | is_pseudo=false	0	FALSE	28.199	61	8	14	8	170	19.1	4.67	18.41	8	1.55	0.63	0.962341	2.56105e+06	3.96954e+06	55.29	0.97	3.87045e+06	1.69462e+06	3.99689e+06	3.94238e+06	713661	192443	1.51183e+06	3.94238e+06	High	Peak Found	High	High	1
TGGT1_243950	transcript=TGGT1_243950-t26_1 | gene=TGGT1_243950 | organism=Toxoplasma_gondii_GT1 | gene_product=Prohibitin [Source:UniProtKB/TrEMBL;Acc:A0A125YRG2] | transcript_product=putative prohibitin | location=TGGT1_chrVI:2820162-2822544(+) | protein_length=271 | sequence_SO=chromosome | SO=protein_coding_gene | is_pseudo=false	0	FALSE	4.709	7	2	3	2	271	30.2	8.1	1.9	2	1.549	0.63	0.962341	821660	1.27268e+06	31.58	2.6	1.03119e+06	654703	1.24949e+06	1.2963e+06	190139	74348.8	472622	1.2963e+06	Peak Found	Peak Found	High	High	1
TGGT1_239790	transcript=TGGT1_239790-t26_1 | gene=TGGT1_239790 | organism=Toxoplasma_gondii_GT1 | gene_product=Pescadillo homolog [Source:UniProtKB/TrEMBL;Acc:S7URT4] | transcript_product=BRCA1 C Terminus (BRCT) domain-containing protein | location=TGGT1_chrVI:904502-910069(+) | protein_length=733 | sequence_SO=chromosome | SO=protein_coding_gene | is_pseudo=false	0.001	FALSE	3.538	2	1	2	1	733	82.1	5.78	2.04	1	1.544	0.63	0.962341	132100	203981	5.44	8.46	137284	127112	192126	216567	25313.3	14435	72672.1	216567	Peak Found	Peak Found	High	High	1
TGGT1_275750	transcript=TGGT1_275750-t26_1 | gene=TGGT1_275750 | organism=Toxoplasma_gondii_GT1 | gene_product=Small nuclear ribonucleoprotein E [Source:UniProtKB/TrEMBL;Acc:A0A125YK47] | transcript_product=putative small nuclear ribonucleoprotein E | location=TGGT1_chrIII:236922-238994(-) | protein_length=91 | sequence_SO=chromosome | SO=protein_coding_gene | is_pseudo=false	0.003	FALSE	3.516	12	1	3	1	91	10.8	9.7	5.5	1	1.544	0.63	0.962341	519298	801671	60.77	20.95	822258	327964	690533	930695	151614	37244	261196	930695	High	Peak Found	High	High	1
TGGT1_201400	transcript=TGGT1_201400-t26_1 | gene=TGGT1_201400 | organism=Toxoplasma_gondii_GT1 | gene_product=Sin3-associated polypeptide SAP18 [Source:UniProtKB/TrEMBL;Acc:S7UV76] | transcript_product=Sin3-associated polypeptide SAP18 | location=TGGT1_chrVIIa:3801972-3807611(-) | protein_length=868 | sequence_SO=chromosome | SO=protein_coding_gene | is_pseudo=false	0	FALSE	8.483	6	4	5	4	868	97.2	10.54	2.16	4	1.537	0.62	0.969935	670131	1.03006e+06	27.09	8.88	813574	551978	1.0969e+06	967292	150012	62683.3	414906	967292	High	Peak Found	Peak Found	High	1
TGGT1_295420	transcript=TGGT1_295420-t26_1 | gene=TGGT1_295420 | organism=Toxoplasma_gondii_GT1 | gene_product=hypothetical protein | transcript_product=hypothetical protein | location=TGGT1_chrIa:1740779-1746947(-) | protein_length=735 | sequence_SO=chromosome | SO=protein_coding_gene | is_pseudo=false	0.03	FALSE	1.745	1	1	1	1	735	80.6	5.33	0	1	1.537	0.62	0.969935	89397.4	137395	44.04	3.23	123369	64780.1	134296	140565	22747.7	7356.51	50797.7	140565	Peak Found	Peak Found	Peak Found	High	1
TGGT1_202760	transcript=TGGT1_202760-t26_1 | gene=TGGT1_202760 | organism=Toxoplasma_gondii_GT1 | gene_product=hypothetical protein | transcript_product=hypothetical protein | location=TGGT1_chrVIIa:2950166-2953731(-) | protein_length=364 | sequence_SO=chromosome | SO=protein_coding_gene | is_pseudo=false	0.037	FALSE	1.506	2	1	1	1	364	38.6	8.13	0	1	1.533	0.62	0.972164	161771	247959	3.4	7.99	165705	157930	234328	262383	30553.8	17934.7	88635.2	262383	Peak Found	Peak Found	Peak Found	High	1
TGGT1_246930	transcript=TGGT1_246930-t26_1 | gene=TGGT1_246930 | organism=Toxoplasma_gondii_GT1 | gene_product=Calmodulin CAM1 [Source:UniProtKB/TrEMBL;Acc:A0A125YXA3] | transcript_product=calmodulin CAM1 | location=TGGT1_chrXII:2955983-2956522(-) | protein_length=179 | sequence_SO=chromosome | SO=protein_coding_gene | is_pseudo=false	0	FALSE	8.755	24	4	5	4	179	19	5.11	0	4	1.533	0.62	0.972164	663269	1.01652e+06	50.52	5.85	963802	456448	1.05945e+06	975335	177713	51834.8	400739	975335	Peak Found	Peak Found	High	High	1
TGGT1_223000	transcript=TGGT1_223000-t26_1 | gene=TGGT1_223000 | organism=Toxoplasma_gondii_GT1 | gene_product=Dynein light chain [Source:UniProtKB/TrEMBL;Acc:S7UL29] | transcript_product=dynein light chain DLC | location=TGGT1_chrII:1350278-1351342(+) | protein_length=138 | sequence_SO=chromosome | SO=protein_coding_gene | is_pseudo=false	0.002	FALSE	3.806	16	1	4	1	138	16	8.46	2.48	1	1.529	0.61	0.972164	589405	901490	0.72	14.96	592417	586409	810674	1.00248e+06	109234	66593.3	306639	1.00248e+06	High	High	High	High	1	Methylthio [C73]
TGGT1_259640	transcript=TGGT1_259640-t26_1 | gene=TGGT1_259640 | organism=Toxoplasma_gondii_GT1 | gene_product=Peptidase S59 domain-containing protein [Source:UniProtKB/TrEMBL;Acc:S7UYU4] | transcript_product=nucleoporin autopeptidase | location=TGGT1_chrVIIb:2709338-2721341(-) | protein_length=2894 | sequence_SO=chromosome | SO=protein_coding_gene | is_pseudo=false	0	FALSE	10.314	2	5	5	5	2894	302.1	6.65	1.85	5	1.527	0.61	0.972164	1.31866e+06	2.01311e+06	44.41	3.4	1.82509e+06	952756	1.96523e+06	2.06217e+06	336523	108196	743352	2.06217e+06	Peak Found	Peak Found	Peak Found	High	1
TGGT1_294550	transcript=TGGT1_294550-t26_1 | gene=TGGT1_294550 | organism=Toxoplasma_gondii_GT1 | gene_product=Dynein heavy chain [Source:UniProtKB/TrEMBL;Acc:S7VWW7] | transcript_product=dynein heavy chain | location=TGGT1_chrIa:919161-949027(+) | protein_length=4974 | sequence_SO=chromosome | SO=protein_coding_gene | is_pseudo=false	0.003	FALSE	2.962	0	2	3	2	4974	558.3	5.73	1.72	2	1.527	0.61	0.972164	361000	551269	2	60.51	366152	355921	348954	870883	67513.6	40418.9	131993	870883	Peak Found	Peak Found	High	High	1
TGGT1_294610	transcript=TGGT1_294610-t26_1 | gene=TGGT1_294610 | organism=Toxoplasma_gondii_GT1 | gene_product=SET domain-containing protein [Source:UniProtKB/TrEMBL;Acc:A0A125YKT4] | transcript_product=putative histone lysine methyltransferase, SET | location=TGGT1_chrIa:979977-985190(-) | protein_length=1737 | sequence_SO=chromosome | SO=protein_coding_gene | is_pseudo=false	0	FALSE	13.204	4	6	7	6	1737	189.7	5.29	4.09	6	1.527	0.61	0.972164	453679	692571	23.49	9.63	536494	383648	646924	741440	98922.5	43567.6	244701	741440	Peak Found	Peak Found	High	High	1
TGGT1_286080	transcript=TGGT1_286080-t26_1 | gene=TGGT1_286080 | organism=Toxoplasma_gondii_GT1 | gene_product=Tr-type G domain-containing protein [Source:UniProtKB/TrEMBL;Acc:S7UP08] | transcript_product=elongation factor 2 family protein | location=TGGT1_chrV:1864243-1874860(+) | protein_length=1008 | sequence_SO=chromosome | SO=protein_coding_gene | is_pseudo=false	0	FALSE	19.128	10	7	9	7	1008	113.3	5.2	11.09	7	1.513	0.6	0.988206	1.33171e+06	2.01437e+06	9.65	6.9	1.42595e+06	1.24369e+06	1.91831e+06	2.11523e+06	262926	141235	725606	2.11523e+06	High	Peak Found	High	High	1	Methylthio [C233; C702]
TGGT1_321500	transcript=TGGT1_321500-t26_1 | gene=TGGT1_321500 | organism=Toxoplasma_gondii_GT1 | gene_product=RNA recognition motif-containing protein [Source:UniProtKB/TrEMBL;Acc:A0A125YP61] | transcript_product=RNA recognition motif-containing protein | location=TGGT1_chrIb:1771014-1773404(+) | protein_length=475 | sequence_SO=chromosome | SO=protein_coding_gene | is_pseudo=false	0.01	FALSE	2.379	3	1	2	1	475	50.9	8.35	0	1	1.508	0.59	0.988943	148321	223617	NA	1.79	148321	NA	220808	226462	27348.5	NA	83521.2	226462	Peak Found	Not Found	Peak Found	High	1
TGGT1_232730	transcript=TGGT1_232730-t26_1 | gene=TGGT1_232730 | organism=Toxoplasma_gondii_GT1 | gene_product=O-acyltransferase [Source:UniProtKB/TrEMBL;Acc:A0A125YH48] | transcript_product=acyl-CoA:diacylglycerol acyltransferase 1-related enzyme | location=TGGT1_chrVIII:2236582-2240536(+) | protein_length=540 | sequence_SO=chromosome | SO=protein_coding_gene | is_pseudo=false	0.003	FALSE	2.96	2	1	2	1	540	63.4	9.32	0	1	1.503	0.59	0.993058	180562	271386	21.9	1.17	211066	154466	273639	269151	38917.8	17541.3	103505	269151	Peak Found	Peak Found	High	High	1
TGGT1_312490	transcript=TGGT1_312490-t26_1 | gene=TGGT1_312490 | organism=Toxoplasma_gondii_GT1 | gene_product=hypothetical protein | transcript_product=hypothetical protein | location=TGGT1_chrXI:2688508-2693146(+) | protein_length=443 | sequence_SO=chromosome | SO=protein_coding_gene | is_pseudo=false	0.006	FALSE	2.493	2	1	2	1	443	49	11	1.72	1	1.5	0.58	0.993058	320737	481071	4.37	5.01	330803	310978	498439	464309	60995.7	35315	188536	464309	High	Peak Found	High	Peak Found	1
TGGT1_306600	transcript=TGGT1_306600-t26_1 | gene=TGGT1_306600 | organism=Toxoplasma_gondii_GT1 | gene_product=RRM domain-containing protein [Source:UniProtKB/TrEMBL;Acc:A0A125YLJ1] | transcript_product=RNA recognition motif-containing protein | location=TGGT1_chrIX:5986467-5988759(-) | protein_length=189 | sequence_SO=chromosome | SO=protein_coding_gene | is_pseudo=false	0.001	FALSE	3.645	13	2	2	2	189	21.2	11.3	2.13	2	1.499	0.58	0.993058	815926	1.22277e+06	21.95	11.75	954111	697754	1.12509e+06	1.32894e+06	175926	79237.8	425567	1.32894e+06	Peak Found	Peak Found	Peak Found	High	1
TGGT1_217540	transcript=TGGT1_217540-t26_1 | gene=TGGT1_217540 | organism=Toxoplasma_gondii_GT1 | gene_product=RNA recognition motif-containing protein [Source:UniProtKB/TrEMBL;Acc:S7WAA2] | transcript_product=RNA recognition motif-containing protein | location=TGGT1_chrXII:1835563-1837479(-) | protein_length=351 | sequence_SO=chromosome | SO=protein_coding_gene | is_pseudo=false	0	FALSE	15.426	25	6	8	6	351	38.1	9.61	5.8	6	1.49	0.58	0.996961	2.06874e+06	3.08202e+06	22.52	15.39	2.42913e+06	1.76181e+06	2.76311e+06	3.43774e+06	447900	200074	1.04515e+06	3.43774e+06	High	High	High	High	1
TGGT1_217740	transcript=TGGT1_217740-t26_1 | gene=TGGT1_217740 | organism=Toxoplasma_gondii_GT1 | gene_product=3-ketoacyl-(Acyl-carrier-protein) reductase [Source:UniProtKB/TrEMBL;Acc:S7V1K3] | transcript_product=3-ketoacyl-(acyl-carrier-protein) reductase | location=TGGT1_chrXII:2024723-2028460(+) | protein_length=376 | sequence_SO=chromosome | SO=protein_coding_gene | is_pseudo=false	0	FALSE	12.73	15	4	6	4	376	39	9.23	10.95	4	1.484	0.57	0.998957	978440	1.45178e+06	25.74	2.8	1.17618e+06	813945	1.4233e+06	1.48083e+06	216872	92432.5	538365	1.48083e+06	Peak Found	Peak Found	High	High	1	Methylthio [C169]
TGGT1_208970	transcript=TGGT1_208970-t26_1 | gene=TGGT1_208970 | organism=Toxoplasma_gondii_GT1 | gene_product=RRM domain-containing protein [Source:UniProtKB/TrEMBL;Acc:S7VS87] | transcript_product=RNA recognition motif-containing protein | location=TGGT1_chrIb:942283-944701(-) | protein_length=283 | sequence_SO=chromosome | SO=protein_coding_gene | is_pseudo=false	0.002	FALSE	4.119	8	2	2	2	283	33.7	10.33	2	2	1.482	0.57	0.998957	402345	596092	41.72	14.92	545295	296870	536193	662682	100545	33712.9	202816	662682	Peak Found	Peak Found	Peak Found	High	1
TGGT1_245620	transcript=TGGT1_245620-t26_1 | gene=TGGT1_245620 | organism=Toxoplasma_gondii_GT1 | gene_product=Ubiquitin-like domain-containing protein [Source:UniProtKB/TrEMBL;Acc:A0A125YIT6] | transcript_product=ribosomal-ubiquitin protein RPS27A | location=TGGT1_chrXII:2372961-2375071(-) | protein_length=154 | sequence_SO=chromosome | SO=protein_coding_gene | is_pseudo=false	0.014	FALSE	1.972	8	1	1	1	154	17.3	8.9	0	1	1.482	0.57	0.998957	252495	374146	27.83	5.01	308210	206852	361126	387636	56829.9	23490.4	136597	387636	Peak Found	Peak Found	Peak Found	High	1	Methylthio [C126]
TGGT1_273120	transcript=TGGT1_273120-t26_1 | gene=TGGT1_273120 | organism=Toxoplasma_gondii_GT1 | gene_product=SAG-related sequence SRS30C [Source:UniProtKB/TrEMBL;Acc:S7V443] | transcript_product=SAG-related sequence SRS30C | location=TGGT1_chrVIII:3643884-3645008(-) | protein_length=374 | sequence_SO=chromosome | SO=protein_coding_gene | is_pseudo=false	0.004	FALSE	2.639	3	1	1	1	374	39.8	6.1	0	1	1.481	0.57	0.998957	112110	166016	26.23	1.8	135252	92927.9	163915	168144	24938.6	10553	62001.3	168144	Peak Found	Peak Found	High	Peak Found	1
TGGT1_215775	transcript=TGGT1_215775-t26_1 | gene=TGGT1_215775 | organism=Toxoplasma_gondii_GT1 | gene_product=Protein kinase domain-containing protein [Source:UniProtKB/TrEMBL;Acc:A0A125YM30] | transcript_product=rhoptry protein ROP8 | location=TGGT1_chrX:7045451-7047178(+) | protein_length=575 | sequence_SO=chromosome | SO=protein_coding_gene | is_pseudo=false	0	FALSE	18.005	13	5	18	2	575	65.4	9.09	15.08	5	1.475	0.56	0.998957	402047	592953	28.21	8.88	328448	492139	556805	631448	60561.6	55887.8	210613	631448	High	Peak Found	High	High	1
TGGT1_293510	transcript=TGGT1_293510-t26_1 | gene=TGGT1_293510 | organism=Toxoplasma_gondii_GT1 | gene_product=Poly(ADP-ribose) polymerase and DNA-Ligase Zn-finger region domain-containing protein [Source:UniProtKB/TrEMBL;Acc:S7UHM3] | transcript_product=poly(ADP-ribose) polymerase and DNA-Ligase Zn-finger region domain-containing protein | location=TGGT1_chrIa:371571-373049(-) | protein_length=392 | sequence…	0	FALSE	12.917	12	4	7	4	392	43.8	9.36	3.44	4	1.462	0.55	0.998957	940862	1.37511e+06	12.33	1.49	862124	1.02679e+06	1.38966e+06	1.36071e+06	158964	116604	525643	1.36071e+06	Peak Found	Peak Found	High	High	1	Phospho [T205]
TGGT1_222000	transcript=TGGT1_222000-t26_1 | gene=TGGT1_222000 | organism=Toxoplasma_gondii_GT1 | gene_product=Brix domain-containing protein [Source:UniProtKB/TrEMBL;Acc:S7UL49] | transcript_product=brix domain-containing protein | location=TGGT1_chrII:726106-731963(-) | protein_length=508 | sequence_SO=chromosome | SO=protein_coding_gene | is_pseudo=false	0.013	FALSE	2.064	2	1	1	1	508	57.4	6.71	0	1	1.461	0.55	0.998957	113037	165105	53.15	2.66	167821	76136.5	168240	162028	30944	8646.15	63637.4	162028	Peak Found	Peak Found	Peak Found	High	1
TGGT1_260320	transcript=TGGT1_260320-t26_1 | gene=TGGT1_260320 | organism=Toxoplasma_gondii_GT1 | gene_product=Noc2p family protein [Source:UniProtKB/TrEMBL;Acc:S7W780] | transcript_product=Noc2p family protein | location=TGGT1_chrVIIb:2326057-2331884(+) | protein_length=1036 | sequence_SO=chromosome | SO=protein_coding_gene | is_pseudo=false	0	FALSE	10.207	7	5	6	5	1036	115.2	8.84	0	5	1.459	0.55	0.998957	564226	823468	48.42	21.93	806140	394907	704279	962829	148642	44846.2	266395	962829	Peak Found	Peak Found	High	High	1
TGGT1_242790B	transcript=TGGT1_242790B-t26_1 | gene=TGGT1_242790B | organism=Toxoplasma_gondii_GT1 | gene_product=Putative trichohyalin [Source:UniProtKB/TrEMBL;Acc:S7W0Q0] | transcript_product=putative trichohyalin | location=TGGT1_chrVI:2203881-2217509(+) | protein_length=1214 | sequence_SO=chromosome | SO=protein_coding_gene | is_pseudo=false	0	FALSE	5.424	2	3	3	3	1214	137.6	5.11	0	3	1.458	0.54	0.998957	504433	735580	22.26	0.23	591220	430386	736803	734358	109013	48875.1	278697	734358	Peak Found	Peak Found	Peak Found	High	1
TGGT1_269290	transcript=TGGT1_269290-t26_1 | gene=TGGT1_269290 | organism=Toxoplasma_gondii_GT1 | gene_product=hypothetical protein | transcript_product=hypothetical protein | location=TGGT1_chrVIII:5927256-5944753(-) | protein_length=4668 | sequence_SO=chromosome | SO=protein_coding_gene | is_pseudo=false	0	FALSE	8.379	1	4	4	4	4668	503	6.64	0	4	1.458	0.54	0.998957	252274	367812	57.7	24.34	389046	163586	309125	437640	71735	18577	116927	437640	Peak Found	Peak Found	Peak Found	High	1
TGGT1_272030B	transcript=TGGT1_272030B-t26_1 | gene=TGGT1_272030B | organism=Toxoplasma_gondii_GT1 | gene_product=Kelch repeat-containing protein [Source:UniProtKB/TrEMBL;Acc:S7V3S1] | transcript_product=kelch repeat-containing protein | location=TGGT1_chrVIII:4200814-4202673(-) | protein_length=385 | sequence_SO=chromosome | SO=protein_coding_gene | is_pseudo=false	0.005	FALSE	2.619	10	1	1	1	385	40.1	8.25	2.07	1	1.458	0.54	0.998957	201186	293294	39.14	19.36	267308	151420	336625	255540	49288	17195.5	127329	255540	Peak Found	Peak Found	Peak Found	High	1	Methylthio [C162; C177; C192; C207; C336; C351; C366]
TGGT1_309570	transcript=TGGT1_309570-t26_1 | gene=TGGT1_309570 | organism=Toxoplasma_gondii_GT1 | gene_product=DEAD/DEAH box helicase domain-containing protein [Source:UniProtKB/TrEMBL;Acc:S7USV3] | transcript_product=DEAD/DEAH box helicase domain-containing protein | location=TGGT1_chrXI:692622-695126(-) | protein_length=834 | sequence_SO=chromosome | SO=protein_coding_gene | is_pseudo=false	0	FALSE	11.862	6	5	5	5	834	91.2	9.11	1.92	5	1.456	0.54	0.998957	651421	948330	37.49	6.13	854674	496505	908108	990332	157591	56383.7	343494	990332	Peak Found	Peak Found	Peak Found	High	1
TGGT1_243730	transcript=TGGT1_243730-t26_1 | gene=TGGT1_243730 | organism=Toxoplasma_gondii_GT1 | gene_product=Rhoptry protein ROP9 [Source:UniProtKB/TrEMBL;Acc:S7UG40] | transcript_product=rhoptry protein ROP9 | location=TGGT1_chrVI:2733555-2736099(+) | protein_length=353 | sequence_SO=chromosome | SO=protein_coding_gene | is_pseudo=false	0.034	FALSE	1.57	3	1	2	1	353	37.7	8.31	0	1	1.454	0.54	0.998957	157425	228909	31.61	2.15	197617	125407	225454	232417	36438	14241.4	85278.7	232417	Peak Found	Peak Found	High	High	1
TGGT1_232300	transcript=TGGT1_232300-t26_1 | gene=TGGT1_232300 | organism=Toxoplasma_gondii_GT1 | gene_product=KH type-2 domain-containing protein [Source:UniProtKB/TrEMBL;Acc:S7V3B5] | transcript_product=ribosomal protein RPS3 | location=TGGT1_chrVIII:1993673-1994649(-) | protein_length=255 | sequence_SO=chromosome | SO=protein_coding_gene | is_pseudo=false	0	FALSE	27.059	42	9	24	9	255	28.6	9.45	24.17	9	1.453	0.54	0.998957	9.45514e+06	1.37342e+07	1.75	1.6	9.33855e+06	9.57318e+06	1.38901e+07	1.358e+07	1.72191e+06	1.08714e+06	5.25397e+06	1.358e+07	High	High	High	High	1	Methylthio [C119; C141; C156]
TGGT1_219150	transcript=TGGT1_219150-t26_1 | gene=TGGT1_219150 | organism=Toxoplasma_gondii_GT1 | gene_product=ZZ-type domain-containing protein [Source:UniProtKB/TrEMBL;Acc:S7WAE6] | transcript_product=zinc finger, zz type domain-containing protein | location=TGGT1_chrXII:1042433-1047423(-) | protein_length=843 | sequence_SO=chromosome | SO=protein_coding_gene | is_pseudo=false	0	FALSE	6.565	5	3	3	3	843	96	5.34	0	3	1.449	0.54	0.998957	299899	434636	54.57	2.6	450512	199638	426707	442712	83068.6	22671.1	161403	442712	Peak Found	Peak Found	Peak Found	High	1
TGGT1_236210	transcript=TGGT1_236210-t26_1 | gene=TGGT1_236210 | organism=Toxoplasma_gondii_GT1 | gene_product=Putative peptidase M16 family potein [Source:UniProtKB/TrEMBL;Acc:S7W617] | transcript_product=putative peptidase M16 family potein | location=TGGT1_chrX:5216353-5222014(+) | protein_length=509 | sequence_SO=chromosome | SO=protein_coding_gene | is_pseudo=false	0	FALSE	6.419	6	3	3	3	509	56.9	6.6	1.71	3	1.448	0.53	0.998957	376225	544902	31.23	0.91	300570	470923	541416	548410	55421.2	53478.6	204792	548410	Peak Found	Peak Found	Peak Found	High	1
TGGT1_226860	transcript=TGGT1_226860-t26_1 | gene=TGGT1_226860 | organism=Toxoplasma_gondii_GT1 | gene_product=SAG-related sequence SRS67 [Source:UniProtKB/TrEMBL;Acc:S7W5K4] | transcript_product=SAG-related sequence SRS67 | location=TGGT1_chrX:1192695-1193327(-) | protein_length=210 | sequence_SO=chromosome | SO=protein_coding_gene | is_pseudo=false	0	FALSE	12.427	38	5	8	5	210	23	8	4.55	5	1.446	0.53	0.998957	1.85334e+06	2.67924e+06	28.51	4.61	2.27365e+06	1.51073e+06	2.76796e+06	2.59337e+06	419231	171561	1.04699e+06	2.59337e+06	High	High	High	High	1	Methylthio [C79; C80; C87; C141]
TGGT1_232710	transcript=TGGT1_232710-t26_1 | gene=TGGT1_232710 | organism=Toxoplasma_gondii_GT1 | gene_product=40S ribosomal protein S3a [Source:UniProtKB/TrEMBL;Acc:A0A125YZM8] | transcript_product=ribosomal protein RPS3A | location=TGGT1_chrVIII:2231374-2232762(+) | protein_length=259 | sequence_SO=chromosome | SO=protein_coding_gene | is_pseudo=false	0	FALSE	31.397	40	10	22	10	259	29.4	9.57	21.6	10	1.445	0.53	0.998957	9.72737e+06	1.40596e+07	2.82	13.45	9.92344e+06	9.53517e+06	1.27803e+07	1.54669e+07	1.82975e+06	1.08283e+06	4.83418e+06	1.54669e+07	High	High	High	High	1	Methylthio [C87; C88; C96; C154]
TGGT1_294710	transcript=TGGT1_294710-t26_1 | gene=TGGT1_294710 | organism=Toxoplasma_gondii_GT1 | gene_product=RNA recognition motif-containing protein [Source:UniProtKB/TrEMBL;Acc:A0A125YVJ2] | transcript_product=RNA recognition motif-containing protein | location=TGGT1_chrIa:1067961-1074404(-) | protein_length=1151 | sequence_SO=chromosome | SO=protein_coding_gene | is_pseudo=false	0	FALSE	28.503	12	10	14	10	1151	122	11.11	14.24	10	1.443	0.53	0.998957	1.7859e+06	2.57654e+06	0.11	0.85	1.78456e+06	1.78724e+06	2.59204e+06	2.56114e+06	329049	202962	980445	2.56114e+06	Peak Found	Peak Found	High	High	1
TGGT1_261430	transcript=TGGT1_261430-t26_1 | gene=TGGT1_261430 | organism=Toxoplasma_gondii_GT1 | gene_product=hypothetical protein | transcript_product=hypothetical protein | location=TGGT1_chrVIIb:1731479-1735470(-) | protein_length=1072 | sequence_SO=chromosome | SO=protein_coding_gene | is_pseudo=false	0.037	FALSE	1.495	1	1	1	1	1072	117.2	9.52	1.73	1	1.442	0.53	0.998957	129103	186224	10.22	4.06	138794	120088	191651	180952	25591.8	13637.4	72492.3	180952	Peak Found	Peak Found	Peak Found	High	1
TGGT1_221620	transcript=TGGT1_221620-t26_1 | gene=TGGT1_221620 | organism=Toxoplasma_gondii_GT1 | gene_product=Tubulin beta chain [Source:UniProtKB/TrEMBL;Acc:A0A125YYZ4] | transcript_product=putative beta-tubulin | location=TGGT1_chrII:472166-474503(-) | protein_length=449 | sequence_SO=chromosome | SO=protein_coding_gene | is_pseudo=false	0	FALSE	89.664	65	22	101	8	449	50	4.81	172.38	22	1.441	0.53	0.998957	2.61413e+07	3.7668e+07	52.34	7.57	3.85546e+07	1.77246e+07	3.5703e+07	3.97411e+07	7.10896e+06	2.01283e+06	1.35047e+07	3.97411e+07	High	High	High	High	1	Methylthio [C12; C238; C301; C314; C354]
TGGT1_300190	transcript=TGGT1_300190-t26_1 | gene=TGGT1_300190 | organism=Toxoplasma_gondii_GT1 | gene_product=Ribosomal protein RPL37A [Source:UniProtKB/TrEMBL;Acc:A0A125YTT2] | transcript_product=ribosomal protein RPL37A | location=TGGT1_chrXII:125333-127624(+) | protein_length=96 | sequence_SO=chromosome | SO=protein_coding_gene | is_pseudo=false	0.032	FALSE	1.673	8	1	1	1	96	10.4	10.76	0	1	1.44	0.53	0.998957	140306	201982	42.15	21.42	190788	103182	235285	173393	35178.8	11717.5	88997.2	173393	Peak Found	Peak Found	Peak Found	High	1	Methylthio [C39; C42]
TGGT1_306400	transcript=TGGT1_306400-t26_1 | gene=TGGT1_306400 | organism=Toxoplasma_gondii_GT1 | gene_product=C3H1-type domain-containing protein [Source:UniProtKB/TrEMBL;Acc:S7UHB0] | transcript_product=hypothetical protein | location=TGGT1_chrIX:5832391-5837378(+) | protein_length=1403 | sequence_SO=chromosome | SO=protein_coding_gene | is_pseudo=false	0	FALSE	5.602	2	2	2	2	1403	152.1	11.15	1.75	2	1.437	0.52	0.998957	221751	318707	NA	13.76	221751	NA	289059	351395	40887.9	NA	109337	351395	Peak Found	Not Found	Peak Found	High	1
TGGT1_314260	transcript=TGGT1_314260-t26_1 | gene=TGGT1_314260 | organism=Toxoplasma_gondii_GT1 | gene_product=hypothetical protein | transcript_product=hypothetical protein | location=TGGT1_chrXI:3928370-3929011(+) | protein_length=213 | sequence_SO=chromosome | SO=protein_coding_gene | is_pseudo=false	0	FALSE	5.173	13	2	2	2	213	23.8	10.01	0	2	1.437	0.52	0.998957	378744	544325	36.26	4.78	492317	291371	563043	526229	90776.7	33088.5	212973	526229	Peak Found	Peak Found	Peak Found	High	1
TGGT1_222300	transcript=TGGT1_222300-t26_1 | gene=TGGT1_222300 | organism=Toxoplasma_gondii_GT1 | gene_product=hypothetical protein | transcript_product=hypothetical protein | location=TGGT1_chrII:997106-1002828(-) | protein_length=1468 | sequence_SO=chromosome | SO=protein_coding_gene | is_pseudo=false	0.013	FALSE	2.14	1	1	1	1	1468	159	5.64	0	1	1.435	0.52	0.998957	154245	221273	65.13	11.47	253791	93745.1	240014	203995	46795.7	10645.8	90786.1	203995	Peak Found	Peak Found	Peak Found	High	1
TGGT1_297960B	transcript=TGGT1_297960B-t26_1 | gene=TGGT1_297960B | organism=Toxoplasma_gondii_GT1 | gene_product=Rhoptry neck protein RON6 [Source:UniProtKB/TrEMBL;Acc:S7UJX5] | transcript_product=rhoptry neck protein RON6 | location=TGGT1_chrII:2107572-2113518(-) | protein_length=718 | sequence_SO=chromosome | SO=protein_coding_gene | is_pseudo=false	0	FALSE	5.114	23	2	3	1	718	77.5	5.74	0	2	1.431	0.52	0.998957	183222	262130	45.64	7.88	256056	131105	277169	247906	47213.5	14888.4	104840	247906	Peak Found	Peak Found	Peak Found	High	1
TGGT1_297745	transcript=TGGT1_297745-t26_1 | gene=TGGT1_297745 | organism=Toxoplasma_gondii_GT1 | gene_product=hypothetical protein | transcript_product=hypothetical protein | location=TGGT1_chrII:1939393-1956115(-) | protein_length=3869 | sequence_SO=chromosome | SO=protein_coding_gene | is_pseudo=false	0	FALSE	41.619	6	17	19	17	3869	413.4	6.65	5.42	17	1.43	0.52	0.998957	2.87522e+06	4.11182e+06	18.88	0.91	3.28841e+06	2.51395e+06	4.13842e+06	4.08539e+06	606340	285487	1.56537e+06	4.08539e+06	High	Peak Found	High	High	1
TGGT1_239010	transcript=TGGT1_239010-t26_1 | gene=TGGT1_239010 | organism=Toxoplasma_gondii_GT1 | gene_product=hypothetical protein | transcript_product=hypothetical protein | location=TGGT1_chrVI:386043-388100(-) | protein_length=685 | sequence_SO=chromosome | SO=protein_coding_gene | is_pseudo=false	0	FALSE	5.655	8	2	2	2	685	70.7	9.58	2.36	2	1.428	0.51	0.998957	334581	477707	12	6.57	307291	364295	456022	500424	56660.4	41369.7	172491	500424	Peak Found	Peak Found	Peak Found	High	1
TGGT1_268640	transcript=TGGT1_268640-t26_1 | gene=TGGT1_268640 | organism=Toxoplasma_gondii_GT1 | gene_product=WD_REPEATS_REGION domain-containing protein [Source:UniProtKB/TrEMBL;Acc:A0A125YTY9] | transcript_product=BING4CT (NUC141) domain-containing protein | location=TGGT1_chrVIII:6377589-6384854(-) | protein_length=568 | sequence_SO=chromosome | SO=protein_coding_gene | is_pseudo=false	0.004	FALSE	2.738	2	1	1	1	568	64.5	9.52	0	1	1.428	0.51	0.998957	165759	236679	39.87	5.97	221467	124064	246890	226890	40835.6	14088.8	93386.8	226890	Peak Found	Peak Found	Peak Found	High	1
TGGT1_312530	transcript=TGGT1_312530-t26_1 | gene=TGGT1_312530 | organism=Toxoplasma_gondii_GT1 | gene_product=Splicing factor, CC1 family protein [Source:UniProtKB/TrEMBL;Acc:S7W8F0] | transcript_product=splicing factor, CC1 family protein | location=TGGT1_chrXI:2728437-2730600(+) | protein_length=633 | sequence_SO=chromosome | SO=protein_coding_gene | is_pseudo=false	0	FALSE	10.426	7	4	5	4	633	69.3	8.31	5.2	4	1.422	0.51	0.998957	847455	1.2055e+06	16.07	3.99	949929	756035	1.17193e+06	1.24004e+06	175154	85856.3	443284	1.24004e+06	High	Peak Found	Peak Found	High	1
TGGT1_254650	transcript=TGGT1_254650-t26_1 | gene=TGGT1_254650 | organism=Toxoplasma_gondii_GT1 | gene_product=Zinc finger protein [Source:UniProtKB/TrEMBL;Acc:S7UM59] | transcript_product=zinc finger protein | location=TGGT1_chrIII:1855820-1857469(+) | protein_length=400 | sequence_SO=chromosome | SO=protein_coding_gene | is_pseudo=false	0.048	FALSE	1.409	3	1	1	1	400	44.6	8.41	0	1	1.413	0.5	0.998957	165226	233542	18.38	12.83	188295	144984	255775	213241	34719	16464.5	96747.5	213241	Peak Found	Peak Found	Peak Found	High	1
TGGT1_304760	transcript=TGGT1_304760-t26_1 | gene=TGGT1_304760 | organism=Toxoplasma_gondii_GT1 | gene_product=RNA recognition motif-containing protein [Source:UniProtKB/TrEMBL;Acc:S7W2V6] | transcript_product=RNA recognition motif-containing protein | location=TGGT1_chrVIIa:667907-675253(+) | protein_length=1335 | sequence_SO=chromosome | SO=protein_coding_gene | is_pseudo=false	0	FALSE	15.703	5	6	8	6	1335	147	6.16	9.92	6	1.413	0.5	0.998957	764996	1.08092e+06	9.87	9.3	820380	713350	1.01205e+06	1.15448e+06	151267	81008.9	382810	1.15448e+06	Peak Found	Peak Found	High	High	1	Methylthio [C1154]
TGGT1_272520	transcript=TGGT1_272520-t26_1 | gene=TGGT1_272520 | organism=Toxoplasma_gondii_GT1 | gene_product=hypothetical protein | transcript_product=hypothetical protein | location=TGGT1_chrVIII:3922939-3924461(+) | protein_length=401 | sequence_SO=chromosome | SO=protein_coding_gene | is_pseudo=false	0	FALSE	6.232	11	3	3	3	401	43.7	5.47	1.85	3	1.411	0.5	0.998957	335762	473766	48.63	8.11	480538	234604	501754	447339	88604.8	26641.9	189790	447339	Peak Found	Peak Found	Peak Found	High	1	Methylthio [C117]
TGGT1_288460	transcript=TGGT1_288460-t26_1 | gene=TGGT1_288460 | organism=Toxoplasma_gondii_GT1 | gene_product=hypothetical protein | transcript_product=hypothetical protein | location=TGGT1_chrIX:2367582-2381598(+) | protein_length=1816 | sequence_SO=chromosome | SO=protein_coding_gene | is_pseudo=false	0.037	FALSE	1.515	0	1	1	1	1816	198.2	6.47	0	1	1.41	0.5	0.998957	167379	235947	0.06	2.25	167453	167306	239733	232221	30876.1	18999.5	90679.5	232221	Peak Found	Peak Found	Peak Found	High	1
TGGT1_310070	transcript=TGGT1_310070-t26_1 | gene=TGGT1_310070 | organism=Toxoplasma_gondii_GT1 | gene_product=Methyltranfer_dom domain-containing protein [Source:UniProtKB/TrEMBL;Acc:A0A125YVY5] | transcript_product=putative methyltransferase | location=TGGT1_chrXI:1000351-1003674(-) | protein_length=224 | sequence_SO=chromosome | SO=protein_coding_gene | is_pseudo=false	0	FALSE	10.334	20	4	7	4	224	25.3	5.68	5.72	4	1.41	0.5	0.998957	871051	1.22844e+06	22.7	14.21	1.02417e+06	740824	1.11066e+06	1.35871e+06	188844	84128.8	420109	1.35871e+06	High	Peak Found	High	High	1	Methylthio [C76]
TGGT1_232260	transcript=TGGT1_232260-t26_1 | gene=TGGT1_232260 | organism=Toxoplasma_gondii_GT1 | gene_product=hypothetical protein | transcript_product=hypothetical protein | location=TGGT1_chrVIII:1978812-1980484(-) | protein_length=306 | sequence_SO=chromosome | SO=protein_coding_gene | is_pseudo=false	0.008	FALSE	2.452	4	1	1	1	306	32.3	7.96	0	1	1.408	0.49	0.998957	82369.6	115994	NA	5.98	82369.6	NA	111193	121004	15187.9	NA	42058.9	121004	Peak Found	Not Found	Peak Found	High	1
TGGT1_269190	transcript=TGGT1_269190-t26_1 | gene=TGGT1_269190 | organism=Toxoplasma_gondii_GT1 | gene_product=Gp_dh_N domain-containing protein [Source:UniProtKB/TrEMBL;Acc:S7WDK9] | transcript_product=glyceraldehyde-3-phosphate dehydrogenase GAPDH2 | location=TGGT1_chrVIII:6001367-6005276(-) | protein_length=995 | sequence_SO=chromosome | SO=protein_coding_gene | is_pseudo=false	0	FALSE	24.531	10	9	12	8	995	105.1	5.05	10.19	9	1.408	0.49	0.998957	1.83982e+06	2.5898e+06	40.9	14.98	2.47788e+06	1.36606e+06	2.32865e+06	2.88024e+06	456889	155132	880817	2.88024e+06	Peak Found	Peak Found	High	High	1	Methylthio [C893]
TGGT1_290920	transcript=TGGT1_290920-t26_1 | gene=TGGT1_290920 | organism=Toxoplasma_gondii_GT1 | gene_product=Fe2OG dioxygenase domain-containing protein [Source:UniProtKB/TrEMBL;Acc:S7UPA3] | transcript_product=oxidoreductase, 2OG-Fe(II) oxygenase family protein | location=TGGT1_chrIX:3746594-3750759(+) | protein_length=967 | sequence_SO=chromosome | SO=protein_coding_gene | is_pseudo=false	0	FALSE	5.637	1	2	2	2	967	100.8	9.41	1.86	2	1.405	0.49	0.998957	239626	336660	0.37	4.53	240253	239002	326047	347619	44299.5	27141.3	123328	347619	Peak Found	Peak Found	Peak Found	High	1
TGGT1_227810	transcript=TGGT1_227810-t26_1 | gene=TGGT1_227810 | organism=Toxoplasma_gondii_GT1 | gene_product=Protein kinase domain-containing protein [Source:UniProtKB/TrEMBL;Acc:S7W5X8] | transcript_product=rhoptry kinase family protein ROP11 (incomplete catalytic triad) | location=TGGT1_chrX:715479-717059(+) | protein_length=526 | sequence_SO=chromosome | SO=protein_coding_gene | is_pseudo=false	0	FALSE	26.635	25	10	16	10	526	58.2	8.4	9.81	10	1.404	0.49	0.998957	3.29515e+06	4.62599e+06	32.04	6.3	4.14971e+06	2.61658e+06	4.42435e+06	4.83682e+06	765152	297142	1.67352e+06	4.83682e+06	High	High	High	High	1	Methylthio [C327; C396]
TGGT1_214200	transcript=TGGT1_214200-t26_1 | gene=TGGT1_214200 | organism=Toxoplasma_gondii_GT1 | gene_product=WD domain, G-beta repeat-containing protein [Source:UniProtKB/TrEMBL;Acc:S7UR27] | transcript_product=WD domain, G-beta repeat-containing protein | location=TGGT1_chrX:5990148-5999891(-) | protein_length=1396 | sequence_SO=chromosome | SO=protein_coding_gene | is_pseudo=false	0.013	FALSE	2.235	1	1	1	1	1396	150.4	5.64	0	1	1.4	0.49	0.998957	60138	84169	34.18	3.5	76954.1	46996.6	86280	82109.6	14189.3	5336.99	32635.6	82109.6	Peak Found	Peak Found	Peak Found	High	1
TGGT1_233030	transcript=TGGT1_233030-t26_1 | gene=TGGT1_233030 | organism=Toxoplasma_gondii_GT1 | gene_product=Gliding-associated protein GAP70 [Source:UniProtKB/TrEMBL;Acc:S7V3S7] | transcript_product=gliding-associated protein GAP70 | location=TGGT1_chrVIII:2349458-2350423(-) | protein_length=321 | sequence_SO=chromosome | SO=protein_coding_gene | is_pseudo=false	0.013	FALSE	2.191	3	1	1	1	321	38.6	5.07	0	1	1.4	0.49	0.998957	90766.7	127076	46.48	14.18	127690	64520.3	114915	140525	23544.4	7327	43466.9	140525	Peak Found	Peak Found	Peak Found	High	1
TGGT1_270840	transcript=TGGT1_270840-t26_1 | gene=TGGT1_270840 | organism=Toxoplasma_gondii_GT1 | gene_product=Poly [ADP-ribose] polymerase [Source:UniProtKB/TrEMBL;Acc:S7V536] | transcript_product=poly(ADP-ribose) polymerase catalytic domain-containing protein | location=TGGT1_chrVIII:4946767-4963422(+) | protein_length=1012 | sequence_SO=chromosome | SO=protein_coding_gene | is_pseudo=false	0	FALSE	20.619	9	9	10	9	1012	113.3	8.79	3.61	9	1.4	0.49	0.998957	914518	1.28e+06	5.91	8.95	953570	877065	1.20144e+06	1.3637e+06	175826	99600.5	454446	1.3637e+06	Peak Found	Peak Found	High	High	1
TGGT1_261440	transcript=TGGT1_261440-t26_1 | gene=TGGT1_261440 | organism=Toxoplasma_gondii_GT1 | gene_product=ARM repeats containing protein [Source:UniProtKB/TrEMBL;Acc:A0A125YNN4] | transcript_product=ARM repeats containing protein | location=TGGT1_chrVIIb:1723817-1729239(+) | protein_length=274 | sequence_SO=chromosome | SO=protein_coding_gene | is_pseudo=false	0	FALSE	8.835	12	3	4	3	274	30.5	5.11	5.78	3	1.394	0.48	0.998957	659682	919390	19.22	9.03	756364	575358	862449	980090	139464	65338.4	326224	980090	Peak Found	Peak Found	High	High	1
TGGT1_270640	transcript=TGGT1_270640-t26_1 | gene=TGGT1_270640 | organism=Toxoplasma_gondii_GT1 | gene_product=RRM domain-containing protein [Source:UniProtKB/TrEMBL;Acc:A0A125YWZ3] | transcript_product=RNA recognition motif-containing protein | location=TGGT1_chrVIII:5107551-5110685(+) | protein_length=208 | sequence_SO=chromosome | SO=protein_coding_gene | is_pseudo=false	0.032	FALSE	1.623	5	1	1	1	208	24.5	10.73	0	1	1.394	0.48	0.998957	403972	562989	10.19	13.28	434211	375839	618607	512371	80062.9	42680.8	233990	512371	Peak Found	Peak Found	Peak Found	High	1	Methylthio [C13]
TGGT1_270770	transcript=TGGT1_270770-t26_1 | gene=TGGT1_270770 | organism=Toxoplasma_gondii_GT1 | gene_product=PWI domain-containing protein [Source:UniProtKB/TrEMBL;Acc:S7WD91] | transcript_product=PWI domain-containing protein | location=TGGT1_chrVIII:4997193-5006045(-) | protein_length=782 | sequence_SO=chromosome | SO=protein_coding_gene | is_pseudo=false	0	FALSE	4.572	3	2	2	2	782	87.1	6.98	0	2	1.392	0.48	0.998957	217527	302900	40.97	18.61	293111	161434	265354	345758	54045.8	18332.6	100371	345758	Peak Found	Peak Found	Peak Found	High	1
TGGT1_233520	transcript=TGGT1_233520-t26_1 | gene=TGGT1_233520 | organism=Toxoplasma_gondii_GT1 | gene_product=ATP-dependent RNA helicase [Source:UniProtKB/TrEMBL;Acc:S7V2Z5] | transcript_product=ATP-dependent RNA helicase | location=TGGT1_chrVIII:2686087-2689735(+) | protein_length=801 | sequence_SO=chromosome | SO=protein_coding_gene | is_pseudo=false	0	FALSE	4.29	2	2	3	2	801	88.8	7.68	0	2	1.391	0.48	0.998957	800074	1.11274e+06	22.05	21.09	936274	683688	957486	1.29318e+06	172637	77640.5	362172	1.29318e+06	Peak Found	Peak Found	High	High	1
TGGT1_294340	transcript=TGGT1_294340-t26_1 | gene=TGGT1_294340 | organism=Toxoplasma_gondii_GT1 | gene_product=hypothetical protein | transcript_product=hypothetical protein | location=TGGT1_chrIa:797278-800698(+) | protein_length=345 | sequence_SO=chromosome | SO=protein_coding_gene | is_pseudo=false	0.052	FALSE	1.385	3	1	1	1	345	37.7	4.94	0	1	1.391	0.48	0.998957	97659.5	135805	52.75	2.48	144520	65993.3	133442	138209	26647.7	7494.28	50474.7	138209	Peak Found	Peak Found	Peak Found	High	1
TGGT1_273840	transcript=TGGT1_273840-t26_1 | gene=TGGT1_273840 | organism=Toxoplasma_gondii_GT1 | gene_product=Brix domain-containing protein [Source:UniProtKB/TrEMBL;Acc:S7WCI1] | transcript_product=brix domain-containing protein | location=TGGT1_chrVIII:3225330-3229435(-) | protein_length=673 | sequence_SO=chromosome | SO=protein_coding_gene | is_pseudo=false	0	FALSE	5.74	4	3	3	3	673	73.7	9.42	0	3	1.389	0.47	0.998957	401986	558189	33.41	9.49	315969	511420	521897	597006	58260.5	58077.5	197409	597006	Peak Found	Peak Found	Peak Found	High	1
TGGT1_270380	transcript=TGGT1_270380-t26_1 | gene=TGGT1_270380 | organism=Toxoplasma_gondii_GT1 | gene_product=Ribosomal_S13_N domain-containing protein [Source:UniProtKB/TrEMBL;Acc:S7V498] | transcript_product=ribosomal protein RPS13 | location=TGGT1_chrVIII:5238468-5240728(-) | protein_length=151 | sequence_SO=chromosome | SO=protein_coding_gene | is_pseudo=false	0	FALSE	17.16	44	6	12	6	151	17.2	10.55	14.35	6	1.387	0.47	0.998957	5.72852e+06	7.94831e+06	18.07	5.35	6.5137e+06	5.038e+06	7.65291e+06	8.25511e+06	1.20104e+06	572121	2.89473e+06	8.25511e+06	High	Peak Found	High	High	1
TGGT1_297430	transcript=TGGT1_297430-t26_1 | gene=TGGT1_297430 | organism=Toxoplasma_gondii_GT1 | gene_product=FoP_duplication domain-containing protein [Source:UniProtKB/TrEMBL;Acc:S7UK03] | transcript_product=hypothetical protein | location=TGGT1_chrII:1749482-1752364(+) | protein_length=248 | sequence_SO=chromosome | SO=protein_coding_gene | is_pseudo=false	0	FALSE	10.814	21	4	5	4	248	25.3	11.63	3.46	4	1.387	0.47	0.998957	4.92005e+06	6.82447e+06	6.99	4.66	5.16973e+06	4.68243e+06	6.6034e+06	7.05293e+06	953231	531743	2.49775e+06	7.05293e+06	High	Peak Found	High	High	1
TGGT1_206610	transcript=TGGT1_206610-t26_1 | gene=TGGT1_206610 | organism=Toxoplasma_gondii_GT1 | gene_product=Dihydrolipoamide acetyltransferase component of pyruvate dehydrogenase complex [Source:UniProtKB/TrEMBL;Acc:S7UTU2] | transcript_product=pyruvate dehydrogenase complex subunit PDH-E2 | location=TGGT1_chrVIIa:755999-763930(-) | protein_length=929 | sequence_SO=chromosome | SO=protein_coding_gene | is_…	0	FALSE	8.055	5	3	3	3	929	96.8	6.38	0	3	1.38	0.46	0.998957	288029	397417	18.43	2.91	328355	252656	405691	389311	60544.3	28691.9	153454	389311	Peak Found	Peak Found	Peak Found	High	1
TGGT1_239260	transcript=TGGT1_239260-t26_1 | gene=TGGT1_239260 | organism=Toxoplasma_gondii_GT1 | gene_product=Histone H4 [Source:UniProtKB/TrEMBL;Acc:A0A125YHU3] | transcript_product=histone H4 | location=TGGT1_chrVI:491746-492057(-) | protein_length=103 | sequence_SO=chromosome | SO=protein_coding_gene | is_pseudo=false	0	FALSE	32.132	51	6	61	6	103	11.4	11.36	89.06	6	1.379	0.46	0.998957	2.93159e+08	4.04291e+08	24.36	5.67	3.4886e+08	2.46352e+08	3.88388e+08	4.20845e+08	6.43253e+07	2.7976e+07	1.46909e+08	4.20845e+08	High	High	High	High	1
TGGT1_272350	transcript=TGGT1_272350-t26_1 | gene=TGGT1_272350 | organism=Toxoplasma_gondii_GT1 | gene_product=mRNA export protein [Source:UniProtKB/TrEMBL;Acc:A0A125YTD5] | transcript_product=mRNA export protein | location=TGGT1_chrVIII:4054234-4060874(-) | protein_length=375 | sequence_SO=chromosome | SO=protein_coding_gene | is_pseudo=false	0	FALSE	4.342	6	2	3	2	375	41.5	8.78	2.05	2	1.379	0.46	0.998957	370178	510421	37.12	6.21	484336	282926	488481	533346	89305.2	32129.4	184769	533346	Peak Found	Peak Found	High	High	1
TGGT1_233100	transcript=TGGT1_233100-t26_1 | gene=TGGT1_233100 | organism=Toxoplasma_gondii_GT1 | gene_product=Prohibitin [Source:UniProtKB/TrEMBL;Acc:A0A125YWW3] | transcript_product=SPFH domain / Band 7 family protein | location=TGGT1_chrVIII:2412652-2416916(-) | protein_length=290 | sequence_SO=chromosome | SO=protein_coding_gene | is_pseudo=false	0	FALSE	11.085	16	4	7	4	290	32	9.33	10.05	4	1.374	0.46	0.998957	1.50561e+06	2.06935e+06	45.08	9.31	2.09476e+06	1.08215e+06	2.21041e+06	1.9373e+06	386246	122890	836093	1.9373e+06	High	Peak Found	High	High	1
TGGT1_288530	transcript=TGGT1_288530-t26_1 | gene=TGGT1_288530 | organism=Toxoplasma_gondii_GT1 | gene_product=SAM_MT_RSMB_NOP domain-containing protein [Source:UniProtKB/TrEMBL;Acc:A0A125YRB9] | transcript_product=NOL1/NOP2/sun family protein | location=TGGT1_chrIX:2409169-2414972(+) | protein_length=804 | sequence_SO=chromosome | SO=protein_coding_gene | is_pseudo=false	0	FALSE	9.407	6	4	4	4	804	87.6	8.87	4.35	4	1.374	0.46	0.998957	370314	508929	80.55	58.28	193923	707150	328382	788741	35756.8	80304.8	124211	788741	Peak Found	Peak Found	Peak Found	High	1
TGGT1_319530	transcript=TGGT1_319530-t26_1 | gene=TGGT1_319530 | organism=Toxoplasma_gondii_GT1 | gene_product=Splicing factor SF2 [Source:UniProtKB/TrEMBL;Acc:S7UJA0] | transcript_product=splicing factor SF2 | location=TGGT1_chrIV:876124-882127(+) | protein_length=450 | sequence_SO=chromosome | SO=protein_coding_gene | is_pseudo=false	0	FALSE	14.119	14	5	9	5	450	53.5	10.07	8.45	5	1.373	0.46	0.998957	3.1574e+06	4.33514e+06	34.13	1.15	4.03873e+06	2.46839e+06	4.30006e+06	4.37052e+06	744689	280314	1.62651e+06	4.37052e+06	High	Peak Found	High	High	1
TGGT1_209210	transcript=TGGT1_209210-t26_1 | gene=TGGT1_209210 | organism=Toxoplasma_gondii_GT1 | gene_product=hypothetical protein | transcript_product=hypothetical protein | location=TGGT1_chrIb:1139917-1148599(+) | protein_length=1492 | sequence_SO=chromosome | SO=protein_coding_gene | is_pseudo=false	0	FALSE	7.099	3	3	3	3	1492	166.8	5.54	0	3	1.368	0.45	0.998957	350219	479224	20.76	2.29	406016	302091	471525	487048	74864	34305.8	178356	487048	Peak Found	Peak Found	Peak Found	High	1
TGGT1_212220	transcript=TGGT1_212220-t26_1 | gene=TGGT1_212220 | organism=Toxoplasma_gondii_GT1 | gene_product=hypothetical protein | transcript_product=hypothetical protein | location=TGGT1_chrX:3876902-3879847(+) | protein_length=981 | sequence_SO=chromosome | SO=protein_coding_gene | is_pseudo=false	0.001	FALSE	3.668	3	2	2	2	981	107.9	7.23	0	2	1.367	0.45	0.998957	210197	287373	32.36	11.77	265340	166515	264364	312383	48925.1	18909.6	99996.5	312383	Peak Found	Peak Found	Peak Found	High	1
TGGT1_297520	transcript=TGGT1_297520-t26_1 | gene=TGGT1_297520 | organism=Toxoplasma_gondii_GT1 | gene_product=Proteophosphoglycan PPG1 [Source:UniProtKB/TrEMBL;Acc:S7UKZ6] | transcript_product=proteophosphoglycan PPG1 | location=TGGT1_chrII:1824333-1834988(-) | protein_length=1495 | sequence_SO=chromosome | SO=protein_coding_gene | is_pseudo=false	0.001	FALSE	3.543	2	2	2	2	1495	160.6	7.74	0	2	1.367	0.45	0.998957	101816	139222	50.14	33.2	147496	70282.8	109600	176851	27196.3	7981.4	41456.3	176851	Peak Found	Peak Found	Peak Found	High	1
TGGT1_214210	transcript=TGGT1_214210-t26_1 | gene=TGGT1_214210 | organism=Toxoplasma_gondii_GT1 | gene_product=PUA domain-containing protein [Source:UniProtKB/TrEMBL;Acc:A0A125YRK0] | transcript_product=rRNA pseudouridine synthase | location=TGGT1_chrX:6002905-6008379(-) | protein_length=505 | sequence_SO=chromosome | SO=protein_coding_gene | is_pseudo=false	0	FALSE	37.177	28	11	21	11	505	56.7	9	9.04	11	1.366	0.45	0.998957	4.10237e+06	5.60533e+06	16.45	10.75	4.61087e+06	3.64995e+06	5.19421e+06	6.04898e+06	850185	414493	1.96472e+06	6.04898e+06	High	Peak Found	High	High	1	Methylthio [C415]
TGGT1_316400B	transcript=TGGT1_316400B-t26_1 | gene=TGGT1_316400B | organism=Toxoplasma_gondii_GT1 | gene_product=Tubulin alpha chain [Source:UniProtKB/TrEMBL;Acc:S7UL74] | transcript_product=alpha tubulin TUBA1 | location=TGGT1_chrXI:5219470-5220918(+) | protein_length=432 | sequence_SO=chromosome | SO=protein_coding_gene | is_pseudo=false	0	FALSE	85.893	64	21	104	21	432	47.8	5.05	210.99	21	1.365	0.45	0.998957	2.10632e+08	2.87452e+08	40.96	5.09	2.838e+08	1.56328e+08	2.97996e+08	2.77281e+08	5.23289e+07	1.77528e+07	1.12718e+08	2.77281e+08	High	High	High	High	1	Methylthio [C44; C326; C332; C355]
TGGT1_218820	transcript=TGGT1_218820-t26_1 | gene=TGGT1_218820 | organism=Toxoplasma_gondii_GT1 | gene_product=Alba domain-containing protein [Source:UniProtKB/TrEMBL;Acc:A0A125YFQ6] | transcript_product=alba 2 | location=TGGT1_chrXII:1217304-1219105(+) | protein_length=148 | sequence_SO=chromosome | SO=protein_coding_gene | is_pseudo=false	0	FALSE	8.364	25	4	5	4	148	15.4	8.43	3.51	4	1.361	0.44	0.998957	3.47044e+06	4.72199e+06	11.26	6.31	3.20428e+06	3.75871e+06	4.93754e+06	4.51584e+06	590828	426844	1.86764e+06	4.51584e+06	Peak Found	Peak Found	High	High	1	Methylthio [C118]
TGGT1_228130	transcript=TGGT1_228130-t26_1 | gene=TGGT1_228130 | organism=Toxoplasma_gondii_GT1 | gene_product=START domain-containing protein [Source:UniProtKB/TrEMBL;Acc:S7UX91] | transcript_product=hypothetical protein | location=TGGT1_chrX:462815-465944(+) | protein_length=761 | sequence_SO=chromosome | SO=protein_coding_gene | is_pseudo=false	0.032	FALSE	1.649	1	1	1	1	761	84	6.1	0	1	1.361	0.44	0.998957	129506	176254	NA	8.05	129506	NA	186585	166495	23879.3	NA	70576.2	166495	Peak Found	Not Found	Peak Found	High	1
TGGT1_267400	transcript=TGGT1_267400-t26_1 | gene=TGGT1_267400 | organism=Toxoplasma_gondii_GT1 | gene_product=Ribosomal protein RPL32 [Source:UniProtKB/TrEMBL;Acc:A0A125YTP3] | transcript_product=ribosomal protein RPL32 | location=TGGT1_chrIX:508439-508944(-) | protein_length=134 | sequence_SO=chromosome | SO=protein_coding_gene | is_pseudo=false	0	FALSE	10.825	33	4	6	4	134	15.6	11.03	6.48	4	1.361	0.44	0.998957	4.46438e+06	6.07577e+06	7.14	7.81	4.24432e+06	4.69584e+06	5.74897e+06	6.42115e+06	782597	533265	2.17456e+06	6.42115e+06	Peak Found	Peak Found	High	High	1
TGGT1_262620	transcript=TGGT1_262620-t26_1 | gene=TGGT1_262620 | organism=Toxoplasma_gondii_GT1 | gene_product=RNA recognition motif-containing protein [Source:UniProtKB/TrEMBL;Acc:A0A125YHM1] | transcript_product=RNA recognition motif-containing protein | location=TGGT1_chrVIIb:1093901-1096823(+) | protein_length=293 | sequence_SO=chromosome | SO=protein_coding_gene | is_pseudo=false	0	FALSE	28.223	39	10	29	10	293	31.7	9.07	30.46	10	1.36	0.44	0.998957	9.14074e+06	1.24299e+07	11.74	1.02	9.93418e+06	8.41066e+06	1.23402e+07	1.25203e+07	1.83173e+06	955125	4.66772e+06	1.25203e+07	High	High	High	High	1	Methylthio [C22; C64; C238]
TGGT1_210360	transcript=TGGT1_210360-t26_1 | gene=TGGT1_210360 | organism=Toxoplasma_gondii_GT1 | gene_product=DEAD (Asp-Glu-Ala-Asp) box polypeptide 41 family protein [Source:UniProtKB/TrEMBL;Acc:S7UPR4] | transcript_product=DEAD (Asp-Glu-Ala-Asp) box polypeptide 41 family protein | location=TGGT1_chrIX:4638505-4645559(-) | protein_length=657 | sequence_SO=chromosome | SO=protein_coding_gene | is_pseudo=false	0.004	FALSE	2.652	2	1	1	1	657	73.2	6.65	0	1	1.359	0.44	0.998957	113101	153649	NA	15.68	113101	NA	171745	137459	20854.4	NA	64962.9	137459	Peak Found	Not Found	Peak Found	High	1
TGGT1_235170	transcript=TGGT1_235170-t26_1 | gene=TGGT1_235170 | organism=Toxoplasma_gondii_GT1 | gene_product=Replication factor C subunit 1 [Source:UniProtKB/TrEMBL;Acc:S7W4E1] | transcript_product=ATPase, AAA family protein | location=TGGT1_chrX:4569043-4580176(+) | protein_length=1260 | sequence_SO=chromosome | SO=protein_coding_gene | is_pseudo=false	0	FALSE	8.108	5	4	5	4	1260	138.1	8.18	0	4	1.357	0.44	0.998957	509144	690970	30.6	3.24	408674	634314	675317	706986	75354.2	72033.5	255440	706986	Peak Found	Peak Found	High	High	1
TGGT1_246940	transcript=TGGT1_246940-t26_1 | gene=TGGT1_246940 | organism=Toxoplasma_gondii_GT1 | gene_product=hypothetical protein | transcript_product=hypothetical protein | location=TGGT1_chrXII:2958189-2959370(+) | protein_length=393 | sequence_SO=chromosome | SO=protein_coding_gene | is_pseudo=false	0.013	FALSE	2.015	4	1	3	1	393	44.5	4.72	0	1	1.357	0.44	0.998957	190225	258222	69.58	4.82	325991	111002	267173	249571	60108.5	12605.5	101059	249571	High	Peak Found	High	High	1
TGGT1_305270	transcript=TGGT1_305270-t26_1 | gene=TGGT1_305270 | organism=Toxoplasma_gondii_GT1 | gene_product=hypothetical protein | transcript_product=hypothetical protein | location=TGGT1_chrIX:5105581-5110076(+) | protein_length=738 | sequence_SO=chromosome | SO=protein_coding_gene | is_pseudo=false	0	FALSE	14.369	10	6	8	6	738	82.3	8.87	7.03	6	1.357	0.44	0.998957	1.15851e+06	1.57181e+06	6.57	11.26	1.21366e+06	1.10587e+06	1.45125e+06	1.70239e+06	223784	125583	548938	1.70239e+06	Peak Found	Peak Found	High	High	1
TGGT1_314410	transcript=TGGT1_314410-t26_1 | gene=TGGT1_314410 | organism=Toxoplasma_gondii_GT1 | gene_product=AAA domain-containing protein [Source:UniProtKB/TrEMBL;Acc:S7W963] | transcript_product=putative aquarius | location=TGGT1_chrXI:4032614-4045800(+) | protein_length=2247 | sequence_SO=chromosome | SO=protein_coding_gene | is_pseudo=false	0	FALSE	8.305	2	4	4	4	2247	250.5	6.21	2	4	1.357	0.44	0.998957	320641	435157	NA	7.9	320641	NA	411496	460180	59122	NA	155649	460180	Peak Found	Not Found	Peak Found	High	1
TGGT1_214080	transcript=TGGT1_214080-t26_1 | gene=TGGT1_214080 | organism=Toxoplasma_gondii_GT1 | gene_product=Toxofilin [Source:UniProtKB/TrEMBL;Acc:A0A125YQJ5] | transcript_product=toxofilin | location=TGGT1_chrX:5904318-5905055(+) | protein_length=245 | sequence_SO=chromosome | SO=protein_coding_gene | is_pseudo=false	0	FALSE	10.798	20	5	6	5	245	27.1	9.57	3.54	5	1.354	0.44	0.998957	979993	1.32702e+06	1.89	6.71	966953	993210	1.3915e+06	1.26552e+06	178293	112790	526340	1.26552e+06	Peak Found	Peak Found	High	High	1
TGGT1_265090	transcript=TGGT1_265090-t26_1 | gene=TGGT1_265090 | organism=Toxoplasma_gondii_GT1 | gene_product=hypothetical protein | transcript_product=hypothetical protein | location=TGGT1_chrIX:1596970-1609746(-) | protein_length=2477 | sequence_SO=chromosome | SO=protein_coding_gene | is_pseudo=false	0.013	FALSE	2.116	0	1	1	1	2477	267.7	7.68	0	1	1.354	0.44	0.998957	173560	234920	5.26	4.48	167218	180144	242483	227592	30832.8	20457.3	91720	227592	Peak Found	Peak Found	Peak Found	High	1
TGGT1_300000	transcript=TGGT1_300000-t26_1 | gene=TGGT1_300000 | organism=Toxoplasma_gondii_GT1 | gene_product=Ribosomal_L18e/L15P domain-containing protein [Source:UniProtKB/TrEMBL;Acc:A0A125YRB0] | transcript_product=ribosomal protein RPL18 | location=TGGT1_chrXII:251803-254851(+) | protein_length=187 | sequence_SO=chromosome | SO=protein_coding_gene | is_pseudo=false	0	FALSE	10.674	30	5	10	5	187	21.2	11.52	11.45	5	1.354	0.44	0.998957	2.96084e+06	4.01019e+06	40.66	16.51	3.98024e+06	2.20253e+06	3.56646e+06	4.50914e+06	733904	250121	1.34902e+06	4.50914e+06	High	High	High	High	1	Methylthio [C119]
TGGT1_226970	transcript=TGGT1_226970-t26_1 | gene=TGGT1_226970 | organism=Toxoplasma_gondii_GT1 | gene_product=Ribosomal_S17_N domain-containing protein [Source:UniProtKB/TrEMBL;Acc:A0A125YQR5] | transcript_product=ribosomal protein RPS11 | location=TGGT1_chrX:1087439-1090315(-) | protein_length=161 | sequence_SO=chromosome | SO=protein_coding_gene | is_pseudo=false	0	FALSE	13.273	36	5	14	5	161	18.7	10.61	19.66	5	1.351	0.43	0.998957	4.95499e+06	6.69527e+06	17.95	36.48	5.6295e+06	4.3613e+06	8.71712e+06	5.14237e+06	1.03801e+06	495275	3.29727e+06	5.14237e+06	High	High	High	High	1	Methylthio [C60; C111; C116; C131]
TGGT1_211420	transcript=TGGT1_211420-t26_1 | gene=TGGT1_211420 | organism=Toxoplasma_gondii_GT1 | gene_product=RRM domain-containing protein [Source:UniProtKB/TrEMBL;Acc:S7VTD0] | transcript_product=RNA recognition motif-containing protein | location=TGGT1_chrIV:1661239-1664919(-) | protein_length=189 | sequence_SO=chromosome | SO=protein_coding_gene | is_pseudo=false	0	FALSE	11.315	30	4	8	4	189	22.8	7.03	11.31	4	1.348	0.43	0.998957	2.4352e+06	3.28237e+06	5.05	7.6	2.52382e+06	2.34969e+06	3.1104e+06	3.46384e+06	465359	266834	1.17652e+06	3.46384e+06	High	High	High	High	1
TGGT1_225150	transcript=TGGT1_225150-t26_1 | gene=TGGT1_225150 | organism=Toxoplasma_gondii_GT1 | gene_product=hypothetical protein | transcript_product=hypothetical protein | location=TGGT1_chrX:2357556-2361015(+) | protein_length=691 | sequence_SO=chromosome | SO=protein_coding_gene | is_pseudo=false	0	FALSE	8.545	7	3	5	3	691	76.8	9.47	3.21	3	1.348	0.43	0.998957	611621	824626	11.83	33.74	562437	665106	1.05175e+06	646551	103706	75530.2	397826	646551	High	Peak Found	High	High	1
TGGT1_221940	transcript=TGGT1_221940-t26_1 | gene=TGGT1_221940 | organism=Toxoplasma_gondii_GT1 | gene_product=Adaptin_N domain-containing protein [Source:UniProtKB/TrEMBL;Acc:S7VU32] | transcript_product=adaptin n terminal region domain-containing protein | location=TGGT1_chrII:689725-699521(-) | protein_length=1348 | sequence_SO=chromosome | SO=protein_coding_gene | is_pseudo=false	0.005	FALSE	2.633	1	1	1	1	1348	147.4	8.31	0	1	1.345	0.43	0.998957	69280.2	93168.8	41.36	2.19	51259.4	93636.2	94622.8	91737.1	9451.57	10633.4	35791.3	91737.1	Peak Found	Peak Found	Peak Found	High	1
TGGT1_234270	transcript=TGGT1_234270-t26_1 | gene=TGGT1_234270 | organism=Toxoplasma_gondii_GT1 | gene_product=hypothetical protein | transcript_product=hypothetical protein | location=TGGT1_chrX:4150640-4163518(+) | protein_length=2027 | sequence_SO=chromosome | SO=protein_coding_gene | is_pseudo=false	0.027	FALSE	1.807	0	1	1	1	2027	217.7	7.56	0	1	1.345	0.43	0.998957	69928.1	94048	NA	14.41	69928.1	NA	84906.2	104174	12893.8	NA	32116	104174	Peak Found	Not Found	Peak Found	High	1
TGGT1_212960A	transcript=TGGT1_212960A-t26_1 | gene=TGGT1_212960A | organism=Toxoplasma_gondii_GT1 | gene_product=hypothetical protein | transcript_product=hypothetical protein | location=TGGT1_chrV:597834-597974(+) | protein_length=47 | sequence_SO=chromosome | SO=protein_coding_gene | is_pseudo=false	0.003	FALSE	3.492	26	1	1	1	47	5	4.34	2.53	1	1.341	0.42	0.998957	124314	166657	71.42	5.37	216759	71296	173114	160441	39967.5	8096.46	65480.7	160441	Peak Found	Peak Found	Peak Found	High	1
TGGT1_319560	transcript=TGGT1_319560-t26_1 | gene=TGGT1_319560 | organism=Toxoplasma_gondii_GT1 | gene_product=EGF-like domain-containing protein [Source:UniProtKB/TrEMBL;Acc:S7VSV0] | transcript_product=microneme protein MIC3 | location=TGGT1_chrIV:856315-857588(+) | protein_length=383 | sequence_SO=chromosome | SO=protein_coding_gene | is_pseudo=false	0	FALSE	60.674	55	15	147	15	383	40.5	6.64	266.01	15	1.338	0.42	0.998957	1.64446e+08	2.20051e+08	1.46	12.09	1.66147e+08	1.62761e+08	2.39737e+08	2.01982e+08	3.06354e+07	1.84834e+07	9.06812e+07	2.01982e+08	High	High	High	High	1	Methylthio [C76; C85; C102; C145; C147; C160; C172; C185; C190; C237; C244; C249; C261; C263; C279; C302; C304; C339; C354]
TGGT1_217680	transcript=TGGT1_217680-t26_1 | gene=TGGT1_217680 | organism=Toxoplasma_gondii_GT1 | gene_product=hypothetical protein | transcript_product=hypothetical protein | location=TGGT1_chrXII:1930956-1942802(-) | protein_length=2213 | sequence_SO=chromosome | SO=protein_coding_gene | is_pseudo=false	0	FALSE	107.617	27	38	56	38	2213	242.9	5.39	36.06	38	1.336	0.42	0.998957	9.85278e+06	1.31646e+07	28.19	10.04	1.20586e+07	8.05048e+06	1.22612e+07	1.41346e+07	2.22344e+06	914222	4.63784e+06	1.41346e+07	High	Peak Found	High	High	1	Methylthio [C1396; C1689]
TGGT1_238010	transcript=TGGT1_238010-t26_1 | gene=TGGT1_238010 | organism=Toxoplasma_gondii_GT1 | gene_product=Ribosomal_L23eN domain-containing protein [Source:UniProtKB/TrEMBL;Acc:S7W653] | transcript_product=ribosomal protein RPL23A | location=TGGT1_chrVI:8631-10722(+) | protein_length=167 | sequence_SO=chromosome | SO=protein_coding_gene | is_pseudo=false	0	FALSE	13.7	26	4	7	4	167	18.6	10.4	6.42	4	1.332	0.41	0.998957	4.69743e+06	6.25476e+06	0.73	2.9	4.67322e+06	4.72176e+06	6.12771e+06	6.38445e+06	861681	536209	2.31782e+06	6.38445e+06	Peak Found	Peak Found	High	High	1
TGGT1_214575	transcript=TGGT1_214575-t26_1 | gene=TGGT1_214575 | organism=Toxoplasma_gondii_GT1 | gene_product=hypothetical protein | transcript_product=hypothetical protein | location=TGGT1_chrX:6262414-6262784(+) | protein_length=92 | sequence_SO=chromosome | SO=protein_coding_gene | is_pseudo=false	0	FALSE	9.4	33	2	5	2	92	10.3	8.92	8.23	2	1.331	0.41	0.998957	1.62783e+06	2.16694e+06	29.54	5.76	2.01224e+06	1.31685e+06	2.08036e+06	2.25713e+06	371031	149543	786902	2.25713e+06	High	Peak Found	High	High	1
TGGT1_290950	transcript=TGGT1_290950-t26_1 | gene=TGGT1_290950 | organism=Toxoplasma_gondii_GT1 | gene_product=Clathrin heavy chain [Source:UniProtKB/TrEMBL;Acc:A0A125YSB0] | transcript_product=putative clathrin heavy chain | location=TGGT1_chrIX:3770246-3782423(-) | protein_length=1731 | sequence_SO=chromosome | SO=protein_coding_gene | is_pseudo=false	0	FALSE	85.93	22	30	44	30	1731	194.4	6.06	39.35	30	1.329	0.41	0.998957	9.21327e+06	1.2245e+07	56.79	2.46	1.41001e+07	6.02013e+06	1.20337e+07	1.24599e+07	2.59987e+06	683653	4.5518e+06	1.24599e+07	High	Peak Found	High	High	1	Methylthio [C489; C1139]
TGGT1_267060	transcript=TGGT1_267060-t26_1 | gene=TGGT1_267060 | organism=Toxoplasma_gondii_GT1 | gene_product=Ribosomal_L14e domain-containing protein [Source:UniProtKB/TrEMBL;Acc:S7VPP6] | transcript_product=ribosomal protein RPL14 | location=TGGT1_chrIX:634719-636622(+) | protein_length=157 | sequence_SO=chromosome | SO=protein_coding_gene | is_pseudo=false	0	FALSE	10.008	24	4	7	4	157	17.9	10.77	8.67	4	1.328	0.41	0.998957	3.30579e+06	4.38907e+06	8.53	9.12	3.11202e+06	3.51162e+06	4.11447e+06	4.682e+06	573816	398784	1.55631e+06	4.682e+06	Peak Found	High	High	High	1	Methylthio [C14]
TGGT1_250710	transcript=TGGT1_250710-t26_1 | gene=TGGT1_250710 | organism=Toxoplasma_gondii_GT1 | gene_product=Microneme protein MIC10 [Source:UniProtKB/TrEMBL;Acc:A0A125YLT8] | transcript_product=microneme protein MIC10 | location=TGGT1_chrXII:5071359-5071955(+) | protein_length=198 | sequence_SO=chromosome | SO=protein_coding_gene | is_pseudo=false	0	FALSE	17.111	24	5	12	5	198	23.1	5.87	11.97	5	1.327	0.41	0.998957	7.93161e+06	1.05273e+07	1.81	5.75	7.83086e+06	8.03366e+06	1.01076e+07	1.09643e+07	1.44391e+06	912312	3.82323e+06	1.09643e+07	High	High	High	High	1
TGGT1_209430	transcript=TGGT1_209430-t26_1 | gene=TGGT1_209430 | organism=Toxoplasma_gondii_GT1 | gene_product=S4 RNA-binding domain-containing protein [Source:UniProtKB/TrEMBL;Acc:A0A125YJB9] | transcript_product=putative 40S ribosomal protein S4 | location=TGGT1_chrIb:1226666-1229484(+) | protein_length=183 | sequence_SO=chromosome | SO=protein_coding_gene | is_pseudo=false	0.014	FALSE	1.973	7	1	1	1	183	21.5	9.29	0	1	1.323	0.4	0.998957	93909.9	124257	NA	13.95	93909.9	NA	137179	112551	17315.8	NA	51888.4	112551	Peak Found	Not Found	Peak Found	High	1
TGGT1_203600	transcript=TGGT1_203600-t26_1 | gene=TGGT1_203600 | organism=Toxoplasma_gondii_GT1 | gene_product=hypothetical protein | transcript_product=hypothetical protein | location=TGGT1_chrVIIa:2307958-2309277(-) | protein_length=439 | sequence_SO=chromosome | SO=protein_coding_gene | is_pseudo=false	0	FALSE	6.328	13	3	4	3	439	47.3	8.25	0	3	1.32	0.4	0.998957	495930	654864	12.36	9.21	454321	541350	698982	613530	83770.9	61476.4	264392	613530	Peak Found	Peak Found	High	High	1	Methylthio [C407]
TGGT1_281640	transcript=TGGT1_281640-t26_1 | gene=TGGT1_281640 | organism=Toxoplasma_gondii_GT1 | gene_product=hypothetical protein | transcript_product=hypothetical protein | location=TGGT1_chrVIIa:4139783-4146429(+) | protein_length=948 | sequence_SO=chromosome | SO=protein_coding_gene | is_pseudo=false	0.013	FALSE	2.117	2	1	2	1	948	99.9	8.09	0	1	1.32	0.4	0.998957	106957	141221	4.49	0.78	103611	110410	142007	140440	19104.6	12538.3	53714.6	140440	Peak Found	Peak Found	High	High	1
TGGT1_202620	transcript=TGGT1_202620-t26_1 | gene=TGGT1_202620 | organism=Toxoplasma_gondii_GT1 | gene_product=hypothetical protein | transcript_product=hypothetical protein | location=TGGT1_chrVIIa:3063678-3064673(-) | protein_length=331 | sequence_SO=chromosome | SO=protein_coding_gene | is_pseudo=false	0.004	FALSE	2.732	3	1	1	1	331	36.1	9.47	0	1	1.319	0.4	0.998957	433466	571916	23.41	12.96	366778	512279	521718	626943	67629.1	58175	197341	626943	Peak Found	Peak Found	Peak Found	High	1
TGGT1_262730	transcript=TGGT1_262730-t26_1 | gene=TGGT1_262730 | organism=Toxoplasma_gondii_GT1 | gene_product=Protein kinase domain-containing protein [Source:UniProtKB/TrEMBL;Acc:S7UXU9] | transcript_product=rhoptry protein ROP16 | location=TGGT1_chrVIIb:1028456-1030579(-) | protein_length=707 | sequence_SO=chromosome | SO=protein_coding_gene | is_pseudo=false	0.012	FALSE	2.271	1	1	1	1	707	76.1	9.07	0	1	1.319	0.4	0.998957	285479	376516	48.09	0.72	406810	200336	374597	378446	75010.5	22750.3	141692	378446	Peak Found	Peak Found	Peak Found	High	1
TGGT1_205750	transcript=TGGT1_205750-t26_1 | gene=TGGT1_205750 | organism=Toxoplasma_gondii_GT1 | gene_product=HDAC_interact domain-containing protein [Source:UniProtKB/TrEMBL;Acc:S7UUL7] | transcript_product=histone deacetylase complex subunit Sin3 | location=TGGT1_chrVIIa:1085608-1090423(+) | protein_length=769 | sequence_SO=chromosome | SO=protein_coding_gene | is_pseudo=false	0.049	FALSE	1.406	1	1	1	1	769	86.9	8.44	0	1	1.318	0.4	0.998957	314397	414476	4.07	8.31	323584	305471	390805	439581	59664.7	34689.6	147823	439581	High	Peak Found	Peak Found	Peak Found	1
TGGT1_284050	transcript=TGGT1_284050-t26_1 | gene=TGGT1_284050 | organism=Toxoplasma_gondii_GT1 | gene_product=DEAD/DEAH box helicase domain-containing protein [Source:UniProtKB/TrEMBL;Acc:S7UNJ3] | transcript_product=DEAD/DEAH box helicase domain-containing protein | location=TGGT1_chrV:2643913-2665787(+) | protein_length=2545 | sequence_SO=chromosome | SO=protein_coding_gene | is_pseudo=false	0	FALSE	5.849	1	2	2	2	2545	280.7	8.32	1.92	2	1.318	0.4	0.998957	280274	369531	3.4	15.32	287092	273617	331439	412001	52936	31072.3	125368	412001	Peak Found	Peak Found	Peak Found	High	1
TGGT1_236580	transcript=TGGT1_236580-t26_1 | gene=TGGT1_236580 | organism=Toxoplasma_gondii_GT1 | gene_product=Ribonucloprotein [Source:UniProtKB/TrEMBL;Acc:S7VZI5] | transcript_product=Prp31-15.5k-U4 Snrna Complex family protein | location=TGGT1_chrX:5326799-5328659(-) | protein_length=182 | sequence_SO=chromosome | SO=protein_coding_gene | is_pseudo=false	0.005	FALSE	2.579	7	1	1	1	182	19.9	8.1	1.92	1	1.317	0.4	0.998957	839479	1.1055e+06	11.6	3.08	911406	773228	1.08168e+06	1.12985e+06	168051	87808.7	409147	1.12985e+06	Peak Found	Peak Found	High	Peak Found	1
TGGT1_278780	transcript=TGGT1_278780-t26_1 | gene=TGGT1_278780 | organism=Toxoplasma_gondii_GT1 | gene_product=Ubiquitin-like domain-containing protein [Source:UniProtKB/TrEMBL;Acc:S7W8B0] | transcript_product=hypothetical protein | location=TGGT1_chrXII:5793913-5797545(+) | protein_length=433 | sequence_SO=chromosome | SO=protein_coding_gene | is_pseudo=false	0	FALSE	11.011	17	5	7	5	433	45.8	6.32	4.17	5	1.317	0.4	0.998957	648169	853855	51.75	8.69	951305	441627	908028	802914	175408	50151.7	343464	802914	Peak Found	Peak Found	High	High	1
TGGT1_305980	transcript=TGGT1_305980-t26_1 | gene=TGGT1_305980 | organism=Toxoplasma_gondii_GT1 | gene_product=Pyruvate dehydrogenase complex subunit PDH-E3I [Source:UniProtKB/TrEMBL;Acc:S7UIE0] | transcript_product=pyruvate dehydrogenase complex subunit PDH-E3I | location=TGGT1_chrIX:5486775-5490424(+) | protein_length=638 | sequence_SO=chromosome | SO=protein_coding_gene | is_pseudo=false	0	FALSE	8.689	6	3	5	3	638	66.7	7.52	6.57	3	1.316	0.4	0.998957	498163	655831	57.56	8.97	767339	323412	615463	698848	141487	36727	232800	698848	High	Peak Found	High	High	1
TGGT1_233230	transcript=TGGT1_233230-t26_1 | gene=TGGT1_233230 | organism=Toxoplasma_gondii_GT1 | gene_product=RRM domain-containing protein [Source:UniProtKB/TrEMBL;Acc:S7V3Q8] | transcript_product=RNA-binding protein 8A family protein | location=TGGT1_chrVIII:2518761-2521941(+) | protein_length=162 | sequence_SO=chromosome | SO=protein_coding_gene | is_pseudo=false	0	FALSE	5.827	13	2	4	2	162	18.4	6.83	4.15	2	1.314	0.39	0.998957	588104	772975	8.81	7.26	625957	552540	813732	734259	115418	62747.1	307796	734259	Peak Found	Peak Found	High	High	1
TGGT1_311470	transcript=TGGT1_311470-t26_1 | gene=TGGT1_311470 | organism=Toxoplasma_gondii_GT1 | gene_product=Rhoptry neck protein RON5 [Source:UniProtKB/TrEMBL;Acc:S7W8Q7] | transcript_product=rhoptry neck protein RON5 | location=TGGT1_chrXI:2047692-2067010(-) | protein_length=1699 | sequence_SO=chromosome | SO=protein_coding_gene | is_pseudo=false	0	FALSE	134.682	39	44	85	44	1699	186.9	8.46	108.03	44	1.312	0.39	0.998957	2.67164e+07	3.50471e+07	22.37	6.51	3.13368e+07	2.27772e+07	3.34682e+07	3.67005e+07	5.7781e+06	2.5866e+06	1.26594e+07	3.67005e+07	High	High	High	High	1	Methylthio [C145; C222; C445; C566; C703; C1147; C1513]
TGGT1_294360	transcript=TGGT1_294360-t26_1 | gene=TGGT1_294360 | organism=Toxoplasma_gondii_GT1 | gene_product=Putative ubiquitin specific protease 39 isoform 2 [Source:UniProtKB/TrEMBL;Acc:A0A125YRG4] | transcript_product=putative ubiquitin specific protease 39 isoform 2 | location=TGGT1_chrIa:826234-834253(+) | protein_length=571 | sequence_SO=chromosome | SO=protein_coding_gene | is_pseudo=false	0.003	FALSE	3.008	3	1	1	1	571	64.1	6.23	0	1	1.311	0.39	0.998957	848469	1.11218e+06	26.05	2.15	1.02221e+06	704256	1.12921e+06	1.0954e+06	188483	79976.2	427125	1.0954e+06	Peak Found	Peak Found	Peak Found	High	1
TGGT1_300100	transcript=TGGT1_300100-t26_1 | gene=TGGT1_300100 | organism=Toxoplasma_gondii_GT1 | gene_product=Rhoptry neck protein RON2 [Source:UniProtKB/TrEMBL;Acc:S7UGV9] | transcript_product=rhoptry neck protein RON2 | location=TGGT1_chrXII:175560-186129(-) | protein_length=1479 | sequence_SO=chromosome | SO=protein_coding_gene | is_pseudo=false	0	FALSE	90.497	24	30	55	30	1479	166.3	9.58	62.16	30	1.31	0.39	0.998957	2.04163e+07	2.67506e+07	19.23	6.02	2.34101e+07	1.78053e+07	2.56347e+07	2.7915e+07	4.31652e+06	2.02199e+06	9.69641e+06	2.7915e+07	High	High	High	High	1	Methylthio [C190; C544; C716; C1145; C1149]
TGGT1_216560	transcript=TGGT1_216560-t26_1 | gene=TGGT1_216560 | organism=Toxoplasma_gondii_GT1 | gene_product=Ribosomal RNA-processing protein 8 [Source:UniProtKB/TrEMBL;Acc:S7ULR7] | transcript_product=methyltransferase domain-containing protein | location=TGGT1_chrXI:6001736-6005776(-) | protein_length=532 | sequence_SO=chromosome | SO=protein_coding_gene | is_pseudo=false	0.014	FALSE	1.971	2	1	1	1	532	58.5	10.04	0	1	1.309	0.39	0.998957	85554.8	112009	7.97	12.41	90520.5	80861.5	122307	102578	16690.8	9182.73	46262.8	102578	Peak Found	Peak Found	Peak Found	High	1
TGGT1_210690	transcript=TGGT1_210690-t26_1 | gene=TGGT1_210690 | organism=Toxoplasma_gondii_GT1 | gene_product=40S ribosomal protein S6 [Source:UniProtKB/TrEMBL;Acc:A0A125YZ10] | transcript_product=ribosomal protein RPS6 | location=TGGT1_chrIV:2087216-2087986(+) | protein_length=256 | sequence_SO=chromosome | SO=protein_coding_gene | is_pseudo=false	0	FALSE	18.415	31	6	7	6	256	28.9	10.8	3.77	6	1.307	0.39	0.998957	4.0541e+06	5.29928e+06	6.88	10.96	4.25639e+06	3.86142e+06	4.90347e+06	5.72705e+06	784822	438508	1.85475e+06	5.72705e+06	Peak Found	Peak Found	High	High	1
TGGT1_221380	transcript=TGGT1_221380-t26_1 | gene=TGGT1_221380 | organism=Toxoplasma_gondii_GT1 | gene_product=Alba domain-containing protein [Source:UniProtKB/TrEMBL;Acc:A0A125YMA6] | transcript_product=alba 1 | location=TGGT1_chrII:281451-282798(-) | protein_length=247 | sequence_SO=chromosome | SO=protein_coding_gene | is_pseudo=false	0	FALSE	13.204	21	5	11	5	247	27.2	9.74	3.84	5	1.307	0.39	0.998957	2.98039e+06	3.89563e+06	4.82	2.26	2.88043e+06	3.08383e+06	3.83397e+06	3.95827e+06	531113	350204	1.45021e+06	3.95827e+06	High	Peak Found	High	High	1
TGGT1_255260	transcript=TGGT1_255260-t26_1 | gene=TGGT1_255260 | organism=Toxoplasma_gondii_GT1 | gene_product=Apical membrane antigen AMA1 [Source:UniProtKB/TrEMBL;Acc:S7WI53] | transcript_product=apical membrane antigen AMA1 | location=TGGT1_chrVIIb:4856406-4860874(+) | protein_length=569 | sequence_SO=chromosome | SO=protein_coding_gene | is_pseudo=false	0	FALSE	23.803	21	8	15	8	569	63	6.16	13.91	8	1.307	0.39	0.998957	2.69925e+06	3.52866e+06	18.17	3.63	3.07155e+06	2.37207e+06	3.43932e+06	3.62032e+06	566354	269375	1.30093e+06	3.62032e+06	High	High	High	High	1	Methylthio [C117; C304; C447; C452]
TGGT1_232520	transcript=TGGT1_232520-t26_1 | gene=TGGT1_232520 | organism=Toxoplasma_gondii_GT1 | gene_product=Brix domain-containing protein [Source:UniProtKB/TrEMBL;Acc:A0A125YQE1] | transcript_product=brix domain-containing protein | location=TGGT1_chrVIII:2131005-2132727(-) | protein_length=401 | sequence_SO=chromosome | SO=protein_coding_gene | is_pseudo=false	0	FALSE	9.559	12	3	6	3	401	43.2	10.04	2.46	3	1.305	0.38	0.998957	576998	752951	36.02	0.66	748677	444686	756469	749449	138046	50499.1	286136	749449	Peak Found	High	High	High	1
TGGT1_315610	transcript=TGGT1_315610-t26_1 | gene=TGGT1_315610 | organism=Toxoplasma_gondii_GT1 | gene_product=hypothetical protein | transcript_product=hypothetical protein | location=TGGT1_chrXI:4798811-4799287(+) | protein_length=158 | sequence_SO=chromosome | SO=protein_coding_gene | is_pseudo=false	0.001	FALSE	3.597	7	1	5	1	158	16	11.78	6.11	1	1.305	0.38	0.998957	1.09463e+07	1.42875e+07	27.62	4.88	1.3341e+07	8.98142e+06	1.38023e+07	14789860	2.45991e+06	1019941	5.22075e+06	14789860	Peak Found	High	High	High	1
TGGT1_225125	transcript=TGGT1_225125-t26_1 | gene=TGGT1_225125 | organism=Toxoplasma_gondii_GT1 | gene_product=Pre-rRNA processing protein [Source:UniProtKB/TrEMBL;Acc:S7W597] | transcript_product=pre-rRNA processing protein | location=TGGT1_chrX:2378306-2392984(+) | protein_length=2871 | sequence_SO=chromosome | SO=protein_coding_gene | is_pseudo=false	0	FALSE	17.082	3	8	10	8	2871	310.5	8.07	0	8	1.304	0.38	0.998957	839667	1.09481e+06	28.96	7.86	1.03351e+06	682183	1.03557e+06	1.15745e+06	190565	77469.6	391707	1.15745e+06	Peak Found	High	High	High	1
TGGT1_231970	transcript=TGGT1_231970-t26_1 | gene=TGGT1_231970 | organism=Toxoplasma_gondii_GT1 | gene_product=MPN domain-containing protein [Source:UniProtKB/TrEMBL;Acc:S7WJ21] | transcript_product=pre-mRNA processing splicing factor PRP8 | location=TGGT1_chrVIII:1677402-1691932(+) | protein_length=2538 | sequence_SO=chromosome | SO=protein_coding_gene | is_pseudo=false	0	FALSE	60.836	12	24	34	24	2538	291.6	9	32.08	24	1.303	0.38	0.998957	1.00861e+07	1.31404e+07	16.32	7.69	1.13257e+07	8.98219e+06	1.24447e+07	1.3875e+07	2.08831e+06	1.02003e+06	4.70723e+06	1.3875e+07	High	Peak Found	High	High	1
TGGT1_272290	transcript=TGGT1_272290-t26_1 | gene=TGGT1_272290 | organism=Toxoplasma_gondii_GT1 | gene_product=Pyruvate dehydrogenase E1 component subunit beta [Source:UniProtKB/TrEMBL;Acc:S7V366] | transcript_product=pyruvate dehydrogenase complex subunit PD-HE1Beta | location=TGGT1_chrVIII:4082747-4086568(+) | protein_length=470 | sequence_SO=chromosome | SO=protein_coding_gene | is_pseudo=false	0.003	FALSE	3.195	6	2	2	2	470	50	6.6	0	2	1.303	0.38	0.998957	246609	321368	7.54	10.45	260122	233798	346062	298437	47963.1	26550.3	130899	298437	Peak Found	Peak Found	Peak Found	High	1
TGGT1_260270	transcript=TGGT1_260270-t26_1 | gene=TGGT1_260270 | organism=Toxoplasma_gondii_GT1 | gene_product=HEAT repeat-containing protein [Source:UniProtKB/TrEMBL;Acc:S7W775] | transcript_product=HEAT repeat-containing protein | location=TGGT1_chrVIIb:2371671-2387615(+) | protein_length=2376 | sequence_SO=chromosome | SO=protein_coding_gene | is_pseudo=false	0.013	FALSE	2.147	0	1	4	1	2376	255.1	5.95	0	1	1.302	0.38	0.998957	3.34747e+06	4.35915e+06	30.51	3.44	4.16774e+06	2.68864e+06	4.25446e+06	4.46641e+06	768476	305326	1.60926e+06	4.46641e+06	High	Peak Found	High	High	1	Methylthio [C2228]
TGGT1_288720	transcript=TGGT1_288720-t26_1 | gene=TGGT1_288720 | organism=Toxoplasma_gondii_GT1 | gene_product=Ribosomal_L16 domain-containing protein [Source:UniProtKB/TrEMBL;Acc:A0A125YSQ3] | transcript_product=ribosomal protein RPL10 | location=TGGT1_chrIX:2518172-2520490(-) | protein_length=221 | sequence_SO=chromosome | SO=protein_coding_gene | is_pseudo=false	0	FALSE	13.148	19	4	10	4	221	24.8	10.18	12.92	4	1.301	0.38	0.998957	1.31291e+07	1.70749e+07	3.64	9.58	1.27956e+07	1.34712e+07	1.59551e+07	1.82732e+07	2.35935e+06	1.52981e+06	6.03504e+06	1.82732e+07	High	Peak Found	High	High	1	Methylthio [C105]
TGGT1_243960	transcript=TGGT1_243960-t26_1 | gene=TGGT1_243960 | organism=Toxoplasma_gondii_GT1 | gene_product=NTF2 domain-containing protein [Source:UniProtKB/TrEMBL;Acc:A0A125YLE0] | transcript_product=nuclear transport factor 2 (ntf2) domain-containing protein | location=TGGT1_chrVI:2828443-2833407(-) | protein_length=797 | sequence_SO=chromosome | SO=protein_coding_gene | is_pseudo=false	0	FALSE	25.351	16	10	12	10	797	84.1	9.04	7.95	10	1.299	0.38	0.998957	2.15475e+06	2.79869e+06	46.37	8.57	3.02858e+06	1.53305e+06	2.63392e+06	2.97377e+06	558431	174095	996288	2.97377e+06	High	Peak Found	High	High	1
TGGT1_305160	transcript=TGGT1_305160-t26_1 | gene=TGGT1_305160 | organism=Toxoplasma_gondii_GT1 | gene_product=Histone H2B [Source:UniProtKB/TrEMBL;Acc:A0A125YHE1] | transcript_product=histone H2Ba | location=TGGT1_chrIX:5039074-5039424(+) | protein_length=116 | sequence_SO=chromosome | SO=protein_coding_gene | is_pseudo=false	0	FALSE	27.248	50	6	37	6	116	12.6	10.1	68.03	6	1.298	0.38	0.998957	2.19912e+08	2.85552e+08	18.53	7.54	2.50887e+08	1.92762e+08	2.70703e+08	3.01215e+08	4.62604e+07	2.18903e+07	1.02394e+08	3.01215e+08	High	High	High	High	1
TGGT1_269920	transcript=TGGT1_269920-t26_1 | gene=TGGT1_269920 | organism=Toxoplasma_gondii_GT1 | gene_product=Phosphatidylserine decarboxylase 2 proenzyme [Source:UniProtKB/Swiss-Prot;Acc:F6N7K6] | transcript_product=phosphatidylserine decarboxylase | location=TGGT1_chrVIII:5534744-5543165(-) | protein_length=968 | sequence_SO=chromosome | SO=protein_coding_gene | is_pseudo=false	0	FALSE	11.514	5	5	6	5	968	108	8.92	2.63	5	1.297	0.37	0.998957	781868	1.01395e+06	10.47	2.77	725994	842042	994255	1.03403e+06	133864	95623.3	376080	1.03403e+06	Peak Found	Peak Found	High	High	1	Methylthio [C946]
TGGT1_229010	transcript=TGGT1_229010-t26_1 | gene=TGGT1_229010 | organism=Toxoplasma_gondii_GT1 | gene_product=Rhoptry neck protein RON4 [Source:UniProtKB/TrEMBL;Acc:S7WIC1] | transcript_product=rhoptry neck protein RON4 | location=TGGT1_chrVIII:18238-24970(+) | protein_length=984 | sequence_SO=chromosome | SO=protein_coding_gene | is_pseudo=false	0	FALSE	84.193	41	23	47	23	984	107.3	6.46	56.56	23	1.295	0.37	0.998957	1.39555e+07	1.80783e+07	23.34	10.6	1.64844e+07	1.18145e+07	1.67699e+07	1.94887e+07	3.0395e+06	1.34167e+06	6.34326e+06	1.94887e+07	High	High	High	High	1	Methylthio [C777]
TGGT1_258660	transcript=TGGT1_258660-t26_1 | gene=TGGT1_258660 | organism=Toxoplasma_gondii_GT1 | gene_product=Rhoptry protein ROP6 [Source:UniProtKB/TrEMBL;Acc:A0A125YKF2] | transcript_product=rhoptry protein ROP6 | location=TGGT1_chrVIIb:3240488-3242940(-) | protein_length=480 | sequence_SO=chromosome | SO=protein_coding_gene | is_pseudo=false	0.004	FALSE	2.765	3	1	1	1	480	51.3	4.03	0	1	1.294	0.37	0.998957	109235	141342	35.03	23.7	140671	84823.5	119339	167402	25937.9	9632.66	45140.2	167402	Peak Found	Peak Found	Peak Found	High	1
TGGT1_306220	transcript=TGGT1_306220-t26_1 | gene=TGGT1_306220 | organism=Toxoplasma_gondii_GT1 | gene_product=hypothetical protein | transcript_product=hypothetical protein | location=TGGT1_chrIX:5617255-5624378(+) | protein_length=675 | sequence_SO=chromosome | SO=protein_coding_gene | is_pseudo=false	0.009	FALSE	2.397	2	1	1	1	675	77.2	9.64	0	1	1.294	0.37	0.998957	79023.5	102233	7.26	10.39	75066	83189.7	94981.5	110039	13841.2	9447.12	35927	110039	Peak Found	Peak Found	Peak Found	High	1
TGGT1_204050	transcript=TGGT1_204050-t26_1 | gene=TGGT1_204050 | organism=Toxoplasma_gondii_GT1 | gene_product=Peptidase_S8 domain-containing protein [Source:UniProtKB/TrEMBL;Acc:S7UVC6] | transcript_product=subtilisin SUB1 | location=TGGT1_chrVIIa:1932241-1938144(+) | protein_length=795 | sequence_SO=chromosome | SO=protein_coding_gene | is_pseudo=false	0	FALSE	17.559	17	8	12	8	795	85	5.39	6.53	8	1.29	0.37	0.998957	1.69255e+06	2.18391e+06	29.01	1.32	2.08401e+06	1.37462e+06	2.20445e+06	2.16357e+06	384264	156103	833839	2.16357e+06	High	Peak Found	High	High	1	Methylthio [C695]
TGGT1_318140	transcript=TGGT1_318140-t26_1 | gene=TGGT1_318140 | organism=Toxoplasma_gondii_GT1 | gene_product=SART-1 family protein [Source:UniProtKB/TrEMBL;Acc:S7UKH3] | transcript_product=SART-1 family protein | location=TGGT1_chrIV:1468174-1476334(+) | protein_length=861 | sequence_SO=chromosome | SO=protein_coding_gene | is_pseudo=false	0.013	FALSE	2.184	1	1	1	1	861	97.6	5.59	0	1	1.29	0.37	0.998957	69252.9	89316.6	NA	0.31	69252.9	NA	89123	89510.6	12769.3	NA	33711	89510.6	Peak Found	Not Found	Peak Found	High	1
TGGT1_226570	transcript=TGGT1_226570-t26_1 | gene=TGGT1_226570 | organism=Toxoplasma_gondii_GT1 | gene_product=hypothetical protein | transcript_product=hypothetical protein | location=TGGT1_chrX:1439365-1440887(-) | protein_length=139 | sequence_SO=chromosome | SO=protein_coding_gene | is_pseudo=false	0.003	FALSE	3.311	9	1	2	1	139	15	5.36	2.03	1	1.288	0.37	0.998957	265931	342505	NA	26.03	265931	NA	284317	412602	49034.3	NA	107544	412602	Peak Found	Not Found	High	High	1
TGGT1_305100	transcript=TGGT1_305100-t26_1 | gene=TGGT1_305100 | organism=Toxoplasma_gondii_GT1 | gene_product=hypothetical protein | transcript_product=hypothetical protein | location=TGGT1_chrIX:4996574-4999499(+) | protein_length=884 | sequence_SO=chromosome | SO=protein_coding_gene | is_pseudo=false	0.045	FALSE	1.427	1	1	1	1	884	96.9	8.27	0	1	1.286	0.36	0.998957	362361	466021	NA	NA	NA	362361	466021	NA	NA	41150.1	176274	NA	Not Found	Peak Found	High	Not Found	1
TGGT1_215160	transcript=TGGT1_215160-t26_1 | gene=TGGT1_215160 | organism=Toxoplasma_gondii_GT1 | gene_product=hypothetical protein | transcript_product=hypothetical protein | location=TGGT1_chrX:6680496-6681765(+) | protein_length=269 | sequence_SO=chromosome | SO=protein_coding_gene | is_pseudo=false	0.012	FALSE	2.296	4	1	2	1	269	31.2	9.09	1.99	1	1.285	0.36	0.998957	228474	293532	20.12	3.99	197986	263656	301931	285367	36506	29941.1	114206	285367	Peak Found	Peak Found	High	High	1
TGGT1_304740	transcript=TGGT1_304740-t26_1 | gene=TGGT1_304740 | organism=Toxoplasma_gondii_GT1 | gene_product=Protein kinase domain-containing protein [Source:UniProtKB/TrEMBL;Acc:S7UUU5] | transcript_product=rhoptry kinase family protein ROP35 | location=TGGT1_chrVIIa:653060-656106(-) | protein_length=640 | sequence_SO=chromosome | SO=protein_coding_gene | is_pseudo=false	0	FALSE	21.786	14	9	17	9	640	71.2	7.78	21.14	9	1.285	0.36	0.998957	4.81485e+06	6.18784e+06	11.27	3.89	5.2151e+06	4.44531e+06	6.01994e+06	6.36042e+06	961595	504815	2.27706e+06	6.36042e+06	High	Peak Found	High	High	1
TGGT1_227000	transcript=TGGT1_227000-t26_1 | gene=TGGT1_227000 | organism=Toxoplasma_gondii_GT1 | gene_product=hypothetical protein | transcript_product=hypothetical protein | location=TGGT1_chrX:1052036-1062406(+) | protein_length=1082 | sequence_SO=chromosome | SO=protein_coding_gene | is_pseudo=false	0.002	FALSE	3.976	2	2	3	2	1082	119.3	9.17	1.96	2	1.283	0.36	0.998957	229752	294763	41.14	7.54	309988	170284	310926	279441	57157.7	19337.6	117608	279441	Peak Found	Peak Found	High	High	1
TGGT1_216670	transcript=TGGT1_216670-t26_1 | gene=TGGT1_216670 | organism=Toxoplasma_gondii_GT1 | gene_product=FUSE-binding protein 2 / KH-type splicing regulatory protein [Source:UniProtKB/TrEMBL;Acc:S7VUJ0] | transcript_product=FUSE-binding protein 2 / KH-type splicing regulatory protein | location=TGGT1_chrXI:5891708-5895741(-) | protein_length=941 | sequence_SO=chromosome | SO=protein_coding_gene | is_pse…	0	FALSE	40.766	22	14	28	14	941	100	8.95	29.05	14	1.282	0.36	0.998957	5.99596e+06	7.68614e+06	18.48	2.36	6.83787e+06	5.25772e+06	7.55914e+06	7.81527e+06	1.26081e+06	597073	2.85926e+06	7.81527e+06	High	High	High	High	1	Methylthio [C209]
TGGT1_220390	transcript=TGGT1_220390-t26_1 | gene=TGGT1_220390 | organism=Toxoplasma_gondii_GT1 | gene_product=hypothetical protein | transcript_product=hypothetical protein | location=TGGT1_chrV:248814-251802(+) | protein_length=274 | sequence_SO=chromosome | SO=protein_coding_gene | is_pseudo=false	0	FALSE	4.57	9	2	2	2	274	29.2	8.72	0	2	1.281	0.36	0.998957	118655	151952	NA	4.16	118655	NA	147546	156489	21878.4	NA	55809.6	156489	Peak Found	Not Found	Peak Found	High	1
TGGT1_219200	transcript=TGGT1_219200-t26_1 | gene=TGGT1_219200 | organism=Toxoplasma_gondii_GT1 | gene_product=DEAD/DEAH box RNA helicase family protein [Source:UniProtKB/TrEMBL;Acc:S7V240] | transcript_product=DEAD/DEAH box RNA helicase family protein | location=TGGT1_chrXII:1014829-1023619(+) | protein_length=962 | sequence_SO=chromosome | SO=protein_coding_gene | is_pseudo=false	0	FALSE	7.625	5	4	4	4	962	107.3	6.34	1.77	4	1.28	0.36	0.998957	395693	506424	47.84	7.7	562730	278239	479553	534800	103760	31597.2	181392	534800	Peak Found	Peak Found	Peak Found	High	1
TGGT1_261580	transcript=TGGT1_261580-t26_1 | gene=TGGT1_261580 | organism=Toxoplasma_gondii_GT1 | gene_product=Histone H2A [Source:UniProtKB/TrEMBL;Acc:A0A125YFR2] | transcript_product=histone H2AX | location=TGGT1_chrVIIb:1624096-1624503(-) | protein_length=135 | sequence_SO=chromosome | SO=protein_coding_gene | is_pseudo=false	0	FALSE	13.606	34	3	20	2	135	14.5	10.56	43.29	3	1.276	0.35	0.998957	4.5249e+07	5.77204e+07	6.98	6.35	4.75413e+07	4.30672e+07	5.51835e+07	6.03738e+07	8.76599e+06	4.89076e+06	2.08733e+07	6.03738e+07	High	High	High	High	1
TGGT1_286770	transcript=TGGT1_286770-t26_1 | gene=TGGT1_286770 | organism=Toxoplasma_gondii_GT1 | gene_product=hypothetical protein | transcript_product=hypothetical protein | location=TGGT1_chrV:1537551-1538012(+) | protein_length=153 | sequence_SO=chromosome | SO=protein_coding_gene | is_pseudo=false	0	FALSE	5.823	15	2	6	2	153	17.2	5.8	9.86	2	1.276	0.35	0.998957	4.412e+06	5.62783e+06	9.5	9.85	4.71905e+06	4.12493e+06	6.03456e+06	5.24851e+06	870131	468432	2.28259e+06	5.24851e+06	High	Peak Found	High	High	1
TGGT1_249990	transcript=TGGT1_249990-t26_1 | gene=TGGT1_249990 | organism=Toxoplasma_gondii_GT1 | gene_product=hypothetical protein | transcript_product=hypothetical protein | location=TGGT1_chrXII:4909167-4913985(-) | protein_length=838 | sequence_SO=chromosome | SO=protein_coding_gene | is_pseudo=false	0	FALSE	56.442	31	19	36	19	838	92.7	8.25	37.79	19	1.274	0.35	0.998957	7.95711e+06	1.01372e+07	17.72	3.42	9.02508e+06	7.01552e+06	9.89488e+06	1.03854e+07	1.66411e+06	796691	3.74276e+06	1.03854e+07	High	High	High	High	1	Methylthio [C267; C737]
TGGT1_264660	transcript=TGGT1_264660-t26_1 | gene=TGGT1_264660 | organism=Toxoplasma_gondii_GT1 | gene_product=SAG-related sequence SRS44 [Source:UniProtKB/TrEMBL;Acc:S7VP87] | transcript_product=SAG-related sequence SRS44 | location=TGGT1_chrIX:1955976-1963333(+) | protein_length=2359 | sequence_SO=chromosome | SO=protein_coding_gene | is_pseudo=false	0	FALSE	104.851	22	39	61	39	2359	251.8	8.02	47.63	39	1.272	0.35	0.998957	1.79382e+07	2.28139e+07	10.75	5.5	1.93572e+07	1.66233e+07	2.19431e+07	2.37192e+07	3.56921e+06	1.88777e+06	8.30003e+06	2.37192e+07	High	High	High	High	1	Methylthio [C17; C254; C422; C764; C793; C1065; C1094; C1290; C1293; C1645; C1944; C2004]
TGGT1_216430	transcript=TGGT1_216430-t26_1 | gene=TGGT1_216430 | organism=Toxoplasma_gondii_GT1 | gene_product=Rab-GAP TBC domain-containing protein [Source:UniProtKB/TrEMBL;Acc:S7UM25] | transcript_product=TBC domain-containing protein | location=TGGT1_chrXI:6072785-6084660(-) | protein_length=3409 | sequence_SO=chromosome | SO=protein_coding_gene | is_pseudo=false	0.038	FALSE	1.489	0	1	1	1	3409	357.9	6.18	0	1	1.271	0.35	0.998957	1.86963e+06	2.37722e+06	12.13	0.75	1.7156e+06	2.03748e+06	2.38991e+06	2364593	316334	231379	903989	2364593	Peak Found	Peak Found	High	Peak Found	1
TGGT1_320050	transcript=TGGT1_320050-t26_1 | gene=TGGT1_320050 | organism=Toxoplasma_gondii_GT1 | gene_product=Ribosomal_L18_c domain-containing protein [Source:UniProtKB/TrEMBL;Acc:A0A125YYH7] | transcript_product=ribosomal protein RPL5 | location=TGGT1_chrIV:494655-497683(+) | protein_length=310 | sequence_SO=chromosome | SO=protein_coding_gene | is_pseudo=false	0	FALSE	21.837	25	7	15	7	310	35.3	9.88	9.07	7	1.271	0.35	0.998957	5.0991e+06	6.4811e+06	6.23	7.81	4.8792e+06	5.3289e+06	6.13239e+06	6.84965e+06	899661	605157	2.31959e+06	6.84965e+06	High	High	High	High	1	Methylthio [C62]
TGGT1_259240	transcript=TGGT1_259240-t26_1 | gene=TGGT1_259240 | organism=Toxoplasma_gondii_GT1 | gene_product=40S ribosomal protein S21 [Source:UniProtKB/TrEMBL;Acc:S7WEL7] | transcript_product=ribosomal protein RPS21 | location=TGGT1_chrVIIb:2808644-2809838(-) | protein_length=82 | sequence_SO=chromosome | SO=protein_coding_gene | is_pseudo=false	0	FALSE	7.473	41	3	5	3	82	9	8.05	5.58	3	1.268	0.34	0.998957	1.55211e+06	1.96823e+06	12.31	7.49	1.42237e+06	1.69369e+06	1.86655e+06	2.07545e+06	262267	192337	706025	2.07545e+06	Peak Found	Peak Found	High	High	1	Methylthio [C67]
TGGT1_214940	transcript=TGGT1_214940-t26_1 | gene=TGGT1_214940 | organism=Toxoplasma_gondii_GT1 | gene_product=MIC2-associated protein M2AP [Source:UniProtKB/TrEMBL;Acc:A0A125YM06] | transcript_product=MIC2-associated protein M2AP | location=TGGT1_chrX:6494811-6496996(+) | protein_length=330 | sequence_SO=chromosome | SO=protein_coding_gene | is_pseudo=false	0	FALSE	5.296	7	2	3	2	330	34.6	4.39	3.21	2	1.267	0.34	0.998957	1.01861e+06	1.29093e+06	1.41	3.15	1.00852e+06	1.0288e+06	1.31999e+06	1.26251e+06	185958	116832	499289	1.26251e+06	Peak Found	Peak Found	Peak Found	High	1
TGGT1_263050	transcript=TGGT1_263050-t26_1 | gene=TGGT1_263050 | organism=Toxoplasma_gondii_GT1 | gene_product=60S ribosomal protein L13 [Source:UniProtKB/TrEMBL;Acc:S7UXX9] | transcript_product=ribosomal protein RPL13 | location=TGGT1_chrVIIb:826699-830544(-) | protein_length=355 | sequence_SO=chromosome | SO=protein_coding_gene | is_pseudo=false	0	FALSE	14.353	19	6	14	6	355	39.7	11.18	12.19	6	1.267	0.34	0.998957	9.10223e+06	1.15351e+07	7.66	10.4	9.60937e+06	8.62185e+06	1.0716e+07	1.24168e+07	1.77184e+06	979108	4.05335e+06	1.24168e+07	High	High	High	High	1
TGGT1_311260	transcript=TGGT1_311260-t26_1 | gene=TGGT1_311260 | organism=Toxoplasma_gondii_GT1 | gene_product=EF-hand domain-containing protein [Source:UniProtKB/TrEMBL;Acc:A0A125YRC4] | transcript_product=putative myosin light chain MLC1 | location=TGGT1_chrXI:1892320-1893145(+) | protein_length=137 | sequence_SO=chromosome | SO=protein_coding_gene | is_pseudo=false	0.003	FALSE	3.459	12	1	1	1	137	14.3	4.7	1.63	1	1.265	0.34	0.998957	161501	204310	17.28	9.28	182600	142839	191320	218183	33669.1	16221	72367.1	218183	Peak Found	Peak Found	Peak Found	High	1
TGGT1_294980	transcript=TGGT1_294980-t26_1 | gene=TGGT1_294980 | organism=Toxoplasma_gondii_GT1 | gene_product=hypothetical protein | transcript_product=hypothetical protein | location=TGGT1_chrIa:1287876-1289315(+) | protein_length=270 | sequence_SO=chromosome | SO=protein_coding_gene | is_pseudo=false	0	FALSE	15.024	34	5	6	5	270	29.2	11.37	4.1	5	1.262	0.34	0.998957	985628	1.24396e+06	17.23	4.43	872026	1.11403e+06	1.20559e+06	1.28356e+06	160790	126510	456018	1.28356e+06	Peak Found	Peak Found	High	High	1
TGGT1_305010	transcript=TGGT1_305010-t26_1 | gene=TGGT1_305010 | organism=Toxoplasma_gondii_GT1 | gene_product=RRM domain-containing protein [Source:UniProtKB/TrEMBL;Acc:A0A125YXZ7] | transcript_product=putative pre-mRNA branch site protein p14 | location=TGGT1_chrIX:4941195-4942478(-) | protein_length=156 | sequence_SO=chromosome | SO=protein_coding_gene | is_pseudo=false	0	FALSE	9.193	22	3	3	3	156	17.2	9.94	5.44	3	1.261	0.33	0.998957	504424	635832	3.85	33.59	490857	518366	499100	810023	90507.5	58866.3	188786	810023	Peak Found	Peak Found	Peak Found	High	1
TGGT1_309752	transcript=TGGT1_309752-t26_1 | gene=TGGT1_309752 | organism=Toxoplasma_gondii_GT1 | gene_product=Succinate--CoA ligase [ADP-forming] subunit beta, mitochondrial [Source:UniProtKB/TrEMBL;Acc:A0A125YHZ3] | transcript_product=putative succinate-Coenzyme A ligase, beta subunit | location=TGGT1_chrXI:749202-752425(+) | protein_length=498 | sequence_SO=chromosome | SO=protein_coding_gene | is_pseudo=f…	0.032	FALSE	1.625	2	1	1	1	498	53.4	6.48	0	1	1.26	0.33	0.998957	85431.1	107677	17.39	17.65	75497.1	96672.2	94978.3	122073	13920.7	10978.2	35925.8	122073	Peak Found	Peak Found	Peak Found	High	1
TGGT1_229480	transcript=TGGT1_229480-t26_1 | gene=TGGT1_229480 | organism=Toxoplasma_gondii_GT1 | gene_product=Putative calcium binding protein [Source:UniProtKB/TrEMBL;Acc:S7V2K1] | transcript_product=putative calcium binding protein precursor | location=TGGT1_chrVIII:289042-291582(-) | protein_length=335 | sequence_SO=chromosome | SO=protein_coding_gene | is_pseudo=false	0	FALSE	30.347	42	10	17	10	335	38.3	4.69	21.28	10	1.258	0.33	0.998957	3.40706e+06	4.28585e+06	10.24	7.06	3.66348e+06	3.16859e+06	4.07689e+06	4.50553e+06	675497	359829	1.54209e+06	4.50553e+06	High	High	High	High	1
TGGT1_293190	transcript=TGGT1_293190-t26_1 | gene=TGGT1_293190 | organism=Toxoplasma_gondii_GT1 | gene_product=IPPc domain-containing protein [Source:UniProtKB/TrEMBL;Acc:A0A125YFF1] | transcript_product=endonuclease/exonuclease/phosphatase family protein | location=TGGT1_chrIa:133494-141236(+) | protein_length=682 | sequence_SO=chromosome | SO=protein_coding_gene | is_pseudo=false	0.004	FALSE	2.767	2	1	1	1	682	76.2	5.47	0	1	1.255	0.33	0.998957	183375	230150	11.09	10.82	198361	169522	213173	248479	36575.2	19251.1	80633.1	248479	Peak Found	Peak Found	Peak Found	High	1
TGGT1_209200	transcript=TGGT1_209200-t26_1 | gene=TGGT1_209200 | organism=Toxoplasma_gondii_GT1 | gene_product=hypothetical protein | transcript_product=hypothetical protein | location=TGGT1_chrIb:1128185-1136295(+) | protein_length=753 | sequence_SO=chromosome | SO=protein_coding_gene | is_pseudo=false	0.003	FALSE	3.44	2	1	2	1	753	82.1	7.05	2.55	1	1.254	0.33	0.998957	30748	38549.3	19.8	8.21	35400.5	26707	40857.5	36371.6	6527.38	3032.88	15454.4	36371.6	Peak Found	Peak Found	High	High	1
TGGT1_289680	transcript=TGGT1_289680-t26_1 | gene=TGGT1_289680 | organism=Toxoplasma_gondii_GT1 | gene_product=Ras-related protein Rab11 [Source:UniProtKB/TrEMBL;Acc:A0A125YY15] | transcript_product=Ras-related protein Rab11 | location=TGGT1_chrIX:3181746-3185073(-) | protein_length=219 | sequence_SO=chromosome | SO=protein_coding_gene | is_pseudo=false	0	FALSE	4.828	9	2	3	2	219	25	7.03	6.28	2	1.254	0.33	0.998957	893597	1.12057e+06	21.88	8.3	764539	1.04444e+06	1.05662e+06	1.18838e+06	140971	118608	399670	1.18838e+06	High	Peak Found	High	High	1
TGGT1_318440	transcript=TGGT1_318440-t26_1 | gene=TGGT1_318440 | organism=Toxoplasma_gondii_GT1 | gene_product=Helicase associated domain (Ha2) protein [Source:UniProtKB/TrEMBL;Acc:S7UJM8] | transcript_product=helicase associated domain (ha2) protein | location=TGGT1_chrIV:1264045-1277404(-) | protein_length=2234 | sequence_SO=chromosome | SO=protein_coding_gene | is_pseudo=false	0	FALSE	98.171	23	36	53	36	2234	236.8	8.97	50.53	36	1.254	0.33	0.998957	9.34846e+06	1.17204e+07	12.68	9.57	1.02276e+07	8.54486e+06	1.09526e+07	1.2542e+07	1.88584e+06	970365	4.14285e+06	1.2542e+07	High	High	High	High	1	Methylthio [C1291; C2055]
TGGT1_305850	transcript=TGGT1_305850-t26_1 | gene=TGGT1_305850 | organism=Toxoplasma_gondii_GT1 | gene_product=RNA recognition motif-containing protein [Source:UniProtKB/TrEMBL;Acc:A0A125YMV7] | transcript_product=RNA recognition motif-containing protein | location=TGGT1_chrIX:5399604-5403723(-) | protein_length=372 | sequence_SO=chromosome | SO=protein_coding_gene | is_pseudo=false	0	FALSE	14.896	13	6	11	6	372	39.1	9.63	5.58	6	1.248	0.32	0.998957	2.58684e+06	3.22879e+06	4.11	1.83	2.6632e+06	2.51267e+06	3.27075e+06	3.18736e+06	491058	285342	1.23717e+06	3.18736e+06	High	High	High	High	1
TGGT1_278870	transcript=TGGT1_278870-t26_1 | gene=TGGT1_278870 | organism=Toxoplasma_gondii_GT1 | gene_product=Myosin F [Source:UniProtKB/TrEMBL;Acc:S7UZI5] | transcript_product=myosin F | location=TGGT1_chrXII:5709485-5725053(+) | protein_length=1953 | sequence_SO=chromosome | SO=protein_coding_gene | is_pseudo=false	0	FALSE	154.763	33	52	102	52	1953	216.3	8.1	115.33	52	1.247	0.32	0.998957	4.04048e+07	5.0373e+07	8.55	2.86	4.29249e+07	3.80326e+07	4.93634e+07	5.14033e+07	7.91478e+06	4.31903e+06	1.86718e+07	5.14033e+07	High	High	High	High	1	Methylthio [C221; C300; C554; C767; C1156; C1386; C1601; C1746]
TGGT1_215470	transcript=TGGT1_215470-t26_1 | gene=TGGT1_215470 | organism=Toxoplasma_gondii_GT1 | gene_product=Ribosomal protein [Source:UniProtKB/TrEMBL;Acc:A0A125YJN6] | transcript_product=ribosomal protein RPL10A | location=TGGT1_chrX:6865357-6867300(+) | protein_length=217 | sequence_SO=chromosome | SO=protein_coding_gene | is_pseudo=false	0	FALSE	17.907	33	6	13	6	217	24.6	9.88	21.16	6	1.243	0.31	0.998957	8.77092e+06	1.09025e+07	3.51	5.84	8.99123e+06	8.55601e+06	1.04613e+07	1.13622e+07	1.65787e+06	971631	3.95702e+06	1.13622e+07	High	High	High	High	1	Methylthio [C65; C73]
TGGT1_218410	transcript=TGGT1_218410-t26_1 | gene=TGGT1_218410 | organism=Toxoplasma_gondii_GT1 | gene_product=60S acidic ribosomal protein P0 [Source:UniProtKB/TrEMBL;Acc:A0A125YFP0] | transcript_product=ribosomal protein RPP0 | location=TGGT1_chrXII:1471598-1473146(+) | protein_length=314 | sequence_SO=chromosome | SO=protein_coding_gene | is_pseudo=false	0	FALSE	24.234	31	8	16	8	314	34.1	5.6	21.06	8	1.243	0.31	0.998957	7.16057e+06	8.89877e+06	16.21	4.21	8.03411e+06	6.38201e+06	8.63765e+06	9.16778e+06	1.48138e+06	724748	3.26721e+06	9.16778e+06	High	High	High	High	1
TGGT1_221970	transcript=TGGT1_221970-t26_1 | gene=TGGT1_221970 | organism=Toxoplasma_gondii_GT1 | gene_product=hypothetical protein | transcript_product=hypothetical protein | location=TGGT1_chrII:713954-715277(-) | protein_length=228 | sequence_SO=chromosome | SO=protein_coding_gene | is_pseudo=false	0.031	FALSE	1.716	4	1	1	1	228	25.3	9.7	0	1	1.243	0.31	0.998957	124521	154786	33.25	6.23	158233	97991.5	148108	161764	29176.1	11128	56022.3	161764	Peak Found	Peak Found	High	Peak Found	1
TGGT1_231080	transcript=TGGT1_231080-t26_1 | gene=TGGT1_231080 | organism=Toxoplasma_gondii_GT1 | gene_product=Ribosomal protein RPL38 [Source:UniProtKB/TrEMBL;Acc:A0A125YR20] | transcript_product=ribosomal protein RPL38 | location=TGGT1_chrVIII:1225571-1225825(+) | protein_length=84 | sequence_SO=chromosome | SO=protein_coding_gene | is_pseudo=false	0.004	FALSE	2.677	12	1	2	1	84	9.6	10.68	1.79	1	1.243	0.31	0.998957	348321	432994	NA	NA	NA	348321	432994	NA	NA	39555.8	163781	NA	Not Found	Peak Found	High	High	1
TGGT1_282070	transcript=TGGT1_282070-t26_1 | gene=TGGT1_282070 | organism=Toxoplasma_gondii_GT1 | gene_product=hypothetical protein | transcript_product=hypothetical protein | location=TGGT1_chrVIIa:4270196-4276302(+) | protein_length=1172 | sequence_SO=chromosome | SO=protein_coding_gene | is_pseudo=false	0	FALSE	7.272	3	3	4	3	1172	124.7	9.89	2.32	3	1.243	0.31	0.998957	229990	285810	NA	1.87	229990	NA	282064	289605	42407.2	NA	106692	289605	Peak Found	Not Found	High	High	1
TGGT1_289750	transcript=TGGT1_289750-t26_1 | gene=TGGT1_289750 | organism=Toxoplasma_gondii_GT1 | gene_product=Ubiquitin-like domain-containing protein [Source:UniProtKB/TrEMBL;Acc:A0A125YNY4] | transcript_product=ribosomal-ubiquitin protein RPL40 | location=TGGT1_chrIX:3235966-3237173(+) | protein_length=129 | sequence_SO=chromosome | SO=protein_coding_gene | is_pseudo=false	0	FALSE	13.089	33	4	40	4	129	14.7	9.8	53.52	4	1.241	0.31	0.998957	4.4608e+07	5.53743e+07	20.76	0.2	3.84766e+07	5.17165e+07	5.52968e+07	55451938	7.09458e+06	5.87299e+06	2.09161e+07	55451938	High	High	High	High	1
TGGT1_265190	transcript=TGGT1_265190-t26_1 | gene=TGGT1_265190 | organism=Toxoplasma_gondii_GT1 | gene_product=ULP_PROTEASE domain-containing protein [Source:UniProtKB/TrEMBL;Acc:S7UGW1] | transcript_product=Ulp1 protease family, C-terminal catalytic domain-containing protein | location=TGGT1_chrIX:1529797-1543022(+) | protein_length=3028 | sequence_SO=chromosome | SO=protein_coding_gene | is_pseudo=false	0.004	FALSE	2.7	0	1	6	1	3028	329.7	5.14	8.09	1	1.24	0.31	0.998957	3.37857e+07	4.19035e+07	3.44	8.53	3.46177e+07	3.29737e+07	3.94492e+07	44510536	6.38305e+06	3744537	14921751	44510536	High	High	High	High	1
TGGT1_213900	transcript=TGGT1_213900-t26_1 | gene=TGGT1_213900 | organism=Toxoplasma_gondii_GT1 | gene_product=RanBP2-type domain-containing protein [Source:UniProtKB/TrEMBL;Acc:S7UNK6] | transcript_product=regulator of chromosome condensation RCC1 | location=TGGT1_chrV:1284029-1290918(-) | protein_length=1155 | sequence_SO=chromosome | SO=protein_coding_gene | is_pseudo=false	0	FALSE	6.543	3	3	4	3	1155	122.5	6.65	0	3	1.239	0.31	0.998957	387101	479626	0.55	8.64	388613	385594	451170	509876	71655.2	43788.6	170656	509876	Peak Found	Peak Found	High	High	1
TGGT1_212300	transcript=TGGT1_212300-t26_1 | gene=TGGT1_212300 | organism=Toxoplasma_gondii_GT1 | gene_product=hypothetical protein | transcript_product=hypothetical protein | location=TGGT1_chrX:3837742-3842895(+) | protein_length=683 | sequence_SO=chromosome | SO=protein_coding_gene | is_pseudo=false	0	FALSE	24.877	19	10	13	10	683	75.6	6.51	9.88	10	1.234	0.3	0.998957	1.92077e+06	2.3693e+06	12.92	1.83	1.75258e+06	2.10509e+06	2.40011e+06	2.33888e+06	323153	239057	907848	2.33888e+06	Peak Found	Peak Found	High	High	1
TGGT1_260825	transcript=TGGT1_260825-t26_1 | gene=TGGT1_260825 | organism=Toxoplasma_gondii_GT1 | gene_product=hypothetical protein | transcript_product=hypothetical protein | location=TGGT1_chrVIIb:1996744-1997638(-) | protein_length=92 | sequence_SO=chromosome | SO=protein_coding_gene | is_pseudo=false	0.027	FALSE	1.814	12	1	1	1	92	10.2	9.25	0	1	1.234	0.3	0.998957	357177	440694	19.41	10.05	311105	410072	473221	410404	57363.6	46568.3	178997	410404	Peak Found	Peak Found	Peak Found	High	1
TGGT1_230960	transcript=TGGT1_230960-t26_1 | gene=TGGT1_230960 | organism=Toxoplasma_gondii_GT1 | gene_product=CPSF_A domain-containing protein [Source:UniProtKB/TrEMBL;Acc:A0A125YIG2] | transcript_product=putative splicing factor 3b, subunit 3 | location=TGGT1_chrVIII:1132596-1143754(-) | protein_length=1233 | sequence_SO=chromosome | SO=protein_coding_gene | is_pseudo=false	0	FALSE	9.551	5	4	4	4	1233	135.7	6.6	2.2	4	1.233	0.3	0.998957	458077	564937	36.78	9.85	597786	351020	605754	526871	110224	39862.2	229128	526871	Peak Found	Peak Found	High	High	1
TGGT1_305520	transcript=TGGT1_305520-t26_1 | gene=TGGT1_305520 | organism=Toxoplasma_gondii_GT1 | gene_product=S5 DRBM domain-containing protein [Source:UniProtKB/TrEMBL;Acc:A0A125YUG2] | transcript_product=ribosomal protein RPS2 | location=TGGT1_chrIX:5229307-5231745(+) | protein_length=269 | sequence_SO=chromosome | SO=protein_coding_gene | is_pseudo=false	0	FALSE	28.121	40	8	19	8	269	29.3	10.2	26.62	8	1.232	0.3	0.998957	1.33181e+07	1.64141e+07	9.7	13.72	1.42654e+07	1.24337e+07	1.48915e+07	1.80924e+07	2.63035e+06	1.41198e+06	5.63275e+06	1.80924e+07	High	High	High	High	1	Methylthio [C80]
TGGT1_231960	transcript=TGGT1_231960-t26_1 | gene=TGGT1_231960 | organism=Toxoplasma_gondii_GT1 | gene_product=Putative omega secalin [Source:UniProtKB/TrEMBL;Acc:S7WBR2] | transcript_product=putative omega secalin | location=TGGT1_chrVIII:1668838-1672885(-) | protein_length=1111 | sequence_SO=chromosome | SO=protein_coding_gene | is_pseudo=false	0	FALSE	13.025	9	5	6	5	1111	119.6	8.98	1.77	5	1.231	0.3	0.998957	886891	1.09178e+06	31.14	8.52	708983	1.10944e+06	1.02784e+06	1.15969e+06	130727	125990	388783	1.15969e+06	Peak Found	Peak Found	High	High	1
TGGT1_237820	transcript=TGGT1_237820-t26_1 | gene=TGGT1_237820 | organism=Toxoplasma_gondii_GT1 | gene_product=ISP3_C domain-containing protein [Source:UniProtKB/TrEMBL;Acc:A0A125YYM9] | transcript_product=IMC sub-compartment protein ISP2 | location=TGGT1_chrIV:2412658-2414234(+) | protein_length=160 | sequence_SO=chromosome | SO=protein_coding_gene | is_pseudo=false	0	FALSE	7.215	18	3	3	3	160	17.4	5.91	1.66	3	1.228	0.3	0.998957	736837	904584	6.33	15.7	770599	704554	1.01123e+06	809183	142088	80010	382502	809183	Peak Found	Peak Found	High	High	1	Methylthio [C107]
TGGT1_205220	transcript=TGGT1_205220-t26_1 | gene=TGGT1_205220 | organism=Toxoplasma_gondii_GT1 | gene_product=PRP1_N domain-containing protein [Source:UniProtKB/TrEMBL;Acc:S7UTZ4] | transcript_product=putative U5 snRNP-associated subunit | location=TGGT1_chrVIIa:1443394-1451209(+) | protein_length=1113 | sequence_SO=chromosome | SO=protein_coding_gene | is_pseudo=false	0	FALSE	4.342	2	2	3	2	1113	122.7	8.88	1.86	2	1.227	0.3	0.998957	359031	440626	23.59	11.26	424887	303383	406825	477236	78343.6	34452.6	153882	477236	Peak Found	Peak Found	High	High	1
TGGT1_210095	transcript=TGGT1_210095-t26_1 | gene=TGGT1_210095 | organism=Toxoplasma_gondii_GT1 | gene_product=hypothetical protein | transcript_product=hypothetical protein | location=TGGT1_chrIb:1629844-1631103(-) | protein_length=365 | sequence_SO=chromosome | SO=protein_coding_gene | is_pseudo=false	0	FALSE	4.8	6	2	3	1	365	38.6	8.75	0	2	1.227	0.3	0.998957	132004	161969	1.73	4.36	130396	133631	157052	167040	24043.3	15175.3	59405.3	167040	Peak Found	Peak Found	Peak Found	High	1
TGGT1_308890	transcript=TGGT1_308890-t26_1 | gene=TGGT1_308890 | organism=Toxoplasma_gondii_GT1 | gene_product=Transcription elongation factor SPT6 [Source:UniProtKB/TrEMBL;Acc:S7W102] | transcript_product=transcription elongation factor SPT6 | location=TGGT1_chrXI:296965-314183(+) | protein_length=3132 | sequence_SO=chromosome | SO=protein_coding_gene | is_pseudo=false	0	FALSE	6.179	1	3	3	3	3132	349.6	5.74	0	3	1.226	0.29	0.998957	299833	367656	37.77	1.34	228035	394238	364194	371151	42046.6	44770.1	137757	371151	Peak Found	Peak Found	Peak Found	High	1
TGGT1_227600	transcript=TGGT1_227600-t26_1 | gene=TGGT1_227600 | organism=Toxoplasma_gondii_GT1 | gene_product=Ribosomal protein RPL34 [Source:UniProtKB/TrEMBL;Acc:A0A125YXF2] | transcript_product=ribosomal protein RPL34 | location=TGGT1_chrX:803568-805820(-) | protein_length=134 | sequence_SO=chromosome | SO=protein_coding_gene | is_pseudo=false	0.003	FALSE	3.507	15	2	2	2	134	15.4	11.18	1.8	2	1.225	0.29	0.998957	1.48422e+06	1.81852e+06	6.73	13.51	1.41517e+06	1.55665e+06	1.65233e+06	2.00142e+06	260939	176775	624997	2.00142e+06	Peak Found	Peak Found	Peak Found	High	1
TGGT1_226440	transcript=TGGT1_226440-t26_1 | gene=TGGT1_226440 | organism=Toxoplasma_gondii_GT1 | gene_product=SWI2/SNF2-containing protein RAD16 [Source:UniProtKB/TrEMBL;Acc:S7UXH9] | transcript_product=SWI2/SNF2-containing protein RAD16 | location=TGGT1_chrX:1539596-1550307(+) | protein_length=1700 | sequence_SO=chromosome | SO=protein_coding_gene | is_pseudo=false	0.003	FALSE	3.048	1	1	1	1	1700	187.7	7.17	0	1	1.224	0.29	0.998957	80909.6	99062.9	1.4	5.77	81715	80112.1	95097.5	103194	15067.2	9097.63	35970.9	103194	Peak Found	Peak Found	Peak Found	High	1
TGGT1_289530	transcript=TGGT1_289530-t26_1 | gene=TGGT1_289530 | organism=Toxoplasma_gondii_GT1 | gene_product=Ribosomal_L19e domain-containing protein [Source:UniProtKB/TrEMBL;Acc:A0A125YMW0] | transcript_product=ribosomal protein RPL19 | location=TGGT1_chrIX:3095967-3098521(-) | protein_length=187 | sequence_SO=chromosome | SO=protein_coding_gene | is_pseudo=false	0	FALSE	5.085	10	2	6	2	187	22.1	11.15	5.97	2	1.222	0.29	0.998957	3.21707e+06	3.93119e+06	4.19	13.09	3.31391e+06	3.12305e+06	3.58278e+06	4.31349e+06	611041	354658	1.3552e+06	4.31349e+06	High	High	High	High	1
TGGT1_216880	transcript=TGGT1_216880-t26_1 | gene=TGGT1_216880 | organism=Toxoplasma_gondii_GT1 | gene_product=WD_REPEATS_REGION domain-containing protein [Source:UniProtKB/TrEMBL;Acc:A0A125YYR8] | transcript_product=guanine nucleotide-binding protein | location=TGGT1_chrXI:5736268-5739860(-) | protein_length=321 | sequence_SO=chromosome | SO=protein_coding_gene | is_pseudo=false	0	FALSE	25.486	36	9	20	9	321	35.1	6.34	13.38	9	1.219	0.29	0.998957	6.32611e+06	7.70946e+06	0.26	2.18	6.33767e+06	6.31457e+06	7.59134e+06	7.82942e+06	1.16858e+06	717090	2.87144e+06	7.82942e+06	High	High	High	High	1	Methylthio [C19; C143; C187]
TGGT1_223050	transcript=TGGT1_223050-t26_1 | gene=TGGT1_223050 | organism=Toxoplasma_gondii_GT1 | gene_product=Ribosomal_S10 domain-containing protein [Source:UniProtKB/TrEMBL;Acc:S7UL41] | transcript_product=ribosomal protein RPS20 | location=TGGT1_chrII:1366681-1368519(+) | protein_length=233 | sequence_SO=chromosome | SO=protein_coding_gene | is_pseudo=false	0	FALSE	8.69	17	4	8	4	233	25.8	9.52	3.75	4	1.218	0.28	0.998957	5.48434e+06	6.6776e+06	7.19	2.38	5.77075e+06	5.21215e+06	6.56602e+06	6.79107e+06	1.06405e+06	591898	2.48362e+06	6.79107e+06	Peak Found	High	High	High	1	Methylthio [C150; C184]
TGGT1_321660	transcript=TGGT1_321660-t26_1 | gene=TGGT1_321660 | organism=Toxoplasma_gondii_GT1 | gene_product=Mannosyltransferase [Source:UniProtKB/TrEMBL;Acc:A0A125YNX7] | transcript_product=putative mannosyltransferase | location=TGGT1_chrIb:1651333-1654176(+) | protein_length=768 | sequence_SO=chromosome | SO=protein_coding_gene | is_pseudo=false	0.032	FALSE	1.681	1	1	1	1	768	86.1	8.59	1.6	1	1.218	0.28	0.998957	265727	323527	19.08	22.07	304353	232003	276433	378644	56118.8	26346.6	104562	378644	Peak Found	Peak Found	Peak Found	High	1
TGGT1_239100	transcript=TGGT1_239100-t26_1 | gene=TGGT1_239100 | organism=Toxoplasma_gondii_GT1 | gene_product=40S ribosomal protein S7 [Source:UniProtKB/TrEMBL;Acc:A0A125YZ18] | transcript_product=ribosomal protein RPS7 | location=TGGT1_chrVI:457170-458270(+) | protein_length=196 | sequence_SO=chromosome | SO=protein_coding_gene | is_pseudo=false	0	FALSE	12.479	26	4	9	4	196	22.6	9.86	5.54	4	1.216	0.28	0.998957	4.97831e+06	6.05471e+06	19.55	13.65	5.72161e+06	4.33157e+06	5.49603e+06	6.67019e+06	1.05499e+06	491899	2.07889e+06	6.67019e+06	High	High	High	High	1
TGGT1_236540	transcript=TGGT1_236540-t26_1 | gene=TGGT1_236540 | organism=Toxoplasma_gondii_GT1 | gene_product=RNA recognition motif-containing protein [Source:UniProtKB/TrEMBL;Acc:S7URE6] | transcript_product=RNA recognition motif-containing protein | location=TGGT1_chrX:5301444-5305442(+) | protein_length=508 | sequence_SO=chromosome | SO=protein_coding_gene | is_pseudo=false	0	FALSE	16.966	11	5	11	5	508	53	6.42	14.89	5	1.215	0.28	0.998957	3.26715e+06	3.96912e+06	12.44	8.98	3.5684e+06	2.99133e+06	3.72451e+06	4.22981e+06	657967	339699	1.4088e+06	4.22981e+06	High	High	High	High	1
TGGT1_223855	transcript=TGGT1_223855-t26_1 | gene=TGGT1_223855 | organism=Toxoplasma_gondii_GT1 | gene_product=RRM domain-containing protein [Source:UniProtKB/TrEMBL;Acc:S7WBY7] | transcript_product=RNA recognition motif-containing protein | location=TGGT1_chrX:3429742-3436856(-) | protein_length=565 | sequence_SO=chromosome | SO=protein_coding_gene | is_pseudo=false	0.009	FALSE	2.431	2	1	1	1	565	62.7	9.29	0	1	1.21	0.28	0.998957	90310.5	109302	16.64	5.93	101639	80244.6	113983	104814	18740.9	9112.67	43114.4	104814	Peak Found	Peak Found	Peak Found	High	1
TGGT1_231140	transcript=TGGT1_231140-t26_1 | gene=TGGT1_231140 | organism=Toxoplasma_gondii_GT1 | gene_product=40S ribosomal protein S25 [Source:UniProtKB/TrEMBL;Acc:S7V273] | transcript_product=ribosomal protein RPS25 | location=TGGT1_chrVIII:1259763-1260788(+) | protein_length=161 | sequence_SO=chromosome | SO=protein_coding_gene | is_pseudo=false	0	FALSE	8.693	13	2	9	2	161	18.7	10.33	13.42	2	1.209	0.27	0.998957	4.18733e+06	5.06064e+06	8.96	6.18	3.92985e+06	4.46168e+06	4.84412e+06	5.28683e+06	724612	506673	1.8323e+06	5.28683e+06	High	High	High	High	1
TGGT1_205510	transcript=TGGT1_205510-t26_1 | gene=TGGT1_205510 | organism=Toxoplasma_gondii_GT1 | gene_product=Nop domain-containing protein [Source:UniProtKB/TrEMBL;Acc:S7UUJ5] | transcript_product=putative nucleolar protein 5 | location=TGGT1_chrVIIa:1272709-1276843(-) | protein_length=490 | sequence_SO=chromosome | SO=protein_coding_gene | is_pseudo=false	0	FALSE	18.479	18	7	9	7	490	54.3	9.04	9.48	7	1.208	0.27	0.998957	4.56431e+06	5.51374e+06	22.41	4	5.35523e+06	3.89019e+06	5.67191e+06	5.35999e+06	987435	441775	2.14541e+06	5.35999e+06	Peak Found	Peak Found	High	High	1
TGGT1_206670	transcript=TGGT1_206670-t26_1 | gene=TGGT1_206670 | organism=Toxoplasma_gondii_GT1 | gene_product=hypothetical protein | transcript_product=hypothetical protein | location=TGGT1_chrVIIa:705099-714174(-) | protein_length=2072 | sequence_SO=chromosome | SO=protein_coding_gene | is_pseudo=false	0	FALSE	8.474	2	4	5	4	2072	218.3	5.41	1.74	4	1.208	0.27	0.998957	612033	739162	28.05	7.46	748315	500571	701134	779252	137979	56845.5	265206	779252	Peak Found	Peak Found	Peak Found	High	1
TGGT1_209030	transcript=TGGT1_209030-t26_1 | gene=TGGT1_209030 | organism=Toxoplasma_gondii_GT1 | gene_product=Actin ACT1 [Source:UniProtKB/TrEMBL;Acc:A0A125YH17] | transcript_product=actin ACT1 | location=TGGT1_chrIb:1014618-1016180(+) | protein_length=376 | sequence_SO=chromosome | SO=protein_coding_gene | is_pseudo=false	0	FALSE	62.412	48	15	84	15	376	41.9	5.16	144.71	15	1.208	0.27	0.998957	2.00652e+08	2.42399e+08	5.39	0.59	2.08457e+08	1.93139e+08	2.41381e+08	2.43421e+08	3.84367e+07	2.19331e+07	9.1303e+07	2.43421e+08	High	High	High	High	1	Methylthio [C53; C258; C286]
TGGT1_247700	transcript=TGGT1_247700-t26_1 | gene=TGGT1_247700 | organism=Toxoplasma_gondii_GT1 | gene_product=AP2/ERF domain-containing protein [Source:UniProtKB/TrEMBL;Acc:S7V1L6] | transcript_product=AP2 domain transcription factor AP2XII-4 | location=TGGT1_chrXII:3439195-3451035(-) | protein_length=3831 | sequence_SO=chromosome | SO=protein_coding_gene | is_pseudo=false	0.012	FALSE	2.294	0	1	3	1	3831	400.8	7.53	0	1	1.208	0.27	0.998957	4.19932e+06	5.07113e+06	2.85	3.61	4.28496e+06	4.11539e+06	4.9434e+06	5.20216e+06	790090	467348	1.86985e+06	5.20216e+06	High	High	High	Peak Found	1
TGGT1_265830	transcript=TGGT1_265830-t26_1 | gene=TGGT1_265830 | organism=Toxoplasma_gondii_GT1 | gene_product=Phosphodiesterase/alkaline phosphatase D family protein [Source:UniProtKB/TrEMBL;Acc:S7UHY4] | transcript_product=phosphodiesterase/alkaline phosphatase D family protein | location=TGGT1_chrIX:1250718-1256372(-) | protein_length=762 | sequence_SO=chromosome | SO=protein_coding_gene | is_pseudo=false	0.049	FALSE	1.397	1	1	2	1	762	83.9	8.41	0	1	1.208	0.27	0.998957	4.94875e+06	5.97748e+06	15.91	14.36	5.54048e+06	4.42021e+06	5.39843e+06	6618632	1.02159e+06	501964	2.04197e+06	6618632	Peak Found	Peak Found	High	High	1
TGGT1_238050	transcript=TGGT1_238050-t26_1 | gene=TGGT1_238050 | organism=Toxoplasma_gondii_GT1 | gene_product=Nuclease and tudor domain-containing protein [Source:UniProtKB/TrEMBL;Acc:S7URW3] | transcript_product=nuclease and tudor domain-containing protein | location=TGGT1_chrVI:31087-39926(+) | protein_length=1024 | sequence_SO=chromosome | SO=protein_coding_gene | is_pseudo=false	0.004	FALSE	2.765	1	1	1	1	1024	114.2	8.31	1.71	1	1.207	0.27	0.998957	118779	143392	NA	7.84	118779	NA	135655	151569	21901.3	NA	51312	151569	Peak Found	Not Found	Peak Found	High	1
TGGT1_269650	transcript=TGGT1_269650-t26_1 | gene=TGGT1_269650 | organism=Toxoplasma_gondii_GT1 | gene_product=FFD and TFG box motifs protein [Source:UniProtKB/TrEMBL;Acc:A0A125YUH5] | transcript_product=FFD and TFG box motifs protein | location=TGGT1_chrVIII:5714889-5717952(+) | protein_length=492 | sequence_SO=chromosome | SO=protein_coding_gene | is_pseudo=false	0	FALSE	9.493	8	3	3	3	492	51.4	7.14	6.1	3	1.205	0.27	0.998957	582817	702463	3.98	5.38	566628	599468	729700	676243	104479	68076.3	276011	676243	Peak Found	Peak Found	Peak Found	High	1	Methylthio [C399]
TGGT1_254620	transcript=TGGT1_254620-t26_1 | gene=TGGT1_254620 | organism=Toxoplasma_gondii_GT1 | gene_product=Ribosomal protein RPL39 [Source:UniProtKB/TrEMBL;Acc:S7UM53] | transcript_product=ribosomal protein RPL39 | location=TGGT1_chrIII:1840786-1841847(-) | protein_length=68 | sequence_SO=chromosome | SO=protein_coding_gene | is_pseudo=false	0.006	FALSE	2.506	15	1	2	1	68	8.3	12.02	0	1	1.204	0.27	0.998957	272726	328366	4.22	21.74	280991	264704	281237	383393	51811	30060.1	106379	383393	Peak Found	Peak Found	Peak Found	High	1
TGGT1_297420	transcript=TGGT1_297420-t26_1 | gene=TGGT1_297420 | organism=Toxoplasma_gondii_GT1 | gene_product=Putative beta-tubulin cofactor D [Source:UniProtKB/TrEMBL;Acc:S7UKY2] | transcript_product=putative beta-tubulin cofactor D | location=TGGT1_chrII:1734618-1745552(-) | protein_length=2041 | sequence_SO=chromosome | SO=protein_coding_gene | is_pseudo=false	0.019	FALSE	1.914	1	1	2	1	2041	221.1	6.07	0	1	1.202	0.27	0.998957	1.01926e+06	1.22514e+06	4.69	19.83	986029	1.05362e+06	1.06384e+06	1.41089e+06	181811	119650	402399	1.41089e+06	Peak Found	Peak Found	High	High	1
TGGT1_295850	transcript=TGGT1_295850-t26_1 | gene=TGGT1_295850 | organism=Toxoplasma_gondii_GT1 | gene_product=Cyclic nucleotide-binding domain-containing protein [Source:UniProtKB/TrEMBL;Acc:S7VRS7] | transcript_product=cyclic nucleotide-binding domain-containing protein | location=TGGT1_chrIa:1477996-1491633(-) | protein_length=3062 | sequence_SO=chromosome | SO=protein_coding_gene | is_pseudo=false	0	FALSE	4.371	1	2	2	2	3062	331.3	6.48	0	2	1.2	0.26	0.998957	168087	201760	7.41	2.14	177139	159497	198724	204843	32662.2	18112.7	75167.8	204843	Peak Found	Peak Found	Peak Found	High	1
TGGT1_209290	transcript=TGGT1_209290-t26_1 | gene=TGGT1_209290 | organism=Toxoplasma_gondii_GT1 | gene_product=Ribosomal protein RPS28 [Source:UniProtKB/TrEMBL;Acc:S7UIH9] | transcript_product=ribosomal protein RPS28 | location=TGGT1_chrIb:1207027-1207383(-) | protein_length=118 | sequence_SO=chromosome | SO=protein_coding_gene | is_pseudo=false	0	FALSE	8.893	21	2	8	2	118	13.2	10.76	15.09	2	1.199	0.26	0.998957	1.82531e+06	2.18884e+06	16.16	13.63	2.04729e+06	1.6274e+06	1.98714e+06	2.41101e+06	377494	184810	751642	2.41101e+06	High	High	High	High	1
TGGT1_260820	transcript=TGGT1_260820-t26_1 | gene=TGGT1_260820 | organism=Toxoplasma_gondii_GT1 | gene_product=ISP1_C domain-containing protein [Source:UniProtKB/TrEMBL;Acc:A0A125YZB3] | transcript_product=IMC sub-compartment protein ISP1 | location=TGGT1_chrVIIb:2000787-2002966(-) | protein_length=176 | sequence_SO=chromosome | SO=protein_coding_gene | is_pseudo=false	0	FALSE	12.006	35	4	5	4	176	19.4	7.69	1.84	4	1.199	0.26	0.998957	1.10002e+06	1.31866e+06	26.47	5.09	1.32941e+06	910204	1.36705e+06	1.27199e+06	245126	103364	517089	1.27199e+06	High	Peak Found	High	High	1	Methylthio [C142; C153; C166]
TGGT1_204020	transcript=TGGT1_204020-t26_1 | gene=TGGT1_204020 | organism=Toxoplasma_gondii_GT1 | gene_product=Ribosomal_L2_C domain-containing protein [Source:UniProtKB/TrEMBL;Acc:A0A125YV56] | transcript_product=ribosomal protein RPL8 | location=TGGT1_chrVIIa:1947745-1950214(+) | protein_length=260 | sequence_SO=chromosome | SO=protein_coding_gene | is_pseudo=false	0	FALSE	17.927	32	7	12	7	260	28.2	10.87	8.94	7	1.194	0.26	0.998957	5.67426e+06	6.77517e+06	0.42	8.99	5.65747e+06	5.6911e+06	6.35719e+06	7.22063e+06	1.04316e+06	646288	2.40462e+06	7.22063e+06	Peak Found	Peak Found	High	High	1
TGGT1_271178	transcript=TGGT1_271178-t26_1 | gene=TGGT1_271178 | organism=Toxoplasma_gondii_GT1 | gene_product=hypothetical protein | transcript_product=hypothetical protein | location=TGGT1_chrVIII:4650157-4650555(+) | protein_length=132 | sequence_SO=chromosome | SO=protein_coding_gene | is_pseudo=false	0.014	FALSE	1.983	9	1	1	1	132	16	8.9	0	1	1.193	0.25	0.998957	134028	159868	37.05	18.07	175262	102496	181790	140590	32316.1	11639.5	68762.4	140590	Peak Found	Peak Found	Peak Found	High	1
TGGT1_214830	transcript=TGGT1_214830-t26_1 | gene=TGGT1_214830 | organism=Toxoplasma_gondii_GT1 | gene_product=Exportin-T [Source:UniProtKB/TrEMBL;Acc:S7VZE0] | transcript_product=hypothetical protein | location=TGGT1_chrX:6407759-6417959(+) | protein_length=1511 | sequence_SO=chromosome | SO=protein_coding_gene | is_pseudo=false	0.03	FALSE	1.783	1	1	1	1	1511	163.9	6.28	0	1	1.19	0.25	0.998957	163368	194434	24.09	28.22	194038	137546	158835	238010	35778.1	15619.9	60079.9	238010	Peak Found	Peak Found	Peak Found	High	1	Methylthio [C91]
TGGT1_207720	transcript=TGGT1_207720-t26_1 | gene=TGGT1_207720 | organism=Toxoplasma_gondii_GT1 | gene_product=hypothetical protein | transcript_product=hypothetical protein | location=TGGT1_chrIb:247992-259807(+) | protein_length=1628 | sequence_SO=chromosome | SO=protein_coding_gene | is_pseudo=false	0.037	FALSE	1.497	0	1	1	1	1628	177	7.56	0	1	1.188	0.25	0.998957	173364	205932	NA	6.11	173364	NA	197225	215024	31966.1	NA	74600.7	215024	Peak Found	Not Found	Peak Found	High	1
TGGT1_239330	transcript=TGGT1_239330-t26_1 | gene=TGGT1_239330 | organism=Toxoplasma_gondii_GT1 | gene_product=Ribosomal protein L37 [Source:UniProtKB/TrEMBL;Acc:A0A125YUV0] | transcript_product=ribosomal protein RPL37 | location=TGGT1_chrVI:546044-548295(+) | protein_length=98 | sequence_SO=chromosome | SO=protein_coding_gene | is_pseudo=false	0.035	FALSE	1.542	7	1	2	1	98	11.2	11.27	0	1	1.187	0.25	0.998957	601178	713534	25.89	3.46	723442	499576	731226	696270	133393	56732.5	276588	696270	Peak Found	Peak Found	High	High	1
TGGT1_248480	transcript=TGGT1_248480-t26_1 | gene=TGGT1_248480 | organism=Toxoplasma_gondii_GT1 | gene_product=S4 RNA-binding domain-containing protein [Source:UniProtKB/TrEMBL;Acc:A0A125YWF5] | transcript_product=ribosomal protein RPS9 | location=TGGT1_chrXII:3816916-3818776(+) | protein_length=188 | sequence_SO=chromosome | SO=protein_coding_gene | is_pseudo=false	0	FALSE	11.597	25	5	8	5	188	21.7	10.51	7.9	5	1.186	0.25	0.998957	6.53546e+06	7.74995e+06	4.54	6.25	6.74856e+06	6.32909e+06	7.4148e+06	8.10024e+06	1.24435e+06	718739	2.80467e+06	8.10024e+06	High	High	High	High	1
TGGT1_239300	transcript=TGGT1_239300-t26_1 | gene=TGGT1_239300 | organism=Toxoplasma_gondii_GT1 | gene_product=hypothetical protein | transcript_product=hypothetical protein | location=TGGT1_chrVI:525971-532748(+) | protein_length=1232 | sequence_SO=chromosome | SO=protein_coding_gene | is_pseudo=false	0	FALSE	4.688	2	2	2	2	1232	139	6.21	0	2	1.185	0.25	0.998957	183026	216951	NA	1.09	183026	NA	218631	215284	33747.6	NA	82697.6	215284	Peak Found	Not Found	Peak Found	High	1
TGGT1_248340	transcript=TGGT1_248340-t26_1 | gene=TGGT1_248340 | organism=Toxoplasma_gondii_GT1 | gene_product=GTP-binding nuclear protein [Source:UniProtKB/TrEMBL;Acc:S7V0L0] | transcript_product=GTP-binding nuclear protein ran/tc4 | location=TGGT1_chrXII:3749189-3752256(+) | protein_length=229 | sequence_SO=chromosome | SO=protein_coding_gene | is_pseudo=false	0	FALSE	14.464	28	5	8	5	229	26	8.65	5.4	5	1.185	0.25	0.998957	1.80701e+06	2.14166e+06	1.89	5.69	1.78298e+06	1.83138e+06	2.05711e+06	2.22967e+06	328757	207973	778108	2.22967e+06	Peak Found	High	High	High	1
TGGT1_309590	transcript=TGGT1_309590-t26_1 | gene=TGGT1_309590 | organism=Toxoplasma_gondii_GT1 | gene_product=Rhoptry protein ROP1 [Source:UniProtKB/TrEMBL;Acc:S7W7R3] | transcript_product=rhoptry protein ROP1 | location=TGGT1_chrXI:707942-709312(+) | protein_length=456 | sequence_SO=chromosome | SO=protein_coding_gene | is_pseudo=false	0	FALSE	30.459	25	7	48	7	456	49.5	5.22	72.92	7	1.185	0.25	0.998957	9.57788e+07	1.13542e+08	10.17	0.35	8.91233e+07	1.02931e+08	1.13821e+08	1.13263e+08	1.64332e+07	1.1689e+07	4.3053e+07	1.13263e+08	High	High	High	High	1
TGGT1_310700	transcript=TGGT1_310700-t26_1 | gene=TGGT1_310700 | organism=Toxoplasma_gondii_GT1 | gene_product=Serine/threonine-protein phosphatase [Source:UniProtKB/TrEMBL;Acc:A0A125YY12] | transcript_product=serine/threonine phosophatase PP1 | location=TGGT1_chrXI:1487440-1488915(-) | protein_length=306 | sequence_SO=chromosome | SO=protein_coding_gene | is_pseudo=false	0	FALSE	21.661	30	7	13	7	306	35	5.72	9.81	7	1.184	0.24	0.998957	2.72348e+06	3.22404e+06	16.84	3.72	3.06953e+06	2.41643e+06	3.14029e+06	3.31003e+06	565981	274413	1.18782e+06	3.31003e+06	High	High	High	High	1	Methylthio [C126; C139; C201]
TGGT1_232440	transcript=TGGT1_232440-t26_1 | gene=TGGT1_232440 | organism=Toxoplasma_gondii_GT1 | gene_product=Brf1p family coiled coil protein [Source:UniProtKB/TrEMBL;Acc:A0A125YMJ3] | transcript_product=Brf1p family coiled coil protein | location=TGGT1_chrVIII:2091405-2096025(+) | protein_length=468 | sequence_SO=chromosome | SO=protein_coding_gene | is_pseudo=false	0	FALSE	25.792	21	10	12	10	468	54	6.62	15.07	10	1.176	0.23	0.998957	6.45382e+06	7.58915e+06	12.25	1.72	7.03933e+06	5.91701e+06	7.49758e+06	7.68184e+06	1.29796e+06	671943	2.83598e+06	7.68184e+06	Peak Found	Peak Found	High	High	1
TGGT1_311430	transcript=TGGT1_311430-t26_1 | gene=TGGT1_311430 | organism=Toxoplasma_gondii_GT1 | gene_product=Fibrillarin [Source:UniProtKB/TrEMBL;Acc:S7UTZ7] | transcript_product=fibrillarin | location=TGGT1_chrXI:2031325-2032910(-) | protein_length=303 | sequence_SO=chromosome | SO=protein_coding_gene | is_pseudo=false	0	FALSE	23.788	33	9	18	9	303	31.9	10.29	22.86	9	1.176	0.23	0.998957	6.71252e+06	7.89512e+06	10.77	13.67	7.24485e+06	6.21931e+06	7.16564e+06	8.69886e+06	1.33586e+06	706272	2.71042e+06	8.69886e+06	High	High	High	High	1	Methylthio [C251]
TGGT1_245460	transcript=TGGT1_245460-t26_1 | gene=TGGT1_245460 | organism=Toxoplasma_gondii_GT1 | gene_product=40S ribosomal protein S8 [Source:UniProtKB/TrEMBL;Acc:S7WHE0] | transcript_product=ribosomal protein RPS8 | location=TGGT1_chrXII:2220293-2224095(-) | protein_length=205 | sequence_SO=chromosome | SO=protein_coding_gene | is_pseudo=false	0	FALSE	14.744	27	4	8	4	205	23.4	10.64	10.27	4	1.175	0.23	0.998957	3.18122e+06	3.73667e+06	8.98	8.24	3.39016e+06	2.98517e+06	3.52483e+06	3.96123e+06	625100	339000	1.33328e+06	3.96123e+06	High	High	High	High	1
TGGT1_229750	transcript=TGGT1_229750-t26_1 | gene=TGGT1_229750 | organism=Toxoplasma_gondii_GT1 | gene_product=hypothetical protein | transcript_product=hypothetical protein | location=TGGT1_chrVIII:414321-424829(-) | protein_length=1358 | sequence_SO=chromosome | SO=protein_coding_gene | is_pseudo=false	0.01	FALSE	2.384	1	1	1	1	1358	145.4	5.5	1.78	1	1.174	0.23	0.998957	65806.4	77266.9	21.75	0.87	76843.4	56354.7	77744.8	76792	14168.9	6399.71	29407.2	76792	Peak Found	Peak Found	Peak Found	High	1
TGGT1_301180	transcript=TGGT1_301180-t26_1 | gene=TGGT1_301180 | organism=Toxoplasma_gondii_GT1 | gene_product=SAG-related sequence SRS19F [Source:UniProtKB/TrEMBL;Acc:S7VPV0] | transcript_product=SAG-related sequence SRS19F | location=TGGT1_chrIV:2185215-2186390(-) | protein_length=391 | sequence_SO=chromosome | SO=protein_coding_gene | is_pseudo=false	0.003	FALSE	2.885	3	1	1	1	391	40.9	6.55	2.11	1	1.174	0.23	0.998957	194437	228302	21.63	5.99	226841	166663	238186	218829	41826.4	18926.5	90094.5	218829	Peak Found	Peak Found	Peak Found	High	1
TGGT1_301390	transcript=TGGT1_301390-t26_1 | gene=TGGT1_301390 | organism=Toxoplasma_gondii_GT1 | gene_product=Ribosome biogenesis protein BOP1 homolog [Source:UniProtKB/TrEMBL;Acc:S7UGJ2] | transcript_product=putative ribosome biogenesis protein BOP1 | location=TGGT1_chrIV:2318679-2327410(+) | protein_length=1052 | sequence_SO=chromosome | SO=protein_coding_gene | is_pseudo=false	0.004	FALSE	2.716	1	1	1	1	1052	117.3	4.98	0	1	1.173	0.23	0.998957	171806	201498	12.43	12	187638	157309	185070	219383	34598	17864.2	70003.4	219383	Peak Found	Peak Found	Peak Found	High	1
TGGT1_270830	transcript=TGGT1_270830-t26_1 | gene=TGGT1_270830 | organism=Toxoplasma_gondii_GT1 | gene_product=Small nuclear ribonucleoprotein Sm D2 [Source:UniProtKB/TrEMBL;Acc:S7V4D5] | transcript_product=small nuclear ribonucleoprotein | location=TGGT1_chrVIII:4965286-4968969(-) | protein_length=155 | sequence_SO=chromosome | SO=protein_coding_gene | is_pseudo=false	0	FALSE	7.39	21	3	4	3	155	17.5	10.76	6.42	3	1.17	0.23	0.998957	1.31674e+06	1.54068e+06	30.91	0.72	1.64426e+06	1.05446e+06	1.53287e+06	1.54852e+06	303181	119746	579813	1.54852e+06	Peak Found	Peak Found	High	High	1
TGGT1_208030	transcript=TGGT1_208030-t26_1 | gene=TGGT1_208030 | organism=Toxoplasma_gondii_GT1 | gene_product=Microneme protein MIC4 [Source:UniProtKB/TrEMBL;Acc:A0A125YP10] | transcript_product=microneme protein MIC4 | location=TGGT1_chrIb:547335-549077(+) | protein_length=580 | sequence_SO=chromosome | SO=protein_coding_gene | is_pseudo=false	0	FALSE	74.172	46	19	87	19	580	63	5.22	151.74	19	1.167	0.22	0.998957	1.05518e+08	1.23087e+08	14.32	0.55	9.53207e+07	1.16806e+08	1.23567e+08	1.22608e+08	1.75759e+07	1.32646e+07	4.67396e+07	1.22608e+08	High	High	High	High	1	Methylthio [C68; C93; C97; C103; C214; C267; C380; C419; C454; C466; C488; C492; C539; C565]
TGGT1_313640	transcript=TGGT1_313640-t26_1 | gene=TGGT1_313640 | organism=Toxoplasma_gondii_GT1 | gene_product=hypothetical protein | transcript_product=hypothetical protein | location=TGGT1_chrXI:3542451-3543056(+) | protein_length=201 | sequence_SO=chromosome | SO=protein_coding_gene | is_pseudo=false	0.003	FALSE	2.798	6	1	1	1	201	22.3	6.39	0	1	1.165	0.22	0.998957	112109	130575	37.76	16.37	85273.4	147389	146678	116239	15723.3	16737.7	55481.5	116239	Peak Found	Peak Found	Peak Found	High	1	Methylthio [C191]
TGGT1_258970	transcript=TGGT1_258970-t26_1 | gene=TGGT1_258970 | organism=Toxoplasma_gondii_GT1 | gene_product=hypothetical protein | transcript_product=hypothetical protein | location=TGGT1_chrVIIb:3019435-3037803(-) | protein_length=3039 | sequence_SO=chromosome | SO=protein_coding_gene | is_pseudo=false	0	FALSE	19.088	4	9	9	9	3039	326.8	6.84	0	9	1.164	0.22	0.998957	1.16673e+06	1.35809e+06	12.87	3.23	1.27822e+06	1.06495e+06	1.32743e+06	1.38945e+06	235687	120938	502104	1.38945e+06	Peak Found	Peak Found	Peak Found	High	1
TGGT1_262690	transcript=TGGT1_262690-t26_1 | gene=TGGT1_262690 | organism=Toxoplasma_gondii_GT1 | gene_product=Ribosomal protein RPL27 [Source:UniProtKB/TrEMBL;Acc:S7UYE2] | transcript_product=ribosomal protein RPL27 | location=TGGT1_chrVIIb:1055303-1056255(+) | protein_length=142 | sequence_SO=chromosome | SO=protein_coding_gene | is_pseudo=false	0	FALSE	15.084	40	6	12	6	142	16.3	10.37	17.4	6	1.163	0.22	0.998957	5.72982e+06	6.66188e+06	4.33	10.89	5.90809e+06	5.55693e+06	6.16727e+06	7.19616e+06	1.08937e+06	631051	2.33279e+06	7.19616e+06	High	High	High	High	1
TGGT1_301440	transcript=TGGT1_301440-t26_1 | gene=TGGT1_301440 | organism=Toxoplasma_gondii_GT1 | gene_product=Calcium-dependent protein kinase CDPK1 [Source:UniProtKB/TrEMBL;Acc:S7UHK8] | transcript_product=calcium-dependent protein kinase CDPK1 | location=TGGT1_chrIV:2366836-2372193(+) | protein_length=582 | sequence_SO=chromosome | SO=protein_coding_gene | is_pseudo=false	0	FALSE	6.044	6	3	4	3	582	65.4	6.44	0	3	1.162	0.22	0.998957	781633	908131	44.04	2.38	566372	1.07871e+06	923561	892960	104432	122500	349339	892960	Peak Found	High	Peak Found	High	1
TGGT1_290600	transcript=TGGT1_290600-t26_1 | gene=TGGT1_290600 | organism=Toxoplasma_gondii_GT1 | gene_product=Succinate--CoA ligase [ADP-forming] subunit alpha, mitochondrial [Source:UniProtKB/TrEMBL;Acc:A0A125YS59] | transcript_product=succinyl-CoA-synthetase alpha SCSA | location=TGGT1_chrIX:3568986-3572521(+) | protein_length=333 | sequence_SO=chromosome | SO=protein_coding_gene | is_pseudo=false	0.003	FALSE	3.106	4	1	1	1	333	35.1	8.22	0	1	1.159	0.21	0.998957	195468	226526	NA	20.18	NA	195468	196214	261521	NA	22197.6	74218.5	261521	Not Found	Peak Found	Peak Found	High	1
TGGT1_297120	transcript=TGGT1_297120-t26_1 | gene=TGGT1_297120 | organism=Toxoplasma_gondii_GT1 | gene_product=hypothetical protein | transcript_product=hypothetical protein | location=TGGT1_chrII:1525947-1530326(+) | protein_length=760 | sequence_SO=chromosome | SO=protein_coding_gene | is_pseudo=false	0.003	FALSE	3.212	3	2	3	2	760	83.4	6.8	0	2	1.157	0.21	0.998957	163441	189097	NA	14.56	163441	NA	170531	209683	30136.4	NA	64503.9	209683	Peak Found	Not Found	High	High	1
TGGT1_225080	transcript=TGGT1_225080-t26_1 | gene=TGGT1_225080 | organism=Toxoplasma_gondii_GT1 | gene_product=Ribosomal protein RPS18 [Source:UniProtKB/TrEMBL;Acc:A0A125YQT9] | transcript_product=ribosomal protein RPS18 | location=TGGT1_chrX:2450681-2451929(+) | protein_length=156 | sequence_SO=chromosome | SO=protein_coding_gene | is_pseudo=false	0	FALSE	14.568	31	5	12	5	156	17.7	10.61	15.26	5	1.155	0.21	0.998957	8.68881e+06	1.00396e+07	1.96	8.33	8.56905e+06	8.81025e+06	9.46484e+06	1.06492e+07	1.58002e+06	1.0005e+06	3.5801e+06	1.06492e+07	High	High	High	High	1
TGGT1_263700	transcript=TGGT1_263700-t26_1 | gene=TGGT1_263700 | organism=Toxoplasma_gondii_GT1 | gene_product=Ribosomal protein RPS14 [Source:UniProtKB/TrEMBL;Acc:S7W6D1] | transcript_product=ribosomal protein RPS14 | location=TGGT1_chrVIIb:359504-361231(+) | protein_length=156 | sequence_SO=chromosome | SO=protein_coding_gene | is_pseudo=false	0	FALSE	15.383	47	5	10	5	156	16.3	10.36	17.44	5	1.153	0.21	0.998957	1.11109e+07	1.28151e+07	15.52	8.48	1.24056e+07	9.95144e+06	1.20682e+07	1.36082e+07	2.28742e+06	1.1301e+06	4.56484e+06	1.36082e+07	High	High	High	High	1
TGGT1_237140	transcript=TGGT1_237140-t26_1 | gene=TGGT1_237140 | organism=Toxoplasma_gondii_GT1 | gene_product=SOR_SNZ domain-containing protein [Source:UniProtKB/TrEMBL;Acc:S7UQ24] | transcript_product=putative ethylene inducible protein | location=TGGT1_chrX:5625979-5630291(+) | protein_length=307 | sequence_SO=chromosome | SO=protein_coding_gene | is_pseudo=false	0	FALSE	16.144	25	6	7	6	307	32.7	5.74	7.27	6	1.151	0.2	0.998957	1.56212e+06	1.79779e+06	32.15	0.86	1.96881e+06	1.23944e+06	1.78685e+06	1.80879e+06	363023	140753	675882	1.80879e+06	High	Peak Found	Peak Found	High	1	Methylthio [C49]
TGGT1_254440	transcript=TGGT1_254440-t26_1 | gene=TGGT1_254440 | organism=Toxoplasma_gondii_GT1 | gene_product=Ribosomal protein RPL12 [Source:UniProtKB/TrEMBL;Acc:A0A125YT48] | transcript_product=ribosomal protein RPL12 | location=TGGT1_chrIII:1720222-1723221(-) | protein_length=165 | sequence_SO=chromosome | SO=protein_coding_gene | is_pseudo=false	0	FALSE	10.008	16	2	4	2	165	17.8	9.42	4.42	2	1.149	0.2	0.998957	2.02468e+06	2.32595e+06	6.95	9.59	1.92756e+06	2.1267e+06	2.48937e+06	2.17327e+06	355416	241511	941610	2.17327e+06	Peak Found	Peak Found	High	High	1
TGGT1_261460	transcript=TGGT1_261460-t26_1 | gene=TGGT1_261460 | organism=Toxoplasma_gondii_GT1 | gene_product=FACT complex subunit SSRP1 [Source:UniProtKB/TrEMBL;Acc:S7WE73] | transcript_product=transcriptional elongation factor FACT80 | location=TGGT1_chrVIIb:1701910-1709548(-) | protein_length=539 | sequence_SO=chromosome | SO=protein_coding_gene | is_pseudo=false	0	FALSE	19.198	15	7	10	7	539	60.8	5.48	7.41	7	1.144	0.19	0.998957	2.94069e+06	3.36292e+06	2.6	10.18	2.88703e+06	2.99534e+06	3.12893e+06	3.6144e+06	532331	340154	1.18352e+06	3.6144e+06	High	Peak Found	High	High	1
TGGT1_219660	transcript=TGGT1_219660-t26_1 | gene=TGGT1_219660 | organism=Toxoplasma_gondii_GT1 | gene_product=hypothetical protein | transcript_product=hypothetical protein | location=TGGT1_chrXII:687294-702774(-) | protein_length=4903 | sequence_SO=chromosome | SO=protein_coding_gene | is_pseudo=false	0.045	FALSE	1.425	0	1	1	1	4903	542.3	9.33	0	1	1.143	0.19	0.998957	657569	751864	0.55	6.34	660139	655009	718897	786342	121721	74383.6	271925	786342	Peak Found	Peak Found	High	Peak Found	1
TGGT1_240060	transcript=TGGT1_240060-t26_1 | gene=TGGT1_240060 | organism=Toxoplasma_gondii_GT1 | gene_product=hypothetical protein | transcript_product=hypothetical protein | location=TGGT1_chrVI:1027949-1030621(+) | protein_length=844 | sequence_SO=chromosome | SO=protein_coding_gene | is_pseudo=false	0	FALSE	49.876	22	13	56	13	844	88.7	10.89	58.48	13	1.143	0.19	0.998957	3.0436e+07	3.478e+07	5.64	8.84	2.92461e+07	3.16742e+07	3.26702e+07	3.70262e+07	5.39261e+06	3.59696e+06	1.23576e+07	3.70262e+07	High	High	High	High	1	Methylthio [C781]
TGGT1_249250	transcript=TGGT1_249250-t26_1 | gene=TGGT1_249250 | organism=Toxoplasma_gondii_GT1 | gene_product=Ribosomal protein RPL35A [Source:UniProtKB/TrEMBL;Acc:A0A125YPQ6] | transcript_product=ribosomal protein RPL35A | location=TGGT1_chrXII:4329155-4330881(+) | protein_length=112 | sequence_SO=chromosome | SO=protein_coding_gene | is_pseudo=false	0	FALSE	6.327	17	2	4	2	112	12.8	10.95	5.82	2	1.141	0.19	0.998957	716893	818194	25.13	3.13	857963	599019	836507	800281	158197	68025.3	316411	800281	High	Peak Found	High	High	1	Methylthio [C32]
TGGT1_318560	transcript=TGGT1_318560-t26_1 | gene=TGGT1_318560 | organism=Toxoplasma_gondii_GT1 | gene_product=Protein-serine/threonine kinase [Source:UniProtKB/TrEMBL;Acc:S7UKA1] | transcript_product=ATPase/histidine kinase/DNA gyrase B/HSP90 domain-containing protein | location=TGGT1_chrIV:1166360-1172757(-) | protein_length=468 | sequence_SO=chromosome | SO=protein_coding_gene | is_pseudo=false	0.002	FALSE	4.217	5	2	3	2	468	52.7	8.92	0	2	1.141	0.19	0.998957	472789	539684	7.82	17.91	447334	499692	475154	612977	82482.5	56745.6	179728	612977	Peak Found	Peak Found	Peak Found	High	1
TGGT1_200360	transcript=TGGT1_200360-t26_1 | gene=TGGT1_200360 | organism=Toxoplasma_gondii_GT1 | gene_product=hypothetical protein | transcript_product=hypothetical protein | location=TGGT1_chrVIII:6800991-6801551(+) | protein_length=186 | sequence_SO=chromosome | SO=protein_coding_gene | is_pseudo=false	0	FALSE	11.984	29	4	7	4	186	20.2	9.61	6.75	4	1.14	0.19	0.998957	2.17934e+06	2.4842e+06	12.68	4.53	1.9919e+06	2.38442e+06	2.40594e+06	2.56501e+06	367280	270778	910053	2.56501e+06	Peak Found	Peak Found	High	High	1
TGGT1_227620	transcript=TGGT1_227620-t26_1 | gene=TGGT1_227620 | organism=Toxoplasma_gondii_GT1 | gene_product=Dense granule protein GRA2 [Source:UniProtKB/TrEMBL;Acc:S7UXS8] | transcript_product=dense granule protein GRA2 | location=TGGT1_chrX:779857-780655(-) | protein_length=185 | sequence_SO=chromosome | SO=protein_coding_gene | is_pseudo=false	0	FALSE	14.545	28	5	12	5	185	19.8	9	8.82	5	1.139	0.19	0.998957	7.27268e+06	8.28171e+06	6.57	1.06	7.61861e+06	6.94246e+06	8.34408e+06	8.2198e+06	1.40477e+06	788394	3.15617e+06	8.2198e+06	Peak Found	High	High	High	1
TGGT1_233040	transcript=TGGT1_233040-t26_1 | gene=TGGT1_233040 | organism=Toxoplasma_gondii_GT1 | gene_product=Phosphodiesterase [Source:UniProtKB/TrEMBL;Acc:S7V324] | transcript_product=3'5'-cyclic nucleotide phosphodiesterase domain-containing protein | location=TGGT1_chrVIII:2353743-2371272(-) | protein_length=1731 | sequence_SO=chromosome | SO=protein_coding_gene | is_pseudo=false	0.036	FALSE	1.534	1	1	1	1	1731	194.9	5.73	0	1	1.139	0.19	0.998957	146402	166748	0.09	6.03	146495	146310	174016	159784	27011.7	16615.1	65821.8	159784	Peak Found	Peak Found	Peak Found	High	1
TGGT1_247470	transcript=TGGT1_247470-t26_1 | gene=TGGT1_247470 | organism=Toxoplasma_gondii_GT1 | gene_product=Nop domain-containing protein [Source:UniProtKB/TrEMBL;Acc:A0A125YGZ6] | transcript_product=putative nucleolar protein | location=TGGT1_chrXII:3291010-3295334(+) | protein_length=536 | sequence_SO=chromosome | SO=protein_coding_gene | is_pseudo=false	0	FALSE	31.382	25	11	16	11	536	59.9	8.15	24.36	11	1.139	0.19	0.998957	5.45195e+06	6.21005e+06	2.57	1.51	5.55208e+06	5.35363e+06	6.2769e+06	6.14392e+06	1.02373e+06	607964	2.37425e+06	6.14392e+06	High	High	High	High	1	Methylthio [C113]
TGGT1_300200	transcript=TGGT1_300200-t26_1 | gene=TGGT1_300200 | organism=Toxoplasma_gondii_GT1 | gene_product=Histone H2A [Source:UniProtKB/TrEMBL;Acc:A0A125YP80] | transcript_product=histone H2AZ | location=TGGT1_chrXII:122117-123855(-) | protein_length=155 | sequence_SO=chromosome | SO=protein_coding_gene | is_pseudo=false	0	FALSE	12.304	26	4	25	3	155	15.9	10.62	62.5	4	1.139	0.19	0.998957	2.68968e+07	3.06383e+07	17.82	1.38	3.05284e+07	2.36971e+07	3.03415e+07	3.09379e+07	5.62904e+06	2.69108e+06	1.14768e+07	3.09379e+07	High	High	High	High	1
TGGT1_262670	transcript=TGGT1_262670-t26_1 | gene=TGGT1_262670 | organism=Toxoplasma_gondii_GT1 | gene_product=60S ribosomal protein L18a [Source:UniProtKB/TrEMBL;Acc:A0A125YSP4] | transcript_product=ribosomal protein RPL18A | location=TGGT1_chrVIIb:1067095-1069205(+) | protein_length=183 | sequence_SO=chromosome | SO=protein_coding_gene | is_pseudo=false	0	FALSE	15.718	36	6	11	6	183	21.3	10.65	13.73	6	1.138	0.19	0.998957	7.18049e+06	8.17335e+06	0.39	5.83	7.16049e+06	7.20054e+06	7.84313e+06	8.51747e+06	1.3203e+06	817702	2.96668e+06	8.51747e+06	High	Peak Found	High	High	1
TGGT1_300310	transcript=TGGT1_300310-t26_1 | gene=TGGT1_300310 | organism=Toxoplasma_gondii_GT1 | gene_product=AAA domain-containing protein [Source:UniProtKB/TrEMBL;Acc:S7UGY0] | transcript_product=26S proteasome regulatory subunit, S6a family AAA ATpase | location=TGGT1_chrXII:55218-62332(-) | protein_length=427 | sequence_SO=chromosome | SO=protein_coding_gene | is_pseudo=false	0.011	FALSE	2.313	4	1	1	1	427	47.8	5.3	2.02	1	1.138	0.19	0.998957	135609	154348	19.95	37.16	156305	117654	117936	202001	28820.6	13360.9	44609.6	202001	Peak Found	Peak Found	Peak Found	High	1
TGGT1_242330	transcript=TGGT1_242330-t26_1 | gene=TGGT1_242330 | organism=Toxoplasma_gondii_GT1 | gene_product=Ribosomal_S7 domain-containing protein [Source:UniProtKB/TrEMBL;Acc:A0A125YNF8] | transcript_product=ribosomal protein RPS5 | location=TGGT1_chrVI:1882939-1884008(-) | protein_length=192 | sequence_SO=chromosome | SO=protein_coding_gene | is_pseudo=false	0	FALSE	29.188	63	11	18	11	192	21.6	9.74	20.67	11	1.137	0.18	0.998957	1.28868e+07	1.46483e+07	21.94	12.45	1.50691e+07	1.10206e+07	1.34104e+07	1.60005e+07	2.77854e+06	1.25152e+06	5.0725e+06	1.60005e+07	High	High	High	High	1	Methylthio [C34; C54; C143; C160; C168]
TGGT1_226380	transcript=TGGT1_226380-t26_1 | gene=TGGT1_226380 | organism=Toxoplasma_gondii_GT1 | gene_product=hypothetical protein | transcript_product=hypothetical protein | location=TGGT1_chrX:1583226-1584362(+) | protein_length=378 | sequence_SO=chromosome | SO=protein_coding_gene | is_pseudo=false	0	FALSE	34.726	37	12	21	12	378	42.6	9.26	30.82	12	1.136	0.18	0.998957	3.63394e+06	4.12813e+06	1.9	7.79	3.58553e+06	3.68301e+06	3.90663e+06	4.36219e+06	661125	418247	1.47769e+06	4.36219e+06	High	High	High	High	1
TGGT1_260190	transcript=TGGT1_260190-t26_1 | gene=TGGT1_260190 | organism=Toxoplasma_gondii_GT1 | gene_product=Microneme protein MIC13 [Source:UniProtKB/TrEMBL;Acc:S7UYL3] | transcript_product=microneme protein MIC13 | location=TGGT1_chrVIIb:2444928-2447434(+) | protein_length=468 | sequence_SO=chromosome | SO=protein_coding_gene | is_pseudo=false	0.013	FALSE	2.156	3	1	1	1	468	51.4	6.33	0	1	1.136	0.18	0.998957	124204	141067	7.84	12.3	117497	131294	129286	153921	21664.9	14909.9	48902.8	153921	Peak Found	Peak Found	Peak Found	High	1
TGGT1_244000	transcript=TGGT1_244000-t26_1 | gene=TGGT1_244000 | organism=Toxoplasma_gondii_GT1 | gene_product=RNA helicase [Source:UniProtKB/TrEMBL;Acc:S7UFQ1] | transcript_product=DEAD/DEAH box helicase domain-containing protein | location=TGGT1_chrVI:2860216-2869406(+) | protein_length=1009 | sequence_SO=chromosome | SO=protein_coding_gene | is_pseudo=false	0.013	FALSE	2.157	1	1	1	1	1009	111.6	8.05	0	1	1.135	0.18	0.998957	72820.1	82629.5	NA	13.73	72820.1	NA	74963.1	91080	13427.1	NA	28355	91080	Peak Found	Not Found	Peak Found	High	1
TGGT1_245432	transcript=TGGT1_245432-t26_1 | gene=TGGT1_245432 | organism=Toxoplasma_gondii_GT1 | gene_product=hypothetical protein | transcript_product=hypothetical protein | location=TGGT1_chrXII:2190528-2192456(-) | protein_length=411 | sequence_SO=chromosome | SO=protein_coding_gene | is_pseudo=false	0.002	FALSE	3.838	4	2	3	2	411	46	9.51	1.61	2	1.132	0.18	0.998957	389261	440696	32.35	19.97	491338	308390	508004	382307	90596.4	35021.2	192154	382307	Peak Found	Peak Found	High	High	1
TGGT1_255190	transcript=TGGT1_255190-t26_1 | gene=TGGT1_255190 | organism=Toxoplasma_gondii_GT1 | gene_product=Myosin motor domain-containing protein [Source:UniProtKB/TrEMBL;Acc:S7WI35] | transcript_product=myosin C | location=TGGT1_chrVIIb:4925758-4933694(+) | protein_length=1171 | sequence_SO=chromosome | SO=protein_coding_gene | is_pseudo=false	0	FALSE	33.784	14	13	17	13	1171	132.6	7.91	12.19	13	1.132	0.18	0.998957	4.55234e+06	5.15247e+06	18.58	2.16	5.19539e+06	3.98889e+06	5.07426e+06	5.23189e+06	957963	452983	1.91935e+06	5.23189e+06	Peak Found	High	High	High	1	Methylthio [C964]
TGGT1_270240	transcript=TGGT1_270240-t26_1 | gene=TGGT1_270240 | organism=Toxoplasma_gondii_GT1 | gene_product=MAG1 protein [Source:UniProtKB/TrEMBL;Acc:S7V482] | transcript_product=MAG1 protein | location=TGGT1_chrVIII:5310162-5311630(+) | protein_length=452 | sequence_SO=chromosome | SO=protein_coding_gene | is_pseudo=false	0	FALSE	39.933	34	12	30	12	452	49.2	4.96	36.05	12	1.13	0.18	0.998957	2.95541e+07	3.33856e+07	10.35	3.69	3.18024e+07	2.74647e+07	3.2525e+07	3.42689e+07	5.86395e+06	3.11893e+06	1.23027e+07	3.42689e+07	High	High	High	High	1	Methylthio [C297; C308]
TGGT1_252360	transcript=TGGT1_252360-t26_1 | gene=TGGT1_252360 | organism=Toxoplasma_gondii_GT1 | gene_product=Protein kinase domain-containing protein [Source:UniProtKB/TrEMBL;Acc:S7VW28] | transcript_product=rhoptry kinase family protein ROP24 (incomplete catalytic triad) | location=TGGT1_chrIII:494762-496369(+) | protein_length=535 | sequence_SO=chromosome | SO=protein_coding_gene | is_pseudo=false	0	FALSE	30.696	24	9	17	9	535	60.8	9.45	15.73	9	1.125	0.17	0.998957	6.43438e+06	7.23729e+06	3.87	6.04	6.26075e+06	6.61283e+06	6.93469e+06	7.5531e+06	1.1544e+06	750961	2.62306e+06	7.5531e+06	Peak Found	High	High	High	1
TGGT1_290850	transcript=TGGT1_290850-t26_1 | gene=TGGT1_290850 | organism=Toxoplasma_gondii_GT1 | gene_product=WD-40 repeat protein [Source:UniProtKB/TrEMBL;Acc:A0A125YRT1] | transcript_product=WD-40 repeat protein | location=TGGT1_chrIX:3694338-3701606(-) | protein_length=521 | sequence_SO=chromosome | SO=protein_coding_gene | is_pseudo=false	0.012	FALSE	2.249	3	1	1	1	521	58.3	6.67	0	1	1.125	0.17	0.998957	138159	155373	3.88	9.07	142007	134416	165678	145709	26184.2	15264.5	62668.2	145709	Peak Found	Peak Found	Peak Found	High	1
TGGT1_318525	transcript=TGGT1_318525-t26_1 | gene=TGGT1_318525 | organism=Toxoplasma_gondii_GT1 | gene_product=hypothetical protein | transcript_product=hypothetical protein | location=TGGT1_chrIV:1192489-1200329(-) | protein_length=1182 | sequence_SO=chromosome | SO=protein_coding_gene | is_pseudo=false	0	FALSE	4.337	3	2	2	2	1182	127.8	8.22	0	2	1.124	0.17	0.998957	667315	750185	53.78	6.75	995882	447151	715213	786867	183628	50779	270531	786867	Peak Found	Peak Found	Peak Found	High	1
TGGT1_291330	transcript=TGGT1_291330-t26_1 | gene=TGGT1_291330 | organism=Toxoplasma_gondii_GT1 | gene_product=RRM domain-containing protein [Source:UniProtKB/TrEMBL;Acc:A0A125YM75] | transcript_product=RNA recognition motif-containing protein | location=TGGT1_chrIX:4055101-4057671(+) | protein_length=228 | sequence_SO=chromosome | SO=protein_coding_gene | is_pseudo=false	0	FALSE	14.052	26	6	7	6	228	25.5	10.51	4.01	6	1.123	0.17	0.998957	2.3764e+06	2.66793e+06	16.91	5.15	2.67973e+06	2.1074e+06	2.76685e+06	2.57255e+06	494107	239319	1.04657e+06	2.57255e+06	High	Peak Found	High	High	1	Methylthio [C163]
TGGT1_411760	transcript=TGGT1_411760-t26_1 | gene=TGGT1_411760 | organism=Toxoplasma_gondii_GT1 | gene_product=Actin [Source:UniProtKB/TrEMBL;Acc:S7VNC9] | transcript_product=actin | location=AAQM03000536:57-991(+) | protein_length=287 | sequence_SO=contig | SO=protein_coding_gene | is_pseudo=false	0	FALSE	51.695	33	9	107	9	287	32	6.04	199.57	9	1.122	0.17	0.998957	4.51955e+08	5.07051e+08	12.43	6	4.93596e+08	4.13827e+08	4.85978e+08	5.29038e+08	9.10127e+07	4.69947e+07	1.83822e+08	5.29038e+08	High	High	High	High	1
TGGT1_229950	transcript=TGGT1_229950-t26_1 | gene=TGGT1_229950 | organism=Toxoplasma_gondii_GT1 | gene_product=AAA domain-containing protein [Source:UniProtKB/TrEMBL;Acc:A0A125YVJ5] | transcript_product=putative 26S proteasome regulatory subunit 6b | location=TGGT1_chrVIII:482161-488358(+) | protein_length=409 | sequence_SO=chromosome | SO=protein_coding_gene | is_pseudo=false	0.001	FALSE	3.666	5	2	2	2	409	46.1	6.13	0	2	1.121	0.16	0.998957	697969	782219	13.77	5.32	633001	769604	753338	812207	116717	87397.2	284952	812207	Peak Found	Peak Found	Peak Found	High	1
TGGT1_271360	transcript=TGGT1_271360-t26_1 | gene=TGGT1_271360 | organism=Toxoplasma_gondii_GT1 | gene_product=hypothetical protein | transcript_product=hypothetical protein | location=TGGT1_chrVIII:4543139-4545539(+) | protein_length=464 | sequence_SO=chromosome | SO=protein_coding_gene | is_pseudo=false	0.044	FALSE	1.433	2	1	1	1	464	50.4	10.07	0	1	1.118	0.16	0.998957	126068	140992	25.34	4.22	151098	105185	136845	145264	27860.4	11944.9	51762.1	145264	Peak Found	Peak Found	Peak Found	High	1
TGGT1_207440	transcript=TGGT1_207440-t26_1 | gene=TGGT1_207440 | organism=Toxoplasma_gondii_GT1 | gene_product=S4 RNA-binding domain-containing protein [Source:UniProtKB/TrEMBL;Acc:A0A125YYJ0] | transcript_product=ribosomal protein RPS4 | location=TGGT1_chrIb:77395-80548(-) | protein_length=312 | sequence_SO=chromosome | SO=protein_coding_gene | is_pseudo=false	0	FALSE	19.819	30	9	15	9	312	35.5	10.18	10.82	9	1.117	0.16	0.998957	8.42621e+06	9.4088e+06	6.17	14.13	8.80208e+06	8.06639e+06	8.51158e+06	1.04006e+07	1.62299e+06	916029	3.21953e+06	1.04006e+07	High	High	High	High	1	Methylthio [C130]
TGGT1_320450	transcript=TGGT1_320450-t26_1 | gene=TGGT1_320450 | organism=Toxoplasma_gondii_GT1 | gene_product=Ribosome biogenesis regulatory protein [Source:UniProtKB/TrEMBL;Acc:S7VSP0] | transcript_product=ribosome biogenesis regulatory protein (rrs1) protein | location=TGGT1_chrIV:287536-291495(-) | protein_length=319 | sequence_SO=chromosome | SO=protein_coding_gene | is_pseudo=false	0	FALSE	7.593	11	3	4	3	319	35.7	10.11	3.71	3	1.117	0.16	0.998957	412867	461164	3.33	10.38	403256	422708	428470	496352	74355.1	48003.2	162070	496352	High	Peak Found	Peak Found	High	1
TGGT1_295680	transcript=TGGT1_295680-t26_1 | gene=TGGT1_295680 | organism=Toxoplasma_gondii_GT1 | gene_product=Putative periodic tryptophan protein PWP2 [Source:UniProtKB/TrEMBL;Acc:A0A125YFJ1] | transcript_product=putative periodic tryptophan protein PWP2 | location=TGGT1_chrIa:1595494-1604605(-) | protein_length=1266 | sequence_SO=chromosome | SO=protein_coding_gene | is_pseudo=false	0	FALSE	9.098	4	4	4	4	1266	136.7	8.57	1.66	4	1.116	0.16	0.998957	522489	582847	13.08	8.02	573274	476203	616914	550661	105704	54078.1	233349	550661	Peak Found	Peak Found	High	High	1
TGGT1_250810	transcript=TGGT1_250810-t26_1 | gene=TGGT1_250810 | organism=Toxoplasma_gondii_GT1 | gene_product=Ribosomal protein RPL35 [Source:UniProtKB/TrEMBL;Acc:A0A125YPP2] | transcript_product=ribosomal protein RPL35 | location=TGGT1_chrXII:5165995-5168354(-) | protein_length=178 | sequence_SO=chromosome | SO=protein_coding_gene | is_pseudo=false	0.009	FALSE	2.434	4	1	2	1	178	20.1	11.3	1.79	1	1.113	0.16	0.998957	1.60218e+06	1.78395e+06	8.87	4.03	1.50463e+06	1.70605e+06	1.73385e+06	1.8355e+06	277434	193741	655834	1.8355e+06	Peak Found	Peak Found	High	High	1
TGGT1_280380	transcript=TGGT1_280380-t26_1 | gene=TGGT1_280380 | organism=Toxoplasma_gondii_GT1 | gene_product=Poly(ADP-ribose) glycohydrolase [Source:UniProtKB/TrEMBL;Acc:S7W2K3] | transcript_product=poly(ADP-ribose) glycohydrolase | location=TGGT1_chrVIIa:467123-469417(+) | protein_length=553 | sequence_SO=chromosome | SO=protein_coding_gene | is_pseudo=false	0	FALSE	11.186	12	4	5	4	553	61.8	7.94	4.46	4	1.112	0.15	0.998957	868852	966027	7.4	0.73	915539	824546	971013	961067	168813	93636.5	367288	961067	Peak Found	Peak Found	High	High	1
TGGT1_313430	transcript=TGGT1_313430-t26_1 | gene=TGGT1_313430 | organism=Toxoplasma_gondii_GT1 | gene_product=hypothetical protein | transcript_product=hypothetical protein | location=TGGT1_chrXI:3334289-3356350(+) | protein_length=5639 | sequence_SO=chromosome | SO=protein_coding_gene | is_pseudo=false	0	FALSE	16.465	2	7	8	7	5639	593	6.8	2.62	7	1.112	0.15	0.998957	1.0702e+06	1.19038e+06	22.64	11.96	1.25775e+06	910615	1.29572e+06	1.0936e+06	231912	103411	490111	1.0936e+06	High	Peak Found	High	High	1
TGGT1_314810	transcript=TGGT1_314810-t26_1 | gene=TGGT1_314810 | organism=Toxoplasma_gondii_GT1 | gene_product=Ribosomal protein RPL7 [Source:UniProtKB/TrEMBL;Acc:A0A125YUF5] | transcript_product=ribosomal protein RPL7 | location=TGGT1_chrXI:4256933-4260657(+) | protein_length=258 | sequence_SO=chromosome | SO=protein_coding_gene | is_pseudo=false	0	FALSE	11.4	17	4	10	4	258	30.1	10.36	8.96	4	1.11	0.15	0.998957	3.61254e+06	4.00908e+06	18.91	22.62	4.13265e+06	3.15789e+06	3.41175e+06	4.711e+06	762007	358614	1.2905e+06	4.711e+06	High	High	High	High	1
TGGT1_219800	transcript=TGGT1_219800-t26_1 | gene=TGGT1_219800 | organism=Toxoplasma_gondii_GT1 | gene_product=Vacuolar proton pump subunit B [Source:UniProtKB/TrEMBL;Acc:A0A125YPJ0] | transcript_product=putative vacuolar ATP synthase subunit b | location=TGGT1_chrXII:574692-577426(+) | protein_length=505 | sequence_SO=chromosome | SO=protein_coding_gene | is_pseudo=false	0	FALSE	6.482	8	3	3	3	505	56.6	5.4	0	3	1.106	0.15	0.998957	371557	410978	8.41	11.13	350093	394338	379824	444687	64552.5	44781.5	143669	444687	Peak Found	Peak Found	Peak Found	High	1	Methylthio [C139; C145]
TGGT1_240430	transcript=TGGT1_240430-t26_1 | gene=TGGT1_240430 | organism=Toxoplasma_gondii_GT1 | gene_product=Glyoxalase domain-containing protein [Source:UniProtKB/TrEMBL;Acc:S7USC0] | transcript_product=glyoxalase family protein | location=TGGT1_chrVI:1244779-1250893(-) | protein_length=1114 | sequence_SO=chromosome | SO=protein_coding_gene | is_pseudo=false	0.037	FALSE	1.514	1	1	1	1	1114	122.3	6.28	0	1	1.105	0.14	0.998957	187257	206921	15.89	6.61	209618	167280	197459	216837	38650.8	18996.6	74689.3	216837	Peak Found	Peak Found	High	Peak Found	1
TGGT1_246500	transcript=TGGT1_246500-t26_1 | gene=TGGT1_246500 | organism=Toxoplasma_gondii_GT1 | gene_product=Surp module domain-containing protein [Source:UniProtKB/TrEMBL;Acc:S7W9J0] | transcript_product=surp module domain-containing protein | location=TGGT1_chrXII:2735052-2739526(-) | protein_length=658 | sequence_SO=chromosome | SO=protein_coding_gene | is_pseudo=false	0	FALSE	6.273	6	3	3	3	658	71.7	4.93	1.79	3	1.105	0.14	0.998957	329768	364502	21.1	0.83	383263	283740	362375	366642	70668.7	32221.8	137069	366642	Peak Found	Peak Found	Peak Found	High	1
TGGT1_247440	transcript=TGGT1_247440-t26_1 | gene=TGGT1_247440 | organism=Toxoplasma_gondii_GT1 | gene_product=hypothetical protein | transcript_product=hypothetical protein | location=TGGT1_chrXII:3270269-3271405(-) | protein_length=378 | sequence_SO=chromosome | SO=protein_coding_gene | is_pseudo=false	0	FALSE	20.412	26	6	8	6	378	40.1	9.66	7.86	6	1.105	0.14	0.998957	2.48448e+06	2.7465e+06	15.81	3.77	2.22071e+06	2.77957e+06	2.67417e+06	2.82079e+06	409470	315652	1.01151e+06	2.82079e+06	Peak Found	Peak Found	High	High	1
TGGT1_289970	transcript=TGGT1_289970-t26_1 | gene=TGGT1_289970 | organism=Toxoplasma_gondii_GT1 | gene_product=hypothetical protein | transcript_product=hypothetical protein | location=TGGT1_chrIX:3366173-3367777(+) | protein_length=232 | sequence_SO=chromosome | SO=protein_coding_gene | is_pseudo=false	0	FALSE	8.064	23	3	7	3	232	24.5	11.66	4.62	3	1.105	0.14	0.998957	1.2831e+06	1.4172e+06	53.73	32.08	1.91416e+06	860094	1.12501e+06	1.78528e+06	352945	97673.3	425538	1.78528e+06	High	Peak Found	High	High	1
TGGT1_288860	transcript=TGGT1_288860-t26_1 | gene=TGGT1_288860 | organism=Toxoplasma_gondii_GT1 | gene_product=RuvB-like helicase [Source:UniProtKB/TrEMBL;Acc:A0A125YQV7] | transcript_product=RuvB family 2 protein | location=TGGT1_chrIX:2586575-2593961(-) | protein_length=508 | sequence_SO=chromosome | SO=protein_coding_gene | is_pseudo=false	0	FALSE	11.487	12	5	6	5	508	55.4	5.95	0	5	1.104	0.14	0.998957	657095	725327	53.3	7.32	442055	976743	688706	763895	81509.1	110920	260505	763895	Peak Found	Peak Found	High	High	1
TGGT1_273760	transcript=TGGT1_273760-t26_1 | gene=TGGT1_273760 | organism=Toxoplasma_gondii_GT1 | gene_product=Heat shock protein HSP70 [Source:UniProtKB/TrEMBL;Acc:A0A125YP12] | transcript_product=heat shock protein HSP70 | location=TGGT1_chrVIII:3285695-3287698(-) | protein_length=667 | sequence_SO=chromosome | SO=protein_coding_gene | is_pseudo=false	0	FALSE	60.559	33	18	48	16	667	72.2	5.2	78.9	18	1.102	0.14	0.998957	3.03682e+07	3.3479e+07	8.51	3.77	2.85919e+07	3.22549e+07	3.43845e+07	3.25974e+07	5.27197e+06	3.6629e+06	1.3006e+07	3.25974e+07	High	High	High	High	1	Methylthio [C242; C308; C605]
TGGT1_288650	transcript=TGGT1_288650-t26_1 | gene=TGGT1_288650 | organism=Toxoplasma_gondii_GT1 | gene_product=Dense granule protein GRA12 [Source:UniProtKB/TrEMBL;Acc:S7VY87] | transcript_product=dense granule protein GRA12 | location=TGGT1_chrIX:2467879-2469672(-) | protein_length=436 | sequence_SO=chromosome | SO=protein_coding_gene | is_pseudo=false	0	FALSE	55.1	49	16	60	16	436	47.9	9.2	117.12	16	1.101	0.14	0.998957	5.15345e+07	5.67454e+07	16.09	7.75	5.77744e+07	4.59686e+07	5.37166e+07	5.9945e+07	1.06528e+07	5.22025e+06	2.03184e+07	5.9945e+07	High	High	High	High	1	Methylthio [C68; C289; C307]
TGGT1_305240	transcript=TGGT1_305240-t26_1 | gene=TGGT1_305240 | organism=Toxoplasma_gondii_GT1 | gene_product=Suf domain-containing protein [Source:UniProtKB/TrEMBL;Acc:S7UI45] | transcript_product=XPA binding protein 2 family protein | location=TGGT1_chrIX:5084920-5092537(+) | protein_length=966 | sequence_SO=chromosome | SO=protein_coding_gene | is_pseudo=false	0	FALSE	5.126	3	2	2	2	966	111.5	6.06	0	2	1.1	0.14	0.998957	8.64575e+06	9.51458e+06	26.64	16.35	1.04619e+07	7.14489e+06	8.47132e+06	1.06863e+07	1.92903e+06	811383	3.2043e+06	1.06863e+07	Peak Found	Peak Found	Peak Found	High	1
TGGT1_254720	transcript=TGGT1_254720-t26_1 | gene=TGGT1_254720 | organism=Toxoplasma_gondii_GT1 | gene_product=Dense granule protein GRA8 [Source:UniProtKB/TrEMBL;Acc:A0A125YYI5] | transcript_product=dense granule protein GRA8 | location=TGGT1_chrIII:1884681-1885484(+) | protein_length=267 | sequence_SO=chromosome | SO=protein_coding_gene | is_pseudo=false	0	FALSE	21.525	15	4	32	4	267	28.5	10.76	54.16	4	1.099	0.14	0.998957	2.06368e+07	2.26884e+07	10.31	14.5	1.91832e+07	2.22005e+07	2.04704e+07	2.51466e+07	3.53713e+06	2.52112e+06	7.74298e+06	2.51466e+07	High	High	High	High	1	Phospho [S201]
TGGT1_226660	transcript=TGGT1_226660-t26_1 | gene=TGGT1_226660 | organism=Toxoplasma_gondii_GT1 | gene_product=hypothetical protein | transcript_product=hypothetical protein | location=TGGT1_chrX:1361506-1380909(+) | protein_length=3736 | sequence_SO=chromosome | SO=protein_coding_gene | is_pseudo=false	0.002	FALSE	4.009	0	2	2	2	3736	389.6	5.53	1.8	2	1.096	0.13	0.998957	185284	202997	NA	1.22	185284	NA	204752	201256	34163.9	NA	77448.1	201256	Peak Found	Not Found	Peak Found	High	1
TGGT1_309120	transcript=TGGT1_309120-t26_1 | gene=TGGT1_309120 | organism=Toxoplasma_gondii_GT1 | gene_product=Ribos_L4_asso_C domain-containing protein [Source:UniProtKB/TrEMBL;Acc:A0A125YTR1] | transcript_product=ribosomal protein RPL4 | location=TGGT1_chrXI:476484-477734(-) | protein_length=416 | sequence_SO=chromosome | SO=protein_coding_gene | is_pseudo=false	0	FALSE	28.464	28	9	17	9	416	45.7	11.18	21.39	9	1.096	0.13	0.998957	6.7649e+06	7.41385e+06	12.35	9.89	7.38409e+06	6.19763e+06	6.91231e+06	7951778	1.36153e+06	703811	2.6146e+06	7951778	High	High	High	High	1	Methylthio [C96; C251]
TGGT1_318700	transcript=TGGT1_318700-t26_1 | gene=TGGT1_318700 | organism=Toxoplasma_gondii_GT1 | gene_product=Eukaryotic translation initiation factor 6 [Source:UniProtKB/TrEMBL;Acc:S7UJK7] | transcript_product=putative eukaryotic initiation factor-6 | location=TGGT1_chrIV:1082314-1085682(+) | protein_length=264 | sequence_SO=chromosome | SO=protein_coding_gene | is_pseudo=false	0.003	FALSE	3.19	6	1	1	1	264	28.6	5.2	0	1	1.096	0.13	0.998957	132373	145102	21.59	2.79	154391	113495	147998	142262	28467.7	12888.7	55980.7	142262	Peak Found	Peak Found	Peak Found	High	1
TGGT1_207620	transcript=TGGT1_207620-t26_1 | gene=TGGT1_207620 | organism=Toxoplasma_gondii_GT1 | gene_product=Rieske domain-containing protein [Source:UniProtKB/TrEMBL;Acc:S7VY56] | transcript_product=pyridine nucleotide-disulfide oxidoreductase domain-containing protein | location=TGGT1_chrIb:171089-178693(-) | protein_length=664 | sequence_SO=chromosome | SO=protein_coding_gene | is_pseudo=false	0.011	FALSE	2.309	3	1	1	1	664	71.2	8.98	0	1	1.095	0.13	0.998957	42226.4	46236.3	64.42	NA	25827.2	69038.5	46236.3	NA	4762.19	7840.1	17489	NA	Peak Found	Peak Found	High	Not Found	1
TGGT1_305180	transcript=TGGT1_305180-t26_1 | gene=TGGT1_305180 | organism=Toxoplasma_gondii_GT1 | gene_product=Na_H_Exchanger domain-containing protein [Source:UniProtKB/TrEMBL;Acc:S7UI51] | transcript_product=Na+/H+ exchanger NHE3 | location=TGGT1_chrIX:5043402-5051565(-) | protein_length=1565 | sequence_SO=chromosome | SO=protein_coding_gene | is_pseudo=false	0.036	FALSE	1.534	1	1	1	1	1565	167.1	7.78	0	1	1.094	0.13	0.998957	667409	729823	22.62	1.97	567977	784246	719749	740037	104728	89060	272247	740037	Peak Found	Peak Found	Peak Found	High	1
TGGT1_262920	transcript=TGGT1_262920-t26_1 | gene=TGGT1_262920 | organism=Toxoplasma_gondii_GT1 | gene_product=PDZ_3 domain-containing protein [Source:UniProtKB/TrEMBL;Acc:S7UXW4] | transcript_product=trypsin domain-containing protein | location=TGGT1_chrVIIb:896939-905694(+) | protein_length=972 | sequence_SO=chromosome | SO=protein_coding_gene | is_pseudo=false	0	FALSE	26.527	11	9	15	9	972	104.4	6.52	16.22	9	1.092	0.13	0.998957	3.48292e+06	3.80456e+06	26.02	7.55	4.19543e+06	2.89142e+06	3.60661e+06	4.01336e+06	773582	328353	1.36421e+06	4.01336e+06	High	Peak Found	High	High	1
TGGT1_201700	transcript=TGGT1_201700-t26_1 | gene=TGGT1_201700 | organism=Toxoplasma_gondii_GT1 | gene_product=WD_REPEATS_REGION domain-containing protein [Source:UniProtKB/TrEMBL;Acc:A0A125YTV7] | transcript_product=WD domain, G-beta repeat-containing protein | location=TGGT1_chrVIIa:3740764-3744193(-) | protein_length=654 | sequence_SO=chromosome | SO=protein_coding_gene | is_pseudo=false	0.003	FALSE	3.093	3	1	1	1	654	67.4	7.47	0	1	1.09	0.12	0.998957	90089.5	98191.6	NA	2.35	NA	90089.5	96575.3	99835	NA	10230.7	36529.9	99835	Not Found	Peak Found	Peak Found	High	1
TGGT1_288680	transcript=TGGT1_288680-t26_1 | gene=TGGT1_288680 | organism=Toxoplasma_gondii_GT1 | gene_product=AP_endonuc_2 domain-containing protein [Source:UniProtKB/TrEMBL;Acc:S7UPI6] | transcript_product=endonuclease IV APN | location=TGGT1_chrIX:2479130-2484087(-) | protein_length=667 | sequence_SO=chromosome | SO=protein_coding_gene | is_pseudo=false	0.005	FALSE	2.558	4	1	1	1	667	72.3	8.82	0	1	1.09	0.12	0.998957	98467.3	107294	7.01	11.05	93702.2	103475	99214.5	116031	17277.5	11750.7	37528.1	116031	Peak Found	Peak Found	Peak Found	High	1
TGGT1_221670	transcript=TGGT1_221670-t26_1 | gene=TGGT1_221670 | organism=Toxoplasma_gondii_GT1 | gene_product=Transcriptional elongation factor FACT140 [Source:UniProtKB/TrEMBL;Acc:S7ULL0] | transcript_product=transcriptional elongation factor FACT140 | location=TGGT1_chrII:521099-534404(-) | protein_length=1198 | sequence_SO=chromosome | SO=protein_coding_gene | is_pseudo=false	0	FALSE	55.81	25	20	34	20	1198	134.5	5.21	28.26	20	1.087	0.12	0.998957	8.90228e+06	9.67773e+06	4.69	0.06	9.20258e+06	8.61179e+06	9.68153e+06	9.67393e+06	1696835	977965	3.66206e+06	9.67393e+06	High	High	High	High	1	Methylthio [C430; C656; C702]
TGGT1_222170	transcript=TGGT1_222170-t26_1 | gene=TGGT1_222170 | organism=Toxoplasma_gondii_GT1 | gene_product=Dense-granule antigen DG32 [Source:UniProtKB/TrEMBL;Acc:A0A125YI16] | transcript_product=dense-granule antigen DG32 | location=TGGT1_chrII:911318-912642(+) | protein_length=300 | sequence_SO=chromosome | SO=protein_coding_gene | is_pseudo=false	0	FALSE	7.328	13	3	5	3	300	33.6	9.38	6.04	3	1.086	0.12	0.998957	503107	546373	10.42	4.94	467292	541666	527612	565802	86162.5	61512.3	199571	565802	High	Peak Found	High	High	1
TGGT1_266400	transcript=TGGT1_266400-t26_1 | gene=TGGT1_266400 | organism=Toxoplasma_gondii_GT1 | gene_product=hypothetical protein | transcript_product=hypothetical protein | location=TGGT1_chrIX:987434-999664(+) | protein_length=960 | sequence_SO=chromosome | SO=protein_coding_gene | is_pseudo=false	0.009	FALSE	2.418	1	1	1	1	960	104.7	8.62	1.74	1	1.086	0.12	0.998957	85969.7	93373.2	10.74	16.19	92768.4	79669.3	83233	104749	17105.3	9047.34	31483.1	104749	Peak Found	Peak Found	Peak Found	High	1
TGGT1_236650	transcript=TGGT1_236650-t26_1 | gene=TGGT1_236650 | organism=Toxoplasma_gondii_GT1 | gene_product=DEAD (Asp-Glu-Ala-Asp) box polypeptide 17 [Source:UniProtKB/TrEMBL;Acc:A0A125YWJ5] | transcript_product=DEAD (Asp-Glu-Ala-Asp) box polypeptide 17 | location=TGGT1_chrX:5362273-5365892(-) | protein_length=550 | sequence_SO=chromosome | SO=protein_coding_gene | is_pseudo=false	0	FALSE	53.322	44	18	44	18	550	59.9	8.94	46.64	18	1.084	0.12	0.998957	2.06471e+07	2.23743e+07	13.45	12	2.27131e+07	1.87691e+07	2.05506e+07	2.43598e+07	4.18799e+06	2.13144e+06	7.77333e+06	2.43598e+07	High	High	High	High	1	Methylthio [C256; C259; C346]
TGGT1_294560	transcript=TGGT1_294560-t26_1 | gene=TGGT1_294560 | organism=Toxoplasma_gondii_GT1 | gene_product=Protein kinase domain-containing protein [Source:UniProtKB/TrEMBL;Acc:A0A125YK13] | transcript_product=rhoptry kinase family protein ROP37 (incomplete catalytic triad) | location=TGGT1_chrIa:950597-952927(-) | protein_length=776 | sequence_SO=chromosome | SO=protein_coding_gene | is_pseudo=false	0	FALSE	23.283	18	10	10	10	776	83.5	9.23	4.78	10	1.084	0.12	0.998957	1.93019e+06	2.09325e+06	13.18	1.26	2.11932e+06	1.75794e+06	2.0747e+06	2.11196e+06	390776	199634	784760	2.11196e+06	Peak Found	Peak Found	Peak Found	High	1	Methylthio [C732]
TGGT1_205340	transcript=TGGT1_205340-t26_1 | gene=TGGT1_205340 | organism=Toxoplasma_gondii_GT1 | gene_product=40S ribosomal protein S12 [Source:UniProtKB/TrEMBL;Acc:A0A125YN62] | transcript_product=ribosomal protein RPS12 | location=TGGT1_chrVIIa:1379775-1380954(+) | protein_length=142 | sequence_SO=chromosome | SO=protein_coding_gene | is_pseudo=false	0	FALSE	7.957	23	3	7	3	142	15.4	5.01	12.74	3	1.082	0.11	0.998957	1.6719e+06	1.80966e+06	10.28	7.07	1.79822e+06	1.55445e+06	1.7214e+06	1.90245e+06	331569	176525	651124	1.90245e+06	High	High	High	High	1	Methylthio [C102]
TGGT1_211460	transcript=TGGT1_211460-t26_1 | gene=TGGT1_211460 | organism=Toxoplasma_gondii_GT1 | gene_product=hypothetical protein | transcript_product=hypothetical protein | location=TGGT1_chrIV:1626832-1629780(+) | protein_length=982 | sequence_SO=chromosome | SO=protein_coding_gene | is_pseudo=false	0.002	FALSE	3.88	3	2	2	2	982	105.6	5.26	0	2	1.081	0.11	0.998957	176305	190503	36.25	23.29	229157	135642	161332	224949	42253.5	15403.7	61024.4	224949	Peak Found	Peak Found	Peak Found	High	1
TGGT1_222210	transcript=TGGT1_222210-t26_1 | gene=TGGT1_222210 | organism=Toxoplasma_gondii_GT1 | gene_product=PHB domain-containing protein [Source:UniProtKB/TrEMBL;Acc:S7VTY9] | transcript_product=SPFH domain / Band 7 family protein | location=TGGT1_chrII:939785-944615(-) | protein_length=440 | sequence_SO=chromosome | SO=protein_coding_gene | is_pseudo=false	0.003	FALSE	3.351	2	1	1	1	440	47.4	9.61	2.68	1	1.08	0.11	0.998957	358032	386800	NA	2.81	358032	NA	394561	379191	66016.3	NA	149244	379191	Peak Found	Not Found	Peak Found	High	1
TGGT1_219720	transcript=TGGT1_219720-t26_1 | gene=TGGT1_219720 | organism=Toxoplasma_gondii_GT1 | gene_product=Putative Ras-related protein Rab-5C [Source:UniProtKB/TrEMBL;Acc:S7V1U0] | transcript_product=putative Ras-related protein Rab-5C | location=TGGT1_chrXII:628976-629707(+) | protein_length=243 | sequence_SO=chromosome | SO=protein_coding_gene | is_pseudo=false	0.003	FALSE	3.237	5	1	2	1	243	25.7	7.97	4.7	1	1.078	0.11	0.998957	950163	1.02432e+06	10.29	4.29	1.02204e+06	883338	993716	1.05587e+06	188451	100313	375876	1.05587e+06	Peak Found	Peak Found	High	High	1
TGGT1_261570	transcript=TGGT1_261570-t26_1 | gene=TGGT1_261570 | organism=Toxoplasma_gondii_GT1 | gene_product=60S ribosomal protein L7a [Source:UniProtKB/TrEMBL;Acc:A0A125YW74] | transcript_product=ribosomal protein RPL7A | location=TGGT1_chrVIIb:1628077-1630958(+) | protein_length=276 | sequence_SO=chromosome | SO=protein_coding_gene | is_pseudo=false	0	FALSE	18.2	23	6	14	6	276	31	10.45	19.7	6	1.078	0.11	0.998957	9.50977e+06	1.02539e+07	17.87	6.31	1.07977e+07	8.37547e+06	9.80622e+06	1.0722e+07	1.99095e+06	951128	3.70923e+06	1.0722e+07	High	High	High	High	1	Methylthio [C226]
TGGT1_203135	transcript=TGGT1_203135-t26_1 | gene=TGGT1_203135 | organism=Toxoplasma_gondii_GT1 | gene_product=Dynein heavy chain family protein [Source:UniProtKB/TrEMBL;Acc:S7UUU8] | transcript_product=dynein heavy chain family protein | location=TGGT1_chrVIIa:2644696-2697652(-) | protein_length=4551 | sequence_SO=chromosome | SO=protein_coding_gene | is_pseudo=false	0.037	FALSE	1.507	0	1	1	1	4551	518.7	5.68	0	1	1.076	0.11	0.998957	128720	138472	17	5.86	114075	145244	144336	132846	21034	16494.1	54595.6	132846	Peak Found	High	Peak Found	Peak Found	1
TGGT1_215460	transcript=TGGT1_215460-t26_1 | gene=TGGT1_215460 | organism=Toxoplasma_gondii_GT1 | gene_product=40S ribosomal protein S24 [Source:UniProtKB/TrEMBL;Acc:S7UQS1] | transcript_product=ribosomal protein RPS24 | location=TGGT1_chrX:6863478-6865141(-) | protein_length=267 | sequence_SO=chromosome | SO=protein_coding_gene | is_pseudo=false	0	FALSE	9.281	9	2	6	2	267	30.4	11.08	5.09	2	1.075	0.1	0.998957	2.98857e+06	3.21357e+06	18.63	5.54	3.41205e+06	2.61765e+06	3.08995e+06	3.34214e+06	629138	297264	1.16878e+06	3.34214e+06	High	High	Peak Found	High	1
TGGT1_266060	transcript=TGGT1_266060-t26_1 | gene=TGGT1_266060 | organism=Toxoplasma_gondii_GT1 | gene_product=40S ribosomal protein SA [Source:UniProtKB/TrEMBL;Acc:A0A125YJG1] | transcript_product=ribosomal protein RPSA | location=TGGT1_chrIX:1148543-1150882(-) | protein_length=287 | sequence_SO=chromosome | SO=protein_coding_gene | is_pseudo=false	0	FALSE	12.439	21	4	7	4	287	31.5	5.31	14.33	4	1.074	0.1	0.998957	7.27018e+06	7.80876e+06	15.3	0.96	6.52178e+06	8.10447e+06	7.75592e+06	7.86196e+06	1.20253e+06	920353	2.93369e+06	7.86196e+06	High	High	High	High	1
TGGT1_304955	transcript=TGGT1_304955-t26_1 | gene=TGGT1_304955 | organism=Toxoplasma_gondii_GT1 | gene_product=PPM-type phosphatase domain-containing protein [Source:UniProtKB/TrEMBL;Acc:S7VWJ7] | transcript_product=serine/threonine specific protein phosphatase | location=TGGT1_chrIX:4886317-4901581(-) | protein_length=2883 | sequence_SO=chromosome | SO=protein_coding_gene | is_pseudo=false	0	FALSE	20.796	4	8	10	8	2883	303.5	9.6	10.22	8	1.073	0.1	0.998957	3.67893e+06	3.946e+06	7.92	8.51	3.4784e+06	3.89102e+06	3.71537e+06	4.19094e+06	641372	441869	1.40535e+06	4.19094e+06	High	Peak Found	High	High	1
TGGT1_203490	transcript=TGGT1_203490-t26_1 | gene=TGGT1_203490 | organism=Toxoplasma_gondii_GT1 | gene_product=GNL3L/Grn1 GTPase [Source:UniProtKB/TrEMBL;Acc:S7UUZ9] | transcript_product=GNL3L/Grn1 GTPase | location=TGGT1_chrVIIa:2373071-2378820(+) | protein_length=701 | sequence_SO=chromosome | SO=protein_coding_gene | is_pseudo=false	0.003	FALSE	2.838	2	1	1	1	701	76.2	9.6	2.65	1	1.072	0.1	0.998957	179977	192889	22.89	7.68	211900	152864	182686	203662	39071.5	17359.5	69101.6	203662	Peak Found	Peak Found	Peak Found	High	1
TGGT1_269885A	transcript=TGGT1_269885A-t26_1 | gene=TGGT1_269885A | organism=Toxoplasma_gondii_GT1 | gene_product=Rhoptry metalloprotease toxolysin TLN1 [Source:UniProtKB/TrEMBL;Acc:S7V3X7] | transcript_product=rhoptry metalloprotease toxolysin TLN1 | location=TGGT1_chrVIII:5561686-5568242(+) | protein_length=1291 | sequence_SO=chromosome | SO=protein_coding_gene | is_pseudo=false	0	FALSE	84.95	35	30	61	24	1291	142.2	6.92	66.19	30	1.066	0.09	0.998957	2.38485e+07	2.54297e+07	29.78	7.18	2.9532e+07	1.92587e+07	2.67562e+07	2.41689e+07	5.44531e+06	2.18704e+06	1.01206e+07	2.41689e+07	High	High	High	High	1	Methylthio [C101; C600]
TGGT1_207840	transcript=TGGT1_207840-t26_1 | gene=TGGT1_207840 | organism=Toxoplasma_gondii_GT1 | gene_product=Ribosomal protein RPS17 [Source:UniProtKB/TrEMBL;Acc:A0A125YWE7] | transcript_product=ribosomal protein RPS17 | location=TGGT1_chrIb:342658-344358(-) | protein_length=132 | sequence_SO=chromosome | SO=protein_coding_gene | is_pseudo=false	0	FALSE	16.593	60	6	9	6	132	15.2	10.7	12.14	6	1.065	0.09	0.998957	6.05277e+06	6.4472e+06	18.29	7.46	6.8933e+06	5.31473e+06	6.11549e+06	6796909	1.27103e+06	603547	2.3132e+06	6796909	Peak Found	Peak Found	High	High	1
TGGT1_261240	transcript=TGGT1_261240-t26_1 | gene=TGGT1_261240 | organism=Toxoplasma_gondii_GT1 | gene_product=Histone H3 [Source:UniProtKB/TrEMBL;Acc:A0A125YSM0] | transcript_product=histone H3 | location=TGGT1_chrVIIb:1780702-1781112(+) | protein_length=136 | sequence_SO=chromosome | SO=protein_coding_gene | is_pseudo=false	0	FALSE	16.33	42	4	14	4	136	15.4	11.27	24.11	4	1.065	0.09	0.998957	2.12517e+08	2.26394e+08	18.3	0.22	2.42046e+08	1.86591e+08	2.2675e+08	2.26039e+08	4.46301e+07	2.11895e+07	8.57689e+07	2.26039e+08	High	High	High	High	1	Methylthio [C111]
TGGT1_227360	transcript=TGGT1_227360-t26_1 | gene=TGGT1_227360 | organism=Toxoplasma_gondii_GT1 | gene_product=Ribosomal protein RPL3 [Source:UniProtKB/TrEMBL;Acc:A0A125YQV1] | transcript_product=ribosomal protein RPL3 | location=TGGT1_chrX:901297-903989(-) | protein_length=389 | sequence_SO=chromosome | SO=protein_coding_gene | is_pseudo=false	0	FALSE	19.925	24	7	14	7	389	44	10.3	11.07	7	1.064	0.09	0.998957	4.73344e+06	5.03721e+06	24.78	17.7	5.65023e+06	3.9654e+06	4.44181e+06	5.71241e+06	1.04183e+06	450316	1.68013e+06	5.71241e+06	High	High	High	High	1	Methylthio [C114; C250; C326; C330]
TGGT1_273090	transcript=TGGT1_273090-t26_1 | gene=TGGT1_273090 | organism=Toxoplasma_gondii_GT1 | gene_product=Cell division protein CDC48CY [Source:UniProtKB/TrEMBL;Acc:A0A125YX44] | transcript_product=cell division protein CDC48CY | location=TGGT1_chrVIII:3661986-3671254(-) | protein_length=811 | sequence_SO=chromosome | SO=protein_coding_gene | is_pseudo=false	0	FALSE	12.304	9	5	5	5	811	89.3	5.11	4.33	5	1.064	0.09	0.998957	628176	668573	22.8	1.2	533882	739123	674278	662917	98440.9	83935.7	255047	662917	Peak Found	Peak Found	Peak Found	High	1
TGGT1_288290	transcript=TGGT1_288290-t26_1 | gene=TGGT1_288290 | organism=Toxoplasma_gondii_GT1 | gene_product=hypothetical protein | transcript_product=hypothetical protein | location=TGGT1_chrIX:2250871-2252753(-) | protein_length=505 | sequence_SO=chromosome | SO=protein_coding_gene | is_pseudo=false	0.01	FALSE	2.356	2	1	1	1	505	54.9	8.81	0	1	1.064	0.09	0.998957	290236	308820	NA	0.81	290236	NA	310590	307059	53515.8	NA	117481	307059	Peak Found	Not Found	Peak Found	High	1
TGGT1_211040	transcript=TGGT1_211040-t26_1 | gene=TGGT1_211040 | organism=Toxoplasma_gondii_GT1 | gene_product=Protein transport protein Sec61 subunit beta [Source:UniProtKB/TrEMBL;Acc:A0A125YP58] | transcript_product=Sec61beta family protein | location=TGGT1_chrIV:1885778-1887505(+) | protein_length=99 | sequence_SO=chromosome | SO=protein_coding_gene | is_pseudo=false	0	FALSE	6.392	24	2	5	2	99	10.1	10.87	7.99	2	1.063	0.09	0.998957	2.06752e+06	2.19794e+06	20.49	1.14	1.7868e+06	2.39235e+06	2.21566e+06	2.18037e+06	329462	271679	838079	2.18037e+06	Peak Found	High	High	High	1
TGGT1_220240	transcript=TGGT1_220240-t26_1 | gene=TGGT1_220240 | organism=Toxoplasma_gondii_GT1 | gene_product=hypothetical protein | transcript_product=hypothetical protein | location=TGGT1_chrV:140178-141758(-) | protein_length=526 | sequence_SO=chromosome | SO=protein_coding_gene | is_pseudo=false	0	FALSE	13.185	14	5	6	5	526	54.1	9.86	8.85	5	1.062	0.09	0.998957	1.88305e+06	2.00016e+06	0.11	10.29	1.88449e+06	1.88162e+06	1.8596e+06	2.15134e+06	347475	213679	703398	2.15134e+06	Peak Found	Peak Found	High	High	1
TGGT1_207100	transcript=TGGT1_207100-t26_1 | gene=TGGT1_207100 | organism=Toxoplasma_gondii_GT1 | gene_product=hypothetical protein | transcript_product=hypothetical protein | location=TGGT1_chrX:7258184-7266769(-) | protein_length=1386 | sequence_SO=chromosome | SO=protein_coding_gene | is_pseudo=false	0.032	FALSE	1.684	2	1	1	1	1386	149.7	7.71	0	1	1.061	0.09	0.998957	229410	243445	NA	12.61	229410	NA	222633	266203	42300.1	NA	84211.4	266203	Peak Found	Not Found	Peak Found	High	1	Phospho [S1069]
TGGT1_209910	transcript=TGGT1_209910-t26_1 | gene=TGGT1_209910 | organism=Toxoplasma_gondii_GT1 | gene_product=Histone H2B [Source:UniProtKB/TrEMBL;Acc:A0A125YMF4] | transcript_product=histone H2Bv | location=TGGT1_chrIb:1562803-1563174(+) | protein_length=123 | sequence_SO=chromosome | SO=protein_coding_gene | is_pseudo=false	0	FALSE	19.244	37	5	20	5	123	13.7	10.55	29.67	5	1.061	0.08	0.998957	8.46704e+07	8.98062e+07	18.65	8.75	9.66825e+07	7.41508e+07	8.4413e+07	9.5544e+07	1.7827e+07	8.42065e+06	3.19294e+07	9.5544e+07	High	High	High	High	1
TGGT1_266990	transcript=TGGT1_266990-t26_1 | gene=TGGT1_266990 | organism=Toxoplasma_gondii_GT1 | gene_product=Coatomer subunit beta [Source:UniProtKB/TrEMBL;Acc:S7UHC3] | transcript_product=beta-COP | location=TGGT1_chrIX:687782-698362(+) | protein_length=1103 | sequence_SO=chromosome | SO=protein_coding_gene | is_pseudo=false	0.001	FALSE	3.627	2	2	2	2	1103	121.9	6.61	0	2	1.061	0.09	0.998957	1.58147e+06	1.67807e+06	1.31	11.92	1.59617e+06	1.5669e+06	1.54212e+06	1.82601e+06	294313	177939	583312	1.82601e+06	Peak Found	Peak Found	Peak Found	High	1
TGGT1_274020	transcript=TGGT1_274020-t26_1 | gene=TGGT1_274020 | organism=Toxoplasma_gondii_GT1 | gene_product=Kinesin-like protein [Source:UniProtKB/TrEMBL;Acc:S7WJY7] | transcript_product=kinesin motor domain-containing protein | location=TGGT1_chrVIII:3073243-3078537(+) | protein_length=404 | sequence_SO=chromosome | SO=protein_coding_gene | is_pseudo=false	0.011	FALSE	2.327	3	1	1	1	404	45.5	8.75	1.61	1	1.061	0.09	0.998957	597276	633605	38.64	3.78	790530	451265	616894	650768	145763	51246.2	233342	650768	Peak Found	Peak Found	Peak Found	High	1
TGGT1_253440	transcript=TGGT1_253440-t26_1 | gene=TGGT1_253440 | organism=Toxoplasma_gondii_GT1 | gene_product=Protein kinase domain-containing protein [Source:UniProtKB/TrEMBL;Acc:S7UMJ9] | transcript_product=putative cell-cycle-associated protein kinase SRPK | location=TGGT1_chrIII:942676-953857(+) | protein_length=1763 | sequence_SO=chromosome | SO=protein_coding_gene | is_pseudo=false	0	FALSE	4.95	2	2	3	2	1763	187.3	5.72	1.71	2	1.06	0.08	0.998957	363724	385501	2.35	14.87	357725	369823	346889	428409	65959.9	41997.5	131212	428409	Peak Found	Peak Found	High	High	1
TGGT1_262010	transcript=TGGT1_262010-t26_1 | gene=TGGT1_262010 | organism=Toxoplasma_gondii_GT1 | gene_product=Calmodulin CAM2 [Source:UniProtKB/TrEMBL;Acc:A0A125YUD0] | transcript_product=calmodulin CAM2 | location=TGGT1_chrVIIb:1401611-1403836(+) | protein_length=142 | sequence_SO=chromosome | SO=protein_coding_gene | is_pseudo=false	0.011	FALSE	2.31	6	1	1	1	142	15.4	4.74	0	1	1.06	0.08	0.998957	94281.8	99941.5	NA	45.66	94281.8	NA	71504.8	139687	17384.3	NA	27046.9	139687	Peak Found	Not Found	Peak Found	High	1
TGGT1_216860	transcript=TGGT1_216860-t26_1 | gene=TGGT1_216860 | organism=Toxoplasma_gondii_GT1 | gene_product=DEAD (Asp-Glu-Ala-Asp) box polypeptide DDX39 [Source:UniProtKB/TrEMBL;Acc:A0A125YNR1] | transcript_product=DEAD (Asp-Glu-Ala-Asp) box polypeptide DDX39 | location=TGGT1_chrXI:5764687-5768776(+) | protein_length=434 | sequence_SO=chromosome | SO=protein_coding_gene | is_pseudo=false	0	FALSE	19.292	25	7	15	7	434	49.1	5.85	9.78	7	1.059	0.08	0.998957	1.8834e+06	1.99462e+06	16.91	5.29	2.12387e+06	1.67016e+06	1.92129e+06	2.07075e+06	391613	189665	726733	2.07075e+06	High	High	High	High	1	Methylthio [C318]
TGGT1_310450	transcript=TGGT1_310450-t26_1 | gene=TGGT1_310450 | organism=Toxoplasma_gondii_GT1 | gene_product=Putative myosin heavy chain [Source:UniProtKB/TrEMBL;Acc:S7UTE6] | transcript_product=putative myosin heavy chain | location=TGGT1_chrXI:1312630-1327285(+) | protein_length=1301 | sequence_SO=chromosome | SO=protein_coding_gene | is_pseudo=false	0.036	FALSE	1.538	1	1	1	1	1301	147.9	5.49	0	1	1.058	0.08	0.998957	87216.1	92260.7	NA	4.3	87216.1	NA	95106.7	89499.8	16081.5	NA	35974.4	89499.8	Peak Found	Not Found	Peak Found	High	1
TGGT1_310780	transcript=TGGT1_310780-t26_1 | gene=TGGT1_310780 | organism=Toxoplasma_gondii_GT1 | gene_product=Dense granule protein GRA4 [Source:UniProtKB/TrEMBL;Acc:S7UT91] | transcript_product=dense granule protein GRA4 | location=TGGT1_chrXI:1552761-1553798(-) | protein_length=345 | sequence_SO=chromosome | SO=protein_coding_gene | is_pseudo=false	0	FALSE	10.949	20	3	7	3	345	36.3	7.56	16.54	3	1.058	0.08	0.998957	4.2582e+06	4.50311e+06	8.26	0.97	4.5146e+06	4.01636e+06	4.47243e+06	4.53401e+06	832434	456102	1.69171e+06	4.53401e+06	High	High	High	High	1
TGGT1_229250A	transcript=TGGT1_229250A-t26_1 | gene=TGGT1_229250A | organism=Toxoplasma_gondii_GT1 | gene_product=Ribosomal_L28e domain-containing protein [Source:UniProtKB/TrEMBL;Acc:S7V393] | transcript_product=ribosomal protein RPL28 | location=TGGT1_chrVIII:108601-108824(-) | protein_length=74 | sequence_SO=chromosome | SO=protein_coding_gene | is_pseudo=false	0.003	FALSE	2.928	14	1	3	1	74	8.3	10.29	4.07	1	1.057	0.08	0.998957	926874	979957	10.27	2.3	861832	996825	995992	964179	158910	113201	376737	964179	High	Peak Found	High	High	1
TGGT1_213050	transcript=TGGT1_213050-t26_1 | gene=TGGT1_213050 | organism=Toxoplasma_gondii_GT1 | gene_product=hypothetical protein | transcript_product=hypothetical protein | location=TGGT1_chrV:689391-689969(+) | protein_length=192 | sequence_SO=chromosome | SO=protein_coding_gene | is_pseudo=false	0	FALSE	9.252	18	3	3	3	192	21.2	10.23	3.87	3	1.056	0.08	0.998957	709917	749931	36.07	0.6	546941	921456	746746	753130	100849	104642	282459	753130	Peak Found	Peak Found	Peak Found	High	1
TGGT1_251540	transcript=TGGT1_251540-t26_1 | gene=TGGT1_251540 | organism=Toxoplasma_gondii_GT1 | gene_product=Dense granule protein GRA9 [Source:UniProtKB/TrEMBL;Acc:A0A125YWK4] | transcript_product=dense granule protein GRA9 | location=TGGT1_chrXII:5372511-5374084(+) | protein_length=318 | sequence_SO=chromosome | SO=protein_coding_gene | is_pseudo=false	0	FALSE	26.858	37	9	17	9	318	35.3	5.39	21.18	9	1.056	0.08	0.998957	4.79643e+06	5.06379e+06	20.1	13.19	5.53422e+06	4.157e+06	4.61174e+06	5.56015e+06	1.02044e+06	472074	1.7444e+06	5.56015e+06	High	Peak Found	High	High	1	Methylthio [C138; C271]
TGGT1_291890	transcript=TGGT1_291890-t26_1 | gene=TGGT1_291890 | organism=Toxoplasma_gondii_GT1 | gene_product=TgMIC1 domain-containing protein [Source:UniProtKB/TrEMBL;Acc:S7VXI3] | transcript_product=microneme protein MIC1 | location=TGGT1_chrIX:4200849-4203191(-) | protein_length=456 | sequence_SO=chromosome | SO=protein_coding_gene | is_pseudo=false	0	FALSE	59.663	54	17	70	17	456	48.6	5.34	125.24	17	1.056	0.08	0.998957	8.47192e+07	8.94785e+07	0.93	3.95	8.52757e+07	8.41663e+07	8.70121e+07	9.20148e+07	1.57237e+07	9.55802e+06	3.29125e+07	9.20148e+07	High	High	High	High	1	Methylthio [C45; C53; C85; C103; C107; C113; C143; C236; C242; C252; C354]
TGGT1_319340	transcript=TGGT1_319340-t26_1 | gene=TGGT1_319340 | organism=Toxoplasma_gondii_GT1 | gene_product=hypothetical protein | transcript_product=hypothetical protein | location=TGGT1_chrIV:962742-964670(+) | protein_length=481 | sequence_SO=chromosome | SO=protein_coding_gene | is_pseudo=false	0	FALSE	4.546	6	2	2	2	481	52.4	5.87	0	2	1.056	0.08	0.998957	311811	329247	43.45	28.05	428318	226995	269290	402552	78976.2	25777.8	101860	402552	Peak Found	Peak Found	Peak Found	High	1
TGGT1_258130	transcript=TGGT1_258130-t26_1 | gene=TGGT1_258130 | organism=Toxoplasma_gondii_GT1 | gene_product=Rab1 protein [Source:UniProtKB/TrEMBL;Acc:S7WES0] | transcript_product=Rab1 protein | location=TGGT1_chrVIIb:3520118-3526101(+) | protein_length=216 | sequence_SO=chromosome | SO=protein_coding_gene | is_pseudo=false	0.003	FALSE	3.298	10	2	3	1	216	23.9	5.52	1.97	2	1.052	0.07	0.998957	1.63109e+06	1.71522e+06	8.22	4.09	1.53884e+06	1.72888e+06	1.66635e+06	1.76552e+06	283743	196333	630302	1.76552e+06	Peak Found	Peak Found	Peak Found	High	1
TGGT1_218520	transcript=TGGT1_218520-t26_1 | gene=TGGT1_218520 | organism=Toxoplasma_gondii_GT1 | gene_product=Microneme protein MIC6 [Source:UniProtKB/TrEMBL;Acc:S7V1D9] | transcript_product=microneme protein MIC6 | location=TGGT1_chrXII:1418869-1419918(-) | protein_length=349 | sequence_SO=chromosome | SO=protein_coding_gene | is_pseudo=false	0	FALSE	25.668	23	7	30	7	349	36.6	4.69	50.05	7	1.047	0.07	0.998957	1.6026e+07	1.67764e+07	17.68	1.89	1.41336e+07	1.81719e+07	1.70024e+07	1.65534e+07	2.60605e+06	2.06362e+06	6.43119e+06	1.65534e+07	High	High	High	High	1	Methylthio [C122; C140]
TGGT1_236870	transcript=TGGT1_236870-t26_1 | gene=TGGT1_236870 | organism=Toxoplasma_gondii_GT1 | gene_product=hypothetical protein | transcript_product=hypothetical protein | location=TGGT1_chrX:5454717-5455361(-) | protein_length=214 | sequence_SO=chromosome | SO=protein_coding_gene | is_pseudo=false	0	FALSE	5.091	9	2	2	2	214	23.8	7.68	1.9	2	1.045	0.06	0.998957	714336	746573	10.59	4.92	662700	769996	721048	773001	122193	87441.7	272738	773001	Peak Found	Peak Found	Peak Found	High	1
TGGT1_232230	transcript=TGGT1_232230-t26_1 | gene=TGGT1_232230 | organism=Toxoplasma_gondii_GT1 | gene_product=Ribosomal_L7Ae domain-containing protein [Source:UniProtKB/TrEMBL;Acc:A0A125YGX8] | transcript_product=ribosomal protein RPL30 | location=TGGT1_chrVIII:1959965-1961788(-) | protein_length=108 | sequence_SO=chromosome | SO=protein_coding_gene | is_pseudo=false	0.031	FALSE	1.7	15	1	1	1	108	11.7	9.33	0	1	1.044	0.06	0.998957	205190	214278	31.92	12.37	258164	163086	233924	196282	47602	18520.2	88482.3	196282	Peak Found	Peak Found	Peak Found	High	1	Methylthio [C92]
TGGT1_248390	transcript=TGGT1_248390-t26_1 | gene=TGGT1_248390 | organism=Toxoplasma_gondii_GT1 | gene_product=KOW domain-containing protein [Source:UniProtKB/TrEMBL;Acc:A0A125YI79] | transcript_product=ribosomal protein RPL26 | location=TGGT1_chrXII:3763041-3764059(-) | protein_length=141 | sequence_SO=chromosome | SO=protein_coding_gene | is_pseudo=false	0	FALSE	6.645	18	3	8	3	141	16.3	10.64	10.38	3	1.043	0.06	0.998957	4.51914e+06	4.71162e+06	13.74	3.25	4.98162e+06	4.0996e+06	4.60459e+06	4.82114e+06	918546	465556	1.7417e+06	4.82114e+06	High	High	High	High	1	Methylthio [C35]
TGGT1_306338B	transcript=TGGT1_306338B-t26_1 | gene=TGGT1_306338B | organism=Toxoplasma_gondii_GT1 | gene_product=Putative dynein gamma chain, flagellar outer arm [Source:UniProtKB/TrEMBL;Acc:S7UIB2] | transcript_product=putative dynein gamma chain, flagellar outer arm | location=TGGT1_chrIX:5753458-5781211(-) | protein_length=2699 | sequence_SO=chromosome | SO=protein_coding_gene | is_pseudo=false	0.033	FALSE	1.615	1	1	1	1	2699	306.7	6.74	0	1	1.042	0.06	0.998957	529120	551436	7.35	3.61	557384	502289	537543	565688	102774	57040.5	203327	565688	Peak Found	Peak Found	Peak Found	High	1	Phospho [T714]
TGGT1_206590	transcript=TGGT1_206590-t26_1 | gene=TGGT1_206590 | organism=Toxoplasma_gondii_GT1 | gene_product=Calcium-dependent protein kinase CDPK2A [Source:UniProtKB/TrEMBL;Acc:S7W2U0] | transcript_product=calcium-dependent protein kinase CDPK2A | location=TGGT1_chrVIIa:775466-782202(-) | protein_length=786 | sequence_SO=chromosome | SO=protein_coding_gene | is_pseudo=false	0	FALSE	12.204	9	6	6	6	786	86.3	8.76	3.45	6	1.041	0.06	0.998957	1.28058e+06	1.33345e+06	4.62	5.3	1.32309e+06	1.23943e+06	1.28434e+06	1.38444e+06	243960	140752	485804	1.38444e+06	Peak Found	Peak Found	High	High	1
TGGT1_309600	transcript=TGGT1_309600-t26_1 | gene=TGGT1_309600 | organism=Toxoplasma_gondii_GT1 | gene_product=hypothetical protein | transcript_product=hypothetical protein | location=TGGT1_chrXI:713110-720853(+) | protein_length=960 | sequence_SO=chromosome | SO=protein_coding_gene | is_pseudo=false	0	FALSE	39.149	22	15	21	15	960	106.5	9.67	15.57	15	1.041	0.06	0.998957	6.60626e+06	6.87436e+06	15.95	9.25	7.39852e+06	5.89883e+06	6.4383e+06	7.33996e+06	1.36419e+06	669878	2.4353e+06	7.33996e+06	High	High	High	High	1
TGGT1_230430	transcript=TGGT1_230430-t26_1 | gene=TGGT1_230430 | organism=Toxoplasma_gondii_GT1 | gene_product=Putative vesicle-associated membrane protein [Source:UniProtKB/TrEMBL;Acc:A0A125YLL6] | transcript_product=putative vesicle-associated membrane protein | location=TGGT1_chrVIII:775206-779637(+) | protein_length=221 | sequence_SO=chromosome | SO=protein_coding_gene | is_pseudo=false	0.003	FALSE	2.807	7	1	1	1	221	24.9	8.6	0	1	1.039	0.06	0.998957	169263	175863	11.04	6.34	183040	156524	183933	168147	33750.2	17775	69573	168147	Peak Found	Peak Found	Peak Found	High	1
TGGT1_310490	transcript=TGGT1_310490-t26_1 | gene=TGGT1_310490 | organism=Toxoplasma_gondii_GT1 | gene_product=Ribosomal_L18e/L15P domain-containing protein [Source:UniProtKB/TrEMBL;Acc:A0A125YTM1] | transcript_product=ribosomal protein RPL27A | location=TGGT1_chrXI:1345590-1346369(-) | protein_length=147 | sequence_SO=chromosome | SO=protein_coding_gene | is_pseudo=false	0	FALSE	4.675	14	2	4	2	147	16.3	10.45	1.84	2	1.038	0.05	0.998957	2.15543e+06	2.23773e+06	7.01	5	2.26497e+06	2.05118e+06	2.15989e+06	2.31837e+06	417631	232934	816985	2.31837e+06	High	High	High	High	1	Methylthio [C70]
TGGT1_258580	transcript=TGGT1_258580-t26_1 | gene=TGGT1_258580 | organism=Toxoplasma_gondii_GT1 | gene_product=Protein kinase domain-containing protein [Source:UniProtKB/TrEMBL;Acc:S7W7J7] | transcript_product=rhoptry protein ROP17 | location=TGGT1_chrVIIb:3287362-3289188(-) | protein_length=608 | sequence_SO=chromosome | SO=protein_coding_gene | is_pseudo=false	0	FALSE	55.875	39	16	45	16	608	69	9.57	67.89	16	1.037	0.05	0.998957	1.75568e+07	1.82027e+07	6.41	14.86	1.8371e+07	1.67786e+07	1.63809e+07	2.02272e+07	3.38738e+06	1.9054e+06	6.1961e+06	2.02272e+07	High	High	High	High	1	Methylthio [C544]
TGGT1_263040	transcript=TGGT1_263040-t26_1 | gene=TGGT1_263040 | organism=Toxoplasma_gondii_GT1 | gene_product=Ribosomal protein RPS16 [Source:UniProtKB/TrEMBL;Acc:S7UY71] | transcript_product=ribosomal protein RPS16 | location=TGGT1_chrVIIb:830975-832663(+) | protein_length=211 | sequence_SO=chromosome | SO=protein_coding_gene | is_pseudo=false	0	FALSE	13.7	22	4	12	4	211	24	10.89	16.82	4	1.037	0.05	0.998957	6.04737e+06	6.27211e+06	17.15	4.54	6.83104e+06	5.35361e+06	6.07383e+06	6.47686e+06	1.25955e+06	607963	2.29744e+06	6.47686e+06	High	High	High	High	1	Methylthio [C102]
TGGT1_248250	transcript=TGGT1_248250-t26_1 | gene=TGGT1_248250 | organism=Toxoplasma_gondii_GT1 | gene_product=Putative translation initiation factor IF-2 [Source:UniProtKB/TrEMBL;Acc:A0A125YKX3] | transcript_product=putative translation initiation factor IF-2 | location=TGGT1_chrXII:3694858-3697062(-) | protein_length=112 | sequence_SO=chromosome | SO=protein_coding_gene | is_pseudo=false	0.018	FALSE	1.915	6	1	1	1	112	12.6	8.29	0	1	1.036	0.05	0.998957	570215	590522	8.85	4.99	535579	607090	611731	570048	98753.7	68941.9	231389	570048	Peak Found	Peak Found	High	Peak Found	1
TGGT1_301120	transcript=TGGT1_301120-t26_1 | gene=TGGT1_301120 | organism=Toxoplasma_gondii_GT1 | gene_product=Acetyl-CoA acetyltransferase [Source:UniProtKB/TrEMBL;Acc:A0A125YTZ2] | transcript_product=acetyl-CoA acetyltransferase | location=TGGT1_chrIV:2160787-2165762(-) | protein_length=413 | sequence_SO=chromosome | SO=protein_coding_gene | is_pseudo=false	0	FALSE	11.327	15	5	5	5	413	43.9	8.27	3.57	5	1.035	0.05	0.998957	1.27289e+06	1.31712e+06	2.59	3.84	1.29644e+06	1.24976e+06	1.2818e+06	1.35342e+06	239047	141924	484844	1.35342e+06	Peak Found	Peak Found	High	High	1
TGGT1_286420A	transcript=TGGT1_286420A-t26_1 | gene=TGGT1_286420A | organism=Toxoplasma_gondii_GT1 | gene_product=Elongation factor 1-alpha [Source:UniProtKB/TrEMBL;Acc:S7W358] | transcript_product=putative elongation factor 1-alpha (EF-1-ALPHA) | location=TGGT1_chrV:1692242-1694172(-) | protein_length=448 | sequence_SO=chromosome | SO=protein_coding_gene | is_pseudo=false	0	FALSE	37.856	29	10	36	10	448	49.5	8.78	64.21	10	1.034	0.05	0.998957	8.39283e+07	8.6759e+07	11.19	6.8	7.75291e+07	9.08558e+07	8.26843e+07	9.10346e+07	1.42953e+07	1.03177e+07	3.12755e+07	9.10346e+07	High	High	High	High	1	Methylthio [C275; C323]
TGGT1_291960	transcript=TGGT1_291960-t26_1 | gene=TGGT1_291960 | organism=Toxoplasma_gondii_GT1 | gene_product=Kinase-like domain-containing protein [Source:UniProtKB/TrEMBL;Acc:S7UNX9] | transcript_product=rhoptry kinase family protein ROP40 (incomplete catalytic triad) | location=TGGT1_chrIX:4241532-4244563(+) | protein_length=525 | sequence_SO=chromosome | SO=protein_coding_gene | is_pseudo=false	0	FALSE	17.741	18	7	11	7	525	57.9	7.43	7.9	7	1.034	0.05	0.998957	2.98089e+06	3.08254e+06	7.9	1.61	3.15225e+06	2.81885e+06	3.04773e+06	3.11774e+06	581233	320112	1.15281e+06	3.11774e+06	High	Peak Found	High	High	1	Methylthio [C295]
TGGT1_307810	transcript=TGGT1_307810-t26_1 | gene=TGGT1_307810 | organism=Toxoplasma_gondii_GT1 | gene_product=hypothetical protein | transcript_product=hypothetical protein | location=TGGT1_chrXII:366832-371762(-) | protein_length=433 | sequence_SO=chromosome | SO=protein_coding_gene | is_pseudo=false	0	FALSE	5.886	6	2	3	2	433	45.2	9.52	3.73	2	1.033	0.05	0.998957	486222	502502	13.98	6.74	440322	536907	527034	479111	81189.6	60971.9	199352	479111	Peak Found	Peak Found	High	High	1
TGGT1_240390	transcript=TGGT1_240390-t26_1 | gene=TGGT1_240390 | organism=Toxoplasma_gondii_GT1 | gene_product=Calcium-dependent protein kinase [Source:UniProtKB/TrEMBL;Acc:S7US46] | transcript_product=calcium-dependent protein kinase | location=TGGT1_chrVI:1215401-1225146(-) | protein_length=2228 | sequence_SO=chromosome | SO=protein_coding_gene | is_pseudo=false	0.041	FALSE	1.469	0	1	1	1	2228	241.2	6.32	0	1	1.03	0.04	0.998957	995686	1.02546e+06	22.92	23.05	1.17259e+06	845467	869926	1.20879e+06	216211	96012.3	329052	1.20879e+06	Peak Found	Peak Found	Peak Found	High	1
TGGT1_269180	transcript=TGGT1_269180-t26_1 | gene=TGGT1_269180 | organism=Toxoplasma_gondii_GT1 | gene_product=MIF4G domain-containing protein [Source:UniProtKB/TrEMBL;Acc:S7WKZ1] | transcript_product=MIF4G domain-containing protein | location=TGGT1_chrVIII:6008955-6021323(-) | protein_length=2668 | sequence_SO=chromosome | SO=protein_coding_gene | is_pseudo=false	0	FALSE	41.897	9	17	18	17	2668	272.9	9.25	7.13	17	1.03	0.04	0.998957	4.09771e+06	4.22207e+06	14.43	3.52	4.5395e+06	3.69891e+06	4.11835e+06	4.32839e+06	837024	420053	1.55778e+06	4.32839e+06	Peak Found	High	High	High	1
TGGT1_311290	transcript=TGGT1_311290-t26_1 | gene=TGGT1_311290 | organism=Toxoplasma_gondii_GT1 | gene_product=Protein tyrosine phosphatase family protein, ptpla protein [Source:UniProtKB/TrEMBL;Acc:A0A125YHT1] | transcript_product=protein tyrosine phosphatase family protein, ptpla protein | location=TGGT1_chrXI:1911350-1913933(-) | protein_length=274 | sequence_SO=chromosome | SO=protein_coding_gene | is_pse…	0.004	FALSE	2.769	4	1	1	1	274	30.5	8.85	0	1	1.03	0.04	0.998957	285613	294100	8.45	2.62	269023	303227	299602	288698	49604.3	34434.8	113325	288698	High	Peak Found	Peak Found	Peak Found	1
TGGT1_205500	transcript=TGGT1_205500-t26_1 | gene=TGGT1_205500 | organism=Toxoplasma_gondii_GT1 | gene_product=hypothetical protein | transcript_product=hypothetical protein | location=TGGT1_chrVIIa:1278562-1285671(+) | protein_length=1009 | sequence_SO=chromosome | SO=protein_coding_gene | is_pseudo=false	0.032	FALSE	1.687	1	1	1	1	1009	113.3	4.88	0	1	1.026	0.04	0.998957	91770.9	94135.7	66.23	10.35	152503	55224.5	87482.3	101295	28119.5	6271.36	33090.4	101295	Peak Found	Peak Found	Peak Found	High	1
TGGT1_309760	transcript=TGGT1_309760-t26_1 | gene=TGGT1_309760 | organism=Toxoplasma_gondii_GT1 | gene_product=hypothetical protein | transcript_product=hypothetical protein | location=TGGT1_chrXI:754191-755138(-) | protein_length=315 | sequence_SO=chromosome | SO=protein_coding_gene | is_pseudo=false	0	FALSE	10.908	17	4	7	4	315	34.5	9.64	4.34	4	1.026	0.04	0.998957	933604	957659	21.99	42.69	1.09203e+06	798158	701266	1.30779e+06	201357	90639.8	265256	1.30779e+06	High	Peak Found	High	High	1	Methylthio [C210]
TGGT1_234450	transcript=TGGT1_234450-t26_1 | gene=TGGT1_234450 | organism=Toxoplasma_gondii_GT1 | gene_product=Ribosomal protein RPS15A [Source:UniProtKB/TrEMBL;Acc:S7UWC7] | transcript_product=ribosomal protein RPS15A | location=TGGT1_chrX:4292801-4294683(+) | protein_length=231 | sequence_SO=chromosome | SO=protein_coding_gene | is_pseudo=false	0	FALSE	11.158	19	5	8	5	231	26.6	9.67	4.51	5	1.024	0.03	0.998957	6.75842e+06	6.91828e+06	13.37	2.72	7.43088e+06	6.14682e+06	6.78638e+06	7.05276e+06	1.37016e+06	698040	2.56696e+06	7.05276e+06	Peak Found	Peak Found	High	High	1	Methylthio [C111; C141]
TGGT1_262050	transcript=TGGT1_262050-t26_1 | gene=TGGT1_262050 | organism=Toxoplasma_gondii_GT1 | gene_product=Protein kinase domain-containing protein [Source:UniProtKB/TrEMBL;Acc:S7UY96] | transcript_product=rhoptry kinase family protein ROP39 | location=TGGT1_chrVIIb:1382528-1384294(+) | protein_length=588 | sequence_SO=chromosome | SO=protein_coding_gene | is_pseudo=false	0	FALSE	30.05	24	11	19	11	588	65.1	8.76	20.52	11	1.022	0.03	0.998957	8.16246e+06	8.34103e+06	3.84	7.59	8.38702e+06	7.94392e+06	8.80153e+06	7.90462e+06	1.54646e+06	902121	3.3292e+06	7.90462e+06	High	High	High	High	1	Methylthio [C167; C525]
TGGT1_203780	transcript=TGGT1_203780-t26_1 | gene=TGGT1_203780 | organism=Toxoplasma_gondii_GT1 | gene_product=hypothetical protein | transcript_product=hypothetical protein | location=TGGT1_chrVIIa:2142786-2147213(+) | protein_length=1475 | sequence_SO=chromosome | SO=protein_coding_gene | is_pseudo=false	0.018	FALSE	1.922	1	1	1	1	1475	145.1	7.24	0	1	1.021	0.03	0.998957	52468.2	53574.3	NA	14.15	52468.2	NA	59229.9	48458.8	9674.45	NA	22403.9	48458.8	Peak Found	Not Found	Peak Found	High	1
TGGT1_266070	transcript=TGGT1_266070-t26_1 | gene=TGGT1_266070 | organism=Toxoplasma_gondii_GT1 | gene_product=Ribosomal protein RPL31 [Source:UniProtKB/TrEMBL;Acc:A0A125YYY2] | transcript_product=ribosomal protein RPL31 | location=TGGT1_chrIX:1142823-1144192(+) | protein_length=120 | sequence_SO=chromosome | SO=protein_coding_gene | is_pseudo=false	0	FALSE	5.789	21	2	4	2	120	14.3	10.68	7	2	1.021	0.03	0.998957	1.84098e+06	1.87943e+06	27.7	18.44	2.245e+06	1.50967e+06	1.64844e+06	2.14279e+06	413948	171440	623525	2.14279e+06	High	Peak Found	High	High	1
TGGT1_297880	transcript=TGGT1_297880-t26_1 | gene=TGGT1_297880 | organism=Toxoplasma_gondii_GT1 | gene_product=Dense granule protein DG32 [Source:UniProtKB/TrEMBL;Acc:A0A125YME3] | transcript_product=dense granule protein DG32 | location=TGGT1_chrII:2069382-2070384(-) | protein_length=219 | sequence_SO=chromosome | SO=protein_coding_gene | is_pseudo=false	0	FALSE	19.097	46	6	16	6	219	24.1	9.57	29.82	6	1.021	0.03	0.998957	4.15787e+06	4.24383e+06	20.62	7.01	4.81568e+06	3.58992e+06	4.03834e+06	4.45977e+06	887948	407676	1.52751e+06	4.45977e+06	High	High	High	High	1
TGGT1_210810	transcript=TGGT1_210810-t26_1 | gene=TGGT1_210810 | organism=Toxoplasma_gondii_GT1 | gene_product=hypothetical protein | transcript_product=hypothetical protein | location=TGGT1_chrIV:1968347-1970259(+) | protein_length=107 | sequence_SO=chromosome | SO=protein_coding_gene | is_pseudo=false	0.003	FALSE	3.138	9	1	1	1	107	11.9	5.5	1.69	1	1.019	0.03	0.998957	395176	402714	20.02	2.44	455695	342695	395836	409712	84024.2	38916.8	149726	409712	Peak Found	Peak Found	Peak Found	High	1
TGGT1_313010	transcript=TGGT1_313010-t26_1 | gene=TGGT1_313010 | organism=Toxoplasma_gondii_GT1 | gene_product=DEAD (Asp-Glu-Ala-Asp) box polypeptide DDX6 [Source:UniProtKB/TrEMBL;Acc:S7W8B2] | transcript_product=DEAD (Asp-Glu-Ala-Asp) box polypeptide DDX6 | location=TGGT1_chrXI:2995385-2998767(-) | protein_length=475 | sequence_SO=chromosome | SO=protein_coding_gene | is_pseudo=false	0	FALSE	19.275	23	7	13	7	475	53.4	8.44	12	7	1.019	0.03	0.998957	3.29518e+06	3.3591e+06	24.12	2.5	3.91446e+06	2.77388e+06	3.30031e+06	3.41894e+06	721774	315005	1.24835e+06	3.41894e+06	High	High	High	High	1
TGGT1_203310	transcript=TGGT1_203310-t26_1 | gene=TGGT1_203310 | organism=Toxoplasma_gondii_GT1 | gene_product=Dense granule protein GRA7 [Source:UniProtKB/TrEMBL;Acc:A0A125YVB8] | transcript_product=dense granule protein GRA7 | location=TGGT1_chrVIIa:2502941-2503651(+) | protein_length=236 | sequence_SO=chromosome | SO=protein_coding_gene | is_pseudo=false	0	FALSE	50.107	48	9	31	9	236	25.8	5.22	65.81	9	1.018	0.03	0.998957	1.87863e+07	1.91199e+07	18.47	0.83	1.64738e+07	2.14235e+07	1.92329e+07	1.90075e+07	3.03755e+06	2.43288e+06	7.2749e+06	1.90075e+07	High	High	High	High	1	Phospho [T90; T112]
TGGT1_258560	transcript=TGGT1_258560-t26_1 | gene=TGGT1_258560 | organism=Toxoplasma_gondii_GT1 | gene_product=hypothetical protein | transcript_product=hypothetical protein | location=TGGT1_chrVIIb:3299918-3304012(-) | protein_length=850 | sequence_SO=chromosome | SO=protein_coding_gene | is_pseudo=false	0.006	FALSE	2.481	1	1	4	1	850	96.8	8.63	6.12	1	1.017	0.02	0.998957	2.97849e+06	3.02788e+06	10.8	6.33	2.75909e+06	3.21533e+06	2.89528e+06	3.16656e+06	508740	365137	1.09515e+06	3.16656e+06	High	Peak Found	High	High	1
TGGT1_313130	transcript=TGGT1_313130-t26_1 | gene=TGGT1_313130 | organism=Toxoplasma_gondii_GT1 | gene_product=hypothetical protein | transcript_product=hypothetical protein | location=TGGT1_chrXI:3084517-3093785(+) | protein_length=1210 | sequence_SO=chromosome | SO=protein_coding_gene | is_pseudo=false	0.006	FALSE	2.494	1	1	1	1	1210	134.2	4.87	0	1	1.017	0.02	0.998957	100678	102351	NA	7.25	100678	NA	107743	97228.3	18563.7	NA	40754.1	97228.3	Peak Found	Not Found	Peak Found	High	1
TGGT1_221590	transcript=TGGT1_221590-t26_1 | gene=TGGT1_221590 | organism=Toxoplasma_gondii_GT1 | gene_product=Dual specificity phosphatase, catalytic domain-containing protein [Source:UniProtKB/TrEMBL;Acc:A0A125YN04] | transcript_product=dual specificity phosphatase, catalytic domain-containing protein | location=TGGT1_chrII:450572-453205(+) | protein_length=356 | sequence_SO=chromosome | SO=protein_coding_g…	0.009	FALSE	2.404	6	1	1	1	356	38.8	9.77	0	1	1.015	0.02	0.998957	83344.8	84629.2	5.39	28.95	86583.3	80227.5	68759	104162	15964.8	9110.73	26008.3	104162	Peak Found	Peak Found	Peak Found	High	1
TGGT1_245490	transcript=TGGT1_245490-t26_1 | gene=TGGT1_245490 | organism=Toxoplasma_gondii_GT1 | gene_product=Microneme protein MIC8 [Source:UniProtKB/TrEMBL;Acc:A0A125YJZ7] | transcript_product=microneme protein MIC8 | location=TGGT1_chrXII:2242495-2244549(+) | protein_length=684 | sequence_SO=chromosome | SO=protein_coding_gene | is_pseudo=false	0	FALSE	13.987	11	6	9	6	684	74.5	5.43	7.49	6	1.015	0.02	0.998957	4.47318e+06	4.54176e+06	8.67	2.18	4.75637e+06	4.20685e+06	4.61231e+06	4.4723e+06	877012	477735	1.74462e+06	4.4723e+06	Peak Found	High	High	High	1	Methylthio [C136; C142; C172; C177; C182; C307; C312]
TGGT1_251770	transcript=TGGT1_251770-t26_1 | gene=TGGT1_251770 | organism=Toxoplasma_gondii_GT1 | gene_product=hypothetical protein | transcript_product=hypothetical protein | location=TGGT1_chrXII:5493972-5500465(-) | protein_length=1265 | sequence_SO=chromosome | SO=protein_coding_gene | is_pseudo=false	0	FALSE	14.799	9	7	7	7	1265	138.2	8.27	2.09	7	1.014	0.02	0.998957	5.73631e+06	5.81885e+06	11.95	8.95	5.27038e+06	6.24344e+06	5.46163e+06	6.19944e+06	971788	709012	2.06588e+06	6.19944e+06	High	High	Peak Found	High	1
TGGT1_272010	transcript=TGGT1_272010-t26_1 | gene=TGGT1_272010 | organism=Toxoplasma_gondii_GT1 | gene_product=H/ACA ribonucleoprotein complex subunit [Source:UniProtKB/TrEMBL;Acc:A0A125YY65] | transcript_product=Gar1 protein RNA binding region protein | location=TGGT1_chrVIII:4215545-4219041(+) | protein_length=210 | sequence_SO=chromosome | SO=protein_coding_gene | is_pseudo=false	0.003	FALSE	3.372	6	1	1	1	210	20.9	11.47	0	1	1.014	0.02	0.998957	300555	304673	NA	3.52	300555	NA	297190	312345	55418.3	NA	112413	312345	Peak Found	Not Found	Peak Found	High	1	Methylthio [C126]
TGGT1_244110	transcript=TGGT1_244110-t26_1 | gene=TGGT1_244110 | organism=Toxoplasma_gondii_GT1 | gene_product=Nucleosome assembly protein (Nap) protein [Source:UniProtKB/TrEMBL;Acc:S7UG11] | transcript_product=nucleosome assembly protein (nap) protein | location=TGGT1_chrVI:2942300-2948890(+) | protein_length=738 | sequence_SO=chromosome | SO=protein_coding_gene | is_pseudo=false	0.002	FALSE	3.949	2	2	2	2	738	83.9	8.6	0	2	1.013	0.02	0.998957	171596	173785	4.9	6.76	165746	177652	165665	182303	30561.4	20174.4	62663.3	182303	Peak Found	Peak Found	Peak Found	High	1
TGGT1_282055	transcript=TGGT1_282055-t26_1 | gene=TGGT1_282055 | organism=Toxoplasma_gondii_GT1 | gene_product=PPM-type phosphatase domain-containing protein [Source:UniProtKB/TrEMBL;Acc:S7UW79] | transcript_product=protein phosphatase PP2C-hn | location=TGGT1_chrVIIa:4262456-4267234(-) | protein_length=478 | sequence_SO=chromosome | SO=protein_coding_gene | is_pseudo=false	0	FALSE	21.32	23	8	15	8	478	51.9	8.68	17.02	8	1.013	0.02	0.998957	6.53814e+06	6.62016e+06	2.53	6.61	6.42242e+06	6.65595e+06	6.93706e+06	6.31775e+06	1.18421e+06	755858	2.62396e+06	6.31775e+06	High	High	High	High	1	Methylthio [C123]
TGGT1_269885B	transcript=TGGT1_269885B-t26_1 | gene=TGGT1_269885B | organism=Toxoplasma_gondii_GT1 | gene_product=Rhoptry metalloprotease toxolysin TLN1 [Source:UniProtKB/TrEMBL;Acc:S7V463] | transcript_product=rhoptry metalloprotease toxolysin TLN1 | location=TGGT1_chrVIII:5568343-5570523(+) | protein_length=558 | sequence_SO=chromosome | SO=protein_coding_gene | is_pseudo=false	0	FALSE	44.864	38	17	32	11	558	62.3	7.96	29.69	17	1.012	0.02	0.998957	1.50862e+07	1.52695e+07	11.95	13.76	1.38612e+07	1.64193e+07	1.68355e+07	1.38492e+07	2.55583e+06	1.8646e+06	6.36808e+06	1.38492e+07	High	High	High	High	1	Methylthio [C245; C250; C289; C294; C298]
TGGT1_244560	transcript=TGGT1_244560-t26_1 | gene=TGGT1_244560 | organism=Toxoplasma_gondii_GT1 | gene_product=HATPase_c domain-containing protein [Source:UniProtKB/TrEMBL;Acc:S7VTT7] | transcript_product=putative heat shock protein 90 | location=TGGT1_chrVI:3273039-3276701(+) | protein_length=853 | sequence_SO=chromosome | SO=protein_coding_gene | is_pseudo=false	0	FALSE	12.305	6	5	6	5	853	97.5	5.03	1.81	5	1.009	0.01	0.998957	990767	999655	2.8	4.45	971334	1.01059e+06	968650	1.03165e+06	179101	114764	366394	1.03165e+06	Peak Found	Peak Found	High	High	1
TGGT1_203630	transcript=TGGT1_203630-t26_1 | gene=TGGT1_203630 | organism=Toxoplasma_gondii_GT1 | gene_product=Ribosomal protein RPL44 [Source:UniProtKB/TrEMBL;Acc:A0A125YNY0] | transcript_product=ribosomal protein RPL44 | location=TGGT1_chrVIIa:2292915-2293974(-) | protein_length=105 | sequence_SO=chromosome | SO=protein_coding_gene | is_pseudo=false	0.001	FALSE	3.583	15	2	2	2	105	12.1	10.56	1.64	2	1.008	0.01	0.998957	1.7027e+06	1.7156e+06	7.77	3.54	1.79893e+06	1.61163e+06	1.75905e+06	1.67323e+06	331699	183018	665364	1.67323e+06	Peak Found	High	Peak Found	High	1
TGGT1_248880	transcript=TGGT1_248880-t26_1 | gene=TGGT1_248880 | organism=Toxoplasma_gondii_GT1 | gene_product=GTPase RAB7 [Source:UniProtKB/TrEMBL;Acc:S7V0V9] | transcript_product=GTPase RAB7 | location=TGGT1_chrXII:4169929-4175109(-) | protein_length=432 | sequence_SO=chromosome | SO=protein_coding_gene | is_pseudo=false	0	FALSE	10.133	9	4	9	4	432	47.8	9.67	15.38	4	1.008	0.01	0.998957	4.40982e+06	4.44545e+06	2.34	7.08	4.48353e+06	4.33732e+06	4.22817e+06	4.67389e+06	826705	492551	1.59932e+06	4.67389e+06	High	High	High	High	1
TGGT1_313390	transcript=TGGT1_313390-t26_1 | gene=TGGT1_313390 | organism=Toxoplasma_gondii_GT1 | gene_product=Ribosomal protein RPL6 [Source:UniProtKB/TrEMBL;Acc:S7UT72] | transcript_product=ribosomal protein RPL6 | location=TGGT1_chrXI:3299999-3300967(+) | protein_length=322 | sequence_SO=chromosome | SO=protein_coding_gene | is_pseudo=false	0	FALSE	13.548	19	6	8	6	322	36.3	10.78	5.1	6	1.005	0.01	0.998957	6.45795e+06	6.49099e+06	7.74	7.22	6.8218e+06	6.11352e+06	6.16784e+06	6.83106e+06	1.25785e+06	694258	2.333e+06	6.83106e+06	High	Peak Found	High	High	1
TGGT1_214790	transcript=TGGT1_214790-t26_1 | gene=TGGT1_214790 | organism=Toxoplasma_gondii_GT1 | gene_product=Glycoprotein [Source:UniProtKB/TrEMBL;Acc:A0A125YXQ6] | transcript_product=glycoprotein | location=TGGT1_chrX:6386376-6388397(+) | protein_length=283 | sequence_SO=chromosome | SO=protein_coding_gene | is_pseudo=false	0.044	FALSE	1.435	2	1	1	1	283	31.4	4.77	0	1	1.002	0	0.998957	328641	329289	29.73	0.99	265492	406810	331596	326998	48953.2	46197.9	125427	326998	Peak Found	Peak Found	Peak Found	High	1
TGGT1_202200	transcript=TGGT1_202200-t26_1 | gene=TGGT1_202200 | organism=Toxoplasma_gondii_GT1 | gene_product=hypothetical protein | transcript_product=hypothetical protein | location=TGGT1_chrVIIa:3420532-3424661(-) | protein_length=793 | sequence_SO=chromosome | SO=protein_coding_gene | is_pseudo=false	0	FALSE	17.637	15	7	10	7	793	87.1	8.13	6.78	7	0.999	0	0.998957	1.50155e+06	1.50001e+06	5.36	16.86	1.44567e+06	1.55959e+06	1.33068e+06	1.69089e+06	266563	177109	503333	1.69089e+06	Peak Found	Peak Found	High	High	1	Methylthio [C529; C696]
TGGT1_215980	transcript=TGGT1_215980-t26_1 | gene=TGGT1_215980 | organism=Toxoplasma_gondii_GT1 | gene_product=hypothetical protein | transcript_product=hypothetical protein | location=TGGT1_chrXI:6414554-6415186(+) | protein_length=210 | sequence_SO=chromosome | SO=protein_coding_gene | is_pseudo=false	0	FALSE	28.143	49	9	62	9	210	24.5	8.34	100.57	9	0.999	0	0.998957	1.3133e+08	1.31179e+08	24.77	5.68	1.56755e+08	1.10028e+08	1.26015e+08	1.36555e+08	2.89037e+07	1.2495e+07	4.76655e+07	1.36555e+08	High	High	High	High	1	Methylthio [C184]
TGGT1_217480	transcript=TGGT1_217480-t26_1 | gene=TGGT1_217480 | organism=Toxoplasma_gondii_GT1 | gene_product=hypothetical protein | transcript_product=hypothetical protein | location=TGGT1_chrXII:1806127-1813999(+) | protein_length=1589 | sequence_SO=chromosome | SO=protein_coding_gene | is_pseudo=false	0.032	FALSE	1.659	1	1	1	1	1589	174.6	8.63	0	1	0.998	0	0.998957	103859	103658	27.08	11.77	85555.1	126078	95360.3	112678	15775.2	14317.6	36070.3	112678	Peak Found	Peak Found	Peak Found	High	1
TGGT1_311030	transcript=TGGT1_311030-t26_1 | gene=TGGT1_311030 | organism=Toxoplasma_gondii_GT1 | gene_product=U3snoRNP10 domain-containing protein [Source:UniProtKB/TrEMBL;Acc:S7W237] | transcript_product=hypothetical protein | location=TGGT1_chrXI:1692933-1708438(-) | protein_length=3738 | sequence_SO=chromosome | SO=protein_coding_gene | is_pseudo=false	0	FALSE	9.895	2	5	5	5	3738	402.6	6.87	1.63	5	0.993	-0.01	0.998957	588823	584768	96.98	92.9	1.36369e+06	254245	266108	1.28502e+06	251447	28872.4	100656	1.28502e+06	Peak Found	Peak Found	Peak Found	High	1
TGGT1_318230	transcript=TGGT1_318230-t26_1 | gene=TGGT1_318230 | organism=Toxoplasma_gondii_GT1 | gene_product=Phosphoglycerate kinase [Source:UniProtKB/TrEMBL;Acc:S7VZ21] | transcript_product=phosphoglycerate kinase PGKI | location=TGGT1_chrIV:1413955-1416908(+) | protein_length=417 | sequence_SO=chromosome | SO=protein_coding_gene | is_pseudo=false	0.049	FALSE	1.397	2	1	1	1	417	44.6	6.99	0	1	0.993	-0.01	0.998957	221507	219914	2.67	18.58	217359	225735	192694	250978	40078.1	25634.7	72887.1	250978	Peak Found	Peak Found	Peak Found	High	1
TGGT1_411430	transcript=TGGT1_411430-t26_1 | gene=TGGT1_411430 | organism=Toxoplasma_gondii_GT1 | gene_product=Protein kinase domain-containing protein [Source:UniProtKB/TrEMBL;Acc:S7UG16] | transcript_product=rhoptry protein ROP5 | location=AAQM03000489:189-1624(+) | protein_length=461 | sequence_SO=contig | SO=protein_coding_gene | is_pseudo=false	0	FALSE	70.717	36	17	77	5	461	51.5	10.56	139.42	17	0.993	-0.01	0.998957	5.42332e+06	5.38794e+06	11.65	6.92	5.89019e+06	4.99345e+06	5.13053e+06	5.65826e+06	1.08607e+06	567062	1.94064e+06	5.65826e+06	High	High	High	High	1
TGGT1_226580	transcript=TGGT1_226580-t26_1 | gene=TGGT1_226580 | organism=Toxoplasma_gondii_GT1 | gene_product=hypothetical protein | transcript_product=hypothetical protein | location=TGGT1_chrX:1431734-1436682(-) | protein_length=380 | sequence_SO=chromosome | SO=protein_coding_gene | is_pseudo=false	0	FALSE	6.111	8	3	3	3	380	42.7	9.66	0	3	0.992	-0.01	0.998957	461050	457575	5.19	5.04	478300	444423	441555	474175	88192.2	50469.3	167019	474175	Peak Found	Peak Found	Peak Found	High	1
TGGT1_240090	transcript=TGGT1_240090-t26_1 | gene=TGGT1_240090 | organism=Toxoplasma_gondii_GT1 | gene_product=Protein kinase domain-containing protein [Source:UniProtKB/TrEMBL;Acc:S7UR61] | transcript_product=putative rhoptry kinase family protein ROP34 | location=TGGT1_chrVI:1050567-1052967(+) | protein_length=553 | sequence_SO=chromosome | SO=protein_coding_gene | is_pseudo=false	0.036	FALSE	1.502	2	1	1	1	553	61.6	6.74	0	1	0.992	-0.01	0.998957	231310	229353	15.37	13.15	257981	207396	208928	251775	47568.3	23552.2	79027.5	251775	High	Peak Found	Peak Found	Peak Found	1
TGGT1_260440	transcript=TGGT1_260440-t26_1 | gene=TGGT1_260440 | organism=Toxoplasma_gondii_GT1 | gene_product=NPL domain-containing protein [Source:UniProtKB/TrEMBL;Acc:S7UYY1] | transcript_product=nuclear factor NF3 | location=TGGT1_chrVIIb:2242975-2247472(-) | protein_length=312 | sequence_SO=chromosome | SO=protein_coding_gene | is_pseudo=false	0	FALSE	17.558	19	6	27	6	312	34.1	4.31	42.54	6	0.992	-0.01	0.998957	4.28931e+07	4.25416e+07	1.11	0.75	4.25591e+07	4.32298e+07	4.27665e+07	42317861	7.84734e+06	4.90923e+06	1.61765e+07	42317861	High	High	High	High	1	Methylthio [C54]
TGGT1_313400	transcript=TGGT1_313400-t26_1 | gene=TGGT1_313400 | organism=Toxoplasma_gondii_GT1 | gene_product=J domain-containing protein [Source:UniProtKB/TrEMBL;Acc:S7W1G5] | transcript_product=DnaJ domain-containing protein | location=TGGT1_chrXI:3303512-3308107(-) | protein_length=293 | sequence_SO=chromosome | SO=protein_coding_gene | is_pseudo=false	0	FALSE	6.174	11	2	2	2	293	31.9	9.2	0	2	0.991	-0.01	0.998957	256811	254626	18.72	5.96	224798	293383	244114	265590	41449.9	33317	92336.7	265590	Peak Found	Peak Found	High	High	1
TGGT1_203990	transcript=TGGT1_203990-t26_1 | gene=TGGT1_203990 | organism=Toxoplasma_gondii_GT1 | gene_product=Rhoptry protein ROP12 [Source:UniProtKB/TrEMBL;Acc:S7UUD9] | transcript_product=rhoptry protein ROP12 | location=TGGT1_chrVIIa:1957210-1959051(-) | protein_length=236 | sequence_SO=chromosome | SO=protein_coding_gene | is_pseudo=false	0.032	FALSE	1.688	3	1	1	1	236	25.4	4.61	0	1	0.989	-0.02	0.998957	202596	200446	2.95	4.93	198416	206863	207560	193576	36585.3	23491.7	78510.2	193576	Peak Found	Peak Found	Peak Found	High	1
TGGT1_205360	transcript=TGGT1_205360-t26_1 | gene=TGGT1_205360 | organism=Toxoplasma_gondii_GT1 | gene_product=hypothetical protein | transcript_product=hypothetical protein | location=TGGT1_chrVIIa:1355158-1371232(+) | protein_length=2607 | sequence_SO=chromosome | SO=protein_coding_gene | is_pseudo=false	0.003	FALSE	2.992	0	1	1	1	2607	293.1	7.2	1.98	1	0.989	-0.02	0.998957	426489	421834	25	NA	509930	356703	NA	421834	94024.3	40507.6	NA	421834	Peak Found	Peak Found	Not Found	High	1
TGGT1_299050	transcript=TGGT1_299050-t26_1 | gene=TGGT1_299050 | organism=Toxoplasma_gondii_GT1 | gene_product=Ribosomal protein RPL17 [Source:UniProtKB/TrEMBL;Acc:A0A125YQZ7] | transcript_product=ribosomal protein RPL17 | location=TGGT1_chrIII:2205438-2207707(-) | protein_length=195 | sequence_SO=chromosome | SO=protein_coding_gene | is_pseudo=false	0	FALSE	10.632	21	4	10	4	195	22.3	10.17	14.95	4	0.988	-0.02	0.998957	6.14509e+06	6.07019e+06	14.05	8.28	6.78897e+06	5.56227e+06	5.72457e+06	6.43667e+06	1.2518e+06	631658	2.16534e+06	6.43667e+06	High	High	High	High	1
TGGT1_254470	transcript=TGGT1_254470-t26_1 | gene=TGGT1_254470 | organism=Toxoplasma_gondii_GT1 | gene_product=hypothetical protein | transcript_product=hypothetical protein | location=TGGT1_chrIII:1739403-1743582(+) | protein_length=732 | sequence_SO=chromosome | SO=protein_coding_gene | is_pseudo=false	0	FALSE	7.267	6	3	4	3	732	80.4	5.27	0	3	0.987	-0.02	0.998957	553338	546255	22.79	17.28	470311	651023	483118	617644	86719.1	73931	182740	617644	Peak Found	Peak Found	High	High	1
TGGT1_229670	transcript=TGGT1_229670-t26_1 | gene=TGGT1_229670 | organism=Toxoplasma_gondii_GT1 | gene_product=Ribosomal protein RPS23 [Source:UniProtKB/TrEMBL;Acc:A0A125YRX1] | transcript_product=ribosomal protein RPS23 | location=TGGT1_chrVIII:368147-371053(+) | protein_length=143 | sequence_SO=chromosome | SO=protein_coding_gene | is_pseudo=false	0	FALSE	17.52	43	5	16	5	143	15.8	10.83	27.08	5	0.983	-0.03	0.998957	7.74976e+06	7.61482e+06	8.35	9.57	8.22184e+06	7.30478e+06	7.11573e+06	8.14891e+06	1.516e+06	829540	2.69154e+06	8.14891e+06	High	High	High	High	1
TGGT1_221390	transcript=TGGT1_221390-t26_1 | gene=TGGT1_221390 | organism=Toxoplasma_gondii_GT1 | gene_product=hypothetical protein | transcript_product=hypothetical protein | location=TGGT1_chrII:286177-292066(-) | protein_length=875 | sequence_SO=chromosome | SO=protein_coding_gene | is_pseudo=false	0.031	FALSE	1.697	1	1	1	1	875	96.4	5.25	0	1	0.982	-0.03	0.998957	856943	841904	20	0.45	743232	988051	844582	839234	137042	112204	319465	839234	High	Peak Found	Peak Found	Peak Found	1
TGGT1_204480	transcript=TGGT1_204480-t26_1 | gene=TGGT1_204480 | organism=Toxoplasma_gondii_GT1 | gene_product=Thioredoxin domain-containing protein [Source:UniProtKB/TrEMBL;Acc:S7WA21] | transcript_product=thioredoxin domain-containing protein | location=TGGT1_chrVIIa:1656821-1664723(-) | protein_length=659 | sequence_SO=chromosome | SO=protein_coding_gene | is_pseudo=false	0	FALSE	8.576	5	4	5	4	659	72.1	8.56	2.03	4	0.978	-0.03	0.998957	1.35373e+06	1.32405e+06	6.36	3.74	1.2942e+06	1.416e+06	1.35955e+06	1.28947e+06	238633	160803	514254	1.28947e+06	Peak Found	Peak Found	Peak Found	High	1	Methylthio [C530]
TGGT1_245680	transcript=TGGT1_245680-t26_1 | gene=TGGT1_245680 | organism=Toxoplasma_gondii_GT1 | gene_product=Ribosomal protein RPL21 [Source:UniProtKB/TrEMBL;Acc:S7WHD1] | transcript_product=ribosomal protein RPL21 | location=TGGT1_chrXII:2403148-2403621(+) | protein_length=157 | sequence_SO=chromosome | SO=protein_coding_gene | is_pseudo=false	0	FALSE	10.98	27	4	8	4	157	17.9	10.35	9.9	4	0.977	-0.03	0.998957	3.11031e+06	3.03791e+06	20.95	3.57	3.61097e+06	2.67907e+06	2.96223e+06	3.11553e+06	665815	304239	1.12047e+06	3.11553e+06	High	High	High	High	1	Methylthio [C44]
TGGT1_260380	transcript=TGGT1_260380-t26_1 | gene=TGGT1_260380 | organism=Toxoplasma_gondii_GT1 | gene_product=hypothetical protein | transcript_product=hypothetical protein | location=TGGT1_chrVIIb:2298896-2302761(-) | protein_length=1108 | sequence_SO=chromosome | SO=protein_coding_gene | is_pseudo=false	0.012	FALSE	2.24	1	1	6	1	1108	119.2	9.8	5.96	1	0.975	-0.04	0.998957	3.0433e+07	2.96764e+07	29.71	8.8	3.76671e+07	2.45881e+07	3.15849e+07	27883282	6945326	2792259	11947054	27883282	High	High	High	High	1
TGGT1_312570	transcript=TGGT1_312570-t26_1 | gene=TGGT1_312570 | organism=Toxoplasma_gondii_GT1 | gene_product=Mitogen-activated protein kinase [Source:UniProtKB/TrEMBL;Acc:S7UTD9] | transcript_product=CMGC kinase, MAPK family (ERK) MAPK-1 | location=TGGT1_chrXI:2750081-2756721(-) | protein_length=1298 | sequence_SO=chromosome | SO=protein_coding_gene | is_pseudo=false	0.008	FALSE	2.445	1	1	3	1	1298	136.1	7.02	1.94	1	0.969	-0.05	0.998957	7.82582e+06	7.57942e+06	9.62	29.56	7.31038e+06	8.37759e+06	9.37045e+06	6.13072e+06	1.34794e+06	951369	3.5444e+06	6.13072e+06	Peak Found	Peak Found	High	High	1	Methylthio [C253]
TGGT1_213610	transcript=TGGT1_213610-t26_1 | gene=TGGT1_213610 | organism=Toxoplasma_gondii_GT1 | gene_product=hypothetical protein | transcript_product=hypothetical protein | location=TGGT1_chrV:1039260-1044139(-) | protein_length=1015 | sequence_SO=chromosome | SO=protein_coding_gene | is_pseudo=false	0	FALSE	6.49	4	3	3	3	1015	111.2	4.81	0	3	0.968	-0.05	0.998957	340651	329738	5.58	7.99	327466	354366	311602	348930	60380.5	40242.2	117864	348930	High	Peak Found	Peak Found	High	1
TGGT1_225160	transcript=TGGT1_225160-t26_1 | gene=TGGT1_225160 | organism=Toxoplasma_gondii_GT1 | gene_product=hypothetical protein | transcript_product=hypothetical protein | location=TGGT1_chrX:2354594-2355799(+) | protein_length=401 | sequence_SO=chromosome | SO=protein_coding_gene | is_pseudo=false	0	FALSE	11.147	12	4	4	4	401	45.4	9.25	1.65	4	0.966	-0.05	0.998957	448434	433098	1.52	8.35	443641	453279	408236	459474	81801.7	51474.9	154416	459474	Peak Found	Peak Found	Peak Found	High	1
TGGT1_294200	transcript=TGGT1_294200-t26_1 | gene=TGGT1_294200 | organism=Toxoplasma_gondii_GT1 | gene_product=Glucose-6-phosphate 1-dehydrogenase [Source:UniProtKB/TrEMBL;Acc:A0A125YWK6] | transcript_product=glucose-6-phosphate 1-dehydrogenase | location=TGGT1_chrIa:683542-690397(+) | protein_length=560 | sequence_SO=chromosome | SO=protein_coding_gene | is_pseudo=false	0	FALSE	13.231	13	5	7	5	560	62.7	7.61	5.4	5	0.964	-0.05	0.998957	1.15425e+06	1.11243e+06	21.74	0.55	988558	1.34772e+06	1.10812e+06	1.11677e+06	182277	153049	419148	1.11677e+06	High	Peak Found	High	High	1
TGGT1_305190	transcript=TGGT1_305190-t26_1 | gene=TGGT1_305190 | organism=Toxoplasma_gondii_GT1 | gene_product=CorA family Mg2+ transporter protein [Source:UniProtKB/TrEMBL;Acc:S7UH40] | transcript_product=CorA family Mg2+ transporter protein | location=TGGT1_chrIX:5054885-5060316(-) | protein_length=837 | sequence_SO=chromosome | SO=protein_coding_gene | is_pseudo=false	0.051	FALSE	1.385	1	1	1	1	837	91.1	6.81	0	1	0.964	-0.05	0.998957	95583.1	92167.6	NA	4.83	95583.1	NA	95373.6	89069.3	17624.3	NA	36075.3	89069.3	Peak Found	Not Found	Peak Found	High	1
TGGT1_408800	transcript=TGGT1_408800-t26_1 | gene=TGGT1_408800 | organism=Toxoplasma_gondii_GT1 | gene_product=NTPase [Source:UniProtKB/TrEMBL;Acc:S7UZL9] | transcript_product=NTPase | location=TGGT1_chrXII:6592331-6592894(+) | protein_length=188 | sequence_SO=chromosome | SO=protein_coding_gene | is_pseudo=false	0	FALSE	7.734	20	3	4	1	188	20.9	6.92	2.25	3	0.956	-0.07	0.998957	240178	229502	3.46	2.74	234376	246124	225104	233986	43215.9	27950.1	85146.2	233986	Peak Found	Peak Found	Peak Found	High	1
TGGT1_240600	transcript=TGGT1_240600-t26_1 | gene=TGGT1_240600 | organism=Toxoplasma_gondii_GT1 | gene_product=Putative chaperonin cpn60 [Source:UniProtKB/TrEMBL;Acc:S7W6R0] | transcript_product=putative chaperonin cpn60 | location=TGGT1_chrVI:1306402-1309981(+) | protein_length=667 | sequence_SO=chromosome | SO=protein_coding_gene | is_pseudo=false	0	FALSE	6.098	5	3	3	3	667	72.2	5.68	1.78	3	0.952	-0.07	0.998957	2.02341e+06	1.92644e+06	24.88	65.64	1.69387e+06	2.41707e+06	3.1844e+06	1.16542e+06	312328	274485	1.20451e+06	1.16542e+06	Peak Found	Peak Found	High	High	1
TGGT1_410370	transcript=TGGT1_410370-t26_1 | gene=TGGT1_410370 | organism=Toxoplasma_gondii_GT1 | gene_product=Putative transmembrane protein [Source:UniProtKB/TrEMBL;Acc:S7VU98] | transcript_product=putative transmembrane protein | location=AAQM03000265:733-2584(+) | protein_length=435 | sequence_SO=contig | SO=protein_coding_gene | is_pseudo=false	0	FALSE	52.616	46	15	57	4	435	47.7	9.19	108.01	15	0.952	-0.07	0.998957	4.87493e+06	4.64104e+06	1.64	4.7	4.81879e+06	4.93173e+06	4.48929e+06	4.79792e+06	888521	560053	1.69809e+06	4.79792e+06	High	Peak Found	High	High	1
TGGT1_309170	transcript=TGGT1_309170-t26_1 | gene=TGGT1_309170 | organism=Toxoplasma_gondii_GT1 | gene_product=TAFII55_N domain-containing protein [Source:UniProtKB/TrEMBL;Acc:S7W133] | transcript_product=TAF7-like RNA polymerase II TAF7L | location=TGGT1_chrXI:496176-501689(-) | protein_length=728 | sequence_SO=chromosome | SO=protein_coding_gene | is_pseudo=false	0.033	FALSE	1.589	1	1	1	1	728	76.5	5.6	0	1	0.951	-0.07	0.998957	1.27315e+06	1.21023e+06	8.74	13.2	1.19678e+06	1.35439e+06	1.32895e+06	1.10211e+06	220671	153807	502679	1.10211e+06	Peak Found	Peak Found	Peak Found	High	1
TGGT1_269950	transcript=TGGT1_269950-t26_1 | gene=TGGT1_269950 | organism=Toxoplasma_gondii_GT1 | gene_product=Thioredoxin domain-containing protein [Source:UniProtKB/TrEMBL;Acc:S7V464] | transcript_product=hypothetical protein | location=TGGT1_chrVIII:5501073-5504592(-) | protein_length=944 | sequence_SO=chromosome | SO=protein_coding_gene | is_pseudo=false	0.013	FALSE	2.207	2	1	1	1	944	104.6	5.73	0	1	0.95	-0.07	0.998957	114079	108414	28.26	2.52	139696	93159.2	106497	110365	25758.2	10579.3	40282.8	110365	Peak Found	Peak Found	Peak Found	High	1
TGGT1_295125	transcript=TGGT1_295125-t26_1 | gene=TGGT1_295125 | organism=Toxoplasma_gondii_GT1 | gene_product=Protein kinase domain-containing protein [Source:UniProtKB/TrEMBL;Acc:S7UI50] | transcript_product=rhoptry protein ROP4 | location=TGGT1_chrIa:1394541-1396277(-) | protein_length=365 | sequence_SO=chromosome | SO=protein_coding_gene | is_pseudo=false	0	FALSE	27.589	25	8	17	3	365	40.1	5.3	15.96	8	0.95	-0.07	0.998957	2.18555e+06	2.07575e+06	1.65	3.18	2.16025e+06	2.21114e+06	2.12297e+06	2.02957e+06	398322	251100	803019	2.02957e+06	Peak Found	High	Peak Found	High	1
TGGT1_249840	transcript=TGGT1_249840-t26_1 | gene=TGGT1_249840 | organism=Toxoplasma_gondii_GT1 | gene_product=Putative dynein heavy chain 2 [Source:UniProtKB/TrEMBL;Acc:S7V0N4] | transcript_product=putative dynein heavy chain 2 | location=TGGT1_chrXII:4786016-4835663(+) | protein_length=4140 | sequence_SO=chromosome | SO=protein_coding_gene | is_pseudo=false	0.014	FALSE	1.985	0	1	1	1	4140	470.6	6.15	0	1	0.947	-0.08	0.998957	674631	638765	33.02	16.52	855799	531815	568038	718297	157798	60393.5	214862	718297	Peak Found	Peak Found	Peak Found	High	1
TGGT1_208850	transcript=TGGT1_208850-t26_1 | gene=TGGT1_208850 | organism=Toxoplasma_gondii_GT1 | gene_product=SAG domain-containing protein [Source:UniProtKB/TrEMBL;Acc:A0A125YN91] | transcript_product=SAG-related sequence SRS11 | location=TGGT1_chrIb:924676-925248(+) | protein_length=190 | sequence_SO=chromosome | SO=protein_coding_gene | is_pseudo=false	0.003	FALSE	2.989	9	1	1	1	190	19.5	7.91	0	1	0.946	-0.08	0.998957	217111	205411	NA	16.85	217111	NA	231536	182233	40032.5	NA	87579.2	182233	Peak Found	Not Found	Peak Found	High	1
TGGT1_258462	transcript=TGGT1_258462-t26_1 | gene=TGGT1_258462 | organism=Toxoplasma_gondii_GT1 | gene_product=hypothetical protein | transcript_product=hypothetical protein | location=TGGT1_chrVIIb:3372709-3373945(-) | protein_length=326 | sequence_SO=chromosome | SO=protein_coding_gene | is_pseudo=false	0.031	FALSE	1.71	3	1	1	1	326	36.5	9.06	0	1	0.945	-0.08	0.998957	240354	227056	12.2	3.1	262062	220445	222138	232084	48320.7	25034	84024.2	232084	Peak Found	Peak Found	Peak Found	High	1
TGGT1_204400	transcript=TGGT1_204400-t26_1 | gene=TGGT1_204400 | organism=Toxoplasma_gondii_GT1 | gene_product=ATP synthase subunit alpha [Source:UniProtKB/TrEMBL;Acc:S7UU80] | transcript_product=putative ATPase synthase subunit alpha | location=TGGT1_chrVIIa:1716199-1723634(+) | protein_length=577 | sequence_SO=chromosome | SO=protein_coding_gene | is_pseudo=false	0	FALSE	8.681	6	4	9	4	577	62.1	8.37	6.09	4	0.944	-0.08	0.998957	8.39733e+06	7.92368e+06	10.85	8.96	7.7759e+06	9.06841e+06	7.43635e+06	8.44295e+06	1.43377e+06	1.02982e+06	2.81282e+06	8.44295e+06	High	High	High	High	1
TGGT1_265410	transcript=TGGT1_265410-t26_1 | gene=TGGT1_265410 | organism=Toxoplasma_gondii_GT1 | gene_product=WD_REPEATS_REGION domain-containing protein [Source:UniProtKB/TrEMBL;Acc:S7UGX7] | transcript_product=G-protein beta WD-40 repeat containing protein | location=TGGT1_chrIX:1391452-1393275(+) | protein_length=607 | sequence_SO=chromosome | SO=protein_coding_gene | is_pseudo=false	0.037	FALSE	1.517	2	1	1	1	607	67.3	6.46	0	1	0.943	-0.08	0.998957	128374	121115	NA	3.52	128374	NA	124166	118138	23670.5	NA	46966.2	118138	Peak Found	Not Found	Peak Found	High	1
TGGT1_226250	transcript=TGGT1_226250-t26_1 | gene=TGGT1_226250 | organism=Toxoplasma_gondii_GT1 | gene_product=DEAD (Asp-Glu-Ala-Asp) box polypeptide DDX3X [Source:UniProtKB/TrEMBL;Acc:A0A125YSI6] | transcript_product=DEAD (Asp-Glu-Ala-Asp) box polypeptide DDX3X | location=TGGT1_chrX:1667417-1670378(+) | protein_length=734 | sequence_SO=chromosome | SO=protein_coding_gene | is_pseudo=false	0	FALSE	26.05	20	11	14	11	734	78.5	9.09	5.7	11	0.94	-0.09	0.998957	3.08933e+06	2.90304e+06	16.66	4.46	2.74441e+06	3.4776e+06	2.81285e+06	2.99613e+06	506032	394921	1.06397e+06	2.99613e+06	High	Peak Found	High	High	1	Methylthio [C273]
TGGT1_318460	transcript=TGGT1_318460-t26_1 | gene=TGGT1_318460 | organism=Toxoplasma_gondii_GT1 | gene_product=P-type ATPase of unknown pump specificity (type V) protein | transcript_product=P-type ATPase of unknown pump specificity (type V) protein | location=TGGT1_chrIV:1253650-1260940(-) | protein_length=1484 | sequence_SO=chromosome | SO=protein_coding_gene | is_pseudo=false	0.013	FALSE	2.125	1	1	3	1	1484	162.7	7.01	0	1	0.94	-0.09	0.998957	688083	646782	9.84	1.47	641780	737727	653532	640101	118336	83777.1	247200	640101	High	Peak Found	High	High	1
TGGT1_228170	transcript=TGGT1_228170-t26_1 | gene=TGGT1_228170 | organism=Toxoplasma_gondii_GT1 | gene_product=Metallophos domain-containing protein [Source:UniProtKB/TrEMBL;Acc:S7UX86] | transcript_product=inner membrane complex protein IMC2A | location=TGGT1_chrX:431147-436956(-) | protein_length=1596 | sequence_SO=chromosome | SO=protein_coding_gene | is_pseudo=false	0	FALSE	20.274	7	9	11	9	1596	182.2	5.94	1.65	9	0.939	-0.09	0.998957	1.23759e+06	1.16252e+06	0.16	0.62	1.23899e+06	1.23618e+06	1.16761e+06	1.15746e+06	228454	140382	441652	1.15746e+06	Peak Found	Peak Found	High	High	1
TGGT1_204340	transcript=TGGT1_204340-t26_1 | gene=TGGT1_204340 | organism=Toxoplasma_gondii_GT1 | gene_product=hypothetical protein | transcript_product=hypothetical protein | location=TGGT1_chrVIIa:1770608-1775101(-) | protein_length=877 | sequence_SO=chromosome | SO=protein_coding_gene | is_pseudo=false	0	FALSE	18.142	9	7	11	7	877	97.2	6.11	3.47	7	0.938	-0.09	0.998957	3.25951e+06	3.05655e+06	18.94	2.07	3.72956e+06	2.8487e+06	3.01207e+06	3.10169e+06	687682	323502	1.13932e+06	3.10169e+06	Peak Found	High	High	High	1	Methylthio [C408]
TGGT1_306500	transcript=TGGT1_306500-t26_1 | gene=TGGT1_306500 | organism=Toxoplasma_gondii_GT1 | gene_product=hypothetical protein | transcript_product=hypothetical protein | location=TGGT1_chrIX:5917937-5925448(+) | protein_length=1321 | sequence_SO=chromosome | SO=protein_coding_gene | is_pseudo=false	0.023	FALSE	1.861	2	1	2	1	1321	147.4	8.91	0	1	0.937	-0.09	0.998957	1.63669e+06	1.53394e+06	50.68	50.38	2.38128e+06	1.12492e+06	1.0568e+06	2.22649e+06	439077	127747	399738	2.22649e+06	High	High	Peak Found	Peak Found	1
TGGT1_224280	transcript=TGGT1_224280-t26_1 | gene=TGGT1_224280 | organism=Toxoplasma_gondii_GT1 | gene_product=CPSF_A domain-containing protein [Source:UniProtKB/TrEMBL;Acc:S7UW31] | transcript_product=CPSF A subunit region protein | location=TGGT1_chrX:3022834-3039025(-) | protein_length=2847 | sequence_SO=chromosome | SO=protein_coding_gene | is_pseudo=false	0.03	FALSE	1.765	0	1	1	1	2847	301.6	5.45	0	1	0.936	-0.1	0.998957	330111	308979	13.42	5.19	300149	363064	297836	320538	55343.6	41229.9	112657	320538	High	Peak Found	Peak Found	Peak Found	1
TGGT1_252290	transcript=TGGT1_252290-t26_1 | gene=TGGT1_252290 | organism=Toxoplasma_gondii_GT1 | gene_product=Importin subunit alpha [Source:UniProtKB/TrEMBL;Acc:A0A125YIC7] | transcript_product=putative importin alpha | location=TGGT1_chrIII:450884-460151(+) | protein_length=545 | sequence_SO=chromosome | SO=protein_coding_gene | is_pseudo=false	0	FALSE	21.013	16	8	17	8	545	59.3	4.94	15.59	8	0.935	-0.1	0.998957	4.86697e+06	4.55203e+06	20.84	2.87	4.19568e+06	5.64567e+06	4.64543e+06	4.46051e+06	773628	641129	1.75715e+06	4.46051e+06	High	High	High	High	1	Methylthio [C204; C360]
TGGT1_288380	transcript=TGGT1_288380-t26_1 | gene=TGGT1_288380 | organism=Toxoplasma_gondii_GT1 | gene_product=HATPase_c domain-containing protein [Source:UniProtKB/TrEMBL;Acc:A0A125YVB6] | transcript_product=heat shock protein HSP90 | location=TGGT1_chrIX:2294323-2298742(+) | protein_length=708 | sequence_SO=chromosome | SO=protein_coding_gene | is_pseudo=false	0	FALSE	15.152	6	4	9	4	708	81.9	5.03	8.24	4	0.933	-0.1	0.998957	4.31194e+06	4.02328e+06	8.76	9.11	4.58777e+06	4.0527e+06	3.77198e+06	4.29133e+06	845924	460229	1.42676e+06	4.29133e+06	High	Peak Found	High	High	1
TGGT1_218720	transcript=TGGT1_218720-t26_1 | gene=TGGT1_218720 | organism=Toxoplasma_gondii_GT1 | gene_product=Calcium-dependent protein kinase CDPK6 [Source:UniProtKB/TrEMBL;Acc:S7V1C9] | transcript_product=calcium-dependent protein kinase CDPK6 | location=TGGT1_chrXII:1292458-1303855(+) | protein_length=1477 | sequence_SO=chromosome | SO=protein_coding_gene | is_pseudo=false	0	FALSE	6.548	2	3	3	3	1477	160.6	8.76	3.79	3	0.932	-0.1	0.998957	657176	612787	29.66	21.7	813109	531146	524966	715300	149927	60317.6	198570	715300	Peak Found	Peak Found	Peak Found	High	1
TGGT1_261250	transcript=TGGT1_261250-t26_1 | gene=TGGT1_261250 | organism=Toxoplasma_gondii_GT1 | gene_product=Histone H2A [Source:UniProtKB/TrEMBL;Acc:S7UYT4] | transcript_product=histone H2A1 | location=TGGT1_chrVIIb:1779724-1780266(-) | protein_length=180 | sequence_SO=chromosome | SO=protein_coding_gene | is_pseudo=false	0	FALSE	23.324	42	4	34	2	180	19.5	10.2	84.89	4	0.932	-0.1	0.998957	8.69699e+07	8.10538e+07	47.28	5.22	1.23133e+08	6.14273e+07	8.41007e+07	7.81172e+07	2.27042e+07	6.97576e+06	3.18113e+07	7.81172e+07	High	High	High	High	1	Methylthio [C113]
TGGT1_243570	transcript=TGGT1_243570-t26_1 | gene=TGGT1_243570 | organism=Toxoplasma_gondii_GT1 | gene_product=40S ribosomal protein S26 [Source:UniProtKB/TrEMBL;Acc:A0A125YVY8] | transcript_product=ribosomal protein RPS26 | location=TGGT1_chrVI:2643618-2644858(-) | protein_length=112 | sequence_SO=chromosome | SO=protein_coding_gene | is_pseudo=false	0.013	FALSE	2.155	8	1	1	1	112	12.7	10.92	2.55	1	0.931	-0.1	0.998957	2.50818e+06	2.33504e+06	2.72	1.08	2.46035e+06	2.55694e+06	2.35302e+06	2.31721e+06	453656	290369	890036	2.31721e+06	Peak Found	Peak Found	High	Peak Found	1
TGGT1_271888	transcript=TGGT1_271888-t26_1 | gene=TGGT1_271888 | organism=Toxoplasma_gondii_GT1 | gene_product=Putative 3-ketoacyl-CoA reductase [Source:UniProtKB/TrEMBL;Acc:A0A125YR36] | transcript_product=putative 3-ketoacyl-CoA reductase | location=TGGT1_chrVIII:4294988-4299861(-) | protein_length=342 | sequence_SO=chromosome | SO=protein_coding_gene | is_pseudo=false	0	FALSE	15.768	17	5	12	5	342	37.5	9.26	6.75	5	0.93	-0.1	0.998957	2.57879e+06	2.3993e+06	2.95	7.03	2.52552e+06	2.63319e+06	2.5217e+06	2.28283e+06	465673	299028	953840	2.28283e+06	High	High	High	High	1	Methylthio [C247]
TGGT1_285850	transcript=TGGT1_285850-t26_1 | gene=TGGT1_285850 | organism=Toxoplasma_gondii_GT1 | gene_product=Peptidylprolyl isomerase [Source:UniProtKB/TrEMBL;Acc:S7W319] | transcript_product=peptidyl-prolyl cis-trans isomerase, FKBP-type domain-containing protein | location=TGGT1_chrV:2026917-2028990(-) | protein_length=428 | sequence_SO=chromosome | SO=protein_coding_gene | is_pseudo=false	0	FALSE	8.792	11	3	7	3	428	46	8.72	9.16	3	0.928	-0.11	0.998957	1.38356e+06	1.28347e+06	11.68	0.55	1.50297e+06	1.27363e+06	1.2785e+06	1.28846e+06	277129	144635	483595	1.28846e+06	High	Peak Found	High	High	1	Methylthio [C328]
TGGT1_295110	transcript=TGGT1_295110-t26_1 | gene=TGGT1_295110 | organism=Toxoplasma_gondii_GT1 | gene_product=Protein kinase domain-containing protein [Source:UniProtKB/TrEMBL;Acc:A0A125YJ16] | transcript_product=rhoptry protein ROP7 | location=AAQM03000462:293-2020(-) | protein_length=575 | sequence_SO=contig | SO=protein_coding_gene | is_pseudo=false	0	FALSE	37.796	21	11	25	6	575	63.4	7.01	23.73	11	0.926	-0.11	0.998957	6.96326e+06	6.44622e+06	4.01	3.81	7.16383e+06	6.7683e+06	6.62229e+06	6.27483e+06	1.32092e+06	768616	2.5049e+06	6.27483e+06	High	Peak Found	High	High	1
TGGT1_411470	transcript=TGGT1_411470-t26_1 | gene=TGGT1_411470 | organism=Toxoplasma_gondii_GT1 | gene_product=Putative transmembrane protein [Source:UniProtKB/TrEMBL;Acc:S7UG13] | transcript_product=putative transmembrane protein | location=AAQM03000493:218-1321(-) | protein_length=367 | sequence_SO=contig | SO=protein_coding_gene | is_pseudo=false	0	FALSE	37.485	39	11	46	1	367	40.3	7.44	83.49	11	0.924	-0.11	0.998957	1.01588e+06	939000	1.53	6.78	1.00496e+06	1.02692e+06	895031	985129	185302	116619	338548	985129	Peak Found	Peak Found	Peak Found	High	1
TGGT1_278440	transcript=TGGT1_278440-t26_1 | gene=TGGT1_278440 | organism=Toxoplasma_gondii_GT1 | gene_product=Putative SWI2/SNF2 Brahma [Source:UniProtKB/TrEMBL;Acc:S7UZS0] | transcript_product=putative SWI2/SNF2 Brahma | location=TGGT1_chrXII:6010021-6025169(+) | protein_length=2667 | sequence_SO=chromosome | SO=protein_coding_gene | is_pseudo=false	0.022	FALSE	1.875	0	1	1	1	2667	285	7.25	1.66	1	0.922	-0.12	0.998957	374878	345528	NA	21.88	374878	NA	403837	295638	69122.6	NA	152752	295638	Peak Found	Not Found	Peak Found	High	1
TGGT1_293590	transcript=TGGT1_293590-t26_1 | gene=TGGT1_293590 | organism=Toxoplasma_gondii_GT1 | gene_product=PKS_KS domain-containing protein [Source:UniProtKB/TrEMBL;Acc:A0A125YFZ7] | transcript_product=putative 3-oxoacyl-acyl-carrier protein synthase I/II | location=TGGT1_chrIa:424590-433347(+) | protein_length=551 | sequence_SO=chromosome | SO=protein_coding_gene | is_pseudo=false	0.037	FALSE	1.505	2	1	1	1	551	58.4	8.48	0	1	0.921	-0.12	0.998957	84739.3	78013.9	1.29	6.33	83967.3	85518.4	74594.3	81590.2	15482.5	9711.58	28215.5	81590.2	Peak Found	Peak Found	Peak Found	High	1
TGGT1_214770	transcript=TGGT1_214770-t26_1 | gene=TGGT1_214770 | organism=Toxoplasma_gondii_GT1 | gene_product=Putative small GTP binding protein rab1a [Source:UniProtKB/TrEMBL;Acc:S7W5S1] | transcript_product=putative small GTP binding protein rab1a | location=TGGT1_chrX:6376684-6380380(+) | protein_length=202 | sequence_SO=chromosome | SO=protein_coding_gene | is_pseudo=false	0	FALSE	10.341	24	4	13	3	202	22.9	7.72	16.19	4	0.92	-0.12	0.998957	7.83236e+06	7.20607e+06	5.27	10.07	8.12967e+06	7.54591e+06	6.71011e+06	7.73869e+06	1.49901e+06	856923	2.53812e+06	7.73869e+06	High	High	High	High	1
TGGT1_239740	transcript=TGGT1_239740-t26_1 | gene=TGGT1_239740 | organism=Toxoplasma_gondii_GT1 | gene_product=Dense granule protein GRA14 [Source:UniProtKB/TrEMBL;Acc:A0A125YJW1] | transcript_product=dense granule protein GRA14 | location=TGGT1_chrVI:875718-876944(-) | protein_length=408 | sequence_SO=chromosome | SO=protein_coding_gene | is_pseudo=false	0	FALSE	23.732	24	9	12	9	408	44.7	8.5	8.62	9	0.919	-0.12	0.998957	3.59008e+06	3.29758e+06	8.48	6.47	3.81226e+06	3.38086e+06	3.14997e+06	3.45212e+06	702931	383934	1.19148e+06	3.45212e+06	High	Peak Found	High	High	1
TGGT1_208830	transcript=TGGT1_208830-t26_1 | gene=TGGT1_208830 | organism=Toxoplasma_gondii_GT1 | gene_product=hypothetical protein | transcript_product=hypothetical protein | location=TGGT1_chrIb:904648-906165(-) | protein_length=505 | sequence_SO=chromosome | SO=protein_coding_gene | is_pseudo=false	0	FALSE	19.112	18	7	11	7	505	54.9	9.95	9.14	7	0.917	-0.13	0.998957	2.78028e+06	2.54903e+06	30.05	6	3.4497e+06	2.24076e+06	2.65951e+06	2.44315e+06	636080	254463	1.00597e+06	2.44315e+06	High	Peak Found	High	High	1
TGGT1_249260	transcript=TGGT1_249260-t26_1 | gene=TGGT1_249260 | organism=Toxoplasma_gondii_GT1 | gene_product=Protein kinase domain-containing protein [Source:UniProtKB/TrEMBL;Acc:S7W928] | transcript_product=putative cell-cycle-associated protein kinase CDK | location=TGGT1_chrXII:4333758-4345741(-) | protein_length=1910 | sequence_SO=chromosome | SO=protein_coding_gene | is_pseudo=false	0.011	FALSE	2.319	0	1	3	1	1910	212.1	9.13	3.79	1	0.91	-0.14	0.998957	819566	745416	20.49	14.67	708281	948336	671728	827189	130598	107694	254083	827189	Peak Found	High	High	High	1
TGGT1_285230	transcript=TGGT1_285230-t26_1 | gene=TGGT1_285230 | organism=Toxoplasma_gondii_GT1 | gene_product=PRP38 family protein [Source:UniProtKB/TrEMBL;Acc:A0A125YPV8] | transcript_product=PRP38 family protein | location=TGGT1_chrV:2356663-2366520(-) | protein_length=614 | sequence_SO=chromosome | SO=protein_coding_gene | is_pseudo=false	0	FALSE	5.666	6	3	3	3	614	68.7	9.66	0	3	0.908	-0.14	0.998957	417160	378847	NA	70.88	NA	417160	218384	657212	NA	47373.2	82604.3	657212	Not Found	High	Peak Found	High	1
TGGT1_209985	transcript=TGGT1_209985-t26_1 | gene=TGGT1_209985 | organism=Toxoplasma_gondii_GT1 | gene_product=Protein kinase domain-containing protein [Source:UniProtKB/TrEMBL;Acc:S7VXT1] | transcript_product=cAMP-dependent protein kinase | location=TGGT1_chrIb:1628949-1629743(-) | protein_length=264 | sequence_SO=chromosome | SO=protein_coding_gene | is_pseudo=false	0	FALSE	8.343	13	3	4	2	264	29.6	9.35	2.13	3	0.905	-0.14	0.998957	289394	261926	18.89	7.77	253006	331016	276731	247914	46651	37590.6	104674	247914	Peak Found	Peak Found	Peak Found	High	1
TGGT1_237230	transcript=TGGT1_237230-t26_1 | gene=TGGT1_237230 | organism=Toxoplasma_gondii_GT1 | gene_product=hypothetical protein | transcript_product=hypothetical protein | location=TGGT1_chrX:5688823-5690440(-) | protein_length=213 | sequence_SO=chromosome | SO=protein_coding_gene | is_pseudo=false	0	FALSE	8.132	21	3	4	3	213	23.9	5.72	2.37	3	0.904	-0.15	0.998957	1.09801e+06	992620	6.63	9.64	1.04767e+06	1.15076e+06	1.06277e+06	927101	193178	130681	401996	927101	Peak Found	High	High	High	1
TGGT1_219738	transcript=TGGT1_219738-t26_1 | gene=TGGT1_219738 | organism=Toxoplasma_gondii_GT1 | gene_product=hypothetical protein | transcript_product=hypothetical protein | location=TGGT1_chrXII:609873-621430(+) | protein_length=2525 | sequence_SO=chromosome | SO=protein_coding_gene | is_pseudo=false	0.037	FALSE	1.493	0	1	1	1	2525	272.6	6.24	0	1	0.901	-0.15	0.998957	331268	298495	15.45	22.06	296860	369664	255049	349342	54737.1	41979.4	96472.9	349342	Peak Found	Peak Found	Peak Found	High	1
TGGT1_258870A	transcript=TGGT1_258870A-t26_1 | gene=TGGT1_258870A | organism=Toxoplasma_gondii_GT1 | gene_product=hypothetical protein | transcript_product=hypothetical protein | location=TGGT1_chrVIIb:3082018-3084228(-) | protein_length=557 | sequence_SO=chromosome | SO=protein_coding_gene | is_pseudo=false	0	FALSE	50.7	32	13	38	6	557	60.6	5.07	54.01	13	0.901	-0.15	0.998957	1.01111e+07	9.11137e+06	5.35	3.15	9.73535e+06	1.05014e+07	8.91052e+06	9.31674e+06	1.79507e+06	1.19255e+06	3.37043e+06	9.31674e+06	High	High	High	High	1	Methylthio [C510; C513]
TGGT1_251780	transcript=TGGT1_251780-t26_1 | gene=TGGT1_251780 | organism=Toxoplasma_gondii_GT1 | gene_product=Heat shock protein [Source:UniProtKB/TrEMBL;Acc:S7V012] | transcript_product=heat shock protein | location=TGGT1_chrXII:5504595-5509577(-) | protein_length=728 | sequence_SO=chromosome | SO=protein_coding_gene | is_pseudo=false	0	FALSE	31.269	22	11	16	10	728	78.2	7.17	18.72	11	0.899	-0.15	0.998957	4.50673e+06	4.04938e+06	4.74	3.62	4.35811e+06	4.66043e+06	4.1544e+06	3.94701e+06	803578	529244	1.57141e+06	3.94701e+06	High	Peak Found	High	High	1	Methylthio [C420]
TGGT1_273490	transcript=TGGT1_273490-t26_1 | gene=TGGT1_273490 | organism=Toxoplasma_gondii_GT1 | gene_product=Gln-synt_C domain-containing protein [Source:UniProtKB/TrEMBL;Acc:S7WJT1] | transcript_product=putative glutamine synthetase, type I | location=TGGT1_chrVIII:3443164-3448518(+) | protein_length=479 | sequence_SO=chromosome | SO=protein_coding_gene | is_pseudo=false	0	FALSE	5.025	5	2	2	2	479	53.4	6.55	0	2	0.899	-0.15	0.998957	292106	262713	2.87	4.31	286234	298099	270847	254823	52777.7	33852.5	102449	254823	Peak Found	Peak Found	Peak Found	High	1	Methylthio [C360]
TGGT1_209170	transcript=TGGT1_209170-t26_1 | gene=TGGT1_209170 | organism=Toxoplasma_gondii_GT1 | gene_product=hypothetical protein | transcript_product=hypothetical protein | location=TGGT1_chrIb:1108738-1109988(-) | protein_length=416 | sequence_SO=chromosome | SO=protein_coding_gene | is_pseudo=false	0.003	FALSE	2.938	2	1	1	1	416	45.5	6.13	2.26	1	0.897	-0.16	0.998957	83214.8	74638.4	NA	36.14	83214.8	NA	57473.8	96929.3	15343.7	NA	21739.6	96929.3	Peak Found	Not Found	Peak Found	High	1
TGGT1_213350	transcript=TGGT1_213350-t26_1 | gene=TGGT1_213350 | organism=Toxoplasma_gondii_GT1 | gene_product=Ribosomal protein RPS15 [Source:UniProtKB/TrEMBL;Acc:A0A125YHZ1] | transcript_product=ribosomal protein RPS15 | location=TGGT1_chrV:820008-821446(-) | protein_length=150 | sequence_SO=chromosome | SO=protein_coding_gene | is_pseudo=false	0	FALSE	9.335	29	3	5	3	150	17.1	10.2	9.33	3	0.896	-0.16	0.998957	3.07674e+06	2.75787e+06	31.85	20.11	3.86896e+06	2.44674e+06	2.39004e+06	3.18231e+06	713386	277855	904040	3.18231e+06	Peak Found	High	High	High	1	Methylthio [C72]
TGGT1_280700	transcript=TGGT1_280700-t26_1 | gene=TGGT1_280700 | organism=Toxoplasma_gondii_GT1 | gene_product=Arginine decarboxylase [Source:UniProtKB/TrEMBL;Acc:S7UTQ6] | transcript_product=arginine decarboxylase | location=TGGT1_chrVIIa:143677-151297(-) | protein_length=1225 | sequence_SO=chromosome | SO=protein_coding_gene | is_pseudo=false	0.013	FALSE	2.219	1	1	2	1	1225	135.6	6.83	1.93	1	0.896	-0.16	0.998957	292671	262124	17.33	9.12	331039	258751	245725	279617	61039.2	29384	92946	279617	High	Peak Found	Peak Found	High	1
TGGT1_315140	transcript=TGGT1_315140-t26_1 | gene=TGGT1_315140 | organism=Toxoplasma_gondii_GT1 | gene_product=WD_REPEATS_REGION domain-containing protein [Source:UniProtKB/TrEMBL;Acc:S7UMA9] | transcript_product=WD domain, G-beta repeat-containing protein | location=TGGT1_chrXI:4459459-4466175(-) | protein_length=1462 | sequence_SO=chromosome | SO=protein_coding_gene | is_pseudo=false	0.004	FALSE	2.735	1	1	1	1	1462	155.4	7.08	1.64	1	0.896	-0.16	0.998957	110907	99362.3	14.89	14.91	123266	99786.7	110452	89386.1	22728.6	11331.9	41778.7	89386.1	Peak Found	Peak Found	Peak Found	High	1
TGGT1_273770	transcript=TGGT1_273770-t26_1 | gene=TGGT1_273770 | organism=Toxoplasma_gondii_GT1 | gene_product=hypothetical protein | transcript_product=hypothetical protein | location=TGGT1_chrVIII:3282484-3283833(+) | protein_length=179 | sequence_SO=chromosome | SO=protein_coding_gene | is_pseudo=false	0.009	FALSE	2.437	7	1	1	1	179	20.1	6.7	0	1	0.895	-0.16	0.998957	192587	172355	3.06	7.29	188465	196799	163691	181479	34750.5	22348.8	61916.4	181479	Peak Found	Peak Found	Peak Found	High	1
TGGT1_278990	transcript=TGGT1_278990-t26_1 | gene=TGGT1_278990 | organism=Toxoplasma_gondii_GT1 | gene_product=Putative phosphate carrier [Source:UniProtKB/TrEMBL;Acc:A0A125YTR2] | transcript_product=putative phosphate carrier | location=TGGT1_chrXII:5622211-5625652(-) | protein_length=479 | sequence_SO=chromosome | SO=protein_coding_gene | is_pseudo=false	0	FALSE	16.612	17	6	10	6	479	53.1	9.41	9.3	6	0.895	-0.16	0.998957	1.40345e+06	1.25669e+06	21.75	0.51	1.20188e+06	1.63882e+06	1.26127e+06	1.25214e+06	221611	186107	477078	1.25214e+06	High	Peak Found	High	High	1
TGGT1_277270	transcript=TGGT1_277270-t26_1 | gene=TGGT1_277270 | organism=Toxoplasma_gondii_GT1 | gene_product=NTPase II [Source:UniProtKB/TrEMBL;Acc:S7UGK0] | transcript_product=NTPase II | location=AAQM03000418:1-4939(+) | protein_length=862 | sequence_SO=contig | SO=protein_coding_gene | is_pseudo=false	0	FALSE	20.163	14	8	10	6	862	95.7	6.74	6.5	8	0.894	-0.16	0.998957	1.32956e+06	1.18908e+06	17.61	2.08	1.5068e+06	1.17317e+06	1.20674e+06	1.17168e+06	277834	133227	456454	1.17168e+06	High	Peak Found	Peak Found	High	1	Methylthio [C277; C390; C422; C842]
TGGT1_410360	transcript=TGGT1_410360-t26_1 | gene=TGGT1_410360 | organism=Toxoplasma_gondii_GT1 | gene_product=Putative transmembrane protein [Source:UniProtKB/TrEMBL;Acc:S7ULN4] | transcript_product=putative transmembrane protein | location=TGGT1_chrII:71310-72374(+) | protein_length=354 | sequence_SO=chromosome | SO=protein_coding_gene | is_pseudo=false	0	FALSE	40.353	39	10	40	4	354	38.1	6.11	83.91	10	0.894	-0.16	0.998957	1.30435e+07	1.16633e+07	16.06	6.27	1.16373e+07	1.46197e+07	1.2192e+07	1.11575e+07	2.14576e+06	1.66023e+06	4.61164e+06	1.11575e+07	High	High	High	High	1
TGGT1_266470	transcript=TGGT1_266470-t26_1 | gene=TGGT1_266470 | organism=Toxoplasma_gondii_GT1 | gene_product=hypothetical protein | transcript_product=hypothetical protein | location=TGGT1_chrIX:940675-941958(+) | protein_length=120 | sequence_SO=chromosome | SO=protein_coding_gene | is_pseudo=false	0.009	FALSE	2.408	12	1	1	1	120	14.1	9.19	0	1	0.893	-0.16	0.998957	31325.9	27960.6	10.09	40.53	29165	33646.8	37547.8	20821.3	5377.64	3820.98	14202.6	20821.3	Peak Found	Peak Found	Peak Found	High	1	Methylthio [C10]
TGGT1_307980	transcript=TGGT1_307980-t26_1 | gene=TGGT1_307980 | organism=Toxoplasma_gondii_GT1 | gene_product=Translation factor GUF1 homolog, mitochondrial [Source:UniProtKB/TrEMBL;Acc:A0A125YTP2] | transcript_product=putative GTP-binding protein lepA | location=TGGT1_chrXII:420631-429728(+) | protein_length=806 | sequence_SO=chromosome | SO=protein_coding_gene | is_pseudo=false	0.037	FALSE	1.529	1	1	1	1	806	88.9	9.33	0	1	0.89	-0.17	0.998957	619722	551362	9.41	8.88	662403	579791	517758	587147	122138	65841.7	195843	587147	Peak Found	Peak Found	Peak Found	High	1
TGGT1_210787	transcript=TGGT1_210787-t26_1 | gene=TGGT1_210787 | organism=Toxoplasma_gondii_GT1 | gene_product=Sulfhydryl oxidase [Source:UniProtKB/TrEMBL;Acc:S7VZ72] | transcript_product=Erv1 / Alr family protein | location=TGGT1_chrIV:1991623-1992523(+) | protein_length=146 | sequence_SO=chromosome | SO=protein_coding_gene | is_pseudo=false	0.049	FALSE	1.399	5	1	1	1	146	16	8.03	0	1	0.888	-0.17	0.998957	303673	269708	10.57	22.54	281765	327284	229651	316752	51953.7	37166.8	86866.2	316752	Peak Found	Peak Found	High	Peak Found	1
TGGT1_248500	transcript=TGGT1_248500-t26_1 | gene=TGGT1_248500 | organism=Toxoplasma_gondii_GT1 | gene_product=Nup54 domain-containing protein [Source:UniProtKB/TrEMBL;Acc:S7V107] | transcript_product=hypothetical protein | location=TGGT1_chrXII:3823885-3826856(+) | protein_length=346 | sequence_SO=chromosome | SO=protein_coding_gene | is_pseudo=false	0.002	FALSE	3.922	6	1	2	1	346	37.5	6.43	3.09	1	0.887	-0.17	0.998957	168731	149704	NA	57.67	NA	168731	230821	97094.2	NA	19161.3	87308.5	97094.2	Not Found	Peak Found	High	High	1
TGGT1_227280	transcript=TGGT1_227280-t26_1 | gene=TGGT1_227280 | organism=Toxoplasma_gondii_GT1 | gene_product=Dense granule protein GRA3 [Source:UniProtKB/TrEMBL;Acc:A0A125YJQ7] | transcript_product=dense granule protein GRA3 | location=TGGT1_chrX:956231-956899(-) | protein_length=222 | sequence_SO=chromosome | SO=protein_coding_gene | is_pseudo=false	0	FALSE	17.303	24	5	17	5	222	24.2	9.44	20.46	5	0.88	-0.18	0.998957	1.8934e+07	1.66639e+07	6.52	0.04	1.80808e+07	1.98275e+07	1.66592e+07	1.66685e+07	3.33386e+06	2.25164e+06	6.3014e+06	1.66685e+07	High	High	High	High	1
TGGT1_262720	transcript=TGGT1_262720-t26_1 | gene=TGGT1_262720 | organism=Toxoplasma_gondii_GT1 | gene_product=S1-like domain-containing protein [Source:UniProtKB/TrEMBL;Acc:A0A125YPW3] | transcript_product=putative eukaryotic initiation factor-1A | location=TGGT1_chrVIIb:1033429-1037458(-) | protein_length=159 | sequence_SO=chromosome | SO=protein_coding_gene | is_pseudo=false	0.003	FALSE	3.083	11	2	2	2	159	17.9	5.02	0	2	0.88	-0.19	0.998957	312110	274502	46.82	2.98	221250	440282	280354	268771	40795.6	49998.9	106045	268771	Peak Found	Peak Found	Peak Found	High	1
TGGT1_316250	transcript=TGGT1_316250-t26_1 | gene=TGGT1_316250 | organism=Toxoplasma_gondii_GT1 | gene_product=hypothetical protein | transcript_product=hypothetical protein | location=TGGT1_chrXI:5154312-5155496(-) | protein_length=394 | sequence_SO=chromosome | SO=protein_coding_gene | is_pseudo=false	0.014	FALSE	1.982	2	1	3	1	394	44.8	4.93	0	1	0.88	-0.18	0.998957	261559	230215	15.57	3.94	234191	292126	236728	223881	43181.7	33174.1	89542.9	223881	Peak Found	High	High	High	1
TGGT1_202460	transcript=TGGT1_202460-t26_1 | gene=TGGT1_202460 | organism=Toxoplasma_gondii_GT1 | gene_product=Diacylglycerol kinase [Source:UniProtKB/TrEMBL;Acc:S7UUK3] | transcript_product=diacylglycerol kinase accessory domain (presumed) domain-containing protein | location=TGGT1_chrVIIa:3208196-3216030(-) | protein_length=679 | sequence_SO=chromosome | SO=protein_coding_gene | is_pseudo=false	0	FALSE	5.853	5	3	3	3	679	73	8.51	0	3	0.878	-0.19	0.998957	524867	460982	27.07	1.54	432408	637095	455994	466024	79730.4	72349.3	172481	466024	Peak Found	Peak Found	Peak Found	High	1	Methylthio [C224; C673]
TGGT1_311720	transcript=TGGT1_311720-t26_1 | gene=TGGT1_311720 | organism=Toxoplasma_gondii_GT1 | gene_product=Chaperonin protein BiP [Source:UniProtKB/TrEMBL;Acc:A0A125YJG4] | transcript_product=chaperonin protein BiP | location=TGGT1_chrXI:2188121-2191497(-) | protein_length=668 | sequence_SO=chromosome | SO=protein_coding_gene | is_pseudo=false	0	FALSE	77.682	40	21	68	20	668	73.2	5.38	120.59	21	0.876	-0.19	0.998957	5.60406e+07	4.90674e+07	17.85	0.83	4.93607e+07	6.36245e+07	4.93557e+07	4.87808e+07	9.10147e+06	7.22528e+06	1.86689e+07	4.87808e+07	High	High	High	High	1	Methylthio [C634]
TGGT1_258390	transcript=TGGT1_258390-t26_1 | gene=TGGT1_258390 | organism=Toxoplasma_gondii_GT1 | gene_product=J domain-containing protein [Source:UniProtKB/TrEMBL;Acc:S7W7H7] | transcript_product=putative DnaJ protein | location=TGGT1_chrVIIb:3406355-3407941(-) | protein_length=397 | sequence_SO=chromosome | SO=protein_coding_gene | is_pseudo=false	0	FALSE	39.307	44	12	30	12	397	44.6	6.93	40.75	12	0.874	-0.19	0.998957	1.04563e+07	9.13761e+06	6.87	5.25	9.96044e+06	1.09769e+07	8.80438e+06	9.48346e+06	1.83658e+06	1.24655e+06	3.33028e+06	9.48346e+06	High	High	High	High	1	Methylthio [C224]
TGGT1_275690	transcript=TGGT1_275690-t26_1 | gene=TGGT1_275690 | organism=Toxoplasma_gondii_GT1 | gene_product=Putative ClpB [Source:UniProtKB/TrEMBL;Acc:S7UMM6] | transcript_product=putative ClpB | location=TGGT1_chrIII:255659-267189(+) | protein_length=1022 | sequence_SO=chromosome | SO=protein_coding_gene | is_pseudo=false	0.011	FALSE	2.32	1	1	1	1	1022	114.5	7.9	0	1	0.874	-0.19	0.998957	120778	105530	NA	11.96	120778	NA	96954	114865	22269.8	NA	36673.1	114865	Peak Found	Not Found	Peak Found	High	1
TGGT1_260520	transcript=TGGT1_260520-t26_1 | gene=TGGT1_260520 | organism=Toxoplasma_gondii_GT1 | gene_product=hypothetical protein | transcript_product=hypothetical protein | location=TGGT1_chrVIIb:2164696-2167131(-) | protein_length=742 | sequence_SO=chromosome | SO=protein_coding_gene | is_pseudo=false	0	FALSE	17.306	11	7	8	7	742	77	7.71	4	7	0.873	-0.2	0.998957	1.73135e+06	1.51109e+06	24.74	7.9	1.45085e+06	2.0661e+06	1.59799e+06	1.42892e+06	267517	234629	604445	1.42892e+06	High	Peak Found	High	High	1
TGGT1_309380	transcript=TGGT1_309380-t26_1 | gene=TGGT1_309380 | organism=Toxoplasma_gondii_GT1 | gene_product=Nuf2 [Source:UniProtKB/TrEMBL;Acc:S7UT27] | transcript_product=Nuf2 | location=TGGT1_chrXI:612028-618783(-) | protein_length=608 | sequence_SO=chromosome | SO=protein_coding_gene | is_pseudo=false	0.033	FALSE	1.596	2	1	1	1	608	69.9	5.64	0	1	0.873	-0.2	0.998957	1.68565e+06	1.47122e+06	31.96	50.18	2.12152e+06	1.33933e+06	1.01529e+06	2131887	391180	152096	384036	2131887	High	Peak Found	Peak Found	Peak Found	1	Phospho [T429]
TGGT1_256770	transcript=TGGT1_256770-t26_1 | gene=TGGT1_256770 | organism=Toxoplasma_gondii_GT1 | gene_product=Putative eukaryotic translation initiation factor 4A, isoform 3 [Source:UniProtKB/TrEMBL;Acc:A0A125YSV5] | transcript_product=putative eukaryotic translation initiation factor 4A, isoform 3 | location=TGGT1_chrVIIb:4408455-4411451(+) | protein_length=395 | sequence_SO=chromosome | SO=protein_coding_g…	0	FALSE	36.111	36	13	31	13	395	45.1	6.38	31.6	13	0.872	-0.2	0.998957	9.16461e+06	7.99121e+06	7.11	3.57	9.6374e+06	8.71502e+06	8.19545e+06	7.79206e+06	1.77701e+06	989688	3.09995e+06	7.79206e+06	High	High	High	High	1
TGGT1_223920	transcript=TGGT1_223920-t26_1 | gene=TGGT1_223920 | organism=Toxoplasma_gondii_GT1 | gene_product=Rhoptry neck protein RON3 [Source:UniProtKB/TrEMBL;Acc:S7UWM8] | transcript_product=rhoptry neck protein RON3 | location=TGGT1_chrX:3357300-3367973(+) | protein_length=1958 | sequence_SO=chromosome | SO=protein_coding_gene | is_pseudo=false	0	FALSE	87.882	20	32	58	32	1958	222.9	9.16	63.07	32	0.871	-0.2	0.998957	2.11729e+07	1.84328e+07	11.42	5.42	1.95269e+07	2.29576e+07	1.7739e+07	1.91537e+07	3.6005e+06	2.6071e+06	6.70983e+06	1.91537e+07	High	High	High	High	1	Methylthio [C471; C663; C1796]
TGGT1_207730	transcript=TGGT1_207730-t26_1 | gene=TGGT1_207730 | organism=Toxoplasma_gondii_GT1 | gene_product=hypothetical protein | transcript_product=hypothetical protein | location=TGGT1_chrIb:261236-265294(-) | protein_length=1243 | sequence_SO=chromosome | SO=protein_coding_gene | is_pseudo=false	0.014	FALSE	1.972	1	1	1	1	1243	137.5	8.37	0	1	0.87	-0.2	0.998957	574109	499723	12.19	11.99	625904	526599	544051	459006	115409	59801.3	205789	459006	Peak Found	Peak Found	High	Peak Found	1
TGGT1_240640	transcript=TGGT1_240640-t26_1 | gene=TGGT1_240640 | organism=Toxoplasma_gondii_GT1 | gene_product=Protein kinase domain-containing protein [Source:UniProtKB/TrEMBL;Acc:A0A125YXS9] | transcript_product=casein kinase I | location=TGGT1_chrVI:1321734-1325141(+) | protein_length=324 | sequence_SO=chromosome | SO=protein_coding_gene | is_pseudo=false	0.01	FALSE	2.376	3	1	1	1	324	37.9	9.13	0	1	0.869	-0.2	0.998957	223719	194318	26.19	7.41	269822	185494	184392	204779	49751.6	21064.9	69746.7	204779	Peak Found	Peak Found	Peak Found	High	1	Methylthio [C241]
TGGT1_247230	transcript=TGGT1_247230-t26_1 | gene=TGGT1_247230 | organism=Toxoplasma_gondii_GT1 | gene_product=Centrin [Source:UniProtKB/TrEMBL;Acc:A0A125YHX6] | transcript_product=centrin | location=TGGT1_chrXII:3112753-3115530(+) | protein_length=169 | sequence_SO=chromosome | SO=protein_coding_gene | is_pseudo=false	0	FALSE	5.005	16	2	3	2	169	19.3	4.89	3.73	2	0.864	-0.21	0.998957	1.95085e+06	1.68548e+06	57.99	24.73	1.26183e+06	3.01611e+06	2.01115e+06	1.41254e+06	232664	342513	760724	1.41254e+06	Peak Found	Peak Found	High	High	1
[truncated: 309 more rows]

## Sheet: 1.2_SPARK_mNG_mAID_IPs
Protein_ID	Description	Exp.q.value.Combined	Contaminant	Sum.PEP.Score	Coverage.in.Percent	Number.of.Peptides	Number.of.PSMs	Number.of.Unique.Peptides	Number.of.AAs	MW.in.kDa	calc.pI	Score.Sequest.HT.Sequest.HT	Number.of.Peptides.by.Search.Engine.Sequest.HT	Abundance.Ratio.SPARK_mNG_mAID..TIR1	Abundance.Ratio.log2.SPARK_mNG_mAID..TIR1	Abundance.Ratio.Adj.P.Value.SPARK_mNG_mAID..TIR1	Abundance.Ratio.Variability.in.Percent.SPARK_mNG_mAID..TIR1	Abundances.Grouped.SPARK_mNG_mAID	Abundances.Grouped.TIR1	Abundances.Grouped.CV.in.Percent.SPARK_mNG_mAID	Abundances.Grouped.CV.in.Percent.TIR1	Abundances.Normalized.F1.Sample.SPARK_mNG_mAID.R1	Abundances.Normalized.F3.Sample.SPARK_mNG_mAID.R2	Abundances.Normalized.F2.Sample.TIR1.R1	Abundances.Normalized.F4.Sample.TIR1.R2	Found.in.Sample.in.S1.F1.Sample.SPARK_mNG_mAID.R1	Found.in.Sample.in.S3.F3.Sample.SPARK_mNG_mAID.R2	Found.in.Sample.in.S2.F2.Sample.TIR1.R1	Found.in.Sample.in.S4.F4.Sample.TIR1.R2	Number.of.Protein.Groups	Modifications
[truncated: 2,711 more rows]

[truncated: 2 more sheets: 1.3_SPARKEL_Ty_IPs, 1.4_PKAC3_mNG_IPs]
