# Supplementary material for: SPARK regulates AGC kinases central to the Toxoplasma gondii asexual cycle
Source: bioRxiv preprint, doi:10.1101/2023.10.30.564746, version 2 (2024-05-02)
Supplement: Supplementary File 2 [file 564746_file04.xlsx]

## Sheet: 2.1_SPARKEL_TurboID
Protein_ID	Description	Exp.q.value.Combined	Contaminant	Sum.PEP.Score	Coverage.in.Percent	Number.of.Peptides	Number.of.PSMs	Number.of.Unique.Peptides	Number.of.AAs	MW.in.kDa	calc.pI	Score.Sequest.HT.Sequest.HT	Number.of.Peptides.by.Search.Engine.Sequest.HT	Abundance.Ratio.SPARKEL.TurboID..mNG.TurboID	Abundance.Ratio.log2.SPARKEL.TurboID..mNG.TurboID	Abundance.Ratio.Adj.P.Value.SPARKEL.TurboID..mNG.TurboID	Abundances.Grouped.mNG.TurboID	Abundances.Grouped.SPARKEL.TurboID	Abundances.Grouped.CV.in.Percent.mNG.TurboID	Abundances.Grouped.CV.in.Percent.SPARKEL.TurboID	Abundances.Grouped.Count.mNG.TurboID	Abundances.Grouped.Count.SPARKEL.TurboID	Abundances.Normalized.F80.Sample.mNG.TurboID.R1	Abundances.Normalized.F82.Sample.mNG.TurboID.R2	Abundances.Normalized.F81.Sample.SPARKEL.TurboID.R1	Abundances.Normalized.F83.Sample.SPARKEL.TurboID.R2	Abundance.F80.Sample.mNG.TurboID.R1	Abundance.F82.Sample.mNG.TurboID.R2	Abundance.F81.Sample.SPARKEL.TurboID.R1	Abundance.F83.Sample.SPARKEL.TurboID.R2	Abundances.Count.F80.Sample.mNG.TurboID.R1	Abundances.Count.F82.Sample.mNG.TurboID.R2	Abundances.Count.F81.Sample.SPARKEL.TurboID.R1	Abundances.Count.F83.Sample.SPARKEL.TurboID.R2	Found.in.Sample.in.S78.F80.Sample.mNG.TurboID.R1	Found.in.Sample.in.S80.F82.Sample.mNG.TurboID.R2	Found.in.Sample.in.S79.F81.Sample.SPARKEL.TurboID.R1	Found.in.Sample.in.S81.F83.Sample.SPARKEL.TurboID.R2	Number.of.Protein.Groups	Modifications
TGGT1_226680	transcript=TGGT1_226680-t26_1 | gene=TGGT1_226680 | organism=Toxoplasma_gondii_GT1 | gene_product=hypothetical protein | transcript_product=hypothetical protein | location=TGGT1_chrX:1350715-1356291(-) | protein_length=899 | sequence_SO=chromosome | SO=protein_coding_gene | is_pseudo=false	0.001	FALSE	3.31	3	1	1	1	899	98	7.97	0	1	NA	NA	NA	NA	NA	NA	NA	NA	NA	NA	NA	NA	NA	NA	NA	NA	NA	NA	NA	NA	NA	Not Found	High	Not Found	Not Found	1
TGGT1_290005	transcript=TGGT1_290005-t26_1 | gene=TGGT1_290005 | organism=Toxoplasma_gondii_GT1 | gene_product=Putative proteasome subunit beta type 1 [Source:UniProtKB/TrEMBL;Acc:S7VXS6] | transcript_product=putative proteasome subunit beta type 1 | location=TGGT1_chrIX:3387292-3392148(-) | protein_length=359 | sequence_SO=chromosome | SO=protein_coding_gene | is_pseudo=false	0.063	FALSE	1.491	6	1	1	1	359	39.9	9.19	0	1	NA	NA	NA	NA	NA	NA	NA	NA	NA	NA	NA	NA	NA	NA	NA	NA	NA	NA	NA	NA	NA	Not Found	Not Found	Not Found	High	1	Methylthio [C284]
TGGT1_260420	transcript=TGGT1_260420-t26_1 | gene=TGGT1_260420 | organism=Toxoplasma_gondii_GT1 | gene_product=HEC/Ndc80p family protein [Source:UniProtKB/TrEMBL;Acc:S7UYN8] | transcript_product=HEC/Ndc80p family protein | location=TGGT1_chrVIIb:2260663-2271055(-) | protein_length=728 | sequence_SO=chromosome | SO=protein_coding_gene | is_pseudo=false	0.004	FALSE	2.696	2	1	1	1	728	81	7.43	0	1	NA	NA	NA	NA	NA	NA	NA	NA	NA	NA	NA	NA	NA	NA	NA	NA	NA	NA	NA	NA	NA	Not Found	High	Not Found	Not Found	1
TGGT1_212800	transcript=TGGT1_212800-t26_1 | gene=TGGT1_212800 | organism=Toxoplasma_gondii_GT1 | gene_product=hypothetical protein | transcript_product=hypothetical protein | location=TGGT1_chrV:477211-479584(-) | protein_length=671 | sequence_SO=chromosome | SO=protein_coding_gene | is_pseudo=false	0.033	FALSE	1.792	1	1	2	1	671	73.1	8.82	0	1	NA	NA	NA	NA	NA	NA	NA	NA	NA	NA	NA	NA	NA	NA	NA	NA	NA	NA	NA	NA	NA	Not Found	High	Not Found	High	1
TGGT1_236870	transcript=TGGT1_236870-t26_1 | gene=TGGT1_236870 | organism=Toxoplasma_gondii_GT1 | gene_product=hypothetical protein | transcript_product=hypothetical protein | location=TGGT1_chrX:5454717-5455361(-) | protein_length=214 | sequence_SO=chromosome | SO=protein_coding_gene | is_pseudo=false	0.049	FALSE	1.653	4	1	1	1	214	23.8	7.68	0	1	NA	NA	NA	NA	NA	NA	NA	NA	NA	NA	NA	NA	NA	NA	NA	NA	NA	NA	NA	NA	NA	High	Not Found	Not Found	Not Found	1
TGGT1_274160	transcript=TGGT1_274160-t26_1 | gene=TGGT1_274160 | organism=Toxoplasma_gondii_GT1 | gene_product=hypothetical protein | transcript_product=hypothetical protein | location=TGGT1_chrVIII:2959044-2970388(+) | protein_length=522 | sequence_SO=chromosome | SO=protein_coding_gene | is_pseudo=false	0.011	FALSE	2.211	2	1	1	1	522	58.4	9.31	0	1	NA	NA	NA	NA	NA	NA	NA	NA	NA	NA	NA	NA	NA	NA	NA	NA	NA	NA	NA	NA	NA	High	Not Found	Not Found	Not Found	1
TGGT1_204310	transcript=TGGT1_204310-t26_1 | gene=TGGT1_204310 | organism=Toxoplasma_gondii_GT1 | gene_product=hypothetical protein | transcript_product=hypothetical protein | location=TGGT1_chrVIIa:1788678-1809780(+) | protein_length=2209 | sequence_SO=chromosome | SO=protein_coding_gene | is_pseudo=false	0.002	FALSE	2.987	0	1	1	1	2209	242.3	6.19	0	1	NA	NA	NA	NA	NA	NA	NA	NA	NA	NA	NA	NA	NA	NA	NA	NA	NA	NA	NA	NA	NA	Peak Found	High	Peak Found	Peak Found	1
TGGT1_233770A	transcript=TGGT1_233770A-t26_1 | gene=TGGT1_233770A | organism=Toxoplasma_gondii_GT1 | gene_product=Cation_ATPase_N domain-containing protein [Source:UniProtKB/TrEMBL;Acc:S7V3L9] | transcript_product=calcium-translocating P-type ATPase, PMCA-type protein | location=TGGT1_chrVIII:2786193-2792937(-) | protein_length=908 | sequence_SO=chromosome | SO=protein_coding_gene | is_pseudo=false	0.056	FALSE	1.571	2	1	1	1	908	99.1	6.32	0	1	NA	NA	NA	NA	NA	NA	NA	NA	NA	NA	NA	NA	NA	NA	NA	NA	NA	NA	NA	NA	NA	High	Peak Found	Peak Found	Peak Found	1
TGGT1_255700	transcript=TGGT1_255700-t26_1 | gene=TGGT1_255700 | organism=Toxoplasma_gondii_GT1 | gene_product=hypothetical protein | transcript_product=hypothetical protein | location=TGGT1_chrVIIb:4619828-4634043(-) | protein_length=3695 | sequence_SO=chromosome | SO=protein_coding_gene | is_pseudo=false	0.03	FALSE	1.882	1	1	1	1	3695	404	6.07	0	1	NA	NA	NA	NA	NA	NA	NA	NA	NA	NA	NA	NA	NA	NA	NA	NA	NA	NA	NA	NA	NA	Not Found	High	Not Found	Not Found	1	Methylthio [C302]
TGGT1_226730	transcript=TGGT1_226730-t26_1 | gene=TGGT1_226730 | organism=Toxoplasma_gondii_GT1 | gene_product=Aconitate hydratase ACN/IRP [Source:UniProtKB/TrEMBL;Acc:S7UWQ3] | transcript_product=aconitate hydratase ACN/IRP | location=TGGT1_chrX:1308814-1316049(-) | protein_length=1055 | sequence_SO=chromosome | SO=protein_coding_gene | is_pseudo=false	0.03	FALSE	1.82	2	1	1	1	1055	114.8	8.37	0	1	NA	NA	NA	NA	NA	NA	NA	NA	NA	NA	NA	NA	NA	NA	NA	NA	NA	NA	NA	NA	NA	High	Not Found	Not Found	Not Found	1
TGGT1_244370	transcript=TGGT1_244370-t26_1 | gene=TGGT1_244370 | organism=Toxoplasma_gondii_GT1 | gene_product=Putative TDC1 [Source:UniProtKB/TrEMBL;Acc:S7UFY7] | transcript_product=putative TDC1 | location=TGGT1_chrVI:3132400-3134154(+) | protein_length=584 | sequence_SO=chromosome | SO=protein_coding_gene | is_pseudo=false	0.001	FALSE	3.017	2	1	1	1	584	64.3	7.75	0	1	NA	NA	NA	NA	NA	NA	NA	NA	NA	NA	NA	NA	NA	NA	NA	NA	NA	NA	NA	NA	NA	Peak Found	Peak Found	High	Peak Found	1
TGGT1_267620	transcript=TGGT1_267620-t26_1 | gene=TGGT1_267620 | organism=Toxoplasma_gondii_GT1 | gene_product=Multi-pass transmembrane protein [Source:UniProtKB/TrEMBL;Acc:S7UGQ1] | transcript_product=multi-pass transmembrane protein | location=TGGT1_chrIX:346132-354477(+) | protein_length=508 | sequence_SO=chromosome | SO=protein_coding_gene | is_pseudo=false	0.063	FALSE	1.51	2	1	1	1	508	57.6	5.69	0	1	NA	NA	NA	NA	NA	NA	NA	NA	NA	NA	NA	NA	NA	NA	NA	NA	NA	NA	NA	NA	NA	High	Peak Found	Peak Found	Peak Found	1
TGGT1_311840	transcript=TGGT1_311840-t26_1 | gene=TGGT1_311840 | organism=Toxoplasma_gondii_GT1 | gene_product=hypothetical protein | transcript_product=hypothetical protein | location=TGGT1_chrXI:2277933-2279265(-) | protein_length=233 | sequence_SO=chromosome | SO=protein_coding_gene | is_pseudo=false	0.006	FALSE	2.581	5	1	1	1	233	25.7	6.51	0	1	NA	NA	NA	NA	NA	NA	NA	NA	NA	NA	NA	NA	NA	NA	NA	NA	NA	NA	NA	NA	NA	High	Not Found	Not Found	Not Found	1
TGGT1_211310	transcript=TGGT1_211310-t26_1 | gene=TGGT1_211310 | organism=Toxoplasma_gondii_GT1 | gene_product=hypothetical protein | transcript_product=hypothetical protein | location=TGGT1_chrIV:1764498-1774868(+) | protein_length=2834 | sequence_SO=chromosome | SO=protein_coding_gene | is_pseudo=false	0.008	FALSE	2.301	1	1	1	1	2834	303.9	8.24	0	1	100	6.64	6.44706e-16	NA	152687	NA	4.4	NA	2	NA	NA	157514	148007	NA	NA	137813	90897.3	NA	NA	1	1	Not Found	Not Found	High	Peak Found	1
TGGT1_305820	transcript=TGGT1_305820-t26_1 | gene=TGGT1_305820 | organism=Toxoplasma_gondii_GT1 | gene_product=SGS domain-containing protein [Source:UniProtKB/TrEMBL;Acc:A0A125YLY4] | transcript_product=SGS domain-containing protein | location=TGGT1_chrIX:5384029-5387924(+) | protein_length=262 | sequence_SO=chromosome | SO=protein_coding_gene | is_pseudo=false	0.001	FALSE	3.534	4	1	2	1	262	30	6.81	1.6	1	100	6.64	6.44706e-16	NA	575165	NA	11.2	NA	2	NA	NA	622667	531288	NA	NA	544786	326286	NA	NA	1	1	Not Found	Not Found	High	High	1
TGGT1_268210	transcript=TGGT1_268210-t26_1 | gene=TGGT1_268210 | organism=Toxoplasma_gondii_GT1 | gene_product=Protein kinase domain-containing protein [Source:UniProtKB/TrEMBL;Acc:S7V4V0] | transcript_product=AGC kinase | location=TGGT1_chrVIII:6636910-6641684(-) | protein_length=515 | sequence_SO=chromosome | SO=protein_coding_gene | is_pseudo=false	0	FALSE	34.319	21	9	23	9	515	57.8	5.85	17.11	9	100	6.64	6.44706e-16	24862.4	1.36168e+07	NA	35.69	1	2	24862.4	NA	1.05205e+07	1.76242e+07	23459.1	NA	9.20467e+06	1.08238e+07	1	NA	8	9	Peak Found	Not Found	High	High	1
TGGT1_321520	transcript=TGGT1_321520-t26_1 | gene=TGGT1_321520 | organism=Toxoplasma_gondii_GT1 | gene_product=CS domain-containing protein [Source:UniProtKB/TrEMBL;Acc:A0A125YW01] | transcript_product=hypothetical protein | location=TGGT1_chrIb:1764465-1766439(+) | protein_length=232 | sequence_SO=chromosome | SO=protein_coding_gene | is_pseudo=false	0.001	FALSE	3.672	8	1	1	1	232	25.2	4.6	0	1	100	6.64	6.44706e-16	NA	186273	NA	NA	NA	1	NA	NA	186273	NA	NA	NA	162975	NA	NA	NA	1	NA	Not Found	Not Found	High	Not Found	1
TGGT1_214290	transcript=TGGT1_214290-t26_1 | gene=TGGT1_214290 | organism=Toxoplasma_gondii_GT1 | gene_product=DJ-1_PfpI domain-containing protein [Source:UniProtKB/TrEMBL;Acc:A0A125YQ11] | transcript_product=DJ-1 family protein | location=TGGT1_chrX:6106825-6108652(+) | protein_length=256 | sequence_SO=chromosome | SO=protein_coding_gene | is_pseudo=false	0.003	FALSE	2.826	9	1	1	1	256	27.9	9.04	0	1	100	6.64	6.44706e-16	NA	338032	NA	NA	NA	1	NA	NA	NA	338032	NA	NA	NA	207599	NA	NA	NA	1	Not Found	Not Found	Not Found	High	1
TGGT1_205550	transcript=TGGT1_205550-t26_1 | gene=TGGT1_205550 | organism=Toxoplasma_gondii_GT1 | gene_product=Protein kinase domain-containing protein [Source:UniProtKB/TrEMBL;Acc:S7W9W1] | transcript_product=AGC kinase | location=TGGT1_chrVIIa:1252214-1256447(-) | protein_length=689 | sequence_SO=chromosome | SO=protein_coding_gene | is_pseudo=false	0	FALSE	53.088	31	16	25	16	689	74.8	7.55	28.29	16	100	6.64	6.44706e-16	60193.8	1.09226e+07	20.96	16.75	2	2	51843.4	69889.2	9.69734e+06	1.23028e+07	48917	69889.2	8.48443e+06	7.55563e+06	1	1	16	16	Peak Found	Peak Found	High	High	1	Methylthio [C100; C103; C306; C460; C474]
TGGT1_277080	transcript=TGGT1_277080-t26_1 | gene=TGGT1_277080 | organism=Toxoplasma_gondii_GT1 | gene_product=Microneme protein MIC5 [Source:UniProtKB/TrEMBL;Acc:S7W847] | transcript_product=microneme protein MIC5 | location=TGGT1_chrXII:6631512-6633486(-) | protein_length=181 | sequence_SO=chromosome | SO=protein_coding_gene | is_pseudo=false	0.002	FALSE	2.876	5	1	1	1	181	19.9	4.94	2.1	1	100	6.64	6.44706e-16	NA	598358	NA	NA	NA	1	NA	NA	NA	598358	NA	NA	NA	367477	NA	NA	NA	1	Not Found	Not Found	Not Found	High	1
TGGT1_284190	transcript=TGGT1_284190-t26_1 | gene=TGGT1_284190 | organism=Toxoplasma_gondii_GT1 | gene_product=Pyruvate carboxylase [Source:UniProtKB/TrEMBL;Acc:S7UMR6] | transcript_product=pyruvate carboxylase | location=TGGT1_chrV:2598993-2613633(-) | protein_length=1391 | sequence_SO=chromosome | SO=protein_coding_gene | is_pseudo=false	0	FALSE	232.18	46	44	195	44	1391	152	6.99	293.12	44	5.991	2.58	1.54414e-09	3.24568e+07	1.94453e+08	1.23	7.6	2	2	3.21764e+07	3.27397e+07	2.052e+08	1.84269e+08	3.03601e+07	3.27397e+07	1.79534e+08	1.13167e+08	37	42	45	45	High	High	High	High	1	Phospho [S731]; Methylthio [C357; C559; C684; C705; C780; C868; C877; C1109]
TGGT1_210408	transcript=TGGT1_210408-t26_1 | gene=TGGT1_210408 | organism=Toxoplasma_gondii_GT1 | gene_product=HMG box domain-containing protein [Source:UniProtKB/TrEMBL;Acc:S7UPQ8] | transcript_product=HMG (high mobility group) box domain-containing protein | location=TGGT1_chrIX:4609915-4610199(+) | protein_length=94 | sequence_SO=chromosome | SO=protein_coding_gene | is_pseudo=false	0.007	FALSE	2.406	12	1	2	1	94	10.7	10.1	0	1	5.251	2.39	3.74399e-08	113501	596051	59.48	NA	2	1	72489	177717	NA	596051	68397.3	177717	NA	366060	1	1	NA	1	Peak Found	High	Not Found	High	1
TGGT1_291010	transcript=TGGT1_291010-t26_1 | gene=TGGT1_291010 | organism=Toxoplasma_gondii_GT1 | gene_product=hypothetical protein | transcript_product=hypothetical protein | location=TGGT1_chrIX:3850359-3851009(-) | protein_length=216 | sequence_SO=chromosome | SO=protein_coding_gene | is_pseudo=false	0.001	FALSE	3.178	6	1	2	1	216	23.3	5.19	0	1	4.424	2.15	1.61424e-06	105880	468454	NA	9.29	1	2	105880	NA	438619	500319	99903.3	NA	383758	307267	1	NA	1	1	Peak Found	Not Found	High	High	1
TGGT1_221320	transcript=TGGT1_221320-t26_1 | gene=TGGT1_221320 | organism=Toxoplasma_gondii_GT1 | gene_product=Acetyl-CoA carboxylase ACC1 [Source:UniProtKB/TrEMBL;Acc:S7VU47] | transcript_product=acetyl-CoA carboxylase ACC1 | location=TGGT1_chrII:218988-235059(-) | protein_length=2614 | sequence_SO=chromosome | SO=protein_coding_gene | is_pseudo=false	0	FALSE	535.841	52	114	562	114	2614	287.6	7.53	899.3	114	4.375	2.13	1.97009e-06	1.63782e+08	7.16485e+08	45.83	32.53	2	2	2.29227e+08	1.17021e+08	9.05543e+08	5.66899e+08	2.16288e+08	1.17021e+08	7.9228e+08	3.48156e+08	101	107	107	114	High	High	High	High	1	Methylthio [C924; C1420; C1492; C2012; C2421; C2451; C2562]; Phospho [S1757]
TGGT1_209420	transcript=TGGT1_209420-t26_1 | gene=TGGT1_209420 | organism=Toxoplasma_gondii_GT1 | gene_product=hypothetical protein | transcript_product=hypothetical protein | location=TGGT1_chrIb:1224171-1225667(-) | protein_length=250 | sequence_SO=chromosome | SO=protein_coding_gene | is_pseudo=false	0.001	FALSE	5.002	7	2	3	2	250	26.8	5.72	2.4	2	4.004	2	1.167e-05	294498	1.17918e+06	100.34	139.34	2	2	121405	714378	101613	1.36839e+07	114552	714378	88904	8.40388e+06	1	2	1	2	Peak Found	High	Peak Found	High	1
TGGT1_247350	transcript=TGGT1_247350-t26_1 | gene=TGGT1_247350 | organism=Toxoplasma_gondii_GT1 | gene_product=Thioredoxin domain-containing protein [Source:UniProtKB/TrEMBL;Acc:A0A125YFL3] | transcript_product=thioredoxin domain-containing protein | location=TGGT1_chrXII:3207736-3209852(-) | protein_length=312 | sequence_SO=chromosome | SO=protein_coding_gene | is_pseudo=false	0	FALSE	7.946	12	2	5	2	312	33.7	9.1	8.78	2	3.489	1.8	0.000148708	907248	3.16495e+06	63.62	111.8	2	2	1.4728e+06	558866	1.08251e+06	9.25338e+06	1.38967e+06	558866	947116	5.68289e+06	1	1	1	2	High	High	High	High	1
TGGT1_248630	transcript=TGGT1_248630-t26_1 | gene=TGGT1_248630 | organism=Toxoplasma_gondii_GT1 | gene_product=Actin-related protein ARP1 [Source:UniProtKB/TrEMBL;Acc:A0A125YU21] | transcript_product=actin-related protein ARP1 | location=TGGT1_chrXII:3967125-3972429(-) | protein_length=383 | sequence_SO=chromosome | SO=protein_coding_gene | is_pseudo=false	0	FALSE	5.851	10	3	4	3	383	42.3	6.7	0	3	3.461	1.79	0.000165528	225580	780751	100.68	8.56	2	2	549932	92532.4	829514	734856	518890	92532.4	725761	451306	3	2	3	3	Peak Found	Peak Found	High	High	1
TGGT1_202690	transcript=TGGT1_202690-t26_1 | gene=TGGT1_202690 | organism=Toxoplasma_gondii_GT1 | gene_product=TFIIS-type domain-containing protein [Source:UniProtKB/TrEMBL;Acc:S7UVK2] | transcript_product=DNA-directed RNA polymerase II RPB9 | location=TGGT1_chrVIIa:3001544-3004286(+) | protein_length=250 | sequence_SO=chromosome | SO=protein_coding_gene | is_pseudo=false	0.004	FALSE	2.683	5	1	1	1	250	28.2	4.48	0	1	3.055	1.61	0.00123077	391572	1.19634e+06	NA	14.3	1	2	NA	391572	1.32413e+06	1.08088e+06	NA	391572	1.15851e+06	663813	NA	1	1	1	Not Found	High	Peak Found	Peak Found	1
TGGT1_258462	transcript=TGGT1_258462-t26_1 | gene=TGGT1_258462 | organism=Toxoplasma_gondii_GT1 | gene_product=hypothetical protein | transcript_product=hypothetical protein | location=TGGT1_chrVIIb:3372709-3373945(-) | protein_length=326 | sequence_SO=chromosome | SO=protein_coding_gene | is_pseudo=false	0	FALSE	13.289	17	5	7	5	326	36.5	9.06	7.82	5	2.937	1.55	0.00224966	589357	1.73084e+06	62.42	127.76	2	2	946708	366894	7.68187e+06	389984	893270	366894	6.72105e+06	239506	4	3	5	4	High	Peak Found	High	Peak Found	1	Methylthio [C128]
TGGT1_286450	transcript=TGGT1_286450-t26_1 | gene=TGGT1_286450 | organism=Toxoplasma_gondii_GT1 | gene_product=Dense granule protein GRA5 [Source:UniProtKB/TrEMBL;Acc:A0A125YQQ2] | transcript_product=dense granule protein GRA5 | location=TGGT1_chrV:1680404-1680766(+) | protein_length=120 | sequence_SO=chromosome | SO=protein_coding_gene | is_pseudo=false	0	FALSE	17.663	28	4	9	4	120	13	5.99	14.12	4	2.877	1.52	0.00301585	1.04613e+06	3.00957e+06	57.64	67.33	2	2	1.61248e+06	678696	1.79296e+06	5.05169e+06	1521457	678696	1.56871e+06	3.10246e+06	1	1	1	3	High	High	High	High	1
TGGT1_249180	transcript=TGGT1_249180-t26_1 | gene=TGGT1_249180 | organism=Toxoplasma_gondii_GT1 | gene_product=Bifunctional dihydrofolate reductase-thymidylate synthase [Source:UniProtKB/TrEMBL;Acc:A0A125YXY2] | transcript_product=bifunctional dihydrofolate reductase-thymidylate synthase | location=TGGT1_chrXII:4294324-4300363(-) | protein_length=610 | sequence_SO=chromosome | SO=protein_coding_gene | is_pseu…	0.001	FALSE	4.418	6	2	3	2	610	68.7	7.24	0	2	2.664	1.41	0.00835538	307649	819451	35.52	11.7	2	2	397680	238001	754223	890321	375232	238001	659887	546783	2	1	2	2	High	High	High	Peak Found	1
TGGT1_260190	transcript=TGGT1_260190-t26_1 | gene=TGGT1_260190 | organism=Toxoplasma_gondii_GT1 | gene_product=Microneme protein MIC13 [Source:UniProtKB/TrEMBL;Acc:S7UYL3] | transcript_product=microneme protein MIC13 | location=TGGT1_chrVIIb:2444928-2447434(+) | protein_length=468 | sequence_SO=chromosome | SO=protein_coding_gene | is_pseudo=false	0	FALSE	28.615	23	9	17	9	468	51.4	6.33	11.35	9	2.596	1.38	0.0114959	1.27376e+06	3.30649e+06	1.01	23.56	2	2	1.28291e+06	1.26468e+06	2.79471e+06	3.912e+06	1.2105e+06	1.26468e+06	2.44515e+06	2.40252e+06	7	8	8	8	High	High	High	High	1	Methylthio [C61; C299; C386]
TGGT1_265520	transcript=TGGT1_265520-t26_1 | gene=TGGT1_265520 | organism=Toxoplasma_gondii_GT1 | gene_product=hypothetical protein | transcript_product=hypothetical protein | location=TGGT1_chrIX:1322152-1330539(+) | protein_length=512 | sequence_SO=chromosome | SO=protein_coding_gene | is_pseudo=false	0.039	FALSE	1.731	3	1	2	1	512	56.7	5.64	0	1	2.57	1.36	0.0126273	73223.5	188186	49.22	NA	2	1	105291	50922.6	188186	NA	99347.5	50922.6	164649	NA	1	1	1	NA	Peak Found	Peak Found	High	Not Found	1
TGGT1_214940	transcript=TGGT1_214940-t26_1 | gene=TGGT1_214940 | organism=Toxoplasma_gondii_GT1 | gene_product=MIC2-associated protein M2AP [Source:UniProtKB/TrEMBL;Acc:A0A125YM06] | transcript_product=MIC2-associated protein M2AP | location=TGGT1_chrX:6494811-6496996(+) | protein_length=330 | sequence_SO=chromosome | SO=protein_coding_gene | is_pseudo=false	0	FALSE	15.283	13	3	11	3	330	34.6	4.39	15.19	3	2.498	1.32	0.0178672	2.50128e+06	6.24836e+06	73.73	17.96	2	2	1.40303e+06	4.45919e+06	7.0995e+06	5.49927e+06	1.32384e+06	4.45919e+06	6.21152e+06	3.37733e+06	2	3	3	3	High	High	High	High	1
TGGT1_243800	transcript=TGGT1_243800-t26_1 | gene=TGGT1_243800 | organism=Toxoplasma_gondii_GT1 | gene_product=AMP-binding domain-containing protein [Source:UniProtKB/TrEMBL;Acc:S7VU20] | transcript_product=putative long-chain fatty acid CoA ligase | location=TGGT1_chrVI:2778396-2788707(-) | protein_length=758 | sequence_SO=chromosome | SO=protein_coding_gene | is_pseudo=false	0	FALSE	7.563	6	3	6	3	758	83.5	5.52	0	3	2.473	1.31	0.0192654	326207	806590	110.77	13.61	2	2	935720	113721	888344	732359	882902	113721	777233	449772	3	1	3	3	High	High	High	High	1	Methylthio [C679]
TGGT1_315610	transcript=TGGT1_315610-t26_1 | gene=TGGT1_315610 | organism=Toxoplasma_gondii_GT1 | gene_product=hypothetical protein | transcript_product=hypothetical protein | location=TGGT1_chrXI:4798811-4799287(+) | protein_length=158 | sequence_SO=chromosome | SO=protein_coding_gene | is_pseudo=false	0.003	FALSE	2.844	7	1	2	1	158	16	11.78	2.46	1	2.388	1.26	0.0287403	896757	2.14172e+06	1.99	NA	2	1	884210	909482	NA	2.14172e+06	834300	909482	NA	1.31532e+06	1	1	NA	1	Peak Found	High	Not Found	High	1
TGGT1_250810	transcript=TGGT1_250810-t26_1 | gene=TGGT1_250810 | organism=Toxoplasma_gondii_GT1 | gene_product=Ribosomal protein RPL35 [Source:UniProtKB/TrEMBL;Acc:A0A125YPP2] | transcript_product=ribosomal protein RPL35 | location=TGGT1_chrXII:5165995-5168354(-) | protein_length=178 | sequence_SO=chromosome | SO=protein_coding_gene | is_pseudo=false	0.008	FALSE	2.302	4	1	4	1	178	20.1	11.3	7.99	1	2.339	1.23	0.0348107	3.74582e+06	8.76334e+06	62.98	99.78	2	2	6.04691e+06	2.32039e+06	3.64141e+06	2.10897e+07	5705580	2.32039e+06	3.18595e+06	12952062	1	1	1	1	High	High	High	High	1
TGGT1_270250	transcript=TGGT1_270250-t26_1 | gene=TGGT1_270250 | organism=Toxoplasma_gondii_GT1 | gene_product=Dense granule protein GRA1 [Source:UniProtKB/TrEMBL;Acc:A0A125YRV6] | transcript_product=dense granule protein GRA1 | location=TGGT1_chrVIII:5308049-5308756(-) | protein_length=190 | sequence_SO=chromosome | SO=protein_coding_gene | is_pseudo=false	0	FALSE	18.393	35	6	17	6	190	20.1	4.28	22.84	6	2.247	1.17	0.0538777	3.51067e+06	7.88682e+06	53.77	60.4	2	2	5.23875e+06	2.35262e+06	4.99732e+06	1.24471e+07	4.94304e+06	2.35262e+06	4.37227e+06	7.64427e+06	6	5	6	6	High	High	High	High	1
TGGT1_233140	transcript=TGGT1_233140-t26_1 | gene=TGGT1_233140 | organism=Toxoplasma_gondii_GT1 | gene_product=Deoxyuridine 5'-triphosphate nucleotidohydrolase [Source:UniProtKB/TrEMBL;Acc:S7WJC8] | transcript_product=putative deoxyuridine 5'-triphosphate nucleotidohydrolase | location=TGGT1_chrVIII:2445123-2446378(-) | protein_length=170 | sequence_SO=chromosome | SO=protein_coding_gene | is_pseudo=false	0.001	FALSE	3.715	12	2	5	2	170	18.2	6.2	1.89	2	2.218	1.15	0.0599786	335562	744209	77.78	45.23	2	2	622742	180816	534248	1.03668e+06	587591	180816	467426	636671	2	1	2	2	High	Peak Found	High	High	1
TGGT1_204530	transcript=TGGT1_204530-t26_1 | gene=TGGT1_204530 | organism=Toxoplasma_gondii_GT1 | gene_product=Microneme protein MIC11 [Source:UniProtKB/TrEMBL;Acc:A0A125YJF7] | transcript_product=microneme protein MIC11 | location=TGGT1_chrVIIa:1632334-1633282(-) | protein_length=204 | sequence_SO=chromosome | SO=protein_coding_gene | is_pseudo=false	0	FALSE	5.732	14	3	7	3	204	22.4	5.19	1.97	3	2.204	1.14	0.0637731	1.44965e+06	3.19443e+06	31.93	65.77	2	2	1.82409e+06	1.15207e+06	1.93034e+06	5.28632e+06	1.72112e+06	1.15207e+06	1.6889e+06	3.24655e+06	3	3	3	3	High	High	High	High	1
TGGT1_300280	transcript=TGGT1_300280-t26_1 | gene=TGGT1_300280 | organism=Toxoplasma_gondii_GT1 | gene_product=Sm domain-containing protein [Source:UniProtKB/TrEMBL;Acc:S7UFN1] | transcript_product=LSM domain-containing protein | location=TGGT1_chrXII:70960-73566(-) | protein_length=169 | sequence_SO=chromosome | SO=protein_coding_gene | is_pseudo=false	0.007	FALSE	2.423	7	1	1	1	169	17.9	10.92	0	1	2.192	1.13	0.0659212	152892	335134	NA	NA	1	1	NA	152892	NA	335134	NA	152892	NA	205820	NA	1	NA	1	Not Found	Peak Found	Not Found	High	1
TGGT1_216560	transcript=TGGT1_216560-t26_1 | gene=TGGT1_216560 | organism=Toxoplasma_gondii_GT1 | gene_product=Ribosomal RNA-processing protein 8 [Source:UniProtKB/TrEMBL;Acc:S7ULR7] | transcript_product=methyltransferase domain-containing protein | location=TGGT1_chrXI:6001736-6005776(-) | protein_length=532 | sequence_SO=chromosome | SO=protein_coding_gene | is_pseudo=false	0	FALSE	5.799	4	2	3	2	532	58.5	10.04	4.62	2	2.13	1.09	0.086814	469922	1.00099e+06	17.43	25.8	2	2	415157	531912	1.20378e+06	832357	391723	531912	1.05322e+06	511185	1	1	2	2	Peak Found	Peak Found	High	Peak Found	1
TGGT1_264660	transcript=TGGT1_264660-t26_1 | gene=TGGT1_264660 | organism=Toxoplasma_gondii_GT1 | gene_product=SAG-related sequence SRS44 [Source:UniProtKB/TrEMBL;Acc:S7VP87] | transcript_product=SAG-related sequence SRS44 | location=TGGT1_chrIX:1955976-1963333(+) | protein_length=2359 | sequence_SO=chromosome | SO=protein_coding_gene | is_pseudo=false	0	FALSE	368.134	42	76	355	76	2359	251.8	8.02	572.66	76	2.115	1.08	0.0916595	9.61179e+07	2.03305e+08	114.6	108.39	2	2	2.96938e+08	3.11131e+07	5.59119e+08	7.39247e+07	2.80177e+08	3.11131e+07	4.89187e+08	4.54002e+07	72	63	75	70	High	High	High	High	1	Methylthio [C17; C95; C98; C241; C244; C254; C311; C422; C533; C536; C695; C731; C764; C793; C841; C844; C886; C997; C1000; C1065; C1094; C1155; C1183; C1290; C1293; C1361; C1438; C1441; C1473; C1592; C1645; C1755; C1818; C1866; C1869; C1918; C1944; C2004; C2321; C2322]
TGGT1_244440	transcript=TGGT1_244440-t26_1 | gene=TGGT1_244440 | organism=Toxoplasma_gondii_GT1 | gene_product=Nucleoside transporter protein [Source:UniProtKB/TrEMBL;Acc:A0A125YNC8] | transcript_product=nucleoside transporter protein | location=TGGT1_chrVI:3175201-3176902(-) | protein_length=462 | sequence_SO=chromosome | SO=protein_coding_gene | is_pseudo=false	0.007	FALSE	2.464	2	1	3	1	462	50.9	6.54	6.93	1	2.106	1.07	0.0943325	266564	561509	113.25	88.52	2	2	801512	88652.6	1.17071e+06	269316	756270	88652.6	1.02429e+06	165398	1	1	1	1	Peak Found	High	High	High	1
TGGT1_219660	transcript=TGGT1_219660-t26_1 | gene=TGGT1_219660 | organism=Toxoplasma_gondii_GT1 | gene_product=hypothetical protein | transcript_product=hypothetical protein | location=TGGT1_chrXII:687294-702774(-) | protein_length=4903 | sequence_SO=chromosome | SO=protein_coding_gene | is_pseudo=false	0.025	FALSE	1.905	0	1	1	1	4903	542.3	9.33	0	1	2.101	1.07	0.0949251	107557	225957	NA	NA	1	1	107557	NA	225957	NA	101486	NA	197695	NA	1	NA	1	NA	Peak Found	Not Found	High	Not Found	1	Biotin [K1335]
TGGT1_219720	transcript=TGGT1_219720-t26_1 | gene=TGGT1_219720 | organism=Toxoplasma_gondii_GT1 | gene_product=Putative Ras-related protein Rab-5C [Source:UniProtKB/TrEMBL;Acc:S7V1U0] | transcript_product=putative Ras-related protein Rab-5C | location=TGGT1_chrXII:628976-629707(+) | protein_length=243 | sequence_SO=chromosome | SO=protein_coding_gene | is_pseudo=false	0	FALSE	5.997	9	2	7	1	243	25.7	7.97	13.54	2	2.092	1.06	0.0969714	177144	370581	53.57	NA	2	1	263906	118906	370581	NA	249010	118906	324230	NA	1	1	1	NA	Peak Found	Peak Found	High	Not Found	1
TGGT1_208740	transcript=TGGT1_208740-t26_1 | gene=TGGT1_208740 | organism=Toxoplasma_gondii_GT1 | gene_product=Putative microneme protein [Source:UniProtKB/TrEMBL;Acc:S7UIK4] | transcript_product=putative microneme protein | location=TGGT1_chrIb:855333-858141(-) | protein_length=609 | sequence_SO=chromosome | SO=protein_coding_gene | is_pseudo=false	0	FALSE	5.802	4	2	2	2	609	66.3	7.8	1.68	2	2.086	1.06	0.0990106	154539	322327	88.21	87.68	2	2	321024	74394.3	665529	156108	302904	74394.3	582287	95872.5	2	1	2	1	Peak Found	Peak Found	High	Peak Found	1	Methylthio [C237]
TGGT1_201390	transcript=TGGT1_201390-t26_1 | gene=TGGT1_201390 | organism=Toxoplasma_gondii_GT1 | gene_product=hypothetical protein | transcript_product=hypothetical protein | location=TGGT1_chrVIIa:3811236-3811562(-) | protein_length=108 | sequence_SO=chromosome | SO=protein_coding_gene | is_pseudo=false	0.001	FALSE	4.247	14	1	1	1	108	11.3	10.98	0	1	2.039	1.03	0.123833	85365	174090	3.53	77.12	2	2	83262	87521.1	94428.6	320957	78562.2	87521.1	82617.8	197113	1	1	1	1	Peak Found	Peak Found	Peak Found	High	1
TGGT1_290040	transcript=TGGT1_290040-t26_1 | gene=TGGT1_290040 | organism=Toxoplasma_gondii_GT1 | gene_product=Putative macrophage migration inhibitory factor [Source:UniProtKB/TrEMBL;Acc:A0A125YP70] | transcript_product=putative macrophage migration inhibitory factor | location=TGGT1_chrIX:3406712-3408548(+) | protein_length=116 | sequence_SO=chromosome | SO=protein_coding_gene | is_pseudo=false	0	FALSE	12.267	38	4	6	4	116	12.2	8.6	3.57	4	2.022	1.02	0.132473	602044	1.2171e+06	67.91	84.17	2	2	1.01596e+06	356763	613166	2.41588e+06	958614	356763	536473	1.48369e+06	4	3	3	4	High	Peak Found	High	High	1	Methylthio [C58; C75]
TGGT1_238100	transcript=TGGT1_238100-t26_1 | gene=TGGT1_238100 | organism=Toxoplasma_gondii_GT1 | gene_product=GOLD domain-containing protein [Source:UniProtKB/TrEMBL;Acc:S7URN6] | transcript_product=transmembrane protein | location=TGGT1_chrVI:63589-66092(-) | protein_length=240 | sequence_SO=chromosome | SO=protein_coding_gene | is_pseudo=false	0.01	FALSE	2.223	4	1	1	1	240	26.9	7.68	0	1	1.998	1	0.143784	145349	290424	78.24	NA	2	1	271028	77949.3	290424	NA	255730	77949.3	254099	NA	1	1	1	NA	High	Peak Found	Peak Found	Not Found	1
TGGT1_231080	transcript=TGGT1_231080-t26_1 | gene=TGGT1_231080 | organism=Toxoplasma_gondii_GT1 | gene_product=Ribosomal protein RPL38 [Source:UniProtKB/TrEMBL;Acc:A0A125YR20] | transcript_product=ribosomal protein RPL38 | location=TGGT1_chrVIII:1225571-1225825(+) | protein_length=84 | sequence_SO=chromosome | SO=protein_coding_gene | is_pseudo=false	0	FALSE	13.522	27	3	31	3	84	9.6	10.68	53.85	3	1.983	0.99	0.153769	3.79461e+06	7.52621e+06	18.86	36.18	2	2	4.33935e+06	3.31826e+06	5.79342e+06	9.77727e+06	4.09441e+06	3.31826e+06	5.0688e+06	6.00463e+06	2	3	2	3	High	High	High	High	1
TGGT1_201780	transcript=TGGT1_201780-t26_1 | gene=TGGT1_201780 | organism=Toxoplasma_gondii_GT1 | gene_product=VWFA domain-containing protein [Source:UniProtKB/TrEMBL;Acc:A0A125YK19] | transcript_product=microneme protein MIC2 | location=TGGT1_chrVIIa:3693727-3696991(-) | protein_length=769 | sequence_SO=chromosome | SO=protein_coding_gene | is_pseudo=false	0	FALSE	11.368	7	4	8	4	769	82.6	4.83	5.54	4	1.978	0.98	0.156544	740885	1.4654e+06	69.78	52.19	2	2	1.27206e+06	431512	994821	2.15858e+06	1.20026e+06	431512	870392	1.32567e+06	3	3	2	4	High	Peak Found	High	High	1	Methylthio [C319; C509; C610; C612]
TGGT1_310030	transcript=TGGT1_310030-t26_1 | gene=TGGT1_310030 | organism=Toxoplasma_gondii_GT1 | gene_product=C-CAP/cofactor C-like domain-containing protein [Source:UniProtKB/TrEMBL;Acc:A0A125YN73] | transcript_product=putative cyclase-associated protein | location=TGGT1_chrXI:977166-978111(-) | protein_length=203 | sequence_SO=chromosome | SO=protein_coding_gene | is_pseudo=false	0	FALSE	12.705	23	4	8	4	203	22.5	6.76	4.19	4	1.967	0.98	0.161947	901305	1.77317e+06	8.03	8.8	2	2	851508	954014	1.66612e+06	1.8871e+06	803443	954014	1.45773e+06	1.15895e+06	3	4	4	4	High	High	High	High	1	Methylthio [C99; C137]
TGGT1_310790	transcript=TGGT1_310790-t26_1 | gene=TGGT1_310790 | organism=Toxoplasma_gondii_GT1 | gene_product=hypothetical protein | transcript_product=hypothetical protein | location=TGGT1_chrXI:1556574-1558606(+) | protein_length=219 | sequence_SO=chromosome | SO=protein_coding_gene | is_pseudo=false	0	FALSE	7.712	17	2	3	2	219	24.7	4.92	2.68	2	1.935	0.95	0.188295	366811	709742	62.74	44.28	2	2	590873	227714	513347	981273	557521	227714	449139	602640	2	2	2	2	High	Peak Found	Peak Found	High	1
TGGT1_243570	transcript=TGGT1_243570-t26_1 | gene=TGGT1_243570 | organism=Toxoplasma_gondii_GT1 | gene_product=40S ribosomal protein S26 [Source:UniProtKB/TrEMBL;Acc:A0A125YVY8] | transcript_product=ribosomal protein RPS26 | location=TGGT1_chrVI:2643618-2644858(-) | protein_length=112 | sequence_SO=chromosome | SO=protein_coding_gene | is_pseudo=false	0	FALSE	8.031	19	2	11	2	112	12.7	10.92	20.93	2	1.928	0.95	0.193552	1.15583e+07	2.22808e+07	7.73	23.51	2	2	1.22081e+07	1.09432e+07	1.88386e+07	2.63519e+07	1.1519e+07	1.09432e+07	16482367	16183789	2	2	2	2	High	High	High	High	1
TGGT1_214770	transcript=TGGT1_214770-t26_1 | gene=TGGT1_214770 | organism=Toxoplasma_gondii_GT1 | gene_product=Putative small GTP binding protein rab1a [Source:UniProtKB/TrEMBL;Acc:S7W5S1] | transcript_product=putative small GTP binding protein rab1a | location=TGGT1_chrX:6376684-6380380(+) | protein_length=202 | sequence_SO=chromosome | SO=protein_coding_gene | is_pseudo=false	0	FALSE	15.257	28	5	18	2	202	22.9	7.72	34.89	5	1.92	0.94	0.199758	302547	580805	104.91	9.9	2	2	785830	116481	541478	622988	741473	116481	473752	382603	2	1	1	2	High	Peak Found	Peak Found	High	1
TGGT1_295350	transcript=TGGT1_295350-t26_1 | gene=TGGT1_295350 | organism=Toxoplasma_gondii_GT1 | gene_product=Nucleoside diphosphate kinase [Source:UniProtKB/TrEMBL;Acc:A0A125YXT7] | transcript_product=putative nucleoside diphosphate kinase | location=TGGT1_chrIa:1794066-1795458(-) | protein_length=155 | sequence_SO=chromosome | SO=protein_coding_gene | is_pseudo=false	0	FALSE	14.422	28	4	13	4	155	17.6	6.79	6.42	4	1.911	0.93	0.204823	1.765e+06	3.37295e+06	28.84	77.62	2	2	2.1705e+06	1.43525e+06	1.82032e+06	6.24988e+06	2.04799e+06	1.43525e+06	1.59264e+06	3.83831e+06	4	4	4	4	High	High	High	High	1	Methylthio [C111]
TGGT1_297880	transcript=TGGT1_297880-t26_1 | gene=TGGT1_297880 | organism=Toxoplasma_gondii_GT1 | gene_product=Dense granule protein DG32 [Source:UniProtKB/TrEMBL;Acc:A0A125YME3] | transcript_product=dense granule protein DG32 | location=TGGT1_chrII:2069382-2070384(-) | protein_length=219 | sequence_SO=chromosome | SO=protein_coding_gene | is_pseudo=false	0	FALSE	24.503	37	5	15	5	219	24.1	9.57	19.33	5	1.904	0.93	0.208076	2.28969e+06	4.35991e+06	85.29	81.83	2	2	4.60181e+06	1.13926e+06	8.43899e+06	2.2525e+06	4342054	1.13926e+06	7.38347e+06	1.38336e+06	4	4	5	4	High	High	High	High	1
TGGT1_234380	transcript=TGGT1_234380-t26_1 | gene=TGGT1_234380 | organism=Toxoplasma_gondii_GT1 | gene_product=hypothetical protein | transcript_product=hypothetical protein | location=TGGT1_chrX:4225477-4226948(+) | protein_length=347 | sequence_SO=chromosome | SO=protein_coding_gene | is_pseudo=false	0	FALSE	21.234	22	7	19	7	347	38.6	7.12	5.21	7	1.861	0.9	0.24908	1.65357e+06	3.07785e+06	68.56	20.87	2	2	2.80713e+06	974058	2.65273e+06	3.5711e+06	2.64868e+06	974058	2.32094e+06	2.19316e+06	6	4	6	6	High	High	High	High	1
TGGT1_209720	transcript=TGGT1_209720-t26_1 | gene=TGGT1_209720 | organism=Toxoplasma_gondii_GT1 | gene_product=DUF4149 domain-containing protein [Source:UniProtKB/TrEMBL;Acc:A0A125YSM3] | transcript_product=hypothetical protein | location=TGGT1_chrIb:1427445-1428943(+) | protein_length=218 | sequence_SO=chromosome | SO=protein_coding_gene | is_pseudo=false	0.001	FALSE	5.458	10	1	2	1	218	23.4	8.12	4.84	1	1.822	0.87	0.284376	189757	345813	NA	44.57	1	2	NA	189757	479216	249546	NA	189757	419278	153257	NA	1	1	1	High	Peak Found	High	Peak Found	1
TGGT1_285870	transcript=TGGT1_285870-t26_1 | gene=TGGT1_285870 | organism=Toxoplasma_gondii_GT1 | gene_product=SAG domain-containing protein [Source:UniProtKB/TrEMBL;Acc:S7UNS7] | transcript_product=SAG-related sequence SRS20A | location=TGGT1_chrV:2015649-2017548(-) | protein_length=328 | sequence_SO=chromosome | SO=protein_coding_gene | is_pseudo=false	0	FALSE	19.28	23	5	11	5	328	34.9	7.77	13.1	5	1.821	0.86	0.284376	911144	1.65927e+06	108.94	68.8	2	2	2.52967e+06	328179	975217	2.82315e+06	2.38688e+06	328179	853240	1.73381e+06	5	2	4	5	High	Peak Found	High	High	1	Methylthio [C63; C214]
TGGT1_290670	transcript=TGGT1_290670-t26_1 | gene=TGGT1_290670 | organism=Toxoplasma_gondii_GT1 | gene_product=CYTOSOL_AP domain-containing protein [Source:UniProtKB/TrEMBL;Acc:S7UP88] | transcript_product=leucyl aminopeptidase LAP | location=TGGT1_chrIX:3637150-3642271(+) | protein_length=781 | sequence_SO=chromosome | SO=protein_coding_gene | is_pseudo=false	0	FALSE	54.957	26	18	39	18	781	83.1	8.88	40.65	18	1.805	0.85	0.304202	3.67255e+06	6.62802e+06	32.43	32.17	2	2	4.63832e+06	2.90787e+06	5.25831e+06	8.35451e+06	4.3765e+06	2.90787e+06	4.60062e+06	5.13085e+06	13	12	12	14	High	High	High	High	1	Methylthio [C679; C712]
TGGT1_293870	transcript=TGGT1_293870-t26_1 | gene=TGGT1_293870 | organism=Toxoplasma_gondii_GT1 | gene_product=Thioredoxin [Source:UniProtKB/TrEMBL;Acc:A0A125YIY2] | transcript_product=putative thioredoxin | location=TGGT1_chrIa:604538-605891(+) | protein_length=106 | sequence_SO=chromosome | SO=protein_coding_gene | is_pseudo=false	0	FALSE	8.127	27	2	4	2	106	12	5.11	1.74	2	1.803	0.85	0.304472	481656	868359	16.22	58.6	2	2	540448	429260	558755	1.34951e+06	509942	429260	488868	828791	2	2	2	2	High	Peak Found	High	High	1
TGGT1_203310	transcript=TGGT1_203310-t26_1 | gene=TGGT1_203310 | organism=Toxoplasma_gondii_GT1 | gene_product=Dense granule protein GRA7 [Source:UniProtKB/TrEMBL;Acc:A0A125YVB8] | transcript_product=dense granule protein GRA7 | location=TGGT1_chrVIIa:2502941-2503651(+) | protein_length=236 | sequence_SO=chromosome | SO=protein_coding_gene | is_pseudo=false	0	FALSE	75.914	49	10	59	10	236	25.8	5.22	120.17	10	1.785	0.84	0.320087	1.53544e+07	2.74077e+07	59.17	11.69	2	2	2.3979e+07	9.83184e+06	2.9776e+07	2.52277e+07	2.26254e+07	9.83184e+06	2.60517e+07	1.54934e+07	11	10	10	11	High	High	High	High	1	Phospho [T90]
TGGT1_297430	transcript=TGGT1_297430-t26_1 | gene=TGGT1_297430 | organism=Toxoplasma_gondii_GT1 | gene_product=FoP_duplication domain-containing protein [Source:UniProtKB/TrEMBL;Acc:S7UK03] | transcript_product=hypothetical protein | location=TGGT1_chrII:1749482-1752364(+) | protein_length=248 | sequence_SO=chromosome | SO=protein_coding_gene | is_pseudo=false	0	FALSE	10.808	18	3	4	3	248	25.3	11.63	3.91	3	1.779	0.83	0.32679	561477	999091	54.66	82.91	2	2	844085	373489	510247	1.95627e+06	796440	373489	446427	1.20143e+06	3	2	2	3	High	Peak Found	Peak Found	High	1
TGGT1_247510	transcript=TGGT1_247510-t26_1 | gene=TGGT1_247510 | organism=Toxoplasma_gondii_GT1 | gene_product=FBPase domain-containing protein [Source:UniProtKB/TrEMBL;Acc:A0A125YGG2] | transcript_product=fructose-bisphospatase II | location=TGGT1_chrXII:3317257-3321142(+) | protein_length=381 | sequence_SO=chromosome | SO=protein_coding_gene | is_pseudo=false	0	FALSE	29.213	30	9	26	9	381	42.4	6.61	16.31	9	1.771	0.82	0.335357	7.5329e+06	1.33386e+07	33.17	24.44	2	2	5.93133e+06	9.56693e+06	1.58826e+07	1.12021e+07	5.59653e+06	9.56693e+06	1.38961e+07	6.87966e+06	8	9	9	9	High	High	High	High	1	Methylthio [C262; C368]
TGGT1_254900	transcript=TGGT1_254900-t26_1 | gene=TGGT1_254900 | organism=Toxoplasma_gondii_GT1 | gene_product=Proteasome subunit beta [Source:UniProtKB/TrEMBL;Acc:A0A125YJ26] | transcript_product=putative proteasome subunit beta type 2 | location=TGGT1_chrIII:1997522-1998441(+) | protein_length=191 | sequence_SO=chromosome | SO=protein_coding_gene | is_pseudo=false	0.047	FALSE	1.669	4	1	1	1	191	22	7.88	0	1	1.76	0.82	0.343237	125058	220161	39.66	41.73	2	2	166826	93746.5	162429	298412	157410	93746.5	142113	183267	1	1	1	1	Peak Found	Peak Found	Peak Found	High	1
TGGT1_267400	transcript=TGGT1_267400-t26_1 | gene=TGGT1_267400 | organism=Toxoplasma_gondii_GT1 | gene_product=Ribosomal protein RPL32 [Source:UniProtKB/TrEMBL;Acc:A0A125YTP3] | transcript_product=ribosomal protein RPL32 | location=TGGT1_chrIX:508439-508944(-) | protein_length=134 | sequence_SO=chromosome | SO=protein_coding_gene | is_pseudo=false	0	FALSE	33.006	48	6	42	6	134	15.6	11.03	58.69	6	1.756	0.81	0.347663	2.99547e+07	5.26143e+07	22.84	31.94	2	2	3.52554e+07	2.5451e+07	4.18133e+07	6.62055e+07	3.32654e+07	2.5451e+07	3.65834e+07	4.06596e+07	6	6	6	6	High	High	High	High	1
TGGT1_249270	transcript=TGGT1_249270-t26_1 | gene=TGGT1_249270 | organism=Toxoplasma_gondii_GT1 | gene_product=putative protein disulfide isomerase-related protein (provisional) | transcript_product=putative protein disulfide isomerase-related protein (provisional) | location=TGGT1_chrXII:4348987-4354246(+) | protein_length=547 | sequence_SO=chromosome | SO=protein_coding_gene | is_pseudo=false	0	FALSE	6.434	6	3	6	3	547	59.8	7.84	1.76	3	1.753	0.81	0.348759	968523	1.69765e+06	40.98	13.02	2	2	1.30515e+06	718718	1.54797e+06	1.8618e+06	1.23148e+06	718718	1.35436e+06	1.14341e+06	2	2	2	3	High	High	High	High	1
TGGT1_308840	transcript=TGGT1_308840-t26_1 | gene=TGGT1_308840 | organism=Toxoplasma_gondii_GT1 | gene_product=SAG-related sequence SRS51 [Source:UniProtKB/TrEMBL;Acc:S7W107] | transcript_product=SAG-related sequence SRS51 | location=TGGT1_chrXI:258885-259967(+) | protein_length=360 | sequence_SO=chromosome | SO=protein_coding_gene | is_pseudo=false	0	FALSE	7.797	12	2	5	2	360	38	6.2	0	2	1.743	0.8	0.353464	412665	719305	87.88	51.53	2	2	854038	199396	490951	1.05387e+06	805831	199396	429545	647226	2	1	2	2	High	Peak Found	High	High	1	Methylthio [C214]
TGGT1_289970	transcript=TGGT1_289970-t26_1 | gene=TGGT1_289970 | organism=Toxoplasma_gondii_GT1 | gene_product=hypothetical protein | transcript_product=hypothetical protein | location=TGGT1_chrIX:3366173-3367777(+) | protein_length=232 | sequence_SO=chromosome | SO=protein_coding_gene | is_pseudo=false	0	FALSE	11.191	11	2	12	2	232	24.5	11.66	23.1	2	1.742	0.8	0.353464	2.0768e+06	3.61761e+06	6.61	5.78	2	2	2.17619e+06	1.98196e+06	3.76871e+06	3.47256e+06	2.05335e+06	1.98196e+06	3.29733e+06	2132645	2	2	2	2	High	High	High	High	1
TGGT1_247520	transcript=TGGT1_247520-t26_1 | gene=TGGT1_247520 | organism=Toxoplasma_gondii_GT1 | gene_product=hypothetical protein | transcript_product=hypothetical protein | location=TGGT1_chrXII:3323216-3323986(-) | protein_length=256 | sequence_SO=chromosome | SO=protein_coding_gene | is_pseudo=false	0	FALSE	6.317	11	1	4	1	256	26.3	11.06	7.19	1	1.741	0.8	0.353464	663750	1.15585e+06	33.67	54.7	2	2	846133	520679	768604	1.73819e+06	798372	520679	672469	1.0675e+06	1	1	1	1	High	High	High	High	1
TGGT1_316310	transcript=TGGT1_316310-t26_1 | gene=TGGT1_316310 | organism=Toxoplasma_gondii_GT1 | gene_product=Superoxide dismutase [Source:UniProtKB/TrEMBL;Acc:A0A125YQN9] | transcript_product=superoxide dismutase | location=TGGT1_chrXI:5175968-5177674(-) | protein_length=201 | sequence_SO=chromosome | SO=protein_coding_gene | is_pseudo=false	0	FALSE	14.935	20	3	11	3	201	22.5	7.06	7.56	3	1.732	0.79	0.368044	1.54532e+06	2.67663e+06	23.18	76.84	2	2	1.82327e+06	1.30975e+06	1.45603e+06	4.92047e+06	1.72035e+06	1.30975e+06	1.27391e+06	3.02186e+06	3	4	3	4	High	High	High	High	1
TGGT1_316250	transcript=TGGT1_316250-t26_1 | gene=TGGT1_316250 | organism=Toxoplasma_gondii_GT1 | gene_product=hypothetical protein | transcript_product=hypothetical protein | location=TGGT1_chrXI:5154312-5155496(-) | protein_length=394 | sequence_SO=chromosome | SO=protein_coding_gene | is_pseudo=false	0	FALSE	11.65	14	4	6	4	394	44.8	4.93	3.58	4	1.711	0.78	0.398477	399298	683329	120.87	91.68	2	2	1.42666e+06	111757	1.47917e+06	315676	1.34613e+06	111757	1.29416e+06	193870	4	1	4	2	High	Peak Found	High	Peak Found	1
TGGT1_211420	transcript=TGGT1_211420-t26_1 | gene=TGGT1_211420 | organism=Toxoplasma_gondii_GT1 | gene_product=RRM domain-containing protein [Source:UniProtKB/TrEMBL;Acc:S7VTD0] | transcript_product=RNA recognition motif-containing protein | location=TGGT1_chrIV:1661239-1664919(-) | protein_length=189 | sequence_SO=chromosome | SO=protein_coding_gene | is_pseudo=false	0.001	FALSE	3.471	5	1	2	1	189	22.8	7.03	0	1	1.705	0.77	0.406886	103545	176586	64.81	72.49	2	2	169888	63109.2	100246	311062	160299	63109.2	87707.6	191036	1	1	1	1	High	Peak Found	Peak Found	High	1
TGGT1_211680	transcript=TGGT1_211680-t26_1 | gene=TGGT1_211680 | organism=Toxoplasma_gondii_GT1 | gene_product=Protein disulfide-isomerase [Source:UniProtKB/TrEMBL;Acc:A0A125YQI9] | transcript_product=protein disulfide isomerase | location=TGGT1_chrIV:1556190-1558014(+) | protein_length=471 | sequence_SO=chromosome | SO=protein_coding_gene | is_pseudo=false	0	FALSE	42.968	30	12	37	12	471	52.8	5.22	40.97	12	1.703	0.77	0.409052	7.03807e+06	1.19857e+07	44.87	49.26	2	2	9.77588e+06	5.06701e+06	8.3326e+06	1.72404e+07	9.22406e+06	5.06701e+06	7.29039e+06	1.0588e+07	11	12	12	12	High	High	High	High	1
TGGT1_229670	transcript=TGGT1_229670-t26_1 | gene=TGGT1_229670 | organism=Toxoplasma_gondii_GT1 | gene_product=Ribosomal protein RPS23 [Source:UniProtKB/TrEMBL;Acc:A0A125YRX1] | transcript_product=ribosomal protein RPS23 | location=TGGT1_chrVIII:368147-371053(+) | protein_length=143 | sequence_SO=chromosome | SO=protein_coding_gene | is_pseudo=false	0	FALSE	24.139	43	5	49	5	143	15.8	10.83	75.54	5	1.691	0.76	0.42905	5.64871e+07	9.5497e+07	12.22	15.81	2	2	6.15966e+07	5.18014e+07	8.53568e+07	1.06842e+08	5.81197e+07	5.18014e+07	7.46807e+07	6.5616e+07	5	5	4	5	High	High	High	High	1
TGGT1_245670	transcript=TGGT1_245670-t26_1 | gene=TGGT1_245670 | organism=Toxoplasma_gondii_GT1 | gene_product=Pyruvate dehydrogenase E1 component subunit alpha [Source:UniProtKB/TrEMBL;Acc:S7V1R5] | transcript_product=pyruvate dehydrogenase complex subunit PDH-E1Alpha | location=TGGT1_chrXII:2396583-2400897(+) | protein_length=635 | sequence_SO=chromosome | SO=protein_coding_gene | is_pseudo=false	0	FALSE	11.413	8	4	11	4	635	67.4	8.7	9.59	4	1.689	0.76	0.42905	1.90787e+07	3.22333e+07	9.74	53.54	2	2	2.04406e+07	1.78076e+07	2.1641e+07	4.80101e+07	1.92868e+07	1.78076e+07	1.89342e+07	2.9485e+07	4	4	4	4	High	High	High	High	1
TGGT1_254620	transcript=TGGT1_254620-t26_1 | gene=TGGT1_254620 | organism=Toxoplasma_gondii_GT1 | gene_product=Ribosomal protein RPL39 [Source:UniProtKB/TrEMBL;Acc:S7UM53] | transcript_product=ribosomal protein RPL39 | location=TGGT1_chrIII:1840786-1841847(-) | protein_length=68 | sequence_SO=chromosome | SO=protein_coding_gene | is_pseudo=false	0	FALSE	6.534	15	1	21	1	68	8.3	12.02	47.38	1	1.688	0.76	0.429877	1.37299e+07	2.31727e+07	13.27	32.32	2	2	1.24966e+07	1.50849e+07	1.83631e+07	2.92421e+07	1.17912e+07	1.50849e+07	16066316	1.79588e+07	1	1	1	1	High	High	High	High	1
TGGT1_227620	transcript=TGGT1_227620-t26_1 | gene=TGGT1_227620 | organism=Toxoplasma_gondii_GT1 | gene_product=Dense granule protein GRA2 [Source:UniProtKB/TrEMBL;Acc:S7UXS8] | transcript_product=dense granule protein GRA2 | location=TGGT1_chrX:779857-780655(-) | protein_length=185 | sequence_SO=chromosome | SO=protein_coding_gene | is_pseudo=false	0	FALSE	23.716	28	6	23	6	185	19.8	9	36.7	6	1.68	0.75	0.437574	1.86743e+07	3.13773e+07	41.73	9.95	2	2	2.53117e+07	1.37773e+07	3.36692e+07	2.92415e+07	2.38829e+07	1.37773e+07	2.94579e+07	1.79584e+07	4	4	4	5	High	High	High	High	1
TGGT1_218560	transcript=TGGT1_218560-t26_1 | gene=TGGT1_218560 | organism=Toxoplasma_gondii_GT1 | gene_product=Acetyl-coA carboxylase ACC2 [Source:UniProtKB/TrEMBL;Acc:S7V1W6] | transcript_product=acetyl-coA carboxylase ACC2 | location=TGGT1_chrXII:1367542-1396474(-) | protein_length=3400 | sequence_SO=chromosome | SO=protein_coding_gene | is_pseudo=false	0	FALSE	47.773	8	19	22	19	3400	365	6.84	5.55	19	1.675	0.74	0.438114	3.29851e+06	5.52625e+06	75.58	57.43	2	2	5.988e+06	1.817e+06	8.50319e+06	3.59153e+06	5.65e+06	1.817e+06	7.43964e+06	2.20571e+06	14	14	17	15	High	High	High	High	1	Methylthio [C489]
TGGT1_211030	transcript=TGGT1_211030-t26_1 | gene=TGGT1_211030 | organism=Toxoplasma_gondii_GT1 | gene_product=hypothetical protein | transcript_product=hypothetical protein | location=TGGT1_chrIV:1889471-1891938(-) | protein_length=191 | sequence_SO=chromosome | SO=protein_coding_gene | is_pseudo=false	0.001	FALSE	5.083	12	2	2	2	191	22.2	5.82	2.2	2	1.675	0.74	0.438114	247719	414825	42.84	55.81	2	2	338664	181196	273302	629633	319548	181196	239118	386684	1	1	1	1	High	Peak Found	Peak Found	High	1
TGGT1_301390	transcript=TGGT1_301390-t26_1 | gene=TGGT1_301390 | organism=Toxoplasma_gondii_GT1 | gene_product=Ribosome biogenesis protein BOP1 homolog [Source:UniProtKB/TrEMBL;Acc:S7UGJ2] | transcript_product=putative ribosome biogenesis protein BOP1 | location=TGGT1_chrIV:2318679-2327410(+) | protein_length=1052 | sequence_SO=chromosome | SO=protein_coding_gene | is_pseudo=false	0.001	FALSE	4.002	1	1	4	1	1052	117.3	4.98	5.54	1	1.671	0.74	0.438114	711933	1.18959e+06	50.66	41.79	2	2	489380	1.0357e+06	877221	1.61319e+06	461756	1.0357e+06	767501	990724	1	1	1	1	High	High	High	High	1	Methylthio [C497; C503]
TGGT1_258150	transcript=TGGT1_258150-t26_1 | gene=TGGT1_258150 | organism=Toxoplasma_gondii_GT1 | gene_product=Proteasome subunit alpha type [Source:UniProtKB/TrEMBL;Acc:A0A125YZI1] | transcript_product=putative proteasome subunit alpha type 7 | location=TGGT1_chrVIIb:3513384-3517343(-) | protein_length=245 | sequence_SO=chromosome | SO=protein_coding_gene | is_pseudo=false	0.001	FALSE	3.567	11	1	2	1	245	27.1	6.64	0	1	1.647	0.72	0.475949	91914.3	151426	NA	NA	1	1	91914.3	NA	NA	151426	86726.1	NA	NA	92997.1	1	NA	NA	1	High	Not Found	Not Found	Peak Found	1
TGGT1_205340	transcript=TGGT1_205340-t26_1 | gene=TGGT1_205340 | organism=Toxoplasma_gondii_GT1 | gene_product=40S ribosomal protein S12 [Source:UniProtKB/TrEMBL;Acc:A0A125YN62] | transcript_product=ribosomal protein RPS12 | location=TGGT1_chrVIIa:1379775-1380954(+) | protein_length=142 | sequence_SO=chromosome | SO=protein_coding_gene | is_pseudo=false	0	FALSE	6.283	16	2	6	2	142	15.4	5.01	0	2	1.647	0.72	0.475949	478706	788458	59.1	67.77	2	2	747107	306729	467857	1.32875e+06	704936	306729	409339	816043	2	2	2	2	High	High	High	High	1	Methylthio [C102]
TGGT1_215430	transcript=TGGT1_215430-t26_1 | gene=TGGT1_215430 | organism=Toxoplasma_gondii_GT1 | gene_product=hypothetical protein | transcript_product=hypothetical protein | location=TGGT1_chrX:6843523-6847906(-) | protein_length=244 | sequence_SO=chromosome | SO=protein_coding_gene | is_pseudo=false	0	FALSE	8.647	19	3	4	3	244	27.5	5.54	1.87	3	1.647	0.72	0.475949	298852	492205	57.4	50.79	2	2	459727	194273	337975	716814	433777	194273	295702	440225	3	3	3	3	High	Peak Found	Peak Found	High	1
TGGT1_242070	transcript=TGGT1_242070-t26_1 | gene=TGGT1_242070 | organism=Toxoplasma_gondii_GT1 | gene_product=cAMP-dependent protein kinase regulatory subunit [Source:UniProtKB/TrEMBL;Acc:A0A125YLM5] | transcript_product=cAMP-dependent protein kinase regulatory subunit | location=TGGT1_chrVI:1804976-1810461(-) | protein_length=385 | sequence_SO=chromosome | SO=protein_coding_gene | is_pseudo=false	0	FALSE	9.997	11	3	6	3	385	42.8	5.21	5.85	3	1.636	0.71	0.494031	674525	1.10344e+06	64.42	9.59	2	2	1.10285e+06	412553	1.03096e+06	1.18102e+06	1.0406e+06	412553	902009	725314	3	2	2	3	High	High	High	High	1
TGGT1_297060	transcript=TGGT1_297060-t26_1 | gene=TGGT1_297060 | organism=Toxoplasma_gondii_GT1 | gene_product=Phosphoglycerate mutase [Source:UniProtKB/TrEMBL;Acc:S7UKZ1] | transcript_product=phosphoglycerate mutase PGMII | location=TGGT1_chrII:1486715-1490594(-) | protein_length=339 | sequence_SO=chromosome | SO=protein_coding_gene | is_pseudo=false	0	FALSE	6.872	9	2	5	2	339	38.1	8.13	1.65	2	1.633	0.71	0.498792	500699	817517	23.24	56.93	2	2	591017	424183	533580	1.25255e+06	557656	424183	466842	769241	2	2	2	2	High	High	High	High	1
TGGT1_214080	transcript=TGGT1_214080-t26_1 | gene=TGGT1_214080 | organism=Toxoplasma_gondii_GT1 | gene_product=Toxofilin [Source:UniProtKB/TrEMBL;Acc:A0A125YQJ5] | transcript_product=toxofilin | location=TGGT1_chrX:5904318-5905055(+) | protein_length=245 | sequence_SO=chromosome | SO=protein_coding_gene | is_pseudo=false	0	FALSE	31.429	42	9	26	9	245	27.1	9.57	35.04	9	1.623	0.7	0.520906	7.20908e+06	1.16993e+07	43.36	14.69	2	2	9.89575e+06	5.25183e+06	1.05408e+07	1.2985e+07	9.33717e+06	5.25183e+06	9.22243e+06	7.97465e+06	8	6	8	8	High	High	High	High	1
TGGT1_290200	transcript=TGGT1_290200-t26_1 | gene=TGGT1_290200 | organism=Toxoplasma_gondii_GT1 | gene_product=Octopine_DH domain-containing protein [Source:UniProtKB/TrEMBL;Acc:S7VXT3] | transcript_product=NAD/NADP octopine/nopaline dehydrogenase, alpha-helical domain-containing protein | location=TGGT1_chrIX:3448166-3452814(-) | protein_length=435 | sequence_SO=chromosome | SO=protein_coding_gene | is_pseud…	0	FALSE	14.038	15	5	9	5	435	48	7.27	2.1	5	1.621	0.7	0.521581	1.3801e+06	2.23768e+06	16.72	17.83	2	2	1.22552e+06	1.55417e+06	2.53998e+06	1.97136e+06	1.15635e+06	1.55417e+06	2.22229e+06	1.2107e+06	3	5	5	5	High	High	High	High	1
TGGT1_269840	transcript=TGGT1_269840-t26_1 | gene=TGGT1_269840 | organism=Toxoplasma_gondii_GT1 | gene_product=MPN domain-containing protein [Source:UniProtKB/TrEMBL;Acc:A0A125YUB2] | transcript_product=proteasome regulatory subunit | location=TGGT1_chrVIII:5579434-5582614(-) | protein_length=314 | sequence_SO=chromosome | SO=protein_coding_gene | is_pseudo=false	0.001	FALSE	5.459	7	2	5	2	314	35.2	6.54	3.56	2	1.616	0.69	0.531406	213031	344355	88.24	41.94	2	2	442715	102509	467516	253639	417725	102509	409041	155770	2	2	2	2	High	Peak Found	High	High	1
TGGT1_243950	transcript=TGGT1_243950-t26_1 | gene=TGGT1_243950 | organism=Toxoplasma_gondii_GT1 | gene_product=Prohibitin [Source:UniProtKB/TrEMBL;Acc:A0A125YRG2] | transcript_product=putative prohibitin | location=TGGT1_chrVI:2820162-2822544(+) | protein_length=271 | sequence_SO=chromosome | SO=protein_coding_gene | is_pseudo=false	0	FALSE	8.243	11	3	8	3	271	30.2	8.1	8.18	3	1.613	0.69	0.536133	1.10005e+06	1.77492e+06	40.4	4.65	2	2	1.47585e+06	819945	1.83433e+06	1.71743e+06	1.39255e+06	819945	1.6049e+06	1.05474e+06	2	2	2	3	High	High	High	High	1
TGGT1_215220	transcript=TGGT1_215220-t26_1 | gene=TGGT1_215220 | organism=Toxoplasma_gondii_GT1 | gene_product=hypothetical protein | transcript_product=hypothetical protein | location=TGGT1_chrX:6716950-6719044(+) | protein_length=502 | sequence_SO=chromosome | SO=protein_coding_gene | is_pseudo=false	0.001	FALSE	5.169	15	2	5	2	502	55.1	5.36	5.6	2	1.601	0.68	0.562277	2.28925e+06	3.66594e+06	1.83	3.58	2	2	2.25981e+06	2.31908e+06	3.57431e+06	3.75991e+06	2.13225e+06	2.31908e+06	3.12724e+06	2.30912e+06	2	2	2	2	High	High	High	High	1
TGGT1_263730	transcript=TGGT1_263730-t26_1 | gene=TGGT1_263730 | organism=Toxoplasma_gondii_GT1 | gene_product=Glycerol-3-phosphate dehydrogenase [Source:UniProtKB/TrEMBL;Acc:A0A125YIL0] | transcript_product=FAD-dependent glycerol-3-phosphate dehydrogenase | location=TGGT1_chrVIIb:330001-337948(-) | protein_length=653 | sequence_SO=chromosome | SO=protein_coding_gene | is_pseudo=false	0.023	FALSE	1.936	2	1	2	1	653	71.5	6.96	0	1	1.594	0.67	0.569309	75553.3	120459	73.59	59.54	2	2	134513	42436.9	188716	76889.5	126920	42436.9	165112	47221	1	1	1	1	High	Peak Found	High	Peak Found	1
TGGT1_230705	transcript=TGGT1_230705-t26_1 | gene=TGGT1_230705 | organism=Toxoplasma_gondii_GT1 | gene_product=hypothetical protein | transcript_product=hypothetical protein | location=TGGT1_chrVIII:985569-986920(-) | protein_length=266 | sequence_SO=chromosome | SO=protein_coding_gene | is_pseudo=false	0.059	FALSE	1.54	5	1	1	1	266	28.5	5.96	0	1	1.582	0.66	0.586958	92746.6	146768	79.9	75.62	2	2	175904	48901.3	266559	80811.5	165975	48901.3	233218	49629.7	1	1	1	1	Peak Found	Peak Found	High	Peak Found	1
TGGT1_275440	transcript=TGGT1_275440-t26_1 | gene=TGGT1_275440 | organism=Toxoplasma_gondii_GT1 | gene_product=Dense granule protein GRA6 [Source:UniProtKB/TrEMBL;Acc:S7UQL8] | transcript_product=dense granule protein GRA6 | location=TGGT1_chrX:7158307-7158999(-) | protein_length=223 | sequence_SO=chromosome | SO=protein_coding_gene | is_pseudo=false	0	FALSE	18.536	23	3	12	3	223	23.3	5.66	35.84	3	1.58	0.66	0.591508	4.43501e+06	7.00631e+06	58.34	43.99	2	2	6.87695e+06	2.86018e+06	9.66542e+06	5.07876e+06	6.48877e+06	2.86018e+06	8.4565e+06	3.11908e+06	3	3	3	3	High	High	High	High	1
TGGT1_293190	transcript=TGGT1_293190-t26_1 | gene=TGGT1_293190 | organism=Toxoplasma_gondii_GT1 | gene_product=IPPc domain-containing protein [Source:UniProtKB/TrEMBL;Acc:A0A125YFF1] | transcript_product=endonuclease/exonuclease/phosphatase family protein | location=TGGT1_chrIa:133494-141236(+) | protein_length=682 | sequence_SO=chromosome | SO=protein_coding_gene | is_pseudo=false	0.049	FALSE	1.657	2	1	1	1	682	76.2	5.47	0	1	1.575	0.66	0.599087	229655	361695	55.92	NA	2	1	348894	151167	361695	NA	329200	151167	316456	NA	1	1	1	NA	High	Peak Found	Peak Found	Not Found	1
TGGT1_202680	transcript=TGGT1_202680-t26_1 | gene=TGGT1_202680 | organism=Toxoplasma_gondii_GT1 | gene_product=Putative peptidase M16, alpha subunit [Source:UniProtKB/TrEMBL;Acc:A0A125YN38] | transcript_product=putative peptidase M16, alpha subunit | location=TGGT1_chrVIIa:3006392-3012675(-) | protein_length=563 | sequence_SO=chromosome | SO=protein_coding_gene | is_pseudo=false	0	FALSE	22.579	16	7	13	7	563	62.1	8.32	6.76	7	1.563	0.64	0.625457	894886	1.39901e+06	63.66	17.74	2	2	1.45334e+06	551023	1.58702e+06	1.23328e+06	1.3713e+06	551023	1.38852e+06	757410	4	3	5	4	High	High	High	High	1	Methylthio [C218]
TGGT1_320600	transcript=TGGT1_320600-t26_1 | gene=TGGT1_320600 | organism=Toxoplasma_gondii_GT1 | gene_product=CSD_1 domain-containing protein [Source:UniProtKB/TrEMBL;Acc:S7VSL4] | transcript_product=cold-shock DNA-binding domain-containing protein | location=TGGT1_chrIV:154209-155894(+) | protein_length=209 | sequence_SO=chromosome | SO=protein_coding_gene | is_pseudo=false	0	FALSE	14.161	19	2	9	2	209	23.1	9.82	18	2	1.562	0.64	0.625457	1.18506e+06	1.85135e+06	28.28	67.31	2	2	1.45139e+06	967595	1.10312e+06	3.10708e+06	1.36947e+06	967595	965146	1.90819e+06	2	2	2	2	High	High	High	High	1
TGGT1_224205	transcript=TGGT1_224205-t26_1 | gene=TGGT1_224205 | organism=Toxoplasma_gondii_GT1 | gene_product=Putative ER lumen protein retaining receptor [Source:UniProtKB/TrEMBL;Acc:S7W4P2] | transcript_product=putative ER lumen protein retaining receptor | location=TGGT1_chrX:3144449-3149603(-) | protein_length=378 | sequence_SO=chromosome | SO=protein_coding_gene | is_pseudo=false	0.055	FALSE	1.592	10	1	1	1	378	41.5	6.98	0	1	1.559	0.64	0.628884	125092	194985	33.08	30.96	2	2	158754	98568.3	243580	156085	149793	98568.3	213114	95858.1	1	1	1	1	Peak Found	Peak Found	High	Peak Found	1
TGGT1_247550	transcript=TGGT1_247550-t26_1 | gene=TGGT1_247550 | organism=Toxoplasma_gondii_GT1 | gene_product=Heat shock protein HSP60 [Source:UniProtKB/TrEMBL;Acc:A0A125YNH1] | transcript_product=heat shock protein HSP60 | location=TGGT1_chrXII:3342084-3346052(-) | protein_length=575 | sequence_SO=chromosome | SO=protein_coding_gene | is_pseudo=false	0	FALSE	48.128	34	13	27	13	575	60.9	5.97	33.09	13	1.558	0.64	0.628884	4.46392e+06	6.95681e+06	79.12	37.67	2	2	8.3991e+06	2.37247e+06	5.29495e+06	9.14025e+06	7.925e+06	2.37247e+06	4.63267e+06	5.61341e+06	13	9	10	13	High	High	High	High	1
TGGT1_237250	transcript=TGGT1_237250-t26_1 | gene=TGGT1_237250 | organism=Toxoplasma_gondii_GT1 | gene_product=GOLD domain-containing protein [Source:UniProtKB/TrEMBL;Acc:S7W5F1] | transcript_product=hypothetical protein | location=TGGT1_chrX:5697810-5699972(+) | protein_length=259 | sequence_SO=chromosome | SO=protein_coding_gene | is_pseudo=false	0.001	FALSE	4.955	14	2	3	2	259	28.5	8.98	0	2	1.536	0.62	0.661115	236161	362845	30.44	17.41	2	2	293886	189774	410628	320623	277297	189774	359268	196908	2	2	2	2	High	Peak Found	High	Peak Found	1
TGGT1_251810	transcript=TGGT1_251810-t26_1 | gene=TGGT1_251810 | organism=Toxoplasma_gondii_GT1 | gene_product=Eukaryotic translation initiation factor 5A [Source:UniProtKB/TrEMBL;Acc:A0A125YIS3] | transcript_product=putative translation initiation factor eIF-5A | location=TGGT1_chrXII:5518720-5519205(-) | protein_length=161 | sequence_SO=chromosome | SO=protein_coding_gene | is_pseudo=false	0	FALSE	6.467	12	2	8	2	161	17.5	5.39	2.26	2	1.535	0.62	0.661115	895368	1.37455e+06	37.25	36.58	2	2	1.17258e+06	683690	1.05495e+06	1.79098e+06	1.10639e+06	683690	923001	1.09992e+06	2	2	2	2	High	Peak Found	High	High	1
TGGT1_261970	transcript=TGGT1_261970-t26_1 | gene=TGGT1_261970 | organism=Toxoplasma_gondii_GT1 | gene_product=hypothetical protein | transcript_product=hypothetical protein | location=TGGT1_chrVIIb:1426346-1428657(+) | protein_length=677 | sequence_SO=chromosome | SO=protein_coding_gene | is_pseudo=false	0.001	FALSE	3.564	4	1	1	1	677	73.2	10.48	0	1	1.528	0.61	0.676644	146705	224114	14.14	NA	2	1	162188	132700	224114	NA	153033	132700	196082	NA	1	1	1	NA	Peak Found	Peak Found	High	Not Found	1
TGGT1_305510	transcript=TGGT1_305510-t26_1 | gene=TGGT1_305510 | organism=Toxoplasma_gondii_GT1 | gene_product=hypothetical protein | transcript_product=hypothetical protein | location=TGGT1_chrIX:5224337-5226852(+) | protein_length=417 | sequence_SO=chromosome | SO=protein_coding_gene | is_pseudo=false	0.023	FALSE	1.955	3	1	1	1	417	45.2	7.77	0	1	1.526	0.61	0.677403	61996.1	94631.2	18.93	21.39	2	2	70932.6	54185.5	110209	81255.3	66928.7	54185.5	96424.6	49902.2	1	1	1	1	Peak Found	Peak Found	High	Peak Found	1
TGGT1_254470	transcript=TGGT1_254470-t26_1 | gene=TGGT1_254470 | organism=Toxoplasma_gondii_GT1 | gene_product=hypothetical protein | transcript_product=hypothetical protein | location=TGGT1_chrIII:1739403-1743582(+) | protein_length=732 | sequence_SO=chromosome | SO=protein_coding_gene | is_pseudo=false	0	FALSE	19.333	11	6	11	6	732	80.4	5.27	10.36	6	1.522	0.61	0.688835	642917	978466	101.88	105.83	2	2	1.59489e+06	259166	2.579e+06	371227	1.50487e+06	259166	2.25643e+06	227986	5	3	6	4	High	Peak Found	High	Peak Found	1
TGGT1_313495	transcript=TGGT1_313495-t26_1 | gene=TGGT1_313495 | organism=Toxoplasma_gondii_GT1 | gene_product=hypothetical protein | transcript_product=hypothetical protein | location=TGGT1_chrXI:3402775-3413318(-) | protein_length=2903 | sequence_SO=chromosome | SO=protein_coding_gene | is_pseudo=false	0.053	FALSE	1.607	0	1	1	1	2903	313.8	6.96	0	1	1.517	0.6	0.70057	94819.7	143879	39.47	38.25	2	2	71184.3	126303	109029	189867	67166.2	126303	95392.4	116605	1	1	1	1	Peak Found	Peak Found	Peak Found	High	1	Phospho [S1126; S1127]
TGGT1_270240	transcript=TGGT1_270240-t26_1 | gene=TGGT1_270240 | organism=Toxoplasma_gondii_GT1 | gene_product=MAG1 protein [Source:UniProtKB/TrEMBL;Acc:S7V482] | transcript_product=MAG1 protein | location=TGGT1_chrVIII:5310162-5311630(+) | protein_length=452 | sequence_SO=chromosome | SO=protein_coding_gene | is_pseudo=false	0	FALSE	62.125	38	13	79	13	452	49.2	4.96	103.94	13	1.515	0.6	0.704833	5.17464e+07	7.83735e+07	82.71	105.96	2	2	1.01103e+08	2.64849e+07	2.06986e+08	2.96755e+07	9.53957e+07	2.64849e+07	1.81097e+08	1.82249e+07	12	12	12	12	High	High	High	High	1	Methylthio [C297; C308]
TGGT1_220400	transcript=TGGT1_220400-t26_1 | gene=TGGT1_220400 | organism=Toxoplasma_gondii_GT1 | gene_product=ADF-H domain-containing protein [Source:UniProtKB/TrEMBL;Acc:A0A125YJR5] | transcript_product=actin depolymerizing factor ADF | location=TGGT1_chrV:254875-256188(-) | protein_length=118 | sequence_SO=chromosome | SO=protein_coding_gene | is_pseudo=false	0	FALSE	12.043	34	3	10	3	118	12.9	7.75	16.59	3	1.513	0.6	0.704833	3.46865e+06	5.24848e+06	32.14	27.07	2	2	4.37142e+06	2.75232e+06	4.32369e+06	6.37107e+06	4.12467e+06	2.75232e+06	3.7829e+06	3.91274e+06	3	3	3	3	High	High	High	High	1	Methylthio [C58; C65]
TGGT1_293340	transcript=TGGT1_293340-t26_1 | gene=TGGT1_293340 | organism=Toxoplasma_gondii_GT1 | gene_product=RanBD1 domain-containing protein [Source:UniProtKB/TrEMBL;Acc:A0A125YKE1] | transcript_product=putative ran binding family protein 1 | location=TGGT1_chrIa:253878-256712(-) | protein_length=212 | sequence_SO=chromosome | SO=protein_coding_gene | is_pseudo=false	0.023	FALSE	1.949	5	1	1	1	212	24.3	4.97	0	1	1.51	0.59	0.704833	226690	342222	41.47	8.11	2	2	306656	167577	323122	362450	289347	167577	282707	222596	1	1	1	1	High	Peak Found	Peak Found	Peak Found	1
TGGT1_216880	transcript=TGGT1_216880-t26_1 | gene=TGGT1_216880 | organism=Toxoplasma_gondii_GT1 | gene_product=WD_REPEATS_REGION domain-containing protein [Source:UniProtKB/TrEMBL;Acc:A0A125YYR8] | transcript_product=guanine nucleotide-binding protein | location=TGGT1_chrXI:5736268-5739860(-) | protein_length=321 | sequence_SO=chromosome | SO=protein_coding_gene | is_pseudo=false	0	FALSE	30.092	35	9	20	9	321	35.1	6.34	16.63	9	1.508	0.59	0.704833	3.22211e+06	4.85882e+06	37.85	44.29	2	2	4.23924e+06	2.44902e+06	3.51387e+06	6.71856e+06	3999948	2.44902e+06	3.07437e+06	4.12615e+06	8	8	8	9	High	High	High	High	1	Methylthio [C143; C187; C288]
TGGT1_219860	transcript=TGGT1_219860-t26_1 | gene=TGGT1_219860 | organism=Toxoplasma_gondii_GT1 | gene_product=DNA helicase [Source:UniProtKB/TrEMBL;Acc:S7V1T5] | transcript_product=putative replication licensing factor | location=TGGT1_chrXII:515884-525132(-) | protein_length=972 | sequence_SO=chromosome | SO=protein_coding_gene | is_pseudo=false	0	FALSE	11.926	7	3	8	3	972	108.1	5.08	5.39	3	1.506	0.59	0.704833	466880	703342	70.42	28.8	2	2	806442	270295	864725	572078	760921	270295	756568	351337	3	2	3	3	High	High	High	High	1
TGGT1_271810	transcript=TGGT1_271810-t26_1 | gene=TGGT1_271810 | organism=Toxoplasma_gondii_GT1 | gene_product=Putative lanp [Source:UniProtKB/TrEMBL;Acc:S7V3U0] | transcript_product=putative lanp | location=TGGT1_chrVIII:4346960-4348612(-) | protein_length=283 | sequence_SO=chromosome | SO=protein_coding_gene | is_pseudo=false	0.001	FALSE	3.426	3	1	1	1	283	32	4.23	0	1	1.504	0.59	0.704833	202980	305185	43.51	58.15	2	2	278958	147696	197140	472446	263212	147696	172483	290149	1	1	1	1	Peak Found	Peak Found	Peak Found	High	1
TGGT1_200360	transcript=TGGT1_200360-t26_1 | gene=TGGT1_200360 | organism=Toxoplasma_gondii_GT1 | gene_product=hypothetical protein | transcript_product=hypothetical protein | location=TGGT1_chrVIII:6800991-6801551(+) | protein_length=186 | sequence_SO=chromosome | SO=protein_coding_gene | is_pseudo=false	0	FALSE	12.435	20	3	9	3	186	20.2	9.61	8.5	3	1.503	0.59	0.704833	1.76865e+06	2.65882e+06	56.22	56.63	2	2	2.69385e+06	1.16122e+06	4.06355e+06	1.7397e+06	2.54179e+06	1.16122e+06	3.55529e+06	1.06842e+06	3	3	3	3	High	High	High	High	1
TGGT1_240060	transcript=TGGT1_240060-t26_1 | gene=TGGT1_240060 | organism=Toxoplasma_gondii_GT1 | gene_product=hypothetical protein | transcript_product=hypothetical protein | location=TGGT1_chrVI:1027949-1030621(+) | protein_length=844 | sequence_SO=chromosome | SO=protein_coding_gene | is_pseudo=false	0	FALSE	40.042	16	9	25	9	844	88.7	10.89	19.51	9	1.503	0.59	0.704833	7.96433e+06	1.19694e+07	1.11	41.97	2	2	8.02707e+06	7.90209e+06	1.62544e+07	8.81401e+06	7.57397e+06	7.90209e+06	1.42214e+07	5.41305e+06	8	8	8	9	High	High	High	High	1
TGGT1_221210	transcript=TGGT1_221210-t26_1 | gene=TGGT1_221210 | organism=Toxoplasma_gondii_GT1 | gene_product=Peptidyl-prolyl cis-trans isomerase [Source:UniProtKB/TrEMBL;Acc:A0A125YG57] | transcript_product=cyclophilin | location=TGGT1_chrII:118956-120827(+) | protein_length=179 | sequence_SO=chromosome | SO=protein_coding_gene | is_pseudo=false	0	FALSE	31.47	63	8	24	8	179	19.6	6.54	16.04	8	1.502	0.59	0.704833	3.15e+06	4.72986e+06	23.6	60.74	2	2	3.72781e+06	2.66175e+06	2.98796e+06	7.48725e+06	3.51739e+06	2.66175e+06	2.61423e+06	4.59823e+06	8	7	6	8	High	High	High	High	1
TGGT1_313390	transcript=TGGT1_313390-t26_1 | gene=TGGT1_313390 | organism=Toxoplasma_gondii_GT1 | gene_product=Ribosomal protein RPL6 [Source:UniProtKB/TrEMBL;Acc:S7UT72] | transcript_product=ribosomal protein RPL6 | location=TGGT1_chrXI:3299999-3300967(+) | protein_length=322 | sequence_SO=chromosome | SO=protein_coding_gene | is_pseudo=false	0	FALSE	22.861	19	6	25	6	322	36.3	10.78	47.92	6	1.499	0.58	0.708249	2.41446e+07	3.61934e+07	10.95	45.17	2	2	2.6093e+07	22341644	5.03927e+07	2.59951e+07	2.46201e+07	22341644	4.40898e+07	1.59647e+07	6	6	6	6	High	High	High	High	1
TGGT1_222170	transcript=TGGT1_222170-t26_1 | gene=TGGT1_222170 | organism=Toxoplasma_gondii_GT1 | gene_product=Dense-granule antigen DG32 [Source:UniProtKB/TrEMBL;Acc:A0A125YI16] | transcript_product=dense-granule antigen DG32 | location=TGGT1_chrII:911318-912642(+) | protein_length=300 | sequence_SO=chromosome | SO=protein_coding_gene | is_pseudo=false	0	FALSE	10.998	14	3	8	3	300	33.6	9.38	8.51	3	1.497	0.58	0.711478	816240	1.22171e+06	73.77	34.45	2	2	1.45575e+06	457666	1.56656e+06	952778	1.37358e+06	457666	1.37062e+06	585140	3	2	3	3	High	High	High	High	1
TGGT1_207840	transcript=TGGT1_207840-t26_1 | gene=TGGT1_207840 | organism=Toxoplasma_gondii_GT1 | gene_product=Ribosomal protein RPS17 [Source:UniProtKB/TrEMBL;Acc:A0A125YWE7] | transcript_product=ribosomal protein RPS17 | location=TGGT1_chrIb:342658-344358(-) | protein_length=132 | sequence_SO=chromosome | SO=protein_coding_gene | is_pseudo=false	0	FALSE	15.519	52	5	12	5	132	15.2	10.7	0	5	1.494	0.58	0.716078	1.84172e+06	2.7524e+06	36.11	33.99	2	2	2.39133e+06	1.41843e+06	2.15407e+06	3.51693e+06	2.25634e+06	1.41843e+06	1.88465e+06	2.15989e+06	5	4	5	5	High	High	High	High	1
TGGT1_248810	transcript=TGGT1_248810-t26_1 | gene=TGGT1_248810 | organism=Toxoplasma_gondii_GT1 | gene_product=Nuclear factor NF7 [Source:UniProtKB/TrEMBL;Acc:S7V0H2] | transcript_product=nuclear factor NF7 | location=TGGT1_chrXII:4119880-4123828(+) | protein_length=497 | sequence_SO=chromosome | SO=protein_coding_gene | is_pseudo=false	0.001	FALSE	3.381	4	2	2	2	497	54.2	7.02	0	2	1.492	0.58	0.722973	235688	351534	53.3	18.2	2	2	350356	158549	308867	400096	330580	158549	270235	245716	2	2	2	2	Peak Found	Peak Found	Peak Found	High	1
TGGT1_227390	transcript=TGGT1_227390-t26_1 | gene=TGGT1_227390 | organism=Toxoplasma_gondii_GT1 | gene_product=SET domain-containing protein [Source:UniProtKB/TrEMBL;Acc:S7UX38] | transcript_product=hypothetical protein | location=TGGT1_chrX:876324-880460(-) | protein_length=1066 | sequence_SO=chromosome | SO=protein_coding_gene | is_pseudo=false	0.025	FALSE	1.913	2	1	4	1	1066	116.1	5.25	0	1	1.489	0.57	0.727125	778907	1.15951e+06	45.17	59.28	2	2	559448	1.08445e+06	741764	1.81251e+06	527870	1.08445e+06	648986	1.11314e+06	1	1	1	1	High	High	High	High	1	Methylthio [C221]
TGGT1_261210	transcript=TGGT1_261210-t26_1 | gene=TGGT1_261210 | organism=Toxoplasma_gondii_GT1 | gene_product=PCI domain-containing protein [Source:UniProtKB/TrEMBL;Acc:A0A125YZG8] | transcript_product=putative 26s proteasome subunit p55 | location=TGGT1_chrVIIb:1803646-1810703(+) | protein_length=485 | sequence_SO=chromosome | SO=protein_coding_gene | is_pseudo=false	0.001	FALSE	3.51	4	2	3	2	485	55	6.2	1.6	2	1.486	0.57	0.729474	368497	547475	52.89	15.96	2	2	545909	248741	613171	488817	515094	248741	536478	300203	2	2	2	2	High	Peak Found	High	Peak Found	1
TGGT1_233870	transcript=TGGT1_233870-t26_1 | gene=TGGT1_233870 | organism=Toxoplasma_gondii_GT1 | gene_product=hypothetical protein | transcript_product=hypothetical protein | location=TGGT1_chrVIII:2865666-2870627(-) | protein_length=1535 | sequence_SO=chromosome | SO=protein_coding_gene | is_pseudo=false	0.021	FALSE	1.969	1	1	1	1	1535	164.2	8.53	0	1	1.483	0.57	0.729474	159165	236085	NA	NA	1	1	159165	NA	236085	NA	150181	NA	206556	NA	1	NA	1	NA	Peak Found	Not Found	High	Not Found	1
TGGT1_306700	transcript=TGGT1_306700-t26_1 | gene=TGGT1_306700 | organism=Toxoplasma_gondii_GT1 | gene_product=hypothetical protein | transcript_product=hypothetical protein | location=TGGT1_chrIX:6082952-6084626(+) | protein_length=206 | sequence_SO=chromosome | SO=protein_coding_gene | is_pseudo=false	0.047	FALSE	1.698	7	1	2	1	206	21.9	8.15	0	1	1.482	0.57	0.729474	2.73706e+06	4.05724e+06	25.31	67.84	2	2	2.28407e+06	3.27988e+06	2.40584e+06	6.84219e+06	2.15514e+06	3.27988e+06	2.10493e+06	4.20207e+06	1	1	1	1	Peak Found	Peak Found	High	High	1
TGGT1_213280	transcript=TGGT1_213280-t26_1 | gene=TGGT1_213280 | organism=Toxoplasma_gondii_GT1 | gene_product=SAG-related sequence SRS25 [Source:UniProtKB/TrEMBL;Acc:A0A125YZD2] | transcript_product=SAG-related sequence SRS25 | location=TGGT1_chrV:764647-765222(-) | protein_length=191 | sequence_SO=chromosome | SO=protein_coding_gene | is_pseudo=false	0.001	FALSE	3.244	14	1	2	1	191	20.8	6.06	0	1	1.474	0.56	0.738606	146774	216366	71.18	22.8	2	2	255349	84366	183892	254576	240935	84366	160891	156345	1	1	1	1	High	Peak Found	Peak Found	High	1	Methylthio [C56]
TGGT1_234190	transcript=TGGT1_234190-t26_1 | gene=TGGT1_234190 | organism=Toxoplasma_gondii_GT1 | gene_product=Serine hydroxymethyltransferase [Source:UniProtKB/TrEMBL;Acc:S7UVS8] | transcript_product=putative serine hydroxymethyltransferase 2 | location=TGGT1_chrX:4074410-4078362(-) | protein_length=595 | sequence_SO=chromosome | SO=protein_coding_gene | is_pseudo=false	0.004	FALSE	2.662	4	1	2	1	595	65.2	8.02	0	1	1.473	0.56	0.738606	199551	293993	65.53	32.94	2	2	329523	120843	231892	372723	310922	120843	202888	228905	1	1	1	1	High	Peak Found	High	Peak Found	1
TGGT1_292080	transcript=TGGT1_292080-t26_1 | gene=TGGT1_292080 | organism=Toxoplasma_gondii_GT1 | gene_product=Leucyl-tRNA synthetase [Source:UniProtKB/TrEMBL;Acc:S7UPR1] | transcript_product=leucyl-tRNA synthetase | location=TGGT1_chrIX:4343158-4354677(+) | protein_length=1261 | sequence_SO=chromosome | SO=protein_coding_gene | is_pseudo=false	0	FALSE	16.459	6	5	12	5	1261	141.2	6.96	5	5	1.471	0.56	0.738606	1.09825e+06	1.61575e+06	56.48	27.75	2	2	1.67641e+06	719489	1.97119e+06	1.32441e+06	1.58178e+06	719489	1.72464e+06	813376	5	4	5	5	High	Peak Found	High	High	1
TGGT1_316370	transcript=TGGT1_316370-t26_1 | gene=TGGT1_316370 | organism=Toxoplasma_gondii_GT1 | gene_product=hypothetical protein | transcript_product=hypothetical protein | location=TGGT1_chrXI:5202591-5207438(-) | protein_length=824 | sequence_SO=chromosome | SO=protein_coding_gene | is_pseudo=false	0.009	FALSE	2.258	1	1	2	1	824	88	9.6	0	1	1.471	0.56	0.738606	1.69986e+06	2.50028e+06	18.65	0.26	2	2	1.48864e+06	1.94104e+06	2.50496e+06	2.49561e+06	1.40461e+06	1.94104e+06	2.19164e+06	1.53266e+06	1	1	1	1	High	Peak Found	High	Peak Found	1	Biotin [K580]
TGGT1_266060	transcript=TGGT1_266060-t26_1 | gene=TGGT1_266060 | organism=Toxoplasma_gondii_GT1 | gene_product=40S ribosomal protein SA [Source:UniProtKB/TrEMBL;Acc:A0A125YJG1] | transcript_product=ribosomal protein RPSA | location=TGGT1_chrIX:1148543-1150882(-) | protein_length=287 | sequence_SO=chromosome | SO=protein_coding_gene | is_pseudo=false	0	FALSE	21.62	23	5	14	5	287	31.5	5.31	8.68	5	1.469	0.55	0.743026	1.39033e+06	2.04203e+06	54.07	7.86	2	2	2.07992e+06	929373	1.93155e+06	2.15884e+06	1.96251e+06	929373	1.68996e+06	1.32583e+06	4	3	4	4	High	High	High	High	1
TGGT1_299050	transcript=TGGT1_299050-t26_1 | gene=TGGT1_299050 | organism=Toxoplasma_gondii_GT1 | gene_product=Ribosomal protein RPL17 [Source:UniProtKB/TrEMBL;Acc:A0A125YQZ7] | transcript_product=ribosomal protein RPL17 | location=TGGT1_chrIII:2205438-2207707(-) | protein_length=195 | sequence_SO=chromosome | SO=protein_coding_gene | is_pseudo=false	0	FALSE	29.048	33	6	49	6	195	22.3	10.17	74.42	6	1.465	0.55	0.75224	4.35803e+07	6.3833e+07	8.93	15.1	2	2	4.64264e+07	4.09087e+07	7.10538e+07	5.7346e+07	4.38058e+07	4.09087e+07	6.21666e+07	3.52186e+07	6	6	6	7	High	High	High	High	1	Methylthio [C150]
TGGT1_250710	transcript=TGGT1_250710-t26_1 | gene=TGGT1_250710 | organism=Toxoplasma_gondii_GT1 | gene_product=Microneme protein MIC10 [Source:UniProtKB/TrEMBL;Acc:A0A125YLT8] | transcript_product=microneme protein MIC10 | location=TGGT1_chrXII:5071359-5071955(+) | protein_length=198 | sequence_SO=chromosome | SO=protein_coding_gene | is_pseudo=false	0	FALSE	36.943	38	7	31	7	198	23.1	5.87	70.75	7	1.464	0.55	0.75224	1.87265e+07	2.74187e+07	30.28	17.23	2	2	1.50662e+07	2.32762e+07	2.42596e+07	3.09893e+07	1.42158e+07	2.32762e+07	2.12253e+07	1.90318e+07	5	8	7	8	High	High	High	High	1
TGGT1_232250	transcript=TGGT1_232250-t26_1 | gene=TGGT1_232250 | organism=Toxoplasma_gondii_GT1 | gene_product=Catalase [Source:UniProtKB/TrEMBL;Acc:S7V3B9] | transcript_product=catalase | location=TGGT1_chrVIII:1969434-1975537(-) | protein_length=502 | sequence_SO=chromosome | SO=protein_coding_gene | is_pseudo=false	0	FALSE	28.157	27	10	23	10	502	57.2	7.2	8.99	10	1.451	0.54	0.778169	3.16096e+06	4.5871e+06	0.43	52.47	2	2	3.17063e+06	3.15131e+06	3.10685e+06	6.7726e+06	2.99166e+06	3.15131e+06	2.71826e+06	4.15933e+06	8	9	8	10	High	High	High	High	1	Methylthio [C383]
TGGT1_206470	transcript=TGGT1_206470-t26_1 | gene=TGGT1_206470 | organism=Toxoplasma_gondii_GT1 | gene_product=Dihydrolipoyl dehydrogenase [Source:UniProtKB/TrEMBL;Acc:A0A125YH62] | transcript_product=pyruvate dehydrogenase complex subunit PDH-E3II | location=TGGT1_chrVIIa:922416-929013(+) | protein_length=519 | sequence_SO=chromosome | SO=protein_coding_gene | is_pseudo=false	0.053	FALSE	1.598	3	1	1	1	519	55.1	7.03	0	1	1.444	0.53	0.79768	70612.5	101967	76.96	50.1	2	2	129972	38363.1	70407.8	147672	122636	38363.1	61601.4	90691.2	1	1	1	1	High	Peak Found	Peak Found	Peak Found	1
TGGT1_300260	transcript=TGGT1_300260-t26_1 | gene=TGGT1_300260 | organism=Toxoplasma_gondii_GT1 | gene_product=AA_TRNA_LIGASE_II domain-containing protein [Source:UniProtKB/TrEMBL;Acc:A0A125YPX4] | transcript_product=threonyl-tRNA synthetase family protein | location=TGGT1_chrXII:83727-88302(+) | protein_length=844 | sequence_SO=chromosome | SO=protein_coding_gene | is_pseudo=false	0	FALSE	12.467	6	4	5	4	844	95.8	7.49	2.19	4	1.441	0.53	0.803093	570110	821545	36.95	2.06	2	2	744955	436302	809667	833597	702905	436302	708396	511946	2	3	2	3	High	Peak Found	High	High	1	Methylthio [C542]
TGGT1_225930	transcript=TGGT1_225930-t26_1 | gene=TGGT1_225930 | organism=Toxoplasma_gondii_GT1 | gene_product=Triosephosphate isomerase [Source:UniProtKB/TrEMBL;Acc:A0A125YV67] | transcript_product=triose-phosphate isomerase TPI-I | location=TGGT1_chrX:1833650-1835998(+) | protein_length=253 | sequence_SO=chromosome | SO=protein_coding_gene | is_pseudo=false	0	FALSE	10.507	17	3	6	3	253	27.9	6.09	2.89	3	1.438	0.52	0.803203	466533	670846	36.22	26.05	2	2	606237	359023	556792	808263	572018	359023	487150	496388	3	3	3	3	High	Peak Found	High	High	1
TGGT1_221380	transcript=TGGT1_221380-t26_1 | gene=TGGT1_221380 | organism=Toxoplasma_gondii_GT1 | gene_product=Alba domain-containing protein [Source:UniProtKB/TrEMBL;Acc:A0A125YMA6] | transcript_product=alba 1 | location=TGGT1_chrII:281451-282798(-) | protein_length=247 | sequence_SO=chromosome | SO=protein_coding_gene | is_pseudo=false	0	FALSE	18.27	24	6	16	6	247	27.2	9.74	27.04	6	1.438	0.52	0.803203	4.41236e+06	6.34348e+06	56.18	37.59	2	2	6.71797e+06	2.89804e+06	8.32893e+06	4.83133e+06	6.33877e+06	2.89804e+06	7.28717e+06	2.96712e+06	6	6	6	6	High	High	High	High	1
TGGT1_319550	transcript=TGGT1_319550-t26_1 | gene=TGGT1_319550 | organism=Toxoplasma_gondii_GT1 | gene_product=GDT1 family protein [Source:UniProtKB/TrEMBL;Acc:S7VYN4] | transcript_product=putative membrane protein C17G8.08c | location=TGGT1_chrIV:860678-864817(+) | protein_length=343 | sequence_SO=chromosome | SO=protein_coding_gene | is_pseudo=false	0	FALSE	7.207	10	1	3	1	343	36.2	5.81	2.96	1	1.435	0.52	0.803203	278069	399160	34.16	22.55	2	2	355771	217338	468805	339862	335689	217338	410168	208724	1	1	1	1	High	High	High	Peak Found	1
TGGT1_216450	transcript=TGGT1_216450-t26_1 | gene=TGGT1_216450 | organism=Toxoplasma_gondii_GT1 | gene_product=Proteasome subunit alpha type [Source:UniProtKB/TrEMBL;Acc:S7VUL7] | transcript_product=peptidase, T1 family protein | location=TGGT1_chrXI:6058951-6061605(+) | protein_length=260 | sequence_SO=chromosome | SO=protein_coding_gene | is_pseudo=false	0.001	FALSE	5.363	11	3	3	3	260	27.9	5.2	0	3	1.434	0.52	0.803203	545357	782216	27.47	1.24	2	2	663919	447968	775401	789091	626443	447968	678417	484614	3	3	3	3	Peak Found	Peak Found	Peak Found	High	1
TGGT1_237150	transcript=TGGT1_237150-t26_1 | gene=TGGT1_237150 | organism=Toxoplasma_gondii_GT1 | gene_product=Putative minor histocompatibility antigen h13 [Source:UniProtKB/TrEMBL;Acc:S7UR45] | transcript_product=putative minor histocompatibility antigen h13 | location=TGGT1_chrX:5632583-5637249(-) | protein_length=417 | sequence_SO=chromosome | SO=protein_coding_gene | is_pseudo=false	0	FALSE	18.537	12	3	11	3	417	46.2	6.47	16.26	3	1.432	0.52	0.803203	2.85865e+06	4.09238e+06	32.16	37.98	2	2	3.60309e+06	2.26802e+06	5.38929e+06	3.10756e+06	3.39971e+06	2.26802e+06	4.71522e+06	1.90848e+06	3	3	3	3	High	High	High	High	1
TGGT1_262933	transcript=TGGT1_262933-t26_1 | gene=TGGT1_262933 | organism=Toxoplasma_gondii_GT1 | gene_product=hypothetical protein | transcript_product=hypothetical protein | location=TGGT1_chrVIIb:888435-891670(-) | protein_length=666 | sequence_SO=chromosome | SO=protein_coding_gene | is_pseudo=false	0	FALSE	6.435	3	1	4	1	666	72.4	9.63	2.9	1	1.43	0.52	0.803203	223633	319723	12.96	60.86	2	2	245158	203998	506649	201763	231320	203998	443279	123911	1	1	1	1	High	High	High	High	1
TGGT1_218410	transcript=TGGT1_218410-t26_1 | gene=TGGT1_218410 | organism=Toxoplasma_gondii_GT1 | gene_product=60S acidic ribosomal protein P0 [Source:UniProtKB/TrEMBL;Acc:A0A125YFP0] | transcript_product=ribosomal protein RPP0 | location=TGGT1_chrXII:1471598-1473146(+) | protein_length=314 | sequence_SO=chromosome | SO=protein_coding_gene | is_pseudo=false	0	FALSE	22.044	26	7	20	7	314	34.1	5.6	17.94	7	1.428	0.51	0.803203	4.28174e+06	6.11377e+06	46.34	33.55	2	2	6.01674e+06	3.04704e+06	4.80024e+06	7.78674e+06	5.67712e+06	3.04704e+06	4.19984e+06	4.78216e+06	7	7	7	7	High	High	High	High	1
TGGT1_253600	transcript=TGGT1_253600-t26_1 | gene=TGGT1_253600 | organism=Toxoplasma_gondii_GT1 | gene_product=hypothetical protein | transcript_product=hypothetical protein | location=TGGT1_chrIII:1031772-1039894(+) | protein_length=924 | sequence_SO=chromosome | SO=protein_coding_gene | is_pseudo=false	0	FALSE	19.255	8	6	13	6	924	97.3	9.44	13.39	6	1.427	0.51	0.803203	2.74998e+06	3.92301e+06	4.89	34.22	2	2	2.65649e+06	2.84676e+06	5.02159e+06	3.06477e+06	2.50654e+06	2.84676e+06	4.39351e+06	1.8822e+06	5	5	6	5	High	High	High	High	1
TGGT1_293710	transcript=TGGT1_293710-t26_1 | gene=TGGT1_293710 | organism=Toxoplasma_gondii_GT1 | gene_product=Zn-finger in Ran binding protein and others domain-containing protein [Source:UniProtKB/TrEMBL;Acc:A0A125YUP5] | transcript_product=Zn-finger in Ran binding protein and others domain-containing protein | location=TGGT1_chrIa:505713-507776(-) | protein_length=687 | sequence_SO=chromosome | SO=protein_…	0.017	FALSE	2.083	1	1	1	1	687	70.6	6.48	1.6	1	1.425	0.51	0.80454	234278	333921	96.63	107.74	2	2	540097	101623	908213	122772	509610	101623	794617	75399.5	1	1	1	1	Peak Found	Peak Found	High	Peak Found	1
TGGT1_289380	transcript=TGGT1_289380-t26_1 | gene=TGGT1_289380 | organism=Toxoplasma_gondii_GT1 | gene_product=hypothetical protein | transcript_product=hypothetical protein | location=TGGT1_chrIX:3052104-3057458(+) | protein_length=921 | sequence_SO=chromosome | SO=protein_coding_gene | is_pseudo=false	0	FALSE	15.692	7	6	8	6	921	100.2	7.94	3.4	6	1.423	0.51	0.80963	1.74891e+06	2.48898e+06	56.5	54.04	2	2	2.67001e+06	1.14557e+06	3.7227e+06	1.66412e+06	2.51929e+06	1.14557e+06	3.25708e+06	1.022e+06	5	4	6	6	High	Peak Found	High	Peak Found	1
TGGT1_229280	transcript=TGGT1_229280-t26_1 | gene=TGGT1_229280 | organism=Toxoplasma_gondii_GT1 | gene_product=hypothetical protein | transcript_product=hypothetical protein | location=TGGT1_chrVIII:128835-130964(+) | protein_length=709 | sequence_SO=chromosome | SO=protein_coding_gene | is_pseudo=false	0.001	FALSE	3.726	2	1	2	1	709	78.4	9.73	0	1	1.421	0.51	0.811692	128639	182819	2.23	8.64	2	2	126624	130686	194351	171972	119476	130686	170042	105615	1	1	1	1	Peak Found	Peak Found	High	High	1	Methylthio [C589]
TGGT1_247700	transcript=TGGT1_247700-t26_1 | gene=TGGT1_247700 | organism=Toxoplasma_gondii_GT1 | gene_product=AP2/ERF domain-containing protein [Source:UniProtKB/TrEMBL;Acc:S7V1L6] | transcript_product=AP2 domain transcription factor AP2XII-4 | location=TGGT1_chrXII:3439195-3451035(-) | protein_length=3831 | sequence_SO=chromosome | SO=protein_coding_gene | is_pseudo=false	0.018	FALSE	2.072	0	1	2	1	3831	400.8	7.53	0	1	1.42	0.51	0.813382	2.32436e+07	3.30017e+07	26.37	27.22	2	2	2.80695e+07	19247368	2.71576e+07	4.01033e+07	26485066	19247368	23760832	24629124	1	1	1	1	Peak Found	Peak Found	High	High	1
TGGT1_208730	transcript=TGGT1_208730-t26_1 | gene=TGGT1_208730 | organism=Toxoplasma_gondii_GT1 | gene_product=Putative microneme protein [Source:UniProtKB/TrEMBL;Acc:S7UJI5] | transcript_product=putative microneme protein | location=TGGT1_chrIb:849268-853225(-) | protein_length=1016 | sequence_SO=chromosome | SO=protein_coding_gene | is_pseudo=false	0	FALSE	9.555	4	3	3	3	1016	106.4	9.51	1.61	3	1.418	0.5	0.815739	324100	459707	41.18	88.51	2	2	437420	240137	958349	220516	412729	240137	838482	135428	3	1	3	1	Peak Found	Peak Found	High	Peak Found	1	Methylthio [C846]
TGGT1_309820	transcript=TGGT1_309820-t26_1 | gene=TGGT1_309820 | organism=Toxoplasma_gondii_GT1 | gene_product=Ribosomal protein RPL11 [Source:UniProtKB/TrEMBL;Acc:A0A125YTH4] | transcript_product=ribosomal protein RPL11 | location=TGGT1_chrXI:792484-794108(+) | protein_length=175 | sequence_SO=chromosome | SO=protein_coding_gene | is_pseudo=false	0	FALSE	22.66	41	6	135	6	175	20.2	10.07	117.06	6	1.414	0.5	0.825463	2.20019e+07	3.11168e+07	33.74	22.69	2	2	1.72511e+07	2.8061e+07	3.65827e+07	2.64676e+07	1.62774e+07	2.8061e+07	3.20071e+07	1.62548e+07	6	6	6	6	High	High	High	High	1	Methylthio [C68]
TGGT1_290970	transcript=TGGT1_290970-t26_1 | gene=TGGT1_290970 | organism=Toxoplasma_gondii_GT1 | gene_product=Aminotran_1_2 domain-containing protein [Source:UniProtKB/TrEMBL;Acc:S7VXX9] | transcript_product=8-amino-7-oxononanoate synthase | location=TGGT1_chrIX:3811046-3812950(-) | protein_length=577 | sequence_SO=chromosome | SO=protein_coding_gene | is_pseudo=false	0.052	FALSE	1.646	1	1	1	1	577	64.7	8.63	0	1	1.411	0.5	0.834355	294585	415623	NA	NA	1	1	294585	NA	415623	NA	277957	NA	363638	NA	1	NA	1	NA	Peak Found	Not Found	High	Not Found	1
TGGT1_233100	transcript=TGGT1_233100-t26_1 | gene=TGGT1_233100 | organism=Toxoplasma_gondii_GT1 | gene_product=Prohibitin [Source:UniProtKB/TrEMBL;Acc:A0A125YWW3] | transcript_product=SPFH domain / Band 7 family protein | location=TGGT1_chrVIII:2412652-2416916(-) | protein_length=290 | sequence_SO=chromosome | SO=protein_coding_gene | is_pseudo=false	0	FALSE	10.654	10	3	8	3	290	32	9.33	3.98	3	1.41	0.5	0.834355	709825	1.00088e+06	70.11	21.16	2	2	1.2225e+06	412148	860812	1.16374e+06	1.1535e+06	412148	753144	714703	3	2	2	3	High	Peak Found	High	High	1
TGGT1_245460	transcript=TGGT1_245460-t26_1 | gene=TGGT1_245460 | organism=Toxoplasma_gondii_GT1 | gene_product=40S ribosomal protein S8 [Source:UniProtKB/TrEMBL;Acc:S7WHE0] | transcript_product=ribosomal protein RPS8 | location=TGGT1_chrXII:2220293-2224095(-) | protein_length=205 | sequence_SO=chromosome | SO=protein_coding_gene | is_pseudo=false	0	FALSE	56.57	54	10	64	10	205	23.4	10.64	98.7	10	1.407	0.49	0.836575	7.4905e+07	1.054e+08	6.5	32.26	2	2	7.15372e+07	7.84313e+07	1.32948e+08	8.35602e+07	6.74992e+07	7.84313e+07	1.1632e+08	5.13178e+07	10	10	10	10	High	High	High	High	1	Methylthio [C142; C171]
TGGT1_203490	transcript=TGGT1_203490-t26_1 | gene=TGGT1_203490 | organism=Toxoplasma_gondii_GT1 | gene_product=GNL3L/Grn1 GTPase [Source:UniProtKB/TrEMBL;Acc:S7UUZ9] | transcript_product=GNL3L/Grn1 GTPase | location=TGGT1_chrVIIa:2373071-2378820(+) | protein_length=701 | sequence_SO=chromosome | SO=protein_coding_gene | is_pseudo=false	0	FALSE	6.688	4	2	3	2	701	76.2	9.6	4.18	2	1.407	0.49	0.836575	243024	341879	8.34	52.75	2	2	257799	229097	505894	231040	243247	229097	442619	141891	1	1	1	1	High	High	High	Peak Found	1
TGGT1_218520	transcript=TGGT1_218520-t26_1 | gene=TGGT1_218520 | organism=Toxoplasma_gondii_GT1 | gene_product=Microneme protein MIC6 [Source:UniProtKB/TrEMBL;Acc:S7V1D9] | transcript_product=microneme protein MIC6 | location=TGGT1_chrXII:1418869-1419918(-) | protein_length=349 | sequence_SO=chromosome | SO=protein_coding_gene | is_pseudo=false	0	FALSE	67.5	40	13	145	13	349	36.6	4.69	167.86	13	1.406	0.49	0.836849	4.97429e+07	6.99357e+07	58.07	37.16	2	2	3.21533e+07	7.69549e+07	5.34369e+07	9.15286e+07	3.03384e+07	7.69549e+07	4.67532e+07	5.62115e+07	11	12	11	12	High	High	High	High	1	Methylthio [C122; C140; C148; C153; C162; C191]
TGGT1_261850	transcript=TGGT1_261850-t26_1 | gene=TGGT1_261850 | organism=Toxoplasma_gondii_GT1 | gene_product=SF4 helicase domain-containing protein [Source:UniProtKB/TrEMBL;Acc:S7UY39] | transcript_product=putative helicase | location=TGGT1_chrVIIb:1475197-1495533(-) | protein_length=2579 | sequence_SO=chromosome | SO=protein_coding_gene | is_pseudo=false	0.063	FALSE	1.497	0	1	2	1	2579	279	8.19	0	1	1.403	0.49	0.842445	329778	462734	86.63	109.02	2	2	672779	161648	1.28649e+06	166440	634803	161648	1.12558e+06	102218	1	1	1	1	High	Peak Found	High	Peak Found	1	Phospho [T2551]
TGGT1_203600	transcript=TGGT1_203600-t26_1 | gene=TGGT1_203600 | organism=Toxoplasma_gondii_GT1 | gene_product=hypothetical protein | transcript_product=hypothetical protein | location=TGGT1_chrVIIa:2307958-2309277(-) | protein_length=439 | sequence_SO=chromosome | SO=protein_coding_gene | is_pseudo=false	0	FALSE	35.201	32	9	20	9	439	47.3	8.25	24.68	9	1.403	0.49	0.842445	3.42678e+06	4.80768e+06	72.81	71.67	2	2	6.05494e+06	1.93938e+06	8.40276e+06	2.75073e+06	5.71316e+06	1.93938e+06	7.35177e+06	1.68934e+06	9	7	9	8	High	High	High	High	1	Methylthio [C199; C407]
TGGT1_310780	transcript=TGGT1_310780-t26_1 | gene=TGGT1_310780 | organism=Toxoplasma_gondii_GT1 | gene_product=Dense granule protein GRA4 [Source:UniProtKB/TrEMBL;Acc:S7UT91] | transcript_product=dense granule protein GRA4 | location=TGGT1_chrXI:1552761-1553798(-) | protein_length=345 | sequence_SO=chromosome | SO=protein_coding_gene | is_pseudo=false	0	FALSE	14.983	20	3	10	3	345	36.3	7.56	4.46	3	1.399	0.48	0.847125	1.58378e+06	2.21602e+06	15.44	24.73	2	2	1.41934e+06	1.76728e+06	1.85718e+06	2.6442e+06	1.33922e+06	1.76728e+06	1.62489e+06	1.62392e+06	3	3	3	3	High	High	High	High	1
TGGT1_233000	transcript=TGGT1_233000-t26_1 | gene=TGGT1_233000 | organism=Toxoplasma_gondii_GT1 | gene_product=KOW motif domain-containing protein [Source:UniProtKB/TrEMBL;Acc:S7V342] | transcript_product=KOW motif domain-containing protein | location=TGGT1_chrVIII:2313902-2327775(-) | protein_length=1179 | sequence_SO=chromosome | SO=protein_coding_gene | is_pseudo=false	0	FALSE	8.21	2	2	3	2	1179	127.2	5.81	0	2	1.399	0.48	0.847125	184162	257611	47.35	93.74	2	2	260873	130008	572115	115996	246148	130008	500557	71238.2	2	2	2	1	High	Peak Found	High	High	1
TGGT1_248340	transcript=TGGT1_248340-t26_1 | gene=TGGT1_248340 | organism=Toxoplasma_gondii_GT1 | gene_product=GTP-binding nuclear protein [Source:UniProtKB/TrEMBL;Acc:S7V0L0] | transcript_product=GTP-binding nuclear protein ran/tc4 | location=TGGT1_chrXII:3749189-3752256(+) | protein_length=229 | sequence_SO=chromosome | SO=protein_coding_gene | is_pseudo=false	0	FALSE	30.796	34	7	35	7	229	26	8.65	64.51	7	1.396	0.48	0.847125	2.38088e+07	3.32375e+07	1.7	29.23	2	2	2.35237e+07	2.40972e+07	4.09912e+07	2.69505e+07	2.21959e+07	2.40972e+07	3.58642e+07	1.65514e+07	6	7	6	7	High	High	High	High	1
TGGT1_229480	transcript=TGGT1_229480-t26_1 | gene=TGGT1_229480 | organism=Toxoplasma_gondii_GT1 | gene_product=Putative calcium binding protein [Source:UniProtKB/TrEMBL;Acc:S7V2K1] | transcript_product=putative calcium binding protein precursor | location=TGGT1_chrVIII:289042-291582(-) | protein_length=335 | sequence_SO=chromosome | SO=protein_coding_gene | is_pseudo=false	0	FALSE	24.388	33	8	20	8	335	38.3	4.69	19.63	8	1.393	0.48	0.847125	5.1744e+06	7.20908e+06	77.56	20.51	2	2	9.58164e+06	2.79434e+06	8.3426e+06	6.22958e+06	9.04079e+06	2.79434e+06	7.29914e+06	3.82584e+06	8	7	8	7	High	High	High	High	1
TGGT1_259240	transcript=TGGT1_259240-t26_1 | gene=TGGT1_259240 | organism=Toxoplasma_gondii_GT1 | gene_product=40S ribosomal protein S21 [Source:UniProtKB/TrEMBL;Acc:S7WEL7] | transcript_product=ribosomal protein RPS21 | location=TGGT1_chrVIIb:2808644-2809838(-) | protein_length=82 | sequence_SO=chromosome | SO=protein_coding_gene | is_pseudo=false	0	FALSE	11.652	30	2	8	2	82	9	8.05	19.23	2	1.392	0.48	0.847125	1.99371e+06	2.77615e+06	16.35	12.3	2	2	2.23925e+06	1.7751e+06	2.54431e+06	3.02911e+06	2.11285e+06	1.7751e+06	2.22607e+06	1.8603e+06	2	2	2	2	High	High	High	High	1
TGGT1_223540	transcript=TGGT1_223540-t26_1 | gene=TGGT1_223540 | organism=Toxoplasma_gondii_GT1 | gene_product=Importin N-terminal domain-containing protein [Source:UniProtKB/TrEMBL;Acc:S7UWB9] | transcript_product=importin-beta N-terminal domain-containing protein | location=TGGT1_chrX:3650759-3662029(-) | protein_length=1095 | sequence_SO=chromosome | SO=protein_coding_gene | is_pseudo=false	0.058	FALSE	1.552	1	1	2	1	1095	122.1	4.77	0	1	1.391	0.48	0.847125	245305	341269	1.98	48.63	2	2	241888	248770	488397	238463	228234	248770	427310	146450	1	1	1	1	Peak Found	High	High	Peak Found	1
TGGT1_209950	transcript=TGGT1_209950-t26_1 | gene=TGGT1_209950 | organism=Toxoplasma_gondii_GT1 | gene_product=Thioredoxin domain-containing protein [Source:UniProtKB/TrEMBL;Acc:A0A125YJX1] | transcript_product=putative thioredoxin | location=TGGT1_chrIb:1585569-1589285(-) | protein_length=424 | sequence_SO=chromosome | SO=protein_coding_gene | is_pseudo=false	0	FALSE	9.361	9	4	7	4	424	47.7	8.34	0	4	1.39	0.48	0.847125	2.26388e+06	3.14687e+06	35.86	11.58	2	2	2.93384e+06	1.74691e+06	3.41591e+06	2.89902e+06	2.76824e+06	1.74691e+06	2.98866e+06	1780409	4	4	4	4	High	High	High	High	1	Methylthio [C288]
TGGT1_318160	transcript=TGGT1_318160-t26_1 | gene=TGGT1_318160 | organism=Toxoplasma_gondii_GT1 | gene_product=MSP domain-containing protein [Source:UniProtKB/TrEMBL;Acc:S7UKE9] | transcript_product=MSP (Major sperm protein) domain-containing protein | location=TGGT1_chrIV:1459846-1460565(+) | protein_length=239 | sequence_SO=chromosome | SO=protein_coding_gene | is_pseudo=false	0.003	FALSE	2.835	9	1	3	1	239	26	7.55	0	1	1.389	0.47	0.847125	150882	209520	37.05	26.1	2	2	197303	115383	173837	252527	186166	115383	152094	155087	1	1	1	1	High	Peak Found	High	High	1	Methylthio [C82]
TGGT1_240870	transcript=TGGT1_240870-t26_1 | gene=TGGT1_240870 | organism=Toxoplasma_gondii_GT1 | gene_product=AP complex subunit beta [Source:UniProtKB/TrEMBL;Acc:S7URG1] | transcript_product=putative beta adaptin protein | location=TGGT1_chrVI:1457492-1470206(+) | protein_length=924 | sequence_SO=chromosome | SO=protein_coding_gene | is_pseudo=false	0.001	FALSE	3.526	1	1	1	1	924	101.9	5.6	0	1	1.388	0.47	0.847125	220360	305951	41.87	NA	2	1	299015	162395	305951	NA	282137	162395	267684	NA	1	1	1	NA	Peak Found	Peak Found	High	Not Found	1
TGGT1_315320	transcript=TGGT1_315320-t26_1 | gene=TGGT1_315320 | organism=Toxoplasma_gondii_GT1 | gene_product=SAG-related sequence SRS52A [Source:UniProtKB/TrEMBL;Acc:S7UMK1] | transcript_product=SAG-related sequence SRS52A | location=TGGT1_chrXI:4594837-4596241(+) | protein_length=329 | sequence_SO=chromosome | SO=protein_coding_gene | is_pseudo=false	0	FALSE	28.142	37	8	19	8	329	34.2	5.52	17.58	8	1.388	0.47	0.847125	7.77697e+06	1.07936e+07	45.5	14.56	2	2	1.08562e+07	5.57112e+06	9.73418e+06	1.19683e+07	1.02434e+07	5.57112e+06	8.51667e+06	7.35023e+06	7	7	7	8	High	High	High	High	1	Methylthio [C44; C69; C268; C271]
TGGT1_248390	transcript=TGGT1_248390-t26_1 | gene=TGGT1_248390 | organism=Toxoplasma_gondii_GT1 | gene_product=KOW domain-containing protein [Source:UniProtKB/TrEMBL;Acc:A0A125YI79] | transcript_product=ribosomal protein RPL26 | location=TGGT1_chrXII:3763041-3764059(-) | protein_length=141 | sequence_SO=chromosome | SO=protein_coding_gene | is_pseudo=false	0	FALSE	17.462	33	6	31	6	141	16.3	10.64	57.49	6	1.385	0.47	0.848623	5.57179e+07	7.71951e+07	4.86	32.85	2	2	5.3834e+07	5.76677e+07	9.78016e+07	6.09303e+07	5.07953e+07	5.76677e+07	85568875	3.74198e+07	6	6	6	6	High	High	High	High	1	Methylthio [C35]
TGGT1_318230	transcript=TGGT1_318230-t26_1 | gene=TGGT1_318230 | organism=Toxoplasma_gondii_GT1 | gene_product=Phosphoglycerate kinase [Source:UniProtKB/TrEMBL;Acc:S7VZ21] | transcript_product=phosphoglycerate kinase PGKI | location=TGGT1_chrIV:1413955-1416908(+) | protein_length=417 | sequence_SO=chromosome | SO=protein_coding_gene | is_pseudo=false	0	FALSE	6.036	6	3	3	3	417	44.6	6.99	0	3	1.385	0.47	0.848623	2.21526e+06	3.06896e+06	0.36	18.96	2	2	2.20964e+06	2.22089e+06	3.51202e+06	2.6818e+06	2.08491e+06	2.22089e+06	3.07275e+06	1.647e+06	2	1	2	3	Peak Found	Peak Found	Peak Found	High	1
TGGT1_247460	transcript=TGGT1_247460-t26_1 | gene=TGGT1_247460 | organism=Toxoplasma_gondii_GT1 | gene_product=Proliferating cell nuclear antigen [Source:UniProtKB/TrEMBL;Acc:A0A125YTT0] | transcript_product=proliferating cell nuclear antigen PCNA1 | location=TGGT1_chrXII:3286520-3289072(-) | protein_length=317 | sequence_SO=chromosome | SO=protein_coding_gene | is_pseudo=false	0	FALSE	6.006	7	2	5	2	317	34.5	4.73	0	2	1.384	0.47	0.849461	516150	714437	24.24	24.74	2	2	613723	434090	852536	598709	579080	434090	745903	367692	2	2	2	2	High	High	High	High	1	Methylthio [C76]
TGGT1_280710	transcript=TGGT1_280710-t26_1 | gene=TGGT1_280710 | organism=Toxoplasma_gondii_GT1 | gene_product=Proteasome subunit beta [Source:UniProtKB/TrEMBL;Acc:S7UUN4] | transcript_product=putative 20S proteasome subunit beta 7 | location=TGGT1_chrVIIa:136134-140480(-) | protein_length=266 | sequence_SO=chromosome | SO=protein_coding_gene | is_pseudo=false	0.033	FALSE	1.793	3	1	1	1	266	30.2	6.04	0	1	1.384	0.47	0.849461	86441.1	119613	NA	27.29	1	2	86441.1	NA	98377.7	145432	81561.8	NA	86073	89315.7	1	NA	1	1	Peak Found	Not Found	Peak Found	High	1
TGGT1_215940	transcript=TGGT1_215940-t26_1 | gene=TGGT1_215940 | organism=Toxoplasma_gondii_GT1 | gene_product=Putative Acetyl-coenzyme A transporter [Source:UniProtKB/TrEMBL;Acc:A0A125YUW6] | transcript_product=putative Acetyl-coenzyme A transporter | location=TGGT1_chrXI:6430488-6438193(-) | protein_length=605 | sequence_SO=chromosome | SO=protein_coding_gene | is_pseudo=false	0.001	FALSE	3.968	2	1	1	1	605	65.4	5.8	0	1	1.381	0.47	0.850307	147253	203359	5.83	22.26	2	2	153454	141303	238345	173509	144792	141303	208533	106559	1	1	1	1	Peak Found	Peak Found	High	Peak Found	1
TGGT1_291890	transcript=TGGT1_291890-t26_1 | gene=TGGT1_291890 | organism=Toxoplasma_gondii_GT1 | gene_product=TgMIC1 domain-containing protein [Source:UniProtKB/TrEMBL;Acc:S7VXI3] | transcript_product=microneme protein MIC1 | location=TGGT1_chrIX:4200849-4203191(-) | protein_length=456 | sequence_SO=chromosome | SO=protein_coding_gene | is_pseudo=false	0	FALSE	120.701	57	20	155	20	456	48.6	5.34	339.28	20	1.381	0.47	0.850307	3.62976e+08	5.01104e+08	56	39.24	2	2	2.38757e+08	5.51824e+08	3.76851e+08	6.66327e+08	2.2528e+08	5.51824e+08	3.29715e+08	4.09219e+08	19	21	20	21	High	High	High	High	1	Methylthio [C45; C53; C61; C85; C103; C107; C113; C143; C236; C242; C252; C354]
TGGT1_319350	transcript=TGGT1_319350-t26_1 | gene=TGGT1_319350 | organism=Toxoplasma_gondii_GT1 | gene_product=SAG domain-containing protein [Source:UniProtKB/TrEMBL;Acc:A0A125YRK7] | transcript_product=SAG-related sequence SRS17B | location=TGGT1_chrIV:957373-958987(+) | protein_length=379 | sequence_SO=chromosome | SO=protein_coding_gene | is_pseudo=false	0.014	FALSE	2.149	2	1	1	1	379	39.4	5.02	0	1	1.375	0.46	0.855968	152382	209585	83.84	48.7	2	2	301401	77041.5	146368	300105	284388	77041.5	128061	184307	1	1	1	1	High	Peak Found	Peak Found	Peak Found	1
TGGT1_268850	transcript=TGGT1_268850-t26_1 | gene=TGGT1_268850 | organism=Toxoplasma_gondii_GT1 | gene_product=Enolase 2 [Source:UniProtKB/TrEMBL;Acc:A0A125YLV4] | transcript_product=enolase 2 | location=TGGT1_chrVIII:6248823-6250901(-) | protein_length=475 | sequence_SO=chromosome | SO=protein_coding_gene | is_pseudo=false	0	FALSE	24.065	23	7	16	7	475	52.1	6.84	6.35	7	1.374	0.46	0.855968	3.75432e+06	5.15783e+06	34.68	38.81	2	2	4.82212e+06	2.92297e+06	3.89191e+06	6.83551e+06	4.54993e+06	2.92297e+06	3.40512e+06	4.19797e+06	7	7	7	7	High	High	High	High	1	Methylthio [C138; C464]
TGGT1_318525	transcript=TGGT1_318525-t26_1 | gene=TGGT1_318525 | organism=Toxoplasma_gondii_GT1 | gene_product=hypothetical protein | transcript_product=hypothetical protein | location=TGGT1_chrIV:1192489-1200329(-) | protein_length=1182 | sequence_SO=chromosome | SO=protein_coding_gene | is_pseudo=false	0.062	FALSE	1.517	3	1	1	1	1182	127.8	8.22	0	1	1.371	0.45	0.863441	545213	747260	10.79	12.75	2	2	588535	505080	682661	817973	555315	505080	597276	502351	1	1	1	1	Peak Found	Peak Found	Peak Found	High	1
TGGT1_310490	transcript=TGGT1_310490-t26_1 | gene=TGGT1_310490 | organism=Toxoplasma_gondii_GT1 | gene_product=Ribosomal_L18e/L15P domain-containing protein [Source:UniProtKB/TrEMBL;Acc:A0A125YTM1] | transcript_product=ribosomal protein RPL27A | location=TGGT1_chrXI:1345590-1346369(-) | protein_length=147 | sequence_SO=chromosome | SO=protein_coding_gene | is_pseudo=false	0	FALSE	13.294	27	4	18	4	147	16.3	10.45	44.75	4	1.367	0.45	0.864531	4.31285e+07	5.89764e+07	15.42	23.38	2	2	4.81194e+07	3.86552e+07	6.96858e+07	4.99128e+07	45403257	3.86552e+07	6.09697e+07	3.06536e+07	4	4	4	4	High	High	High	High	1	Methylthio [C70]
TGGT1_205700	transcript=TGGT1_205700-t26_1 | gene=TGGT1_205700 | organism=Toxoplasma_gondii_GT1 | gene_product=PPIase cyclophilin-type domain-containing protein [Source:UniProtKB/TrEMBL;Acc:A0A125YTE9] | transcript_product=cyclophilin precursor | location=TGGT1_chrVIIa:1122121-1123167(+) | protein_length=348 | sequence_SO=chromosome | SO=protein_coding_gene | is_pseudo=false	0	FALSE	17.617	11	4	14	4	348	38.2	8.75	24.79	4	1.367	0.45	0.864531	4.68185e+06	6.39916e+06	19.22	40.02	2	2	5.36786e+06	4.08352e+06	4.78377e+06	8.56003e+06	5.06486e+06	4.08352e+06	4.18544e+06	5.25707e+06	4	4	4	4	High	High	High	High	1
TGGT1_225160	transcript=TGGT1_225160-t26_1 | gene=TGGT1_225160 | organism=Toxoplasma_gondii_GT1 | gene_product=hypothetical protein | transcript_product=hypothetical protein | location=TGGT1_chrX:2354594-2355799(+) | protein_length=401 | sequence_SO=chromosome | SO=protein_coding_gene | is_pseudo=false	0	FALSE	7.607	6	2	3	2	401	45.4	9.25	0	2	1.366	0.45	0.864589	282684	386049	85.98	102.83	2	2	572529	139574	971181	153456	540212	139574	849709	94243.9	2	1	2	1	High	Peak Found	High	Peak Found	1
TGGT1_300000	transcript=TGGT1_300000-t26_1 | gene=TGGT1_300000 | organism=Toxoplasma_gondii_GT1 | gene_product=Ribosomal_L18e/L15P domain-containing protein [Source:UniProtKB/TrEMBL;Acc:A0A125YRB0] | transcript_product=ribosomal protein RPL18 | location=TGGT1_chrXII:251803-254851(+) | protein_length=187 | sequence_SO=chromosome | SO=protein_coding_gene | is_pseudo=false	0	FALSE	25.436	27	5	38	5	187	21.2	11.52	50.15	5	1.365	0.45	0.864589	2.57701e+07	3.51878e+07	10.28	54.99	2	2	2.39598e+07	2.77172e+07	5.30425e+07	2.33432e+07	2.26073e+07	2.77172e+07	4.64081e+07	1.43361e+07	4	5	4	5	High	High	High	High	1	Methylthio [C119]
TGGT1_239100	transcript=TGGT1_239100-t26_1 | gene=TGGT1_239100 | organism=Toxoplasma_gondii_GT1 | gene_product=40S ribosomal protein S7 [Source:UniProtKB/TrEMBL;Acc:A0A125YZ18] | transcript_product=ribosomal protein RPS7 | location=TGGT1_chrVI:457170-458270(+) | protein_length=196 | sequence_SO=chromosome | SO=protein_coding_gene | is_pseudo=false	0	FALSE	23.294	47	8	30	8	196	22.6	9.86	56.41	8	1.363	0.45	0.86692	2.33691e+07	3.18585e+07	19.57	6.64	2	2	2.68611e+07	2.03311e+07	3.3392e+07	3.03955e+07	2.53449e+07	2.03311e+07	2.92154e+07	1.86672e+07	8	8	8	8	High	High	High	High	1
TGGT1_226410	transcript=TGGT1_226410-t26_1 | gene=TGGT1_226410 | organism=Toxoplasma_gondii_GT1 | gene_product=EF1_GNE domain-containing protein [Source:UniProtKB/TrEMBL;Acc:S7UX25] | transcript_product=EF-1 guanine nucleotide exchange domain-containing protein | location=TGGT1_chrX:1563878-1565889(-) | protein_length=328 | sequence_SO=chromosome | SO=protein_coding_gene | is_pseudo=false	0	FALSE	18.473	20	6	14	6	328	36	5.16	23.74	6	1.363	0.45	0.86692	4.39231e+06	5.98486e+06	47.71	25.47	2	2	6.24013e+06	3.09167e+06	4.98863e+06	7.18004e+06	5.88789e+06	3.09167e+06	4.36467e+06	4.40956e+06	6	6	6	6	High	High	High	High	1
TGGT1_275810	transcript=TGGT1_275810-t26_1 | gene=TGGT1_275810 | organism=Toxoplasma_gondii_GT1 | gene_product=S10_plectin domain-containing protein [Source:UniProtKB/TrEMBL;Acc:A0A125YIP7] | transcript_product=ribosomal protein RPS10 | location=TGGT1_chrIII:201999-204232(+) | protein_length=152 | sequence_SO=chromosome | SO=protein_coding_gene | is_pseudo=false	0	FALSE	9.707	23	3	10	3	152	17.4	10.14	11.44	3	1.36	0.44	0.873923	2.82437e+06	3.84033e+06	43.64	11.97	2	2	3.88553e+06	2.05302e+06	3.52801e+06	4.18031e+06	3.66621e+06	2.05302e+06	3.08674e+06	2.5673e+06	3	3	3	3	High	High	High	High	1
TGGT1_245680	transcript=TGGT1_245680-t26_1 | gene=TGGT1_245680 | organism=Toxoplasma_gondii_GT1 | gene_product=Ribosomal protein RPL21 [Source:UniProtKB/TrEMBL;Acc:S7WHD1] | transcript_product=ribosomal protein RPL21 | location=TGGT1_chrXII:2403148-2403621(+) | protein_length=157 | sequence_SO=chromosome | SO=protein_coding_gene | is_pseudo=false	0	FALSE	20.51	32	5	44	5	157	17.9	10.35	65.15	5	1.359	0.44	0.87507	4.89706e+07	6.65392e+07	4.44	32.72	2	2	5.05345e+07	4.74551e+07	8.42204e+07	5.257e+07	4.7682e+07	4.74551e+07	7.36864e+07	3.22854e+07	5	5	5	5	High	High	High	High	1	Methylthio [C44; C101]
TGGT1_262490	transcript=TGGT1_262490-t26_1 | gene=TGGT1_262490 | organism=Toxoplasma_gondii_GT1 | gene_product=AB hydrolase-1 domain-containing protein [Source:UniProtKB/TrEMBL;Acc:S7UYC4] | transcript_product=putative alpha/beta hydrolase | location=TGGT1_chrVIIb:1184618-1187285(-) | protein_length=260 | sequence_SO=chromosome | SO=protein_coding_gene | is_pseudo=false	0.061	FALSE	1.527	5	1	1	1	260	29.1	8.65	0	1	1.357	0.44	0.876039	136224	184913	23.12	43.3	2	2	160660	115505	253706	134773	151591	115505	221973	82769.7	1	1	1	1	Peak Found	Peak Found	High	Peak Found	1	Methylthio [C178]
TGGT1_209290	transcript=TGGT1_209290-t26_1 | gene=TGGT1_209290 | organism=Toxoplasma_gondii_GT1 | gene_product=Ribosomal protein RPS28 [Source:UniProtKB/TrEMBL;Acc:S7UIH9] | transcript_product=ribosomal protein RPS28 | location=TGGT1_chrIb:1207027-1207383(-) | protein_length=118 | sequence_SO=chromosome | SO=protein_coding_gene | is_pseudo=false	0	FALSE	11.624	25	3	8	3	118	13.2	10.76	15.21	3	1.352	0.44	0.876039	281163	380270	3.19	10.56	2	2	287576	274892	409804	352863	271344	274892	358547	216708	1	2	1	2	High	High	High	High	1
TGGT1_231960	transcript=TGGT1_231960-t26_1 | gene=TGGT1_231960 | organism=Toxoplasma_gondii_GT1 | gene_product=Putative omega secalin [Source:UniProtKB/TrEMBL;Acc:S7WBR2] | transcript_product=putative omega secalin | location=TGGT1_chrVIII:1668838-1672885(-) | protein_length=1111 | sequence_SO=chromosome | SO=protein_coding_gene | is_pseudo=false	0	FALSE	8.079	3	2	4	2	1111	119.6	8.98	0	2	1.351	0.43	0.876039	729137	985331	38.75	26.09	2	2	550419	965882	1.18746e+06	817612	519350	965882	1.03893e+06	502129	3	3	3	3	Peak Found	High	High	Peak Found	1	Phospho [S490]
TGGT1_242640	transcript=TGGT1_242640-t26_1 | gene=TGGT1_242640 | organism=Toxoplasma_gondii_GT1 | gene_product=hypothetical protein | transcript_product=hypothetical protein | location=TGGT1_chrVI:2052268-2065545(-) | protein_length=3106 | sequence_SO=chromosome | SO=protein_coding_gene | is_pseudo=false	0.009	FALSE	2.262	0	1	1	1	3106	328.8	7.81	1.61	1	1.351	0.43	0.876039	6.26288e+06	8.46016e+06	NA	32.58	1	2	6.26288e+06	NA	6.69108e+06	1.0697e+07	5909366	NA	5854183	6569461	1	NA	1	1	Peak Found	Not Found	Peak Found	High	1
TGGT1_243760	transcript=TGGT1_243760-t26_1 | gene=TGGT1_243760 | organism=Toxoplasma_gondii_GT1 | gene_product=TLC domain-containing protein [Source:UniProtKB/TrEMBL;Acc:S7UFR6] | transcript_product=hypothetical protein | location=TGGT1_chrVI:2759731-2762020(-) | protein_length=435 | sequence_SO=chromosome | SO=protein_coding_gene | is_pseudo=false	0.039	FALSE	1.738	2	1	4	1	435	49.2	9.11	5.17	1	1.349	0.43	0.876039	1.07796e+07	1.45379e+07	37.14	9.47	2	2	1.41055e+07	8237954	1.35953e+07	1.55458e+07	13309312	8237954	11894852	9547334	1	1	1	1	High	High	High	High	1
TGGT1_314418	transcript=TGGT1_314418-t26_1 | gene=TGGT1_314418 | organism=Toxoplasma_gondii_GT1 | gene_product=AP complex subunit sigma [Source:UniProtKB/TrEMBL;Acc:A0A125YX12] | transcript_product=clathrin adaptor complex small chain family protein | location=TGGT1_chrXI:4051911-4052980(-) | protein_length=145 | sequence_SO=chromosome | SO=protein_coding_gene | is_pseudo=false	0.066	FALSE	1.477	6	1	1	1	145	17	5.31	0	1	1.348	0.43	0.876039	110745	149231	NA	NA	1	1	110745	NA	149231	NA	104494	NA	130566	NA	1	NA	1	NA	Peak Found	Not Found	High	Not Found	1
TGGT1_210690	transcript=TGGT1_210690-t26_1 | gene=TGGT1_210690 | organism=Toxoplasma_gondii_GT1 | gene_product=40S ribosomal protein S6 [Source:UniProtKB/TrEMBL;Acc:A0A125YZ10] | transcript_product=ribosomal protein RPS6 | location=TGGT1_chrIV:2087216-2087986(+) | protein_length=256 | sequence_SO=chromosome | SO=protein_coding_gene | is_pseudo=false	0	FALSE	48.245	23	6	57	6	256	28.9	10.8	132.43	6	1.347	0.43	0.876039	2.77502e+07	3.73775e+07	0.88	33.76	2	2	2.79244e+07	2.75772e+07	4.76799e+07	2.93012e+07	26348141	2.75772e+07	4.17163e+07	1.79951e+07	7	8	8	8	High	High	High	High	1
TGGT1_291850	transcript=TGGT1_291850-t26_1 | gene=TGGT1_291850 | organism=Toxoplasma_gondii_GT1 | gene_product=40S ribosomal protein S30 [Source:UniProtKB/TrEMBL;Acc:A0A125YL31] | transcript_product=ribosomal protein RPS30 | location=TGGT1_chrIX:4188261-4188848(-) | protein_length=59 | sequence_SO=chromosome | SO=protein_coding_gene | is_pseudo=false	0.004	FALSE	2.65	14	1	1	1	59	6.6	12.41	3	1	1.344	0.43	0.879178	1.52459e+06	2.04942e+06	11.53	74.77	2	2	1.40496e+06	1.6544e+06	1.13793e+06	3.691e+06	1.32566e+06	1.6544e+06	995605	2266797	1	1	1	1	Peak Found	Peak Found	Peak Found	High	1
TGGT1_254440	transcript=TGGT1_254440-t26_1 | gene=TGGT1_254440 | organism=Toxoplasma_gondii_GT1 | gene_product=Ribosomal protein RPL12 [Source:UniProtKB/TrEMBL;Acc:A0A125YT48] | transcript_product=ribosomal protein RPL12 | location=TGGT1_chrIII:1720222-1723221(-) | protein_length=165 | sequence_SO=chromosome | SO=protein_coding_gene | is_pseudo=false	0	FALSE	8.287	16	2	5	2	165	17.8	9.42	10.35	2	1.343	0.43	0.880404	1.21033e+06	1.62583e+06	27.77	19.51	2	2	1.47679e+06	991948	1.41509e+06	1.86797e+06	1.39343e+06	991948	1.23809e+06	1.1472e+06	2	2	2	2	High	High	High	High	1
TGGT1_285240	transcript=TGGT1_285240-t26_1 | gene=TGGT1_285240 | organism=Toxoplasma_gondii_GT1 | gene_product=S5A_REDUCTASE domain-containing protein [Source:UniProtKB/TrEMBL;Acc:A0A125YK59] | transcript_product=3-oxo-5-alpha-steroid 4-dehydrogenase | location=TGGT1_chrV:2347912-2353553(-) | protein_length=347 | sequence_SO=chromosome | SO=protein_coding_gene | is_pseudo=false	0.002	FALSE	3.004	3	1	4	1	347	40.1	10.87	0	1	1.342	0.42	0.884002	296809	398213	41.3	67.61	2	2	400969	219707	670145	236625	378336	219707	586326	145321	1	1	1	1	High	High	High	High	1
TGGT1_278050	transcript=TGGT1_278050-t26_1 | gene=TGGT1_278050 | organism=Toxoplasma_gondii_GT1 | gene_product=Proteasome endopeptidase complex [Source:UniProtKB/TrEMBL;Acc:S7V092] | transcript_product=putative proteasome subunit alpha type 1 | location=TGGT1_chrXII:6244565-6249677(-) | protein_length=247 | sequence_SO=chromosome | SO=protein_coding_gene | is_pseudo=false	0.007	FALSE	2.45	7	1	1	1	247	27.2	6.15	0	1	1.341	0.42	0.884002	198445	266078	36.32	18.65	2	2	258070	152596	233025	303819	243503	152596	203879	186588	1	1	1	1	Peak Found	Peak Found	Peak Found	High	1
TGGT1_253615	transcript=TGGT1_253615-t26_1 | gene=TGGT1_253615 | organism=Toxoplasma_gondii_GT1 | gene_product=hypothetical protein | transcript_product=hypothetical protein | location=TGGT1_chrIII:1041445-1054905(-) | protein_length=2436 | sequence_SO=chromosome | SO=protein_coding_gene | is_pseudo=false	0.025	FALSE	1.911	0	1	1	1	2436	266.3	7.31	0	1	1.34	0.42	0.884002	3.54942e+06	4.75798e+06	9.36	21.21	2	2	3.32175e+06	3792694	5.53402e+06	4.09077e+06	3.13425e+06	3792694	4.84184e+06	2.51231e+06	1	1	1	1	Peak Found	Peak Found	High	Peak Found	1
TGGT1_256990	transcript=TGGT1_256990-t26_1 | gene=TGGT1_256990 | organism=Toxoplasma_gondii_GT1 | gene_product=AA_TRNA_LIGASE_II domain-containing protein [Source:UniProtKB/TrEMBL;Acc:S7UYX0] | transcript_product=glycyl-tRNA synthetase | location=TGGT1_chrVIIb:4226828-4230134(+) | protein_length=771 | sequence_SO=chromosome | SO=protein_coding_gene | is_pseudo=false	0.022	FALSE	1.987	1	1	1	1	771	86.3	7.33	0	1	1.338	0.42	0.8894	251801	336874	43.17	9.58	2	2	345139	183705	314783	360516	325657	183705	275411	221408	1	1	1	1	Peak Found	Peak Found	Peak Found	High	1
TGGT1_249990	transcript=TGGT1_249990-t26_1 | gene=TGGT1_249990 | organism=Toxoplasma_gondii_GT1 | gene_product=hypothetical protein | transcript_product=hypothetical protein | location=TGGT1_chrXII:4909167-4913985(-) | protein_length=838 | sequence_SO=chromosome | SO=protein_coding_gene | is_pseudo=false	0	FALSE	11.817	7	5	10	5	838	92.7	8.25	3.45	5	1.337	0.42	0.89038	855422	1.14344e+06	64.33	54.31	2	2	1.39746e+06	523625	1.71403e+06	762792	1.31858e+06	523625	1.49965e+06	468462	4	3	4	4	High	High	High	Peak Found	1
TGGT1_219800	transcript=TGGT1_219800-t26_1 | gene=TGGT1_219800 | organism=Toxoplasma_gondii_GT1 | gene_product=Vacuolar proton pump subunit B [Source:UniProtKB/TrEMBL;Acc:A0A125YPJ0] | transcript_product=putative vacuolar ATP synthase subunit b | location=TGGT1_chrXII:574692-577426(+) | protein_length=505 | sequence_SO=chromosome | SO=protein_coding_gene | is_pseudo=false	0	FALSE	10.806	9	3	7	3	505	56.6	5.4	0	3	1.336	0.42	0.89038	621985	831203	32.98	4.79	2	2	788810	490442	859875	803488	744285	490442	752325	493455	3	3	3	3	High	High	High	High	1	Methylthio [C139; C145]
TGGT1_289530	transcript=TGGT1_289530-t26_1 | gene=TGGT1_289530 | organism=Toxoplasma_gondii_GT1 | gene_product=Ribosomal_L19e domain-containing protein [Source:UniProtKB/TrEMBL;Acc:A0A125YMW0] | transcript_product=ribosomal protein RPL19 | location=TGGT1_chrIX:3095967-3098521(-) | protein_length=187 | sequence_SO=chromosome | SO=protein_coding_gene | is_pseudo=false	0	FALSE	18.071	20	5	24	5	187	22.1	11.15	31.78	5	1.336	0.42	0.890733	3.20522e+07	4.28111e+07	21.09	21.65	2	2	3.72498e+07	2.75799e+07	4.99554e+07	3.66885e+07	3.51472e+07	2.75799e+07	4.37071e+07	2.2532e+07	5	5	5	5	High	High	High	High	1
TGGT1_229250A	transcript=TGGT1_229250A-t26_1 | gene=TGGT1_229250A | organism=Toxoplasma_gondii_GT1 | gene_product=Ribosomal_L28e domain-containing protein [Source:UniProtKB/TrEMBL;Acc:S7V393] | transcript_product=ribosomal protein RPL28 | location=TGGT1_chrVIII:108601-108824(-) | protein_length=74 | sequence_SO=chromosome | SO=protein_coding_gene | is_pseudo=false	0	FALSE	18.203	50	3	21	3	74	8.3	10.29	40.14	3	1.333	0.41	0.898873	1.12163e+07	1.4946e+07	35.77	36.37	2	2	8.66102e+06	1.45254e+07	1.14885e+07	1.94441e+07	8.17214e+06	1.45254e+07	1.00516e+07	1.19415e+07	3	3	3	3	High	High	High	High	1	Methylthio [C10; C61]
TGGT1_239740	transcript=TGGT1_239740-t26_1 | gene=TGGT1_239740 | organism=Toxoplasma_gondii_GT1 | gene_product=Dense granule protein GRA14 [Source:UniProtKB/TrEMBL;Acc:A0A125YJW1] | transcript_product=dense granule protein GRA14 | location=TGGT1_chrVI:875718-876944(-) | protein_length=408 | sequence_SO=chromosome | SO=protein_coding_gene | is_pseudo=false	0	FALSE	33.216	27	9	22	9	408	44.7	8.5	30.08	9	1.332	0.41	0.898873	3.26711e+06	4.35078e+06	51.46	65.63	2	2	4.78406e+06	2.23116e+06	7.19094e+06	2.63238e+06	4.51402e+06	2.23116e+06	6.29152e+06	1.61665e+06	8	7	9	8	High	High	High	High	1
TGGT1_233450	transcript=TGGT1_233450-t26_1 | gene=TGGT1_233450 | organism=Toxoplasma_gondii_GT1 | gene_product=SAG-related sequence SRS29A [Source:UniProtKB/TrEMBL;Acc:S7V3P1] | transcript_product=SAG-related sequence SRS29A | location=TGGT1_chrVIII:2656903-2658165(+) | protein_length=420 | sequence_SO=chromosome | SO=protein_coding_gene | is_pseudo=false	0.001	FALSE	4.723	8	2	2	2	420	44.2	7.27	0	2	1.331	0.41	0.898873	272599	362711	NA	86.18	1	2	272599	NA	178694	736228	257212	NA	156343	452148	1	NA	1	2	High	Not Found	Peak Found	High	1	Methylthio [C218]
TGGT1_231850	transcript=TGGT1_231850-t26_1 | gene=TGGT1_231850 | organism=Toxoplasma_gondii_GT1 | gene_product=PPM-type phosphatase domain-containing protein [Source:UniProtKB/TrEMBL;Acc:A0A125YZ63] | transcript_product=serine-threonine phosophatase 2C (PP2C) | location=TGGT1_chrVIII:1583236-1586735(+) | protein_length=331 | sequence_SO=chromosome | SO=protein_coding_gene | is_pseudo=false	0	FALSE	14.251	14	4	12	4	331	36.8	5.71	4.77	4	1.327	0.41	0.909159	1.01641e+06	1.34904e+06	45.04	26.32	2	2	1.41371e+06	730760	1.11753e+06	1.62851e+06	1.33391e+06	730760	977749	1.00014e+06	3	3	3	3	High	High	High	High	1
TGGT1_290290	transcript=TGGT1_290290-t26_1 | gene=TGGT1_290290 | organism=Toxoplasma_gondii_GT1 | gene_product=UBA_e1_C domain-containing protein [Source:UniProtKB/TrEMBL;Acc:S7UQ93] | transcript_product=ubiquitin-activating enzyme E1 family protein | location=TGGT1_chrIX:3489378-3499339(+) | protein_length=1092 | sequence_SO=chromosome | SO=protein_coding_gene | is_pseudo=false	0.039	FALSE	1.738	2	1	2	1	1092	119.7	5.8	0	1	1.324	0.41	0.91381	137523	182107	43.42	3.59	2	2	188862	100139	177547	186784	178202	100139	155340	114712	1	1	1	1	High	Peak Found	Peak Found	High	1	Methylthio [C71]
TGGT1_319340	transcript=TGGT1_319340-t26_1 | gene=TGGT1_319340 | organism=Toxoplasma_gondii_GT1 | gene_product=hypothetical protein | transcript_product=hypothetical protein | location=TGGT1_chrIV:962742-964670(+) | protein_length=481 | sequence_SO=chromosome | SO=protein_coding_gene | is_pseudo=false	0	FALSE	15.777	11	5	12	5	481	52.4	5.87	11.95	5	1.324	0.41	0.91381	2.35874e+06	3.12332e+06	68.43	89.03	2	2	3.99936e+06	1.39114e+06	6.55086e+06	1.48913e+06	3.77361e+06	1.39114e+06	5.7315e+06	914538	5	5	5	5	High	High	High	High	1
TGGT1_258070	transcript=TGGT1_258070-t26_1 | gene=TGGT1_258070 | organism=Toxoplasma_gondii_GT1 | gene_product=hypothetical protein | transcript_product=hypothetical protein | location=TGGT1_chrVIIb:3570890-3578893(-) | protein_length=678 | sequence_SO=chromosome | SO=protein_coding_gene | is_pseudo=false	0	FALSE	7.422	3	2	2	2	678	75.7	8.73	1.83	2	1.323	0.4	0.91381	397140	525535	59.23	50.19	2	2	620522	254174	761634	362625	585495	254174	666371	222703	2	2	2	2	High	Peak Found	High	Peak Found	1
TGGT1_245620	transcript=TGGT1_245620-t26_1 | gene=TGGT1_245620 | organism=Toxoplasma_gondii_GT1 | gene_product=Ubiquitin-like domain-containing protein [Source:UniProtKB/TrEMBL;Acc:A0A125YIT6] | transcript_product=ribosomal-ubiquitin protein RPS27A | location=TGGT1_chrXII:2372961-2375071(-) | protein_length=154 | sequence_SO=chromosome | SO=protein_coding_gene | is_pseudo=false	0.002	FALSE	2.918	8	1	3	1	154	17.3	8.9	0	1	1.322	0.4	0.914712	411982	544501	50.78	49.42	2	2	599913	282923	378072	784192	566050	282923	330784	481605	1	1	1	1	High	Peak Found	High	High	1	Methylthio [C126]
TGGT1_224460	transcript=TGGT1_224460-t26_1 | gene=TGGT1_224460 | organism=Toxoplasma_gondii_GT1 | gene_product=Putative aminopeptidase n [Source:UniProtKB/TrEMBL;Acc:S7UWT6] | transcript_product=putative aminopeptidase n | location=TGGT1_chrX:2956872-2964821(+) | protein_length=970 | sequence_SO=chromosome | SO=protein_coding_gene | is_pseudo=false	0	FALSE	21.523	8	7	15	7	970	108.7	5.92	7.71	7	1.321	0.4	0.914712	1.54225e+06	2.03731e+06	48.08	21	2	2	2.19744e+06	1.08242e+06	2.366e+06	1.75428e+06	2.0734e+06	1.08242e+06	2.07007e+06	1.07738e+06	7	6	7	6	High	High	High	High	1
TGGT1_202530	transcript=TGGT1_202530-t26_1 | gene=TGGT1_202530 | organism=Toxoplasma_gondii_GT1 | gene_product=AA_TRNA_LIGASE_II domain-containing protein [Source:UniProtKB/TrEMBL;Acc:S7WAH7] | transcript_product=aspartate-tRNA ligase | location=TGGT1_chrVIIa:3153086-3158845(-) | protein_length=773 | sequence_SO=chromosome | SO=protein_coding_gene | is_pseudo=false	0.001	FALSE	3.687	3	2	3	2	773	86.7	8.22	0	2	1.318	0.4	0.920348	125036	164773	53.1	NA	2	1	185563	84251.9	164773	NA	175088	84251.9	144163	NA	1	1	1	NA	High	High	High	Not Found	1
TGGT1_218820	transcript=TGGT1_218820-t26_1 | gene=TGGT1_218820 | organism=Toxoplasma_gondii_GT1 | gene_product=Alba domain-containing protein [Source:UniProtKB/TrEMBL;Acc:A0A125YFQ6] | transcript_product=alba 2 | location=TGGT1_chrXII:1217304-1219105(+) | protein_length=148 | sequence_SO=chromosome | SO=protein_coding_gene | is_pseudo=false	0	FALSE	12.254	30	5	12	5	148	15.4	8.43	9.8	5	1.317	0.4	0.920455	6.20978e+06	8.17572e+06	8.75	23.21	2	2	6.60648e+06	5.83691e+06	6.92797e+06	9.64819e+06	6.23357e+06	5.83691e+06	6.06145e+06	5.92536e+06	5	5	5	5	High	High	High	High	1	Methylthio [C118]
TGGT1_231410	transcript=TGGT1_231410-t26_1 | gene=TGGT1_231410 | organism=Toxoplasma_gondii_GT1 | gene_product=hypothetical protein | transcript_product=hypothetical protein | location=TGGT1_chrVIII:1401693-1406022(+) | protein_length=571 | sequence_SO=chromosome | SO=protein_coding_gene | is_pseudo=false	0.001	FALSE	4.027	3	2	2	2	571	64.6	8.19	0	2	1.313	0.39	0.933107	227364	298483	119.97	60.33	2	2	793604	65138.9	470809	189232	748808	65138.9	411922	116215	2	1	2	2	High	Peak Found	Peak Found	Peak Found	1
TGGT1_266070	transcript=TGGT1_266070-t26_1 | gene=TGGT1_266070 | organism=Toxoplasma_gondii_GT1 | gene_product=Ribosomal protein RPL31 [Source:UniProtKB/TrEMBL;Acc:A0A125YYY2] | transcript_product=ribosomal protein RPL31 | location=TGGT1_chrIX:1142823-1144192(+) | protein_length=120 | sequence_SO=chromosome | SO=protein_coding_gene | is_pseudo=false	0	FALSE	11.395	28	3	9	3	120	14.3	10.68	7.8	3	1.312	0.39	0.934757	5.10083e+06	6.69122e+06	25.9	4.08	2	2	6.13888e+06	4.23831e+06	6.50089e+06	6.88712e+06	5.79237e+06	4.23831e+06	5.68778e+06	4.22966e+06	3	3	3	3	High	High	High	High	1
TGGT1_237140	transcript=TGGT1_237140-t26_1 | gene=TGGT1_237140 | organism=Toxoplasma_gondii_GT1 | gene_product=SOR_SNZ domain-containing protein [Source:UniProtKB/TrEMBL;Acc:S7UQ24] | transcript_product=putative ethylene inducible protein | location=TGGT1_chrX:5625979-5630291(+) | protein_length=307 | sequence_SO=chromosome | SO=protein_coding_gene | is_pseudo=false	0.03	FALSE	1.872	7	1	1	1	307	32.7	5.74	0	1	1.31	0.39	0.939281	135595	177639	24.09	1.81	2	2	161044	114168	175384	179923	151954	114168	153447	110498	1	1	1	1	High	Peak Found	Peak Found	Peak Found	1
TGGT1_320050	transcript=TGGT1_320050-t26_1 | gene=TGGT1_320050 | organism=Toxoplasma_gondii_GT1 | gene_product=Ribosomal_L18_c domain-containing protein [Source:UniProtKB/TrEMBL;Acc:A0A125YYH7] | transcript_product=ribosomal protein RPL5 | location=TGGT1_chrIV:494655-497683(+) | protein_length=310 | sequence_SO=chromosome | SO=protein_coding_gene | is_pseudo=false	0	FALSE	45.687	35	9	52	9	310	35.3	9.88	79.29	9	1.307	0.39	0.945946	3.39392e+07	4.43731e+07	11.7	37.37	2	2	3.68733e+07	3.12386e+07	5.81656e+07	3.38512e+07	3.47919e+07	3.12386e+07	5.08905e+07	2.07894e+07	9	9	9	9	High	High	High	High	1	Methylthio [C62]
TGGT1_230180	transcript=TGGT1_230180-t26_1 | gene=TGGT1_230180 | organism=Toxoplasma_gondii_GT1 | gene_product=hypothetical protein | transcript_product=hypothetical protein | location=TGGT1_chrVIII:662231-666509(-) | protein_length=542 | sequence_SO=chromosome | SO=protein_coding_gene | is_pseudo=false	0.053	FALSE	1.608	2	1	1	1	542	57.3	10.14	0	1	1.307	0.39	0.945946	101964	133290	30.35	12.35	2	2	81991.4	126803	145483	122118	77363.2	126803	127287	74997.9	1	1	1	1	Peak Found	Peak Found	High	Peak Found	1
TGGT1_261070	transcript=TGGT1_261070-t26_1 | gene=TGGT1_261070 | organism=Toxoplasma_gondii_GT1 | gene_product=TPT domain-containing protein [Source:UniProtKB/TrEMBL;Acc:A0A125YNB2] | transcript_product=apicoplast triosephosphate translocator APT1 | location=TGGT1_chrVIIb:1849395-1850453(+) | protein_length=352 | sequence_SO=chromosome | SO=protein_coding_gene | is_pseudo=false	0	FALSE	6.437	9	2	3	2	352	37.9	8.59	0	2	1.306	0.38	0.946916	510735	666775	32.19	32.31	2	2	643903	405107	841341	528428	607557	405107	736109	324530	2	2	2	2	High	Peak Found	High	Peak Found	1	Methylthio [C261]
TGGT1_215470	transcript=TGGT1_215470-t26_1 | gene=TGGT1_215470 | organism=Toxoplasma_gondii_GT1 | gene_product=Ribosomal protein [Source:UniProtKB/TrEMBL;Acc:A0A125YJN6] | transcript_product=ribosomal protein RPL10A | location=TGGT1_chrX:6865357-6867300(+) | protein_length=217 | sequence_SO=chromosome | SO=protein_coding_gene | is_pseudo=false	0	FALSE	20.956	33	6	19	6	217	24.6	9.88	19.62	6	1.301	0.38	0.946916	4.13865e+06	5.38434e+06	31.27	27.91	2	2	5.18187e+06	3.30544e+06	4.40835e+06	6.57641e+06	4.88937e+06	3.30544e+06	3.85697e+06	4.03885e+06	6	6	6	6	High	High	High	High	1	Methylthio [C65; C73]
TGGT1_271888	transcript=TGGT1_271888-t26_1 | gene=TGGT1_271888 | organism=Toxoplasma_gondii_GT1 | gene_product=Putative 3-ketoacyl-CoA reductase [Source:UniProtKB/TrEMBL;Acc:A0A125YR36] | transcript_product=putative 3-ketoacyl-CoA reductase | location=TGGT1_chrVIII:4294988-4299861(-) | protein_length=342 | sequence_SO=chromosome | SO=protein_coding_gene | is_pseudo=false	0.001	FALSE	4.962	7	3	4	3	342	37.5	9.26	0	3	1.301	0.38	0.946916	598345	778191	0.29	34.26	2	2	599583	597109	996409	607763	565739	597109	871782	373253	2	2	2	2	Peak Found	High	High	High	1	Methylthio [C231; C238]
TGGT1_203290	transcript=TGGT1_203290-t26_1 | gene=TGGT1_203290 | organism=Toxoplasma_gondii_GT1 | gene_product=hypothetical protein | transcript_product=hypothetical protein | location=TGGT1_chrVIIa:2516966-2517958(-) | protein_length=330 | sequence_SO=chromosome | SO=protein_coding_gene | is_pseudo=false	0	FALSE	19.219	17	5	10	5	330	35.9	9.11	9.81	5	1.3	0.38	0.946916	843283	1.0963e+06	112.86	117.03	2	2	2.51597e+06	282645	3.5688e+06	336771	2.37395e+06	282645	3.12243e+06	206825	5	2	5	2	High	Peak Found	High	High	1
TGGT1_306680	transcript=TGGT1_306680-t26_1 | gene=TGGT1_306680 | organism=Toxoplasma_gondii_GT1 | gene_product=hypothetical protein | transcript_product=hypothetical protein | location=TGGT1_chrIX:6058395-6062401(+) | protein_length=234 | sequence_SO=chromosome | SO=protein_coding_gene | is_pseudo=false	0.001	FALSE	3.881	7	1	2	1	234	26.3	9.57	0	1	1.299	0.38	0.946916	103660	134641	NA	NA	1	1	103660	NA	134641	NA	97809.2	NA	117801	NA	1	NA	1	NA	High	Not Found	High	Not Found	1
TGGT1_291930	transcript=TGGT1_291930-t26_1 | gene=TGGT1_291930 | organism=Toxoplasma_gondii_GT1 | gene_product=RNA recognition motif-containing protein [Source:UniProtKB/TrEMBL;Acc:S7W432] | transcript_product=RNA recognition motif-containing protein | location=TGGT1_chrIX:4212023-4217780(+) | protein_length=705 | sequence_SO=chromosome | SO=protein_coding_gene | is_pseudo=false	0	FALSE	7.731	3	2	2	2	705	73.1	5.43	0	2	1.299	0.38	0.946916	395639	513881	55.56	41.25	2	2	599255	261208	380525	693971	565429	261208	332930	426197	2	2	2	2	Peak Found	Peak Found	Peak Found	High	1	Methylthio [C468]
TGGT1_256970	transcript=TGGT1_256970-t26_1 | gene=TGGT1_256970 | organism=Toxoplasma_gondii_GT1 | gene_product=Putative vacuolar ATP synthase subunit A [Source:UniProtKB/TrEMBL;Acc:S7WF08] | transcript_product=putative vacuolar ATP synthase subunit A | location=TGGT1_chrVIIb:4248002-4257516(-) | protein_length=616 | sequence_SO=chromosome | SO=protein_coding_gene | is_pseudo=false	0.001	FALSE	5.184	4	2	2	2	616	68.1	5.48	0	2	1.296	0.37	0.951681	277246	359417	32.95	2.35	2	2	351507	218673	353493	365441	331665	218673	309279	224432	2	2	2	2	High	Peak Found	Peak Found	High	1
TGGT1_209600	transcript=TGGT1_209600-t26_1 | gene=TGGT1_209600 | organism=Toxoplasma_gondii_GT1 | gene_product=hypothetical protein | transcript_product=hypothetical protein | location=TGGT1_chrIb:1372263-1374087(-) | protein_length=451 | sequence_SO=chromosome | SO=protein_coding_gene | is_pseudo=false	0	FALSE	25.768	20	9	25	9	451	50.2	5.3	24.35	9	1.296	0.37	0.951681	5.07311e+06	6.57423e+06	42.03	52.32	2	2	6.89226e+06	3.73411e+06	9.69387e+06	4.45854e+06	6.50322e+06	3.73411e+06	8.48139e+06	2.73818e+06	9	9	9	9	High	High	High	High	1
TGGT1_228470	transcript=TGGT1_228470-t26_1 | gene=TGGT1_228470 | organism=Toxoplasma_gondii_GT1 | gene_product=Ribosomal protein L15 [Source:UniProtKB/TrEMBL;Acc:A0A125YX54] | transcript_product=ribosomal protein RPL15 | location=TGGT1_chrX:205832-208062(+) | protein_length=205 | sequence_SO=chromosome | SO=protein_coding_gene | is_pseudo=false	0	FALSE	22.091	21	4	24	4	205	24.3	11.18	44.4	4	1.292	0.37	0.953483	1.59699e+07	2.06389e+07	1.28	62.17	2	2	1.61149e+07	1.58261e+07	3.3081e+07	1.28763e+07	1.52053e+07	1.58261e+07	28943364	7.9079e+06	4	4	4	4	High	High	High	High	1
TGGT1_313400	transcript=TGGT1_313400-t26_1 | gene=TGGT1_313400 | organism=Toxoplasma_gondii_GT1 | gene_product=J domain-containing protein [Source:UniProtKB/TrEMBL;Acc:S7W1G5] | transcript_product=DnaJ domain-containing protein | location=TGGT1_chrXI:3303512-3308107(-) | protein_length=293 | sequence_SO=chromosome | SO=protein_coding_gene | is_pseudo=false	0	FALSE	20.942	23	5	15	5	293	31.9	9.2	14.59	5	1.292	0.37	0.953483	2.57042e+06	3.32168e+06	58.77	40.31	2	2	4.00028e+06	1.65165e+06	4.45321e+06	2.47766e+06	3774475	1.65165e+06	3.89622e+06	1.52164e+06	5	4	5	5	High	High	High	High	1	Methylthio [C10]
TGGT1_243330	transcript=TGGT1_243330-t26_1 | gene=TGGT1_243330 | organism=Toxoplasma_gondii_GT1 | gene_product=hypothetical protein | transcript_product=hypothetical protein | location=TGGT1_chrVI:2466438-2475815(+) | protein_length=2391 | sequence_SO=chromosome | SO=protein_coding_gene | is_pseudo=false	0.001	FALSE	3.319	1	2	2	2	2391	262.7	8.63	0	2	1.292	0.37	0.953483	1.79038e+06	2.31266e+06	66.74	65.35	2	2	2.98915e+06	1.07236e+06	3.81298e+06	1.40268e+06	2.82042e+06	1.07236e+06	3.33607e+06	861444	2	2	2	2	Peak Found	High	High	Peak Found	1	Methylthio [C1858]
TGGT1_312270	transcript=TGGT1_312270-t26_1 | gene=TGGT1_312270 | organism=Toxoplasma_gondii_GT1 | gene_product=Rhoptry protein ROP13 [Source:UniProtKB/TrEMBL;Acc:A0A125YQ57] | transcript_product=rhoptry protein ROP13 | location=TGGT1_chrXI:2519556-2520758(-) | protein_length=400 | sequence_SO=chromosome | SO=protein_coding_gene | is_pseudo=false	0	FALSE	10.598	12	2	7	2	400	44.7	9.22	3.02	2	1.29	0.37	0.955124	607858	784237	47.12	28.76	2	2	859503	429889	963889	638070	810987	429889	843329	391865	2	2	2	2	High	High	High	High	1
TGGT1_219310	transcript=TGGT1_219310-t26_1 | gene=TGGT1_219310 | organism=Toxoplasma_gondii_GT1 | gene_product=DnaK family protein [Source:UniProtKB/TrEMBL;Acc:S7V1R0] | transcript_product=DnaK family protein | location=TGGT1_chrXII:915528-922343(+) | protein_length=818 | sequence_SO=chromosome | SO=protein_coding_gene | is_pseudo=false	0.001	FALSE	3.207	2	1	3	1	818	90.1	5.35	0	1	1.286	0.36	0.956982	155294	199752	30.77	29.98	2	2	193725	124487	161069	247725	182790	124487	140923	152138	1	1	1	1	High	Peak Found	High	High	1
TGGT1_284560	transcript=TGGT1_284560-t26_1 | gene=TGGT1_284560 | organism=Toxoplasma_gondii_GT1 | gene_product=Ribosomal protein RPL9 [Source:UniProtKB/TrEMBL;Acc:A0A125YRM1] | transcript_product=ribosomal protein RPL9 | location=TGGT1_chrV:2561959-2564374(+) | protein_length=190 | sequence_SO=chromosome | SO=protein_coding_gene | is_pseudo=false	0	FALSE	20.752	26	4	23	4	190	21.4	9.64	36.98	4	1.285	0.36	0.956982	1.18796e+07	1.52681e+07	19.83	45.64	2	2	1.36801e+07	1.03161e+07	2.13366e+07	1.09257e+07	1.29079e+07	1.03161e+07	1.86679e+07	6.7099e+06	4	4	4	4	High	High	High	High	1
TGGT1_320220	transcript=TGGT1_320220-t26_1 | gene=TGGT1_320220 | organism=Toxoplasma_gondii_GT1 | gene_product=Rieske domain-containing protein [Source:UniProtKB/TrEMBL;Acc:S7UK06] | transcript_product=putative ubiquinol cytochrome c oxidoreductase | location=TGGT1_chrIV:370998-374481(-) | protein_length=487 | sequence_SO=chromosome | SO=protein_coding_gene | is_pseudo=false	0	FALSE	6.407	9	2	4	2	487	54.8	9.23	0	2	1.282	0.36	0.956982	336283	431121	62.55	11.56	2	2	540806	209108	397217	467919	510279	209108	347535	287369	2	2	2	2	High	High	High	Peak Found	1
TGGT1_239010	transcript=TGGT1_239010-t26_1 | gene=TGGT1_239010 | organism=Toxoplasma_gondii_GT1 | gene_product=hypothetical protein | transcript_product=hypothetical protein | location=TGGT1_chrVI:386043-388100(-) | protein_length=685 | sequence_SO=chromosome | SO=protein_coding_gene | is_pseudo=false	0	FALSE	9.247	10	2	5	2	685	70.7	9.58	9.12	2	1.279	0.35	0.956982	553823	708278	57.89	41.85	2	2	358544	855459	960921	522060	338306	855459	840732	320619	1	2	2	2	High	High	High	High	1	Phospho [S112; S199; S304]
TGGT1_232300	transcript=TGGT1_232300-t26_1 | gene=TGGT1_232300 | organism=Toxoplasma_gondii_GT1 | gene_product=KH type-2 domain-containing protein [Source:UniProtKB/TrEMBL;Acc:S7V3B5] | transcript_product=ribosomal protein RPS3 | location=TGGT1_chrVIII:1993673-1994649(-) | protein_length=255 | sequence_SO=chromosome | SO=protein_coding_gene | is_pseudo=false	0	FALSE	44.42	44	10	62	10	255	28.6	9.45	81.82	10	1.278	0.35	0.956982	3.73605e+07	4.77623e+07	16.8	29.77	2	2	4.20977e+07	3.31564e+07	5.91421e+07	3.85721e+07	3.97214e+07	3.31564e+07	5.17448e+07	2.36887e+07	9	10	9	10	High	High	High	High	1	Methylthio [C119; C141; C156]
TGGT1_250770	transcript=TGGT1_250770-t26_1 | gene=TGGT1_250770 | organism=Toxoplasma_gondii_GT1 | gene_product=Putative eukaryotic initiation factor-4A [Source:UniProtKB/TrEMBL;Acc:A0A125YLG0] | transcript_product=putative eukaryotic initiation factor-4A | location=TGGT1_chrXII:5123731-5125767(-) | protein_length=412 | sequence_SO=chromosome | SO=protein_coding_gene | is_pseudo=false	0	FALSE	40.707	33	11	60	11	412	46.6	5.67	76.04	11	1.275	0.35	0.956982	4.00302e+07	5.10566e+07	14.16	35.39	2	2	4.42592e+07	3.62054e+07	6.59317e+07	3.95375e+07	4.17609e+07	3.62054e+07	5.76852e+07	2.42816e+07	11	11	11	11	High	High	High	High	1
TGGT1_289050	transcript=TGGT1_289050-t26_1 | gene=TGGT1_289050 | organism=Toxoplasma_gondii_GT1 | gene_product=Protein kinase domain-containing protein [Source:UniProtKB/TrEMBL;Acc:S7UPL7] | transcript_product=putative FIKK kinase | location=TGGT1_chrIX:2746213-2758051(-) | protein_length=2887 | sequence_SO=chromosome | SO=protein_coding_gene | is_pseudo=false	0	FALSE	7.365	2	3	5	3	2887	301.1	8.98	0	3	1.274	0.35	0.956982	337628	430019	40.28	28.55	2	2	452530	251901	527681	350431	426986	251901	461681	215214	3	2	3	2	High	High	High	High	1
TGGT1_223050	transcript=TGGT1_223050-t26_1 | gene=TGGT1_223050 | organism=Toxoplasma_gondii_GT1 | gene_product=Ribosomal_S10 domain-containing protein [Source:UniProtKB/TrEMBL;Acc:S7UL41] | transcript_product=ribosomal protein RPS20 | location=TGGT1_chrII:1366681-1368519(+) | protein_length=233 | sequence_SO=chromosome | SO=protein_coding_gene | is_pseudo=false	0	FALSE	19.022	24	6	23	6	233	25.8	9.52	36.13	6	1.272	0.35	0.956982	2.20049e+07	2.79972e+07	14.44	31.67	2	2	2.43795e+07	19861624	3.5159e+07	2.22942e+07	2.30034e+07	19861624	3.07614e+07	1.36918e+07	6	6	6	6	High	High	High	High	1	Methylthio [C150; C184]
TGGT1_248600	transcript=TGGT1_248600-t26_1 | gene=TGGT1_248600 | organism=Toxoplasma_gondii_GT1 | gene_product=Aspartate aminotransferase [Source:UniProtKB/TrEMBL;Acc:S7V115] | transcript_product=aspartate aminotransferase | location=TGGT1_chrXII:3950218-3958059(-) | protein_length=597 | sequence_SO=chromosome | SO=protein_coding_gene | is_pseudo=false	0.03	FALSE	1.832	1	1	1	1	597	66.1	9.06	0	1	1.272	0.35	0.956982	264054	335920	49.69	3.89	2	2	381136	182939	326805	345290	359622	182939	285929	212057	1	1	1	1	Peak Found	Peak Found	Peak Found	High	1
TGGT1_315780	transcript=TGGT1_315780-t26_1 | gene=TGGT1_315780 | organism=Toxoplasma_gondii_GT1 | gene_product=Putative myosin regulatory light chain [Source:UniProtKB/TrEMBL;Acc:A0A125YT28] | transcript_product=putative myosin regulatory light chain | location=TGGT1_chrXI:4923626-4926382(+) | protein_length=206 | sequence_SO=chromosome | SO=protein_coding_gene | is_pseudo=false	0	FALSE	36.242	48	9	32	9	206	23.1	7.49	31.99	9	1.271	0.35	0.956982	7.95031e+06	1.0105e+07	23.75	28.42	2	2	6.71066e+06	9.41896e+06	1.23886e+07	8.24234e+06	6.33187e+06	9.41896e+06	1.0839e+07	5.06196e+06	8	8	8	8	High	High	High	High	1
TGGT1_267060	transcript=TGGT1_267060-t26_1 | gene=TGGT1_267060 | organism=Toxoplasma_gondii_GT1 | gene_product=Ribosomal_L14e domain-containing protein [Source:UniProtKB/TrEMBL;Acc:S7VPP6] | transcript_product=ribosomal protein RPL14 | location=TGGT1_chrIX:634719-636622(+) | protein_length=157 | sequence_SO=chromosome | SO=protein_coding_gene | is_pseudo=false	0	FALSE	10.862	18	3	14	3	157	17.9	10.77	17.31	3	1.271	0.35	0.956982	5.65061e+06	7.17977e+06	61.92	38.53	2	2	9.0368e+06	3.53326e+06	9.49478e+06	5.42921e+06	8.52671e+06	3.53326e+06	8.30721e+06	3.3343e+06	3	3	3	3	High	High	High	High	1	Methylthio [C14]
TGGT1_240650	transcript=TGGT1_240650-t26_1 | gene=TGGT1_240650 | organism=Toxoplasma_gondii_GT1 | gene_product=WD_REPEATS_REGION domain-containing protein [Source:UniProtKB/TrEMBL;Acc:A0A125YGM0] | transcript_product=putative coatomer protein complex, subunit alpha | location=TGGT1_chrVI:1326973-1343296(-) | protein_length=1300 | sequence_SO=chromosome | SO=protein_coding_gene | is_pseudo=false	0	FALSE	16.652	7	6	10	6	1300	142.9	7.25	0	6	1.269	0.34	0.956982	827903	1.0507e+06	39.42	24.26	2	2	1.10235e+06	621781	1.24944e+06	883564	1.04013e+06	621781	1.09317e+06	542634	6	5	6	6	High	High	High	Peak Found	1
TGGT1_212300	transcript=TGGT1_212300-t26_1 | gene=TGGT1_212300 | organism=Toxoplasma_gondii_GT1 | gene_product=hypothetical protein | transcript_product=hypothetical protein | location=TGGT1_chrX:3837742-3842895(+) | protein_length=683 | sequence_SO=chromosome | SO=protein_coding_gene | is_pseudo=false	0.001	FALSE	4.159	4	2	2	2	683	75.6	6.51	0	2	1.269	0.34	0.956982	207083	262727	46.43	66.15	2	2	291216	147255	436289	158210	274778	147255	381719	97163.6	2	2	2	2	Peak Found	Peak Found	High	Peak Found	1
TGGT1_270050	transcript=TGGT1_270050-t26_1 | gene=TGGT1_270050 | organism=Toxoplasma_gondii_GT1 | gene_product=hypothetical protein | transcript_product=hypothetical protein | location=TGGT1_chrVIII:5442081-5443472(-) | protein_length=463 | sequence_SO=chromosome | SO=protein_coding_gene | is_pseudo=false	0	FALSE	8.703	7	3	6	3	463	47.4	8.76	5.31	3	1.267	0.34	0.956982	293126	371360	13.35	10.17	2	2	266649	322231	345552	399095	251598	322231	302331	245101	1	1	1	2	High	High	High	High	1
TGGT1_278660	transcript=TGGT1_278660-t26_1 | gene=TGGT1_278660 | organism=Toxoplasma_gondii_GT1 | gene_product=Cation_ATPase_N domain-containing protein [Source:UniProtKB/TrEMBL;Acc:S7UZZ0] | transcript_product=putative P-type ATPase4 | location=TGGT1_chrXII:5863040-5875230(+) | protein_length=1338 | sequence_SO=chromosome | SO=protein_coding_gene | is_pseudo=false	0.023	FALSE	1.947	1	1	1	1	1338	144.6	6.18	0	1	1.267	0.34	0.956982	63476.2	80411.9	46.94	3.67	2	2	89624.6	44956.7	82526.7	78351.4	84565.6	44956.7	72204.5	48118.8	1	1	1	1	High	Peak Found	Peak Found	Peak Found	1
TGGT1_220240	transcript=TGGT1_220240-t26_1 | gene=TGGT1_220240 | organism=Toxoplasma_gondii_GT1 | gene_product=hypothetical protein | transcript_product=hypothetical protein | location=TGGT1_chrV:140178-141758(-) | protein_length=526 | sequence_SO=chromosome | SO=protein_coding_gene | is_pseudo=false	0	FALSE	7.003	4	2	6	2	526	54.1	9.86	13.86	2	1.266	0.34	0.956982	1.63535e+06	2.07098e+06	46.13	79.37	2	2	2.29427e+06	1.16568e+06	3.90636e+06	1.09794e+06	2.16477e+06	1.16568e+06	3.41777e+06	674292	2	2	2	2	High	High	High	Peak Found	1
TGGT1_290700	transcript=TGGT1_290700-t26_1 | gene=TGGT1_290700 | organism=Toxoplasma_gondii_GT1 | gene_product=hypothetical protein | transcript_product=hypothetical protein | location=TGGT1_chrIX:3657972-3658910(+) | protein_length=312 | sequence_SO=chromosome | SO=protein_coding_gene | is_pseudo=false	0	FALSE	24.005	25	4	10	4	312	34.5	9.67	22.43	4	1.264	0.34	0.956982	2.94295e+06	3.72033e+06	55.26	68.28	2	2	4.44647e+06	1.94783e+06	6.29942e+06	2.19717e+06	4.19548e+06	1.94783e+06	5.51151e+06	1.34937e+06	4	3	4	4	High	High	High	High	1
TGGT1_312420	transcript=TGGT1_312420-t26_1 | gene=TGGT1_312420 | organism=Toxoplasma_gondii_GT1 | gene_product=hypothetical protein | transcript_product=hypothetical protein | location=TGGT1_chrXI:2633576-2638766(-) | protein_length=1086 | sequence_SO=chromosome | SO=protein_coding_gene | is_pseudo=false	0.029	FALSE	1.891	1	1	1	1	1086	117.8	8.18	0	1	1.263	0.34	0.956982	82566.9	104298	36.15	49.48	2	2	107237	63572.3	150285	72382.9	101184	63572.3	131488	44453.3	1	1	1	1	High	Peak Found	Peak Found	Peak Found	1
TGGT1_225800	transcript=TGGT1_225800-t26_1 | gene=TGGT1_225800 | organism=Toxoplasma_gondii_GT1 | gene_product=ABC transporter domain-containing protein [Source:UniProtKB/TrEMBL;Acc:S7W5I7] | transcript_product=iron-sulfur assembly ATPase | location=TGGT1_chrX:1940841-1943804(-) | protein_length=518 | sequence_SO=chromosome | SO=protein_coding_gene | is_pseudo=false	0.062	FALSE	1.523	2	1	1	1	518	57	5.63	0	1	1.263	0.34	0.956982	1.42671e+06	1.80162e+06	34.91	NA	2	1	1.83569e+06	1.10884e+06	1.80162e+06	NA	1732075	1.10884e+06	1.57628e+06	NA	1	1	1	NA	Peak Found	Peak Found	High	Not Found	1
TGGT1_262640	transcript=TGGT1_262640-t26_1 | gene=TGGT1_262640 | organism=Toxoplasma_gondii_GT1 | gene_product=Cg8 family protein [Source:UniProtKB/TrEMBL;Acc:A0A125YRH5] | transcript_product=Cg8 family protein | location=TGGT1_chrVIIb:1085583-1087442(+) | protein_length=204 | sequence_SO=chromosome | SO=protein_coding_gene | is_pseudo=false	0.018	FALSE	2.063	7	1	1	1	204	23.7	9.48	0	1	1.262	0.34	0.956982	102349	129213	4.17	39.03	2	2	99377.3	105409	97329.1	171542	93767.8	105409	85155.5	105351	1	1	1	1	Peak Found	Peak Found	Peak Found	High	1
TGGT1_273460	transcript=TGGT1_273460-t26_1 | gene=TGGT1_273460 | organism=Toxoplasma_gondii_GT1 | gene_product=Eukaryotic translation initiation factor 3 subunit L [Source:UniProtKB/TrEMBL;Acc:A0A125YVE2] | transcript_product=eukaryotic translation initiation factor 3 subunit 6 interacting protein | location=TGGT1_chrVIII:3489847-3495730(-) | protein_length=639 | sequence_SO=chromosome | SO=protein_coding_gen…	0.001	FALSE	5.489	5	3	3	3	639	75	5.71	0	3	1.261	0.33	0.956982	431171	543733	94.07	89.41	2	2	193334	961591	258100	1.14547e+06	182421	961591	225817	703481	1	3	1	3	Peak Found	Peak Found	High	High	1
TGGT1_261570	transcript=TGGT1_261570-t26_1 | gene=TGGT1_261570 | organism=Toxoplasma_gondii_GT1 | gene_product=60S ribosomal protein L7a [Source:UniProtKB/TrEMBL;Acc:A0A125YW74] | transcript_product=ribosomal protein RPL7A | location=TGGT1_chrVIIb:1628077-1630958(+) | protein_length=276 | sequence_SO=chromosome | SO=protein_coding_gene | is_pseudo=false	0	FALSE	50.21	36	12	69	12	276	31	10.45	101.98	12	1.261	0.33	0.956982	6.85718e+07	8.64584e+07	11.5	43.11	2	2	7.43953e+07	6.32041e+07	1.18447e+08	6.31086e+07	7.0196e+07	6.32041e+07	1.03632e+08	3.87576e+07	12	13	12	13	High	High	High	High	1	Methylthio [C189; C206; C226]
TGGT1_306650	transcript=TGGT1_306650-t26_1 | gene=TGGT1_306650 | organism=Toxoplasma_gondii_GT1 | gene_product=hypothetical protein | transcript_product=hypothetical protein | location=TGGT1_chrIX:6020484-6022587(-) | protein_length=286 | sequence_SO=chromosome | SO=protein_coding_gene | is_pseudo=false	0.04	FALSE	1.724	5	1	1	1	286	31.4	7.25	0	1	1.26	0.33	0.956982	147343	185638	51.55	23.02	2	2	215912	100550	157516	218781	203725	100550	137814	134362	1	1	1	1	High	Peak Found	Peak Found	Peak Found	1
TGGT1_212290	transcript=TGGT1_212290-t26_1 | gene=TGGT1_212290 | organism=Toxoplasma_gondii_GT1 | gene_product=Ribosomal protein RPS19 [Source:UniProtKB/TrEMBL;Acc:S7UVX4] | transcript_product=ribosomal protein RPS19 | location=TGGT1_chrX:3845925-3847625(-) | protein_length=313 | sequence_SO=chromosome | SO=protein_coding_gene | is_pseudo=false	0.004	FALSE	2.731	4	1	2	1	313	34.9	8.68	0	1	1.259	0.33	0.956982	279807	352323	43.41	67.87	2	2	384243	203756	208869	594303	362553	203756	182745	364986	1	1	1	1	High	Peak Found	Peak Found	High	1
TGGT1_217820	transcript=TGGT1_217820-t26_1 | gene=TGGT1_217820 | organism=Toxoplasma_gondii_GT1 | gene_product=Eukaryotic translation initiation factor 3 subunit M [Source:UniProtKB/TrEMBL;Acc:A0A125YQU9] | transcript_product=PCI domain-containing protein | location=TGGT1_chrXII:2088870-2094251(+) | protein_length=463 | sequence_SO=chromosome | SO=protein_coding_gene | is_pseudo=false	0.002	FALSE	2.914	2	1	3	1	463	51.7	5.94	1.65	1	1.257	0.33	0.956982	215890	271459	53.45	9.72	2	2	321311	145058	290797	253407	303174	145058	254425	155628	1	1	1	1	High	Peak Found	High	High	1
TGGT1_264040	transcript=TGGT1_264040-t26_1 | gene=TGGT1_264040 | organism=Toxoplasma_gondii_GT1 | gene_product=hypothetical protein | transcript_product=hypothetical protein | location=TGGT1_chrVIIb:194329-194991(-) | protein_length=220 | sequence_SO=chromosome | SO=protein_coding_gene | is_pseudo=false	0.009	FALSE	2.266	5	1	2	1	220	24.5	9.69	0	1	1.255	0.33	0.956982	111890	140398	65.3	49.68	2	2	184386	67897.9	97275.4	202637	173978	67897.9	85108.5	124448	1	1	1	1	High	Peak Found	Peak Found	High	1
TGGT1_230410	transcript=TGGT1_230410-t26_1 | gene=TGGT1_230410 | organism=Toxoplasma_gondii_GT1 | gene_product=Thioredoxin domain-containing protein [Source:UniProtKB/TrEMBL;Acc:S7V2Y3] | transcript_product=peroxiredoxin PRX3 | location=TGGT1_chrVIII:753559-755687(-) | protein_length=283 | sequence_SO=chromosome | SO=protein_coding_gene | is_pseudo=false	0	FALSE	7.921	12	3	9	3	283	30.4	8.78	2.36	3	1.254	0.33	0.956982	790438	991342	39.51	31.4	2	2	1.0532e+06	593231	790973	1.24247e+06	993752	593231	692041	763051	2	3	2	3	High	High	High	High	1
TGGT1_305850	transcript=TGGT1_305850-t26_1 | gene=TGGT1_305850 | organism=Toxoplasma_gondii_GT1 | gene_product=RNA recognition motif-containing protein [Source:UniProtKB/TrEMBL;Acc:A0A125YMV7] | transcript_product=RNA recognition motif-containing protein | location=TGGT1_chrIX:5399604-5403723(-) | protein_length=372 | sequence_SO=chromosome | SO=protein_coding_gene | is_pseudo=false	0	FALSE	18.706	19	7	16	7	372	39.1	9.63	18.23	7	1.253	0.33	0.956982	2.66585e+06	3.34e+06	41.23	2.06	2	2	3.59938e+06	1.97444e+06	3.29176e+06	3.38895e+06	3.39621e+06	1.97444e+06	2.88004e+06	2.08129e+06	6	5	6	6	High	High	High	High	1
TGGT1_215590	transcript=TGGT1_215590-t26_1 | gene=TGGT1_215590 | organism=Toxoplasma_gondii_GT1 | gene_product=Succinate dehydrogenase [ubiquinone] flavoprotein subunit, mitochondrial [Source:UniProtKB/TrEMBL;Acc:A0A125YLN0] | transcript_product=flavoprotein subunit of succinate dehydrogenase | location=TGGT1_chrX:6924001-6933881(-) | protein_length=669 | sequence_SO=chromosome | SO=protein_coding_gene | is_p…	0	FALSE	7.743	8	4	5	4	669	72.7	8.19	0	4	1.251	0.32	0.956982	313797	392700	82.42	14.68	2	2	611182	161112	435809	353856	576683	161112	381299	217318	3	2	3	3	High	Peak Found	High	Peak Found	1	Methylthio [C155]
TGGT1_248480	transcript=TGGT1_248480-t26_1 | gene=TGGT1_248480 | organism=Toxoplasma_gondii_GT1 | gene_product=S4 RNA-binding domain-containing protein [Source:UniProtKB/TrEMBL;Acc:A0A125YWF5] | transcript_product=ribosomal protein RPS9 | location=TGGT1_chrXII:3816916-3818776(+) | protein_length=188 | sequence_SO=chromosome | SO=protein_coding_gene | is_pseudo=false	0	FALSE	19.304	34	6	20	6	188	21.7	10.51	32.83	6	1.25	0.32	0.956982	1.77846e+07	2.22391e+07	21.16	34.39	2	2	2.06784e+07	1.52957e+07	2.85028e+07	1.73519e+07	1.95112e+07	1.52957e+07	2.49378e+07	1.06565e+07	5	6	5	5	High	High	High	High	1
TGGT1_318440	transcript=TGGT1_318440-t26_1 | gene=TGGT1_318440 | organism=Toxoplasma_gondii_GT1 | gene_product=Helicase associated domain (Ha2) protein [Source:UniProtKB/TrEMBL;Acc:S7UJM8] | transcript_product=helicase associated domain (ha2) protein | location=TGGT1_chrIV:1264045-1277404(-) | protein_length=2234 | sequence_SO=chromosome | SO=protein_coding_gene | is_pseudo=false	0	FALSE	61.342	13	19	34	19	2234	236.8	8.97	26.04	19	1.25	0.32	0.956982	8.4608e+06	1.05788e+07	15.35	8.06	2	2	7.58749e+06	9.43464e+06	9.99236e+06	1.11997e+07	7.1592e+06	9.43464e+06	8.74255e+06	6.87821e+06	17	15	17	14	High	High	High	High	1	Methylthio [C1279]
TGGT1_207920	transcript=TGGT1_207920-t26_1 | gene=TGGT1_207920 | organism=Toxoplasma_gondii_GT1 | gene_product=hypothetical protein | transcript_product=hypothetical protein | location=TGGT1_chrIb:453863-457810(+) | protein_length=726 | sequence_SO=chromosome | SO=protein_coding_gene | is_pseudo=false	0.062	FALSE	1.52	2	1	1	1	726	80.4	8.4	0	1	1.25	0.32	0.956982	167885	209836	70.78	12.88	2	2	290981	96863.8	191516	229909	274556	96863.8	167562	141196	1	1	1	1	Peak Found	Peak Found	Peak Found	High	1
TGGT1_311430	transcript=TGGT1_311430-t26_1 | gene=TGGT1_311430 | organism=Toxoplasma_gondii_GT1 | gene_product=Fibrillarin [Source:UniProtKB/TrEMBL;Acc:S7UTZ7] | transcript_product=fibrillarin | location=TGGT1_chrXI:2031325-2032910(-) | protein_length=303 | sequence_SO=chromosome | SO=protein_coding_gene | is_pseudo=false	0	FALSE	37.335	33	10	33	10	303	31.9	10.29	43.76	10	1.25	0.32	0.956982	1.17339e+07	1.46631e+07	15.13	43.29	2	2	1.30644e+07	1.0539e+07	2.01166e+07	1.06881e+07	1.23269e+07	1.0539e+07	1.76005e+07	6.56401e+06	10	10	10	10	High	High	High	High	1
TGGT1_278990	transcript=TGGT1_278990-t26_1 | gene=TGGT1_278990 | organism=Toxoplasma_gondii_GT1 | gene_product=Putative phosphate carrier [Source:UniProtKB/TrEMBL;Acc:A0A125YTR2] | transcript_product=putative phosphate carrier | location=TGGT1_chrXII:5622211-5625652(-) | protein_length=479 | sequence_SO=chromosome | SO=protein_coding_gene | is_pseudo=false	0	FALSE	20.236	18	7	21	7	479	53.1	9.41	13.02	7	1.249	0.32	0.956982	2.65119e+06	3.31093e+06	65.03	10.79	2	2	4.35842e+06	1.6127e+06	3.57401e+06	3.06721e+06	4.1124e+06	1.6127e+06	3.12699e+06	1.8837e+06	7	7	7	7	High	High	High	High	1
TGGT1_205470	transcript=TGGT1_205470-t26_1 | gene=TGGT1_205470 | organism=Toxoplasma_gondii_GT1 | gene_product=Tr-type G domain-containing protein [Source:UniProtKB/TrEMBL;Acc:A0A125YJ59] | transcript_product=putative translation elongation factor 2 family protein | location=TGGT1_chrVIIa:1297616-1301283(+) | protein_length=832 | sequence_SO=chromosome | SO=protein_coding_gene | is_pseudo=false	0	FALSE	49.159	21	14	39	14	832	93	6.33	41.91	14	1.246	0.32	0.956982	1.32032e+07	1.64556e+07	43.19	17.61	2	2	1.81004e+07	9.63103e+06	1.45197e+07	1.86495e+07	1.70787e+07	9.63103e+06	1.27036e+07	1.14535e+07	13	14	13	14	High	High	High	High	1	Methylthio [C667; C699]
TGGT1_215460	transcript=TGGT1_215460-t26_1 | gene=TGGT1_215460 | organism=Toxoplasma_gondii_GT1 | gene_product=40S ribosomal protein S24 [Source:UniProtKB/TrEMBL;Acc:S7UQS1] | transcript_product=ribosomal protein RPS24 | location=TGGT1_chrX:6863478-6865141(-) | protein_length=267 | sequence_SO=chromosome | SO=protein_coding_gene | is_pseudo=false	0	FALSE	22.651	18	4	21	4	267	30.4	11.08	49.1	4	1.245	0.32	0.956982	3.83108e+07	4.76879e+07	13.79	36.11	2	2	3.47397e+07	4.22491e+07	6.19144e+07	3.67303e+07	3.27787e+07	4.22491e+07	5.41703e+07	2.25576e+07	4	4	4	4	High	High	High	High	1
TGGT1_277270	transcript=TGGT1_277270-t26_1 | gene=TGGT1_277270 | organism=Toxoplasma_gondii_GT1 | gene_product=NTPase II [Source:UniProtKB/TrEMBL;Acc:S7UGK0] | transcript_product=NTPase II | location=AAQM03000418:1-4939(+) | protein_length=862 | sequence_SO=contig | SO=protein_coding_gene | is_pseudo=false	0	FALSE	66.127	29	17	64	4	862	95.7	6.74	52.05	17	1.244	0.32	0.956982	3.71752e+06	4.62533e+06	62.81	43.47	2	2	5.99174e+06	2.30649e+06	6.3548e+06	3.36653e+06	5.65353e+06	2.30649e+06	5.55996e+06	2.06753e+06	3	3	3	3	High	High	High	High	1	Methylthio [C122; C229; C277; C297; C390; C422; C687; C794; C808; C842]
TGGT1_248120	transcript=TGGT1_248120-t26_1 | gene=TGGT1_248120 | organism=Toxoplasma_gondii_GT1 | gene_product=hypothetical protein | transcript_product=hypothetical protein | location=TGGT1_chrXII:3601439-3608088(-) | protein_length=962 | sequence_SO=chromosome | SO=protein_coding_gene | is_pseudo=false	0.001	FALSE	4.553	2	1	1	1	962	100.7	7.96	0	1	1.241	0.31	0.956982	63779.1	79143.3	14.9	105.45	2	2	70894.1	57378.2	207336	30210.1	66892.4	57378.2	181403	18553.3	1	1	1	1	Peak Found	Peak Found	High	Peak Found	1
TGGT1_238250	transcript=TGGT1_238250-t26_1 | gene=TGGT1_238250 | organism=Toxoplasma_gondii_GT1 | gene_product=60S ribosomal protein L36 [Source:UniProtKB/TrEMBL;Acc:A0A125YHS1] | transcript_product=ribosomal protein RPL36 | location=TGGT1_chrVI:154936-156110(+) | protein_length=101 | sequence_SO=chromosome | SO=protein_coding_gene | is_pseudo=false	0	FALSE	9.275	12	2	4	2	101	11.4	12.06	6.26	2	1.24	0.31	0.956982	1.46036e+06	1.81052e+06	45.64	22.29	2	2	2.04086e+06	1.04497e+06	2.12248e+06	1.54441e+06	1.92566e+06	1.04497e+06	1.857e+06	948487	2	2	2	2	High	Peak Found	High	Peak Found	1
TGGT1_320760	transcript=TGGT1_320760-t26_1 | gene=TGGT1_320760 | organism=Toxoplasma_gondii_GT1 | gene_product=hypothetical protein | transcript_product=hypothetical protein | location=TGGT1_chrIV:35039-39691(-) | protein_length=357 | sequence_SO=chromosome | SO=protein_coding_gene | is_pseudo=false	0.038	FALSE	1.751	3	1	1	1	357	39.4	9.54	0	1	1.236	0.31	0.956982	925746	1.14448e+06	NA	NA	1	1	NA	925746	NA	1.14448e+06	NA	925746	NA	702873	NA	1	NA	1	Not Found	Peak Found	Not Found	High	1
TGGT1_275750	transcript=TGGT1_275750-t26_1 | gene=TGGT1_275750 | organism=Toxoplasma_gondii_GT1 | gene_product=Small nuclear ribonucleoprotein E [Source:UniProtKB/TrEMBL;Acc:A0A125YK47] | transcript_product=putative small nuclear ribonucleoprotein E | location=TGGT1_chrIII:236922-238994(-) | protein_length=91 | sequence_SO=chromosome | SO=protein_coding_gene | is_pseudo=false	0.001	FALSE	3.619	12	1	4	1	91	10.8	9.7	3.77	1	1.236	0.31	0.956982	333295	411872	28.19	10.8	2	2	407927	272317	444610	381544	384901	272317	389000	234322	1	1	1	1	High	High	High	High	1
TGGT1_313450	transcript=TGGT1_313450-t26_1 | gene=TGGT1_313450 | organism=Toxoplasma_gondii_GT1 | gene_product=AP complex subunit sigma [Source:UniProtKB/TrEMBL;Acc:A0A125YFX3] | transcript_product=putative AP-2 complex subunit sigma-1 | location=TGGT1_chrXI:3368375-3368806(-) | protein_length=143 | sequence_SO=chromosome | SO=protein_coding_gene | is_pseudo=false	0.061	FALSE	1.529	6	1	1	1	143	16.8	7.97	0	1	1.235	0.31	0.956982	98350.6	121510	9.11	25.98	2	2	104903	92207.7	146323	100905	98981.2	92207.7	128021	61969.7	1	1	1	1	Peak Found	Peak Found	High	Peak Found	1
TGGT1_288360	transcript=TGGT1_288360-t26_1 | gene=TGGT1_288360 | organism=Toxoplasma_gondii_GT1 | gene_product=Tryptophanyl-tRNA synthetase (TrpRS2) [Source:UniProtKB/TrEMBL;Acc:A0A125YPX8] | transcript_product=tryptophanyl-tRNA synthetase (TrpRS2) | location=TGGT1_chrIX:2284649-2289081(+) | protein_length=689 | sequence_SO=chromosome | SO=protein_coding_gene | is_pseudo=false	0	FALSE	72.56	34	18	59	18	689	77	7.3	66.54	18	1.235	0.3	0.956982	1.26935e+07	1.56792e+07	35.6	31.52	2	2	1.64171e+07	9.81442e+06	1.2499e+07	1.96685e+07	1.54904e+07	9.81442e+06	1.09357e+07	1.20792e+07	19	19	18	19	High	High	High	High	1	Methylthio [C156; C231; C307; C444; C521; C683]
TGGT1_223040	transcript=TGGT1_223040-t26_1 | gene=TGGT1_223040 | organism=Toxoplasma_gondii_GT1 | gene_product=hypothetical protein | transcript_product=hypothetical protein | location=TGGT1_chrII:1361784-1363339(-) | protein_length=239 | sequence_SO=chromosome | SO=protein_coding_gene | is_pseudo=false	0.001	FALSE	3.457	4	1	2	1	239	27.4	7.25	0	1	1.235	0.3	0.956982	189094	233536	59.14	21.54	2	2	295218	121119	200297	272290	278554	121119	175245	167224	1	1	1	1	High	Peak Found	Peak Found	High	1
TGGT1_294670	transcript=TGGT1_294670-t26_1 | gene=TGGT1_294670 | organism=Toxoplasma_gondii_GT1 | gene_product=Eukaryotic translation initiation factor 3 subunit G [Source:UniProtKB/TrEMBL;Acc:A0A125YLN2] | transcript_product=translation initiation factor 3 subunit | location=TGGT1_chrIa:1039815-1044413(-) | protein_length=277 | sequence_SO=chromosome | SO=protein_coding_gene | is_pseudo=false	0	FALSE	9.828	18	4	9	4	277	31.8	6.46	6.8	4	1.234	0.3	0.956982	2.70094e+06	3.33203e+06	28.02	4.36	2	2	3.30143e+06	2.20967e+06	3.4364e+06	3.23082e+06	3.11508e+06	2.20967e+06	3.00658e+06	1.98418e+06	3	3	3	3	High	High	High	High	1
TGGT1_262670	transcript=TGGT1_262670-t26_1 | gene=TGGT1_262670 | organism=Toxoplasma_gondii_GT1 | gene_product=60S ribosomal protein L18a [Source:UniProtKB/TrEMBL;Acc:A0A125YSP4] | transcript_product=ribosomal protein RPL18A | location=TGGT1_chrVIIb:1067095-1069205(+) | protein_length=183 | sequence_SO=chromosome | SO=protein_coding_gene | is_pseudo=false	0	FALSE	39.671	51	10	58	10	183	21.3	10.65	108.23	10	1.234	0.3	0.956982	3.01654e+07	3.72116e+07	36.44	51.84	2	2	3.92627e+07	2.3176e+07	5.46581e+07	2.53339e+07	3.70464e+07	2.3176e+07	4.78216e+07	1.55586e+07	10	10	10	10	High	High	High	High	1
TGGT1_310750	transcript=TGGT1_310750-t26_1 | gene=TGGT1_310750 | organism=Toxoplasma_gondii_GT1 | gene_product=GOLD domain-containing protein [Source:UniProtKB/TrEMBL;Acc:S7W275] | transcript_product=emp24/gp25L/p24 family protein | location=TGGT1_chrXI:1533084-1537096(+) | protein_length=601 | sequence_SO=chromosome | SO=protein_coding_gene | is_pseudo=false	0	FALSE	21.978	18	6	12	6	601	64.9	5.85	3.87	6	1.233	0.3	0.956982	1.55352e+06	1.91624e+06	41.57	17.66	2	2	2.10301e+06	1.1476e+06	2.17259e+06	1.69014e+06	1.9843e+06	1.1476e+06	1.90085e+06	1.03799e+06	5	5	5	5	High	High	High	High	1
TGGT1_263700	transcript=TGGT1_263700-t26_1 | gene=TGGT1_263700 | organism=Toxoplasma_gondii_GT1 | gene_product=Ribosomal protein RPS14 [Source:UniProtKB/TrEMBL;Acc:S7W6D1] | transcript_product=ribosomal protein RPS14 | location=TGGT1_chrVIIb:359504-361231(+) | protein_length=156 | sequence_SO=chromosome | SO=protein_coding_gene | is_pseudo=false	0	FALSE	46.989	68	9	45	9	156	16.3	10.36	73	9	1.233	0.3	0.956982	7.13266e+07	8.79418e+07	12.93	17.98	2	2	7.81741e+07	6.50789e+07	9.99311e+07	7.73909e+07	7.37615e+07	6.50789e+07	8.74321e+07	4.7529e+07	7	9	8	9	High	High	High	High	1
TGGT1_227420	transcript=TGGT1_227420-t26_1 | gene=TGGT1_227420 | organism=Toxoplasma_gondii_GT1 | gene_product=4-hydroxy-3-methylbut-2-enyl diphosphate reductase [Source:UniProtKB/TrEMBL;Acc:S7WDA3] | transcript_product=4-hydroxy-3-methylbut-2-enyl diphosphate reductase | location=TGGT1_chrX:857137-861452(-) | protein_length=715 | sequence_SO=chromosome | SO=protein_coding_gene | is_pseudo=false	0.001	FALSE	3.64	3	2	3	2	715	75.4	7.88	3.38	2	1.233	0.3	0.956982	1.37717e+06	1.69788e+06	2.13	30.89	2	2	1.39804e+06	1.35661e+06	2.1199e+06	1.35986e+06	1.31913e+06	1.35661e+06	1.85475e+06	835150	1	1	1	1	Peak Found	High	Peak Found	High	1
TGGT1_266460	transcript=TGGT1_266460-t26_1 | gene=TGGT1_266460 | organism=Toxoplasma_gondii_GT1 | gene_product=Ubiquitin-like domain-containing protein [Source:UniProtKB/TrEMBL;Acc:A0A125YUS7] | transcript_product=putative small ubiquitin family modifier | location=TGGT1_chrIX:944091-944969(-) | protein_length=91 | sequence_SO=chromosome | SO=protein_coding_gene | is_pseudo=false	0.001	FALSE	4.007	19	2	4	2	91	10.3	5.97	0	2	1.232	0.3	0.956982	326323	401950	32.76	31.88	2	2	413140	257749	319558	505585	389820	257749	279589	310501	2	2	2	2	High	High	Peak Found	High	1
TGGT1_234450	transcript=TGGT1_234450-t26_1 | gene=TGGT1_234450 | organism=Toxoplasma_gondii_GT1 | gene_product=Ribosomal protein RPS15A [Source:UniProtKB/TrEMBL;Acc:S7UWC7] | transcript_product=ribosomal protein RPS15A | location=TGGT1_chrX:4292801-4294683(+) | protein_length=231 | sequence_SO=chromosome | SO=protein_coding_gene | is_pseudo=false	0	FALSE	15.066	23	6	21	6	231	26.6	9.67	31.47	6	1.232	0.3	0.956982	1.22336e+07	1.50668e+07	48.2	7.73	2	2	1.74478e+07	8.57769e+06	1.59138e+07	1.42648e+07	1.64629e+07	8.57769e+06	1.39234e+07	8.76062e+06	6	6	6	6	High	High	High	High	1	Methylthio [C111; C141; C173]
TGGT1_257530	transcript=TGGT1_257530-t26_1 | gene=TGGT1_257530 | organism=Toxoplasma_gondii_GT1 | gene_product=Transporter, major facilitator family protein [Source:UniProtKB/TrEMBL;Acc:S7W7U8] | transcript_product=transporter, major facilitator family protein | location=TGGT1_chrVIIb:3924727-3926365(-) | protein_length=504 | sequence_SO=chromosome | SO=protein_coding_gene | is_pseudo=false	0	FALSE	23.558	18	5	17	5	504	54.5	6.71	25.16	5	1.229	0.3	0.956982	6.86577e+06	8.43493e+06	32.99	20.65	2	2	8.70782e+06	5.41338e+06	9.77116e+06	7.28143e+06	8.2163e+06	5.41338e+06	8.54902e+06	4.47183e+06	5	5	5	5	High	High	High	High	1	Phospho [S24; T32]; Methylthio [C113]
TGGT1_211090	transcript=TGGT1_211090-t26_1 | gene=TGGT1_211090 | organism=Toxoplasma_gondii_GT1 | gene_product=Aminotran_5 domain-containing protein [Source:UniProtKB/TrEMBL;Acc:S7UKQ3] | transcript_product=aminotransferase, class V superfamily protein | location=TGGT1_chrIV:1866785-1871989(-) | protein_length=632 | sequence_SO=chromosome | SO=protein_coding_gene | is_pseudo=false	0.02	FALSE	2.03	3	1	1	1	632	68.2	8.19	0	1	1.228	0.3	0.956982	111692	137176	84.69	NA	2	1	222993	55944	137176	NA	210406	55944	120018	NA	1	1	1	NA	High	Peak Found	Peak Found	Not Found	1
TGGT1_227360	transcript=TGGT1_227360-t26_1 | gene=TGGT1_227360 | organism=Toxoplasma_gondii_GT1 | gene_product=Ribosomal protein RPL3 [Source:UniProtKB/TrEMBL;Acc:A0A125YQV1] | transcript_product=ribosomal protein RPL3 | location=TGGT1_chrX:901297-903989(-) | protein_length=389 | sequence_SO=chromosome | SO=protein_coding_gene | is_pseudo=false	0	FALSE	58.853	37	14	72	14	389	44	10.3	125.02	14	1.228	0.3	0.956982	9.15488e+07	1.12385e+08	8.73	47	2	2	8.60646e+07	9.73826e+07	1.58758e+08	7.95568e+07	8.12065e+07	9.73826e+07	1.38901e+08	4.88591e+07	13	13	13	13	High	High	High	High	1	Methylthio [C114; C154; C161; C194; C250]
TGGT1_226030	transcript=TGGT1_226030-t26_1 | gene=TGGT1_226030 | organism=Toxoplasma_gondii_GT1 | gene_product=AGC kinase [Source:UniProtKB/TrEMBL;Acc:A0A125YVN2] | transcript_product=AGC kinase | location=TGGT1_chrX:1762934-1764677(+) | protein_length=343 | sequence_SO=chromosome | SO=protein_coding_gene | is_pseudo=false	0.001	FALSE	4.313	7	2	4	2	343	39.4	9.17	0	2	1.228	0.3	0.956982	606457	744433	41.8	0.65	2	2	822462	447182	747870	741012	776037	447182	654329	455086	2	2	2	2	Peak Found	High	High	High	1
TGGT1_231140	transcript=TGGT1_231140-t26_1 | gene=TGGT1_231140 | organism=Toxoplasma_gondii_GT1 | gene_product=40S ribosomal protein S25 [Source:UniProtKB/TrEMBL;Acc:S7V273] | transcript_product=ribosomal protein RPS25 | location=TGGT1_chrVIII:1259763-1260788(+) | protein_length=161 | sequence_SO=chromosome | SO=protein_coding_gene | is_pseudo=false	0	FALSE	13.913	26	4	11	4	161	18.7	10.33	18.67	4	1.227	0.3	0.956982	3.81431e+06	4.68061e+06	49.2	17.86	2	2	5.48386e+06	2.65305e+06	5.31419e+06	4.12256e+06	5.17431e+06	2.65305e+06	4.64951e+06	2.53184e+06	4	4	4	3	High	High	High	High	1
TGGT1_311240	transcript=TGGT1_311240-t26_1 | gene=TGGT1_311240 | organism=Toxoplasma_gondii_GT1 | gene_product=Putative DnaJ family chaperone [Source:UniProtKB/TrEMBL;Acc:S7UT35] | transcript_product=putative DnaJ family chaperone | location=TGGT1_chrXI:1865804-1870827(-) | protein_length=426 | sequence_SO=chromosome | SO=protein_coding_gene | is_pseudo=false	0	FALSE	10.021	10	3	10	3	426	47.4	6.84	0	3	1.225	0.29	0.956982	1.11894e+06	1.37106e+06	37.63	14.24	2	2	1.46971e+06	851891	1.23931e+06	1.51683e+06	1.38675e+06	851891	1.0843e+06	931546	3	3	3	3	High	High	High	High	1	Methylthio [C292]
TGGT1_260820	transcript=TGGT1_260820-t26_1 | gene=TGGT1_260820 | organism=Toxoplasma_gondii_GT1 | gene_product=ISP1_C domain-containing protein [Source:UniProtKB/TrEMBL;Acc:A0A125YZB3] | transcript_product=IMC sub-compartment protein ISP1 | location=TGGT1_chrVIIb:2000787-2002966(-) | protein_length=176 | sequence_SO=chromosome | SO=protein_coding_gene | is_pseudo=false	0	FALSE	24.589	35	5	32	5	176	19.4	7.69	32.53	5	1.225	0.29	0.956982	8.2819e+06	1.01467e+07	36.62	35.42	2	2	1.07946e+07	6.35408e+06	1.31059e+07	7.8556e+06	1.01853e+07	6.35408e+06	1.14667e+07	4.82445e+06	5	5	5	5	High	High	High	High	1	Methylthio [C142; C153; C166]
TGGT1_293690	transcript=TGGT1_293690-t26_1 | gene=TGGT1_293690 | organism=Toxoplasma_gondii_GT1 | gene_product=Profilin [Source:UniProtKB/TrEMBL;Acc:S7UIQ6] | transcript_product=profilin PRF | location=TGGT1_chrIa:496750-498091(-) | protein_length=165 | sequence_SO=chromosome | SO=protein_coding_gene | is_pseudo=false	0	FALSE	17.957	36	4	14	4	165	17.7	4.58	17.55	4	1.223	0.29	0.956982	3.73152e+06	4.56291e+06	36.08	24.01	2	2	4.84397e+06	2.87455e+06	3.84402e+06	5.41623e+06	4.57054e+06	2.87455e+06	3.36323e+06	3.32633e+06	4	4	4	4	High	High	High	High	1	Methylthio [C64]
TGGT1_258458	transcript=TGGT1_258458-t26_1 | gene=TGGT1_258458 | organism=Toxoplasma_gondii_GT1 | gene_product=hypothetical protein | transcript_product=hypothetical protein | location=TGGT1_chrVIIb:3374079-3375548(-) | protein_length=260 | sequence_SO=chromosome | SO=protein_coding_gene | is_pseudo=false	0	FALSE	14.876	23	5	7	5	260	28.8	5.92	8.44	5	1.223	0.29	0.956982	968908	1.18468e+06	54.9	67.91	2	2	1.45946e+06	643238	1.99909e+06	702049	1.37708e+06	643238	1.74905e+06	431157	4	3	4	3	High	Peak Found	High	Peak Found	1	Methylthio [C153]
TGGT1_298610	transcript=TGGT1_298610-t26_1 | gene=TGGT1_298610 | organism=Toxoplasma_gondii_GT1 | gene_product=GYF domain-containing protein [Source:UniProtKB/TrEMBL;Acc:S7ULJ6] | transcript_product=GYF domain-containing protein | location=TGGT1_chrXI:6511021-6521705(+) | protein_length=2331 | sequence_SO=chromosome | SO=protein_coding_gene | is_pseudo=false	0.007	FALSE	2.395	1	1	1	1	2331	237.8	9.17	0	1	1.223	0.29	0.956982	131576	160867	38.56	NA	2	1	174052	99465.8	NA	160867	164228	99465.8	NA	98795.1	1	1	NA	1	Peak Found	High	Not Found	Peak Found	1
TGGT1_317720	transcript=TGGT1_317720-t26_1 | gene=TGGT1_317720 | organism=Toxoplasma_gondii_GT1 | gene_product=Putative eukaryotic translation initiation factor 3 subunit 7 [Source:UniProtKB/TrEMBL;Acc:S7UGQ9] | transcript_product=putative eukaryotic translation initiation factor 3 subunit 7 | location=TGGT1_chrIV:2518527-2525070(+) | protein_length=609 | sequence_SO=chromosome | SO=protein_coding_gene | is_p…	0	FALSE	8.197	4	2	8	2	609	68.7	6.93	2.81	2	1.223	0.29	0.956982	2.34919e+06	2.87214e+06	16.68	39.36	2	2	2.64464e+06	2.08674e+06	3.82268e+06	2.15796e+06	2.49536e+06	2.08674e+06	3.34455e+06	1.32529e+06	2	2	2	2	High	High	High	High	1
TGGT1_311765	transcript=TGGT1_311765-t26_1 | gene=TGGT1_311765 | organism=Toxoplasma_gondii_GT1 | gene_product=hypothetical protein | transcript_product=hypothetical protein | location=TGGT1_chrXI:2229289-2235025(-) | protein_length=1481 | sequence_SO=chromosome | SO=protein_coding_gene | is_pseudo=false	0.037	FALSE	1.762	1	1	1	1	1481	161.7	7.37	0	1	1.223	0.29	0.956982	253902	310421	18.47	40.43	2	2	222642	289552	416538	231339	210074	289552	364439	142075	1	1	1	1	Peak Found	Peak Found	High	Peak Found	1	Phospho [Y1123; S1127]
TGGT1_232710	transcript=TGGT1_232710-t26_1 | gene=TGGT1_232710 | organism=Toxoplasma_gondii_GT1 | gene_product=40S ribosomal protein S3a [Source:UniProtKB/TrEMBL;Acc:A0A125YZM8] | transcript_product=ribosomal protein RPS3A | location=TGGT1_chrVIII:2231374-2232762(+) | protein_length=259 | sequence_SO=chromosome | SO=protein_coding_gene | is_pseudo=false	0	FALSE	67.295	49	14	68	14	259	29.4	9.57	109.04	14	1.222	0.29	0.956982	5.08282e+07	6.21252e+07	12.88	24.19	2	2	4.63917e+07	5.5689e+07	7.3841e+07	5.22684e+07	4.37731e+07	5.5689e+07	6.46052e+07	3.21002e+07	14	14	14	14	High	High	High	High	1	Methylthio [C87; C88; C96; C139; C154]
TGGT1_300140	transcript=TGGT1_300140-t26_1 | gene=TGGT1_300140 | organism=Toxoplasma_gondii_GT1 | gene_product=Putative elongation factor 1-gamma [Source:UniProtKB/TrEMBL;Acc:A0A125YG44] | transcript_product=putative elongation factor 1-gamma | location=TGGT1_chrXII:146844-149444(+) | protein_length=394 | sequence_SO=chromosome | SO=protein_coding_gene | is_pseudo=false	0	FALSE	17.562	13	5	18	5	394	44	6.3	23.27	5	1.222	0.29	0.956982	3.38675e+06	4.13867e+06	58.31	2.13	2	2	5.2502e+06	2.1847e+06	4.20156e+06	4.07671e+06	4.95385e+06	2.1847e+06	3.67604e+06	2.50368e+06	5	5	5	5	High	High	High	High	1
TGGT1_279390	transcript=TGGT1_279390-t26_1 | gene=TGGT1_279390 | organism=Toxoplasma_gondii_GT1 | gene_product=Peptidase_M24 domain-containing protein [Source:UniProtKB/TrEMBL;Acc:A0A125YVJ6] | transcript_product=putative proliferation-associated protein 2G4 | location=TGGT1_chrIX:43752-48368(-) | protein_length=462 | sequence_SO=chromosome | SO=protein_coding_gene | is_pseudo=false	0	FALSE	7.237	6	3	10	3	462	50.3	6.62	9.25	3	1.222	0.29	0.956982	951766	1.16287e+06	43.97	15.23	2	2	1.3127e+06	690073	1.04373e+06	1.29561e+06	1.2386e+06	690073	913182	795685	3	3	3	3	High	High	High	High	1
TGGT1_225050	transcript=TGGT1_225050-t26_1 | gene=TGGT1_225050 | organism=Toxoplasma_gondii_GT1 | gene_product=Adenosylhomocysteinase [Source:UniProtKB/TrEMBL;Acc:S7UW44] | transcript_product=putative adenosylhomocysteinase | location=TGGT1_chrX:2464799-2467238(-) | protein_length=588 | sequence_SO=chromosome | SO=protein_coding_gene | is_pseudo=false	0	FALSE	17.313	12	6	13	6	588	64.1	7.71	11.54	6	1.221	0.29	0.956982	1.97066e+06	2.40587e+06	39.58	12.91	2	2	2.6272e+06	1.47818e+06	2.19539e+06	2.63654e+06	2.4789e+06	1.47818e+06	1.9208e+06	1.61921e+06	5	5	5	5	High	High	High	High	1	Methylthio [C371]
TGGT1_226970	transcript=TGGT1_226970-t26_1 | gene=TGGT1_226970 | organism=Toxoplasma_gondii_GT1 | gene_product=Ribosomal_S17_N domain-containing protein [Source:UniProtKB/TrEMBL;Acc:A0A125YQR5] | transcript_product=ribosomal protein RPS11 | location=TGGT1_chrX:1087439-1090315(-) | protein_length=161 | sequence_SO=chromosome | SO=protein_coding_gene | is_pseudo=false	0	FALSE	19.647	36	5	30	5	161	18.7	10.61	56.57	5	1.221	0.29	0.956982	5.06705e+07	6.1851e+07	0.48	0.21	2	2	5.04981e+07	50843633	6.1943e+07	6.17591e+07	4.76476e+07	50843633	5.41954e+07	3.79288e+07	4	4	4	4	High	High	High	High	1	Methylthio [C60; C111; C116; C131]
TGGT1_226830	transcript=TGGT1_226830-t26_1 | gene=TGGT1_226830 | organism=Toxoplasma_gondii_GT1 | gene_product=DnaK family protein [Source:UniProtKB/TrEMBL;Acc:S7UXF0] | transcript_product=DnaK family protein | location=TGGT1_chrX:1215623-1218481(-) | protein_length=952 | sequence_SO=chromosome | SO=protein_coding_gene | is_pseudo=false	0.009	FALSE	2.253	2	1	1	1	952	104.9	5.95	0	1	1.22	0.29	0.956982	112292	137050	56.52	26.53	2	2	171462	73541.5	113352	165702	161784	73541.5	99174.6	101765	1	1	1	1	High	Peak Found	Peak Found	Peak Found	1
TGGT1_409080	transcript=TGGT1_409080-t26_1 | gene=TGGT1_409080 | organism=Toxoplasma_gondii_GT1 | gene_product=hypothetical protein | transcript_product=hypothetical protein | location=AAQM03000111:94-1737(-) | protein_length=548 | sequence_SO=contig | SO=protein_coding_gene | is_pseudo=false	0	FALSE	8.295	20	3	6	1	548	54.2	8.79	10.28	3	1.22	0.29	0.956982	219985	268447	42.41	4.65	2	2	161446	299749	259769	277415	152332	299749	227278	170372	1	1	1	1	Peak Found	High	Peak Found	Peak Found	1
TGGT1_320020	transcript=TGGT1_320020-t26_1 | gene=TGGT1_320020 | organism=Toxoplasma_gondii_GT1 | gene_product=Transporter, major facilitator family protein [Source:UniProtKB/TrEMBL;Acc:S7UJG3] | transcript_product=transporter, major facilitator family protein | location=TGGT1_chrIV:518139-519905(-) | protein_length=588 | sequence_SO=chromosome | SO=protein_coding_gene | is_pseudo=false	0	FALSE	11.724	8	3	11	3	588	62.9	5.12	10	3	1.22	0.29	0.956982	1.55035e+06	1.89118e+06	30.91	27.88	2	2	1.93601e+06	1.24151e+06	2.30937e+06	1.54872e+06	1.82673e+06	1.24151e+06	2.02052e+06	951135	3	3	3	3	High	High	High	High	1	Methylthio [C336]
TGGT1_309590	transcript=TGGT1_309590-t26_1 | gene=TGGT1_309590 | organism=Toxoplasma_gondii_GT1 | gene_product=Rhoptry protein ROP1 [Source:UniProtKB/TrEMBL;Acc:S7W7R3] | transcript_product=rhoptry protein ROP1 | location=TGGT1_chrXI:707942-709312(+) | protein_length=456 | sequence_SO=chromosome | SO=protein_coding_gene | is_pseudo=false	0	FALSE	19.618	11	5	26	5	456	49.5	5.22	48.34	5	1.219	0.29	0.956982	4.41172e+07	5.37747e+07	28.55	13.48	2	2	5.4139e+07	3.59506e+07	4.88729e+07	5.9168e+07	5.10831e+07	3.59506e+07	42760046	3.63376e+07	4	5	4	5	High	High	High	High	1
TGGT1_251540	transcript=TGGT1_251540-t26_1 | gene=TGGT1_251540 | organism=Toxoplasma_gondii_GT1 | gene_product=Dense granule protein GRA9 [Source:UniProtKB/TrEMBL;Acc:A0A125YWK4] | transcript_product=dense granule protein GRA9 | location=TGGT1_chrXII:5372511-5374084(+) | protein_length=318 | sequence_SO=chromosome | SO=protein_coding_gene | is_pseudo=false	0	FALSE	41.424	42	10	32	10	318	35.3	5.39	49.99	10	1.215	0.28	0.956982	5.5773e+06	6.77699e+06	89.11	95.99	2	2	1.17076e+07	2.65692e+06	1.54912e+07	2.96476e+06	1.10468e+07	2.65692e+06	1.35536e+07	1.82078e+06	10	9	10	7	High	High	High	High	1	Methylthio [C138; C201; C271]
TGGT1_238010	transcript=TGGT1_238010-t26_1 | gene=TGGT1_238010 | organism=Toxoplasma_gondii_GT1 | gene_product=Ribosomal_L23eN domain-containing protein [Source:UniProtKB/TrEMBL;Acc:S7W653] | transcript_product=ribosomal protein RPL23A | location=TGGT1_chrVI:8631-10722(+) | protein_length=167 | sequence_SO=chromosome | SO=protein_coding_gene | is_pseudo=false	0	FALSE	25.828	35	6	25	6	167	18.6	10.4	41.81	6	1.215	0.28	0.956982	1.9606e+07	2.38203e+07	0.56	26.83	2	2	1.96832e+07	1.95292e+07	2.88645e+07	1.96576e+07	1.85721e+07	1.95292e+07	2.52543e+07	1.20725e+07	6	6	6	6	High	High	High	High	1
TGGT1_239820	transcript=TGGT1_239820-t26_1 | gene=TGGT1_239820 | organism=Toxoplasma_gondii_GT1 | gene_product=D-3-phosphoglycerate dehydrogenase [Source:UniProtKB/TrEMBL;Acc:A0A125YMY8] | transcript_product=D-3-phosphoglycerate dehydrogenase | location=TGGT1_chrVI:931789-940557(-) | protein_length=604 | sequence_SO=chromosome | SO=protein_coding_gene | is_pseudo=false	0	FALSE	32.542	22	10	29	10	604	65.2	6.99	22.51	10	1.214	0.28	0.956982	3.13584e+06	3.80823e+06	23.94	35.96	2	2	3.72034e+06	2.64316e+06	4.93894e+06	2.93638e+06	3.51034e+06	2.64316e+06	4.32119e+06	1.80336e+06	9	9	9	9	High	High	High	High	1	Methylthio [C50; C238; C543]
TGGT1_215060	transcript=TGGT1_215060-t26_1 | gene=TGGT1_215060 | organism=Toxoplasma_gondii_GT1 | gene_product=Putative small GTP-binding protein sar1 [Source:UniProtKB/TrEMBL;Acc:A0A125YHQ9] | transcript_product=putative small GTP-binding protein sar1 | location=TGGT1_chrX:6612856-6615947(-) | protein_length=192 | sequence_SO=chromosome | SO=protein_coding_gene | is_pseudo=false	0	FALSE	10.543	11	2	7	2	192	22.1	7.64	19.09	2	1.213	0.28	0.956982	2.24628e+06	2.72582e+06	13.02	28.83	2	2	2.46348e+06	2.04822e+06	3.352e+06	2.21662e+06	2.32443e+06	2.04822e+06	2.93274e+06	1.36132e+06	2	2	2	2	High	High	High	High	1
TGGT1_269980	transcript=TGGT1_269980-t26_1 | gene=TGGT1_269980 | organism=Toxoplasma_gondii_GT1 | gene_product=Plug_translocon domain-containing protein [Source:UniProtKB/TrEMBL;Acc:A0A125YSW3] | transcript_product=putative preprotein translocase Sec61 | location=TGGT1_chrVIII:5481592-5486135(-) | protein_length=473 | sequence_SO=chromosome | SO=protein_coding_gene | is_pseudo=false	0	FALSE	16.317	10	5	18	5	473	52.1	8.81	32.36	5	1.213	0.28	0.956982	8.3401e+06	1.01151e+07	54.11	47.15	2	2	1.24803e+07	5.57335e+06	1.43063e+07	7.1517e+06	1.17759e+07	5.57335e+06	1.25169e+07	4.39216e+06	5	5	5	5	High	High	High	High	1
TGGT1_212950	transcript=TGGT1_212950-t26_1 | gene=TGGT1_212950 | organism=Toxoplasma_gondii_GT1 | gene_product=Putative ADP-ribosylation factor family protein 2 [Source:UniProtKB/TrEMBL;Acc:A0A125YQC1] | transcript_product=putative ADP-ribosylation factor family protein 2 | location=TGGT1_chrV:589943-592814(+) | protein_length=185 | sequence_SO=chromosome | SO=protein_coding_gene | is_pseudo=false	0.053	FALSE	1.606	6	1	1	1	185	21	6.8	1.83	1	1.212	0.28	0.956982	284358	344523	54.74	21.12	2	2	427758	189031	400459	296400	403612	189031	350371	182032	1	1	1	1	Peak Found	Peak Found	High	Peak Found	1
TGGT1_269330	transcript=TGGT1_269330-t26_1 | gene=TGGT1_269330 | organism=Toxoplasma_gondii_GT1 | gene_product=hypothetical protein | transcript_product=hypothetical protein | location=TGGT1_chrVIII:5887253-5890155(+) | protein_length=254 | sequence_SO=chromosome | SO=protein_coding_gene | is_pseudo=false	0	FALSE	9.443	17	4	9	4	254	28.4	5.33	5.45	4	1.211	0.28	0.956982	1.87999e+06	2.27609e+06	20.09	9.08	2	2	1.6294e+06	2.16912e+06	2.13441e+06	2.42717e+06	1.53742e+06	2.16912e+06	1.86745e+06	1.49062e+06	4	4	4	4	High	High	High	High	1
TGGT1_219850	transcript=TGGT1_219850-t26_1 | gene=TGGT1_219850 | organism=Toxoplasma_gondii_GT1 | gene_product=AA_TRNA_LIGASE_II domain-containing protein [Source:UniProtKB/TrEMBL;Acc:S7V2A6] | transcript_product=prolyl-tRNA synthetase (ProRS) | location=TGGT1_chrXII:529404-538395(-) | protein_length=830 | sequence_SO=chromosome | SO=protein_coding_gene | is_pseudo=false	0	FALSE	33.517	18	12	29	12	830	93.4	8.07	18.78	12	1.208	0.27	0.956982	4.5118e+06	5.45097e+06	37.65	28.24	2	2	5.92668e+06	3.43469e+06	6.67394e+06	4.45211e+06	5.59214e+06	3.43469e+06	5.83918e+06	2.73423e+06	12	10	12	10	High	High	High	High	1	Methylthio [C466; C591; C799]
TGGT1_312480	transcript=TGGT1_312480-t26_1 | gene=TGGT1_312480 | organism=Toxoplasma_gondii_GT1 | gene_product=Putative uracil phosphoribosyltransferase FUR1 [Source:UniProtKB/TrEMBL;Acc:A0A125YML2] | transcript_product=putative uracil phosphoribosyltransferase FUR1 | location=TGGT1_chrXI:2681744-2685832(+) | protein_length=244 | sequence_SO=chromosome | SO=protein_coding_gene | is_pseudo=false	0	FALSE	20.392	32	6	16	6	244	27.6	7.02	3.78	6	1.207	0.27	0.956982	1.69573e+06	2.04638e+06	27.95	44.74	2	2	2.07175e+06	1.38797e+06	2.83962e+06	1.47473e+06	1.9548e+06	1.38797e+06	2.48445e+06	905696	6	6	6	6	High	High	High	High	1
TGGT1_251690	transcript=TGGT1_251690-t26_1 | gene=TGGT1_251690 | organism=Toxoplasma_gondii_GT1 | gene_product=AA_TRNA_LIGASE_II domain-containing protein [Source:UniProtKB/TrEMBL;Acc:S7WG10] | transcript_product=putative seryl-tRNA synthetase, cytoplasmic | location=TGGT1_chrXII:5452731-5454179(+) | protein_length=482 | sequence_SO=chromosome | SO=protein_coding_gene | is_pseudo=false	0.039	FALSE	1.74	3	1	1	1	482	54.1	7.02	0	1	1.207	0.27	0.956982	245224	295905	26.41	9.58	2	2	296230	203001	276502	316670	279509	203001	241918	194480	1	1	1	1	Peak Found	Peak Found	Peak Found	High	1
TGGT1_286630	transcript=TGGT1_286630-t26_1 | gene=TGGT1_286630 | organism=Toxoplasma_gondii_GT1 | gene_product=Peroxiredoxin [Source:UniProtKB/TrEMBL;Acc:S7VWS3] | transcript_product=redoxin domain-containing protein | location=TGGT1_chrV:1606591-1607469(+) | protein_length=292 | sequence_SO=chromosome | SO=protein_coding_gene | is_pseudo=false	0.001	FALSE	4.016	7	1	2	1	292	31.1	8.79	2.35	1	1.206	0.27	0.956982	338609	408390	36.98	23.91	2	2	442551	259081	484401	344307	417571	259081	423814	211453	1	1	1	1	High	Peak Found	High	Peak Found	1
TGGT1_219540	transcript=TGGT1_219540-t26_1 | gene=TGGT1_219540 | organism=Toxoplasma_gondii_GT1 | gene_product=Alanine--tRNA ligase [Source:UniProtKB/TrEMBL;Acc:S7WHV1] | transcript_product=cytosolic tRNA-Ala synthetase | location=TGGT1_chrXII:800723-814444(-) | protein_length=1280 | sequence_SO=chromosome | SO=protein_coding_gene | is_pseudo=false	0	FALSE	22.177	6	7	20	7	1280	139.3	6.83	19.19	7	1.206	0.27	0.956982	3.56084e+06	4.2929e+06	35.9	9.87	2	2	4.61588e+06	2.74694e+06	4.00296e+06	4.60384e+06	4.35533e+06	2.74694e+06	3.50228e+06	2.82741e+06	6	6	6	6	High	High	High	High	1
TGGT1_247440	transcript=TGGT1_247440-t26_1 | gene=TGGT1_247440 | organism=Toxoplasma_gondii_GT1 | gene_product=hypothetical protein | transcript_product=hypothetical protein | location=TGGT1_chrXII:3270269-3271405(-) | protein_length=378 | sequence_SO=chromosome | SO=protein_coding_gene | is_pseudo=false	0	FALSE	27.347	26	7	17	7	378	40.1	9.66	16.49	7	1.205	0.27	0.956982	3.40932e+06	4.10961e+06	66.96	86.72	2	2	5.70316e+06	2.03807e+06	8.3932e+06	2.01221e+06	5.38124e+06	2.03807e+06	7.3434e+06	1.23578e+06	6	5	6	5	High	High	High	High	1
TGGT1_278260	transcript=TGGT1_278260-t26_1 | gene=TGGT1_278260 | organism=Toxoplasma_gondii_GT1 | gene_product=Polynucleotide adenylyltransferase [Source:UniProtKB/TrEMBL;Acc:S7WFV8] | transcript_product=polynucleotide adenylyltransferase | location=TGGT1_chrXII:6095676-6107525(-) | protein_length=2471 | sequence_SO=chromosome | SO=protein_coding_gene | is_pseudo=false	0.001	FALSE	4.124	1	2	4	2	2471	267.9	8.63	3.74	2	1.204	0.27	0.956982	1.10272e+07	1.32733e+07	15.56	30.92	2	2	1.23155e+07	9.87365e+06	1.65763e+07	1.06285e+07	11620367	9.87365e+06	1.4503e+07	6.52738e+06	2	2	2	1	High	Peak Found	High	Peak Found	1	Methylthio [C958]
TGGT1_270380	transcript=TGGT1_270380-t26_1 | gene=TGGT1_270380 | organism=Toxoplasma_gondii_GT1 | gene_product=Ribosomal_S13_N domain-containing protein [Source:UniProtKB/TrEMBL;Acc:S7V498] | transcript_product=ribosomal protein RPS13 | location=TGGT1_chrVIII:5238468-5240728(-) | protein_length=151 | sequence_SO=chromosome | SO=protein_coding_gene | is_pseudo=false	0	FALSE	18.36	44	6	20	6	151	17.2	10.55	15.27	6	1.204	0.27	0.956982	7.96317e+06	9.58454e+06	17.1	18.13	2	2	8.99199e+06	7.05207e+06	8.42529e+06	1.09033e+07	8.48442e+06	7.05207e+06	7.37149e+06	6.69617e+06	6	6	6	6	High	High	High	High	1
TGGT1_213388	transcript=TGGT1_213388-t26_1 | gene=TGGT1_213388 | organism=Toxoplasma_gondii_GT1 | gene_product=hypothetical protein | transcript_product=hypothetical protein | location=TGGT1_chrV:842545-846774(+) | protein_length=1342 | sequence_SO=chromosome | SO=protein_coding_gene | is_pseudo=false	0	FALSE	59.728	17	18	52	18	1342	145.4	8.18	63.9	18	1.203	0.27	0.956982	3.27263e+07	3.93719e+07	19.32	22.1	2	2	2.85231e+07	3.75489e+07	3.36325e+07	4.60906e+07	2.69131e+07	3.75489e+07	2.94259e+07	2.83062e+07	16	17	16	15	High	High	High	High	1	Methylthio [C365; C570; C902]
TGGT1_209800	transcript=TGGT1_209800-t26_1 | gene=TGGT1_209800 | organism=Toxoplasma_gondii_GT1 | gene_product=Formate/nitrite transporter protein [Source:UniProtKB/TrEMBL;Acc:A0A125YSC6] | transcript_product=formate/nitrite transporter protein | location=TGGT1_chrIb:1476667-1477905(+) | protein_length=412 | sequence_SO=chromosome | SO=protein_coding_gene | is_pseudo=false	0.006	FALSE	2.554	5	1	1	1	412	44.3	5.52	0	1	1.203	0.27	0.956982	1.25169e+06	1.50554e+06	10.69	46.08	2	2	1.35015e+06	1.16041e+06	2.11127e+06	1.0736e+06	1.27394e+06	1.16041e+06	1.8472e+06	659343	1	1	1	1	Peak Found	Peak Found	Peak Found	High	1	Phospho [S303; S307]
TGGT1_318460	transcript=TGGT1_318460-t26_1 | gene=TGGT1_318460 | organism=Toxoplasma_gondii_GT1 | gene_product=P-type ATPase of unknown pump specificity (type V) protein | transcript_product=P-type ATPase of unknown pump specificity (type V) protein | location=TGGT1_chrIV:1253650-1260940(-) | protein_length=1484 | sequence_SO=chromosome | SO=protein_coding_gene | is_pseudo=false	0.06	FALSE	1.533	1	1	1	1	1484	162.7	7.01	0	1	1.202	0.27	0.956982	208833	251101	3.11	55.36	2	2	213471	204295	379681	166065	201421	204295	332192	101988	1	1	1	1	Peak Found	High	Peak Found	Peak Found	1
TGGT1_313010	transcript=TGGT1_313010-t26_1 | gene=TGGT1_313010 | organism=Toxoplasma_gondii_GT1 | gene_product=DEAD (Asp-Glu-Ala-Asp) box polypeptide DDX6 [Source:UniProtKB/TrEMBL;Acc:S7W8B2] | transcript_product=DEAD (Asp-Glu-Ala-Asp) box polypeptide DDX6 | location=TGGT1_chrXI:2995385-2998767(-) | protein_length=475 | sequence_SO=chromosome | SO=protein_coding_gene | is_pseudo=false	0	FALSE	30.151	25	9	33	9	475	53.4	8.44	33.69	9	1.202	0.27	0.956982	1.21461e+07	1.45962e+07	13.34	37.6	2	2	1.33514e+07	1.10497e+07	1.91671e+07	1.11154e+07	1.25977e+07	1.10497e+07	1.67697e+07	6.82642e+06	9	9	9	9	High	High	High	High	1	Methylthio [C392]
TGGT1_213350	transcript=TGGT1_213350-t26_1 | gene=TGGT1_213350 | organism=Toxoplasma_gondii_GT1 | gene_product=Ribosomal protein RPS15 [Source:UniProtKB/TrEMBL;Acc:A0A125YHZ1] | transcript_product=ribosomal protein RPS15 | location=TGGT1_chrV:820008-821446(-) | protein_length=150 | sequence_SO=chromosome | SO=protein_coding_gene | is_pseudo=false	0	FALSE	19.256	29	3	15	3	150	17.1	10.2	21.66	3	1.199	0.26	0.956982	1.1421e+07	1.3691e+07	6.02	38.62	2	2	1.19181e+07	1.09447e+07	1.81187e+07	1.03454e+07	1.12454e+07	1.09447e+07	1.58525e+07	6.35351e+06	3	3	3	3	High	High	High	High	1	Methylthio [C72]
TGGT1_220100	transcript=TGGT1_220100-t26_1 | gene=TGGT1_220100 | organism=Toxoplasma_gondii_GT1 | gene_product=Pribosyltran_N domain-containing protein [Source:UniProtKB/TrEMBL;Acc:S7VVA0] | transcript_product=phosphoribosylpyrophosphate synthetase | location=TGGT1_chrV:29152-31918(+) | protein_length=557 | sequence_SO=chromosome | SO=protein_coding_gene | is_pseudo=false	0.048	FALSE	1.67	2	1	1	1	557	61	9.47	0	1	1.198	0.26	0.956982	304585	364974	52.21	10.31	2	2	448748	206735	339270	392626	423418	206735	296836	241128	1	1	1	1	High	Peak Found	Peak Found	Peak Found	1
TGGT1_224540	transcript=TGGT1_224540-t26_1 | gene=TGGT1_224540 | organism=Toxoplasma_gondii_GT1 | gene_product=hypothetical protein | transcript_product=hypothetical protein | location=TGGT1_chrX:2899044-2902293(-) | protein_length=969 | sequence_SO=chromosome | SO=protein_coding_gene | is_pseudo=false	0	FALSE	5.793	5	2	3	2	969	99.4	4.96	1.86	2	1.198	0.26	0.956982	464713	556828	120.72	97.86	2	2	130604	1.65353e+06	1.30503e+06	237587	123232	1.65353e+06	1.1418e+06	145912	1	2	2	1	Peak Found	High	Peak Found	High	1
TGGT1_293360	transcript=TGGT1_293360-t26_1 | gene=TGGT1_293360 | organism=Toxoplasma_gondii_GT1 | gene_product=hypothetical protein | transcript_product=hypothetical protein | location=TGGT1_chrIa:262977-264056(-) | protein_length=243 | sequence_SO=chromosome | SO=protein_coding_gene | is_pseudo=false	0	FALSE	149.79	87	14	128	14	243	26.7	4.46	270.77	14	1.197	0.26	0.956982	1.12956e+08	1.35237e+08	9.97	39.88	2	2	1.05255e+08	1.2122e+08	1.01209e+08	1.80706e+08	9.93138e+07	1.2122e+08	8.855e+07	1.10979e+08	16	16	16	16	High	High	High	High	1	Methylthio [C31; C169; C174]; Phospho [T27; T111; T113; T116; S120; S160; T161; S163]
TGGT1_263040	transcript=TGGT1_263040-t26_1 | gene=TGGT1_263040 | organism=Toxoplasma_gondii_GT1 | gene_product=Ribosomal protein RPS16 [Source:UniProtKB/TrEMBL;Acc:S7UY71] | transcript_product=ribosomal protein RPS16 | location=TGGT1_chrVIIb:830975-832663(+) | protein_length=211 | sequence_SO=chromosome | SO=protein_coding_gene | is_pseudo=false	0	FALSE	21.152	29	6	19	6	211	24	10.89	26.14	6	1.195	0.26	0.956982	1.68056e+07	2.00883e+07	26.76	36.29	2	2	2.03533e+07	1.38763e+07	2.61176e+07	1.54509e+07	1.92044e+07	1.38763e+07	2.28509e+07	9.48907e+06	6	6	6	6	High	High	High	High	1	Methylthio [C102]
TGGT1_289800	transcript=TGGT1_289800-t26_1 | gene=TGGT1_289800 | organism=Toxoplasma_gondii_GT1 | gene_product=GOLD domain-containing protein [Source:UniProtKB/TrEMBL;Acc:A0A125YFZ5] | transcript_product=hypothetical protein | location=TGGT1_chrIX:3269328-3270032(+) | protein_length=234 | sequence_SO=chromosome | SO=protein_coding_gene | is_pseudo=false	0.007	FALSE	2.509	6	1	3	1	234	25.9	9.72	0	1	1.194	0.26	0.956982	212153	253335	58.86	40.51	2	2	330443	136208	340152	188676	311790	136208	297607	115874	1	1	1	1	High	High	High	Peak Found	1
TGGT1_212250	transcript=TGGT1_212250-t26_1 | gene=TGGT1_212250 | organism=Toxoplasma_gondii_GT1 | gene_product=XPG N-terminal domain-containing protein [Source:UniProtKB/TrEMBL;Acc:S7UVX9] | transcript_product=XPG N-terminal domain-containing protein | location=TGGT1_chrX:3863526-3867619(+) | protein_length=767 | sequence_SO=chromosome | SO=protein_coding_gene | is_pseudo=false	0	FALSE	12.913	6	5	12	5	767	86.9	6.89	6.03	5	1.194	0.26	0.956982	1.09312e+06	1.30476e+06	48.26	44.47	2	2	1.55978e+06	766072	1.80662e+06	942309	1.47174e+06	766072	1.58065e+06	578711	5	4	5	5	High	High	High	High	1	Methylthio [C424; C578]
TGGT1_292220	transcript=TGGT1_292220-t26_1 | gene=TGGT1_292220 | organism=Toxoplasma_gondii_GT1 | gene_product=PCI domain-containing protein [Source:UniProtKB/TrEMBL;Acc:A0A125YZM3] | transcript_product=PCI domain-containing protein | location=TGGT1_chrIX:4423653-4430460(+) | protein_length=561 | sequence_SO=chromosome | SO=protein_coding_gene | is_pseudo=false	0.023	FALSE	1.941	3	1	2	1	561	61.6	7.49	0	1	1.193	0.25	0.956982	246522	294080	NA	NA	1	1	246522	NA	294080	NA	232607	NA	257297	NA	1	NA	1	NA	Peak Found	Not Found	High	High	1
TGGT1_318700	transcript=TGGT1_318700-t26_1 | gene=TGGT1_318700 | organism=Toxoplasma_gondii_GT1 | gene_product=Eukaryotic translation initiation factor 6 [Source:UniProtKB/TrEMBL;Acc:S7UJK7] | transcript_product=putative eukaryotic initiation factor-6 | location=TGGT1_chrIV:1082314-1085682(+) | protein_length=264 | sequence_SO=chromosome | SO=protein_coding_gene | is_pseudo=false	0.013	FALSE	2.18	6	1	1	1	264	28.6	5.2	0	1	1.191	0.25	0.956982	137194	163464	17.05	54.4	2	2	154863	121541	245205	108972	146121	121541	214536	66924.3	1	1	1	1	Peak Found	Peak Found	High	Peak Found	1
TGGT1_263050	transcript=TGGT1_263050-t26_1 | gene=TGGT1_263050 | organism=Toxoplasma_gondii_GT1 | gene_product=60S ribosomal protein L13 [Source:UniProtKB/TrEMBL;Acc:S7UXX9] | transcript_product=ribosomal protein RPL13 | location=TGGT1_chrVIIb:826699-830544(-) | protein_length=355 | sequence_SO=chromosome | SO=protein_coding_gene | is_pseudo=false	0	FALSE	26.033	24	8	41	8	355	39.7	11.18	62.96	8	1.191	0.25	0.956982	2.50434e+07	2.98162e+07	25.15	38.81	2	2	2.99751e+07	2.0923e+07	3.95157e+07	2.24975e+07	2.82831e+07	2.0923e+07	3.45732e+07	1.38167e+07	8	8	8	8	High	High	High	High	1
TGGT1_310640	transcript=TGGT1_310640-t26_1 | gene=TGGT1_310640 | organism=Toxoplasma_gondii_GT1 | gene_product=PNP_UDP_1 domain-containing protein [Source:UniProtKB/TrEMBL;Acc:A0A125YRW3] | transcript_product=phosphorylase family protein | location=TGGT1_chrXI:1460710-1463812(-) | protein_length=303 | sequence_SO=chromosome | SO=protein_coding_gene | is_pseudo=false	0.003	FALSE	2.779	3	1	1	1	303	33	7.11	1.75	1	1.19	0.25	0.956982	320225	380970	28.72	11.97	2	2	393453	260625	349988	414694	371244	260625	306213	254681	1	1	1	1	Peak Found	Peak Found	Peak Found	High	1
TGGT1_269950	transcript=TGGT1_269950-t26_1 | gene=TGGT1_269950 | organism=Toxoplasma_gondii_GT1 | gene_product=Thioredoxin domain-containing protein [Source:UniProtKB/TrEMBL;Acc:S7V464] | transcript_product=hypothetical protein | location=TGGT1_chrVIII:5501073-5504592(-) | protein_length=944 | sequence_SO=chromosome | SO=protein_coding_gene | is_pseudo=false	0	FALSE	14.245	8	5	7	5	944	104.6	5.73	7.78	5	1.189	0.25	0.956982	1.28971e+06	1.5337e+06	33.34	29.11	2	2	1.64001e+06	1.01423e+06	1.88987e+06	1.24466e+06	1.54744e+06	1.01423e+06	1.6535e+06	764397	5	5	5	5	High	High	Peak Found	High	1
TGGT1_249250	transcript=TGGT1_249250-t26_1 | gene=TGGT1_249250 | organism=Toxoplasma_gondii_GT1 | gene_product=Ribosomal protein RPL35A [Source:UniProtKB/TrEMBL;Acc:A0A125YPQ6] | transcript_product=ribosomal protein RPL35A | location=TGGT1_chrXII:4329155-4330881(+) | protein_length=112 | sequence_SO=chromosome | SO=protein_coding_gene | is_pseudo=false	0	FALSE	16.351	34	4	21	4	112	12.8	10.95	29.4	4	1.188	0.25	0.956982	1.57692e+07	1.87304e+07	10.43	30.37	2	2	1.69787e+07	1.46459e+07	2.32962e+07	1.50594e+07	1.60203e+07	1.46459e+07	20382367	9.24861e+06	4	4	4	4	High	High	High	High	1	Methylthio [C32]
TGGT1_305520	transcript=TGGT1_305520-t26_1 | gene=TGGT1_305520 | organism=Toxoplasma_gondii_GT1 | gene_product=S5 DRBM domain-containing protein [Source:UniProtKB/TrEMBL;Acc:A0A125YUG2] | transcript_product=ribosomal protein RPS2 | location=TGGT1_chrIX:5229307-5231745(+) | protein_length=269 | sequence_SO=chromosome | SO=protein_coding_gene | is_pseudo=false	0	FALSE	62.91	47	9	62	9	269	29.3	10.2	116.24	9	1.188	0.25	0.956982	5.21537e+07	6.19387e+07	0.5	19.82	2	2	5.23386e+07	5.19694e+07	7.13214e+07	5.37902e+07	4.93843e+07	5.19694e+07	6.24008e+07	3.30348e+07	9	9	9	9	High	High	High	High	1	Methylthio [C80; C119]
TGGT1_207440	transcript=TGGT1_207440-t26_1 | gene=TGGT1_207440 | organism=Toxoplasma_gondii_GT1 | gene_product=S4 RNA-binding domain-containing protein [Source:UniProtKB/TrEMBL;Acc:A0A125YYJ0] | transcript_product=ribosomal protein RPS4 | location=TGGT1_chrIb:77395-80548(-) | protein_length=312 | sequence_SO=chromosome | SO=protein_coding_gene | is_pseudo=false	0	FALSE	52.456	35	10	76	10	312	35.5	10.18	148.03	10	1.187	0.25	0.956982	1.11723e+08	1.32603e+08	6.25	20.22	2	2	1.16777e+08	1.06888e+08	1.5314e+08	1.14821e+08	1.10185e+08	1.06888e+08	1.33986e+08	7.05164e+07	10	11	10	11	High	High	High	High	1	Methylthio [C130]
TGGT1_288380	transcript=TGGT1_288380-t26_1 | gene=TGGT1_288380 | organism=Toxoplasma_gondii_GT1 | gene_product=HATPase_c domain-containing protein [Source:UniProtKB/TrEMBL;Acc:A0A125YVB6] | transcript_product=heat shock protein HSP90 | location=TGGT1_chrIX:2294323-2298742(+) | protein_length=708 | sequence_SO=chromosome | SO=protein_coding_gene | is_pseudo=false	0	FALSE	84.35	34	22	90	22	708	81.9	5.03	147.4	22	1.187	0.25	0.956982	4.11599e+07	4.88438e+07	46.44	12.99	2	2	5.78875e+07	2.9266e+07	5.35551e+07	4.4547e+07	5.462e+07	2.9266e+07	4.68566e+07	2.73582e+07	19	19	20	21	High	High	High	High	1	Methylthio [C549]
TGGT1_226710	transcript=TGGT1_226710-t26_1 | gene=TGGT1_226710 | organism=Toxoplasma_gondii_GT1 | gene_product=hypothetical protein | transcript_product=hypothetical protein | location=TGGT1_chrX:1323840-1327236(-) | protein_length=297 | sequence_SO=chromosome | SO=protein_coding_gene | is_pseudo=false	0	FALSE	6.202	6	1	4	1	297	33.3	8.88	9.62	1	1.187	0.25	0.956982	876163	1.03968e+06	10.71	45.29	2	2	945242	812133	1.44896e+06	746007	891887	812133	1.26773e+06	458154	1	1	1	1	High	High	High	High	1
TGGT1_254720	transcript=TGGT1_254720-t26_1 | gene=TGGT1_254720 | organism=Toxoplasma_gondii_GT1 | gene_product=Dense granule protein GRA8 [Source:UniProtKB/TrEMBL;Acc:A0A125YYI5] | transcript_product=dense granule protein GRA8 | location=TGGT1_chrIII:1884681-1885484(+) | protein_length=267 | sequence_SO=chromosome | SO=protein_coding_gene | is_pseudo=false	0	FALSE	22.264	15	4	31	4	267	28.5	10.76	45.68	4	1.186	0.25	0.956982	1.42783e+07	1.69327e+07	32.65	64.1	2	2	1.80622e+07	1.1287e+07	2.76061e+07	1.03859e+07	17042696	1.1287e+07	2.41533e+07	6.37842e+06	4	4	4	4	High	High	High	High	1
TGGT1_221390	transcript=TGGT1_221390-t26_1 | gene=TGGT1_221390 | organism=Toxoplasma_gondii_GT1 | gene_product=hypothetical protein | transcript_product=hypothetical protein | location=TGGT1_chrII:286177-292066(-) | protein_length=875 | sequence_SO=chromosome | SO=protein_coding_gene | is_pseudo=false	0	FALSE	10.678	7	4	8	4	875	96.4	5.25	7.7	4	1.186	0.25	0.956982	2.04209e+06	2.42122e+06	12.5	40.6	2	2	2.23138e+06	1.86887e+06	3.25322e+06	1.802e+06	2.10543e+06	1.86887e+06	2.84632e+06	1.10668e+06	4	4	4	4	High	High	High	High	1
TGGT1_277500	transcript=TGGT1_277500-t26_1 | gene=TGGT1_277500 | organism=Toxoplasma_gondii_GT1 | gene_product=AAA domain-containing protein [Source:UniProtKB/TrEMBL;Acc:S7WFK2] | transcript_product=putative 26S proteasome regulatory subunit 7 | location=TGGT1_chrXII:6576106-6581002(+) | protein_length=476 | sequence_SO=chromosome | SO=protein_coding_gene | is_pseudo=false	0	FALSE	6.266	5	2	2	1	476	52.4	7.17	0	2	1.185	0.25	0.956982	171847	203683	47.57	6.58	2	2	243869	121096	194419	213388	230104	121096	170102	131050	1	1	1	1	Peak Found	Peak Found	Peak Found	High	1
TGGT1_218540	transcript=TGGT1_218540-t26_1 | gene=TGGT1_218540 | organism=Toxoplasma_gondii_GT1 | gene_product=AB hydrolase-1 domain-containing protein [Source:UniProtKB/TrEMBL;Acc:A0A125YXV8] | transcript_product=putative peptidase S15 | location=TGGT1_chrXII:1410645-1414447(-) | protein_length=412 | sequence_SO=chromosome | SO=protein_coding_gene | is_pseudo=false	0	FALSE	6.539	9	3	6	3	412	45.1	8.91	0	3	1.185	0.25	0.956982	441899	523723	9.29	17.49	2	2	471935	413775	593060	462492	445296	413775	518882	284036	3	3	3	3	High	High	High	Peak Found	1
TGGT1_309570	transcript=TGGT1_309570-t26_1 | gene=TGGT1_309570 | organism=Toxoplasma_gondii_GT1 | gene_product=DEAD/DEAH box helicase domain-containing protein [Source:UniProtKB/TrEMBL;Acc:S7USV3] | transcript_product=DEAD/DEAH box helicase domain-containing protein | location=TGGT1_chrXI:692622-695126(-) | protein_length=834 | sequence_SO=chromosome | SO=protein_coding_gene | is_pseudo=false	0	FALSE	7.965	4	3	5	3	834	91.2	9.11	1.64	3	1.184	0.24	0.956982	367705	435492	20.29	47.02	2	2	424871	318232	615290	308234	400888	318232	538332	189299	3	3	3	3	High	High	High	Peak Found	1
TGGT1_214270	transcript=TGGT1_214270-t26_1 | gene=TGGT1_214270 | organism=Toxoplasma_gondii_GT1 | gene_product=Tr-type G domain-containing protein [Source:UniProtKB/TrEMBL;Acc:S7UR99] | transcript_product=putative translation initiation factor IF-2 | location=TGGT1_chrX:6085732-6096115(-) | protein_length=1146 | sequence_SO=chromosome | SO=protein_coding_gene | is_pseudo=false	0	FALSE	15.089	5	5	8	5	1146	126.2	6.35	5.29	5	1.184	0.24	0.956982	6.91286e+06	8.18562e+06	28.48	5.39	2	2	5.63616e+06	8.47876e+06	8.50381e+06	7.87934e+06	5.31802e+06	8.47876e+06	7.44018e+06	4.83903e+06	4	5	4	5	High	High	High	High	1	Methylthio [C723; C1055; C1119]
TGGT1_237180	transcript=TGGT1_237180-t26_1 | gene=TGGT1_237180 | organism=Toxoplasma_gondii_GT1 | gene_product=hypothetical protein | transcript_product=hypothetical protein | location=TGGT1_chrX:5659103-5659870(-) | protein_length=255 | sequence_SO=chromosome | SO=protein_coding_gene | is_pseudo=false	0	FALSE	6.266	10	3	6	3	255	29.2	8.97	5.47	3	1.184	0.24	0.956982	2.37578e+07	2.81236e+07	24.07	16.64	2	2	2.82131e+07	2.00061e+07	3.16529e+07	2.49879e+07	2.66205e+07	2.00061e+07	2.76939e+07	1.53461e+07	3	3	3	2	High	High	High	High	1
TGGT1_288720	transcript=TGGT1_288720-t26_1 | gene=TGGT1_288720 | organism=Toxoplasma_gondii_GT1 | gene_product=Ribosomal_L16 domain-containing protein [Source:UniProtKB/TrEMBL;Acc:A0A125YSQ3] | transcript_product=ribosomal protein RPL10 | location=TGGT1_chrIX:2518172-2520490(-) | protein_length=221 | sequence_SO=chromosome | SO=protein_coding_gene | is_pseudo=false	0	FALSE	37.912	33	8	42	8	221	24.8	10.18	59.82	8	1.18	0.24	0.956982	6.83398e+07	8.06269e+07	6.73	38.15	2	2	7.16712e+07	6.51631e+07	1.06315e+08	6.11458e+07	6.76257e+07	6.51631e+07	9.30172e+07	3.75522e+07	8	9	9	9	High	High	High	High	1	Methylthio [C105]
TGGT1_263870	transcript=TGGT1_263870-t26_1 | gene=TGGT1_263870 | organism=Toxoplasma_gondii_GT1 | gene_product=GST C-terminal domain-containing protein [Source:UniProtKB/TrEMBL;Acc:S7WDQ1] | transcript_product=glutamate-tRNA ligase | location=TGGT1_chrVIIb:247108-256643(-) | protein_length=828 | sequence_SO=chromosome | SO=protein_coding_gene | is_pseudo=false	0.001	FALSE	3.955	6	2	2	2	828	92.5	8.85	0	2	1.179	0.24	0.956982	221739	261539	41.11	17.52	2	2	299112	164380	296214	230923	282228	164380	259165	141819	2	2	2	2	High	Peak Found	Peak Found	Peak Found	1	Methylthio [C481]
TGGT1_211710	transcript=TGGT1_211710-t26_1 | gene=TGGT1_211710 | organism=Toxoplasma_gondii_GT1 | gene_product=TB2/DP1, HVA22 family protein [Source:UniProtKB/TrEMBL;Acc:S7VZ61] | transcript_product=TB2/DP1, HVA22 family protein | location=TGGT1_chrIV:1512749-1513255(+) | protein_length=168 | sequence_SO=chromosome | SO=protein_coding_gene | is_pseudo=false	0.064	FALSE	1.499	11	1	1	1	168	19	7.55	0	1	1.179	0.24	0.956982	81570.5	96205	NA	NA	1	1	81570.5	NA	96205	NA	76966.2	NA	84172	NA	1	NA	1	NA	Peak Found	Not Found	High	Not Found	1
TGGT1_314810	transcript=TGGT1_314810-t26_1 | gene=TGGT1_314810 | organism=Toxoplasma_gondii_GT1 | gene_product=Ribosomal protein RPL7 [Source:UniProtKB/TrEMBL;Acc:A0A125YUF5] | transcript_product=ribosomal protein RPL7 | location=TGGT1_chrXI:4256933-4260657(+) | protein_length=258 | sequence_SO=chromosome | SO=protein_coding_gene | is_pseudo=false	0	FALSE	26.146	31	7	16	7	258	30.1	10.36	26.4	7	1.179	0.24	0.956982	4.39049e+06	5.17437e+06	48.44	7.26	2	2	6.27372e+06	3.07257e+06	4.91518e+06	5.44723e+06	5.91959e+06	3.07257e+06	4.3004e+06	3.34537e+06	7	6	7	7	High	High	High	High	1	Methylthio [C205]
TGGT1_213040	transcript=TGGT1_213040-t26_1 | gene=TGGT1_213040 | organism=Toxoplasma_gondii_GT1 | gene_product=hypothetical protein | transcript_product=hypothetical protein | location=TGGT1_chrV:678396-686336(+) | protein_length=1824 | sequence_SO=chromosome | SO=protein_coding_gene | is_pseudo=false	0	FALSE	68.328	15	19	48	19	1824	196.7	8.85	37.61	19	1.179	0.24	0.956982	6.16798e+07	7.26906e+07	8.53	25.12	2	2	5.80643e+07	6.55203e+07	8.69855e+07	6.07449e+07	5.47868e+07	6.55203e+07	7.61057e+07	3.7306e+07	19	19	17	18	High	High	High	High	1	Methylthio [C1470; C1740]
TGGT1_260520	transcript=TGGT1_260520-t26_1 | gene=TGGT1_260520 | organism=Toxoplasma_gondii_GT1 | gene_product=hypothetical protein | transcript_product=hypothetical protein | location=TGGT1_chrVIIb:2164696-2167131(-) | protein_length=742 | sequence_SO=chromosome | SO=protein_coding_gene | is_pseudo=false	0	FALSE	8.205	5	3	5	3	742	77	7.71	1.72	3	1.177	0.24	0.956982	370951	436753	100.26	105.99	2	2	898799	153098	1.15421e+06	165267	848065	153098	1.00985e+06	101497	2	1	2	1	High	High	High	Peak Found	1
TGGT1_290660	transcript=TGGT1_290660-t26_1 | gene=TGGT1_290660 | organism=Toxoplasma_gondii_GT1 | gene_product=RNA recognition motif-containing protein [Source:UniProtKB/TrEMBL;Acc:A0A125YNP2] | transcript_product=RNA recognition motif-containing protein | location=TGGT1_chrIX:3628759-3632147(-) | protein_length=446 | sequence_SO=chromosome | SO=protein_coding_gene | is_pseudo=false	0	FALSE	11.901	10	2	6	2	446	48.3	7.81	5.43	2	1.177	0.24	0.956982	715835	842727	31.67	8.94	2	2	898975	570005	897780	791049	848232	570005	785489	485816	2	2	2	2	High	High	High	High	1
TGGT1_233480	transcript=TGGT1_233480-t26_1 | gene=TGGT1_233480 | organism=Toxoplasma_gondii_GT1 | gene_product=SAG-related sequence SRS29C [Source:UniProtKB/TrEMBL;Acc:S7WBY8] | transcript_product=SAG-related sequence SRS29C | location=TGGT1_chrVIII:2667297-2668415(+) | protein_length=372 | sequence_SO=chromosome | SO=protein_coding_gene | is_pseudo=false	0	FALSE	20.106	21	5	19	5	372	39.2	7.52	20.43	5	1.177	0.23	0.956982	5.70438e+06	6.71299e+06	64.56	55.25	2	2	9.33816e+06	3.48462e+06	4.44345e+06	1.01417e+07	8.81105e+06	3.48462e+06	3.88768e+06	6.22846e+06	5	4	5	5	High	High	High	High	1	Methylthio [C177; C197; C303]
TGGT1_253290	transcript=TGGT1_253290-t26_1 | gene=TGGT1_253290 | organism=Toxoplasma_gondii_GT1 | gene_product=Valyl-tRNA synthetase [Source:UniProtKB/TrEMBL;Acc:S7W1N6] | transcript_product=valyl-tRNA synthetase | location=TGGT1_chrIII:807307-819700(+) | protein_length=1106 | sequence_SO=chromosome | SO=protein_coding_gene | is_pseudo=false	0.047	FALSE	1.694	1	1	2	1	1106	124.8	6.64	0	1	1.176	0.23	0.956982	1.18561e+06	1.39386e+06	0.25	32.92	2	2	1.18766e+06	1.18355e+06	1.76689e+06	1.09959e+06	1.12062e+06	1.18355e+06	1.54589e+06	675303	1	1	1	1	High	Peak Found	High	Peak Found	1
TGGT1_318510	transcript=TGGT1_318510-t26_1 | gene=TGGT1_318510 | organism=Toxoplasma_gondii_GT1 | gene_product=Vesicle-fusing ATPase [Source:UniProtKB/TrEMBL;Acc:A0A125YPA5] | transcript_product=putative N-ethylmaleimide-sensitive fusion protein | location=TGGT1_chrIV:1205264-1217814(-) | protein_length=751 | sequence_SO=chromosome | SO=protein_coding_gene | is_pseudo=false	0.001	FALSE	4.002	2	1	3	1	751	83.4	6.51	4.58	1	1.175	0.23	0.956982	517015	607522	38.99	16.68	2	2	686145	389574	683934	539647	647415	389574	598390	331420	1	1	1	1	High	Peak Found	High	High	1
TGGT1_237015	transcript=TGGT1_237015-t26_1 | gene=TGGT1_237015 | organism=Toxoplasma_gondii_GT1 | gene_product=hypothetical protein | transcript_product=hypothetical protein | location=TGGT1_chrX:5566838-5567632(-) | protein_length=264 | sequence_SO=chromosome | SO=protein_coding_gene | is_pseudo=false	0	FALSE	15.026	17	3	5	3	264	29.3	8.73	10.78	3	1.175	0.23	0.956982	1.50819e+06	1.77199e+06	47.89	78.61	2	2	2.14566e+06	1.06011e+06	3.3167e+06	946706	2.02455e+06	1.06011e+06	2.90185e+06	581411	3	3	3	3	High	Peak Found	High	Peak Found	1
TGGT1_202550	transcript=TGGT1_202550-t26_1 | gene=TGGT1_202550 | organism=Toxoplasma_gondii_GT1 | gene_product=FCP1 homology domain-containing protein [Source:UniProtKB/TrEMBL;Acc:S7UV08] | transcript_product=NLI interacting factor family phosphatase | location=TGGT1_chrVIIa:3125453-3133382(+) | protein_length=2212 | sequence_SO=chromosome | SO=protein_coding_gene | is_pseudo=false	0	FALSE	154.501	28	38	110	38	2212	232.8	6.96	129.79	38	1.174	0.23	0.956982	2.7526e+07	3.23141e+07	2.6	10.99	2	2	2.80375e+07	2.70238e+07	2.98934e+07	3.49309e+07	2.64549e+07	2.70238e+07	2.61544e+07	2.14525e+07	35	37	35	38	High	High	High	High	1	Methylthio [C247; C834; C865; C1288; C1518; C1541; C1982; C2053; C2144]; Phospho [T1090]
TGGT1_227280	transcript=TGGT1_227280-t26_1 | gene=TGGT1_227280 | organism=Toxoplasma_gondii_GT1 | gene_product=Dense granule protein GRA3 [Source:UniProtKB/TrEMBL;Acc:A0A125YJQ7] | transcript_product=dense granule protein GRA3 | location=TGGT1_chrX:956231-956899(-) | protein_length=222 | sequence_SO=chromosome | SO=protein_coding_gene | is_pseudo=false	0	FALSE	12.768	9	3	21	3	222	24.2	9.44	35.16	3	1.174	0.23	0.956982	2.02372e+07	2.37545e+07	49.98	72.97	2	2	2.92785e+07	1.39879e+07	4.20392e+07	1.34226e+07	2.76258e+07	1.39879e+07	3.67811e+07	8.24339e+06	2	3	3	3	High	High	High	High	1
TGGT1_220950	transcript=TGGT1_220950-t26_1 | gene=TGGT1_220950 | organism=Toxoplasma_gondii_GT1 | gene_product=hypothetical protein | transcript_product=hypothetical protein | location=TGGT1_chrII:72817-74397(+) | protein_length=334 | sequence_SO=chromosome | SO=protein_coding_gene | is_pseudo=false	0	FALSE	41.563	36	8	40	3	334	35.6	5.25	48.45	8	1.172	0.23	0.956982	7.54887e+06	8.84353e+06	7.19	60.26	2	2	7.94277e+06	7.17451e+06	1.39403e+07	5.61021e+06	7.49443e+06	7.17451e+06	1.21967e+07	3.44546e+06	3	3	3	3	High	High	High	High	1
TGGT1_293430	transcript=TGGT1_293430-t26_1 | gene=TGGT1_293430 | organism=Toxoplasma_gondii_GT1 | gene_product=hypothetical protein | transcript_product=hypothetical protein | location=TGGT1_chrIa:302881-304116(-) | protein_length=411 | sequence_SO=chromosome | SO=protein_coding_gene | is_pseudo=false	0.039	FALSE	1.744	3	1	2	1	411	44.6	5.14	0	1	1.171	0.23	0.956982	108748	127377	27.14	35.32	2	2	132071	89542.8	98694.4	164394	124616	89542.8	86350	100961	1	1	1	1	High	Peak Found	Peak Found	High	1	Methylthio [C292]
TGGT1_239760	transcript=TGGT1_239760-t26_1 | gene=TGGT1_239760 | organism=Toxoplasma_gondii_GT1 | gene_product=Ribosomal protein RPL22 [Source:UniProtKB/TrEMBL;Acc:A0A125YT45] | transcript_product=ribosomal protein RPL22 | location=TGGT1_chrVI:893982-895795(-) | protein_length=133 | sequence_SO=chromosome | SO=protein_coding_gene | is_pseudo=false	0.001	FALSE	4.293	8	1	8	1	133	15.1	9.89	14.97	1	1.171	0.23	0.956982	2.48121e+06	2.90583e+06	20.32	20.28	2	2	2.86743e+06	2146999	3.35719e+06	2.51515e+06	2.70558e+06	2146999	2937285	1.54466e+06	1	1	1	1	High	High	High	High	1
TGGT1_223920	transcript=TGGT1_223920-t26_1 | gene=TGGT1_223920 | organism=Toxoplasma_gondii_GT1 | gene_product=Rhoptry neck protein RON3 [Source:UniProtKB/TrEMBL;Acc:S7UWM8] | transcript_product=rhoptry neck protein RON3 | location=TGGT1_chrX:3357300-3367973(+) | protein_length=1958 | sequence_SO=chromosome | SO=protein_coding_gene | is_pseudo=false	0	FALSE	105.13	18	32	87	32	1958	222.9	9.16	77.62	32	1.17	0.23	0.956982	1.36974e+07	1.60313e+07	27.62	51.95	2	2	1.66938e+07	1.12389e+07	2.35677e+07	1.09049e+07	1.57515e+07	1.12389e+07	2.06199e+07	6.69717e+06	31	30	32	27	High	High	High	High	1	Methylthio [C471; C663; C1732; C1796]
TGGT1_311230	transcript=TGGT1_311230-t26_1 | gene=TGGT1_311230 | organism=Toxoplasma_gondii_GT1 | gene_product=hypothetical protein | transcript_product=hypothetical protein | location=TGGT1_chrXI:1844321-1862670(+) | protein_length=4603 | sequence_SO=chromosome | SO=protein_coding_gene | is_pseudo=false	0	FALSE	516.305	23	85	434	85	4603	494.5	4.88	803.39	85	1.17	0.23	0.956982	2.73139e+08	3.19607e+08	11.85	6.91	2	2	2.97081e+08	2.51128e+08	3.04362e+08	3.35616e+08	2.80312e+08	2.51128e+08	2.66293e+08	2.06116e+08	81	86	82	89	High	High	High	High	1	Methylthio [C2318; C2349; C2786; C2932; C3210; C3246; C3374; C3444; C3447; C3522; C3614; C4403]; Phospho [S3126; S3128; S3198; S3214; S3215; S3221; S3724; S3840; S3910; S4193; S4559]
TGGT1_243960	transcript=TGGT1_243960-t26_1 | gene=TGGT1_243960 | organism=Toxoplasma_gondii_GT1 | gene_product=NTF2 domain-containing protein [Source:UniProtKB/TrEMBL;Acc:A0A125YLE0] | transcript_product=nuclear transport factor 2 (ntf2) domain-containing protein | location=TGGT1_chrVI:2828443-2833407(-) | protein_length=797 | sequence_SO=chromosome | SO=protein_coding_gene | is_pseudo=false	0	FALSE	27.828	11	8	22	8	797	84.1	9.04	23.65	8	1.169	0.22	0.956982	2.8831e+06	3.36966e+06	36.17	27.89	2	2	3.745e+06	2.21957e+06	4.11513e+06	2.75923e+06	3.53361e+06	2.21957e+06	3.60042e+06	1.69456e+06	8	7	8	8	High	High	High	High	1
TGGT1_251500	transcript=TGGT1_251500-t26_1 | gene=TGGT1_251500 | organism=Toxoplasma_gondii_GT1 | gene_product=Eukaryotic translation initiation factor 3 subunit H [Source:UniProtKB/TrEMBL;Acc:S7UZZ8] | transcript_product=putative eukaryotic initiation factor-3, subunit 3 | location=TGGT1_chrXII:5353371-5356184(+) | protein_length=600 | sequence_SO=chromosome | SO=protein_coding_gene | is_pseudo=false	0	FALSE	8.108	5	3	7	3	600	65.6	8.15	9.17	3	1.169	0.22	0.956982	1.08959e+06	1.27341e+06	50.05	45.48	2	2	1.57733e+06	752666	1.77735e+06	912352	1.4883e+06	752666	1.55504e+06	560313	3	3	3	3	High	High	High	High	1
TGGT1_297070	transcript=TGGT1_297070-t26_1 | gene=TGGT1_297070 | organism=Toxoplasma_gondii_GT1 | gene_product=Alpha-carbonic anhydrase domain-containing protein [Source:UniProtKB/TrEMBL;Acc:A0A125YMC5] | transcript_product=hypothetical protein | location=TGGT1_chrII:1492810-1494671(-) | protein_length=519 | sequence_SO=chromosome | SO=protein_coding_gene | is_pseudo=false	0	FALSE	22.108	17	6	6	6	519	58.1	6.33	6.61	6	1.169	0.22	0.956982	930553	1.08752e+06	78.9	70.55	2	2	1.74684e+06	495712	628853	1.88071e+06	1.64824e+06	495712	550198	1.15502e+06	5	4	4	6	High	Peak Found	Peak Found	High	1	Methylthio [C134]
TGGT1_260440	transcript=TGGT1_260440-t26_1 | gene=TGGT1_260440 | organism=Toxoplasma_gondii_GT1 | gene_product=NPL domain-containing protein [Source:UniProtKB/TrEMBL;Acc:S7UYY1] | transcript_product=nuclear factor NF3 | location=TGGT1_chrVIIb:2242975-2247472(-) | protein_length=312 | sequence_SO=chromosome | SO=protein_coding_gene | is_pseudo=false	0	FALSE	6.128	5	2	8	2	312	34.1	4.31	15.07	2	1.167	0.22	0.956982	1.70089e+06	1.98424e+06	60.67	17.72	2	2	2.69081e+06	1.07515e+06	1.74944e+06	2.25055e+06	2.53893e+06	1.07515e+06	1.53063e+06	1.38216e+06	2	2	2	2	High	High	High	High	1
TGGT1_226250	transcript=TGGT1_226250-t26_1 | gene=TGGT1_226250 | organism=Toxoplasma_gondii_GT1 | gene_product=DEAD (Asp-Glu-Ala-Asp) box polypeptide DDX3X [Source:UniProtKB/TrEMBL;Acc:A0A125YSI6] | transcript_product=DEAD (Asp-Glu-Ala-Asp) box polypeptide DDX3X | location=TGGT1_chrX:1667417-1670378(+) | protein_length=734 | sequence_SO=chromosome | SO=protein_coding_gene | is_pseudo=false	0	FALSE	84.379	37	21	70	21	734	78.5	9.09	101.22	21	1.166	0.22	0.956982	1.56968e+07	1.83013e+07	11.33	6.54	2	2	1.70086e+07	1.44862e+07	1.91685e+07	1.74732e+07	1.60485e+07	1.44862e+07	1.6771e+07	1.0731e+07	21	19	19	21	High	High	High	High	1	Methylthio [C112; C273; C562]
TGGT1_248320	transcript=TGGT1_248320-t26_1 | gene=TGGT1_248320 | organism=Toxoplasma_gondii_GT1 | gene_product=Carrier superfamily protein [Source:UniProtKB/TrEMBL;Acc:S7WGM8] | transcript_product=carrier superfamily protein | location=TGGT1_chrXII:3739568-3740644(-) | protein_length=358 | sequence_SO=chromosome | SO=protein_coding_gene | is_pseudo=false	0.001	FALSE	4.506	3	1	1	1	358	38.9	9.55	2.68	1	1.163	0.22	0.956982	528797	615053	16.8	33.92	2	2	469316	595817	785516	481582	442825	595817	687267	295759	1	1	1	1	Peak Found	High	Peak Found	Peak Found	1
TGGT1_279350	transcript=TGGT1_279350-t26_1 | gene=TGGT1_279350 | organism=Toxoplasma_gondii_GT1 | gene_product=hypothetical protein | transcript_product=hypothetical protein | location=TGGT1_chrIX:82430-83419(-) | protein_length=329 | sequence_SO=chromosome | SO=protein_coding_gene | is_pseudo=false	0.021	FALSE	1.97	2	1	4	1	329	36.6	9.38	0	1	1.163	0.22	0.956982	484908	563946	33.36	39.57	2	2	616704	381278	751753	423057	581893	381278	657727	259817	1	1	1	1	High	High	High	High	1
TGGT1_211460	transcript=TGGT1_211460-t26_1 | gene=TGGT1_211460 | organism=Toxoplasma_gondii_GT1 | gene_product=hypothetical protein | transcript_product=hypothetical protein | location=TGGT1_chrIV:1626832-1629780(+) | protein_length=982 | sequence_SO=chromosome | SO=protein_coding_gene | is_pseudo=false	0.052	FALSE	1.618	1	1	1	1	982	105.6	5.26	0	1	1.163	0.22	0.956982	230068	267513	32.17	65.19	2	2	289998	182522	440415	162490	273628	182522	385329	99792	1	1	1	1	Peak Found	Peak Found	High	Peak Found	1
TGGT1_312090	transcript=TGGT1_312090-t26_1 | gene=TGGT1_312090 | organism=Toxoplasma_gondii_GT1 | gene_product=Ribosomal protein RPL23 [Source:UniProtKB/TrEMBL;Acc:A0A125YJR6] | transcript_product=ribosomal protein RPL23 | location=TGGT1_chrXI:2381590-2383685(-) | protein_length=139 | sequence_SO=chromosome | SO=protein_coding_gene | is_pseudo=false	0	FALSE	33.102	64	7	38	7	139	14.8	9.91	59.49	7	1.163	0.22	0.956982	5.31699e+07	6.18167e+07	3.8	24.42	2	2	5.46197e+07	5.17586e+07	7.35985e+07	5.1921e+07	5.15366e+07	5.17586e+07	6.4393e+07	3.18868e+07	7	7	7	7	High	High	High	High	1	Methylthio [C27; C28; C47; C54; C124]
TGGT1_226430	transcript=TGGT1_226430-t26_1 | gene=TGGT1_226430 | organism=Toxoplasma_gondii_GT1 | gene_product=Reticulon-like protein [Source:UniProtKB/TrEMBL;Acc:A0A125YHI4] | transcript_product=reticulon protein | location=TGGT1_chrX:1552488-1553078(-) | protein_length=196 | sequence_SO=chromosome | SO=protein_coding_gene | is_pseudo=false	0	FALSE	8.272	18	3	5	3	196	21.6	7.69	7.54	3	1.162	0.22	0.956982	1.93838e+06	2.25171e+06	47.2	29.09	2	2	2.74261e+06	1.36998e+06	2.77418e+06	1.82764e+06	2.5878e+06	1.36998e+06	2.4272e+06	1.12243e+06	3	3	3	3	High	Peak Found	High	High	1	Methylthio [C17]
TGGT1_294200	transcript=TGGT1_294200-t26_1 | gene=TGGT1_294200 | organism=Toxoplasma_gondii_GT1 | gene_product=Glucose-6-phosphate 1-dehydrogenase [Source:UniProtKB/TrEMBL;Acc:A0A125YWK6] | transcript_product=glucose-6-phosphate 1-dehydrogenase | location=TGGT1_chrIa:683542-690397(+) | protein_length=560 | sequence_SO=chromosome | SO=protein_coding_gene | is_pseudo=false	0	FALSE	49.126	34	14	41	14	560	62.7	7.61	48.25	14	1.161	0.22	0.956982	6.96286e+06	8.08638e+06	22.08	41.85	2	2	5.94863e+06	8.15003e+06	1.09709e+07	5.96028e+06	5.61285e+06	8.15003e+06	9.59868e+06	3.66046e+06	12	13	13	12	High	High	High	High	1	Methylthio [C153; C373]
TGGT1_242330	transcript=TGGT1_242330-t26_1 | gene=TGGT1_242330 | organism=Toxoplasma_gondii_GT1 | gene_product=Ribosomal_S7 domain-containing protein [Source:UniProtKB/TrEMBL;Acc:A0A125YNF8] | transcript_product=ribosomal protein RPS5 | location=TGGT1_chrVI:1882939-1884008(-) | protein_length=192 | sequence_SO=chromosome | SO=protein_coding_gene | is_pseudo=false	0	FALSE	25.701	46	9	27	9	192	21.6	9.74	41.2	9	1.161	0.22	0.956982	1.29139e+07	1.4996e+07	23.83	0.02	2	2	1.53087e+07	1.08937e+07	1.4998e+07	1.4994e+07	1.44446e+07	1.08937e+07	1.31221e+07	9.20846e+06	9	9	9	9	High	High	High	High	1	Methylthio [C34; C54; C160; C168]
TGGT1_288830	transcript=TGGT1_288830-t26_1 | gene=TGGT1_288830 | organism=Toxoplasma_gondii_GT1 | gene_product=Pyr_redox_2 domain-containing protein [Source:UniProtKB/TrEMBL;Acc:A0A125YU79] | transcript_product=NADH dehydrogenase (NDH2-II) | location=TGGT1_chrIX:2563874-2571485(+) | protein_length=657 | sequence_SO=chromosome | SO=protein_coding_gene | is_pseudo=false	0	FALSE	23.636	16	8	16	8	657	72.1	9.01	4.24	8	1.159	0.21	0.956982	2.12759e+06	2.46512e+06	32.23	32.99	2	2	2.68311e+06	1.68709e+06	3.12649e+06	1.94366e+06	2.53166e+06	1.68709e+06	2.73544e+06	1.19368e+06	7	6	7	6	High	High	High	High	1	Methylthio [C570]
TGGT1_313240	transcript=TGGT1_313240-t26_1 | gene=TGGT1_313240 | organism=Toxoplasma_gondii_GT1 | gene_product=Putative ethylene-responsive RNA helicase [Source:UniProtKB/TrEMBL;Acc:S7W881] | transcript_product=putative ethylene-responsive RNA helicase | location=TGGT1_chrXI:3172908-3178231(+) | protein_length=784 | sequence_SO=chromosome | SO=protein_coding_gene | is_pseudo=false	0.01	FALSE	2.224	1	1	9	1	784	85.5	8.92	3.81	1	1.158	0.21	0.956982	1.47423e+06	1.70747e+06	20.73	23.2	2	2	1.27186e+06	1.7088e+06	2.01491e+06	1.44694e+06	1200072	1.7088e+06	1.7629e+06	888626	1	1	1	1	High	High	High	High	1	Methylthio [C642]
TGGT1_251680	transcript=TGGT1_251680-t26_1 | gene=TGGT1_251680 | organism=Toxoplasma_gondii_GT1 | gene_product=TCTP domain-containing protein [Source:UniProtKB/TrEMBL;Acc:A0A125YGX3] | transcript_product=putative histamine-releasing factor | location=TGGT1_chrXII:5449838-5451669(-) | protein_length=171 | sequence_SO=chromosome | SO=protein_coding_gene | is_pseudo=false	0.001	FALSE	4.596	10	2	2	2	171	19.2	4.69	1.76	2	1.158	0.21	0.956982	1.48035e+07	1.7143e+07	29.39	54.06	2	2	1.19888e+07	1.8279e+07	1.14604e+07	2.56431e+07	1.13121e+07	1.8279e+07	1.0027e+07	1.57485e+07	2	2	2	2	Peak Found	Peak Found	Peak Found	High	1
TGGT1_306030	transcript=TGGT1_306030-t26_1 | gene=TGGT1_306030 | organism=Toxoplasma_gondii_GT1 | gene_product=Glutathione s-transferase, n-terminal domain containing protein [Source:UniProtKB/TrEMBL;Acc:A0A125YIG3] | transcript_product=glutathione s-transferase, n-terminal domain containing protein | location=TGGT1_chrIX:5538577-5544690(-) | protein_length=333 | sequence_SO=chromosome | SO=protein_coding_gen…	0	FALSE	25.685	26	7	20	7	333	37.8	9.38	14.53	7	1.158	0.21	0.956982	4.24234e+06	4.91113e+06	16.64	49.16	2	2	4.77455e+06	3.76946e+06	7.0583e+06	3.41714e+06	4.50504e+06	3.76946e+06	6.17547e+06	2.09861e+06	7	7	7	7	High	High	High	High	1	Methylthio [C127; C225]
TGGT1_408800	transcript=TGGT1_408800-t26_1 | gene=TGGT1_408800 | organism=Toxoplasma_gondii_GT1 | gene_product=NTPase [Source:UniProtKB/TrEMBL;Acc:S7UZL9] | transcript_product=NTPase | location=TGGT1_chrXII:6592331-6592894(+) | protein_length=188 | sequence_SO=chromosome | SO=protein_coding_gene | is_pseudo=false	0	FALSE	19.723	29	5	18	1	188	20.9	6.92	26.16	5	1.158	0.21	0.956982	1.01739e+06	1.17772e+06	51.09	55.09	2	2	1.48523e+06	696917	1.7768e+06	780631	1.4014e+06	696917	1.55456e+06	479418	1	1	1	1	High	High	High	High	1
TGGT1_263500	transcript=TGGT1_263500-t26_1 | gene=TGGT1_263500 | organism=Toxoplasma_gondii_GT1 | gene_product=Putative vacuolar protein sorting-associated protein 26 [Source:UniProtKB/TrEMBL;Acc:S7WDL4] | transcript_product=putative vacuolar protein sorting-associated protein 26 | location=TGGT1_chrVIIb:491007-496795(+) | protein_length=368 | sequence_SO=chromosome | SO=protein_coding_gene | is_pseudo=false	0.001	FALSE	4.367	5	2	3	2	368	42.2	6.04	1.6	2	1.157	0.21	0.956982	344728	398993	23.11	36.91	2	2	406534	292318	521194	305444	383587	292318	456005	187586	2	2	2	2	High	High	Peak Found	Peak Found	1
TGGT1_288630	transcript=TGGT1_288630-t26_1 | gene=TGGT1_288630 | organism=Toxoplasma_gondii_GT1 | gene_product=Putative nucleosome assembly protein (NAP) [Source:UniProtKB/TrEMBL;Acc:A0A125YGQ6] | transcript_product=putative nucleosome assembly protein (NAP) | location=TGGT1_chrIX:2455396-2456752(+) | protein_length=281 | sequence_SO=chromosome | SO=protein_coding_gene | is_pseudo=false	0	FALSE	9.732	15	5	6	5	281	32.1	4.42	1.78	5	1.157	0.21	0.956982	1.39977e+06	1.61991e+06	60.31	29.43	2	2	2.20756e+06	887570	1.31151e+06	2.00084e+06	2.08295e+06	887570	1.14747e+06	1.2288e+06	5	5	5	5	High	High	Peak Found	High	1	Methylthio [C65; C99]
TGGT1_313780	transcript=TGGT1_313780-t26_1 | gene=TGGT1_313780 | organism=Toxoplasma_gondii_GT1 | gene_product=hypothetical protein | transcript_product=hypothetical protein | location=TGGT1_chrXI:3653434-3654825(-) | protein_length=463 | sequence_SO=chromosome | SO=protein_coding_gene | is_pseudo=false	0.001	FALSE	3.773	3	1	5	1	463	47.3	7.59	8.53	1	1.157	0.21	0.956982	764285	884369	37.29	44.4	2	2	583409	1.00124e+06	639037	1.22389e+06	550477	1.00124e+06	559108	751640	1	1	1	1	High	High	High	High	1	Methylthio [C458; C461]
TGGT1_292130	transcript=TGGT1_292130-t26_1 | gene=TGGT1_292130 | organism=Toxoplasma_gondii_GT1 | gene_product=Ribosomal protein RPL13A [Source:UniProtKB/TrEMBL;Acc:A0A125YU05] | transcript_product=ribosomal protein RPL13A | location=TGGT1_chrIX:4373947-4376715(-) | protein_length=286 | sequence_SO=chromosome | SO=protein_coding_gene | is_pseudo=false	0	FALSE	38.926	33	8	45	8	286	32.7	10.65	72.96	8	1.157	0.21	0.956982	4.09304e+07	4.73364e+07	22.05	55.99	2	2	4.78991e+07	3.49755e+07	7.19575e+07	3.11397e+07	4.51953e+07	3.49755e+07	6.29573e+07	1.91242e+07	8	8	8	8	High	High	High	High	1	Methylthio [C94; C118; C121]
TGGT1_300060	transcript=TGGT1_300060-t26_1 | gene=TGGT1_300060 | organism=Toxoplasma_gondii_GT1 | gene_product=Signal peptidase subunit protein [Source:UniProtKB/TrEMBL;Acc:A0A125YZH3] | transcript_product=signal peptidase subunit protein | location=TGGT1_chrXII:194988-195928(-) | protein_length=175 | sequence_SO=chromosome | SO=protein_coding_gene | is_pseudo=false	0.001	FALSE	4.337	15	2	4	2	175	19.5	6.3	3.56	2	1.156	0.21	0.956982	409031	472989	43.21	34.63	2	2	560811	298330	607305	368379	529155	298330	531345	226237	2	2	2	2	High	Peak Found	High	High	1
TGGT1_261010	transcript=TGGT1_261010-t26_1 | gene=TGGT1_261010 | organism=Toxoplasma_gondii_GT1 | gene_product=AAA domain-containing protein [Source:UniProtKB/TrEMBL;Acc:A0A125YT32] | transcript_product=putative tat-binding family protein | location=TGGT1_chrVIIb:1947162-1952503(-) | protein_length=409 | sequence_SO=chromosome | SO=protein_coding_gene | is_pseudo=false	0	FALSE	7.086	7	3	6	2	409	46	7.77	3.8	3	1.156	0.21	0.956982	121138	140034	45.11	32.97	2	2	168578	87047.9	177571	110432	159062	87047.9	155361	67821.2	1	1	1	1	High	High	High	Peak Found	1
TGGT1_203630	transcript=TGGT1_203630-t26_1 | gene=TGGT1_203630 | organism=Toxoplasma_gondii_GT1 | gene_product=Ribosomal protein RPL44 [Source:UniProtKB/TrEMBL;Acc:A0A125YNY0] | transcript_product=ribosomal protein RPL44 | location=TGGT1_chrVIIa:2292915-2293974(-) | protein_length=105 | sequence_SO=chromosome | SO=protein_coding_gene | is_pseudo=false	0.007	FALSE	2.519	8	1	6	1	105	12.1	10.56	8.33	1	1.156	0.21	0.956982	7.07359e+06	8.17455e+06	8.61	21.74	2	2	6.65534e+06	7518127	9.54493e+06	7.00091e+06	6279672	7518127	8.35108e+06	4.29955e+06	1	1	1	1	High	High	High	High	1
TGGT1_235930	transcript=TGGT1_235930-t26_1 | gene=TGGT1_235930 | organism=Toxoplasma_gondii_GT1 | gene_product=Domain K-type RNA binding proteins family protein [Source:UniProtKB/TrEMBL;Acc:A0A125YQ53] | transcript_product=domain K- type RNA binding proteins family protein | location=TGGT1_chrX:5075263-5081044(+) | protein_length=570 | sequence_SO=chromosome | SO=protein_coding_gene | is_pseudo=false	0.001	FALSE	4.45	3	2	5	2	570	64.2	9.94	3.72	2	1.156	0.21	0.956982	535647	619002	46.12	1.66	2	2	751441	381824	611799	626289	709025	381824	535277	384630	2	2	2	2	High	Peak Found	High	High	1
TGGT1_240860	transcript=TGGT1_240860-t26_1 | gene=TGGT1_240860 | organism=Toxoplasma_gondii_GT1 | gene_product=PlsC domain-containing protein [Source:UniProtKB/TrEMBL;Acc:A0A125YWP8] | transcript_product=acyltransferase domain-containing protein | location=TGGT1_chrVI:1452612-1456058(-) | protein_length=281 | sequence_SO=chromosome | SO=protein_coding_gene | is_pseudo=false	0	FALSE	16.064	20	4	13	4	281	31.8	8.85	11.44	4	1.154	0.21	0.957758	2.35688e+06	2.71876e+06	44.69	39.69	2	2	3.26912e+06	1.6992e+06	3.62759e+06	2.03763e+06	3.08459e+06	1.6992e+06	3.17387e+06	1.25139e+06	4	4	4	4	High	High	High	High	1
TGGT1_263180	transcript=TGGT1_263180-t26_1 | gene=TGGT1_263180 | organism=Toxoplasma_gondii_GT1 | gene_product=Myosin motor domain-containing protein [Source:UniProtKB/TrEMBL;Acc:A0A125YIS7] | transcript_product=myosin D | location=TGGT1_chrVIIb:714013-721737(-) | protein_length=822 | sequence_SO=chromosome | SO=protein_coding_gene | is_pseudo=false	0.056	FALSE	1.571	1	1	1	1	822	91	8.34	0	1	1.153	0.21	0.957758	183057	211121	58.84	14.19	2	2	285054	117557	233480	190904	268964	117557	204277	117242	1	1	1	1	High	Peak Found	Peak Found	Peak Found	1
TGGT1_218760	transcript=TGGT1_218760-t26_1 | gene=TGGT1_218760 | organism=Toxoplasma_gondii_GT1 | gene_product=Putative SNAP protein (Soluble N-ethylmaleimide-sensitive factor Attachment Protein) [Source:UniProtKB/TrEMBL;Acc:A0A125YYE8] | transcript_product=putative SNAP protein (soluble N-ethylmaleimide-sensitive factor Attachment Protein) | location=TGGT1_chrXII:1264192-1267346(+) | protein_length=329 | seq…	0.001	FALSE	4.774	5	1	1	1	329	35.8	5.07	0	1	1.151	0.2	0.957758	89188.3	102632	32.64	7.2	2	2	112821	70506	97534.2	107997	106453	70506	85335	66325.2	1	1	1	1	High	Peak Found	Peak Found	Peak Found	1
TGGT1_309760	transcript=TGGT1_309760-t26_1 | gene=TGGT1_309760 | organism=Toxoplasma_gondii_GT1 | gene_product=hypothetical protein | transcript_product=hypothetical protein | location=TGGT1_chrXI:754191-755138(-) | protein_length=315 | sequence_SO=chromosome | SO=protein_coding_gene | is_pseudo=false	0	FALSE	17.331	22	5	12	5	315	34.5	9.64	8.22	5	1.149	0.2	0.957758	1.08081e+06	1.24221e+06	52.25	87.8	2	2	1.59283e+06	733376	2.56839e+06	600793	1.50292e+06	733376	2.24715e+06	368972	4	4	5	4	High	High	High	High	1	Methylthio [C210]
TGGT1_313080	transcript=TGGT1_313080-t26_1 | gene=TGGT1_313080 | organism=Toxoplasma_gondii_GT1 | gene_product=hypothetical protein | transcript_product=hypothetical protein | location=TGGT1_chrXI:3049384-3050751(-) | protein_length=455 | sequence_SO=chromosome | SO=protein_coding_gene | is_pseudo=false	0.001	FALSE	3.734	4	1	1	1	455	49.5	8.69	0	1	1.148	0.2	0.957758	149234	171280	49.66	21.63	2	2	215353	103416	146810	199829	203197	103416	128447	122723	1	1	1	1	High	Peak Found	Peak Found	Peak Found	1
TGGT1_257340	transcript=TGGT1_257340-t26_1 | gene=TGGT1_257340 | organism=Toxoplasma_gondii_GT1 | gene_product=Ras family protein [Source:UniProtKB/TrEMBL;Acc:A0A125YZS8] | transcript_product=Ras family protein | location=TGGT1_chrVIIb:4052097-4056284(+) | protein_length=214 | sequence_SO=chromosome | SO=protein_coding_gene | is_pseudo=false	0	FALSE	9.872	17	3	8	2	214	23.6	8.15	11.75	3	1.148	0.2	0.957758	611873	702162	3.59	25	2	2	627607	596532	839513	587283	592181	596532	734510	360675	2	2	2	2	High	High	High	Peak Found	1
TGGT1_214210	transcript=TGGT1_214210-t26_1 | gene=TGGT1_214210 | organism=Toxoplasma_gondii_GT1 | gene_product=PUA domain-containing protein [Source:UniProtKB/TrEMBL;Acc:A0A125YRK0] | transcript_product=rRNA pseudouridine synthase | location=TGGT1_chrX:6002905-6008379(-) | protein_length=505 | sequence_SO=chromosome | SO=protein_coding_gene | is_pseudo=false	0	FALSE	11.385	7	3	12	3	505	56.7	9	4.41	3	1.145	0.2	0.960885	2.53177e+06	2.89901e+06	13.35	44.77	2	2	2.78324e+06	2.30302e+06	4.02357e+06	2.08876e+06	2626132	2.30302e+06	3520313	1.28279e+06	3	3	3	3	High	High	High	High	1
TGGT1_236650	transcript=TGGT1_236650-t26_1 | gene=TGGT1_236650 | organism=Toxoplasma_gondii_GT1 | gene_product=DEAD (Asp-Glu-Ala-Asp) box polypeptide 17 [Source:UniProtKB/TrEMBL;Acc:A0A125YWJ5] | transcript_product=DEAD (Asp-Glu-Ala-Asp) box polypeptide 17 | location=TGGT1_chrX:5362273-5365892(-) | protein_length=550 | sequence_SO=chromosome | SO=protein_coding_gene | is_pseudo=false	0	FALSE	82.382	43	19	87	19	550	59.9	8.94	131.51	19	1.143	0.19	0.960885	3.53432e+07	4.03856e+07	24.61	36.78	2	2	4.21372e+07	2.96446e+07	5.27027e+07	3.09471e+07	3.97587e+07	2.96446e+07	4.61109e+07	1.90059e+07	19	20	19	19	High	High	High	High	1	Methylthio [C256; C259; C346; C474]
TGGT1_266640	transcript=TGGT1_266640-t26_1 | gene=TGGT1_266640 | organism=Toxoplasma_gondii_GT1 | gene_product=Acetyl-coenzyme A synthetase [Source:UniProtKB/TrEMBL;Acc:S7UHB7] | transcript_product=putative Acetyl-coenzyme A synthetase 2 | location=TGGT1_chrIX:887254-895827(+) | protein_length=714 | sequence_SO=chromosome | SO=protein_coding_gene | is_pseudo=false	0	FALSE	21.24	14	8	14	8	714	79.9	6.89	8.93	8	1.142	0.19	0.960885	5.43208e+06	6.20452e+06	30.3	43.66	2	2	6.75296e+06	4.36957e+06	8.53716e+06	4.50923e+06	6.37178e+06	4.36957e+06	7.46936e+06	2.76931e+06	6	6	7	6	High	High	High	High	1
TGGT1_275802	transcript=TGGT1_275802-t26_1 | gene=TGGT1_275802 | organism=Toxoplasma_gondii_GT1 | gene_product=SRP72 domain-containing protein [Source:UniProtKB/TrEMBL;Acc:S7UNG8] | transcript_product=SRP72 RNA-binding domain-containing protein | location=TGGT1_chrIII:207327-214479(-) | protein_length=731 | sequence_SO=chromosome | SO=protein_coding_gene | is_pseudo=false	0	FALSE	21.398	9	7	10	7	731	79.9	8.24	7.91	7	1.142	0.19	0.960885	2.15665e+06	2.46198e+06	32.47	63.81	2	2	2.72464e+06	1.70707e+06	4.00338e+06	1.51406e+06	2.57085e+06	1.70707e+06	3.50265e+06	929848	7	7	7	6	High	High	High	High	1	Methylthio [C331; C475; C617]
TGGT1_273520	transcript=TGGT1_273520-t26_1 | gene=TGGT1_273520 | organism=Toxoplasma_gondii_GT1 | gene_product=Eukaryotic translation initiation factor 3 subunit E [Source:UniProtKB/TrEMBL;Acc:A0A125YQR1] | transcript_product=PCI domain-containing protein | location=TGGT1_chrVIII:3416534-3423842(+) | protein_length=601 | sequence_SO=chromosome | SO=protein_coding_gene | is_pseudo=false	0	FALSE	22.61	15	7	13	7	601	67.3	6.73	9.11	7	1.141	0.19	0.960885	7.16155e+06	8.17057e+06	36.25	50.87	2	2	9.30848e+06	5.5098e+06	1.19068e+07	5.60673e+06	8.78305e+06	5.5098e+06	1.04175e+07	3.44333e+06	7	7	7	7	High	High	High	High	1
TGGT1_216590	transcript=TGGT1_216590-t26_1 | gene=TGGT1_216590 | organism=Toxoplasma_gondii_GT1 | gene_product=Importin N-terminal domain-containing protein [Source:UniProtKB/TrEMBL;Acc:S7UM02] | transcript_product=HEAT repeat-containing protein | location=TGGT1_chrXI:5982217-5988765(-) | protein_length=1010 | sequence_SO=chromosome | SO=protein_coding_gene | is_pseudo=false	0.022	FALSE	2.005	1	1	2	1	1010	111.1	5.14	0	1	1.14	0.19	0.960885	81764.8	93209.4	52.28	34.45	2	2	120532	55466.5	119513	72695.1	113728	55466.5	104565	44645.1	1	1	1	1	High	Peak Found	High	Peak Found	1
TGGT1_227030	transcript=TGGT1_227030-t26_1 | gene=TGGT1_227030 | organism=Toxoplasma_gondii_GT1 | gene_product=hypothetical protein | transcript_product=hypothetical protein | location=TGGT1_chrX:1036138-1037712(+) | protein_length=170 | sequence_SO=chromosome | SO=protein_coding_gene | is_pseudo=false	0	FALSE	6.24	15	3	8	3	170	18.7	8.07	1.65	3	1.137	0.19	0.960885	1.51294e+06	1.72089e+06	14.75	35.31	2	2	1.67985e+06	1.36261e+06	2.22085e+06	1.33347e+06	1.58503e+06	1.36261e+06	1.94308e+06	818941	3	3	3	3	High	High	High	High	1	Methylthio [C82]
TGGT1_225150	transcript=TGGT1_225150-t26_1 | gene=TGGT1_225150 | organism=Toxoplasma_gondii_GT1 | gene_product=hypothetical protein | transcript_product=hypothetical protein | location=TGGT1_chrX:2357556-2361015(+) | protein_length=691 | sequence_SO=chromosome | SO=protein_coding_gene | is_pseudo=false	0.032	FALSE	1.801	1	1	1	1	691	76.8	9.47	0	1	1.137	0.19	0.960885	377077	428753	11.89	43.84	2	2	410229	346605	590787	311159	387073	346605	516893	191096	1	1	1	1	Peak Found	Peak Found	High	Peak Found	1
TGGT1_410360	transcript=TGGT1_410360-t26_1 | gene=TGGT1_410360 | organism=Toxoplasma_gondii_GT1 | gene_product=Putative transmembrane protein [Source:UniProtKB/TrEMBL;Acc:S7ULN4] | transcript_product=putative transmembrane protein | location=TGGT1_chrII:71310-72374(+) | protein_length=354 | sequence_SO=chromosome | SO=protein_coding_gene | is_pseudo=false	0	FALSE	68.084	40	12	59	4	354	38.1	6.11	88.81	12	1.136	0.18	0.960885	8.55803e+06	9.72321e+06	13.48	66.2	2	2	9.41682e+06	7.77756e+06	1.61533e+07	5.8527e+06	8.88528e+06	7.77756e+06	1.41329e+07	3.59439e+06	3	4	4	4	High	High	High	High	1
TGGT1_321680	transcript=TGGT1_321680-t26_1 | gene=TGGT1_321680 | organism=Toxoplasma_gondii_GT1 | gene_product=HABP4_PAI-RBP1 domain-containing protein [Source:UniProtKB/TrEMBL;Acc:A0A125YT80] | transcript_product=hypothetical protein | location=TGGT1_chrIb:1645852-1649258(-) | protein_length=372 | sequence_SO=chromosome | SO=protein_coding_gene | is_pseudo=false	0	FALSE	21.855	21	6	8	6	372	40.7	6.16	4.56	6	1.135	0.18	0.960885	7.55952e+06	8.57853e+06	6.98	29.89	2	2	7.19512e+06	7.94238e+06	6.92163e+06	1.0632e+07	6.78898e+06	7.94238e+06	6.0559e+06	6.52958e+06	4	5	3	6	Peak Found	High	Peak Found	High	1
TGGT1_216650	transcript=TGGT1_216650-t26_1 | gene=TGGT1_216650 | organism=Toxoplasma_gondii_GT1 | gene_product=S15 sporozoite-expressed protein [Source:UniProtKB/TrEMBL;Acc:S7UKW3] | transcript_product=S15 sporozoite-expressed protein | location=TGGT1_chrXI:5902644-5904672(-) | protein_length=400 | sequence_SO=chromosome | SO=protein_coding_gene | is_pseudo=false	0	FALSE	5.626	6	2	4	2	400	45.1	7.28	0	2	1.134	0.18	0.960885	294767	334327	106.61	85.05	2	2	786843	110425	166791	670148	742428	110425	145929	411566	2	1	1	2	High	Peak Found	High	High	1
TGGT1_313410	transcript=TGGT1_313410-t26_1 | gene=TGGT1_313410 | organism=Toxoplasma_gondii_GT1 | gene_product=Proteasome 26S regulatory subunit [Source:UniProtKB/TrEMBL;Acc:S7W860] | transcript_product=proteasome 26S regulatory subunit | location=TGGT1_chrXI:3312986-3323185(+) | protein_length=1091 | sequence_SO=chromosome | SO=protein_coding_gene | is_pseudo=false	0	FALSE	6.222	2	2	3	2	1091	117.6	5.1	0	2	1.134	0.18	0.960885	192750	218593	69.1	44.76	2	2	328855	112975	303380	157502	310293	112975	265434	96728.6	2	2	2	2	High	Peak Found	High	Peak Found	1
TGGT1_227600	transcript=TGGT1_227600-t26_1 | gene=TGGT1_227600 | organism=Toxoplasma_gondii_GT1 | gene_product=Ribosomal protein RPL34 [Source:UniProtKB/TrEMBL;Acc:A0A125YXF2] | transcript_product=ribosomal protein RPL34 | location=TGGT1_chrX:803568-805820(-) | protein_length=134 | sequence_SO=chromosome | SO=protein_coding_gene | is_pseudo=false	0	FALSE	8.513	21	3	10	3	134	15.4	11.18	13.39	3	1.132	0.18	0.960885	5.36648e+06	6.07528e+06	8.19	40.42	2	2	5.68685e+06	5.06416e+06	8.1517e+06	4.52777e+06	5.36585e+06	5.06416e+06	7.13211e+06	2.78069e+06	3	3	3	3	High	High	High	High	1
TGGT1_209910	transcript=TGGT1_209910-t26_1 | gene=TGGT1_209910 | organism=Toxoplasma_gondii_GT1 | gene_product=Histone H2B [Source:UniProtKB/TrEMBL;Acc:A0A125YMF4] | transcript_product=histone H2Bv | location=TGGT1_chrIb:1562803-1563174(+) | protein_length=123 | sequence_SO=chromosome | SO=protein_coding_gene | is_pseudo=false	0	FALSE	5.898	20	2	6	2	123	13.7	10.55	0	2	1.131	0.18	0.962013	3.81953e+06	4.31925e+06	80.55	35.81	2	2	7.29381e+06	2.00016e+06	3.33433e+06	5.59509e+06	6.8821e+06	2.00016e+06	2.91728e+06	3.43618e+06	2	2	2	2	High	High	High	High	1
TGGT1_236040	transcript=TGGT1_236040-t26_1 | gene=TGGT1_236040 | organism=Toxoplasma_gondii_GT1 | gene_product=Fructose-bisphosphate aldolase [Source:UniProtKB/TrEMBL;Acc:A0A125YGE5] | transcript_product=fructose-1,6-bisphosphate aldolase | location=TGGT1_chrX:5139351-5141389(+) | protein_length=433 | sequence_SO=chromosome | SO=protein_coding_gene | is_pseudo=false	0	FALSE	37.818	28	11	36	11	433	46.9	8.82	50.61	11	1.13	0.18	0.962013	1.03561e+07	1.16978e+07	21.78	41.35	2	2	8.86689e+06	1.20953e+07	8.65581e+06	1.5809e+07	8.36639e+06	1.20953e+07	7.57317e+06	9.70896e+06	11	11	11	11	High	High	High	High	1	Methylthio [C249; C380]
TGGT1_313140	transcript=TGGT1_313140-t26_1 | gene=TGGT1_313140 | organism=Toxoplasma_gondii_GT1 | gene_product=Iso_dh domain-containing protein [Source:UniProtKB/TrEMBL;Acc:S7W894] | transcript_product=isocitrate dehydrogenase | location=TGGT1_chrXI:3095680-3101525(-) | protein_length=621 | sequence_SO=chromosome | SO=protein_coding_gene | is_pseudo=false	0	FALSE	8.968	6	3	5	3	621	68.3	8.59	3.91	3	1.129	0.18	0.962013	550475	621610	76.61	20.72	2	2	1.00964e+06	300131	536316	720469	952647	300131	469236	442470	3	3	3	3	High	High	High	Peak Found	1	Methylthio [C549]
TGGT1_217890	transcript=TGGT1_217890-t26_1 | gene=TGGT1_217890 | organism=Toxoplasma_gondii_GT1 | gene_product=Peroxiredoxin [Source:UniProtKB/TrEMBL;Acc:A0A125YNG7] | transcript_product=putative alkyl hydroperoxide reductase/ Thiol specific antioxidant/ Mal allergen | location=TGGT1_chrXII:2143499-2144089(-) | protein_length=196 | sequence_SO=chromosome | SO=protein_coding_gene | is_pseudo=false	0	FALSE	17.911	28	4	18	4	196	21.7	6.87	32.23	4	1.128	0.17	0.962013	4.25485e+06	4.79904e+06	37.19	14.49	2	2	5.56976e+06	3.25036e+06	4.32998e+06	5.31892e+06	5.25536e+06	3.25036e+06	3.7884e+06	3.26657e+06	4	4	4	4	High	High	High	High	1	Methylthio [C171]
TGGT1_211040	transcript=TGGT1_211040-t26_1 | gene=TGGT1_211040 | organism=Toxoplasma_gondii_GT1 | gene_product=Protein transport protein Sec61 subunit beta [Source:UniProtKB/TrEMBL;Acc:A0A125YP58] | transcript_product=Sec61beta family protein | location=TGGT1_chrIV:1885778-1887505(+) | protein_length=99 | sequence_SO=chromosome | SO=protein_coding_gene | is_pseudo=false	0	FALSE	9.14	35	3	10	3	99	10.1	10.87	5.38	3	1.128	0.17	0.962013	2.49087e+06	2.80847e+06	53.04	13.36	2	2	3.69484e+06	1.67922e+06	3.08761e+06	2.55458e+06	3.48628e+06	1.67922e+06	2.70142e+06	1.56887e+06	2	1	2	2	High	High	High	High	1
TGGT1_257300	transcript=TGGT1_257300-t26_1 | gene=TGGT1_257300 | organism=Toxoplasma_gondii_GT1 | gene_product=hypothetical protein | transcript_product=hypothetical protein | location=TGGT1_chrVIIb:4070107-4078962(+) | protein_length=1152 | sequence_SO=chromosome | SO=protein_coding_gene | is_pseudo=false	0	FALSE	27.667	9	7	18	7	1152	121.8	9.54	10.98	7	1.127	0.17	0.962013	2.32954e+06	2.62553e+06	29.11	9.02	2	2	1.89051e+06	2.87054e+06	2.46303e+06	2.79874e+06	1.78379e+06	2.87054e+06	2.15497e+06	1.71882e+06	7	7	7	7	High	High	High	High	1	Methylthio [C506]
TGGT1_238040A	transcript=TGGT1_238040A-t26_1 | gene=TGGT1_238040A | organism=Toxoplasma_gondii_GT1 | gene_product=Protein disulfide-isomerase domain-containing protein [Source:UniProtKB/TrEMBL;Acc:S7W691] | transcript_product=protein disulfide-isomerase domain-containing protein | location=TGGT1_chrVI:19741-27980(-) | protein_length=1139 | sequence_SO=chromosome | SO=protein_coding_gene | is_pseudo=false	0	FALSE	11.992	3	3	4	3	1139	126.1	8.68	2.22	3	1.126	0.17	0.962013	553802	623812	63.26	52.86	2	2	342226	896181	923938	421177	322909	896181	808375	258662	3	3	3	2	Peak Found	High	High	Peak Found	1
TGGT1_305750	transcript=TGGT1_305750-t26_1 | gene=TGGT1_305750 | organism=Toxoplasma_gondii_GT1 | gene_product=Nucleolar GTP-binding protein 2 [Source:UniProtKB/TrEMBL;Acc:S7UI53] | transcript_product=putative nucleolar gtp-binding protein 2 | location=TGGT1_chrIX:5323820-5332283(+) | protein_length=641 | sequence_SO=chromosome | SO=protein_coding_gene | is_pseudo=false	0.052	FALSE	1.615	2	1	1	1	641	71	9.51	0	1	1.126	0.17	0.962013	1.07973e+06	1.21594e+06	7.68	36.08	2	2	1.02264e+06	1.14001e+06	1.57842e+06	936699	964916	1.14001e+06	1.381e+06	575266	1	1	1	1	Peak Found	Peak Found	Peak Found	High	1
TGGT1_217360	transcript=TGGT1_217360-t26_1 | gene=TGGT1_217360 | organism=Toxoplasma_gondii_GT1 | gene_product=hypothetical protein | transcript_product=hypothetical protein | location=TGGT1_chrXII:1715649-1723920(+) | protein_length=2084 | sequence_SO=chromosome | SO=protein_coding_gene | is_pseudo=false	0.015	FALSE	2.132	0	1	1	1	2084	232	7.97	0	1	1.123	0.17	0.966838	1.98546e+06	2.23036e+06	5.94	26.69	2	2	1.90377e+06	2.07066e+06	1.84258e+06	2.69974e+06	1.79631e+06	2.07066e+06	1.61212e+06	1.65802e+06	1	1	1	1	Peak Found	Peak Found	Peak Found	High	1
TGGT1_271970	transcript=TGGT1_271970-t26_1 | gene=TGGT1_271970 | organism=Toxoplasma_gondii_GT1 | gene_product=Glideosome-associated protein with multiple-membrane spans GAPM3 [Source:UniProtKB/TrEMBL;Acc:A0A125YP90] | transcript_product=glideosome-associated protein with multiple-membrane spans GAPM3 | location=TGGT1_chrVIII:4254025-4255814(+) | protein_length=310 | sequence_SO=chromosome | SO=protein_coding…	0	FALSE	27.164	19	4	49	4	310	34.3	4.96	52.75	4	1.122	0.17	0.966838	1.83736e+08	2.06175e+08	18.77	11.79	2	2	2.09974e+08	1.60776e+08	2.24142e+08	1.89647e+08	1.98122e+08	1.60776e+08	1.96107e+08	1.1647e+08	6	6	6	6	High	High	High	High	1	Phospho [T285; T292; S296]
TGGT1_230380	transcript=TGGT1_230380-t26_1 | gene=TGGT1_230380 | organism=Toxoplasma_gondii_GT1 | gene_product=Protein translocation complex, SEC61 gamma subunit [Source:UniProtKB/TrEMBL;Acc:S7WB99] | transcript_product=protein translocation complex, SEC61 gamma subunit | location=TGGT1_chrVIII:734700-735864(-) | protein_length=149 | sequence_SO=chromosome | SO=protein_coding_gene | is_pseudo=false	0.039	FALSE	1.739	5	1	2	1	149	16.8	10.58	0	1	1.12	0.16	0.971958	271787	304467	NA	13.25	1	2	271787	NA	277154	334471	256446	NA	242488	205413	1	NA	1	1	High	Not Found	Peak Found	High	1
TGGT1_319560	transcript=TGGT1_319560-t26_1 | gene=TGGT1_319560 | organism=Toxoplasma_gondii_GT1 | gene_product=EGF-like domain-containing protein [Source:UniProtKB/TrEMBL;Acc:S7VSV0] | transcript_product=microneme protein MIC3 | location=TGGT1_chrIV:856315-857588(+) | protein_length=383 | sequence_SO=chromosome | SO=protein_coding_gene | is_pseudo=false	0	FALSE	74.498	49	13	251	13	383	40.5	6.64	215.44	13	1.119	0.16	0.972386	2.72158e+08	3.04606e+08	23.16	22.62	2	2	3.21067e+08	2.307e+08	2.59214e+08	3.57946e+08	3.02944e+08	2.307e+08	2.26792e+08	2.1983e+08	13	13	13	13	High	High	High	High	1	Methylthio [C102; C145; C147; C160; C172; C185; C190; C249; C261; C263; C279; C302; C304; C339; C354]
TGGT1_218280	transcript=TGGT1_218280-t26_1 | gene=TGGT1_218280 | organism=Toxoplasma_gondii_GT1 | gene_product=Putative eukaryotic porin [Source:UniProtKB/TrEMBL;Acc:S7V1F0] | transcript_product=putative eukaryotic porin | location=TGGT1_chrXII:1568398-1573590(+) | protein_length=466 | sequence_SO=chromosome | SO=protein_coding_gene | is_pseudo=false	0	FALSE	7.94	8	3	8	3	466	50.5	6.35	1.66	3	1.115	0.16	0.978807	761960	849878	25.1	27.95	2	2	911638	636856	1.03833e+06	695629	860179	636856	908459	427215	3	3	3	3	High	High	High	High	1
TGGT1_291330	transcript=TGGT1_291330-t26_1 | gene=TGGT1_291330 | organism=Toxoplasma_gondii_GT1 | gene_product=RRM domain-containing protein [Source:UniProtKB/TrEMBL;Acc:A0A125YM75] | transcript_product=RNA recognition motif-containing protein | location=TGGT1_chrIX:4055101-4057671(+) | protein_length=228 | sequence_SO=chromosome | SO=protein_coding_gene | is_pseudo=false	0	FALSE	9.2	16	3	4	3	228	25.5	10.51	3.61	3	1.114	0.16	0.978807	534982	595795	44.45	28.08	2	2	740657	386421	728588	487205	698850	386421	637458	299213	3	3	3	3	High	Peak Found	Peak Found	High	1
TGGT1_314970	transcript=TGGT1_314970-t26_1 | gene=TGGT1_314970 | organism=Toxoplasma_gondii_GT1 | gene_product=Protein SEY1 homolog [Source:UniProtKB/TrEMBL;Acc:S7ULG7] | transcript_product=root hair defective 3 gtp-binding protein (rhd3) protein | location=TGGT1_chrXI:4386163-4399801(-) | protein_length=893 | sequence_SO=chromosome | SO=protein_coding_gene | is_pseudo=false	0	FALSE	8.353	5	3	5	3	893	98	5.88	7.93	3	1.114	0.16	0.978807	555259	618375	15.69	2.57	2	2	496727	620688	607249	629706	468688	620688	531296	386728	2	3	2	3	High	High	High	Peak Found	1	Methylthio [C541]
TGGT1_266990	transcript=TGGT1_266990-t26_1 | gene=TGGT1_266990 | organism=Toxoplasma_gondii_GT1 | gene_product=Coatomer subunit beta [Source:UniProtKB/TrEMBL;Acc:S7UHC3] | transcript_product=beta-COP | location=TGGT1_chrIX:687782-698362(+) | protein_length=1103 | sequence_SO=chromosome | SO=protein_coding_gene | is_pseudo=false	0	FALSE	17.531	6	5	13	5	1103	121.9	6.61	5.16	5	1.113	0.15	0.978807	764892	851563	21.59	33.07	2	2	892129	655802	1.08066e+06	671031	841772	655802	945499	412108	4	4	4	4	High	High	High	High	1
TGGT1_208790	transcript=TGGT1_208790-t26_1 | gene=TGGT1_208790 | organism=Toxoplasma_gondii_GT1 | gene_product=Putative MC family transporter [Source:UniProtKB/TrEMBL;Acc:A0A125YLN1] | transcript_product=putative MC family transporter | location=TGGT1_chrIb:876872-880126(-) | protein_length=310 | sequence_SO=chromosome | SO=protein_coding_gene | is_pseudo=false	0	FALSE	5.697	6	2	5	2	310	33.6	9.92	1.72	2	1.113	0.15	0.978807	482807	537227	31.71	31.35	2	2	606522	384326	673072	428799	572287	384326	588887	263343	2	2	2	2	High	High	High	Peak Found	1
TGGT1_304710	transcript=TGGT1_304710-t26_1 | gene=TGGT1_304710 | organism=Toxoplasma_gondii_GT1 | gene_product=eRF1_1 domain-containing protein [Source:UniProtKB/TrEMBL;Acc:S7UUD7] | transcript_product=putative eukaryotic peptide chain release factor | location=TGGT1_chrVIIa:615815-622350(-) | protein_length=814 | sequence_SO=chromosome | SO=protein_coding_gene | is_pseudo=false	0	FALSE	13.874	6	5	12	5	814	90	8.88	4.93	5	1.113	0.15	0.978807	2.96639e+06	3.30057e+06	18.39	30.56	2	2	3.38092e+06	2.60269e+06	4.11082e+06	2.65002e+06	3.19008e+06	2.60269e+06	3.59665e+06	1.62749e+06	5	5	5	5	High	High	High	High	1
TGGT1_264610	transcript=TGGT1_264610-t26_1 | gene=TGGT1_264610 | organism=Toxoplasma_gondii_GT1 | gene_product=RNA recognition motif-containing protein [Source:UniProtKB/TrEMBL;Acc:A0A125YIU3] | transcript_product=RNA recognition motif-containing protein | location=TGGT1_chrIX:1992388-1998489(-) | protein_length=430 | sequence_SO=chromosome | SO=protein_coding_gene | is_pseudo=false	0	FALSE	11.019	9	3	6	3	430	45	5.16	4.67	3	1.112	0.15	0.978807	703632	782256	67.35	10.4	2	2	1.18128e+06	419119	726704	842054	1.1146e+06	419119	635811	517141	3	3	3	3	High	Peak Found	High	High	1
TGGT1_249030	transcript=TGGT1_249030-t26_1 | gene=TGGT1_249030 | organism=Toxoplasma_gondii_GT1 | gene_product=Endo/exonuclease/phosphatase domain-containing protein [Source:UniProtKB/TrEMBL;Acc:S7W971] | transcript_product=endonuclease/exonuclease/phosphatase family protein | location=TGGT1_chrXII:4253966-4255780(-) | protein_length=541 | sequence_SO=chromosome | SO=protein_coding_gene | is_pseudo=false	0.039	FALSE	1.733	1	1	3	1	541	60.2	8.02	0	1	1.11	0.15	0.978807	182849	202889	21.31	4.92	2	2	212832	157090	195953	210070	200819	157090	171444	129013	1	1	1	1	High	High	High	Peak Found	1
TGGT1_235160	transcript=TGGT1_235160-t26_1 | gene=TGGT1_235160 | organism=Toxoplasma_gondii_GT1 | gene_product=hypothetical protein | transcript_product=hypothetical protein | location=TGGT1_chrX:4553113-4566152(-) | protein_length=1545 | sequence_SO=chromosome | SO=protein_coding_gene | is_pseudo=false	0.001	FALSE	4.266	1	2	3	2	1545	168	6.28	0	2	1.109	0.15	0.978807	341097	378316	41.38	51.13	2	2	461071	252341	552455	259067	435046	252341	483356	159104	2	2	2	2	High	Peak Found	High	Peak Found	1
TGGT1_239330	transcript=TGGT1_239330-t26_1 | gene=TGGT1_239330 | organism=Toxoplasma_gondii_GT1 | gene_product=Ribosomal protein L37 [Source:UniProtKB/TrEMBL;Acc:A0A125YUV0] | transcript_product=ribosomal protein RPL37 | location=TGGT1_chrVI:546044-548295(+) | protein_length=98 | sequence_SO=chromosome | SO=protein_coding_gene | is_pseudo=false	0	FALSE	5.698	18	2	12	2	98	11.2	11.27	7.85	2	1.108	0.15	0.978807	5.2442e+06	5.81097e+06	1.32	2.98	2	2	5.29348e+06	5.19538e+06	5.68979e+06	5.93474e+06	4.99468e+06	5.19538e+06	4.97813e+06	3.64477e+06	2	2	2	2	High	High	High	High	1	Methylthio [C37; C40]
TGGT1_204340	transcript=TGGT1_204340-t26_1 | gene=TGGT1_204340 | organism=Toxoplasma_gondii_GT1 | gene_product=hypothetical protein | transcript_product=hypothetical protein | location=TGGT1_chrVIIa:1770608-1775101(-) | protein_length=877 | sequence_SO=chromosome | SO=protein_coding_gene | is_pseudo=false	0	FALSE	16.292	9	6	9	6	877	97.2	6.11	3.67	6	1.108	0.15	0.978807	1.21725e+06	1.34812e+06	51.2	85.18	2	2	1.77857e+06	833080	2.70593e+06	671646	1.67817e+06	833080	2.36748e+06	412486	6	5	6	5	High	High	High	Peak Found	1	Methylthio [C408]
TGGT1_225125	transcript=TGGT1_225125-t26_1 | gene=TGGT1_225125 | organism=Toxoplasma_gondii_GT1 | gene_product=Pre-rRNA processing protein [Source:UniProtKB/TrEMBL;Acc:S7W597] | transcript_product=pre-rRNA processing protein | location=TGGT1_chrX:2378306-2392984(+) | protein_length=2871 | sequence_SO=chromosome | SO=protein_coding_gene | is_pseudo=false	0	FALSE	32.18	5	12	18	12	2871	310.5	8.07	18.53	12	1.107	0.15	0.978807	2.30247e+06	2.54926e+06	6.18	54.94	2	2	2.40543e+06	2.20391e+06	3.8414e+06	1.69176e+06	2.26965e+06	2.20391e+06	3.36094e+06	1.03898e+06	10	11	11	11	High	High	High	High	1	Methylthio [C97; C2370]
TGGT1_289320	transcript=TGGT1_289320-t26_1 | gene=TGGT1_289320 | organism=Toxoplasma_gondii_GT1 | gene_product=Protein kinase domain-containing protein [Source:UniProtKB/TrEMBL;Acc:A0A125YW64] | transcript_product=putative casein kinase I | location=TGGT1_chrIX:2993785-3000140(+) | protein_length=432 | sequence_SO=chromosome | SO=protein_coding_gene | is_pseudo=false	0.052	FALSE	1.632	2	1	1	1	432	48.7	9.36	0	1	1.106	0.15	0.979893	395771	437837	32.5	49.34	2	2	500098	313208	630215	304184	471870	313208	551390	186812	1	1	1	1	High	Peak Found	Peak Found	Peak Found	1	Methylthio [C263]
TGGT1_297520	transcript=TGGT1_297520-t26_1 | gene=TGGT1_297520 | organism=Toxoplasma_gondii_GT1 | gene_product=Proteophosphoglycan PPG1 [Source:UniProtKB/TrEMBL;Acc:S7UKZ6] | transcript_product=proteophosphoglycan PPG1 | location=TGGT1_chrII:1824333-1834988(-) | protein_length=1495 | sequence_SO=chromosome | SO=protein_coding_gene | is_pseudo=false	0	FALSE	160.955	34	38	132	38	1495	160.6	7.74	160.62	38	1.105	0.14	0.98236	5.62065e+07	6.21083e+07	17.19	5.48	2	2	6.35113e+07	4.97419e+07	6.45626e+07	5.97472e+07	5.99263e+07	4.97419e+07	5.64874e+07	3.66932e+07	37	37	37	36	High	High	High	High	1	Methylthio [C246; C257; C675; C786; C1002; C1116; C1200; C1315]
TGGT1_288650	transcript=TGGT1_288650-t26_1 | gene=TGGT1_288650 | organism=Toxoplasma_gondii_GT1 | gene_product=Dense granule protein GRA12 [Source:UniProtKB/TrEMBL;Acc:S7VY87] | transcript_product=dense granule protein GRA12 | location=TGGT1_chrIX:2467879-2469672(-) | protein_length=436 | sequence_SO=chromosome | SO=protein_coding_gene | is_pseudo=false	0	FALSE	83.991	46	15	97	15	436	47.9	9.2	181.59	15	1.103	0.14	0.987514	8.48519e+07	9.35689e+07	86.05	38.55	2	2	1.71977e+08	4.18652e+07	1.23762e+08	7.07415e+07	1.62269e+08	4.18652e+07	1.08283e+08	4.34453e+07	16	16	16	16	High	High	High	High	1	Methylthio [C68; C289; C307]
TGGT1_225080	transcript=TGGT1_225080-t26_1 | gene=TGGT1_225080 | organism=Toxoplasma_gondii_GT1 | gene_product=Ribosomal protein RPS18 [Source:UniProtKB/TrEMBL;Acc:A0A125YQT9] | transcript_product=ribosomal protein RPS18 | location=TGGT1_chrX:2450681-2451929(+) | protein_length=156 | sequence_SO=chromosome | SO=protein_coding_gene | is_pseudo=false	0	FALSE	12.512	24	4	18	4	156	17.7	10.61	17.34	4	1.102	0.14	0.988484	5.35617e+06	5.90059e+06	56.66	11.55	2	2	8.18776e+06	3.50384e+06	5.437e+06	6.40371e+06	7.72559e+06	3.50384e+06	4.75696e+06	3.93278e+06	4	4	4	4	High	High	High	High	1
TGGT1_232350	transcript=TGGT1_232350-t26_1 | gene=TGGT1_232350 | organism=Toxoplasma_gondii_GT1 | gene_product=Lactate dehydrogenase LDH1 [Source:UniProtKB/TrEMBL;Acc:A0A125YWC8] | transcript_product=lactate dehydrogenase LDH1 | location=TGGT1_chrVIII:2023599-2025126(+) | protein_length=329 | sequence_SO=chromosome | SO=protein_coding_gene | is_pseudo=false	0	FALSE	37.533	33	9	29	9	329	35.5	6.38	46.19	9	1.101	0.14	0.988605	9.86716e+06	1.08594e+07	65.51	22.68	2	2	1.62906e+07	5.97652e+06	9.2373e+06	1.27664e+07	1.5371e+07	5.97652e+06	8.08193e+06	7.8404e+06	9	7	8	8	High	High	High	High	1	Methylthio [C191]
TGGT1_205220	transcript=TGGT1_205220-t26_1 | gene=TGGT1_205220 | organism=Toxoplasma_gondii_GT1 | gene_product=PRP1_N domain-containing protein [Source:UniProtKB/TrEMBL;Acc:S7UTZ4] | transcript_product=putative U5 snRNP-associated subunit | location=TGGT1_chrVIIa:1443394-1451209(+) | protein_length=1113 | sequence_SO=chromosome | SO=protein_coding_gene | is_pseudo=false	0.007	FALSE	2.517	1	1	1	1	1113	122.7	8.88	1.8	1	1.099	0.14	0.989326	761784	837229	36.27	45.17	2	2	990267	586019	1.16571e+06	601308	934370	586019	1.01991e+06	369288	1	1	1	1	High	Peak Found	Peak Found	Peak Found	1
TGGT1_263090	transcript=TGGT1_263090-t26_1 | gene=TGGT1_263090 | organism=Toxoplasma_gondii_GT1 | gene_product=14_3_3 domain-containing protein [Source:UniProtKB/TrEMBL;Acc:A0A125YLJ3] | transcript_product=14-3-3 protein | location=TGGT1_chrVIIb:786880-789511(+) | protein_length=323 | sequence_SO=chromosome | SO=protein_coding_gene | is_pseudo=false	0	FALSE	66.285	41	15	72	15	323	37.2	5.14	136.38	15	1.099	0.14	0.989326	1.18148e+08	1.29821e+08	10.49	10.99	2	2	1.27262e+08	1.09686e+08	1.20097e+08	1.40333e+08	1.20079e+08	1.09686e+08	1.05076e+08	8.61843e+07	14	16	14	16	High	High	High	High	1	Methylthio [C96; C166]
TGGT1_217570	transcript=TGGT1_217570-t26_1 | gene=TGGT1_217570 | organism=Toxoplasma_gondii_GT1 | gene_product=Ribosomal protein RPS27 [Source:UniProtKB/TrEMBL;Acc:S7WHM0] | transcript_product=ribosomal protein RPS27 | location=TGGT1_chrXII:1851792-1853599(+) | protein_length=151 | sequence_SO=chromosome | SO=protein_coding_gene | is_pseudo=false	0.007	FALSE	2.446	5	1	8	1	151	16.9	9.31	16.62	1	1.099	0.14	0.989326	2.98714e+07	3.28209e+07	37.55	18.68	2	2	3.921e+07	22756892	3.74845e+07	2.87376e+07	36996779	22756892	32796049	17648963	1	1	1	1	High	High	High	High	1	Methylthio [C144]
TGGT1_316340	transcript=TGGT1_316340-t26_1 | gene=TGGT1_316340 | organism=Toxoplasma_gondii_GT1 | gene_product=hypothetical protein | transcript_product=hypothetical protein | location=TGGT1_chrXI:5191484-5192942(+) | protein_length=243 | sequence_SO=chromosome | SO=protein_coding_gene | is_pseudo=false	0	FALSE	69.105	39	10	82	10	243	26.8	4.92	172.98	10	1.099	0.14	0.989326	1.67493e+08	1.8401e+08	2.67	25.07	2	2	1.64358e+08	1.70688e+08	1.53825e+08	2.20119e+08	1.55081e+08	1.70688e+08	1.34585e+08	1.35184e+08	10	12	10	13	High	High	High	High	1	Phospho [S55]
TGGT1_264440	transcript=TGGT1_264440-t26_1 | gene=TGGT1_264440 | organism=Toxoplasma_gondii_GT1 | gene_product=Signal recognition particle receptor beta subunit protein [Source:UniProtKB/TrEMBL;Acc:A0A125YKE8] | transcript_product=signal recognition particle receptor beta subunit protein | location=TGGT1_chrIX:2059841-2063738(-) | protein_length=347 | sequence_SO=chromosome | SO=protein_coding_gene | is_pseud…	0	FALSE	11.481	14	3	8	3	347	37.4	7.15	2.2	3	1.098	0.13	0.990501	721141	791754	42.78	44.77	2	2	985423	527737	1.09894e+06	570434	929799	527737	961491	350327	3	2	3	3	High	High	High	Peak Found	1
TGGT1_216860	transcript=TGGT1_216860-t26_1 | gene=TGGT1_216860 | organism=Toxoplasma_gondii_GT1 | gene_product=DEAD (Asp-Glu-Ala-Asp) box polypeptide DDX39 [Source:UniProtKB/TrEMBL;Acc:A0A125YNR1] | transcript_product=DEAD (Asp-Glu-Ala-Asp) box polypeptide DDX39 | location=TGGT1_chrXI:5764687-5768776(+) | protein_length=434 | sequence_SO=chromosome | SO=protein_coding_gene | is_pseudo=false	0	FALSE	51.957	44	13	50	13	434	49.1	5.85	18.92	13	1.096	0.13	0.992218	8.69463e+06	9.53112e+06	29.04	5.32	2	2	1.07082e+07	7.05968e+06	9.89632e+06	9.1794e+06	1.01038e+07	7.05968e+06	8.65853e+06	5.63745e+06	13	13	12	13	High	High	High	High	1	Methylthio [C86; C206; C318]
TGGT1_230520	transcript=TGGT1_230520-t26_1 | gene=TGGT1_230520 | organism=Toxoplasma_gondii_GT1 | gene_product=Peptidyl-prolyl cis-trans isomerase [Source:UniProtKB/TrEMBL;Acc:S7V2B3] | transcript_product=putative cyclophilin 1 | location=TGGT1_chrVIII:844576-845289(+) | protein_length=237 | sequence_SO=chromosome | SO=protein_coding_gene | is_pseudo=false	0.001	FALSE	5.28	9	2	2	2	237	26.2	8.47	1.65	2	1.096	0.13	0.992218	1.69422e+06	1.85714e+06	45.41	46.02	2	2	2.36335e+06	1.21454e+06	2.60317e+06	1.3249e+06	2.22994e+06	1.21454e+06	2.27758e+06	813679	2	2	2	2	High	Peak Found	Peak Found	Peak Found	1	Methylthio [C233]
TGGT1_312990	transcript=TGGT1_312990-t26_1 | gene=TGGT1_312990 | organism=Toxoplasma_gondii_GT1 | gene_product=RNA helicase [Source:UniProtKB/TrEMBL;Acc:A0A125YGG3] | transcript_product=DEAD/DEAH box ATP-dependent RNA helicase | location=TGGT1_chrXI:2984273-2989253(-) | protein_length=569 | sequence_SO=chromosome | SO=protein_coding_gene | is_pseudo=false	0.001	FALSE	4.055	4	2	2	2	569	63.8	8.94	0	2	1.096	0.13	0.992218	421677	462157	8.39	47.47	2	2	447474	397368	655326	325928	422216	397368	573360	200166	2	2	2	2	Peak Found	Peak Found	High	Peak Found	1
TGGT1_294620	transcript=TGGT1_294620-t26_1 | gene=TGGT1_294620 | organism=Toxoplasma_gondii_GT1 | gene_product=Eukaryotic translation initiation factor 3 subunit C [Source:UniProtKB/TrEMBL;Acc:A0A125YXE7] | transcript_product=putative eukaryotic initiation factor-3, subunit 8 | location=TGGT1_chrIa:989669-996523(-) | protein_length=971 | sequence_SO=chromosome | SO=protein_coding_gene | is_pseudo=false	0	FALSE	31.2	11	10	30	10	971	109.1	6.32	29.28	10	1.095	0.13	0.992218	6.17581e+06	6.76503e+06	40.03	37.72	2	2	8.26163e+06	4.6166e+06	8.89161e+06	5.14705e+06	7.7953e+06	4.6166e+06	7.77948e+06	3.16102e+06	10	10	10	10	High	High	High	High	1	Methylthio [C656]
TGGT1_217780	transcript=TGGT1_217780-t26_1 | gene=TGGT1_217780 | organism=Toxoplasma_gondii_GT1 | gene_product=Sec20 protein [Source:UniProtKB/TrEMBL;Acc:S7WHF4] | transcript_product=Sec20 protein | location=TGGT1_chrXII:2045977-2055050(-) | protein_length=779 | sequence_SO=chromosome | SO=protein_coding_gene | is_pseudo=false	0.052	FALSE	1.621	3	1	6	1	779	83.1	6.43	0	1	1.095	0.13	0.992486	8.04269e+07	8.80483e+07	6.7	55.31	2	2	8.43346e+07	7.67002e+07	5.82537e+07	1.33082e+08	7.95743e+07	7.67002e+07	5.09676e+07	8.17311e+07	1	1	1	1	High	High	High	High	1	Phospho [S137]
TGGT1_253430	transcript=TGGT1_253430-t26_1 | gene=TGGT1_253430 | organism=Toxoplasma_gondii_GT1 | gene_product=Glutamine amidotransferase type-2 domain-containing protein [Source:UniProtKB/TrEMBL;Acc:A0A125YQ67] | transcript_product=putative asparagine synthetase | location=TGGT1_chrIII:924367-930594(+) | protein_length=588 | sequence_SO=chromosome | SO=protein_coding_gene | is_pseudo=false	0	FALSE	18.566	12	7	21	7	588	65.8	6.73	16.18	7	1.094	0.13	0.992486	2.95278e+06	3.22941e+06	14.87	7.13	2	2	3.28135e+06	2.65711e+06	3.39663e+06	3.07042e+06	3.09613e+06	2.65711e+06	2.97179e+06	1.88567e+06	7	7	7	7	High	High	High	High	1	Methylthio [C238; C417; C569]
TGGT1_310700	transcript=TGGT1_310700-t26_1 | gene=TGGT1_310700 | organism=Toxoplasma_gondii_GT1 | gene_product=Serine/threonine-protein phosphatase [Source:UniProtKB/TrEMBL;Acc:A0A125YY12] | transcript_product=serine/threonine phosophatase PP1 | location=TGGT1_chrXI:1487440-1488915(-) | protein_length=306 | sequence_SO=chromosome | SO=protein_coding_gene | is_pseudo=false	0	FALSE	31.6	26	7	41	7	306	35	5.72	47.05	7	1.094	0.13	0.992486	1.18223e+07	1.29281e+07	40.31	33.27	2	2	1.58495e+07	8.8184e+06	1.64302e+07	1.01724e+07	1.49549e+07	8.8184e+06	1.43752e+07	6.2473e+06	7	7	7	7	High	High	High	High	1	Methylthio [C61; C126; C139; C244]
TGGT1_230160	transcript=TGGT1_230160-t26_1 | gene=TGGT1_230160 | organism=Toxoplasma_gondii_GT1 | gene_product=hypothetical protein | transcript_product=hypothetical protein | location=TGGT1_chrVIII:647435-648305(-) | protein_length=142 | sequence_SO=chromosome | SO=protein_coding_gene | is_pseudo=false	0	FALSE	119.496	97	16	134	16	142	15.8	6.18	267.41	16	1.091	0.13	0.992622	2.67583e+08	2.91915e+08	37.4	32.47	2	2	2.04078e+08	3.50849e+08	2.31068e+08	3.68785e+08	1.92558e+08	3.50849e+08	2.02167e+08	2.26486e+08	15	20	18	18	High	High	High	High	1	Methylthio [C23]; Phospho [S5; S96; T112]
TGGT1_211690	transcript=TGGT1_211690-t26_1 | gene=TGGT1_211690 | organism=Toxoplasma_gondii_GT1 | gene_product=DRBM domain-containing protein [Source:UniProtKB/TrEMBL;Acc:S7UKM4] | transcript_product=AAA family protein | location=TGGT1_chrIV:1531700-1551811(-) | protein_length=1538 | sequence_SO=chromosome | SO=protein_coding_gene | is_pseudo=false	0.025	FALSE	1.919	1	1	1	1	1538	167.1	8.87	0	1	1.091	0.13	0.992622	71751.6	78260.9	37.89	56.26	2	2	94426.2	54521.9	119233	51368.2	89096.1	54521.9	104319	31547.4	1	1	1	1	High	Peak Found	Peak Found	Peak Found	1	Methylthio [C785]
TGGT1_279100	transcript=TGGT1_279100-t26_1 | gene=TGGT1_279100 | organism=Toxoplasma_gondii_GT1 | gene_product=hypothetical protein | transcript_product=hypothetical protein | location=AAQM03000427:32-1883(+) | protein_length=435 | sequence_SO=contig | SO=protein_coding_gene | is_pseudo=false	0	FALSE	58.686	36	12	52	1	435	48	7.5	90.4	12	1.09	0.12	0.992622	311630	339522	17.47	60.19	2	2	352827	275242	534906	215506	332912	275242	468002	132351	1	1	1	1	High	Peak Found	High	Peak Found	1
TGGT1_265190	transcript=TGGT1_265190-t26_1 | gene=TGGT1_265190 | organism=Toxoplasma_gondii_GT1 | gene_product=ULP_PROTEASE domain-containing protein [Source:UniProtKB/TrEMBL;Acc:S7UGW1] | transcript_product=Ulp1 protease family, C-terminal catalytic domain-containing protein | location=TGGT1_chrIX:1529797-1543022(+) | protein_length=3028 | sequence_SO=chromosome | SO=protein_coding_gene | is_pseudo=false	0.022	FALSE	1.98	0	1	8	1	3028	329.7	5.14	14.24	1	1.088	0.12	0.992777	1.02878e+08	1.11955e+08	11.64	28.63	2	2	1.11725e+08	94731256	1.37469e+08	9.11761e+07	105418776	94731256	120275088	55995008	1	1	1	1	High	High	High	High	1
TGGT1_256760	transcript=TGGT1_256760-t26_1 | gene=TGGT1_256760 | organism=Toxoplasma_gondii_GT1 | gene_product=Pyruvate kinase [Source:UniProtKB/TrEMBL;Acc:A0A125YPV3] | transcript_product=pyruvate kinase PyK1 | location=TGGT1_chrVIIb:4413512-4417055(-) | protein_length=531 | sequence_SO=chromosome | SO=protein_coding_gene | is_pseudo=false	0	FALSE	23.691	17	7	21	7	531	57.5	6.4	13.59	7	1.088	0.12	0.992777	3.36704e+06	3.66249e+06	2.16	40.26	2	2	3.31596e+06	3.41891e+06	2.73286e+06	4.90837e+06	3.12879e+06	3.41891e+06	2.39104e+06	3.01443e+06	7	7	7	7	High	High	High	High	1
TGGT1_309752	transcript=TGGT1_309752-t26_1 | gene=TGGT1_309752 | organism=Toxoplasma_gondii_GT1 | gene_product=Succinate--CoA ligase [ADP-forming] subunit beta, mitochondrial [Source:UniProtKB/TrEMBL;Acc:A0A125YHZ3] | transcript_product=putative succinate-Coenzyme A ligase, beta subunit | location=TGGT1_chrXI:749202-752425(+) | protein_length=498 | sequence_SO=chromosome | SO=protein_coding_gene | is_pseudo=f…	0	FALSE	27.458	19	7	21	7	498	53.4	6.48	22.54	7	1.087	0.12	0.992777	3.33011e+06	3.61846e+06	55.07	42.45	2	2	5.0234e+06	2.20759e+06	4.93203e+06	2.65474e+06	4.73985e+06	2.20759e+06	4.31515e+06	1.63038e+06	6	5	7	6	High	High	High	High	1	Methylthio [C281; C300]
TGGT1_299110	transcript=TGGT1_299110-t26_1 | gene=TGGT1_299110 | organism=Toxoplasma_gondii_GT1 | gene_product=Cleft lip and palate transmembrane protein 1 (Clptm1) protein [Source:UniProtKB/TrEMBL;Acc:S7UMP9] | transcript_product=cleft lip and palate transmembrane protein 1 (clptm1) protein | location=TGGT1_chrIII:2152699-2160213(+) | protein_length=619 | sequence_SO=chromosome | SO=protein_coding_gene | is_…	0	FALSE	5.702	4	2	3	2	619	71.3	7.87	0	2	1.084	0.12	0.992903	455960	494480	33.46	42.35	2	2	580334	358241	673488	363050	547576	358241	589251	222964	2	2	2	2	High	Peak Found	High	Peak Found	1
TGGT1_249590	transcript=TGGT1_249590-t26_1 | gene=TGGT1_249590 | organism=Toxoplasma_gondii_GT1 | gene_product=Proteasome subunit alpha type [Source:UniProtKB/TrEMBL;Acc:A0A125YVM8] | transcript_product=putative proteasome subunit alpha type 5-2 | location=TGGT1_chrXII:4602436-4606174(+) | protein_length=258 | sequence_SO=chromosome | SO=protein_coding_gene | is_pseudo=false	0.003	FALSE	2.772	4	1	1	1	258	28.3	5.08	0	1	1.083	0.12	0.992903	507934	550226	21.85	8.38	2	2	593529	434683	583864	518526	560026	434683	510836	318448	1	1	1	1	Peak Found	Peak Found	Peak Found	High	1
TGGT1_209030	transcript=TGGT1_209030-t26_1 | gene=TGGT1_209030 | organism=Toxoplasma_gondii_GT1 | gene_product=Actin ACT1 [Source:UniProtKB/TrEMBL;Acc:A0A125YH17] | transcript_product=actin ACT1 | location=TGGT1_chrIb:1014618-1016180(+) | protein_length=376 | sequence_SO=chromosome | SO=protein_coding_gene | is_pseudo=false	0	FALSE	111.112	59	17	225	16	376	41.9	5.16	392.2	17	1.081	0.11	0.992903	7.60977e+08	8.2277e+08	9.77	25.46	2	2	8.15494e+08	7.10105e+08	6.85836e+08	9.87045e+08	7.69462e+08	7.10105e+08	6.00054e+08	6.06185e+08	20	20	20	20	High	High	High	High	1	Methylthio [C53; C258; C286]
TGGT1_210370	transcript=TGGT1_210370-t26_1 | gene=TGGT1_210370 | organism=Toxoplasma_gondii_GT1 | gene_product=hypothetical protein | transcript_product=hypothetical protein | location=TGGT1_chrIX:4634440-4635879(-) | protein_length=479 | sequence_SO=chromosome | SO=protein_coding_gene | is_pseudo=false	0	FALSE	9.943	10	3	9	3	479	52.4	9.14	8.3	3	1.081	0.11	0.992903	982732	1.06193e+06	34.12	42.6	2	2	1.257e+06	768305	1.44911e+06	778197	1.18605e+06	768305	1.26786e+06	477923	3	3	3	3	High	High	High	High	1
TGGT1_210840	transcript=TGGT1_210840-t26_1 | gene=TGGT1_210840 | organism=Toxoplasma_gondii_GT1 | gene_product=Arginyl-tRNA synthetase family protein [Source:UniProtKB/TrEMBL;Acc:S7UKP6] | transcript_product=arginyl-tRNA synthetase family protein | location=TGGT1_chrIV:1942834-1951568(-) | protein_length=595 | sequence_SO=chromosome | SO=protein_coding_gene | is_pseudo=false	0.021	FALSE	1.968	1	1	2	1	595	67	6.51	0	1	1.081	0.11	0.992903	485533	524643	68.86	43.41	2	2	826513	285225	720460	382049	779860	285225	630347	234632	1	1	1	1	High	Peak Found	High	Peak Found	1	Methylthio [C239]
TGGT1_290030	transcript=TGGT1_290030-t26_1 | gene=TGGT1_290030 | organism=Toxoplasma_gondii_GT1 | gene_product=hypothetical protein | transcript_product=hypothetical protein | location=TGGT1_chrIX:3401903-3405184(-) | protein_length=229 | sequence_SO=chromosome | SO=protein_coding_gene | is_pseudo=false	0.022	FALSE	1.993	5	1	2	1	229	26.5	9.99	0	1	1.079	0.11	0.992903	150422	162309	53.97	6.36	2	2	224846	100633	155162	169784	212154	100633	135755	104272	1	1	1	1	High	Peak Found	Peak Found	High	1
TGGT1_299780	transcript=TGGT1_299780-t26_1 | gene=TGGT1_299780 | organism=Toxoplasma_gondii_GT1 | gene_product=hypothetical protein | transcript_product=hypothetical protein | location=TGGT1_chrXII:309236-312184(-) | protein_length=545 | sequence_SO=chromosome | SO=protein_coding_gene | is_pseudo=false	0	FALSE	25.918	18	8	15	8	545	59.2	9.6	24.82	8	1.079	0.11	0.992903	3.24035e+06	3.49619e+06	10.82	61.38	2	2	3.00114e+06	3.49862e+06	5.5651e+06	2.19643e+06	2.83174e+06	3.49862e+06	4.86904e+06	1.34892e+06	6	8	7	7	High	High	High	High	1	Methylthio [C74]
TGGT1_221522	transcript=TGGT1_221522-t26_1 | gene=TGGT1_221522 | organism=Toxoplasma_gondii_GT1 | gene_product=Coatomer subunit delta [Source:UniProtKB/TrEMBL;Acc:S7UKG7] | transcript_product=adaptor complexes medium subunit family protein | location=TGGT1_chrII:393309-399736(+) | protein_length=571 | sequence_SO=chromosome | SO=protein_coding_gene | is_pseudo=false	0	FALSE	9.607	9	4	5	4	571	61.1	5.86	2.22	4	1.078	0.11	0.992903	1.09519e+06	1.1811e+06	4.98	22.23	2	2	1.13442e+06	1.05731e+06	1.384e+06	1.00795e+06	1.07038e+06	1.05731e+06	1210892	619026	4	4	3	4	High	High	High	Peak Found	1	Methylthio [C45]
TGGT1_222160	transcript=TGGT1_222160-t26_1 | gene=TGGT1_222160 | organism=Toxoplasma_gondii_GT1 | gene_product=Aldedh domain-containing protein [Source:UniProtKB/TrEMBL;Acc:S7VZX7] | transcript_product=aldehyde dehydrogenase | location=TGGT1_chrII:900932-907660(-) | protein_length=497 | sequence_SO=chromosome | SO=protein_coding_gene | is_pseudo=false	0.002	FALSE	2.972	2	1	4	1	497	53.7	6.39	7.43	1	1.078	0.11	0.992903	1.01145e+06	1.09002e+06	41.96	7.57	2	2	1.37336e+06	744913	1.15005e+06	1.03312e+06	1.29584e+06	744913	1.0062e+06	634483	1	1	1	1	High	High	High	High	1
TGGT1_202500	transcript=TGGT1_202500-t26_1 | gene=TGGT1_202500 | organism=Toxoplasma_gondii_GT1 | gene_product=GAPM1a [Source:UniProtKB/TrEMBL;Acc:A0A125YZ75] | transcript_product=GAPM1a | location=TGGT1_chrVIIa:3172046-3174108(-) | protein_length=305 | sequence_SO=chromosome | SO=protein_coding_gene | is_pseudo=false	0	FALSE	11.476	27	4	13	4	305	33.5	5.1	9.49	4	1.077	0.11	0.992903	3.90729e+06	4.21003e+06	25.5	37.02	2	2	3.25609e+06	4.68874e+06	3.22028e+06	5.50399e+06	3.07229e+06	4.68874e+06	2.81749e+06	3380231	4	4	4	4	High	High	High	High	1	Methylthio [C300; C303]
TGGT1_207770	transcript=TGGT1_207770-t26_1 | gene=TGGT1_207770 | organism=Toxoplasma_gondii_GT1 | gene_product=PCI domain-containing protein [Source:UniProtKB/TrEMBL;Acc:A0A125YVW7] | transcript_product=PCI domain-containing protein | location=TGGT1_chrIb:293641-299816(-) | protein_length=511 | sequence_SO=chromosome | SO=protein_coding_gene | is_pseudo=false	0.001	FALSE	5.614	4	2	4	2	511	55.5	5.44	0	2	1.077	0.11	0.992903	341559	367994	46.37	0.38	2	2	480110	242991	368984	367007	453010	242991	322833	225394	2	2	2	2	High	High	High	Peak Found	1
TGGT1_207390	transcript=TGGT1_207390-t26_1 | gene=TGGT1_207390 | organism=Toxoplasma_gondii_GT1 | gene_product=MHD domain-containing protein [Source:UniProtKB/TrEMBL;Acc:A0A125YV18] | transcript_product=putative coatomer protein complex, gamma sub-unit | location=TGGT1_chrIb:35486-42587(-) | protein_length=517 | sequence_SO=chromosome | SO=protein_coding_gene | is_pseudo=false	0.056	FALSE	1.557	2	1	2	1	517	56	8.35	1.61	1	1.076	0.11	0.992903	249447	268361	NA	39.54	1	2	NA	249447	357662	201357	NA	249447	312927	123662	NA	1	1	1	Not Found	High	High	Peak Found	1
TGGT1_272000	transcript=TGGT1_272000-t26_1 | gene=TGGT1_272000 | organism=Toxoplasma_gondii_GT1 | gene_product=hypothetical protein | transcript_product=hypothetical protein | location=TGGT1_chrVIII:4223510-4232692(+) | protein_length=1541 | sequence_SO=chromosome | SO=protein_coding_gene | is_pseudo=false	0	FALSE	46.66	12	14	44	14	1541	168.8	8.25	56.86	14	1.075	0.1	0.992903	5.99137e+06	6.44039e+06	14.92	0.65	2	2	5.38947e+06	6.66049e+06	6.41078e+06	6.47014e+06	5.08526e+06	6.66049e+06	5.60895e+06	3.97358e+06	11	12	12	12	High	High	High	High	1	Methylthio [C399; C903; C910; C1437]
TGGT1_309210	transcript=TGGT1_309210-t26_1 | gene=TGGT1_309210 | organism=Toxoplasma_gondii_GT1 | gene_product=Thioredoxin domain-containing protein [Source:UniProtKB/TrEMBL;Acc:S7W128] | transcript_product=putative peroxiredoxin 6 | location=TGGT1_chrXI:521482-524360(-) | protein_length=402 | sequence_SO=chromosome | SO=protein_coding_gene | is_pseudo=false	0	FALSE	16.158	12	5	10	5	402	44.1	8.44	12.08	5	1.075	0.1	0.992903	2.2541e+06	2.42288e+06	0.89	52.09	2	2	2.24001e+06	2.26827e+06	1.64621e+06	3.56598e+06	2.11357e+06	2.26827e+06	1.44031e+06	2.19001e+06	4	5	4	5	High	High	High	High	1	Methylthio [C251]
TGGT1_235020	transcript=TGGT1_235020-t26_1 | gene=TGGT1_235020 | organism=Toxoplasma_gondii_GT1 | gene_product=WD_REPEATS_REGION domain-containing protein [Source:UniProtKB/TrEMBL;Acc:S7UVW7] | transcript_product=putative COPI protein | location=TGGT1_chrX:4501792-4518157(-) | protein_length=1256 | sequence_SO=chromosome | SO=protein_coding_gene | is_pseudo=false	0.015	FALSE	2.105	1	1	1	1	1256	137	6.16	0	1	1.075	0.1	0.992903	453147	486923	10.36	NA	2	1	487643	421092	NA	486923	460117	421092	NA	299040	1	1	NA	1	High	Peak Found	Not Found	Peak Found	1
TGGT1_242790A	transcript=TGGT1_242790A-t26_1 | gene=TGGT1_242790A | organism=Toxoplasma_gondii_GT1 | gene_product=Putative trichohyalin [Source:UniProtKB/TrEMBL;Acc:S7W721] | transcript_product=putative trichohyalin | location=TGGT1_chrVI:2195987-2203778(+) | protein_length=693 | sequence_SO=chromosome | SO=protein_coding_gene | is_pseudo=false	0	FALSE	34.442	19	6	16	5	693	81.3	6.89	49.78	6	1.07	0.1	0.992903	1.88164e+06	2.01361e+06	12.25	18.65	2	2	1.72509e+06	2.05239e+06	1.76341e+06	2.29932e+06	1.62772e+06	2.05239e+06	1.54285e+06	1.41211e+06	3	3	3	3	High	High	High	High	1
TGGT1_304955	transcript=TGGT1_304955-t26_1 | gene=TGGT1_304955 | organism=Toxoplasma_gondii_GT1 | gene_product=PPM-type phosphatase domain-containing protein [Source:UniProtKB/TrEMBL;Acc:S7VWJ7] | transcript_product=serine/threonine specific protein phosphatase | location=TGGT1_chrIX:4886317-4901581(-) | protein_length=2883 | sequence_SO=chromosome | SO=protein_coding_gene | is_pseudo=false	0	FALSE	25.247	4	6	18	6	2883	303.5	9.6	25.57	6	1.07	0.1	0.992903	4.06698e+06	4.34966e+06	47.62	74.33	2	2	5.7734e+06	2.86491e+06	7.80031e+06	2.42548e+06	5.44751e+06	2.86491e+06	6.82467e+06	1.48959e+06	6	6	6	6	High	High	High	High	1
TGGT1_263300	transcript=TGGT1_263300-t26_1 | gene=TGGT1_263300 | organism=Toxoplasma_gondii_GT1 | gene_product=Eukaryotic porin protein [Source:UniProtKB/TrEMBL;Acc:A0A125YUJ9] | transcript_product=eukaryotic porin protein | location=TGGT1_chrVIIb:618828-622551(-) | protein_length=290 | sequence_SO=chromosome | SO=protein_coding_gene | is_pseudo=false	0	FALSE	32.96	31	8	24	8	290	31.3	8.94	31.99	8	1.069	0.1	0.992903	4.93534e+06	5.2776e+06	115.47	35.84	2	2	1.55268e+07	1.56874e+06	6.83815e+06	4.07319e+06	1.46504e+07	1.56874e+06	5.98286e+06	2.50152e+06	8	6	7	7	High	High	High	High	1	Methylthio [C11; C59]
TGGT1_252360	transcript=TGGT1_252360-t26_1 | gene=TGGT1_252360 | organism=Toxoplasma_gondii_GT1 | gene_product=Protein kinase domain-containing protein [Source:UniProtKB/TrEMBL;Acc:S7VW28] | transcript_product=rhoptry kinase family protein ROP24 (incomplete catalytic triad) | location=TGGT1_chrIII:494762-496369(+) | protein_length=535 | sequence_SO=chromosome | SO=protein_coding_gene | is_pseudo=false	0	FALSE	13.527	10	4	10	4	535	60.8	9.45	13.86	4	1.069	0.1	0.992903	2.35751e+06	2.51946e+06	38.29	49.82	2	2	3.11203e+06	1.78592e+06	3.64036e+06	1.7437e+06	2936365	1.78592e+06	3.18504e+06	1.07088e+06	4	3	4	4	High	High	High	High	1
TGGT1_246970	transcript=TGGT1_246970-t26_1 | gene=TGGT1_246970 | organism=Toxoplasma_gondii_GT1 | gene_product=HRDC domain-containing protein [Source:UniProtKB/TrEMBL;Acc:S7WH19] | transcript_product=3'-5' exonuclease domain-containing protein | location=TGGT1_chrXII:2974590-2984891(-) | protein_length=1353 | sequence_SO=chromosome | SO=protein_coding_gene | is_pseudo=false	0.001	FALSE	3.192	1	1	4	1	1353	145.8	6.43	1.71	1	1.069	0.1	0.992903	430578	460149	3.85	27.14	2	2	419020	442455	558841	378886	395368	442455	488943	232690	1	1	1	1	High	High	High	High	1
TGGT1_299210	transcript=TGGT1_299210-t26_1 | gene=TGGT1_299210 | organism=Toxoplasma_gondii_GT1 | gene_product=CTP synthase [Source:UniProtKB/TrEMBL;Acc:A0A125YWQ6] | transcript_product=CTP synthase | location=TGGT1_chrIII:2095036-2100826(+) | protein_length=652 | sequence_SO=chromosome | SO=protein_coding_gene | is_pseudo=false	0.052	FALSE	1.619	4	1	1	1	652	70.9	7.25	0	1	1.069	0.1	0.992903	144242	154145	5.14	33.54	2	2	149588	139088	121036	196311	141144	139088	105898	120563	1	1	1	1	High	Peak Found	Peak Found	Peak Found	1
TGGT1_262690	transcript=TGGT1_262690-t26_1 | gene=TGGT1_262690 | organism=Toxoplasma_gondii_GT1 | gene_product=Ribosomal protein RPL27 [Source:UniProtKB/TrEMBL;Acc:S7UYE2] | transcript_product=ribosomal protein RPL27 | location=TGGT1_chrVIIb:1055303-1056255(+) | protein_length=142 | sequence_SO=chromosome | SO=protein_coding_gene | is_pseudo=false	0	FALSE	18.819	40	6	31	6	142	16.3	10.37	60.06	6	1.067	0.09	0.992903	1.72104e+07	1.83717e+07	10.14	29.58	2	2	1.84914e+07	1.60181e+07	2.27175e+07	1.48572e+07	1.74476e+07	1.60181e+07	1.9876e+07	9.12444e+06	6	6	6	6	High	High	High	High	1
TGGT1_311720	transcript=TGGT1_311720-t26_1 | gene=TGGT1_311720 | organism=Toxoplasma_gondii_GT1 | gene_product=Chaperonin protein BiP [Source:UniProtKB/TrEMBL;Acc:A0A125YJG4] | transcript_product=chaperonin protein BiP | location=TGGT1_chrXI:2188121-2191497(-) | protein_length=668 | sequence_SO=chromosome | SO=protein_coding_gene | is_pseudo=false	0	FALSE	113.296	45	23	128	22	668	73.2	5.38	192.89	23	1.067	0.09	0.992903	9.19778e+07	9.81811e+07	13.23	16.69	2	2	1.01024e+08	8.37413e+07	1.10538e+08	8.72056e+07	9.5322e+07	8.37413e+07	9.67123e+07	5.35566e+07	20	21	19	22	High	High	High	High	1	Methylthio [C634]
TGGT1_312230	transcript=TGGT1_312230-t26_1 | gene=TGGT1_312230 | organism=Toxoplasma_gondii_GT1 | gene_product=DNA topoisomerase 2 [Source:UniProtKB/TrEMBL;Acc:S7W1T2] | transcript_product=putative DNA topoisomerase 2 | location=TGGT1_chrXI:2472947-2490813(-) | protein_length=1658 | sequence_SO=chromosome | SO=protein_coding_gene | is_pseudo=false	0.064	FALSE	1.499	0	1	3	1	1658	185.8	7.44	2.26	1	1.066	0.09	0.992903	1.71639e+06	1.82919e+06	24.68	81.51	2	2	2.04739e+06	1.4389e+06	3.52861e+06	948226	1931821	1.4389e+06	3.08726e+06	582345	1	1	1	1	High	High	Peak Found	Peak Found	1
TGGT1_295420	transcript=TGGT1_295420-t26_1 | gene=TGGT1_295420 | organism=Toxoplasma_gondii_GT1 | gene_product=hypothetical protein | transcript_product=hypothetical protein | location=TGGT1_chrIa:1740779-1746947(-) | protein_length=735 | sequence_SO=chromosome | SO=protein_coding_gene | is_pseudo=false	0	FALSE	43.406	21	15	50	15	735	80.6	5.33	55.82	15	1.064	0.09	0.992903	1.95468e+07	2.08013e+07	4.94	16.35	2	2	2.02425e+07	1.88751e+07	1.8521e+07	2.33624e+07	1.90999e+07	1.88751e+07	1.62045e+07	1.43478e+07	15	15	14	15	High	High	High	High	1	Methylthio [C118; C609; C610; C677; C681]
TGGT1_267350	transcript=TGGT1_267350-t26_1 | gene=TGGT1_267350 | organism=Toxoplasma_gondii_GT1 | gene_product=Small nuclear ribonucleoprotein Sm D1 [Source:UniProtKB/TrEMBL;Acc:A0A125YGA0] | transcript_product=LSM domain-containing protein | location=TGGT1_chrIX:540789-541154(-) | protein_length=121 | sequence_SO=chromosome | SO=protein_coding_gene | is_pseudo=false	0.001	FALSE	5.145	11	1	4	1	121	13.5	11.68	7.17	1	1.064	0.09	0.992903	850411	904914	NA	6.62	1	2	850411	NA	863523	948288	802408	NA	755517	582383	1	NA	1	1	High	High	High	High	1
TGGT1_271930	transcript=TGGT1_271930-t26_1 | gene=TGGT1_271930 | organism=Toxoplasma_gondii_GT1 | gene_product=hypothetical protein | transcript_product=hypothetical protein | location=TGGT1_chrVIII:4274565-4276322(+) | protein_length=234 | sequence_SO=chromosome | SO=protein_coding_gene | is_pseudo=false	0	FALSE	92.597	68	10	78	10	234	26.1	5.31	196.06	10	1.064	0.09	0.992903	9.37861e+07	9.97909e+07	9.27	10.59	2	2	1.00146e+08	8.78296e+07	1.07569e+08	9.25751e+07	9.44936e+07	8.78296e+07	9.41147e+07	5.68542e+07	12	13	12	13	High	High	High	High	1	Phospho [S107; T154; S155; T160]; Methylthio [C17; C71]
TGGT1_312630	transcript=TGGT1_312630-t26_1 | gene=TGGT1_312630 | organism=Toxoplasma_gondii_GT1 | gene_product=Putative anonymous antigen-1 [Source:UniProtKB/TrEMBL;Acc:S7W1P0] | transcript_product=putative anonymous antigen-1 | location=TGGT1_chrXI:2804165-2821550(-) | protein_length=2639 | sequence_SO=chromosome | SO=protein_coding_gene | is_pseudo=false	0.058	FALSE	1.546	0	1	1	1	2639	286	5	0	1	1.063	0.09	0.992903	339108	360318	0.49	16.38	2	2	340293	337927	320751	404766	321085	337927	280633	248584	1	1	1	1	Peak Found	Peak Found	Peak Found	High	1
TGGT1_262620	transcript=TGGT1_262620-t26_1 | gene=TGGT1_262620 | organism=Toxoplasma_gondii_GT1 | gene_product=RNA recognition motif-containing protein [Source:UniProtKB/TrEMBL;Acc:A0A125YHM1] | transcript_product=RNA recognition motif-containing protein | location=TGGT1_chrVIIb:1093901-1096823(+) | protein_length=293 | sequence_SO=chromosome | SO=protein_coding_gene | is_pseudo=false	0	FALSE	36.586	34	9	41	9	293	31.7	9.07	63.14	9	1.062	0.09	0.992903	1.30946e+07	1.39034e+07	45.53	7.9	2	2	1.82842e+07	9.37794e+06	1.31476e+07	1.47027e+07	1.72521e+07	9.37794e+06	1.15031e+07	9.02952e+06	9	9	9	9	High	High	High	High	1	Methylthio [C22]
TGGT1_306060	transcript=TGGT1_306060-t26_1 | gene=TGGT1_306060 | organism=Toxoplasma_gondii_GT1 | gene_product=Rhoptry neck protein RON8 [Source:UniProtKB/TrEMBL;Acc:A0A125YNG1] | transcript_product=rhoptry neck protein RON8 | location=TGGT1_chrIX:5560917-5575203(-) | protein_length=2980 | sequence_SO=chromosome | SO=protein_coding_gene | is_pseudo=false	0	FALSE	485.071	45	99	478	99	2980	328.8	8.4	721.56	99	1.062	0.09	0.992903	3.13049e+08	3.32302e+08	59.97	56.63	2	2	4.9223e+08	1.99094e+08	5.07877e+08	2.17424e+08	4.64446e+08	1.99094e+08	4.44353e+08	1.33529e+08	97	93	97	91	High	High	High	High	1	Methylthio [C649; C1025; C1467; C1656; C1673; C1890; C2076]
TGGT1_269960	transcript=TGGT1_269960-t26_1 | gene=TGGT1_269960 | organism=Toxoplasma_gondii_GT1 | gene_product=14_3_3 domain-containing protein [Source:UniProtKB/TrEMBL;Acc:S7V4X7] | transcript_product=14-3-3 superfamily protein | location=TGGT1_chrVIII:5492015-5497834(+) | protein_length=476 | sequence_SO=chromosome | SO=protein_coding_gene | is_pseudo=false	0.001	FALSE	3.571	2	1	3	1	476	51.4	5.3	0	1	1.061	0.08	0.992903	268012	284273	2.84	3.99	2	2	262680	273451	292414	276360	247853	273451	255840	169724	1	1	1	1	High	High	Peak Found	High	1
TGGT1_261950	transcript=TGGT1_261950-t26_1 | gene=TGGT1_261950 | organism=Toxoplasma_gondii_GT1 | gene_product=ATP synthase subunit beta [Source:UniProtKB/TrEMBL;Acc:A0A125YYY4] | transcript_product=ATP synthase beta subunit ATP-B | location=TGGT1_chrVIIb:1457013-1460114(-) | protein_length=560 | sequence_SO=chromosome | SO=protein_coding_gene | is_pseudo=false	0	FALSE	54.421	32	13	52	13	560	59.9	6.87	48.13	13	1.061	0.08	0.992903	3.66497e+07	3.88723e+07	41.8	26.93	2	2	4.97039e+07	2.7024e+07	4.71369e+07	3.20567e+07	4.68983e+07	2.7024e+07	4.12412e+07	1.96874e+07	13	12	13	13	High	High	High	High	1
TGGT1_309810	transcript=TGGT1_309810-t26_1 | gene=TGGT1_309810 | organism=Toxoplasma_gondii_GT1 | gene_product=Ribosomal protein RPP2 [Source:UniProtKB/TrEMBL;Acc:A0A125YFT3] | transcript_product=ribosomal protein RPP2 | location=TGGT1_chrXI:791021-791848(-) | protein_length=113 | sequence_SO=chromosome | SO=protein_coding_gene | is_pseudo=false	0.001	FALSE	5.161	34	2	2	2	113	11.8	4.53	0	2	1.061	0.08	0.992903	3.31496e+06	3.51593e+06	17.14	46.81	2	2	3.74434e+06	2.93481e+06	4.95932e+06	2.49264e+06	3.53299e+06	2.93481e+06	4.33903e+06	1.53083e+06	1	2	1	2	Peak Found	Peak Found	Peak Found	High	1
TGGT1_232660	transcript=TGGT1_232660-t26_1 | gene=TGGT1_232660 | organism=Toxoplasma_gondii_GT1 | gene_product=TPR_REGION domain-containing protein [Source:UniProtKB/TrEMBL;Acc:S7WBV4] | transcript_product=Hsp70 interacting protein HIP | location=TGGT1_chrVIII:2206171-2208838(-) | protein_length=425 | sequence_SO=chromosome | SO=protein_coding_gene | is_pseudo=false	0.02	FALSE	2.028	2	1	2	1	425	45.2	5.31	0	1	1.06	0.08	0.992903	160537	170181	70.43	35.06	2	2	277322	92932.1	132116	219214	261668	92932.1	115591	134629	1	1	1	1	High	Peak Found	Peak Found	High	1
TGGT1_255260	transcript=TGGT1_255260-t26_1 | gene=TGGT1_255260 | organism=Toxoplasma_gondii_GT1 | gene_product=Apical membrane antigen AMA1 [Source:UniProtKB/TrEMBL;Acc:S7WI53] | transcript_product=apical membrane antigen AMA1 | location=TGGT1_chrVIIb:4856406-4860874(+) | protein_length=569 | sequence_SO=chromosome | SO=protein_coding_gene | is_pseudo=false	0	FALSE	74.259	34	14	63	14	569	63	6.16	97.6	14	1.059	0.08	0.992903	2.0175e+07	2.13611e+07	62.63	54.53	2	2	3.24674e+07	1.25367e+07	3.2077e+07	1.4225e+07	3.06347e+07	1.25367e+07	2.80649e+07	8.73619e+06	13	14	13	14	High	High	High	High	1	Methylthio [C117; C194; C304; C447; C452]
TGGT1_214790	transcript=TGGT1_214790-t26_1 | gene=TGGT1_214790 | organism=Toxoplasma_gondii_GT1 | gene_product=Glycoprotein [Source:UniProtKB/TrEMBL;Acc:A0A125YXQ6] | transcript_product=glycoprotein | location=TGGT1_chrX:6386376-6388397(+) | protein_length=283 | sequence_SO=chromosome | SO=protein_coding_gene | is_pseudo=false	0	FALSE	6.745	10	2	4	2	283	31.4	4.77	0	2	1.058	0.08	0.992903	1.01866e+06	1.07801e+06	50.66	11.23	2	2	1.48191e+06	700231	995531	1.16732e+06	1.39826e+06	700231	871013	716899	2	2	2	2	High	High	Peak Found	Peak Found	1
TGGT1_315620	transcript=TGGT1_315620-t26_1 | gene=TGGT1_315620 | organism=Toxoplasma_gondii_GT1 | gene_product=V-type proton ATPase subunit C [Source:UniProtKB/TrEMBL;Acc:S7W1K5] | transcript_product=putative vacuolar ATP synthase subunit C | location=TGGT1_chrXI:4802824-4804038(-) | protein_length=404 | sequence_SO=chromosome | SO=protein_coding_gene | is_pseudo=false	0.001	FALSE	3.177	2	1	2	1	404	46.1	6.28	0	1	1.058	0.08	0.992903	105060	111157	23.62	41.18	2	2	124353	88759.9	150028	82356.7	117333	88759.9	131263	50578.7	1	1	1	1	High	Peak Found	High	Peak Found	1
TGGT1_204380	transcript=TGGT1_204380-t26_1 | gene=TGGT1_204380 | organism=Toxoplasma_gondii_GT1 | gene_product=hypothetical protein | transcript_product=hypothetical protein | location=TGGT1_chrVIIa:1732949-1745124(-) | protein_length=3226 | sequence_SO=chromosome | SO=protein_coding_gene | is_pseudo=false	0	FALSE	9.599	1	3	5	3	3226	348.3	5.55	0	3	1.058	0.08	0.992903	825162	872909	28.26	9.48	2	2	1.01042e+06	673872	933542	816215	953383	673872	816778	501271	3	3	3	3	High	High	Peak Found	High	1
TGGT1_239560	transcript=TGGT1_239560-t26_1 | gene=TGGT1_239560 | organism=Toxoplasma_gondii_GT1 | gene_product=Myosin motor domain-containing protein [Source:UniProtKB/TrEMBL;Acc:S7URV6] | transcript_product=myosin E | location=TGGT1_chrVI:750607-761551(-) | protein_length=830 | sequence_SO=chromosome | SO=protein_coding_gene | is_pseudo=false	0	FALSE	28.695	15	10	24	10	830	93.1	7.28	8.78	10	1.058	0.08	0.992903	8.13583e+06	8.60427e+06	16.14	20.58	2	2	9.12366e+06	7.25494e+06	9.96277e+06	7.43102e+06	8.60866e+06	7.25494e+06	8.71666e+06	4.5637e+06	10	10	10	9	High	High	High	High	1
TGGT1_249900	transcript=TGGT1_249900-t26_1 | gene=TGGT1_249900 | organism=Toxoplasma_gondii_GT1 | gene_product=Putative adenine nucleotide translocator [Source:UniProtKB/TrEMBL;Acc:A0A125YLS5] | transcript_product=putative adenine nucleotide translocator | location=TGGT1_chrXII:4873424-4874380(+) | protein_length=318 | sequence_SO=chromosome | SO=protein_coding_gene | is_pseudo=false	0	FALSE	44.489	45	13	55	13	318	35.2	9.74	84.99	13	1.057	0.08	0.992903	4.72152e+07	4.99037e+07	16.63	25.95	2	2	5.31366e+07	4.19537e+07	6.00791e+07	4.14517e+07	5.01372e+07	4.19537e+07	5.25646e+07	2.54572e+07	13	13	13	13	High	High	High	High	1	Methylthio [C75; C176; C276]
TGGT1_240640	transcript=TGGT1_240640-t26_1 | gene=TGGT1_240640 | organism=Toxoplasma_gondii_GT1 | gene_product=Protein kinase domain-containing protein [Source:UniProtKB/TrEMBL;Acc:A0A125YXS9] | transcript_product=casein kinase I | location=TGGT1_chrVI:1321734-1325141(+) | protein_length=324 | sequence_SO=chromosome | SO=protein_coding_gene | is_pseudo=false	0.001	FALSE	4.461	3	1	3	1	324	37.9	9.13	2.01	1	1.056	0.08	0.992903	530968	560952	44.06	41.35	2	2	732845	384702	758126	415059	691479	384702	663302	254905	1	1	1	1	Peak Found	High	High	High	1
TGGT1_229640	transcript=TGGT1_229640-t26_1 | gene=TGGT1_229640 | organism=Toxoplasma_gondii_GT1 | gene_product=hypothetical protein | transcript_product=hypothetical protein | location=TGGT1_chrVIII:347644-355417(+) | protein_length=1289 | sequence_SO=chromosome | SO=protein_coding_gene | is_pseudo=false	0	FALSE	34.98	11	10	26	10	1289	137.3	7.77	25.67	10	1.054	0.08	0.992903	6.63841e+06	6.99897e+06	16.31	23.49	2	2	7.45371e+06	5.91229e+06	5.91868e+06	8.27645e+06	7.03297e+06	5.91229e+06	5.17839e+06	5.08291e+06	10	9	9	9	High	High	High	High	1
TGGT1_217460	transcript=TGGT1_217460-t26_1 | gene=TGGT1_217460 | organism=Toxoplasma_gondii_GT1 | gene_product=Glutaminyl-tRNA synthetase (GlnRS) [Source:UniProtKB/TrEMBL;Acc:S7V1H6] | transcript_product=glutaminyl-tRNA synthetase (GlnRS) | location=TGGT1_chrXII:1787579-1795013(-) | protein_length=860 | sequence_SO=chromosome | SO=protein_coding_gene | is_pseudo=false	0	FALSE	10.933	7	4	9	4	860	95.4	7.39	1.75	4	1.053	0.08	0.992903	917276	966261	47.39	1.53	2	2	1.29985e+06	647303	955873	976762	1.22647e+06	647303	836316	599870	4	4	4	4	High	High	High	High	1
TGGT1_216670	transcript=TGGT1_216670-t26_1 | gene=TGGT1_216670 | organism=Toxoplasma_gondii_GT1 | gene_product=FUSE-binding protein 2 / KH-type splicing regulatory protein [Source:UniProtKB/TrEMBL;Acc:S7VUJ0] | transcript_product=FUSE-binding protein 2 / KH-type splicing regulatory protein | location=TGGT1_chrXI:5891708-5895741(-) | protein_length=941 | sequence_SO=chromosome | SO=protein_coding_gene | is_pse…	0	FALSE	24.025	10	8	22	8	941	100	8.95	11.53	8	1.053	0.07	0.992903	2.05249e+06	2.16118e+06	37.87	10.95	2	2	2.70077e+06	1.55982e+06	1.99978e+06	2.3356e+06	2.54832e+06	1.55982e+06	1.74966e+06	1.43439e+06	8	8	7	8	High	High	High	High	1	Methylthio [C209]
TGGT1_232000	transcript=TGGT1_232000-t26_1 | gene=TGGT1_232000 | organism=Toxoplasma_gondii_GT1 | gene_product=hypothetical protein | transcript_product=hypothetical protein | location=TGGT1_chrVIII:1738722-1741055(+) | protein_length=637 | sequence_SO=chromosome | SO=protein_coding_gene | is_pseudo=false	0.023	FALSE	1.954	2	1	2	1	637	69.4	9	1.63	1	1.052	0.07	0.992903	635955	669257	26.82	39.42	2	2	770524	524887	891135	502623	727031	524887	779675	308682	1	1	1	1	High	High	Peak Found	Peak Found	1
TGGT1_285990	transcript=TGGT1_285990-t26_1 | gene=TGGT1_285990 | organism=Toxoplasma_gondii_GT1 | gene_product=Filamin/ABP280 repeat-containing protein [Source:UniProtKB/TrEMBL;Acc:S7UN36] | transcript_product=Filamin/ABP280 repeat-containing protein | location=TGGT1_chrV:1927197-1941478(+) | protein_length=1192 | sequence_SO=chromosome | SO=protein_coding_gene | is_pseudo=false	0	FALSE	18.713	8	6	11	6	1192	131	6.92	4.59	6	1.052	0.07	0.992903	2.45305e+06	2.58079e+06	5.96	9.03	2	2	2.55862e+06	2.35183e+06	2.75126e+06	2.42088e+06	2.4142e+06	2.35183e+06	2.40714e+06	1.48676e+06	6	6	6	6	High	High	High	High	1	Methylthio [C987]
TGGT1_263320	transcript=TGGT1_263320-t26_1 | gene=TGGT1_263320 | organism=Toxoplasma_gondii_GT1 | gene_product=hypothetical protein | transcript_product=hypothetical protein | location=TGGT1_chrVIIb:613192-614403(-) | protein_length=403 | sequence_SO=chromosome | SO=protein_coding_gene | is_pseudo=false	0	FALSE	18.582	15	5	15	5	403	42.1	12.21	18.43	5	1.051	0.07	0.992903	4.19912e+06	4.41443e+06	17.42	30.18	2	2	4.75252e+06	3.71016e+06	5.48275e+06	3.55428e+06	4.48426e+06	3.71016e+06	4.79699e+06	2.18283e+06	5	5	5	5	High	High	High	High	1
TGGT1_411760	transcript=TGGT1_411760-t26_1 | gene=TGGT1_411760 | organism=Toxoplasma_gondii_GT1 | gene_product=Actin [Source:UniProtKB/TrEMBL;Acc:S7VNC9] | transcript_product=actin | location=AAQM03000536:57-991(+) | protein_length=287 | sequence_SO=contig | SO=protein_coding_gene | is_pseudo=false	0	FALSE	97.379	41	14	326	13	287	32	6.04	500.54	14	1.05	0.07	0.992903	2.32448e+09	2.44134e+09	6.06	34.84	2	2	2.42625e+09	2226984329	1.89838e+09	3.13958e+09	2.2893e+09	2226984329	1.66094e+09	1.92814e+09	16	16	16	17	High	High	High	High	1	Phospho [S200]
TGGT1_230210	transcript=TGGT1_230210-t26_1 | gene=TGGT1_230210 | organism=Toxoplasma_gondii_GT1 | gene_product=Alveolin domain containing intermediate filament IMC10 [Source:UniProtKB/TrEMBL;Acc:S7WBA5] | transcript_product=alveolin domain containing intermediate filament IMC10 | location=TGGT1_chrVIII:682439-685345(+) | protein_length=560 | sequence_SO=chromosome | SO=protein_coding_gene | is_pseudo=false	0	FALSE	142.775	44	19	152	19	560	61.1	4.79	313.94	19	1.05	0.07	0.992903	3.0191e+08	3.17081e+08	7.06	12.5	2	2	2.87186e+08	3.17388e+08	2.90194e+08	3.46459e+08	2.70976e+08	3.17388e+08	2.53898e+08	2.12775e+08	21	22	21	21	High	High	High	High	1	Methylthio [C204]; Phospho [T402]
TGGT1_230350	transcript=TGGT1_230350-t26_1 | gene=TGGT1_230350 | organism=Toxoplasma_gondii_GT1 | gene_product=hypothetical protein | transcript_product=hypothetical protein | location=TGGT1_chrVIII:718292-730284(-) | protein_length=1254 | sequence_SO=chromosome | SO=protein_coding_gene | is_pseudo=false	0.025	FALSE	1.912	1	1	2	1	1254	139	6.11	0	1	1.048	0.07	0.992903	289537	303577	40.61	9.9	2	2	389053	215476	325622	283024	367092	215476	284894	173817	1	1	1	1	High	Peak Found	High	Peak Found	1
TGGT1_301440	transcript=TGGT1_301440-t26_1 | gene=TGGT1_301440 | organism=Toxoplasma_gondii_GT1 | gene_product=Calcium-dependent protein kinase CDPK1 [Source:UniProtKB/TrEMBL;Acc:S7UHK8] | transcript_product=calcium-dependent protein kinase CDPK1 | location=TGGT1_chrIV:2366836-2372193(+) | protein_length=582 | sequence_SO=chromosome | SO=protein_coding_gene | is_pseudo=false	0	FALSE	42.295	33	14	36	12	582	65.4	6.44	21.84	14	1.048	0.07	0.992903	8.38089e+06	8.78471e+06	30.41	40.36	2	2	1.0427e+07	6.73626e+06	1.17815e+07	6.55019e+06	9.83847e+06	6.73626e+06	1.03079e+07	4.02274e+06	12	12	12	10	High	High	High	High	1	Methylthio [C68]
TGGT1_233120	transcript=TGGT1_233120-t26_1 | gene=TGGT1_233120 | organism=Toxoplasma_gondii_GT1 | gene_product=AP2 domain transcription factor AP2VIII-2 [Source:UniProtKB/TrEMBL;Acc:S7V332] | transcript_product=AP2 domain transcription factor AP2VIII-2 | location=TGGT1_chrVIII:2426324-2433835(-) | protein_length=2503 | sequence_SO=chromosome | SO=protein_coding_gene | is_pseudo=false	0.053	FALSE	1.608	0	1	3	1	2503	256.5	8.16	0	1	1.048	0.07	0.992903	724302	758903	48.51	22.84	2	2	1.03554e+06	506608	893177	644815	977089	506608	781461	396008	1	1	1	1	High	High	High	Peak Found	1
TGGT1_304740	transcript=TGGT1_304740-t26_1 | gene=TGGT1_304740 | organism=Toxoplasma_gondii_GT1 | gene_product=Protein kinase domain-containing protein [Source:UniProtKB/TrEMBL;Acc:S7UUU5] | transcript_product=rhoptry kinase family protein ROP35 | location=TGGT1_chrVIIa:653060-656106(-) | protein_length=640 | sequence_SO=chromosome | SO=protein_coding_gene | is_pseudo=false	0	FALSE	23.98	15	8	17	8	640	71.2	7.78	22.36	8	1.047	0.07	0.992903	3.86556e+06	4.0462e+06	9.51	56.41	2	2	4.13481e+06	3.61384e+06	6.17239e+06	2.65241e+06	3.90142e+06	3.61384e+06	5.40037e+06	1.62896e+06	7	7	6	6	High	High	High	High	1
TGGT1_244560	transcript=TGGT1_244560-t26_1 | gene=TGGT1_244560 | organism=Toxoplasma_gondii_GT1 | gene_product=HATPase_c domain-containing protein [Source:UniProtKB/TrEMBL;Acc:S7VTT7] | transcript_product=putative heat shock protein 90 | location=TGGT1_chrVI:3273039-3276701(+) | protein_length=853 | sequence_SO=chromosome | SO=protein_coding_gene | is_pseudo=false	0	FALSE	112.752	37	27	105	27	853	97.5	5.03	122.84	27	1.046	0.06	0.992903	3.45456e+07	3.61257e+07	62.38	5.91	2	2	5.54707e+07	2.1514e+07	3.76672e+07	3.46473e+07	5.23396e+07	2.1514e+07	3.29559e+07	2.12783e+07	27	26	27	27	High	High	High	High	1	Methylthio [C549]
TGGT1_224700	transcript=TGGT1_224700-t26_1 | gene=TGGT1_224700 | organism=Toxoplasma_gondii_GT1 | gene_product=hypothetical protein | transcript_product=hypothetical protein | location=TGGT1_chrX:2774904-2782271(-) | protein_length=1678 | sequence_SO=chromosome | SO=protein_coding_gene | is_pseudo=false	0	FALSE	72.118	15	19	57	19	1678	182.5	9.57	81.75	19	1.044	0.06	0.992903	1.0905e+07	1.13883e+07	1.31	20.48	2	2	1.08043e+07	1.10067e+07	1.31766e+07	9.84271e+06	1.01945e+07	1.10067e+07	1.15285e+07	6.04482e+06	17	18	17	18	High	High	High	High	1	Methylthio [C1253; C1327]
TGGT1_238950	transcript=TGGT1_238950-t26_1 | gene=TGGT1_238950 | organism=Toxoplasma_gondii_GT1 | gene_product=FA_desaturase domain-containing protein [Source:UniProtKB/TrEMBL;Acc:S7VZX5] | transcript_product=putative fatty acyl-CoA desaturase | location=TGGT1_chrVI:327886-337165(-) | protein_length=1042 | sequence_SO=chromosome | SO=protein_coding_gene | is_pseudo=false	0	FALSE	9.856	3	3	9	3	1042	117.1	8.7	9.2	3	1.044	0.06	0.992903	847483	885026	37.38	50.54	2	2	1.11097e+06	646490	1.28628e+06	608941	1.04826e+06	646490	1.1254e+06	373976	3	3	3	3	High	High	High	High	1
TGGT1_259630	transcript=TGGT1_259630-t26_1 | gene=TGGT1_259630 | organism=Toxoplasma_gondii_GT1 | gene_product=hypothetical protein | transcript_product=hypothetical protein | location=TGGT1_chrVIIb:2722823-2724032(+) | protein_length=160 | sequence_SO=chromosome | SO=protein_coding_gene | is_pseudo=false	0	FALSE	75.192	49	7	379	7	160	18.3	5.1	711.94	7	1.044	0.06	0.992903	1.61499e+08	1.68624e+08	3.63	10.15	2	2	1.65695e+08	1.5741e+08	1.5693e+08	1.8119e+08	1.56343e+08	1.5741e+08	1.37302e+08	1.11276e+08	13	13	13	13	High	High	High	High	1	Phospho [T24; T27; T28; T40; T74]
TGGT1_223000	transcript=TGGT1_223000-t26_1 | gene=TGGT1_223000 | organism=Toxoplasma_gondii_GT1 | gene_product=Dynein light chain [Source:UniProtKB/TrEMBL;Acc:S7UL29] | transcript_product=dynein light chain DLC | location=TGGT1_chrII:1350278-1351342(+) | protein_length=138 | sequence_SO=chromosome | SO=protein_coding_gene | is_pseudo=false	0	FALSE	6.617	16	1	6	1	138	16	8.46	9.53	1	1.044	0.06	0.992903	1.91199e+06	1.99553e+06	13.27	14.64	2	2	1.74021e+06	2.10073e+06	1.79863e+06	2.21398e+06	1.64198e+06	2.10073e+06	1.57367e+06	1.3597e+06	1	1	1	1	High	High	High	High	1	Methylthio [C73]
TGGT1_261520	transcript=TGGT1_261520-t26_1 | gene=TGGT1_261520 | organism=Toxoplasma_gondii_GT1 | gene_product=OBG-type G domain-containing protein [Source:UniProtKB/TrEMBL;Acc:S7UYA0] | transcript_product=putative nucleolar GTP-binding protein 1 | location=TGGT1_chrVIIb:1646922-1654757(-) | protein_length=719 | sequence_SO=chromosome | SO=protein_coding_gene | is_pseudo=false	0.001	FALSE	5.491	4	2	3	2	719	80.9	9.7	0	2	1.043	0.06	0.992903	204613	213331	2.67	38.02	2	2	208513	200786	281025	161944	196743	200786	245875	99456.3	1	1	1	1	High	High	High	Peak Found	1
TGGT1_263070	transcript=TGGT1_263070-t26_1 | gene=TGGT1_263070 | organism=Toxoplasma_gondii_GT1 | gene_product=Protein kinase domain-containing protein [Source:UniProtKB/TrEMBL;Acc:S7WDT1] | transcript_product=CMGC kinase, CK2 family | location=TGGT1_chrVIIb:801033-806072(+) | protein_length=539 | sequence_SO=chromosome | SO=protein_coding_gene | is_pseudo=false	0	FALSE	19.232	13	6	11	6	539	59.8	9.07	6.4	6	1.043	0.06	0.992903	2.57725e+06	2.68697e+06	29.48	22.27	2	2	3.18451e+06	2.08579e+06	3.14932e+06	2.29249e+06	3.00475e+06	2.08579e+06	2.75541e+06	1.40791e+06	6	6	6	6	High	High	High	High	1	Methylthio [C504]
TGGT1_273760	transcript=TGGT1_273760-t26_1 | gene=TGGT1_273760 | organism=Toxoplasma_gondii_GT1 | gene_product=Heat shock protein HSP70 [Source:UniProtKB/TrEMBL;Acc:A0A125YP12] | transcript_product=heat shock protein HSP70 | location=TGGT1_chrVIII:3285695-3287698(-) | protein_length=667 | sequence_SO=chromosome | SO=protein_coding_gene | is_pseudo=false	0	FALSE	75.876	28	16	94	15	667	72.2	5.2	168.46	16	1.04	0.06	0.992903	5.85859e+07	6.09555e+07	5.28	0.02	2	2	6.08146e+07	5.64389e+07	6.09659e+07	6.09451e+07	5.73818e+07	5.64389e+07	5.33405e+07	3.74289e+07	15	15	15	15	High	High	High	High	1	Methylthio [C242; C308; C548; C605]
TGGT1_294550	transcript=TGGT1_294550-t26_1 | gene=TGGT1_294550 | organism=Toxoplasma_gondii_GT1 | gene_product=Dynein heavy chain [Source:UniProtKB/TrEMBL;Acc:S7VWW7] | transcript_product=dynein heavy chain | location=TGGT1_chrIa:919161-949027(+) | protein_length=4974 | sequence_SO=chromosome | SO=protein_coding_gene | is_pseudo=false	0.008	FALSE	2.287	0	1	4	1	4974	558.3	5.73	7.73	1	1.04	0.06	0.992903	886937	922647	14.52	8.84	2	2	983187	800109	982239	866671	927690	800109	859384	532259	1	1	1	1	High	High	High	High	1
TGGT1_219070	transcript=TGGT1_219070-t26_1 | gene=TGGT1_219070 | organism=Toxoplasma_gondii_GT1 | gene_product=Cyclic nucleotide-binding domain-containing protein [Source:UniProtKB/TrEMBL;Acc:S7V252] | transcript_product=cyclic nucleotide-binding domain-containing protein | location=TGGT1_chrXII:1082059-1109501(-) | protein_length=2764 | sequence_SO=chromosome | SO=protein_coding_gene | is_pseudo=false	0.001	FALSE	5.409	1	2	4	2	2764	313.6	5.33	0	2	1.039	0.06	0.992903	1.11145e+06	1.15526e+06	14.53	16.06	2	2	1.23216e+06	1.00256e+06	1.03073e+06	1.29484e+06	1.16261e+06	1.00256e+06	901814	795216	2	2	2	2	High	Peak Found	High	High	1
TGGT1_360830	transcript=TGGT1_360830-t26_1 | gene=TGGT1_360830 | organism=Toxoplasma_gondii_GT1 | gene_product=Nucleoside-triphosphatase [Source:UniProtKB/TrEMBL;Acc:S7UZG2] | transcript_product=nucleoside-triphosphatase | location=AAQM03000066:41-1153(+) | protein_length=370 | sequence_SO=contig | SO=protein_coding_gene | is_pseudo=false	0	FALSE	48.883	35	11	39	2	370	40.5	5.22	37.05	11	1.039	0.06	0.992903	1.16452e+06	1.20986e+06	15.48	8.34	2	2	1.0433e+06	1.29983e+06	1.14052e+06	1.28343e+06	984410	1.29983e+06	997864	788207	1	2	1	2	High	High	High	High	1	Methylthio [C107; C155; C268; C300]
TGGT1_291020	transcript=TGGT1_291020-t26_1 | gene=TGGT1_291020 | organism=Toxoplasma_gondii_GT1 | gene_product=Myosin motor domain-containing protein [Source:UniProtKB/TrEMBL;Acc:S7UQ36] | transcript_product=myosin head (motor domain) domain-containing protein | location=TGGT1_chrIX:3855898-3879295(-) | protein_length=2484 | sequence_SO=chromosome | SO=protein_coding_gene | is_pseudo=false	0	FALSE	9.857	2	5	8	5	2484	277.7	9.47	1.64	5	1.039	0.05	0.992903	2.39216e+06	2.48485e+06	28.87	20.27	2	2	1.9448e+06	2.94241e+06	2.15095e+06	2.8706e+06	1.83502e+06	2.94241e+06	1.88191e+06	1.76295e+06	5	5	5	5	High	High	High	Peak Found	1
TGGT1_227930	transcript=TGGT1_227930-t26_1 | gene=TGGT1_227930 | organism=Toxoplasma_gondii_GT1 | gene_product=hypothetical protein | transcript_product=hypothetical protein | location=TGGT1_chrX:638021-643944(-) | protein_length=1554 | sequence_SO=chromosome | SO=protein_coding_gene | is_pseudo=false	0.047	FALSE	1.693	1	1	1	1	1554	169.5	8.51	0	1	1.038	0.05	0.992903	207029	214832	60.98	23.53	2	2	328385	130521	254125	181614	309849	130521	222340	111537	1	1	1	1	Peak Found	Peak Found	Peak Found	High	1
TGGT1_270320	transcript=TGGT1_270320-t26_1 | gene=TGGT1_270320 | organism=Toxoplasma_gondii_GT1 | gene_product=PPM-type phosphatase domain-containing protein [Source:UniProtKB/TrEMBL;Acc:A0A125YP66] | transcript_product=protein phosphatase 2C domain-containing protein | location=TGGT1_chrVIII:5274953-5280379(+) | protein_length=538 | sequence_SO=chromosome | SO=protein_coding_gene | is_pseudo=false	0	FALSE	44.799	28	11	32	11	538	58.7	5.08	38.27	11	1.037	0.05	0.992903	5.25174e+06	5.44806e+06	38.98	69.21	2	2	6.96927e+06	3.95748e+06	9.30479e+06	3.1899e+06	6.57588e+06	3.95748e+06	8.14098e+06	1.95905e+06	11	10	11	10	High	High	High	High	1	Methylthio [C223]
TGGT1_258060	transcript=TGGT1_258060-t26_1 | gene=TGGT1_258060 | organism=Toxoplasma_gondii_GT1 | gene_product=Putative myosin heavy chain [Source:UniProtKB/TrEMBL;Acc:S7W7F1] | transcript_product=putative myosin heavy chain | location=TGGT1_chrVIIb:3580390-3584438(+) | protein_length=208 | sequence_SO=chromosome | SO=protein_coding_gene | is_pseudo=false	0	FALSE	7.618	13	2	3	2	208	23.3	8.7	2.48	2	1.037	0.05	0.992903	293603	304389	73.64	26.25	2	2	522977	164831	252271	367273	493457	164831	220718	225558	2	2	2	2	High	Peak Found	Peak Found	High	1
TGGT1_273090	transcript=TGGT1_273090-t26_1 | gene=TGGT1_273090 | organism=Toxoplasma_gondii_GT1 | gene_product=Cell division protein CDC48CY [Source:UniProtKB/TrEMBL;Acc:A0A125YX44] | transcript_product=cell division protein CDC48CY | location=TGGT1_chrVIII:3661986-3671254(-) | protein_length=811 | sequence_SO=chromosome | SO=protein_coding_gene | is_pseudo=false	0	FALSE	17.115	9	6	20	6	811	89.3	5.11	5.87	6	1.036	0.05	0.992903	1.78483e+06	1.84994e+06	11.15	14.05	2	2	1.93163e+06	1.64919e+06	1.67441e+06	2.04387e+06	1.82259e+06	1.64919e+06	1.46498e+06	1.25523e+06	6	6	6	6	High	High	High	High	1	Methylthio [C528]
TGGT1_260540	transcript=TGGT1_260540-t26_1 | gene=TGGT1_260540 | organism=Toxoplasma_gondii_GT1 | gene_product=Alveolin domain containing intermediate filament IMC14 [Source:UniProtKB/TrEMBL;Acc:S7UYY7] | transcript_product=alveolin domain containing intermediate filament IMC14 | location=TGGT1_chrVIIb:2144399-2148137(+) | protein_length=733 | sequence_SO=chromosome | SO=protein_coding_gene | is_pseudo=false	0	FALSE	157.717	45	24	174	24	733	83.3	8.44	288.75	24	1.036	0.05	0.992903	1.28665e+08	1.33316e+08	2.05	3.22	2	2	1.26813e+08	1.30544e+08	1.30319e+08	1.36382e+08	1.19655e+08	1.30544e+08	1.14019e+08	8.37582e+07	25	25	25	25	High	High	High	High	1	Methylthio [C378; C425; C430; C504; C591; C669; C675]
TGGT1_286420A	transcript=TGGT1_286420A-t26_1 | gene=TGGT1_286420A | organism=Toxoplasma_gondii_GT1 | gene_product=Elongation factor 1-alpha [Source:UniProtKB/TrEMBL;Acc:S7W358] | transcript_product=putative elongation factor 1-alpha (EF-1-ALPHA) | location=TGGT1_chrV:1692242-1694172(-) | protein_length=448 | sequence_SO=chromosome | SO=protein_coding_gene | is_pseudo=false	0	FALSE	107.242	54	18	260	18	448	49.5	8.78	252.27	18	1.036	0.05	0.992903	3.37496e+08	3.49492e+08	40.76	34.33	2	2	4.54041e+08	2.50866e+08	4.47718e+08	2.72816e+08	4.28412e+08	2.50866e+08	3.91719e+08	1.67548e+08	18	19	18	19	High	High	High	High	1	Methylthio [C158; C275; C323; C349; C356]
TGGT1_267080	transcript=TGGT1_267080-t26_1 | gene=TGGT1_267080 | organism=Toxoplasma_gondii_GT1 | gene_product=AAA domain-containing protein [Source:UniProtKB/TrEMBL;Acc:A0A125YSZ9] | transcript_product=putative 26S protease regulatory subunit 4 | location=TGGT1_chrIX:625144-630490(+) | protein_length=441 | sequence_SO=chromosome | SO=protein_coding_gene | is_pseudo=false	0.001	FALSE	3.681	5	2	4	1	441	49.1	6.42	3.7	2	1.035	0.05	0.992903	2.53734e+06	2.62709e+06	27.09	35.5	2	2	3.0805e+06	2.08994e+06	3.39516e+06	2.03278e+06	2.90662e+06	2.08994e+06	2.97051e+06	1.24841e+06	1	1	1	1	High	High	Peak Found	High	1
TGGT1_410370	transcript=TGGT1_410370-t26_1 | gene=TGGT1_410370 | organism=Toxoplasma_gondii_GT1 | gene_product=Putative transmembrane protein [Source:UniProtKB/TrEMBL;Acc:S7VU98] | transcript_product=putative transmembrane protein | location=AAQM03000265:733-2584(+) | protein_length=435 | sequence_SO=contig | SO=protein_coding_gene | is_pseudo=false	0	FALSE	67.188	43	15	56	4	435	47.7	9.19	93.51	15	1.035	0.05	0.992903	2.55592e+06	2.64424e+06	15.93	61.61	2	2	2.86209e+06	2.2825e+06	4.21736e+06	1.65792e+06	2.70053e+06	2.2825e+06	3.68986e+06	1.0182e+06	4	4	4	4	High	High	High	High	1
TGGT1_290950	transcript=TGGT1_290950-t26_1 | gene=TGGT1_290950 | organism=Toxoplasma_gondii_GT1 | gene_product=Clathrin heavy chain [Source:UniProtKB/TrEMBL;Acc:A0A125YSB0] | transcript_product=putative clathrin heavy chain | location=TGGT1_chrIX:3770246-3782423(-) | protein_length=1731 | sequence_SO=chromosome | SO=protein_coding_gene | is_pseudo=false	0	FALSE	53.325	12	16	42	16	1731	194.4	6.06	29.11	16	1.034	0.05	0.992903	6.93663e+06	7.17393e+06	37.26	20.25	2	2	9.08509e+06	5.29624e+06	8.28638e+06	6.21083e+06	8.57227e+06	5.29624e+06	7.24995e+06	3.81433e+06	15	15	15	15	High	High	High	High	1
TGGT1_204400	transcript=TGGT1_204400-t26_1 | gene=TGGT1_204400 | organism=Toxoplasma_gondii_GT1 | gene_product=ATP synthase subunit alpha [Source:UniProtKB/TrEMBL;Acc:S7UU80] | transcript_product=putative ATPase synthase subunit alpha | location=TGGT1_chrVIIa:1716199-1723634(+) | protein_length=577 | sequence_SO=chromosome | SO=protein_coding_gene | is_pseudo=false	0	FALSE	27.001	14	9	28	9	577	62.1	8.37	29.1	9	1.034	0.05	0.992903	1.91531e+07	1.98031e+07	41.88	28.19	2	2	2.59914e+07	1.4114e+07	2.42375e+07	1.61801e+07	2.45243e+07	1.4114e+07	2.12059e+07	9.93687e+06	8	7	8	8	High	High	High	High	1	Methylthio [C203]
TGGT1_260240	transcript=TGGT1_260240-t26_1 | gene=TGGT1_260240 | organism=Toxoplasma_gondii_GT1 | gene_product=Ccr4-associated factor family protein [Source:UniProtKB/TrEMBL;Acc:S7UY95] | transcript_product=ccr4-associated factor family protein | location=TGGT1_chrVIIb:2404604-2407464(+) | protein_length=617 | sequence_SO=chromosome | SO=protein_coding_gene | is_pseudo=false	0.023	FALSE	1.929	3	1	1	1	617	64.2	6.01	0	1	1.033	0.05	0.992903	148550	153461	17	49.91	2	2	167621	131649	221894	106134	158159	131649	194140	65181	1	1	1	1	Peak Found	Peak Found	High	Peak Found	1
TGGT1_316120	transcript=TGGT1_316120-t26_1 | gene=TGGT1_316120 | organism=Toxoplasma_gondii_GT1 | gene_product=OBG-type G domain-containing protein [Source:UniProtKB/TrEMBL;Acc:S7VUX4] | transcript_product=hypothetical protein | location=TGGT1_chrXI:5083687-5086641(+) | protein_length=984 | sequence_SO=chromosome | SO=protein_coding_gene | is_pseudo=false	0.047	FALSE	1.698	1	1	3	1	984	105.8	8.07	0	1	1.033	0.05	0.992903	4.65162e+06	4.80338e+06	68.96	20.13	2	2	7.92596e+06	2.72996e+06	5.54372e+06	4.1619e+06	7478569	2.72996e+06	4.85033e+06	2.556e+06	1	1	1	1	Peak Found	High	High	High	1
TGGT1_205350	transcript=TGGT1_205350-t26_1 | gene=TGGT1_205350 | organism=Toxoplasma_gondii_GT1 | gene_product=Elongation of fatty acids protein [Source:UniProtKB/TrEMBL;Acc:A0A125YTU7] | transcript_product=putative integral membrane protein, GNS1/SUR4 family protein | location=TGGT1_chrVIIa:1373006-1374809(-) | protein_length=318 | sequence_SO=chromosome | SO=protein_coding_gene | is_pseudo=false	0	FALSE	12.812	18	4	13	4	318	37.8	9.03	3.7	4	1.032	0.05	0.992903	1.10064e+06	1.13594e+06	47.1	60.93	2	2	1.55602e+06	778533	1.8011e+06	716424	1.46819e+06	778533	1.57583e+06	439986	4	4	4	4	High	High	High	High	1
TGGT1_239490	transcript=TGGT1_239490-t26_1 | gene=TGGT1_239490 | organism=Toxoplasma_gondii_GT1 | gene_product=2-oxoisovalerate dehydrogenase subunit alpha [Source:UniProtKB/TrEMBL;Acc:S7W6J0] | transcript_product=dehydrogenase E1 component family protein | location=TGGT1_chrVI:705091-710904(-) | protein_length=571 | sequence_SO=chromosome | SO=protein_coding_gene | is_pseudo=false	0	FALSE	11.531	7	3	7	3	571	63.9	8.46	6.4	3	1.032	0.05	0.992903	760985	785344	54.67	14.01	2	2	1.14414e+06	506141	867432	711024	1079562	506141	758937	436670	3	3	3	3	High	High	High	High	1
TGGT1_223420	transcript=TGGT1_223420-t26_1 | gene=TGGT1_223420 | organism=Toxoplasma_gondii_GT1 | gene_product=J domain-containing protein [Source:UniProtKB/TrEMBL;Acc:S7UVP6] | transcript_product=DnaJ domain-containing protein | location=TGGT1_chrX:3760673-3762245(-) | protein_length=383 | sequence_SO=chromosome | SO=protein_coding_gene | is_pseudo=false	0.001	FALSE	4.468	5	2	6	2	383	42.2	6.11	0	2	1.032	0.05	0.992903	481283	496678	21.66	19.89	2	2	561618	412439	572206	431120	529917	412439	500636	264769	2	2	2	2	High	High	High	Peak Found	1	Biotin [K94]; Methylthio [C90]
TGGT1_216000	transcript=TGGT1_216000-t26_1 | gene=TGGT1_216000 | organism=Toxoplasma_gondii_GT1 | gene_product=Alveolin domain containing intermediate filament IMC3 [Source:UniProtKB/TrEMBL;Acc:A0A125YIN0] | transcript_product=alveolin domain containing intermediate filament IMC3 | location=TGGT1_chrXI:6395592-6397208(+) | protein_length=538 | sequence_SO=chromosome | SO=protein_coding_gene | is_pseudo=false	0	FALSE	185.829	38	14	188	14	538	58	5.34	461.22	14	1.032	0.04	0.992903	6.81288e+08	7.02854e+08	14.87	5.38	2	2	6.13037e+08	7.57137e+08	6.76621e+08	7.30104e+08	5.78433e+08	7.57137e+08	5.91992e+08	4.48387e+08	20	21	21	21	High	High	High	High	1	Phospho [S297; S330; S332; S338; S341; S343; S351; T360; S485]; Methylthio [C521]
TGGT1_244110	transcript=TGGT1_244110-t26_1 | gene=TGGT1_244110 | organism=Toxoplasma_gondii_GT1 | gene_product=Nucleosome assembly protein (Nap) protein [Source:UniProtKB/TrEMBL;Acc:S7UG11] | transcript_product=nucleosome assembly protein (nap) protein | location=TGGT1_chrVI:2942300-2948890(+) | protein_length=738 | sequence_SO=chromosome | SO=protein_coding_gene | is_pseudo=false	0.001	FALSE	4.72	5	2	5	2	738	83.9	8.6	0	2	1.032	0.04	0.992903	538243	555238	26.82	46.14	2	2	652150	444231	395736	779027	615339	444231	346239	478433	2	2	2	2	High	High	Peak Found	High	1
TGGT1_411470	transcript=TGGT1_411470-t26_1 | gene=TGGT1_411470 | organism=Toxoplasma_gondii_GT1 | gene_product=Putative transmembrane protein [Source:UniProtKB/TrEMBL;Acc:S7UG13] | transcript_product=putative transmembrane protein | location=AAQM03000493:218-1321(-) | protein_length=367 | sequence_SO=contig | SO=protein_coding_gene | is_pseudo=false	0	FALSE	47.15	31	10	37	1	367	40.3	7.44	62.34	10	1.031	0.04	0.992903	536241	553124	22.39	69.26	2	2	629090	457096	945124	323710	593581	457096	826912	198804	1	1	1	1	High	High	High	Peak Found	1
TGGT1_219280	transcript=TGGT1_219280-t26_1 | gene=TGGT1_219280 | organism=Toxoplasma_gondii_GT1 | gene_product=Actin like protein ALP1 [Source:UniProtKB/TrEMBL;Acc:A0A125YSC0] | transcript_product=actin like protein ALP1 | location=TGGT1_chrXII:936313-942608(-) | protein_length=414 | sequence_SO=chromosome | SO=protein_coding_gene | is_pseudo=false	0.007	FALSE	2.434	2	1	1	1	414	46.1	5.1	0	1	1.031	0.04	0.992903	266372	274538	42.37	28.55	2	2	362851	195546	336892	223725	342369	195546	294755	137399	1	1	1	1	High	Peak Found	Peak Found	Peak Found	1
TGGT1_294390	transcript=TGGT1_294390-t26_1 | gene=TGGT1_294390 | organism=Toxoplasma_gondii_GT1 | gene_product=Putative myosin light chain MLC4 [Source:UniProtKB/TrEMBL;Acc:S7VR42] | transcript_product=putative myosin light chain MLC4 | location=TGGT1_chrIa:859360-862302(-) | protein_length=172 | sequence_SO=chromosome | SO=protein_coding_gene | is_pseudo=false	0.001	FALSE	3.942	10	1	1	1	172	19.7	8.07	0	1	1.03	0.04	0.992903	174542	179850	6.24	NA	2	1	182423	167001	179850	NA	172126	167001	157355	NA	1	1	1	NA	Peak Found	High	Peak Found	Not Found	1
TGGT1_290920	transcript=TGGT1_290920-t26_1 | gene=TGGT1_290920 | organism=Toxoplasma_gondii_GT1 | gene_product=Fe2OG dioxygenase domain-containing protein [Source:UniProtKB/TrEMBL;Acc:S7UPA3] | transcript_product=oxidoreductase, 2OG-Fe(II) oxygenase family protein | location=TGGT1_chrIX:3746594-3750759(+) | protein_length=967 | sequence_SO=chromosome | SO=protein_coding_gene | is_pseudo=false	0	FALSE	18.471	10	5	10	5	967	100.8	9.41	7.33	5	1.03	0.04	0.993353	1.44753e+06	1.49036e+06	8.83	11.72	2	2	1.54087e+06	1.35984e+06	1.37156e+06	1.61945e+06	1.45389e+06	1.35984e+06	1.20001e+06	994569	5	4	5	5	High	High	High	High	1	Methylthio [C497]
TGGT1_311310	transcript=TGGT1_311310-t26_1 | gene=TGGT1_311310 | organism=Toxoplasma_gondii_GT1 | gene_product=Serine/threonine-protein phosphatase [Source:UniProtKB/TrEMBL;Acc:A0A125YWN7] | transcript_product=protein phosphatase 2B catalytic subunit, calcineurin family phosphatse superfamily protein | location=TGGT1_chrXI:1924815-1932057(-) | protein_length=501 | sequence_SO=chromosome | SO=protein_coding_ge…	0.048	FALSE	1.677	3	1	1	1	501	56.4	5.43	0	1	1.029	0.04	0.993961	199993	205766	17.8	34.09	2	2	226967	176224	263119	160915	214156	176224	230209	98824.8	1	1	1	1	Peak Found	High	Peak Found	Peak Found	1
TGGT1_237220	transcript=TGGT1_237220-t26_1 | gene=TGGT1_237220 | organism=Toxoplasma_gondii_GT1 | gene_product=DNA replication licensing factor MCM7 [Source:UniProtKB/TrEMBL;Acc:S7UQY5] | transcript_product=putative DNA replication licensing factor Mcm7 | location=TGGT1_chrX:5679145-5687290(+) | protein_length=865 | sequence_SO=chromosome | SO=protein_coding_gene | is_pseudo=false	0.001	FALSE	3.353	3	2	3	2	865	96.8	6.93	0	2	1.029	0.04	0.993961	242972	249960	32.77	42.31	2	2	307657	191887	340318	183593	290291	191887	297752	112752	1	1	1	1	Peak Found	High	High	Peak Found	1
TGGT1_310970	transcript=TGGT1_310970-t26_1 | gene=TGGT1_310970 | organism=Toxoplasma_gondii_GT1 | gene_product=hypothetical protein | transcript_product=hypothetical protein | location=TGGT1_chrXI:1663685-1680841(+) | protein_length=3415 | sequence_SO=chromosome | SO=protein_coding_gene | is_pseudo=false	0.063	FALSE	1.497	0	1	1	1	3415	370.4	9.63	0	1	1.028	0.04	0.99426	281155	289126	84.44	43.27	2	2	559750	141221	396615	210768	528154	141221	347008	129442	1	1	1	1	High	Peak Found	Peak Found	Peak Found	1
TGGT1_305860	transcript=TGGT1_305860-t26_1 | gene=TGGT1_305860 | organism=Toxoplasma_gondii_GT1 | gene_product=Calcium-dependent protein kinase CDPK3 [Source:UniProtKB/TrEMBL;Acc:A0A125YQG3] | transcript_product=calcium-dependent protein kinase CDPK3 | location=TGGT1_chrIX:5409701-5417293(+) | protein_length=537 | sequence_SO=chromosome | SO=protein_coding_gene | is_pseudo=false	0	FALSE	8.427	8	4	9	2	537	60.4	6.4	1.78	4	1.027	0.04	0.994751	319353	328126	49.05	17.41	2	2	458578	222397	371336	289945	432693	222397	324890	178067	2	2	2	2	High	Peak Found	High	Peak Found	1
TGGT1_239350	transcript=TGGT1_239350-t26_1 | gene=TGGT1_239350 | organism=Toxoplasma_gondii_GT1 | gene_product=RAP domain-containing protein [Source:UniProtKB/TrEMBL;Acc:S7W6K2] | transcript_product=RAP domain-containing protein | location=TGGT1_chrVI:563532-576605(-) | protein_length=2755 | sequence_SO=chromosome | SO=protein_coding_gene | is_pseudo=false	0.053	FALSE	1.597	0	1	1	1	2755	297.5	7.68	0	1	1.026	0.04	0.995017	668066	685336	39.32	35.31	2	2	888843	502127	884458	531043	838671	502127	773833	326136	1	1	1	1	Peak Found	Peak Found	Peak Found	High	1
TGGT1_274060	transcript=TGGT1_274060-t26_1 | gene=TGGT1_274060 | organism=Toxoplasma_gondii_GT1 | gene_product=2-oxoglutarate/malate translocase OMT [Source:UniProtKB/TrEMBL;Acc:S7V4E3] | transcript_product=2-oxoglutarate/malate translocase OMT | location=TGGT1_chrVIII:3043521-3046134(+) | protein_length=323 | sequence_SO=chromosome | SO=protein_coding_gene | is_pseudo=false	0	FALSE	11.054	11	4	13	4	323	35	9.77	17.22	4	1.026	0.04	0.995017	3.81057e+06	3.90859e+06	26.45	34.33	2	2	4.60444e+06	3.15357e+06	5.00702e+06	3.05113e+06	4.34453e+06	3.15357e+06	4.38076e+06	1.87383e+06	4	4	4	4	High	High	High	High	1
TGGT1_318710	transcript=TGGT1_318710-t26_1 | gene=TGGT1_318710 | organism=Toxoplasma_gondii_GT1 | gene_product=ATP-binding cassette sub-family F member 1 [Source:UniProtKB/TrEMBL;Acc:A0A125YVQ3] | transcript_product=ATP-binding cassette sub-family F member 1 | location=TGGT1_chrIV:1070737-1079983(+) | protein_length=811 | sequence_SO=chromosome | SO=protein_coding_gene | is_pseudo=false	0.001	FALSE	4.721	2	1	2	1	811	89.1	5.91	4.13	1	1.026	0.04	0.995017	167154	171430	4.51	NA	2	1	172568	161910	171430	NA	162827	161910	149988	NA	1	1	1	NA	High	Peak Found	Peak Found	High	1
TGGT1_214880	transcript=TGGT1_214880-t26_1 | gene=TGGT1_214880 | organism=Toxoplasma_gondii_GT1 | gene_product=hypothetical protein | transcript_product=hypothetical protein | location=TGGT1_chrX:6454346-6458141(-) | protein_length=931 | sequence_SO=chromosome | SO=protein_coding_gene | is_pseudo=false	0	FALSE	115.436	30	21	92	21	931	98.1	7.24	154.85	21	1.025	0.04	0.995017	4.33029e+07	4.43984e+07	4.15	19.68	2	2	4.45916e+07	4.20514e+07	3.85953e+07	5.10741e+07	4.20746e+07	4.20514e+07	3.37679e+07	3.13668e+07	19	20	19	22	High	High	High	High	1	Methylthio [C346; C512; C683]; Phospho [T717]
TGGT1_236890	transcript=TGGT1_236890-t26_1 | gene=TGGT1_236890 | organism=Toxoplasma_gondii_GT1 | gene_product=hypothetical protein | transcript_product=hypothetical protein | location=TGGT1_chrX:5457347-5458367(-) | protein_length=218 | sequence_SO=chromosome | SO=protein_coding_gene | is_pseudo=false	0.047	FALSE	1.688	5	1	1	1	218	24.6	6.57	0	1	1.024	0.03	0.997085	3.44664e+06	3.52926e+06	8.12	7.59	2	2	3.65058e+06	3.25408e+06	3.72405e+06	3.34466e+06	3.44452e+06	3.25408e+06	3.25826e+06	2.05409e+06	1	1	1	1	Peak Found	Peak Found	High	Peak Found	1
TGGT1_233460	transcript=TGGT1_233460-t26_1 | gene=TGGT1_233460 | organism=Toxoplasma_gondii_GT1 | gene_product=SAG-related sequence SRS29B [Source:UniProtKB/TrEMBL;Acc:A0A125YG48] | transcript_product=SAG-related sequence SRS29B | location=TGGT1_chrVIII:2660455-2661465(+) | protein_length=336 | sequence_SO=chromosome | SO=protein_coding_gene | is_pseudo=false	0	FALSE	63.036	49	12	76	12	336	34.8	8.02	169.8	12	1.022	0.03	0.997939	9.80532e+07	1.00234e+08	77.04	41.9	2	2	1.80619e+08	5.32304e+07	7.38504e+07	1.36044e+08	1.70424e+08	5.32304e+07	6.46135e+07	8.35502e+07	11	11	11	11	High	High	High	High	1	Methylthio [C102; C110; C161; C190; C215; C285]
TGGT1_290870	transcript=TGGT1_290870-t26_1 | gene=TGGT1_290870 | organism=Toxoplasma_gondii_GT1 | gene_product=SSD domain-containing protein [Source:UniProtKB/TrEMBL;Acc:S7UP99] | transcript_product=patched family protein | location=TGGT1_chrIX:3712274-3716877(+) | protein_length=1178 | sequence_SO=chromosome | SO=protein_coding_gene | is_pseudo=false	0.061	FALSE	1.534	1	1	3	1	1178	130.4	6.35	0	1	1.021	0.03	0.997939	1.16515e+06	1.19003e+06	45.72	25.44	2	2	1.6293e+06	833227	1.42741e+06	992125	1.53733e+06	833227	1.24887e+06	609305	1	1	1	1	High	High	Peak Found	High	1
TGGT1_231640	transcript=TGGT1_231640-t26_1 | gene=TGGT1_231640 | organism=Toxoplasma_gondii_GT1 | gene_product=Alveolin domain containing intermediate filament IMC1 [Source:UniProtKB/TrEMBL;Acc:A0A125YFV6] | transcript_product=alveolin domain containing intermediate filament IMC1 | location=TGGT1_chrVIII:1511977-1514752(+) | protein_length=609 | sequence_SO=chromosome | SO=protein_coding_gene | is_pseudo=false	0	FALSE	288.096	54	33	496	33	609	69.6	5.19	940.16	33	1.021	0.03	0.997939	2.42171e+09	2.47156e+09	2.08	0.16	2	2	2.45766e+09	2.38629e+09	2.47435e+09	2.46877e+09	2.31893e+09	2.38629e+09	2.16487e+09	1.51617e+09	37	42	38	42	High	High	High	High	1	Phospho [T34; S35; S37; T62; S65; S68; T80; T518; T520; T521; Y525; T526]; Methylthio [C5; C9; C12; C13; C389; C407]
TGGT1_218720	transcript=TGGT1_218720-t26_1 | gene=TGGT1_218720 | organism=Toxoplasma_gondii_GT1 | gene_product=Calcium-dependent protein kinase CDPK6 [Source:UniProtKB/TrEMBL;Acc:S7V1C9] | transcript_product=calcium-dependent protein kinase CDPK6 | location=TGGT1_chrXII:1292458-1303855(+) | protein_length=1477 | sequence_SO=chromosome | SO=protein_coding_gene | is_pseudo=false	0	FALSE	65.28	16	16	50	16	1477	160.6	8.76	50.05	16	1.02	0.03	0.997939	1.06856e+07	1.08994e+07	18.53	6.75	2	2	1.21906e+07	9.36636e+06	1.03914e+07	1.14323e+07	1.15024e+07	9.36636e+06	9.09167e+06	7.02107e+06	14	16	14	16	High	High	High	High	1	Methylthio [C1434]
TGGT1_217680	transcript=TGGT1_217680-t26_1 | gene=TGGT1_217680 | organism=Toxoplasma_gondii_GT1 | gene_product=hypothetical protein | transcript_product=hypothetical protein | location=TGGT1_chrXII:1930956-1942802(-) | protein_length=2213 | sequence_SO=chromosome | SO=protein_coding_gene | is_pseudo=false	0	FALSE	19.831	5	6	12	6	2213	242.9	5.39	3.65	6	1.019	0.03	0.997939	2.26953e+06	2.31284e+06	28.89	56.55	2	2	2.79211e+06	1.84475e+06	3.53224e+06	1.5144e+06	2.63451e+06	1.84475e+06	3.09044e+06	930059	6	5	6	5	High	High	High	High	1
TGGT1_229930	transcript=TGGT1_229930-t26_1 | gene=TGGT1_229930 | organism=Toxoplasma_gondii_GT1 | gene_product=p25-alpha family protein [Source:UniProtKB/TrEMBL;Acc:A0A125YYS4] | transcript_product=p25-alpha family protein | location=TGGT1_chrVIII:470700-471465(+) | protein_length=163 | sequence_SO=chromosome | SO=protein_coding_gene | is_pseudo=false	0.048	FALSE	1.678	8	1	1	1	163	17.3	8.32	0	1	1.019	0.03	0.997939	409471	417259	5.01	23.78	2	2	424240	395217	494455	352115	400293	395217	432611	216249	1	1	1	1	Peak Found	High	Peak Found	Peak Found	1
TGGT1_222860	transcript=TGGT1_222860-t26_1 | gene=TGGT1_222860 | organism=Toxoplasma_gondii_GT1 | gene_product=Eukaryotic translation initiation factor 3 subunit B [Source:UniProtKB/TrEMBL;Acc:A0A125YS98] | transcript_product=putative eukaryotic translation initiation factor | location=TGGT1_chrII:1241196-1252687(-) | protein_length=756 | sequence_SO=chromosome | SO=protein_coding_gene | is_pseudo=false	0	FALSE	20.667	11	7	13	7	756	88.3	5.5	9.65	7	1.018	0.03	0.999163	2.09025e+06	2.12792e+06	43.02	5.4	2	2	2.86174e+06	1.52675e+06	2.21071e+06	2.04823e+06	2.70021e+06	1.52675e+06	1.9342e+06	1.25791e+06	7	6	6	7	High	High	High	High	1
TGGT1_271050	transcript=TGGT1_271050-t26_1 | gene=TGGT1_271050 | organism=Toxoplasma_gondii_GT1 | gene_product=SAG domain-containing protein [Source:UniProtKB/TrEMBL;Acc:A0A125YVU5] | transcript_product=SAG-related sequence SRS34A | location=TGGT1_chrVIII:4754604-4755164(+) | protein_length=186 | sequence_SO=chromosome | SO=protein_coding_gene | is_pseudo=false	0	FALSE	15.36	30	4	21	4	186	19	7.97	32.43	4	1.017	0.02	0.999163	1.96099e+07	1.99491e+07	97.45	51.23	2	2	4.57033e+07	8.41397e+06	1.36491e+07	2.9157e+07	4.31235e+07	8.41397e+06	1.19419e+07	1.79065e+07	4	3	3	3	High	High	High	High	1	Methylthio [C57; C124]
TGGT1_265390	transcript=TGGT1_265390-t26_1 | gene=TGGT1_265390 | organism=Toxoplasma_gondii_GT1 | gene_product=CTLH domain-containing protein [Source:UniProtKB/TrEMBL;Acc:S7VQF5] | transcript_product=hypothetical protein | location=TGGT1_chrIX:1402136-1409201(+) | protein_length=533 | sequence_SO=chromosome | SO=protein_coding_gene | is_pseudo=false	0.006	FALSE	2.356	1	1	2	1	533	58.8	7.34	1.61	1	1.017	0.02	0.999163	146086	148606	64.12	70.98	2	2	238219	89585.6	258054	85577.7	224772	89585.6	225778	52556.8	1	1	1	1	High	Peak Found	High	Peak Found	1
TGGT1_307810	transcript=TGGT1_307810-t26_1 | gene=TGGT1_307810 | organism=Toxoplasma_gondii_GT1 | gene_product=hypothetical protein | transcript_product=hypothetical protein | location=TGGT1_chrXII:366832-371762(-) | protein_length=433 | sequence_SO=chromosome | SO=protein_coding_gene | is_pseudo=false	0	FALSE	10.812	13	3	9	3	433	45.2	9.52	1.61	3	1.016	0.02	0.999459	667310	678208	2.73	12.68	2	2	680298	654570	741997	619904	641898	654570	649190	380709	2	2	2	2	Peak Found	High	High	High	1	Methylthio [C217; C240]
TGGT1_234440	transcript=TGGT1_234440-t26_1 | gene=TGGT1_234440 | organism=Toxoplasma_gondii_GT1 | gene_product=Aminotran_1_2 domain-containing protein [Source:UniProtKB/TrEMBL;Acc:A0A125YFJ6] | transcript_product=putative aminotransferase | location=TGGT1_chrX:4285968-4290826(+) | protein_length=411 | sequence_SO=chromosome | SO=protein_coding_gene | is_pseudo=false	0.048	FALSE	1.669	2	1	3	1	411	45.6	6.28	0	1	1.016	0.02	0.999459	600878	610471	42.55	40.87	2	2	819663	440491	821980	453386	773396	440491	719169	278443	1	1	1	1	High	Peak Found	High	Peak Found	1
TGGT1_207620	transcript=TGGT1_207620-t26_1 | gene=TGGT1_207620 | organism=Toxoplasma_gondii_GT1 | gene_product=Rieske domain-containing protein [Source:UniProtKB/TrEMBL;Acc:S7VY56] | transcript_product=pyridine nucleotide-disulfide oxidoreductase domain-containing protein | location=TGGT1_chrIb:171089-178693(-) | protein_length=664 | sequence_SO=chromosome | SO=protein_coding_gene | is_pseudo=false	0	FALSE	6.433	4	2	4	2	664	71.2	8.98	3.65	2	1.015	0.02	0.999163	411187	417455	64.01	30.72	2	2	669851	252407	520558	334773	632040	252407	455448	205598	2	2	2	2	High	Peak Found	High	Peak Found	1
TGGT1_223790	transcript=TGGT1_223790-t26_1 | gene=TGGT1_223790 | organism=Toxoplasma_gondii_GT1 | gene_product=hypothetical protein | transcript_product=hypothetical protein | location=TGGT1_chrX:3478527-3485384(+) | protein_length=1003 | sequence_SO=chromosome | SO=protein_coding_gene | is_pseudo=false	0	FALSE	97.733	32	25	86	25	1003	110.1	7.09	120.35	25	1.015	0.02	0.999163	2.57215e+07	2.61126e+07	2.01	20.29	2	2	2.53578e+07	2.60905e+07	2.26001e+07	3.0171e+07	2.39264e+07	2.60905e+07	1.97734e+07	1.85293e+07	21	23	21	24	High	High	High	High	1	Methylthio [C55; C612; C677; C727]; Phospho [S444]
TGGT1_214575	transcript=TGGT1_214575-t26_1 | gene=TGGT1_214575 | organism=Toxoplasma_gondii_GT1 | gene_product=hypothetical protein | transcript_product=hypothetical protein | location=TGGT1_chrX:6262414-6262784(+) | protein_length=92 | sequence_SO=chromosome | SO=protein_coding_gene | is_pseudo=false	0.001	FALSE	5.513	20	1	3	1	92	10.3	8.92	2.91	1	1.013	0.02	0.997939	463923	470036	59.03	48.96	2	2	723603	297435	674493	327556	682758	297435	590130	201166	1	1	1	1	High	High	High	Peak Found	1
TGGT1_229950	transcript=TGGT1_229950-t26_1 | gene=TGGT1_229950 | organism=Toxoplasma_gondii_GT1 | gene_product=AAA domain-containing protein [Source:UniProtKB/TrEMBL;Acc:A0A125YVJ5] | transcript_product=putative 26S proteasome regulatory subunit 6b | location=TGGT1_chrVIII:482161-488358(+) | protein_length=409 | sequence_SO=chromosome | SO=protein_coding_gene | is_pseudo=false	0	FALSE	10.499	10	4	10	4	409	46.1	6.13	5.96	4	1.013	0.02	0.997939	3.42435e+06	3.46888e+06	40.36	38.34	2	2	4.59246e+06	2.55335e+06	4.5807e+06	2.62692e+06	4.33323e+06	2.55335e+06	4.00776e+06	1.6133e+06	4	4	4	4	High	High	High	High	1
TGGT1_313380	transcript=TGGT1_313380-t26_1 | gene=TGGT1_313380 | organism=Toxoplasma_gondii_GT1 | gene_product=hypothetical protein | transcript_product=hypothetical protein | location=TGGT1_chrXI:3292372-3294103(+) | protein_length=274 | sequence_SO=chromosome | SO=protein_coding_gene | is_pseudo=false	0	FALSE	125.384	66	14	349	14	274	31.5	5.58	610.74	14	1.013	0.02	0.997939	5.81545e+08	5.89023e+08	0.89	7.69	2	2	5.77911e+08	5.85201e+08	5.57833e+08	6.21958e+08	5.4529e+08	5.85201e+08	4.88061e+08	3.8197e+08	15	16	15	16	High	High	High	High	1	Methylthio [C34; C74; C119; C237; C250]
TGGT1_313230	transcript=TGGT1_313230-t26_1 | gene=TGGT1_313230 | organism=Toxoplasma_gondii_GT1 | gene_product=S1 motif domain-containing protein [Source:UniProtKB/TrEMBL;Acc:A0A125YGI2] | transcript_product=eukaryotic initiation factor-2, alpha subunit | location=TGGT1_chrXI:3161335-3165437(-) | protein_length=347 | sequence_SO=chromosome | SO=protein_coding_gene | is_pseudo=false	0	FALSE	11.99	15	4	9	4	347	39.1	4.84	7.17	4	1.012	0.02	0.997939	1.20893e+07	1.22296e+07	12.86	3.01	2	2	1.1036e+07	1.3243e+07	1.24927e+07	1.19721e+07	1.04131e+07	1.3243e+07	1.09301e+07	7.35259e+06	4	4	4	3	High	High	High	High	1	Methylthio [C211]
TGGT1_308090	transcript=TGGT1_308090-t26_1 | gene=TGGT1_308090 | organism=Toxoplasma_gondii_GT1 | gene_product=Protein kinase domain-containing protein [Source:UniProtKB/TrEMBL;Acc:A0A125YX85] | transcript_product=rhoptry protein ROP5 | location=AAQM03000031:206-1855(-) | protein_length=549 | sequence_SO=contig | SO=protein_coding_gene | is_pseudo=false	0	FALSE	96.501	40	18	104	7	549	60.7	9.25	176.34	18	1.012	0.02	0.997939	2.84036e+07	2.87313e+07	29.78	22.62	2	2	3.51731e+07	2.29369e+07	3.37605e+07	2.44513e+07	3.31877e+07	2.29369e+07	2.95379e+07	1.50166e+07	7	7	7	7	High	High	High	High	1	Methylthio [C492]
TGGT1_252290	transcript=TGGT1_252290-t26_1 | gene=TGGT1_252290 | organism=Toxoplasma_gondii_GT1 | gene_product=Importin subunit alpha [Source:UniProtKB/TrEMBL;Acc:A0A125YIC7] | transcript_product=putative importin alpha | location=TGGT1_chrIII:450884-460151(+) | protein_length=545 | sequence_SO=chromosome | SO=protein_coding_gene | is_pseudo=false	0	FALSE	8.207	6	3	6	3	545	59.3	4.94	0	3	1.011	0.02	0.997939	699965	707772	44.12	58.08	2	2	966559	506903	1.09509e+06	457441	912000	506903	958124	280933	2	2	2	2	High	High	High	Peak Found	1	Methylthio [C360]
TGGT1_273560	transcript=TGGT1_273560-t26_1 | gene=TGGT1_273560 | organism=Toxoplasma_gondii_GT1 | gene_product=Kinesin motor domain-containing protein [Source:UniProtKB/TrEMBL;Acc:S7V3F2] | transcript_product=putative kinesin heavy chain | location=TGGT1_chrVIII:3381230-3400326(-) | protein_length=1641 | sequence_SO=chromosome | SO=protein_coding_gene | is_pseudo=false	0	FALSE	221.021	38	52	199	52	1641	181.3	6.4	321.54	52	1.009	0.01	0.997227	1.04854e+08	1.05835e+08	0.37	3.03	2	2	1.05125e+08	1.04584e+08	1.03594e+08	1.08125e+08	9.91913e+07	1.04584e+08	9.06364e+07	6.64039e+07	47	51	45	52	High	High	High	High	1	Methylthio [C112; C134; C176; C1010; C1208; C1321; C1361]; Phospho [S540]
TGGT1_232780	transcript=TGGT1_232780-t26_1 | gene=TGGT1_232780 | organism=Toxoplasma_gondii_GT1 | gene_product=hypothetical protein | transcript_product=hypothetical protein | location=TGGT1_chrVIII:2255308-2260311(-) | protein_length=713 | sequence_SO=chromosome | SO=protein_coding_gene | is_pseudo=false	0	FALSE	100.646	39	19	72	19	713	77.6	7.39	117.13	19	1.009	0.01	0.997227	2.11402e+07	2.13353e+07	5.42	23.71	2	2	2.03444e+07	2.19671e+07	1.80136e+07	2.52694e+07	1.9196e+07	2.19671e+07	1.57606e+07	1.5519e+07	20	21	18	21	High	High	High	High	1	Methylthio [C452; C621]; Phospho [S297; S333]
TGGT1_207640	transcript=TGGT1_207640-t26_1 | gene=TGGT1_207640 | organism=Toxoplasma_gondii_GT1 | gene_product=Isoleucyl-tRNA synthetase family protein [Source:UniProtKB/TrEMBL;Acc:S7UJP0] | transcript_product=isoleucyl-tRNA synthetase family protein | location=TGGT1_chrIb:186451-201730(-) | protein_length=1242 | sequence_SO=chromosome | SO=protein_coding_gene | is_pseudo=false	0.001	FALSE	3.604	1	1	4	1	1242	141.3	7.5	3.81	1	1.009	0.01	0.997227	709524	715873	41.93	48.83	2	2	963220	522648	1.02618e+06	499400	908850	522648	897829	306702	1	1	1	1	High	High	High	High	1
TGGT1_202760	transcript=TGGT1_202760-t26_1 | gene=TGGT1_202760 | organism=Toxoplasma_gondii_GT1 | gene_product=hypothetical protein | transcript_product=hypothetical protein | location=TGGT1_chrVIIa:2950166-2953731(-) | protein_length=364 | sequence_SO=chromosome | SO=protein_coding_gene | is_pseudo=false	0.016	FALSE	2.098	4	1	1	1	364	38.6	8.13	0	1	1.008	0.01	0.996496	576538	581082	23.52	59.08	2	2	487450	681907	906738	372386	459935	681907	793326	228698	1	1	1	1	Peak Found	Peak Found	High	Peak Found	1	Biotin [K299]
TGGT1_248880	transcript=TGGT1_248880-t26_1 | gene=TGGT1_248880 | organism=Toxoplasma_gondii_GT1 | gene_product=GTPase RAB7 [Source:UniProtKB/TrEMBL;Acc:S7V0V9] | transcript_product=GTPase RAB7 | location=TGGT1_chrXII:4169929-4175109(-) | protein_length=432 | sequence_SO=chromosome | SO=protein_coding_gene | is_pseudo=false	0	FALSE	28.092	20	7	28	7	432	47.8	9.67	44.98	7	1.007	0.01	0.995017	1.43218e+07	1.44234e+07	67.14	69.95	2	2	2.39973e+07	8.54743e+06	2.48047e+07	8.38685e+06	2.26427e+07	8.54743e+06	2.17022e+07	5.15071e+06	6	5	6	5	High	High	High	High	1
TGGT1_239260	transcript=TGGT1_239260-t26_1 | gene=TGGT1_239260 | organism=Toxoplasma_gondii_GT1 | gene_product=Histone H4 [Source:UniProtKB/TrEMBL;Acc:A0A125YHU3] | transcript_product=histone H4 | location=TGGT1_chrVI:491746-492057(-) | protein_length=103 | sequence_SO=chromosome | SO=protein_coding_gene | is_pseudo=false	0	FALSE	14.736	39	4	18	4	103	11.4	11.36	36.04	4	1.006	0.01	0.995017	2.86402e+07	2.88219e+07	67.95	18.24	2	2	4.83468e+07	1.69662e+07	2.53161e+07	3.28131e+07	4.56178e+07	1.69662e+07	2.21497e+07	2.01519e+07	4	4	4	4	High	High	High	High	1
TGGT1_291880	transcript=TGGT1_291880-t26_1 | gene=TGGT1_291880 | organism=Toxoplasma_gondii_GT1 | gene_product=hypothetical protein | transcript_product=hypothetical protein | location=TGGT1_chrIX:4192980-4199567(+) | protein_length=783 | sequence_SO=chromosome | SO=protein_coding_gene | is_pseudo=false	0	FALSE	28.952	14	8	26	8	783	80.2	9.69	32.08	8	1.005	0.01	0.994751	6.74797e+06	6.78284e+06	2.47	12.07	2	2	6.86666e+06	6.63134e+06	7.38885e+06	6.22653e+06	6.47906e+06	6.63134e+06	6.46468e+06	3.82397e+06	7	8	7	7	High	High	High	High	1	Methylthio [C10]
TGGT1_275860	transcript=TGGT1_275860-t26_1 | gene=TGGT1_275860 | organism=Toxoplasma_gondii_GT1 | gene_product=hypothetical protein | transcript_product=hypothetical protein | location=TGGT1_chrIII:168447-170625(+) | protein_length=383 | sequence_SO=chromosome | SO=protein_coding_gene | is_pseudo=false	0	FALSE	9.381	10	2	5	2	383	43.2	9.09	4.31	2	1.004	0.01	0.994388	4.57679e+06	4.5971e+06	15.98	49.22	2	2	5.12687e+06	4.08572e+06	6.61015e+06	3.1971e+06	4.83748e+06	4.08572e+06	5.78337e+06	1963471	2	2	2	1	High	High	High	High	1
TGGT1_232230	transcript=TGGT1_232230-t26_1 | gene=TGGT1_232230 | organism=Toxoplasma_gondii_GT1 | gene_product=Ribosomal_L7Ae domain-containing protein [Source:UniProtKB/TrEMBL;Acc:A0A125YGX8] | transcript_product=ribosomal protein RPL30 | location=TGGT1_chrVIII:1959965-1961788(-) | protein_length=108 | sequence_SO=chromosome | SO=protein_coding_gene | is_pseudo=false	0	FALSE	16.628	40	4	14	4	108	11.7	9.33	12.94	4	1.003	0	0.993353	4.04328e+06	4.05423e+06	6.11	22.14	2	2	3.87233e+06	4.22178e+06	4.74737e+06	3.4623e+06	3.65375e+06	4.22178e+06	4.15359e+06	2.12634e+06	4	4	4	4	High	High	High	High	1	Methylthio [C51; C68; C84]
TGGT1_313190	transcript=TGGT1_313190-t26_1 | gene=TGGT1_313190 | organism=Toxoplasma_gondii_GT1 | gene_product=Rab18/RabC-family small GTPase [Source:UniProtKB/TrEMBL;Acc:S7W1J2] | transcript_product=Rab18/RabC-family small GTPase | location=TGGT1_chrXI:3125795-3129697(+) | protein_length=212 | sequence_SO=chromosome | SO=protein_coding_gene | is_pseudo=false	0	FALSE	10.965	14	3	18	1	212	23.5	7.44	37.4	3	1.002	0	0.992903	1.46331e+06	1.46642e+06	52.49	55.87	2	2	2.16079e+06	990966	2.22688e+06	965655	2.03882e+06	990966	1.94835e+06	593049	1	1	1	1	High	High	High	High	1
TGGT1_295450	transcript=TGGT1_295450-t26_1 | gene=TGGT1_295450 | organism=Toxoplasma_gondii_GT1 | gene_product=Sjoegren syndrome nuclear autoantigen 1 family protein [Source:UniProtKB/TrEMBL;Acc:A0A125YRV2] | transcript_product=sjoegren syndrome nuclear autoantigen 1 family protein | location=TGGT1_chrIa:1731693-1733202(+) | protein_length=150 | sequence_SO=chromosome | SO=protein_coding_gene | is_pseudo=false	0	FALSE	11.826	28	3	6	3	150	16.9	8.63	5.53	3	1.002	0	0.992903	392142	392886	37.15	66.39	2	2	299649	513185	236070	653872	282735	513185	206543	401570	1	2	1	2	High	High	High	High	1
TGGT1_319710	transcript=TGGT1_319710-t26_1 | gene=TGGT1_319710 | organism=Toxoplasma_gondii_GT1 | gene_product=Kinesin motor domain-containing protein [Source:UniProtKB/TrEMBL;Acc:S7UJD1] | transcript_product=kinesin motor domain-containing protein | location=TGGT1_chrIV:713669-720540(+) | protein_length=1316 | sequence_SO=chromosome | SO=protein_coding_gene | is_pseudo=false	0	FALSE	39.059	12	12	32	12	1316	143.5	6.11	36.98	12	1.001	0	0.992903	4.09182e+06	4.09628e+06	2.93	5.53	2	2	4.17753e+06	4.00787e+06	4.2597e+06	3.93913e+06	3.94173e+06	4.00787e+06	3.72691e+06	2.41918e+06	10	12	11	11	High	High	High	High	1	Methylthio [C681; C734; C1167]
TGGT1_228190	transcript=TGGT1_228190-t26_1 | gene=TGGT1_228190 | organism=Toxoplasma_gondii_GT1 | gene_product=JAB_MPN domain-containing protein [Source:UniProtKB/TrEMBL;Acc:A0A125YGD9] | transcript_product=putative eukaryotic initiation factor-3, subunit 5 | location=TGGT1_chrX:414529-416813(+) | protein_length=346 | sequence_SO=chromosome | SO=protein_coding_gene | is_pseudo=false	0.053	FALSE	1.612	4	1	2	1	346	38	6.52	0	1	1	0	0.992903	194125	194157	NA	18.76	1	2	194125	NA	221879	169899	183168	NA	194127	104342	1	NA	1	1	High	Not Found	High	Peak Found	1
TGGT1_311290	transcript=TGGT1_311290-t26_1 | gene=TGGT1_311290 | organism=Toxoplasma_gondii_GT1 | gene_product=Protein tyrosine phosphatase family protein, ptpla protein [Source:UniProtKB/TrEMBL;Acc:A0A125YHT1] | transcript_product=protein tyrosine phosphatase family protein, ptpla protein | location=TGGT1_chrXI:1911350-1913933(-) | protein_length=274 | sequence_SO=chromosome | SO=protein_coding_gene | is_pse…	0	FALSE	6.612	9	2	7	2	274	30.5	8.85	8.93	2	1	0	0.992903	1.3034e+06	1.30276e+06	45.83	71.74	2	2	1.82425e+06	931268	2.27865e+06	744822	1.72127e+06	931268	1.99365e+06	457426	2	2	2	2	High	High	High	High	1
TGGT1_254580	transcript=TGGT1_254580-t26_1 | gene=TGGT1_254580 | organism=Toxoplasma_gondii_GT1 | gene_product=UDP-galactose transporter family protein [Source:UniProtKB/TrEMBL;Acc:S7UMX4] | transcript_product=UDP-galactose transporter family protein | location=TGGT1_chrIII:1827569-1829516(-) | protein_length=413 | sequence_SO=chromosome | SO=protein_coding_gene | is_pseudo=false	0	FALSE	7.209	6	1	4	1	413	45.5	9.42	5.24	1	0.999	0	0.992903	491942	491464	2.2	25.59	2	2	484363	499640	590129	409295	457023	499640	516318	251365	1	1	1	1	High	High	High	High	1
TGGT1_226040	transcript=TGGT1_226040-t26_1 | gene=TGGT1_226040 | organism=Toxoplasma_gondii_GT1 | gene_product=EF hand domain-containing protein [Source:UniProtKB/TrEMBL;Acc:A0A125YWI4] | transcript_product=EF hand domain-containing protein | location=TGGT1_chrX:1759538-1760047(+) | protein_length=169 | sequence_SO=chromosome | SO=protein_coding_gene | is_pseudo=false	0	FALSE	18.596	34	5	14	5	169	19	5.05	20.68	5	0.998	0	0.992903	1.66897e+06	1.66645e+06	24.91	25.4	2	2	1.39687e+06	1.99409e+06	1.9983e+06	1.38971e+06	1.31802e+06	1.99409e+06	1.74836e+06	853481	5	5	5	5	High	High	High	High	1	Methylthio [C107; C161]
TGGT1_228770	transcript=TGGT1_228770-t26_1 | gene=TGGT1_228770 | organism=Toxoplasma_gondii_GT1 | gene_product=hypothetical protein | transcript_product=hypothetical protein | location=TGGT1_chrX:57101-62681(-) | protein_length=542 | sequence_SO=chromosome | SO=protein_coding_gene | is_pseudo=false	0.049	FALSE	1.658	2	1	2	1	542	59	5.22	0	1	0.998	0	0.992903	268585	268055	30.67	57.98	2	2	334796	215469	414363	173407	315898	215469	362536	106497	1	1	1	1	Peak Found	High	High	Peak Found	1
TGGT1_214220	transcript=TGGT1_214220-t26_1 | gene=TGGT1_214220 | organism=Toxoplasma_gondii_GT1 | gene_product=hypothetical protein | transcript_product=hypothetical protein | location=TGGT1_chrX:6010193-6012510(+) | protein_length=212 | sequence_SO=chromosome | SO=protein_coding_gene | is_pseudo=false	0	FALSE	14.181	21	3	26	3	212	23.4	9.83	20.41	3	0.997	0	0.992903	2.61944e+07	2.61111e+07	8.21	5.46	2	2	2.47161e+07	2.77612e+07	2.51225e+07	2.71386e+07	2.3321e+07	2.77612e+07	2.19802e+07	1.6667e+07	3	3	3	3	High	High	High	High	1
TGGT1_289830	transcript=TGGT1_289830-t26_1 | gene=TGGT1_289830 | organism=Toxoplasma_gondii_GT1 | gene_product=Eukaryotic translation initiation factor 3 subunit I [Source:UniProtKB/TrEMBL;Acc:A0A125YIM0] | transcript_product=putative eukaryotic initiation factor-3, delta subunit | location=TGGT1_chrIX:3281722-3286956(+) | protein_length=335 | sequence_SO=chromosome | SO=protein_coding_gene | is_pseudo=false	0	FALSE	12.081	15	4	9	4	335	37.7	5.69	1.75	4	0.996	-0.01	0.992903	1.08057e+06	1.07624e+06	24.84	8	2	2	1.29044e+06	904832	1.13891e+06	1.01701e+06	1.2176e+06	904832	996458	624590	4	4	4	4	High	High	High	High	1	Methylthio [C28; C50; C252]
TGGT1_239752	transcript=TGGT1_239752-t26_1 | gene=TGGT1_239752 | organism=Toxoplasma_gondii_GT1 | gene_product=hypothetical protein | transcript_product=hypothetical protein | location=TGGT1_chrVI:884973-888129(+) | protein_length=905 | sequence_SO=chromosome | SO=protein_coding_gene | is_pseudo=false	0	FALSE	8.253	3	2	5	2	905	102.1	6.37	0	2	0.996	-0.01	0.992903	666892	663987	12.3	39.34	2	2	611227	727627	498964	883588	576725	727627	436556	542648	2	2	2	2	High	High	High	High	1
TGGT1_219200	transcript=TGGT1_219200-t26_1 | gene=TGGT1_219200 | organism=Toxoplasma_gondii_GT1 | gene_product=DEAD/DEAH box RNA helicase family protein [Source:UniProtKB/TrEMBL;Acc:S7V240] | transcript_product=DEAD/DEAH box RNA helicase family protein | location=TGGT1_chrXII:1014829-1023619(+) | protein_length=962 | sequence_SO=chromosome | SO=protein_coding_gene | is_pseudo=false	0.043	FALSE	1.708	1	1	1	1	962	107.3	6.34	0	1	0.995	-0.01	0.992903	131284	130665	11.23	73.14	2	2	121239	142162	231616	73713.9	114396	142162	202647	45270.8	1	1	1	1	Peak Found	Peak Found	High	Peak Found	1
TGGT1_222350	transcript=TGGT1_222350-t26_1 | gene=TGGT1_222350 | organism=Toxoplasma_gondii_GT1 | gene_product=hypothetical protein | transcript_product=hypothetical protein | location=TGGT1_chrII:1038452-1045656(-) | protein_length=410 | sequence_SO=chromosome | SO=protein_coding_gene | is_pseudo=false	0	FALSE	70.138	46	18	71	18	410	47.9	8.88	108.64	18	0.995	-0.01	0.992903	3.90887e+07	3.89007e+07	5.51	11.79	2	2	3.75935e+07	4.06433e+07	3.5782e+07	4.22913e+07	3.54715e+07	4.06433e+07	3.13065e+07	2.59729e+07	16	17	16	18	High	High	High	High	1	Methylthio [C343]
TGGT1_272155	transcript=TGGT1_272155-t26_1 | gene=TGGT1_272155 | organism=Toxoplasma_gondii_GT1 | gene_product=hypothetical protein | transcript_product=hypothetical protein | location=TGGT1_chrVIII:4165445-4182836(-) | protein_length=4617 | sequence_SO=chromosome | SO=protein_coding_gene | is_pseudo=false	0	FALSE	68.914	6	22	47	22	4617	493.5	7.56	29.89	22	0.995	-0.01	0.992903	6.31058e+06	6.27828e+06	23	6.79	2	2	7.43569e+06	5.35571e+06	6.58719e+06	5.98386e+06	7.01597e+06	5.35571e+06	5.76329e+06	3.67494e+06	22	21	21	22	High	High	High	High	1	Methylthio [C2768; C3707; C4564]
TGGT1_293570	transcript=TGGT1_293570-t26_1 | gene=TGGT1_293570 | organism=Toxoplasma_gondii_GT1 | gene_product=Putative translocation protein sec62 [Source:UniProtKB/TrEMBL;Acc:A0A125YTM7] | transcript_product=putative translocation protein sec62 | location=TGGT1_chrIa:408074-414572(-) | protein_length=390 | sequence_SO=chromosome | SO=protein_coding_gene | is_pseudo=false	0.001	FALSE	3.585	3	1	4	1	390	44.9	6.37	0	1	0.994	-0.01	0.992903	239407	238025	47.25	13.01	2	2	338873	169136	217054	261022	319745	169136	189905	160305	1	1	1	1	High	High	High	High	1
TGGT1_289690	transcript=TGGT1_289690-t26_1 | gene=TGGT1_289690 | organism=Toxoplasma_gondii_GT1 | gene_product=Glyceraldehyde-3-phosphate dehydrogenase [Source:UniProtKB/TrEMBL;Acc:S7UQ54] | transcript_product=glyceraldehyde-3-phosphate dehydrogenase GAPDH1 | location=TGGT1_chrIX:3189155-3191218(-) | protein_length=489 | sequence_SO=chromosome | SO=protein_coding_gene | is_pseudo=false	0	FALSE	59.41	33	11	48	11	489	53.3	8.31	96.26	11	0.994	-0.01	0.992903	2.81907e+07	2.80251e+07	58.66	6.3	2	2	4.38337e+07	1.81303e+07	2.6803e+07	2.93028e+07	4.13594e+07	1.81303e+07	2.34506e+07	1.79961e+07	11	11	11	11	High	High	High	High	1	Methylthio [C244; C398; C441]
TGGT1_270510	transcript=TGGT1_270510-t26_1 | gene=TGGT1_270510 | organism=Toxoplasma_gondii_GT1 | gene_product=AA_TRNA_LIGASE_II domain-containing protein [Source:UniProtKB/TrEMBL;Acc:S7WKJ0] | transcript_product=asparaginyl-tRNA synthetase (NOB+tRNA synthase) | location=TGGT1_chrVIII:5218409-5221722(+) | protein_length=676 | sequence_SO=chromosome | SO=protein_coding_gene | is_pseudo=false	0	FALSE	49.551	21	13	47	13	676	74.9	8.03	68.31	13	0.993	-0.01	0.992903	1.85642e+07	1.8441e+07	25.06	20.71	2	2	2.22058e+07	1.55197e+07	2.13716e+07	1.59122e+07	2.09524e+07	1.55197e+07	1.86985e+07	9.77234e+06	12	12	11	11	High	High	High	High	1	Methylthio [C157; C197; C243; C247]
TGGT1_231630	transcript=TGGT1_231630-t26_1 | gene=TGGT1_231630 | organism=Toxoplasma_gondii_GT1 | gene_product=Alveolin domain containing intermediate filament IMC4 [Source:UniProtKB/TrEMBL;Acc:A0A125YPY9] | transcript_product=alveolin domain containing intermediate filament IMC4 | location=TGGT1_chrVIII:1508307-1510463(-) | protein_length=452 | sequence_SO=chromosome | SO=protein_coding_gene | is_pseudo=false	0	FALSE	156.016	49	12	305	12	452	50.1	5.95	526.92	12	0.993	-0.01	0.992903	7.97377e+08	7.91743e+08	9.36	2.07	2	2	8.52027e+08	7.46232e+08	8.03436e+08	7.8022e+08	8.03934e+08	7.46232e+08	7.02945e+08	4.79165e+08	21	21	22	20	High	High	High	High	1	Phospho [S32; T382; S386; S390; S391; T395; S398; S405]
TGGT1_214350	transcript=TGGT1_214350-t26_1 | gene=TGGT1_214350 | organism=Toxoplasma_gondii_GT1 | gene_product=Obg-like ATPase 1 [Source:UniProtKB/TrEMBL;Acc:A0A125YQA5] | transcript_product=putative GTP-binding protein | location=TGGT1_chrX:6150425-6154448(+) | protein_length=396 | sequence_SO=chromosome | SO=protein_coding_gene | is_pseudo=false	0	FALSE	7.743	10	3	3	3	396	44.5	7.02	0	3	0.993	-0.01	0.992903	636131	631600	21.92	3.55	2	2	743708	544115	615922	647678	701729	544115	538885	397766	3	3	3	3	High	Peak Found	Peak Found	High	1
TGGT1_319920	transcript=TGGT1_319920-t26_1 | gene=TGGT1_319920 | organism=Toxoplasma_gondii_GT1 | gene_product=Dihydrolipoamide acetyltransferase component of pyruvate dehydrogenase complex [Source:UniProtKB/TrEMBL;Acc:S7UK76] | transcript_product=2-oxo acid dehydrogenases acyltransferase (catalytic domain) domain-containing protein | location=TGGT1_chrIV:604302-610675(-) | protein_length=669 | sequence_SO=ch…	0	FALSE	9.534	4	2	4	2	669	70.2	6.8	4.66	2	0.993	-0.01	0.992903	3.36213e+06	3.33789e+06	58.85	1.64	2	2	5.23609e+06	2.15885e+06	3.37675e+06	3.29947e+06	4.94054e+06	2.15885e+06	2.9544e+06	2.02634e+06	3	3	3	3	High	Peak Found	High	High	1
TGGT1_265330	transcript=TGGT1_265330-t26_1 | gene=TGGT1_265330 | organism=Toxoplasma_gondii_GT1 | gene_product=Protein kinase domain-containing protein [Source:UniProtKB/TrEMBL;Acc:A0A125YY75] | transcript_product=putative cell-cycle-associated protein kinase GSK | location=TGGT1_chrIX:1430680-1432489(-) | protein_length=394 | sequence_SO=chromosome | SO=protein_coding_gene | is_pseudo=false	0.001	FALSE	4.685	9	2	4	2	394	44.4	8.32	1.62	2	0.992	-0.01	0.992903	663122	658005	52.62	27.7	2	2	980218	448605	802443	539565	924888	448605	702076	331369	2	2	2	2	High	High	High	Peak Found	1	Methylthio [C194]
TGGT1_295850	transcript=TGGT1_295850-t26_1 | gene=TGGT1_295850 | organism=Toxoplasma_gondii_GT1 | gene_product=Cyclic nucleotide-binding domain-containing protein [Source:UniProtKB/TrEMBL;Acc:S7VRS7] | transcript_product=cyclic nucleotide-binding domain-containing protein | location=TGGT1_chrIa:1477996-1491633(-) | protein_length=3062 | sequence_SO=chromosome | SO=protein_coding_gene | is_pseudo=false	0	FALSE	156.915	20	44	115	44	3062	331.3	6.48	124.21	44	0.992	-0.01	0.992903	3.82327e+07	3.79188e+07	20.49	1.19	2	2	4.42384e+07	3.30424e+07	3.82389e+07	3.76013e+07	4.17413e+07	3.30424e+07	3.34561e+07	2.30925e+07	43	43	43	43	High	High	High	High	1	Methylthio [C638; C1207; C1214; C1424; C1498; C1934; C2387]
TGGT1_249390	transcript=TGGT1_249390-t26_1 | gene=TGGT1_249390 | organism=Toxoplasma_gondii_GT1 | gene_product=ELFV_dehydrog domain-containing protein [Source:UniProtKB/TrEMBL;Acc:S7W941] | transcript_product=glutamate/leucine/phenylalanine/valine dehydrogenase family protein | location=TGGT1_chrXII:4441593-4452115(+) | protein_length=1206 | sequence_SO=chromosome | SO=protein_coding_gene | is_pseudo=false	0	FALSE	44.046	16	15	29	15	1206	135.4	7.37	12.41	15	0.991	-0.01	0.992903	4.08066e+06	4.04358e+06	21.78	13.8	2	2	4.76601e+06	3.49387e+06	4.45948e+06	3.66647e+06	4.49698e+06	3.49387e+06	3.90171e+06	2.25173e+06	14	14	14	14	High	High	High	High	1	Methylthio [C489; C781; C1097]
TGGT1_250340	transcript=TGGT1_250340-t26_1 | gene=TGGT1_250340 | organism=Toxoplasma_gondii_GT1 | gene_product=Centrin 2 [Source:UniProtKB/TrEMBL;Acc:S7V0C6] | transcript_product=centrin 2 | location=TGGT1_chrXII:4993747-4995535(-) | protein_length=170 | sequence_SO=chromosome | SO=protein_coding_gene | is_pseudo=false	0	FALSE	41.751	75	10	32	10	170	19.1	4.67	38.43	10	0.991	-0.01	0.992903	1.0788e+07	1.06878e+07	36.2	29.96	2	2	1.40163e+07	8.3033e+06	1.32524e+07	8.61954e+06	1.32251e+07	8.3033e+06	1.15949e+07	5.29362e+06	9	10	9	10	High	High	High	High	1
TGGT1_266630	transcript=TGGT1_266630-t26_1 | gene=TGGT1_266630 | organism=Toxoplasma_gondii_GT1 | gene_product=ANK_REP_REGION domain-containing protein [Source:UniProtKB/TrEMBL;Acc:A0A125YLZ4] | transcript_product=hypothetical protein | location=TGGT1_chrIX:900290-905135(+) | protein_length=582 | sequence_SO=chromosome | SO=protein_coding_gene | is_pseudo=false	0	FALSE	114.67	42	23	111	23	582	67.3	8.21	176.94	23	0.99	-0.02	0.992903	4.4831e+07	4.43642e+07	9.12	9.18	2	2	4.20278e+07	4.78211e+07	4.15727e+07	4.73431e+07	3.96555e+07	4.78211e+07	3.63729e+07	2.90754e+07	23	24	23	24	High	High	High	High	1	Methylthio [C159; C168; C316; C407]; Phospho [S531]
TGGT1_270690	transcript=TGGT1_270690-t26_1 | gene=TGGT1_270690 | organism=Toxoplasma_gondii_GT1 | gene_product=Arginyl-tRNA synthetase [Source:UniProtKB/TrEMBL;Acc:A0A125YS10] | transcript_product=arginyl-tRNA synthetase | location=TGGT1_chrVIII:5067864-5080628(-) | protein_length=1174 | sequence_SO=chromosome | SO=protein_coding_gene | is_pseudo=false	0	FALSE	37.91	15	14	20	14	1174	130.2	6.58	8.16	14	0.988	-0.02	0.992903	1.3152e+07	1.29939e+07	6.99	6.73	2	2	1.2517e+07	1.38193e+07	1.36281e+07	1.23892e+07	1.18105e+07	1.38193e+07	1.19235e+07	7.60871e+06	12	14	11	12	High	High	High	Peak Found	1	Methylthio [C441; C496]
TGGT1_234270	transcript=TGGT1_234270-t26_1 | gene=TGGT1_234270 | organism=Toxoplasma_gondii_GT1 | gene_product=hypothetical protein | transcript_product=hypothetical protein | location=TGGT1_chrX:4150640-4163518(+) | protein_length=2027 | sequence_SO=chromosome | SO=protein_coding_gene | is_pseudo=false	0	FALSE	97.49	21	28	80	28	2027	217.7	7.56	70.36	28	0.987	-0.02	0.992903	1.61936e+07	1.59793e+07	14.66	23.48	2	2	1.45939e+07	1.79688e+07	1.35143e+07	1.8894e+07	1.37701e+07	1.79688e+07	1.1824e+07	1.16036e+07	27	26	27	27	High	High	High	High	1	Methylthio [C180; C681; C824; C973; C986; C1651; C1686]
TGGT1_201680	transcript=TGGT1_201680-t26_1 | gene=TGGT1_201680 | organism=Toxoplasma_gondii_GT1 | gene_product=Eukaryotic translation initiation factor 3 subunit A [Source:UniProtKB/TrEMBL;Acc:S7WB14] | transcript_product=putative eukaryotic initiation factor-3 subunit 10 | location=TGGT1_chrVIIa:3754116-3762345(+) | protein_length=1031 | sequence_SO=chromosome | SO=protein_coding_gene | is_pseudo=false	0	FALSE	46.042	18	13	33	13	1031	118.8	8.73	23.93	13	0.986	-0.02	0.992903	4.71762e+06	4.65201e+06	32.22	29.29	2	2	5.94885e+06	3.74122e+06	5.73993e+06	3.77029e+06	5.61306e+06	3.74122e+06	5.022e+06	2.31549e+06	13	12	12	11	High	High	High	High	1	Methylthio [C741]
TGGT1_256770	transcript=TGGT1_256770-t26_1 | gene=TGGT1_256770 | organism=Toxoplasma_gondii_GT1 | gene_product=Putative eukaryotic translation initiation factor 4A, isoform 3 [Source:UniProtKB/TrEMBL;Acc:A0A125YSV5] | transcript_product=putative eukaryotic translation initiation factor 4A, isoform 3 | location=TGGT1_chrVIIb:4408455-4411451(+) | protein_length=395 | sequence_SO=chromosome | SO=protein_coding_g…	0	FALSE	15.413	18	6	12	6	395	45.1	6.38	7.75	6	0.984	-0.02	0.992903	2.13998e+06	2.10652e+06	47.42	35.49	2	2	3.0332e+06	1.5098e+06	2.72221e+06	1.63008e+06	2.86199e+06	1.5098e+06	2.38173e+06	1.0011e+06	5	5	5	5	High	High	High	High	1
TGGT1_211850	transcript=TGGT1_211850-t26_1 | gene=TGGT1_211850 | organism=Toxoplasma_gondii_GT1 | gene_product=hypothetical protein | transcript_product=hypothetical protein | location=TGGT1_chrX:4062162-4062901(-) | protein_length=173 | sequence_SO=chromosome | SO=protein_coding_gene | is_pseudo=false	0.001	FALSE	4.543	10	2	3	2	173	18.4	7.64	0	2	0.983	-0.02	0.992903	1.47411e+06	1.44937e+06	9.87	6.83	2	2	1.58089e+06	1.37455e+06	1.52116e+06	1.38096e+06	1.49166e+06	1.37455e+06	1.33089e+06	848107	1	2	1	2	High	High	Peak Found	Peak Found	1
TGGT1_225690	transcript=TGGT1_225690-t26_1 | gene=TGGT1_225690 | organism=Toxoplasma_gondii_GT1 | gene_product=hypothetical protein | transcript_product=hypothetical protein | location=TGGT1_chrX:2025685-2031135(+) | protein_length=1816 | sequence_SO=chromosome | SO=protein_coding_gene | is_pseudo=false	0	FALSE	305.467	44	51	301	51	1816	194	6.13	481.29	51	0.983	-0.02	0.992903	1.50605e+08	1.48065e+08	2.68	1.44	2	2	1.53485e+08	1.47779e+08	1.49584e+08	1.46562e+08	1.44821e+08	1.47779e+08	1.30874e+08	9.00101e+07	51	52	50	50	High	High	High	High	1	Phospho [S142; Y146; S588; S976; S980; S981; Y1021]; Methylthio [C434; C445; C611; C622; C960; C1317; C1516; C1519; C1520]
TGGT1_206690	transcript=TGGT1_206690-t26_1 | gene=TGGT1_206690 | organism=Toxoplasma_gondii_GT1 | gene_product=Glideosome-associated protein with multiple-membrane spans GAPM2B [Source:UniProtKB/TrEMBL;Acc:A0A125YVU7] | transcript_product=glideosome-associated protein with multiple-membrane spans GAPM2B | location=TGGT1_chrVIIa:697425-699242(+) | protein_length=426 | sequence_SO=chromosome | SO=protein_coding…	0	FALSE	46.825	24	7	57	7	426	46.8	5.15	125.18	7	0.983	-0.03	0.992903	6.05339e+07	5.9475e+07	1.64	4.94	2	2	5.98373e+07	6.12385e+07	5.74316e+07	6.15912e+07	5.64597e+07	6.12385e+07	5.02483e+07	3.78257e+07	9	10	8	9	High	High	High	High	1	Phospho [T32; S42; S44; S327]; Methylthio [C349]
TGGT1_297650	transcript=TGGT1_297650-t26_1 | gene=TGGT1_297650 | organism=Toxoplasma_gondii_GT1 | gene_product=Metallophos domain-containing protein [Source:UniProtKB/TrEMBL;Acc:S7UJX7] | transcript_product=Ser/Thr phosphatase family protein | location=TGGT1_chrII:1870431-1877352(-) | protein_length=651 | sequence_SO=chromosome | SO=protein_coding_gene | is_pseudo=false	0.007	FALSE	2.518	3	1	3	1	651	72.5	9.31	0	1	0.982	-0.03	0.992903	253151	248619	15.06	21.7	2	2	281718	227481	290200	212996	265816	227481	253903	130810	1	1	1	1	High	High	High	Peak Found	1
TGGT1_257470	transcript=TGGT1_257470-t26_1 | gene=TGGT1_257470 | organism=Toxoplasma_gondii_GT1 | gene_product=Myosin motor domain-containing protein [Source:UniProtKB/TrEMBL;Acc:S7WF44] | transcript_product=myosin J | location=TGGT1_chrVIIb:3962778-3973847(+) | protein_length=2532 | sequence_SO=chromosome | SO=protein_coding_gene | is_pseudo=false	0	FALSE	168.739	25	44	124	44	2532	273.5	8.65	139.88	44	0.982	-0.03	0.992903	2.78036e+07	2.72899e+07	0.36	4.85	2	2	2.77327e+07	2.78746e+07	2.63693e+07	2.82425e+07	2.61673e+07	2.78746e+07	2.30711e+07	1.73449e+07	42	42	42	41	High	High	High	High	1	Methylthio [C377; C385; C447; C807; C1613; C1724; C2334; C2363]
TGGT1_288530	transcript=TGGT1_288530-t26_1 | gene=TGGT1_288530 | organism=Toxoplasma_gondii_GT1 | gene_product=SAM_MT_RSMB_NOP domain-containing protein [Source:UniProtKB/TrEMBL;Acc:A0A125YRB9] | transcript_product=NOL1/NOP2/sun family protein | location=TGGT1_chrIX:2409169-2414972(+) | protein_length=804 | sequence_SO=chromosome | SO=protein_coding_gene | is_pseudo=false	0	FALSE	7.749	5	3	3	3	804	87.6	8.87	0	3	0.981	-0.03	0.992903	1.7759e+06	1.7415e+06	34.29	31.3	2	2	2.27441e+06	1.38666e+06	2.18104e+06	1.39054e+06	2.14602e+06	1.38666e+06	1.90824e+06	853986	3	3	3	3	High	Peak Found	High	Peak Found	1	Methylthio [C622]
TGGT1_267370	transcript=TGGT1_267370-t26_1 | gene=TGGT1_267370 | organism=Toxoplasma_gondii_GT1 | gene_product=Kinesin motor domain-containing protein [Source:UniProtKB/TrEMBL;Acc:S7VW10] | transcript_product=kinesin motor domain-containing protein | location=TGGT1_chrIX:516427-528271(+) | protein_length=2395 | sequence_SO=chromosome | SO=protein_coding_gene | is_pseudo=false	0	FALSE	142.216	24	37	100	37	2395	256.6	8.54	94.22	37	0.98	-0.03	0.992903	1.79205e+07	1.7565e+07	6.41	23.03	2	2	1.87523e+07	1.71257e+07	1.49039e+07	2.07013e+07	1.76938e+07	1.71257e+07	1.30397e+07	1.27136e+07	32	30	27	29	High	High	High	High	1	Methylthio [C185; C644; C844; C1070; C1423; C1426; C1952; C2125; C2204]
TGGT1_315750	transcript=TGGT1_315750-t26_1 | gene=TGGT1_315750 | organism=Toxoplasma_gondii_GT1 | gene_product=hypothetical protein | transcript_product=hypothetical protein | location=TGGT1_chrXI:4888664-4890249(-) | protein_length=231 | sequence_SO=chromosome | SO=protein_coding_gene | is_pseudo=false	0	FALSE	86.87	57	10	90	10	231	25.7	5.14	187.04	10	0.979	-0.03	0.992903	4.95161e+07	4.84881e+07	8.59	8.65	2	2	5.26195e+07	4.65957e+07	5.15499e+07	4.56082e+07	4.96493e+07	4.65957e+07	4.51022e+07	2.80099e+07	17	18	17	18	High	High	High	High	1	Methylthio [C176; C194; C224]; Phospho [S24; S29; S42; S46; T54; T57; S85]
TGGT1_225810	transcript=TGGT1_225810-t26_1 | gene=TGGT1_225810 | organism=Toxoplasma_gondii_GT1 | gene_product=BIR protein [Source:UniProtKB/TrEMBL;Acc:A0A125YL05] | transcript_product=BIR protein | location=TGGT1_chrX:1936077-1939303(+) | protein_length=271 | sequence_SO=chromosome | SO=protein_coding_gene | is_pseudo=false	0.04	FALSE	1.722	5	1	2	1	271	32.5	10.04	0	1	0.979	-0.03	0.992903	361117	353608	61.65	64.94	2	2	576161	226335	580836	215274	543639	226335	508187	132208	1	1	1	1	High	High	Peak Found	Peak Found	1	Phospho [Y178]
TGGT1_207200	transcript=TGGT1_207200-t26_1 | gene=TGGT1_207200 | organism=Toxoplasma_gondii_GT1 | gene_product=hypothetical protein | transcript_product=hypothetical protein | location=TGGT1_chrX:7310042-7318105(-) | protein_length=1604 | sequence_SO=chromosome | SO=protein_coding_gene | is_pseudo=false	0.049	FALSE	1.66	1	1	1	1	1604	175.6	7.01	0	1	0.979	-0.03	0.992903	412863	404136	40.79	13.92	2	2	555545	306826	446072	366142	524187	306826	390279	224863	1	1	1	1	Peak Found	High	Peak Found	Peak Found	1	Phospho [Y1152]
TGGT1_300010	transcript=TGGT1_300010-t26_1 | gene=TGGT1_300010 | organism=Toxoplasma_gondii_GT1 | gene_product=hypothetical protein | transcript_product=hypothetical protein | location=TGGT1_chrXII:241429-247736(-) | protein_length=400 | sequence_SO=chromosome | SO=protein_coding_gene | is_pseudo=false	0.001	FALSE	3.246	4	1	2	1	400	45.3	9.35	0	1	0.978	-0.03	0.992903	441889	431985	23.07	64.68	2	2	374831	520943	707926	263603	353673	520943	619381	161889	1	1	1	1	Peak Found	Peak Found	High	Peak Found	1
TGGT1_245640	transcript=TGGT1_245640-t26_1 | gene=TGGT1_245640 | organism=Toxoplasma_gondii_GT1 | gene_product=hypothetical protein | transcript_product=hypothetical protein | location=TGGT1_chrXII:2379517-2382152(-) | protein_length=416 | sequence_SO=chromosome | SO=protein_coding_gene | is_pseudo=false	0	FALSE	63.491	46	14	67	14	416	46.5	9.44	111.63	14	0.977	-0.03	0.992903	4.54611e+07	4.44321e+07	1.1	1.69	2	2	4.51094e+07	4.58156e+07	4.49659e+07	4.39046e+07	4.25632e+07	4.58156e+07	3.93417e+07	2.69636e+07	13	13	12	13	High	High	High	High	1	Methylthio [C260; C292; C365]
TGGT1_289770	transcript=TGGT1_289770-t26_1 | gene=TGGT1_289770 | organism=Toxoplasma_gondii_GT1 | gene_product=MHD domain-containing protein [Source:UniProtKB/TrEMBL;Acc:A0A125YND3] | transcript_product=mu1 adaptin | location=TGGT1_chrIX:3244934-3246226(+) | protein_length=430 | sequence_SO=chromosome | SO=protein_coding_gene | is_pseudo=false	0	FALSE	10.248	12	4	9	4	430	48.9	8	1.85	4	0.977	-0.03	0.992903	4.91205e+06	4.8008e+06	9.81	3.72	2	2	5.26538e+06	4.58242e+06	4.67616e+06	4.92875e+06	4.96817e+06	4.58242e+06	4.09129e+06	3.02695e+06	3	4	4	3	Peak Found	High	High	High	1
TGGT1_283850	transcript=TGGT1_283850-t26_1 | gene=TGGT1_283850 | organism=Toxoplasma_gondii_GT1 | gene_product=Peptidylprolyl isomerase [Source:UniProtKB/TrEMBL;Acc:S7UMS7] | transcript_product=peptidyl-prolyl cis-trans isomerase | location=TGGT1_chrV:2748825-2756049(-) | protein_length=503 | sequence_SO=chromosome | SO=protein_coding_gene | is_pseudo=false	0	FALSE	17.082	14	5	13	5	503	55.5	5.59	5.54	5	0.974	-0.04	0.992903	1.23078e+06	1.1989e+06	38.83	24.6	2	2	928502	1.63147e+06	1.00566e+06	1.42928e+06	876092	1.63147e+06	879872	877782	4	4	4	4	Peak Found	High	High	High	1	Methylthio [C498]
TGGT1_219270	transcript=TGGT1_219270-t26_1 | gene=TGGT1_219270 | organism=Toxoplasma_gondii_GT1 | gene_product=Multi-pass transmembrane protein [Source:UniProtKB/TrEMBL;Acc:A0A125YRY2] | transcript_product=multi-pass transmembrane protein | location=TGGT1_chrXII:948336-949904(+) | protein_length=389 | sequence_SO=chromosome | SO=protein_coding_gene | is_pseudo=false	0	FALSE	70.435	30	6	83	6	389	43	4.94	127.26	6	0.974	-0.04	0.992903	1.67941e+08	1.63519e+08	10.27	3.69	2	2	1.80608e+08	1.56163e+08	1.67842e+08	1.59308e+08	1.70413e+08	1.56163e+08	1.46849e+08	9.78374e+07	8	8	8	8	High	High	High	High	1	Phospho [T26; Y28; T34; T38; S348; Y352]; Methylthio [C289]
TGGT1_230940	transcript=TGGT1_230940-t26_1 | gene=TGGT1_230940 | organism=Toxoplasma_gondii_GT1 | gene_product=hypothetical protein | transcript_product=hypothetical protein | location=TGGT1_chrVIII:1112065-1119747(+) | protein_length=1523 | sequence_SO=chromosome | SO=protein_coding_gene | is_pseudo=false	0	FALSE	48.353	14	13	27	13	1523	155.1	9.44	21.22	13	0.973	-0.04	0.992903	4.56777e+06	4.44613e+06	17.75	50.09	2	2	5.1821e+06	4.02627e+06	3.07042e+06	6.43822e+06	4.88959e+06	4.02627e+06	2.68638e+06	3.95398e+06	10	11	9	12	High	High	High	High	1
TGGT1_247230	transcript=TGGT1_247230-t26_1 | gene=TGGT1_247230 | organism=Toxoplasma_gondii_GT1 | gene_product=Centrin [Source:UniProtKB/TrEMBL;Acc:A0A125YHX6] | transcript_product=centrin | location=TGGT1_chrXII:3112753-3115530(+) | protein_length=169 | sequence_SO=chromosome | SO=protein_coding_gene | is_pseudo=false	0.001	FALSE	3.553	5	1	4	1	169	19.3	4.89	0	1	0.973	-0.04	0.992903	1.33081e+06	1.29426e+06	24.43	13.18	2	2	1.58447e+06	1117757	1.42111e+06	1.17874e+06	1495035	1117757	1.24336e+06	723911	1	1	1	1	High	High	High	High	1
TGGT1_297470	transcript=TGGT1_297470-t26_1 | gene=TGGT1_297470 | organism=Toxoplasma_gondii_GT1 | gene_product=EF-hand domain-containing protein [Source:UniProtKB/TrEMBL;Acc:A0A125YSU4] | transcript_product=putative myosin light chain 2 | location=TGGT1_chrII:1781267-1787079(+) | protein_length=367 | sequence_SO=chromosome | SO=protein_coding_gene | is_pseudo=false	0	FALSE	11.128	10	2	2	2	367	40.5	5.54	3.65	2	0.972	-0.04	0.992903	358807	348838	60.21	21.87	2	2	565353	227720	407699	298475	533440	227720	356705	183306	2	2	2	2	High	Peak Found	High	Peak Found	1
TGGT1_204480	transcript=TGGT1_204480-t26_1 | gene=TGGT1_204480 | organism=Toxoplasma_gondii_GT1 | gene_product=Thioredoxin domain-containing protein [Source:UniProtKB/TrEMBL;Acc:S7WA21] | transcript_product=thioredoxin domain-containing protein | location=TGGT1_chrVIIa:1656821-1664723(-) | protein_length=659 | sequence_SO=chromosome | SO=protein_coding_gene | is_pseudo=false	0	FALSE	6.956	5	3	9	3	659	72.1	8.56	3.38	3	0.972	-0.04	0.992903	701139	681319	9.83	54.22	2	2	751685	653991	1.02048e+06	454881	709255	653991	892841	279361	3	3	3	3	High	High	High	High	1	Methylthio [C339]
TGGT1_205510	transcript=TGGT1_205510-t26_1 | gene=TGGT1_205510 | organism=Toxoplasma_gondii_GT1 | gene_product=Nop domain-containing protein [Source:UniProtKB/TrEMBL;Acc:S7UUJ5] | transcript_product=putative nucleolar protein 5 | location=TGGT1_chrVIIa:1272709-1276843(-) | protein_length=490 | sequence_SO=chromosome | SO=protein_coding_gene | is_pseudo=false	0	FALSE	23.895	20	8	18	8	490	54.3	9.04	5.8	8	0.972	-0.04	0.992903	1.88116e+06	1.82792e+06	28.74	34.93	2	2	2.31166e+06	1.53084e+06	2.35232e+06	1.42042e+06	2.18118e+06	1.53084e+06	2.0581e+06	872337	8	7	8	7	High	High	High	Peak Found	1
TGGT1_205380	transcript=TGGT1_205380-t26_1 | gene=TGGT1_205380 | organism=Toxoplasma_gondii_GT1 | gene_product=FBPase domain-containing protein [Source:UniProtKB/TrEMBL;Acc:S7UUI3] | transcript_product=fructose-bisphospatase I | location=TGGT1_chrVIIa:1342975-1346118(+) | protein_length=388 | sequence_SO=chromosome | SO=protein_coding_gene | is_pseudo=false	0	FALSE	17.793	21	7	12	7	388	42.2	8.53	9.78	7	0.971	-0.04	0.992903	1.57629e+06	1.53107e+06	67.88	23.07	2	2	934323	2.65936e+06	1.80502e+06	1.29869e+06	881584	2.65936e+06	1.57926e+06	797581	6	7	7	7	High	High	High	High	1	Methylthio [C344; C368]
TGGT1_263520	transcript=TGGT1_263520-t26_1 | gene=TGGT1_263520 | organism=Toxoplasma_gondii_GT1 | gene_product=Microtubule associated protein SPM1 [Source:UniProtKB/TrEMBL;Acc:S7UXQ8] | transcript_product=microtubule associated protein SPM1 | location=TGGT1_chrVIIb:473105-475119(+) | protein_length=351 | sequence_SO=chromosome | SO=protein_coding_gene | is_pseudo=false	0	FALSE	178.081	54	19	252	19	351	38.7	7.9	579.19	19	0.971	-0.04	0.992903	4.12754e+08	4.00742e+08	14.59	2.84	2	2	3.72152e+08	4.57786e+08	3.92779e+08	4.08866e+08	3.51146e+08	4.57786e+08	3.43652e+08	2.51102e+08	18	20	19	19	High	High	High	High	1	Phospho [S54]; Methylthio [C43; C44; C124; C129; C131; C246; C323]
TGGT1_309120	transcript=TGGT1_309120-t26_1 | gene=TGGT1_309120 | organism=Toxoplasma_gondii_GT1 | gene_product=Ribos_L4_asso_C domain-containing protein [Source:UniProtKB/TrEMBL;Acc:A0A125YTR1] | transcript_product=ribosomal protein RPL4 | location=TGGT1_chrXI:476484-477734(-) | protein_length=416 | sequence_SO=chromosome | SO=protein_coding_gene | is_pseudo=false	0	FALSE	52.935	36	13	66	13	416	45.7	11.18	98.14	13	0.971	-0.04	0.992903	3.76439e+07	3.65427e+07	24.54	24.13	2	2	4.48559e+07	3.15915e+07	4.34142e+07	3.07589e+07	4.23239e+07	3.15915e+07	3.79841e+07	1.88903e+07	12	12	12	12	High	High	High	High	1	Methylthio [C96; C176; C231; C251]
TGGT1_217720	transcript=TGGT1_217720-t26_1 | gene=TGGT1_217720 | organism=Toxoplasma_gondii_GT1 | gene_product=hypothetical protein | transcript_product=hypothetical protein | location=TGGT1_chrXII:1978966-1983186(+) | protein_length=259 | sequence_SO=chromosome | SO=protein_coding_gene | is_pseudo=false	0.052	FALSE	1.621	3	1	1	1	259	28.4	9.76	0	1	0.97	-0.04	0.992903	1.91233e+06	1.85589e+06	50.29	56.81	2	2	2.77355e+06	1.31853e+06	2.84062e+06	1.21253e+06	2.61699e+06	1.31853e+06	2.48532e+06	744665	1	1	1	1	Peak Found	Peak Found	Peak Found	High	1
TGGT1_220270	transcript=TGGT1_220270-t26_1 | gene=TGGT1_220270 | organism=Toxoplasma_gondii_GT1 | gene_product=Alveolin domain containing intermediate filament IMC6 [Source:UniProtKB/TrEMBL;Acc:S7VPD3] | transcript_product=alveolin domain containing intermediate filament IMC6 | location=TGGT1_chrV:152699-154033(-) | protein_length=444 | sequence_SO=chromosome | SO=protein_coding_gene | is_pseudo=false	0	FALSE	164.246	55	15	144	15	444	48.6	5.1	313.68	15	0.968	-0.05	0.992903	2.99822e+08	2.90363e+08	1.09	3.62	2	2	3.02148e+08	2.97514e+08	2.83028e+08	2.97889e+08	2.85093e+08	2.97514e+08	2.47628e+08	1.82946e+08	18	18	18	18	High	High	High	High	1	Phospho [T325; S333; S399; S402; T406; S408; T416]; Methylthio [C89; C90; C125; C294; C359; C365]
TGGT1_224000	transcript=TGGT1_224000-t26_1 | gene=TGGT1_224000 | organism=Toxoplasma_gondii_GT1 | gene_product=hypothetical protein | transcript_product=hypothetical protein | location=TGGT1_chrX:3299753-3302957(-) | protein_length=740 | sequence_SO=chromosome | SO=protein_coding_gene | is_pseudo=false	0	FALSE	57.147	28	16	53	16	740	82.2	5.19	65.14	16	0.968	-0.05	0.992903	1.38055e+07	1.337e+07	1.47	9.85	2	2	1.36627e+07	1.39498e+07	1.43355e+07	1.24695e+07	1.28915e+07	1.39498e+07	1.25425e+07	7.65804e+06	15	16	14	16	High	High	High	High	1	Phospho [S444; S447]; Methylthio [C161; C462]
TGGT1_263200	transcript=TGGT1_263200-t26_1 | gene=TGGT1_263200 | organism=Toxoplasma_gondii_GT1 | gene_product=hypothetical protein | transcript_product=hypothetical protein | location=TGGT1_chrVIIb:691046-700838(+) | protein_length=1082 | sequence_SO=chromosome | SO=protein_coding_gene | is_pseudo=false	0	FALSE	32.92	11	12	27	12	1082	118.4	9.82	26.9	12	0.968	-0.05	0.992903	4.34925e+06	4.21196e+06	6.03	19.69	2	2	4.16766e+06	4.53874e+06	4.8457e+06	3.6611e+06	3.93241e+06	4.53874e+06	4.23961e+06	2.24844e+06	11	12	12	11	High	High	High	High	1	Methylthio [C76]
TGGT1_239770	transcript=TGGT1_239770-t26_1 | gene=TGGT1_239770 | organism=Toxoplasma_gondii_GT1 | gene_product=Alveolin domain containing intermediate filament IMC11 [Source:UniProtKB/TrEMBL;Acc:S7US03] | transcript_product=alveolin domain containing intermediate filament IMC11 | location=TGGT1_chrVI:897071-897965(-) | protein_length=134 | sequence_SO=chromosome | SO=protein_coding_gene | is_pseudo=false	0	FALSE	7.736	20	3	12	3	134	15.6	9.28	7.27	3	0.968	-0.05	0.992903	1.14796e+07	1.11168e+07	3.38	0.8	2	2	1.17571e+07	1.12086e+07	1.11797e+07	1.10541e+07	1.10935e+07	1.12086e+07	9781399	6.78881e+06	2	2	2	3	High	High	High	High	1	Methylthio [C24]
TGGT1_220930	transcript=TGGT1_220930-t26_1 | gene=TGGT1_220930 | organism=Toxoplasma_gondii_GT1 | gene_product=hypothetical protein | transcript_product=hypothetical protein | location=TGGT1_chrII:53649-58945(-) | protein_length=687 | sequence_SO=chromosome | SO=protein_coding_gene | is_pseudo=false	0	FALSE	21.028	14	7	21	7	687	74	5.97	16.11	7	0.968	-0.05	0.992903	3.27976e+06	3.17494e+06	16.33	7.47	2	2	3.68309e+06	2.92059e+06	3.01153e+06	3.34721e+06	3.4752e+06	2.92059e+06	2.63486e+06	2.05566e+06	6	6	5	7	High	High	High	High	1	Methylthio [C120]
TGGT1_232560	transcript=TGGT1_232560-t26_1 | gene=TGGT1_232560 | organism=Toxoplasma_gondii_GT1 | gene_product=hypothetical protein | transcript_product=hypothetical protein | location=TGGT1_chrVIII:2156765-2165546(+) | protein_length=1822 | sequence_SO=chromosome | SO=protein_coding_gene | is_pseudo=false	0.001	FALSE	3.033	1	1	1	1	1822	200.1	8.02	0	1	0.966	-0.05	0.992903	230755	222875	NA	22.09	1	2	230755	NA	190402	260885	217730	NA	166588	160220	1	NA	1	1	Peak Found	Not Found	High	Peak Found	1
TGGT1_230850	transcript=TGGT1_230850-t26_1 | gene=TGGT1_230850 | organism=Toxoplasma_gondii_GT1 | gene_product=hypothetical protein | transcript_product=hypothetical protein | location=TGGT1_chrVIII:1056415-1058913(+) | protein_length=476 | sequence_SO=chromosome | SO=protein_coding_gene | is_pseudo=false	0	FALSE	94.167	38	16	116	16	476	50.5	8.25	277.77	16	0.965	-0.05	0.992903	9.54149e+07	9.20764e+07	9.47	0.44	2	2	8.92247e+07	1.02034e+08	9.2361e+07	9.17926e+07	8.41883e+07	1.02034e+08	8.08088e+07	5.63736e+07	17	17	17	17	High	High	High	High	1	Methylthio [C240; C261]; Phospho [S214]
TGGT1_226870A	transcript=TGGT1_226870A-t26_1 | gene=TGGT1_226870A | organism=Toxoplasma_gondii_GT1 | gene_product=Tubulin gamma chain [Source:UniProtKB/TrEMBL;Acc:S7WCU1] | transcript_product=tubulin gamma chain | location=TGGT1_chrX:1184062-1189107(-) | protein_length=332 | sequence_SO=chromosome | SO=protein_coding_gene | is_pseudo=false	0.001	FALSE	4.732	5	1	4	1	332	37	5.2	2.18	1	0.964	-0.05	0.992903	361088	348115	23.34	26.06	2	2	426537	305682	419446	288914	402460	305682	366983	177434	1	1	1	1	High	High	High	Peak Found	1
TGGT1_309870	transcript=TGGT1_309870-t26_1 | gene=TGGT1_309870 | organism=Toxoplasma_gondii_GT1 | gene_product=PX domain-containing protein [Source:UniProtKB/TrEMBL;Acc:S7W151] | transcript_product=hypothetical protein | location=TGGT1_chrXI:816428-818920(+) | protein_length=830 | sequence_SO=chromosome | SO=protein_coding_gene | is_pseudo=false	0.001	FALSE	3.442	1	1	2	1	830	90.3	7.53	3.75	1	0.964	-0.05	0.992903	518313	499677	61.36	26.09	2	2	824854	325692	602191	414615	778294	325692	526871	254632	1	1	1	1	High	Peak Found	High	Peak Found	1
TGGT1_291820	transcript=TGGT1_291820-t26_1 | gene=TGGT1_291820 | organism=Toxoplasma_gondii_GT1 | gene_product=RNA helicase (UPF2 interacting domain) protein [Source:UniProtKB/TrEMBL;Acc:S7W417] | transcript_product=RNA helicase (UPF2 interacting domain) protein | location=TGGT1_chrIX:4174342-4181401(-) | protein_length=1539 | sequence_SO=chromosome | SO=protein_coding_gene | is_pseudo=false	0.032	FALSE	1.801	1	1	1	1	1539	163.3	6.83	0	1	0.964	-0.05	0.992903	182323	175764	33.52	41.8	2	2	232161	143184	238371	129600	219056	143184	208557	79592.6	1	1	1	1	Peak Found	Peak Found	High	Peak Found	1	Methylthio [C1091]
TGGT1_259550	transcript=TGGT1_259550-t26_1 | gene=TGGT1_259550 | organism=Toxoplasma_gondii_GT1 | gene_product=Pterin-binding domain-containing protein [Source:UniProtKB/TrEMBL;Acc:A0A125YWG2] | transcript_product=dihydropteroate synthase | location=TGGT1_chrVIIb:2750606-2755609(-) | protein_length=748 | sequence_SO=chromosome | SO=protein_coding_gene | is_pseudo=false	0.001	FALSE	3.401	1	1	4	1	748	82.7	6.58	0	1	0.963	-0.05	0.992903	202101	194658	31.22	25.66	2	2	252955	161471	162030	233857	238676	161471	141764	143621	1	1	1	1	High	High	High	High	1
TGGT1_205010	transcript=TGGT1_205010-t26_1 | gene=TGGT1_205010 | organism=Toxoplasma_gondii_GT1 | gene_product=SF3b1 domain-containing protein [Source:UniProtKB/TrEMBL;Acc:S7UUF2] | transcript_product=putative U2 small nuclear ribonucleoprotein family protein | location=TGGT1_chrVIIa:1582142-1590578(-) | protein_length=1386 | sequence_SO=chromosome | SO=protein_coding_gene | is_pseudo=false	0.001	FALSE	4.891	2	2	4	2	1386	150.7	5.95	0	2	0.963	-0.05	0.992903	118541	114151	50	42.7	2	2	171536	81919.4	155892	83586.9	161853	81919.4	136394	51334.2	1	1	1	1	High	High	High	High	1
TGGT1_250820	transcript=TGGT1_250820-t26_1 | gene=TGGT1_250820 | organism=Toxoplasma_gondii_GT1 | gene_product=hypothetical protein | transcript_product=hypothetical protein | location=TGGT1_chrXII:5170586-5175102(+) | protein_length=1156 | sequence_SO=chromosome | SO=protein_coding_gene | is_pseudo=false	0	FALSE	261.757	40	41	267	41	1156	120.8	9.25	596.38	41	0.963	-0.06	0.992903	3.14072e+08	3.02299e+08	6.28	4.79	2	2	3.28344e+08	3.00421e+08	3.12726e+08	2.9222e+08	3.0981e+08	3.00421e+08	2.73611e+08	1.79465e+08	41	44	42	43	High	High	High	High	1	Phospho [S56; S349; S990]; Methylthio [C324; C503; C618; C1003]
TGGT1_307570	transcript=TGGT1_307570-t26_1 | gene=TGGT1_307570 | organism=Toxoplasma_gondii_GT1 | gene_product=Glycerol-3-phosphate dehydrogenase [NAD(+)] [Source:UniProtKB/TrEMBL;Acc:S7UGS8] | transcript_product=putative glycerol-3-phosphate dehydrogenase (gpdh) | location=TGGT1_chrIX:4762720-4767353(-) | protein_length=846 | sequence_SO=chromosome | SO=protein_coding_gene | is_pseudo=false	0.001	FALSE	3.244	1	1	2	1	846	92.4	9.26	0	1	0.962	-0.06	0.992903	880257	846965	23.7	37.9	2	2	1.04255e+06	743226	1.11475e+06	643510	983704	743226	975317	395206	1	1	1	1	High	High	Peak Found	Peak Found	1
TGGT1_292170	transcript=TGGT1_292170-t26_1 | gene=TGGT1_292170 | organism=Toxoplasma_gondii_GT1 | gene_product=Putative histone lysine methyltransferase, SET [Source:UniProtKB/TrEMBL;Acc:S7W470] | transcript_product=putative histone lysine methyltransferase, SET | location=TGGT1_chrIX:4393408-4398896(-) | protein_length=1599 | sequence_SO=chromosome | SO=protein_coding_gene | is_pseudo=false	0	FALSE	6.847	3	3	3	3	1599	175.2	8.98	1.62	3	0.962	-0.06	0.992903	334136	321381	12.85	1.28	2	2	305028	366020	318482	324306	287811	366020	278647	199170	2	3	2	3	High	High	Peak Found	Peak Found	1
TGGT1_258470	transcript=TGGT1_258470-t26_1 | gene=TGGT1_258470 | organism=Toxoplasma_gondii_GT1 | gene_product=hypothetical protein | transcript_product=hypothetical protein | location=TGGT1_chrVIIb:3369823-3371292(+) | protein_length=284 | sequence_SO=chromosome | SO=protein_coding_gene | is_pseudo=false	0	FALSE	82.895	39	8	118	8	284	31.7	7.8	272.21	8	0.962	-0.06	0.992903	2.19665e+08	2.11279e+08	2.21	0.97	2	2	2.23126e+08	2.16257e+08	2.09842e+08	2.12727e+08	2.10531e+08	2.16257e+08	1.83595e+08	1.30644e+08	12	12	12	12	High	High	High	High	1	Phospho [T100; S103; S105; S111; S112; Y113]
TGGT1_217600	transcript=TGGT1_217600-t26_1 | gene=TGGT1_217600 | organism=Toxoplasma_gondii_GT1 | gene_product=Calcium-dependent protein kinase CDPK9 [Source:UniProtKB/TrEMBL;Acc:S7V1I8] | transcript_product=calcium-dependent protein kinase CDPK9 | location=TGGT1_chrXII:1876249-1890897(+) | protein_length=666 | sequence_SO=chromosome | SO=protein_coding_gene | is_pseudo=false	0.001	FALSE	4.182	3	1	1	1	666	75.6	7.27	2.11	1	0.961	-0.06	0.992903	1.28002e+06	1.23058e+06	26.01	14.06	2	2	1.5417e+06	1.06275e+06	1.11372e+06	1.3597e+06	1454675	1.06275e+06	974416	835051	1	1	1	1	Peak Found	Peak Found	High	Peak Found	1
TGGT1_313480	transcript=TGGT1_313480-t26_1 | gene=TGGT1_313480 | organism=Toxoplasma_gondii_GT1 | gene_product=hypothetical protein | transcript_product=hypothetical protein | location=TGGT1_chrXI:3385333-3400705(+) | protein_length=1381 | sequence_SO=chromosome | SO=protein_coding_gene | is_pseudo=false	0	FALSE	166.848	38	39	123	39	1381	152.5	5.62	193.33	39	0.961	-0.06	0.992903	4.20246e+07	4.03931e+07	6.7	17.06	2	2	4.00775e+07	4.40662e+07	3.57818e+07	4.55987e+07	3.78153e+07	4.40662e+07	3.13064e+07	2.8004e+07	34	36	36	37	High	High	High	High	1	Methylthio [C554; C846; C1041]
TGGT1_243250	transcript=TGGT1_243250-t26_1 | gene=TGGT1_243250 | organism=Toxoplasma_gondii_GT1 | gene_product=Myosin motor domain-containing protein [Source:UniProtKB/TrEMBL;Acc:A0A125YQD3] | transcript_product=myosin H | location=TGGT1_chrVI:2380998-2399536(-) | protein_length=1513 | sequence_SO=chromosome | SO=protein_coding_gene | is_pseudo=false	0	FALSE	198.269	39	44	191	44	1513	169.6	9.51	288.6	44	0.96	-0.06	0.992903	9.90769e+07	9.50763e+07	17.24	4.28	2	2	8.76499e+07	1.11994e+08	9.7997e+07	9.22427e+07	8.27024e+07	1.11994e+08	8.57399e+07	5.66501e+07	41	43	42	42	High	High	High	High	1	Methylthio [C98; C178; C724; C996; C1076; C1217; C1219]; Phospho [S20]
TGGT1_243920	transcript=TGGT1_243920-t26_1 | gene=TGGT1_243920 | organism=Toxoplasma_gondii_GT1 | gene_product=MCM domain-containing protein [Source:UniProtKB/TrEMBL;Acc:A0A125YSK7] | transcript_product=putative DNA replication licensing factor MCM5 | location=TGGT1_chrVI:2796800-2806044(+) | protein_length=794 | sequence_SO=chromosome | SO=protein_coding_gene | is_pseudo=false	0	FALSE	25.147	11	9	21	9	794	88.2	8.41	6.88	9	0.958	-0.06	0.992903	1.70612e+07	1.63531e+07	50.51	24.51	2	2	2.47899e+07	1.1742e+07	1.94819e+07	1.37268e+07	2.33906e+07	1.1742e+07	1.70451e+07	8.43021e+06	8	7	8	8	High	High	High	High	1
TGGT1_231815	transcript=TGGT1_231815-t26_1 | gene=TGGT1_231815 | organism=Toxoplasma_gondii_GT1 | gene_product=hypothetical protein | transcript_product=hypothetical protein | location=TGGT1_chrVIII:1552639-1569520(+) | protein_length=3996 | sequence_SO=chromosome | SO=protein_coding_gene | is_pseudo=false	0.04	FALSE	1.714	0	1	2	1	3996	432.3	7.91	3.59	1	0.958	-0.06	0.992903	428326	410538	63.31	64.32	2	2	693419	264577	670640	251314	654278	264577	586758	154343	1	1	1	1	High	Peak Found	High	Peak Found	1
TGGT1_286080	transcript=TGGT1_286080-t26_1 | gene=TGGT1_286080 | organism=Toxoplasma_gondii_GT1 | gene_product=Tr-type G domain-containing protein [Source:UniProtKB/TrEMBL;Acc:S7UP08] | transcript_product=elongation factor 2 family protein | location=TGGT1_chrV:1864243-1874860(+) | protein_length=1008 | sequence_SO=chromosome | SO=protein_coding_gene | is_pseudo=false	0.015	FALSE	2.143	1	1	4	1	1008	113.3	5.2	3.58	1	0.958	-0.06	0.992903	664434	636365	13.81	67.9	2	2	732796	602449	1.07377e+06	377138	691432	602449	939469	231616	1	1	1	1	High	High	High	High	1	Methylthio [C713]
TGGT1_272520	transcript=TGGT1_272520-t26_1 | gene=TGGT1_272520 | organism=Toxoplasma_gondii_GT1 | gene_product=hypothetical protein | transcript_product=hypothetical protein | location=TGGT1_chrVIII:3922939-3924461(+) | protein_length=401 | sequence_SO=chromosome | SO=protein_coding_gene | is_pseudo=false	0	FALSE	81.717	60	17	61	17	401	43.7	5.47	76.88	17	0.957	-0.06	0.992903	1.9868e+07	1.90108e+07	4.51	21.88	2	2	1.92446e+07	2.05116e+07	1.62656e+07	2.22193e+07	1.81583e+07	2.05116e+07	1.42311e+07	1.36458e+07	13	16	13	16	High	High	High	High	1	Methylthio [C71; C117; C232; C235; C241]
TGGT1_230920	transcript=TGGT1_230920-t26_1 | gene=TGGT1_230920 | organism=Toxoplasma_gondii_GT1 | gene_product=MHD domain-containing protein [Source:UniProtKB/TrEMBL;Acc:S7V2R3] | transcript_product=adaptor complexes medium subunit family protein | location=TGGT1_chrVIII:1103744-1106685(+) | protein_length=619 | sequence_SO=chromosome | SO=protein_coding_gene | is_pseudo=false	0	FALSE	14.403	8	4	5	4	619	66.4	9.2	1.85	4	0.957	-0.06	0.992903	1.85024e+06	1.76993e+06	61.36	8.77	2	2	2.94469e+06	1.16256e+06	1.88325e+06	1.66342e+06	2.77847e+06	1.16256e+06	1.6477e+06	1.02158e+06	4	3	3	4	High	High	High	Peak Found	1
TGGT1_226290	transcript=TGGT1_226290-t26_1 | gene=TGGT1_226290 | organism=Toxoplasma_gondii_GT1 | gene_product=hypothetical protein | transcript_product=hypothetical protein | location=TGGT1_chrX:1645559-1647183(-) | protein_length=333 | sequence_SO=chromosome | SO=protein_coding_gene | is_pseudo=false	0	FALSE	16.882	13	4	15	4	333	37.7	7.09	20.48	4	0.956	-0.06	0.992903	2.08302e+06	1.9917e+06	8.64	3.21	2	2	1.95936e+06	2.21448e+06	1.94702e+06	2.03739e+06	1.84876e+06	2.21448e+06	1.7035e+06	1.25125e+06	4	4	4	4	High	High	High	High	1
TGGT1_239790	transcript=TGGT1_239790-t26_1 | gene=TGGT1_239790 | organism=Toxoplasma_gondii_GT1 | gene_product=Pescadillo homolog [Source:UniProtKB/TrEMBL;Acc:S7URT4] | transcript_product=BRCA1 C Terminus (BRCT) domain-containing protein | location=TGGT1_chrVI:904502-910069(+) | protein_length=733 | sequence_SO=chromosome | SO=protein_coding_gene | is_pseudo=false	0.022	FALSE	1.958	2	1	2	1	733	82.1	5.78	0	1	0.956	-0.07	0.992903	108227	103414	14.7	57.67	2	2	120132	97502.1	159440	67075	113351	97502.1	139498	41193.5	1	1	1	1	High	Peak Found	High	Peak Found	1
TGGT1_312050	transcript=TGGT1_312050-t26_1 | gene=TGGT1_312050 | organism=Toxoplasma_gondii_GT1 | gene_product=Putative small GTPase Rab2 [Source:UniProtKB/TrEMBL;Acc:A0A125YL13] | transcript_product=putative small GTPase Rab2 | location=TGGT1_chrXI:2359586-2364079(+) | protein_length=214 | sequence_SO=chromosome | SO=protein_coding_gene | is_pseudo=false	0	FALSE	14.741	23	4	14	4	214	24.2	8.44	12.38	4	0.954	-0.07	0.992903	4.0127e+06	3.82837e+06	34.3	52.62	2	2	5.1394e+06	3.13301e+06	5.65926e+06	2.58981e+06	4.8493e+06	3.13301e+06	4.95142e+06	1.59051e+06	4	4	4	4	High	High	High	High	1
TGGT1_319900	transcript=TGGT1_319900-t26_1 | gene=TGGT1_319900 | organism=Toxoplasma_gondii_GT1 | gene_product=hypothetical protein | transcript_product=hypothetical protein | location=TGGT1_chrIV:622899-634009(-) | protein_length=2426 | sequence_SO=chromosome | SO=protein_coding_gene | is_pseudo=false	0	FALSE	144.891	21	38	111	38	2426	264.7	9.64	121.49	38	0.953	-0.07	0.992903	2.77238e+07	2.64336e+07	3.52	3.11	2	2	2.84222e+07	2.70427e+07	2.70221e+07	2.58579e+07	2.68178e+07	2.70427e+07	2.36423e+07	1.58804e+07	36	35	33	35	High	High	High	High	1	Methylthio [C917; C1340; C1854; C2260; C2277; C2338; C2378]; Phospho [S926; T930; S934]
TGGT1_234420	transcript=TGGT1_234420-t26_1 | gene=TGGT1_234420 | organism=Toxoplasma_gondii_GT1 | gene_product=AAA domain-containing protein [Source:UniProtKB/TrEMBL;Acc:S7W4G4] | transcript_product=ATPase, AAA family protein | location=TGGT1_chrX:4262179-4269625(-) | protein_length=588 | sequence_SO=chromosome | SO=protein_coding_gene | is_pseudo=false	0.001	FALSE	4.3	4	2	2	2	588	66.7	8.76	0	2	0.953	-0.07	0.992903	127372	121357	33.96	14.5	2	2	162722	99701.9	109487	134513	153537	99701.9	95793.1	82610.1	1	1	1	1	High	Peak Found	Peak Found	Peak Found	1
TGGT1_252880A	transcript=TGGT1_252880A-t26_1 | gene=TGGT1_252880A | organism=Toxoplasma_gondii_GT1 | gene_product=G protein gamma domain-containing protein [Source:UniProtKB/TrEMBL;Acc:S7UN56] | transcript_product=hypothetical protein | location=TGGT1_chrIII:633841-640344(-) | protein_length=2167 | sequence_SO=chromosome | SO=protein_coding_gene | is_pseudo=false	0	FALSE	78.029	13	25	59	24	2167	228.4	8.94	79.93	25	0.952	-0.07	0.992856	1.22512e+07	1.16602e+07	5.29	0.32	2	2	1.1801e+07	1.27185e+07	1.16337e+07	1.16869e+07	1.11348e+07	1.27185e+07	1.01786e+07	7.1774e+06	20	21	20	21	High	High	High	High	1	Methylthio [C307]
TGGT1_242790B	transcript=TGGT1_242790B-t26_1 | gene=TGGT1_242790B | organism=Toxoplasma_gondii_GT1 | gene_product=Putative trichohyalin [Source:UniProtKB/TrEMBL;Acc:S7W0Q0] | transcript_product=putative trichohyalin | location=TGGT1_chrVI:2203881-2217509(+) | protein_length=1214 | sequence_SO=chromosome | SO=protein_coding_gene | is_pseudo=false	0	FALSE	77.344	26	22	57	21	1214	137.6	5.11	74.53	22	0.952	-0.07	0.992856	1.5604e+07	1.48492e+07	7.98	6.94	2	2	1.47471e+07	16510697	1.41379e+07	1.55962e+07	1.39146e+07	16510697	1.23695e+07	9.5783e+06	21	21	21	21	High	High	High	High	1	Phospho [S307]
TGGT1_271880	transcript=TGGT1_271880-t26_1 | gene=TGGT1_271880 | organism=Toxoplasma_gondii_GT1 | gene_product=B box-type domain-containing protein [Source:UniProtKB/TrEMBL;Acc:S7V4L3] | transcript_product=B-box zinc finger domain-containing protein | location=TGGT1_chrVIII:4302584-4313626(+) | protein_length=1404 | sequence_SO=chromosome | SO=protein_coding_gene | is_pseudo=false	0	FALSE	28.63	7	8	25	8	1404	156.7	5.21	11.25	8	0.951	-0.07	0.992856	3.59872e+06	3.42349e+06	8.35	11.67	2	2	3.8178e+06	3.3922e+06	3.71867e+06	3.15175e+06	3.6023e+06	3.3922e+06	3.25355e+06	1.93562e+06	7	7	7	7	High	High	High	High	1	Methylthio [C321; C479]
TGGT1_287500	transcript=TGGT1_287500-t26_1 | gene=TGGT1_287500 | organism=Toxoplasma_gondii_GT1 | gene_product=Putative T complex chaperonin [Source:UniProtKB/TrEMBL;Acc:S7UPG8] | transcript_product=putative T complex chaperonin | location=TGGT1_chrV:438209-443517(-) | protein_length=556 | sequence_SO=chromosome | SO=protein_coding_gene | is_pseudo=false	0	FALSE	31.534	20	10	31	10	556	59.3	7.5	28.47	10	0.951	-0.07	0.992856	4.41867e+06	4.20228e+06	1.21	16.53	2	2	4.38099e+06	4.45667e+06	4.72579e+06	3.73676e+06	4.1337e+06	4.45667e+06	4.13471e+06	2.2949e+06	10	10	10	10	High	High	High	High	1
TGGT1_318410	transcript=TGGT1_318410-t26_1 | gene=TGGT1_318410 | organism=Toxoplasma_gondii_GT1 | gene_product=Putative TCP-1 chaperonin [Source:UniProtKB/TrEMBL;Acc:A0A125YLR7] | transcript_product=putative TCP-1 chaperonin | location=TGGT1_chrIV:1295296-1300413(+) | protein_length=537 | sequence_SO=chromosome | SO=protein_coding_gene | is_pseudo=false	0	FALSE	34.826	27	11	29	11	537	58.6	7.08	19.73	11	0.951	-0.07	0.992777	9.19024e+06	8.73584e+06	13.44	13.55	2	2	1.01094e+07	8.35466e+06	9.61712e+06	7.93532e+06	9.53876e+06	8.35466e+06	8.41424e+06	4.87341e+06	10	9	9	9	High	High	High	High	1	Methylthio [C59; C128]
TGGT1_295125	transcript=TGGT1_295125-t26_1 | gene=TGGT1_295125 | organism=Toxoplasma_gondii_GT1 | gene_product=Protein kinase domain-containing protein [Source:UniProtKB/TrEMBL;Acc:S7UI50] | transcript_product=rhoptry protein ROP4 | location=TGGT1_chrIa:1394541-1396277(-) | protein_length=365 | sequence_SO=chromosome | SO=protein_coding_gene | is_pseudo=false	0	FALSE	38.124	24	8	49	2	365	40.1	5.3	69.55	8	0.95	-0.07	0.992777	1.63589e+06	1.55424e+06	38.71	41	2	2	2.16638e+06	1.2353e+06	2.0948e+06	1.15317e+06	2.0441e+06	1.2353e+06	1.83279e+06	708210	2	2	2	2	High	High	High	High	1
TGGT1_320210	transcript=TGGT1_320210-t26_1 | gene=TGGT1_320210 | organism=Toxoplasma_gondii_GT1 | gene_product=WD domain, G-beta repeat domain containing protein [Source:UniProtKB/TrEMBL;Acc:A0A125YIX6] | transcript_product=WD domain, G-beta repeat domain containing protein | location=TGGT1_chrIV:376406-380420(+) | protein_length=515 | sequence_SO=chromosome | SO=protein_coding_gene | is_pseudo=false	0.003	FALSE	2.745	3	1	2	1	515	56	7.46	0	1	0.95	-0.07	0.992777	177193	168293	29.86	8.03	2	2	219559	143002	178139	158991	207165	143002	155858	97643.2	1	1	1	1	High	Peak Found	High	Peak Found	1
TGGT1_235340	transcript=TGGT1_235340-t26_1 | gene=TGGT1_235340 | organism=Toxoplasma_gondii_GT1 | gene_product=hypothetical protein | transcript_product=hypothetical protein | location=TGGT1_chrX:4675810-4681430(+) | protein_length=720 | sequence_SO=chromosome | SO=protein_coding_gene | is_pseudo=false	0	FALSE	54.253	29	16	50	16	720	76.6	7.66	61.02	16	0.949	-0.07	0.992777	1.05432e+07	1.001e+07	21.39	21.25	2	2	1.22792e+07	9.05258e+06	8.60357e+06	1.16463e+07	1.15861e+07	9.05258e+06	7.52746e+06	7.15247e+06	14	14	14	15	High	High	High	High	1	Methylthio [C70; C99; C148; C222; C306; C485]
TGGT1_278780	transcript=TGGT1_278780-t26_1 | gene=TGGT1_278780 | organism=Toxoplasma_gondii_GT1 | gene_product=Ubiquitin-like domain-containing protein [Source:UniProtKB/TrEMBL;Acc:S7W8B0] | transcript_product=hypothetical protein | location=TGGT1_chrXII:5793913-5797545(+) | protein_length=433 | sequence_SO=chromosome | SO=protein_coding_gene | is_pseudo=false	0	FALSE	51.135	32	11	53	11	433	45.8	6.32	81.88	11	0.949	-0.07	0.992777	2.29699e+07	2.18067e+07	7.24	14.09	2	2	2.18226e+07	2.41774e+07	1.97324e+07	2.40991e+07	2.05908e+07	2.41774e+07	1.72644e+07	1.48003e+07	10	11	10	11	High	High	High	High	1	Methylthio [C50; C99; C403]
TGGT1_267810	transcript=TGGT1_267810-t26_1 | gene=TGGT1_267810 | organism=Toxoplasma_gondii_GT1 | gene_product=Rab 5 [Source:UniProtKB/TrEMBL;Acc:S7UHL9] | transcript_product=Rab 5 | location=TGGT1_chrIX:174026-177378(+) | protein_length=241 | sequence_SO=chromosome | SO=protein_coding_gene | is_pseudo=false	0.001	FALSE	5.609	8	2	8	1	241	26.5	6.14	13.54	2	0.948	-0.08	0.992622	143326	135893	46.21	61.35	2	2	201204	102097	216256	85394.1	189847	102097	189207	52444.1	1	1	1	1	High	Peak Found	High	Peak Found	1
TGGT1_297210	transcript=TGGT1_297210-t26_1 | gene=TGGT1_297210 | organism=Toxoplasma_gondii_GT1 | gene_product=hypothetical protein | transcript_product=hypothetical protein | location=TGGT1_chrII:1581868-1595298(+) | protein_length=3985 | sequence_SO=chromosome | SO=protein_coding_gene | is_pseudo=false	0.001	FALSE	5.526	1	3	5	3	3985	444.7	6.29	0	3	0.948	-0.08	0.992622	524435	497127	27.22	12.85	2	2	637307	431554	544554	453831	601334	431554	476444	278716	3	2	3	2	High	High	High	Peak Found	1	Methylthio [C3243]
TGGT1_229260	transcript=TGGT1_229260-t26_1 | gene=TGGT1_229260 | organism=Toxoplasma_gondii_GT1 | gene_product=hypothetical protein | transcript_product=hypothetical protein | location=TGGT1_chrVIII:112028-122410(-) | protein_length=3460 | sequence_SO=chromosome | SO=protein_coding_gene | is_pseudo=false	0	FALSE	36.502	4	10	18	10	3460	363.6	5.77	8.49	10	0.947	-0.08	0.992622	1.49939e+06	1.42062e+06	39.67	10.25	2	2	2.00027e+06	1.12393e+06	1.52757e+06	1.32117e+06	1.88736e+06	1.12393e+06	1.3365e+06	811384	8	7	8	7	High	High	High	High	1
TGGT1_295360	transcript=TGGT1_295360-t26_1 | gene=TGGT1_295360 | organism=Toxoplasma_gondii_GT1 | gene_product=hypothetical protein | transcript_product=hypothetical protein | location=TGGT1_chrIa:1791407-1792949(+) | protein_length=268 | sequence_SO=chromosome | SO=protein_coding_gene | is_pseudo=false	0	FALSE	121.041	77	19	145	19	268	29.5	7.08	208.44	19	0.947	-0.08	0.992622	1.51438e+08	1.43452e+08	17.04	1.28	2	2	1.70924e+08	1.34173e+08	1.42154e+08	1.44761e+08	1.61276e+08	1.34173e+08	1.24374e+08	8.89038e+07	24	25	25	24	High	High	High	High	1	Methylthio [C57; C120; C204]; Phospho [S24; S40; S58; T59; S65; S134; S143; S150; S161; T209; S212; S220]
TGGT1_253470	transcript=TGGT1_253470-t26_1 | gene=TGGT1_253470 | organism=Toxoplasma_gondii_GT1 | gene_product=Alveolin domain containing intermediate filament IMC13 [Source:UniProtKB/TrEMBL;Acc:A0A125YG71] | transcript_product=alveolin domain containing intermediate filament IMC13 | location=TGGT1_chrIII:956404-958611(+) | protein_length=398 | sequence_SO=chromosome | SO=protein_coding_gene | is_pseudo=false	0	FALSE	29.509	14	5	31	5	398	45.8	5.1	66.77	5	0.947	-0.08	0.992622	2.41551e+07	2.28768e+07	6.2	5.29	2	2	2.52375e+07	2.31192e+07	2.20366e+07	2.37491e+07	2.38129e+07	2.31192e+07	19280370	14585298	5	5	5	5	High	High	High	High	1	Methylthio [C388]
TGGT1_244500	transcript=TGGT1_244500-t26_1 | gene=TGGT1_244500 | organism=Toxoplasma_gondii_GT1 | gene_product=Tubulin-tyrosine ligase family protein [Source:UniProtKB/TrEMBL;Acc:S7UFX3] | transcript_product=Tubulin-tyrosine ligase family protein | location=TGGT1_chrVI:3224108-3234719(-) | protein_length=2376 | sequence_SO=chromosome | SO=protein_coding_gene | is_pseudo=false	0.056	FALSE	1.579	0	1	1	1	2376	259.8	8.07	0	1	0.947	-0.08	0.992622	267795	253583	47.72	NA	2	1	380460	188494	NA	253583	358984	188494	NA	155736	1	1	NA	1	High	Peak Found	Not Found	Peak Found	1
TGGT1_288840	transcript=TGGT1_288840-t26_1 | gene=TGGT1_288840 | organism=Toxoplasma_gondii_GT1 | gene_product=hypothetical protein | transcript_product=hypothetical protein | location=TGGT1_chrIX:2574137-2576083(+) | protein_length=648 | sequence_SO=chromosome | SO=protein_coding_gene | is_pseudo=false	0	FALSE	8.396	5	4	8	4	648	70.8	9.13	1.68	4	0.947	-0.08	0.992622	889348	841904	15.05	69.35	2	2	799271	989576	1.43972e+06	492320	754155	989576	1.25964e+06	302354	3	4	4	3	High	High	High	Peak Found	1
TGGT1_261250	transcript=TGGT1_261250-t26_1 | gene=TGGT1_261250 | organism=Toxoplasma_gondii_GT1 | gene_product=Histone H2A [Source:UniProtKB/TrEMBL;Acc:S7UYT4] | transcript_product=histone H2A1 | location=TGGT1_chrVIIb:1779724-1780266(-) | protein_length=180 | sequence_SO=chromosome | SO=protein_coding_gene | is_pseudo=false	0	FALSE	12.597	18	2	17	1	180	19.5	10.2	31.12	2	0.946	-0.08	0.992622	6.5717e+06	6.21822e+06	65.87	40.87	2	2	1.08854e+07	3.96743e+06	4.61834e+06	8.37234e+06	1.0271e+07	3.96743e+06	4.04069e+06	5.1418e+06	2	2	2	2	High	High	High	High	1
TGGT1_225020	transcript=TGGT1_225020-t26_1 | gene=TGGT1_225020 | organism=Toxoplasma_gondii_GT1 | gene_product=hypothetical protein | transcript_product=hypothetical protein | location=TGGT1_chrX:2489451-2494003(-) | protein_length=1010 | sequence_SO=chromosome | SO=protein_coding_gene | is_pseudo=false	0	FALSE	86.868	30	26	82	26	1010	114.4	9.04	88.06	26	0.945	-0.08	0.992622	1.97672e+07	1.86819e+07	26	28.46	2	2	1.64124e+07	2.38078e+07	1.52339e+07	2.29104e+07	1.5486e+07	2.38078e+07	1.33285e+07	1.40702e+07	24	25	24	26	High	High	High	High	1	Methylthio [C14; C230; C241; C521; C570; C604]
TGGT1_254120	transcript=TGGT1_254120-t26_1 | gene=TGGT1_254120 | organism=Toxoplasma_gondii_GT1 | gene_product=Autophagy-related protein [Source:UniProtKB/TrEMBL;Acc:A0A125YKY5] | transcript_product=putative autophagy-related protein 8 atg8 | location=TGGT1_chrIII:1439044-1440837(+) | protein_length=124 | sequence_SO=chromosome | SO=protein_coding_gene | is_pseudo=false	0.001	FALSE	4.252	19	2	3	2	124	14.2	7.5	0	2	0.945	-0.08	0.992622	823837	778288	21.19	32.79	2	2	958095	708393	985630	614563	904014	708393	862351	377429	2	2	2	2	High	Peak Found	High	Peak Found	1	Methylthio [C32; C70]
TGGT1_300310	transcript=TGGT1_300310-t26_1 | gene=TGGT1_300310 | organism=Toxoplasma_gondii_GT1 | gene_product=AAA domain-containing protein [Source:UniProtKB/TrEMBL;Acc:S7UGY0] | transcript_product=26S proteasome regulatory subunit, S6a family AAA ATpase | location=TGGT1_chrXII:55218-62332(-) | protein_length=427 | sequence_SO=chromosome | SO=protein_coding_gene | is_pseudo=false	0	FALSE	10.277	13	3	5	3	427	47.8	5.3	0	3	0.944	-0.08	0.992486	419131	395643	29.31	3.89	2	2	517238	339632	406677	384909	488041	339632	355811	236388	2	3	3	2	High	Peak Found	High	High	1
TGGT1_261580	transcript=TGGT1_261580-t26_1 | gene=TGGT1_261580 | organism=Toxoplasma_gondii_GT1 | gene_product=Histone H2A [Source:UniProtKB/TrEMBL;Acc:A0A125YFR2] | transcript_product=histone H2AX | location=TGGT1_chrVIIb:1624096-1624503(-) | protein_length=135 | sequence_SO=chromosome | SO=protein_coding_gene | is_pseudo=false	0.026	FALSE	1.902	7	1	2	1	135	14.5	10.56	1.68	1	0.944	-0.08	0.992486	1.67673e+06	1.5825e+06	81.02	32.3	2	2	3.21765e+06	873753	1.25422e+06	1.99669e+06	3036023	873753	1.09735e+06	1.22625e+06	1	1	1	1	Peak Found	High	Peak Found	High	1
TGGT1_233520	transcript=TGGT1_233520-t26_1 | gene=TGGT1_233520 | organism=Toxoplasma_gondii_GT1 | gene_product=ATP-dependent RNA helicase [Source:UniProtKB/TrEMBL;Acc:S7V2Z5] | transcript_product=ATP-dependent RNA helicase | location=TGGT1_chrVIII:2686087-2689735(+) | protein_length=801 | sequence_SO=chromosome | SO=protein_coding_gene | is_pseudo=false	0	FALSE	14.954	5	3	9	3	801	88.8	7.68	21.87	3	0.943	-0.09	0.992218	3.84667e+06	3.62621e+06	40.67	70.5	2	2	5.1715e+06	2.86123e+06	6.26814e+06	2.09781e+06	4.87959e+06	2.86123e+06	5.48415e+06	1.28835e+06	3	3	3	2	High	High	High	High	1
TGGT1_218580	transcript=TGGT1_218580-t26_1 | gene=TGGT1_218580 | organism=Toxoplasma_gondii_GT1 | gene_product=SpoU_methylase domain-containing protein [Source:UniProtKB/TrEMBL;Acc:S7V1D0] | transcript_product=RNA methyltransferase, TrmH family protein | location=TGGT1_chrXII:1343203-1357999(+) | protein_length=2905 | sequence_SO=chromosome | SO=protein_coding_gene | is_pseudo=false	0.053	FALSE	1.6	0	1	3	1	2905	311.4	6.46	0	1	0.941	-0.09	0.991615	1.46518e+06	1.37881e+06	25.52	3.16	2	2	1.22085e+06	1.75841e+06	1.40993e+06	1.34837e+06	1.15194e+06	1.75841e+06	1.23358e+06	828090	1	1	1	1	High	High	High	Peak Found	1
TGGT1_208030	transcript=TGGT1_208030-t26_1 | gene=TGGT1_208030 | organism=Toxoplasma_gondii_GT1 | gene_product=Microneme protein MIC4 [Source:UniProtKB/TrEMBL;Acc:A0A125YP10] | transcript_product=microneme protein MIC4 | location=TGGT1_chrIb:547335-549077(+) | protein_length=580 | sequence_SO=chromosome | SO=protein_coding_gene | is_pseudo=false	0	FALSE	51.313	29	14	57	14	580	63	5.22	48.06	14	0.939	-0.09	0.988827	1.93799e+07	1.81892e+07	51.79	16.46	2	2	2.84539e+07	1.31996e+07	1.6182e+07	2.04453e+07	2.68478e+07	1.31996e+07	1.4158e+07	1.25563e+07	14	14	14	14	High	High	High	High	1	Methylthio [C68; C93; C97; C214; C267; C380; C466; C488; C492; C539; C565]
TGGT1_261440	transcript=TGGT1_261440-t26_1 | gene=TGGT1_261440 | organism=Toxoplasma_gondii_GT1 | gene_product=ARM repeats containing protein [Source:UniProtKB/TrEMBL;Acc:A0A125YNN4] | transcript_product=ARM repeats containing protein | location=TGGT1_chrVIIb:1723817-1729239(+) | protein_length=274 | sequence_SO=chromosome | SO=protein_coding_gene | is_pseudo=false	0	FALSE	6.567	9	2	2	2	274	30.5	5.11	2.19	2	0.938	-0.09	0.988605	307051	288052	71.85	26.2	2	2	537593	175375	347423	238828	507248	175375	303968	146674	2	2	2	2	High	Peak Found	Peak Found	Peak Found	1
[truncated: 421 more rows]

## Sheet: 2.2_TurboID_SPARKEL
Protein_ID	Description	Exp.q.value.Combined	Contaminant	Sum.PEP.Score	Coverage.in.Percent	Number.of.Peptides	Number.of.PSMs	Number.of.Unique.Peptides	Number.of.AAs	MW.in.kDa	calc.pI	Score.Sequest.HT.Sequest.HT	Number.of.Peptides.by.Search.Engine.Sequest.HT	Abundance.Ratio.tgALH493..tgALH184	Abundance.Ratio.log2.tgALH493..tgALH184	Abundance.Ratio.Adj.P.Value.tgALH493..tgALH184	Abundances.Grouped.tgALH184	Abundances.Grouped.tgALH493	Abundances.Grouped.CV.in.Percent.tgALH184	Abundances.Grouped.CV.in.Percent.tgALH493	Abundances.Normalized.F106.Sample.tgALH184.R1.intracellular.na.na	Abundances.Normalized.F107.Sample.tgALH184.R2.intracellular.na.na	Abundances.Normalized.F104.Sample.tgALH493.R1.intracellular.na.na	Abundances.Normalized.F105.Sample.tgALH493.R2.intracellular.na.na	Found.in.Sample.in.S104.F106.Sample.tgALH184.R1.intracellular.na.na	Found.in.Sample.in.S105.F107.Sample.tgALH184.R2.intracellular.na.na	Found.in.Sample.in.S102.F104.Sample.tgALH493.R1.intracellular.na.na	Found.in.Sample.in.S103.F105.Sample.tgALH493.R2.intracellular.na.na	Number.of.Protein.Groups	Modifications
[truncated: 1,870 more rows]

[truncated: 1 more sheets: 2.3_SPARK_TurboID]
