# Supplementary material for: SPARK regulates AGC kinases central to the Toxoplasma gondii asexual cycle
Source: bioRxiv preprint, doi:10.1101/2023.10.30.564746, version 2 (2024-05-02)
Supplement: Supplementary File 3 [file 564746_file05.xlsx]

## Sheet: 3.1_SPARK_0vs24_depletion
Protein_ID	Protein.FDR.Confidence.Combined	Master	Annotation	Description	Exp.q.value.Combined	Sum.PEP.Score	Coverage.in.Percent	Number.of.Peptides	Number.of.PSMs	Number.of.Unique.Peptides	Number.of.AAs	MW.in.kDa	calc.pI	Score.Sequest.HT.Sequest.HT	Number.of.Peptides.by.Search.Engine.Sequest.HT	Abundance.Ratio.IAA..PBS	Abundance.Ratio.log2.IAA..PBS	Abundance.Ratio.Adj.P.Value.IAA..PBS	Abundances.Grouped.IAA	Abundances.Grouped.PBS	Abundances.Grouped.CV.in.Percent.IAA	Abundances.Grouped.CV.in.Percent.PBS	Abundances.Normalized.F1.130C.Sample.IAA.R1.1	Abundances.Normalized.F1.131N.Sample.IAA.R2.1	Abundances.Normalized.F1.131C.Sample.IAA.R1.2	Abundances.Normalized.F1.132N.Sample.IAA.R2.2	Abundances.Normalized.F1.132C.Sample.IAA.R1.3	Abundances.Normalized.F1.133N.Sample.IAA.R2.3	Abundances.Normalized.F1.133C.Sample.IAA.R1.4	Abundances.Normalized.F1.134N.Sample.IAA.R2.4	Abundances.Normalized.F1.126.Sample.PBS.R1.1	Abundances.Normalized.F1.127N.Sample.PBS.R2.1	Abundances.Normalized.F1.127C.Sample.PBS.R1.2	Abundances.Normalized.F1.128N.Sample.PBS.R2.2	Abundances.Normalized.F1.128C.Sample.PBS.R1.3	Abundances.Normalized.F1.129N.Sample.PBS.R2.3	Abundances.Normalized.F1.129C.Sample.PBS.R1.4	Abundances.Normalized.F1.130N.Sample.PBS.R2.4	Number.of.Protein.Groups	Modifications
TGGT1_312330	High	IsMasterProtein	TGGT1_312330-t26_1-p1	transcript=TGGT1_312330-t26_1 | gene=TGGT1_312330 | organism=Toxoplasma_gondii_GT1 | gene_product=hypothetical protein | transcript_product=hypothetical protein | location=TGGT1_chrXI:2565427-2580462(-) | protein_length=1893 | sequence_SO=chromosome | SO=protein_coding_gene | is_pseudo=false	0	14.623	2	5	7	4	1893	208.2	7.66	16.67	5	4.011	2	6.58931e-09	180.5	45	14.91	12.7	154.4	202.1	154.2	202.7	161.2	209.3	153.3	208.9	42.4	39.1	44.7	55.3	39.8	45.3	52.6	48.9	1
TGGT1_207150	High	IsMasterProtein	TGGT1_207150-t26_1-p1	transcript=TGGT1_207150-t26_1 | gene=TGGT1_207150 | organism=Toxoplasma_gondii_GT1 | gene_product=SAG-related sequence SRS49C [Source:UniProtKB/TrEMBL;Acc:S7UPR0] | transcript_product=SAG-related sequence SRS49C | location=TGGT1_chrX:7289380-7290666(-) | protein_length=373 | sequence_SO=chromosome | SO=protein_coding_gene | is_pseudo=false	0	9.74	6	2	4	2	373	39.4	6.1	10.22	2	2.951	1.56	9.23319e-08	236.2	80	6.65	13.36	232.8	240.5	206.1	251.7	240.6	215.9	220.6	239.7	70.9	81.4	77.9	87.5	81	103.1	67.7	79.1	1
TGGT1_208740	High	IsMasterProtein	TGGT1_208740-t26_1-p1	transcript=TGGT1_208740-t26_1 | gene=TGGT1_208740 | organism=Toxoplasma_gondii_GT1 | gene_product=Putative microneme protein [Source:UniProtKB/TrEMBL;Acc:S7UIK4] | transcript_product=putative microneme protein | location=TGGT1_chrIb:855333-858141(-) | protein_length=609 | sequence_SO=chromosome | SO=protein_coding_gene | is_pseudo=false	0.001	6.07	3	2	2	2	609	66.3	7.8	5.76	2	2.791	1.48	2.58287e-09	96.3	34.5	9.71	10.4	119.6	106.8	95	92.3	94.9	108.9	92.6	97.7	33.8	37.7	38.3	35.3	31.9	40.1	32.4	29.5	1
TGGT1_207210	High	IsMasterProtein	TGGT1_207210-t26_1-p1	transcript=TGGT1_207210-t26_1 | gene=TGGT1_207210 | organism=Toxoplasma_gondii_GT1 | gene_product=hypothetical protein | transcript_product=hypothetical protein | location=TGGT1_chrX:7324139-7324471(+) | protein_length=110 | sequence_SO=chromosome | SO=protein_coding_gene | is_pseudo=false	0.005	3.238	8	1	1	1	110	13	7.69	3.31	1	2.513	1.33	2.88418e-08	170.1	67.7	5.89	10.88	167.5	157.1	152.9	172.7	163.7	178.3	175.6	179.9	67.6	67.9	68.8	84.9	62.4	60.9	64.2	67.8	1
TGGT1_268010	Medium	IsMasterProtein	TGGT1_268010-t26_1-p1	transcript=TGGT1_268010-t26_1 | gene=TGGT1_268010 | organism=Toxoplasma_gondii_GT1 | gene_product=hypothetical protein | transcript_product=hypothetical protein | location=TGGT1_chrVIII:6705136-6717647(-) | protein_length=4032 | sequence_SO=chromosome | SO=protein_coding_gene | is_pseudo=false	0.01	2.703	1	2	3	2	4032	434.2	8.85	1.83	2	2.405	1.27	0.00474691	175.8	73.1	30.75	28.09	200.4	179.2	172.4	148.3	188.3	52.5	218.8	157	44.4	93	49.1	78.3	68.2	81.2	47.6	87.2	1
TGGT1_260190	High	IsMasterProtein	TGGT1_260190-t26_1-p1	transcript=TGGT1_260190-t26_1 | gene=TGGT1_260190 | organism=Toxoplasma_gondii_GT1 | gene_product=Microneme protein MIC13 [Source:UniProtKB/TrEMBL;Acc:S7UYL3] | transcript_product=microneme protein MIC13 | location=TGGT1_chrVIIb:2444928-2447434(+) | protein_length=468 | sequence_SO=chromosome | SO=protein_coding_gene | is_pseudo=false	0	8.398	9	4	4	4	468	51.4	6.33	4.03	4	2.346	1.23	2.58287e-09	231.1	98.5	5.18	7.88	241.8	225.7	221.2	218.9	255.6	235	234.8	227.4	97.6	111.6	98	103.5	94	99	116.9	96.7	1
TGGT1_301222	Low	IsMasterProtein	TGGT1_301222-t26_1-p1	transcript=TGGT1_301222-t26_1 | gene=TGGT1_301222 | organism=Toxoplasma_gondii_GT1 | gene_product=DNA repair protein Rad4 domain-containing protein [Source:UniProtKB/TrEMBL;Acc:S7UHK7] | transcript_product=DNA repair protein Rad4 domain-containing protein | location=TGGT1_chrIV:2210865-2219721(+) | protein_length=1911 | sequence_SO=chromosome | SO=protein_coding_gene | is_pseudo=false	0.067	1.271	0	1	1	1	1911	207.3	8.38	0	1	2.283	1.19	0.00364759	103.7	45.4	36.15	15.79	58.8	137.1	69.2	150.3	80.8	133.1	71.3	136.8	42	56.3	43.7	59.7	39.3	49.1	40.5	47.3	1
TGGT1_207160	High	IsMasterProtein	TGGT1_207160-t26_1-p1	transcript=TGGT1_207160-t26_1 | gene=TGGT1_207160 | organism=Toxoplasma_gondii_GT1 | gene_product=SAG-related sequence SRS49D [Source:UniProtKB/TrEMBL;Acc:A0A125YUC2] | transcript_product=SAG-related sequence SRS49D | location=TGGT1_chrX:7293195-7294422(-) | protein_length=365 | sequence_SO=chromosome | SO=protein_coding_gene | is_pseudo=false	0.001	6.159	5	2	2	2	365	38.1	6.71	4.29	2	2.193	1.13	5.31974e-10	200.4	91.4	5.91	6.63	199.7	198.8	206.1	201.7	201	185.7	182.5	220.5	80.6	93.3	93.6	89.4	81.9	93.7	86.1	96.4	1
TGGT1_288730	Low	IsMasterProtein	TGGT1_288730-t26_1-p1	transcript=TGGT1_288730-t26_1 | gene=TGGT1_288730 | organism=Toxoplasma_gondii_GT1 | gene_product=DNA_pol_B_palm domain-containing protein [Source:UniProtKB/TrEMBL;Acc:S7UPJ2] | transcript_product=hypothetical protein | location=TGGT1_chrIX:2522055-2526406(+) | protein_length=1105 | sequence_SO=chromosome | SO=protein_coding_gene | is_pseudo=false	0.077	1.206	1	1	1	1	1105	121.5	9.85	0	1	2.138	1.1	0.000266715	26.2	12.2	24.85	24.53	33.2	19.2	31.8	21.2	26.5	25.9	40	23.9	10.7	14.7	8.2	10.2	11.6	12.9	17.3	16.1	1
TGGT1_306455	High	IsMasterProtein	TGGT1_306455-t26_1-p1	transcript=TGGT1_306455-t26_1 | gene=TGGT1_306455 | organism=Toxoplasma_gondii_GT1 | gene_product=hypothetical protein | transcript_product=hypothetical protein | location=TGGT1_chrIX:5874608-5874862(+) | protein_length=84 | sequence_SO=chromosome | SO=protein_coding_gene | is_pseudo=false	0.006	3.037	12	1	2	1	84	9.7	9.7	4.96	1	2.044	1.03	1.56287e-06	125.4	61.3	14.49	10.75	116.1	159.3	111.2	127.9	122.9	141.4	121.7	161.5	60.1	75.5	56.1	71	59	67.2	58.3	62.6	1
TGGT1_210095	High	IsMasterProtein	TGGT1_210095-t26_1-p1	transcript=TGGT1_210095-t26_1 | gene=TGGT1_210095 | organism=Toxoplasma_gondii_GT1 | gene_product=hypothetical protein | transcript_product=hypothetical protein | location=TGGT1_chrIb:1629844-1631103(-) | protein_length=365 | sequence_SO=chromosome | SO=protein_coding_gene | is_pseudo=false	0	26.848	28	7	20	3	365	38.6	8.75	40.47	7	2.03	1.02	0.000188342	697.8	343.7	22.3	15.55	554.8	852.5	528	839.4	542.6	835.3	582.9	837.1	288.3	393.5	320.1	369.1	319	407.8	278	414.4	1
TGGT1_314250	High	IsMasterProtein	TGGT1_314250-t26_1-p1	transcript=TGGT1_314250-t26_1 | gene=TGGT1_314250 | organism=Toxoplasma_gondii_GT1 | gene_product=Bradyzoite rhoptry protein BRP1 [Source:UniProtKB/TrEMBL;Acc:S7UU17] | transcript_product=bradyzoite rhoptry protein BRP1 | location=TGGT1_chrXI:3925474-3925962(+) | protein_length=162 | sequence_SO=chromosome | SO=protein_coding_gene | is_pseudo=false	0.001	7.06	12	4	5	4	162	17.9	9.79	8.59	4	2.031	1.02	8.26362e-05	596.3	293.5	21.07	16.15	503.9	749.5	515.8	751	482.4	689.4	454.5	699.2	261.2	338.5	254.8	358.8	224.3	317.3	271.6	327.1	1
TGGT1_253330	High	IsMasterProtein	TGGT1_253330-t26_1-p1	transcript=TGGT1_253330-t26_1 | gene=TGGT1_253330 | organism=Toxoplasma_gondii_GT1 | gene_product=Protein kinase domain-containing protein [Source:UniProtKB/TrEMBL;Acc:S7UMR4] | transcript_product=Rhoptry kinase family protein | location=TGGT1_chrIII:839240-840807(-) | protein_length=377 | sequence_SO=chromosome | SO=protein_coding_gene | is_pseudo=false	0.005	3.206	2	1	1	1	377	42.2	8.7	3.37	1	2.002	1	6.14833e-06	71.9	35.9	13.03	14.03	75.1	70.7	67.9	75.7	61.3	76.7	50.5	73.2	38.9	30.4	37.5	35.4	31.4	26.8	41.5	36.4	1
TGGT1_264660	High	IsMasterProtein	TGGT1_264660-t26_1-p1	transcript=TGGT1_264660-t26_1 | gene=TGGT1_264660 | organism=Toxoplasma_gondii_GT1 | gene_product=SAG-related sequence SRS44 [Source:UniProtKB/TrEMBL;Acc:S7VP87] | transcript_product=SAG-related sequence SRS44 | location=TGGT1_chrIX:1955976-1963333(+) | protein_length=2359 | sequence_SO=chromosome | SO=protein_coding_gene | is_pseudo=false	0	161.235	21	45	78	45	2359	251.8	8.02	200.44	45	1.961	0.97	3.29313e-07	9657.3	4923.6	9.2	4.4	9019.8	10609.9	8658.5	10513.4	8776.3	10339.8	8876.3	10450.8	4623.9	5157	4833.3	5194.5	4831	5053.4	4660.5	5015.5	1	Methylthio [C193; C341; C793; C1183; C1535; C1645; C1755]
TGGT1_410610	High	IsMasterProtein	TGGT1_410610-t26_1-p1	transcript=TGGT1_410610-t26_1 | gene=TGGT1_410610 | organism=Toxoplasma_gondii_GT1 | gene_product=Protein kinase domain-containing protein [Source:UniProtKB/TrEMBL;Acc:S7VXS4] | transcript_product=hypothetical protein | location=AAQM03000304:1400-3338(-) | protein_length=248 | sequence_SO=contig | SO=protein_coding_gene | is_pseudo=false	0	15.519	15	3	13	2	248	26.8	11.37	28.62	3	1.93	0.95	4.11337e-06	488.3	253	13.6	9.09	438	560.1	409.7	548.2	440.5	544.4	417.1	541.4	218.6	283.1	236.9	280.9	251.5	273.4	238.1	254.4	1
TGGT1_222370	High	IsMasterProtein	TGGT1_222370-t26_1-p1	transcript=TGGT1_222370-t26_1 | gene=TGGT1_222370 | organism=Toxoplasma_gondii_GT1 | gene_product=SAG-related sequence SRS13 [Source:UniProtKB/TrEMBL;Acc:S7UKA0] | transcript_product=SAG-related sequence SRS13 | location=TGGT1_chrII:1060771-1063176(+) | protein_length=801 | sequence_SO=chromosome | SO=protein_coding_gene | is_pseudo=false	0	20.02	12	7	9	7	801	82.7	4.74	22.33	7	1.848	0.89	2.58287e-09	1326.2	717.7	4.11	5.7	1313.6	1379.3	1223.9	1355.1	1285.8	1338.9	1259.4	1357.6	699.8	758.6	659.6	749.4	656.2	733.4	702.3	750.4	1
TGGT1_248180	High	IsMasterProtein	TGGT1_248180-t26_1-p1	transcript=TGGT1_248180-t26_1 | gene=TGGT1_248180 | organism=Toxoplasma_gondii_GT1 | gene_product=hypothetical protein | transcript_product=hypothetical protein | location=TGGT1_chrXII:3662064-3663294(+) | protein_length=173 | sequence_SO=chromosome | SO=protein_coding_gene | is_pseudo=false	0	28.607	68	8	11	8	173	17.6	4.84	30.8	8	1.849	0.89	0.00234389	573.4	310.1	21.85	23.81	564.7	642.5	439.4	582.2	503.1	301.3	649.1	587.9	209.3	398.3	230.5	309.6	314.9	310.6	223.8	378.2	1
TGGT1_290970	High	IsMasterProtein	TGGT1_290970-t26_1-p1	transcript=TGGT1_290970-t26_1 | gene=TGGT1_290970 | organism=Toxoplasma_gondii_GT1 | gene_product=Aminotran_1_2 domain-containing protein [Source:UniProtKB/TrEMBL;Acc:S7VXX9] | transcript_product=8-amino-7-oxononanoate synthase | location=TGGT1_chrIX:3811046-3812950(-) | protein_length=577 | sequence_SO=chromosome | SO=protein_coding_gene | is_pseudo=false	0	35.306	18	10	14	9	577	64.7	8.63	42.99	10	1.827	0.87	6.59611e-09	2032.2	1112.2	4.96	2.5	2060.5	1940.3	2155.8	1896.5	2021.2	2043.2	2117.2	1883.7	1128.2	1113.7	1092.2	1113.3	1111	1074.1	1168.1	1099.3	1
TGGT1_411760	High	IsMasterProtein	TGGT1_411760-t26_1-p1	transcript=TGGT1_411760-t26_1 | gene=TGGT1_411760 | organism=Toxoplasma_gondii_GT1 | gene_product=Actin [Source:UniProtKB/TrEMBL;Acc:S7VNC9] | transcript_product=actin | location=AAQM03000536:57-991(+) | protein_length=287 | sequence_SO=contig | SO=protein_coding_gene | is_pseudo=false	0	70.933	35	11	95	8	287	32	6.04	251.8	11	1.818	0.86	1.55535e-07	9471.2	5209.6	7.82	9.11	8897.5	10081.8	8773.6	10396.3	8881.2	10185	8750.7	10158.5	4728.5	5564.7	4832.5	5772	4634.1	5573.8	4877.2	5638.8	1
TGGT1_268790	High	IsMasterProtein	TGGT1_268790-t26_1-p1	transcript=TGGT1_268790-t26_1 | gene=TGGT1_268790 | organism=Toxoplasma_gondii_GT1 | gene_product=hypothetical protein | transcript_product=hypothetical protein | location=TGGT1_chrVIII:6289367-6290125(+) | protein_length=252 | sequence_SO=chromosome | SO=protein_coding_gene | is_pseudo=false	0	17.067	27	5	9	5	252	27.3	5.03	35.99	5	1.82	0.86	0.0616725	1129.9	620.6	36.42	35.07	1096.8	1387.9	755.8	1343.3	906.2	294.4	1163.9	1390.1	284.2	770	331.4	657.1	586.2	709.1	386.8	744.2	1
TGGT1_310420	High	IsMasterProtein	TGGT1_310420-t26_1-p1	transcript=TGGT1_310420-t26_1 | gene=TGGT1_310420 | organism=Toxoplasma_gondii_GT1 | gene_product=hypothetical protein | transcript_product=hypothetical protein | location=TGGT1_chrXI:1293202-1295045(-) | protein_length=210 | sequence_SO=chromosome | SO=protein_coding_gene | is_pseudo=false	0.001	5.564	4	2	3	2	210	22.9	5.33	6.92	2	1.802	0.85	0.113117	256.5	142.3	49.59	46.92	285.9	492.3	179.4	396.4	169.2	81.1	292.8	230.1	65.5	153.3	61.3	131.5	164.6	189.2	132	275.7	1
TGGT1_306080	Low	IsMasterProtein	TGGT1_306080-t26_1-p1	transcript=TGGT1_306080-t26_1 | gene=TGGT1_306080 | organism=Toxoplasma_gondii_GT1 | gene_product=ATP-dependent DNA helicase, RecQ family protein [Source:UniProtKB/TrEMBL;Acc:S7UID0] | transcript_product=ATP-dependent DNA helicase, RecQ family protein | location=TGGT1_chrIX:5586396-5596597(+) | protein_length=1625 | sequence_SO=chromosome | SO=protein_coding_gene | is_pseudo=false	0.065	1.291	1	1	1	1	1625	175.1	6.65	2.14	1	1.777	0.83	0.0255411	168.5	94.8	51.05	29.76	218.9	126.9	307.8	122	205.8	138	414.5	125.2	105.3	91.1	130.1	87.7	168.6	83.2	71.8	98.8	1
TGGT1_208730	High	IsMasterProtein	TGGT1_208730-t26_1-p1	transcript=TGGT1_208730-t26_1 | gene=TGGT1_208730 | organism=Toxoplasma_gondii_GT1 | gene_product=Putative microneme protein [Source:UniProtKB/TrEMBL;Acc:S7UJI5] | transcript_product=putative microneme protein | location=TGGT1_chrIb:849268-853225(-) | protein_length=1016 | sequence_SO=chromosome | SO=protein_coding_gene | is_pseudo=false	0	11.015	6	4	4	4	1016	106.4	9.51	8.43	4	1.779	0.83	2.6962e-05	152.1	85.4	16.81	10.01	133.4	197.1	138.7	184.3	130.6	166.7	134.9	177.4	66.5	86.3	84.6	94.6	86.6	86.6	82.2	77	1
TGGT1_410260	Low	IsMasterProtein	TGGT1_410260-t26_1-p1	transcript=TGGT1_410260-t26_1 | gene=TGGT1_410260 | organism=Toxoplasma_gondii_GT1 | gene_product=Putative transmembrane protein [Source:UniProtKB/TrEMBL;Acc:S7UMB4] | transcript_product=putative transmembrane protein | location=TGGT1_chrXI:4824046-4828530(+) | protein_length=455 | sequence_SO=chromosome | SO=protein_coding_gene | is_pseudo=false	0.076	1.212	2	1	1	1	455	50.5	9.94	0	1	1.767	0.82	0.00155195	34.2	19.3	22.32	13.37	30.7	41.1	28	44.1	25.3	42.6	26.6	38	19.6	18.3	20.3	18.9	24	18.5	19.1	25.7	1
TGGT1_254730	High	IsMasterProtein	TGGT1_254730-t26_1-p1	transcript=TGGT1_254730-t26_1 | gene=TGGT1_254730 | organism=Toxoplasma_gondii_GT1 | gene_product=POPLD (NUC188) domain-containing protein [Source:UniProtKB/TrEMBL;Acc:S7VVP9] | transcript_product=POPLD (NUC188) domain-containing protein | location=TGGT1_chrIII:1886342-1893637(-) | protein_length=1757 | sequence_SO=chromosome | SO=protein_coding_gene | is_pseudo=false	0.005	3.367	1	2	2	2	1757	192.1	9.54	2.09	2	1.736	0.8	0.011475	188.5	108.6	31.3	8.68	154.2	261.9	138.7	230.5	118.8	232.7	128	244.2	97.8	121	102.9	115.9	102	114.6	97.1	115.8	1
TGGT1_278640	High	IsMasterProtein	TGGT1_278640-t26_1-p1	transcript=TGGT1_278640-t26_1 | gene=TGGT1_278640 | organism=Toxoplasma_gondii_GT1 | gene_product=SP-RING-type domain-containing protein [Source:UniProtKB/TrEMBL;Acc:S7WFQ6] | transcript_product=MIZ/SP-RING zinc finger domain-containing protein | location=TGGT1_chrXII:5880498-5892849(-) | protein_length=1772 | sequence_SO=chromosome | SO=protein_coding_gene | is_pseudo=false	0.001	6.674	2	3	3	3	1772	185.2	5.68	6.57	3	1.725	0.79	0.0200127	43.9	25.5	40.22	12.22	73.2	33.2	58	31.6	62.4	30.1	62.8	24.7	27.2	25.2	25.7	20	19.6	25.2	26.8	26.3	1
TGGT1_294960	High	IsMasterProtein	TGGT1_294960-t26_1-p1	transcript=TGGT1_294960-t26_1 | gene=TGGT1_294960 | organism=Toxoplasma_gondii_GT1 | gene_product=hypothetical protein | transcript_product=hypothetical protein | location=TGGT1_chrIa:1275002-1279921(+) | protein_length=519 | sequence_SO=chromosome | SO=protein_coding_gene | is_pseudo=false	0.009	2.806	2	1	1	1	519	55.9	6.18	2.22	1	1.711	0.78	0.000282801	20.8	12.1	12.68	18.47	16.9	20	23.1	21.5	23.5	19.9	19.8	25.5	17.4	12.1	13.5	15.4	12.2	11	11.9	10.1	1
TGGT1_316120	High	IsMasterProtein	TGGT1_316120-t26_1-p1	transcript=TGGT1_316120-t26_1 | gene=TGGT1_316120 | organism=Toxoplasma_gondii_GT1 | gene_product=OBG-type G domain-containing protein [Source:UniProtKB/TrEMBL;Acc:S7VUX4] | transcript_product=hypothetical protein | location=TGGT1_chrXI:5083687-5086641(+) | protein_length=984 | sequence_SO=chromosome | SO=protein_coding_gene | is_pseudo=false	0.006	3.135	1	1	2	1	984	105.8	8.07	4.44	1	1.677	0.75	6.45551e-05	376.1	224.2	13.21	5.55	311.2	406.9	347.6	428.1	314.6	416	342.7	420	232	222.2	234.8	242.2	222.5	204.7	225.9	210.1	1
TGGT1_356400	High	IsMasterProtein	TGGT1_356400-t26_1-p1	transcript=TGGT1_356400-t26_1 | gene=TGGT1_356400 | organism=Toxoplasma_gondii_GT1 | gene_product=cAMP-dependent protein kinase [Source:UniProtKB/TrEMBL;Acc:S7VUD2] | transcript_product=cAMP-dependent protein kinase | location=AAQM03000497:1-917(-) | protein_length=306 | sequence_SO=contig | SO=protein_coding_gene | is_pseudo=false	0	26.725	33	5	25	3	306	32	5.27	107.98	5	1.677	0.75	0.000119977	484.2	288.7	14.81	12.51	433.2	569.9	441.2	546	410.5	531.4	394.8	554.2	270.6	346.2	254.2	326.2	263	343.9	274.2	304	1
TGGT1_268300	Medium	IsMasterProtein	TGGT1_268300-t26_1-p1	transcript=TGGT1_268300-t26_1 | gene=TGGT1_268300 | organism=Toxoplasma_gondii_GT1 | gene_product=hypothetical protein | transcript_product=hypothetical protein | location=TGGT1_chrVIII:6556944-6558048(-) | protein_length=124 | sequence_SO=chromosome | SO=protein_coding_gene | is_pseudo=false	0.015	2.355	6	1	1	1	124	14.2	9.1	2.05	1	1.669	0.74	0.0178958	147.8	88.6	23.9	22.66	118	146	149.6	183.1	113.3	78.3	160.9	154.6	64.2	113.2	63.6	105.9	81	112.6	80.1	96.8	1
TGGT1_209755B	Medium	IsMasterProtein	TGGT1_209755B-t26_1-p1	transcript=TGGT1_209755B-t26_1 | gene=TGGT1_209755B | organism=Toxoplasma_gondii_GT1 | gene_product=hypothetical protein | transcript_product=hypothetical protein | location=TGGT1_chrIb:1445996-1447804(+) | protein_length=602 | sequence_SO=chromosome | SO=protein_coding_gene | is_pseudo=false	0.031	1.653	5	1	1	1	602	66.4	5.68	2.05	1	1.673	0.74	1.06583e-05	199.9	119.5	9.98	11.84	182.7	218.9	184.5	231.7	197.3	202.4	176.7	220.1	123.9	117.1	119.3	151.1	119.6	142.4	115.1	107.3	1
TGGT1_232970	Medium	IsMasterProtein	TGGT1_232970-t26_1-p1	transcript=TGGT1_232970-t26_1 | gene=TGGT1_232970 | organism=Toxoplasma_gondii_GT1 | gene_product=hypothetical protein | transcript_product=hypothetical protein | location=TGGT1_chrVIII:2296494-2301107(+) | protein_length=1537 | sequence_SO=chromosome | SO=protein_coding_gene | is_pseudo=false	0.038	1.58	1	1	1	1	1537	163.8	8.32	1.73	1	1.661	0.73	0.00360525	11.7	7	25.33	20.91	7.2	9.8	12.1	9.1	12.4	11.2	16.9	12.3	5.1	4.8	7.6	7.6	7.5	8.7	5.6	6.6	1
TGGT1_298010	Low	IsMasterProtein	TGGT1_298010-t26_1-p1	transcript=TGGT1_298010-t26_1 | gene=TGGT1_298010 | organism=Toxoplasma_gondii_GT1 | gene_product=eIF3_p135 domain-containing protein [Source:UniProtKB/TrEMBL;Acc:S7VZB4] | transcript_product=hypothetical protein | location=TGGT1_chrII:2137400-2168678(-) | protein_length=2322 | sequence_SO=chromosome | SO=protein_coding_gene | is_pseudo=false	0.071	1.242	1	1	1	1	2322	261.9	7.96	0	1	1.639	0.71	0.000980248	31	18.9	14.91	22.03	30.7	39	24.4	34.3	28.7	37.3	29.7	31.2	17.7	13.8	18.5	27.2	14.8	20	22.3	19.3	1
TGGT1_219770	Medium	IsMasterProtein	TGGT1_219770-t26_1-p1	transcript=TGGT1_219770-t26_1 | gene=TGGT1_219770 | organism=Toxoplasma_gondii_GT1 | gene_product=Putative 30S ribosomal protein S12 [Source:UniProtKB/TrEMBL;Acc:S7WAK3] | transcript_product=putative 30S ribosomal protein S12 | location=TGGT1_chrXII:590556-594213(+) | protein_length=594 | sequence_SO=chromosome | SO=protein_coding_gene | is_pseudo=false	0.016	2.285	1	1	1	1	594	66.3	11.24	2.65	1	1.623	0.7	0.0132197	103.8	63.9	32.76	12.57	126.6	71.1	146.2	80.4	159.7	75.8	141.6	85	70.5	57.3	64.9	57.6	75.4	63	72.3	52.7	1
TGGT1_320190	High	IsMasterProtein	TGGT1_320190-t26_1-p1	transcript=TGGT1_320190-t26_1 | gene=TGGT1_320190 | organism=Toxoplasma_gondii_GT1 | gene_product=SAG-related sequence SRS16B [Source:UniProtKB/TrEMBL;Acc:A0A125YJX4] | transcript_product=SAG-related sequence SRS16B | location=TGGT1_chrIV:385455-386651(-) | protein_length=398 | sequence_SO=chromosome | SO=protein_coding_gene | is_pseudo=false	0	15.624	14	6	11	6	398	41.5	6.55	20.23	6	1.592	0.67	2.5221e-07	468.9	294.5	4.61	6.95	481.6	477.1	432.1	431.5	487.4	468.9	456.7	468.8	317	279.3	291.7	309.5	297.3	283.5	342.5	289.1	1
TGGT1_261400	High	IsMasterProtein	TGGT1_261400-t26_1-p1	transcript=TGGT1_261400-t26_1 | gene=TGGT1_261400 | organism=Toxoplasma_gondii_GT1 | gene_product=hypothetical protein | transcript_product=hypothetical protein | location=TGGT1_chrVIIb:1743518-1746928(-) | protein_length=462 | sequence_SO=chromosome | SO=protein_coding_gene | is_pseudo=false	0	11.037	8	4	6	4	462	50.4	5.94	10.05	4	1.576	0.66	6.52398e-09	1141.4	724.2	4.55	3.13	1047	1212.5	1094.6	1133.8	1149.1	1149.1	1109.3	1182	708.6	753.5	711.7	728.9	755.1	755.3	719.4	699.4	1
TGGT1_301400	High	IsMasterProtein	TGGT1_301400-t26_1-p1	transcript=TGGT1_301400-t26_1 | gene=TGGT1_301400 | organism=Toxoplasma_gondii_GT1 | gene_product=hypothetical protein | transcript_product=hypothetical protein | location=TGGT1_chrIV:2331185-2338663(-) | protein_length=2264 | sequence_SO=chromosome | SO=protein_coding_gene | is_pseudo=false	0	16.057	3	6	7	6	2264	237.3	5.48	16.14	6	1.578	0.66	7.91844e-08	301.8	191.3	5.97	4.56	303.9	308.5	318.9	291.3	299.7	280	304.7	263.2	184.6	197.4	180.3	206.8	192.6	196.1	183.4	189.9	1
TGGT1_306530	High	IsMasterProtein	TGGT1_306530-t26_1-p1	transcript=TGGT1_306530-t26_1 | gene=TGGT1_306530 | organism=Toxoplasma_gondii_GT1 | gene_product=hypothetical protein | transcript_product=hypothetical protein | location=TGGT1_chrIX:5943726-5945126(-) | protein_length=466 | sequence_SO=chromosome | SO=protein_coding_gene | is_pseudo=false	0.003	3.847	4	1	1	1	466	50	6.62	2.98	1	1.553	0.64	0.016106	109.6	70.5	20.6	12.55	69.2	115.3	109.2	113.4	86.7	124.9	74.5	109.9	65.3	78	81.3	82.8	56.6	67.3	67.6	73.6	1
TGGT1_233470	Medium	IsMasterProtein	TGGT1_233470-t26_1-p1	transcript=TGGT1_233470-t26_1 | gene=TGGT1_233470 | organism=Toxoplasma_gondii_GT1 | gene_product=hypothetical protein | transcript_product=hypothetical protein | location=TGGT1_chrVIII:2663552-2665646(+) | protein_length=568 | sequence_SO=chromosome | SO=protein_coding_gene | is_pseudo=false	0.011	2.675	2	1	1	1	568	61.9	9.77	1.83	1	1.559	0.64	0.00144777	26.2	16.8	14.99	15.02	31.6	18.5	23	25.7	26.6	24.7	27.7	27.4	19.4	14.7	19.3	21.7	18.1	15.3	15.6	14.9	1
TGGT1_299200	Medium	IsMasterProtein	TGGT1_299200-t26_1-p1	transcript=TGGT1_299200-t26_1 | gene=TGGT1_299200 | organism=Toxoplasma_gondii_GT1 | gene_product=Trafficking protein particle complex subunit [Source:UniProtKB/TrEMBL;Acc:A0A125YTG7] | transcript_product=putative Bet3 transport protein | location=TGGT1_chrIII:2102262-2105060(-) | protein_length=187 | sequence_SO=chromosome | SO=protein_coding_gene | is_pseudo=false	0.024	1.801	4	1	1	1	187	21.2	4.6	0	1	1.545	0.63	0.00399586	19	12.3	16.22	16.67	21.7	13.2	20	19.6	22.3	17.9	18.5	15.7	16	11.2	9.7	11.6	12.8	15	14.5	11.8	1
TGGT1_239020	Medium	IsMasterProtein	TGGT1_239020-t26_1-p1	transcript=TGGT1_239020-t26_1 | gene=TGGT1_239020 | organism=Toxoplasma_gondii_GT1 | gene_product=ABC transporter transmembrane region domain-containing protein [Source:UniProtKB/TrEMBL;Acc:A0A125YHW5] | transcript_product=ABC transporter transmembrane region domain-containing protein | location=TGGT1_chrVI:391915-415649(-) | protein_length=1407 | sequence_SO=chromosome | SO=protein_coding_gene |…	0.039	1.539	1	1	1	1	1407	151.6	5.36	1.77	1	1.55	0.63	0.0230526	70.9	45.8	31.47	11.17	53.6	103	47.7	87.3	57.7	97.3	50.4	89.3	44.8	51.4	39.5	51.9	39.7	46.8	50.3	41.8	1
TGGT1_249760	Medium	IsMasterProtein	TGGT1_249760-t26_1-p1	transcript=TGGT1_249760-t26_1 | gene=TGGT1_249760 | organism=Toxoplasma_gondii_GT1 | gene_product=VKc domain-containing protein [Source:UniProtKB/TrEMBL;Acc:S7V090] | transcript_product=vitamin k epoxide reductase family protein | location=TGGT1_chrXII:4720779-4724312(-) | protein_length=169 | sequence_SO=chromosome | SO=protein_coding_gene | is_pseudo=false	0.021	1.946	5	1	1	1	169	18.1	8.84	1.69	1	1.551	0.63	0.00576983	108.8	70.1	21.75	7.43	92.5	68	90.8	125.3	128.8	105.3	138.7	112.4	73.6	68.6	74.9	65.3	74.5	61.3	71.6	64.6	1
TGGT1_269420	High	IsMasterProtein	TGGT1_269420-t26_1-p1	transcript=TGGT1_269420-t26_1 | gene=TGGT1_269420 | organism=Toxoplasma_gondii_GT1 | gene_product=TTF-type domain-containing protein [Source:UniProtKB/TrEMBL;Acc:S7V5K2] | transcript_product=hypothetical protein | location=TGGT1_chrVIII:5812022-5814244(-) | protein_length=740 | sequence_SO=chromosome | SO=protein_coding_gene | is_pseudo=false	0	10.552	7	3	3	3	740	79	6.96	8.95	3	1.533	0.62	0.000285793	72.2	47.1	10.4	13.89	57.7	78.9	76.8	74.4	64	73.1	64.5	71.3	52.9	54.4	35	44.7	40.5	45.5	48.7	49.8	1
TGGT1_209985	High	IsMasterProtein	TGGT1_209985-t26_1-p1	transcript=TGGT1_209985-t26_1 | gene=TGGT1_209985 | organism=Toxoplasma_gondii_GT1 | gene_product=Protein kinase domain-containing protein [Source:UniProtKB/TrEMBL;Acc:S7VXT1] | transcript_product=cAMP-dependent protein kinase | location=TGGT1_chrIb:1628949-1629743(-) | protein_length=264 | sequence_SO=chromosome | SO=protein_coding_gene | is_pseudo=false	0	30.721	30	7	26	6	264	29.6	9.35	80.15	7	1.54	0.62	0.000230859	2697.1	1750.9	14.66	8.05	2368.2	3104	2309.8	3030.1	2323.5	3090.4	2400.7	3147.4	1580.3	1846.7	1621.1	1901.7	1613.3	1904.8	1660	1849.6	1
TGGT1_226310	Low	IsMasterProtein	TGGT1_226310-t26_1-p1	transcript=TGGT1_226310-t26_1 | gene=TGGT1_226310 | organism=Toxoplasma_gondii_GT1 | gene_product=Zinc finger (CCCH type) motif-containing protein [Source:UniProtKB/TrEMBL;Acc:S7UX32] | transcript_product=zinc finger (CCCH type) motif-containing protein | location=TGGT1_chrX:1634185-1638075(-) | protein_length=1114 | sequence_SO=chromosome | SO=protein_coding_gene | is_pseudo=false	0.065	1.291	1	1	1	1	1114	121.4	8.59	1.78	1	1.521	0.61	0.000456091	49.4	32.5	7.75	15.03	46.9	48.8	48.8	49.3	49.5	56.9	49.8	57.5	24.1	36.8	31.8	39.9	30.6	31.9	33.1	38.2	1
TGGT1_213067	High	IsMasterProtein	TGGT1_213067-t26_1-p1	transcript=TGGT1_213067-t26_1 | gene=TGGT1_213067 | organism=Toxoplasma_gondii_GT1 | gene_product=hypothetical protein | transcript_product=hypothetical protein | location=TGGT1_chrV:709637-710995(-) | protein_length=452 | sequence_SO=chromosome | SO=protein_coding_gene | is_pseudo=false	0	12.369	11	5	6	5	452	50.1	9.47	9.2	5	1.524	0.61	7.53551e-05	344	225.7	11.7	7.12	303	369.5	299.1	401.2	323.6	365.6	317.4	392.5	211.8	248.8	221.9	243.3	220.4	225.9	225.5	259.9	1
TGGT1_295750	High	IsMasterProtein	TGGT1_295750-t26_1-p1	transcript=TGGT1_295750-t26_1 | gene=TGGT1_295750 | organism=Toxoplasma_gondii_GT1 | gene_product=IgA-specific serine endopeptidase [Source:UniProtKB/TrEMBL;Acc:A0A125YNZ2] | transcript_product=IgA-specific serine endopeptidase | location=TGGT1_chrIa:1524720-1526675(-) | protein_length=317 | sequence_SO=chromosome | SO=protein_coding_gene | is_pseudo=false	0.003	4.427	3	1	4	1	317	37.6	3.54	8.56	1	1.511	0.6	1.79088e-06	439.3	290.7	7.42	6.09	434.9	463	389.1	466.3	386.4	444.9	403.7	443.7	295.1	316	281.7	317.4	264.3	297.1	286.3	283.7	1
TGGT1_253870	Low	IsMasterProtein	TGGT1_253870-t26_1-p1	transcript=TGGT1_253870-t26_1 | gene=TGGT1_253870 | organism=Toxoplasma_gondii_GT1 | gene_product=hypothetical protein | transcript_product=hypothetical protein | location=TGGT1_chrIII:1226722-1243156(-) | protein_length=4852 | sequence_SO=chromosome | SO=protein_coding_gene | is_pseudo=false	0.075	1.217	0	1	1	1	4852	525.1	7.56	1.9	1	1.517	0.6	0.00197067	169	111.4	17.06	13.99	187.2	150.3	185.2	129.3	195.3	137.7	205.8	154.2	93.7	104.3	123.4	112.9	147.8	110.8	112	108.5	1
TGGT1_225230	High	IsMasterProtein	TGGT1_225230-t26_1-p1	transcript=TGGT1_225230-t26_1 | gene=TGGT1_225230 | organism=Toxoplasma_gondii_GT1 | gene_product=hypothetical protein | transcript_product=hypothetical protein | location=TGGT1_chrX:2296184-2298591(-) | protein_length=744 | sequence_SO=chromosome | SO=protein_coding_gene | is_pseudo=false	0	24.063	14	8	10	8	744	76.7	9.28	20.36	8	1.505	0.59	2.76473e-07	685.6	455.6	4.51	6.58	647	720.2	638.6	686.2	685	708.9	672.9	718.2	417	512	428.8	460.5	452.8	480	438.9	458.4	1
TGGT1_273110	High	IsMasterProtein	TGGT1_273110-t26_1-p1	transcript=TGGT1_273110-t26_1 | gene=TGGT1_273110 | organism=Toxoplasma_gondii_GT1 | gene_product=SAG-related sequence SRS30D [Source:UniProtKB/TrEMBL;Acc:S7V3C4] | transcript_product=SAG-related sequence SRS30D | location=TGGT1_chrVIII:3646267-3647523(-) | protein_length=418 | sequence_SO=chromosome | SO=protein_coding_gene | is_pseudo=false	0	10.824	6	3	3	3	418	45	7.01	9.35	3	1.506	0.59	0.00120403	58.8	39.1	6.32	16.65	59.8	58.2	62.7	59.5	51	55	56.7	60.5	30	38	29.8	43.3	36.2	40.2	46.7	45.2	1
TGGT1_309110	Medium	IsMasterProtein	TGGT1_309110-t26_1-p1	transcript=TGGT1_309110-t26_1 | gene=TGGT1_309110 | organism=Toxoplasma_gondii_GT1 | gene_product=SufE domain-containing protein [Source:UniProtKB/TrEMBL;Acc:S7USR0] | transcript_product=tRNA methyl transferase | location=TGGT1_chrXI:468659-474327(+) | protein_length=1579 | sequence_SO=chromosome | SO=protein_coding_gene | is_pseudo=false	0.014	2.432	1	1	4	1	1579	171.4	7.27	0	1	1.494	0.58	4.91232e-06	177.7	118.9	8.6	5	158.3	194	172	183.5	166.6	199.2	165.4	192.6	112.4	118.6	117.3	123.5	127.9	120.6	119.2	109	1	Methylthio [C886]
TGGT1_270240	High	IsMasterProtein	TGGT1_270240-t26_1-p1	transcript=TGGT1_270240-t26_1 | gene=TGGT1_270240 | organism=Toxoplasma_gondii_GT1 | gene_product=MAG1 protein [Source:UniProtKB/TrEMBL;Acc:S7V482] | transcript_product=MAG1 protein | location=TGGT1_chrVIII:5310162-5311630(+) | protein_length=452 | sequence_SO=chromosome | SO=protein_coding_gene | is_pseudo=false	0	56.487	21	13	42	12	452	49.2	4.96	114.39	13	1.497	0.58	0.00187582	5384.5	3597.6	18.46	6.04	4496.4	6581.5	4587.9	6494.8	4548.1	6283.1	4614.4	6471	3376.7	3744.9	3468.1	3838.1	3228.9	3784.7	3516.2	3680.8	1
TGGT1_207140	High	IsMasterProtein	TGGT1_207140-t26_1-p1	transcript=TGGT1_207140-t26_1 | gene=TGGT1_207140 | organism=Toxoplasma_gondii_GT1 | gene_product=SAG-related sequence SRS49B [Source:UniProtKB/TrEMBL;Acc:S7UQK0] | transcript_product=SAG-related sequence SRS49B | location=TGGT1_chrX:7286812-7288051(-) | protein_length=367 | sequence_SO=chromosome | SO=protein_coding_gene | is_pseudo=false	0	12.18	12	4	9	4	367	38.6	6.99	27.55	4	1.498	0.58	2.04152e-08	1108.6	740	4.12	4.93	1061.3	1160.3	1086.5	1157.8	1062.3	1131.2	1051.4	1138.1	724.3	778.2	691.7	769.2	690.7	756.2	714.5	772.8	1
TGGT1_323200	Medium	IsMasterProtein	TGGT1_323200-t26_1-p1	transcript=TGGT1_323200-t26_1 | gene=TGGT1_323200 | organism=Toxoplasma_gondii_GT1 | gene_product=OTU domain-containing protein [Source:UniProtKB/TrEMBL;Acc:S7VTI5] | transcript_product=OTU family cysteine protease | location=AAQM03000278:359-2044(-) | protein_length=561 | sequence_SO=contig | SO=protein_coding_gene | is_pseudo=false	0.025	1.788	2	1	1	1	561	62.6	4.86	2.04	1	1.488	0.57	0.0245509	50.9	34.2	30.16	11.64	37.6	67.8	38.1	68	39.4	70.9	37.9	65.8	34.8	27.9	38.3	40.1	33.7	32.1	35.7	30.7	1
TGGT1_411410	High	IsMasterProtein	TGGT1_411410-t26_1-p1	transcript=TGGT1_411410-t26_1 | gene=TGGT1_411410 | organism=Toxoplasma_gondii_GT1 | gene_product=Putative transmembrane protein [Source:UniProtKB/TrEMBL;Acc:S7UGE4] | transcript_product=putative transmembrane protein | location=AAQM03000486:998-1834(+) | protein_length=278 | sequence_SO=contig | SO=protein_coding_gene | is_pseudo=false	0	13.188	22	3	12	1	278	29.5	10.77	22.89	3	1.47	0.56	0.0326231	14.6	10	24.37	20.32	16.3	15.6	14.7	13.9	8.5	17.8	8.8	14.6	9.7	7.1	10.6	10.2	7.3	7.4	11.1	12	1
TGGT1_272760	High	IsMasterProtein	TGGT1_272760-t26_1-p1	transcript=TGGT1_272760-t26_1 | gene=TGGT1_272760 | organism=Toxoplasma_gondii_GT1 | gene_product=hypothetical protein | transcript_product=hypothetical protein | location=TGGT1_chrVIII:3745059-3747998(-) | protein_length=545 | sequence_SO=chromosome | SO=protein_coding_gene | is_pseudo=false	0	12.694	8	5	7	4	545	57.3	6.73	16.92	5	1.462	0.55	5.89276e-06	164.6	112.6	7.2	7.93	161.3	174.8	172.2	166.1	164.1	136.2	165.1	162.8	112.3	121	107	94.2	112.9	106.9	121.2	116	1
TGGT1_309910	High	IsMasterProtein	TGGT1_309910-t26_1-p1	transcript=TGGT1_309910-t26_1 | gene=TGGT1_309910 | organism=Toxoplasma_gondii_GT1 | gene_product=Aa_trans domain-containing protein [Source:UniProtKB/TrEMBL;Acc:S7USW0] | transcript_product=hypothetical protein | location=TGGT1_chrXI:854394-862174(-) | protein_length=2131 | sequence_SO=chromosome | SO=protein_coding_gene | is_pseudo=false	0	11.16	2	4	4	4	2131	226.5	6.07	12.21	4	1.464	0.55	8.16426e-06	298.5	203.8	3.07	7.58	311.1	307.8	289.7	284.7	305.7	298.4	298.5	293.6	190.6	207.2	213.7	220.6	184.1	200.5	190	226.7	1
TGGT1_253570	High	IsMasterProtein	TGGT1_253570-t26_1-p1	transcript=TGGT1_253570-t26_1 | gene=TGGT1_253570 | organism=Toxoplasma_gondii_GT1 | gene_product=hypothetical protein | transcript_product=hypothetical protein | location=TGGT1_chrIII:1017173-1020294(+) | protein_length=318 | sequence_SO=chromosome | SO=protein_coding_gene | is_pseudo=false	0.003	4.424	5	2	2	2	318	35.7	8.98	4.77	2	1.449	0.54	0.0302577	66.9	46.2	41.64	7.52	53.9	43.7	64	70	75.6	116.5	63.6	139.1	40.7	46	50.4	46.4	40.6	47.7	44.1	47.1	1
TGGT1_277260	Medium	IsMasterProtein	TGGT1_277260-t26_1-p1	transcript=TGGT1_277260-t26_1 | gene=TGGT1_277260 | organism=Toxoplasma_gondii_GT1 | gene_product=hypothetical protein | transcript_product=hypothetical protein | location=TGGT1_chrXII:6595491-6602496(-) | protein_length=1684 | sequence_SO=chromosome | SO=protein_coding_gene | is_pseudo=false	0.025	1.786	0	1	1	1	1684	185.1	6.4	0	1	1.45	0.54	0.00163904	46.6	32.1	15.19	12.77	38.8	57.7	46.5	51.6	35.7	48.2	46.7	42.7	34.3	31.8	27.5	27.5	29.5	39.5	32.4	35.1	1
TGGT1_319550	High	IsMasterProtein	TGGT1_319550-t26_1-p1	transcript=TGGT1_319550-t26_1 | gene=TGGT1_319550 | organism=Toxoplasma_gondii_GT1 | gene_product=GDT1 family protein [Source:UniProtKB/TrEMBL;Acc:S7VYN4] | transcript_product=putative membrane protein C17G8.08c | location=TGGT1_chrIV:860678-864817(+) | protein_length=343 | sequence_SO=chromosome | SO=protein_coding_gene | is_pseudo=false	0	14.218	13	3	6	3	343	36.2	5.81	19.06	3	1.441	0.53	1.37484e-06	267.3	185.5	3.68	6.5	265.8	277.6	259	268.7	265	248.1	270.5	277.9	180.5	205.2	194	168.3	192.9	172.5	188.3	182.7	1
TGGT1_217500	High	IsMasterProtein	TGGT1_217500-t26_1-p1	transcript=TGGT1_217500-t26_1 | gene=TGGT1_217500 | organism=Toxoplasma_gondii_GT1 | gene_product=HMG box domain-containing protein [Source:UniProtKB/TrEMBL;Acc:S7V1H9] | transcript_product=HMG (high mobility group) box domain-containing protein | location=TGGT1_chrXII:1817499-1823489(-) | protein_length=347 | sequence_SO=chromosome | SO=protein_coding_gene | is_pseudo=false	0.009	2.778	3	1	1	1	347	38.5	9.26	2.06	1	1.442	0.53	0.00063885	107.1	74.3	11.95	11.61	106.4	109.4	114.8	101.8	107.9	115.6	78.1	94.2	73.6	76.6	67.8	76.2	55.3	70.2	75	84	1
TGGT1_265190	High	IsMasterProtein	TGGT1_265190-t26_1-p1	transcript=TGGT1_265190-t26_1 | gene=TGGT1_265190 | organism=Toxoplasma_gondii_GT1 | gene_product=ULP_PROTEASE domain-containing protein [Source:UniProtKB/TrEMBL;Acc:S7UGW1] | transcript_product=Ulp1 protease family, C-terminal catalytic domain-containing protein | location=TGGT1_chrIX:1529797-1543022(+) | protein_length=3028 | sequence_SO=chromosome | SO=protein_coding_gene | is_pseudo=false	0.001	6.773	1	3	6	3	3028	329.7	5.14	9.46	3	1.442	0.53	0.197297	362.4	251.3	47.78	4.73	214.3	603	243.8	580.5	213.5	538.6	216.4	586.8	264.3	246.7	271.6	247.5	249	236.3	266.9	253.7	1
TGGT1_288440	Low	IsMasterProtein	TGGT1_288440-t26_1-p1	transcript=TGGT1_288440-t26_1 | gene=TGGT1_288440 | organism=Toxoplasma_gondii_GT1 | gene_product=NEK kinase [Source:UniProtKB/TrEMBL;Acc:S7W4M5] | transcript_product=NEK kinase | location=TGGT1_chrIX:2334505-2356246(-) | protein_length=4902 | sequence_SO=chromosome | SO=protein_coding_gene | is_pseudo=false	0.069	1.261	0	1	1	1	4902	531.8	7.75	0	1	1.43	0.52	0.000237649	51.5	36	10.51	12.99	59.4	44.9	52.5	49.5	48.1	52.1	61.1	51	32.8	35	38.2	31	40.8	40	27.7	37.1	1
TGGT1_258560	High	IsMasterProtein	TGGT1_258560-t26_1-p1	transcript=TGGT1_258560-t26_1 | gene=TGGT1_258560 | organism=Toxoplasma_gondii_GT1 | gene_product=hypothetical protein | transcript_product=hypothetical protein | location=TGGT1_chrVIIb:3299918-3304012(-) | protein_length=850 | sequence_SO=chromosome | SO=protein_coding_gene | is_pseudo=false	0.001	5.181	2	2	6	2	850	96.8	8.63	7.68	2	1.432	0.52	0.000909971	358.2	250.1	14.62	6.61	301.6	395.3	287.4	418.5	323.4	393.3	326.3	406.7	228.2	266.1	231.1	250	250.3	261.1	221.4	251.9	1
TGGT1_272440	High	IsMasterProtein	TGGT1_272440-t26_1-p1	transcript=TGGT1_272440-t26_1 | gene=TGGT1_272440 | organism=Toxoplasma_gondii_GT1 | gene_product=RRM domain-containing protein [Source:UniProtKB/TrEMBL;Acc:S7V383] | transcript_product=RNA recognition motif-containing protein | location=TGGT1_chrVIII:3962549-3964656(+) | protein_length=207 | sequence_SO=chromosome | SO=protein_coding_gene | is_pseudo=false	0.005	3.281	5	1	1	1	207	23.9	11.53	2.47	1	1.436	0.52	4.91232e-06	78.1	54.4	8.4	8.43	85.7	83.1	70.4	91.4	79.1	75.7	75.1	77.2	55.7	45.2	45.8	54.8	53.4	56.5	54.5	54.4	1
TGGT1_316150	High	IsMasterProtein	TGGT1_316150-t26_1-p1	transcript=TGGT1_316150-t26_1 | gene=TGGT1_316150 | organism=Toxoplasma_gondii_GT1 | gene_product=Protein kinase domain-containing protein [Source:UniProtKB/TrEMBL;Acc:S7UME0] | transcript_product=ULK kinase | location=TGGT1_chrXI:5102196-5110683(+) | protein_length=2096 | sequence_SO=chromosome | SO=protein_coding_gene | is_pseudo=false	0.009	2.838	1	2	2	1	2096	224.4	7.27	3.96	2	1.421	0.51	0.00220615	63	44.3	17.2	13.32	64.2	53.8	76.3	61.8	69.6	57.4	83.6	51.5	53	42.3	38.8	46.5	49.3	36.4	50.2	40.8	1
TGGT1_319650	Medium	IsMasterProtein	TGGT1_319650-t26_1-p1	transcript=TGGT1_319650-t26_1 | gene=TGGT1_319650 | organism=Toxoplasma_gondii_GT1 | gene_product=RNase_PH domain-containing protein [Source:UniProtKB/TrEMBL;Acc:S7VYP8] | transcript_product=3' exoribonuclease family, domain 1 domain-containing protein | location=TGGT1_chrIV:750761-756340(-) | protein_length=303 | sequence_SO=chromosome | SO=protein_coding_gene | is_pseudo=false	0.025	1.784	5	1	1	1	303	32.5	6.42	0	1	1.425	0.51	0.0923563	19.7	13.8	18.6	28.21	19.1	22.8	20.5	23	13.4	20.2	14.5	17.9	16.7	12.5	12.5	15.2	8.1	11.8	21.4	17.3	1
TGGT1_295760	Medium	IsMasterProtein	TGGT1_295760-t26_1-p1	transcript=TGGT1_295760-t26_1 | gene=TGGT1_295760 | organism=Toxoplasma_gondii_GT1 | gene_product=Calcium-dependent protein kinase CDPK4A [Source:UniProtKB/TrEMBL;Acc:S7UJ03] | transcript_product=calcium-dependent protein kinase CDPK4A | location=TGGT1_chrIa:1506344-1521114(-) | protein_length=543 | sequence_SO=chromosome | SO=protein_coding_gene | is_pseudo=false	0.023	1.868	2	1	2	1	543	60.9	6.6	0	1	1.413	0.5	0.205508	9.2	6.5	23.64	22.92	9.2	10	9.9	4.7	9.2	7	10.3	7	6.9	4.4	6.1	5.5	8.9	7.1	8.7	6.2	1
TGGT1_261650	High	IsMasterProtein	TGGT1_261650-t26_1-p1	transcript=TGGT1_261650-t26_1 | gene=TGGT1_261650 | organism=Toxoplasma_gondii_GT1 | gene_product=hypothetical protein | transcript_product=hypothetical protein | location=TGGT1_chrVIIb:1586531-1593870(-) | protein_length=1135 | sequence_SO=chromosome | SO=protein_coding_gene | is_pseudo=false	0	19.823	8	6	8	6	1135	124.8	6.09	18.84	6	1.414	0.5	1.59869e-05	209.9	148.4	7.6	8.45	195.3	222.4	227.8	207.5	212.4	191.3	189.4	227.3	141	146	152.5	154.2	117.7	155.5	150.9	142.4	1
TGGT1_315410	High	IsMasterProtein	TGGT1_315410-t26_1-p1	transcript=TGGT1_315410-t26_1 | gene=TGGT1_315410 | organism=Toxoplasma_gondii_GT1 | gene_product=SAG-related sequence SRS53F [Source:UniProtKB/TrEMBL;Acc:S7ULJ3] | transcript_product=SAG-related sequence SRS53F | location=TGGT1_chrXI:4637597-4638985(-) | protein_length=322 | sequence_SO=chromosome | SO=protein_coding_gene | is_pseudo=false	0	15.343	12	4	5	4	322	34.1	6.62	14.29	4	1.419	0.5	4.67131e-07	429.6	302.8	4.65	5.64	429	454.6	403.7	423.8	438.5	393	430.2	438.5	295.2	335.1	300.2	305.3	317	328.7	289.2	291.1	1
TGGT1_204490	Medium	IsMasterProtein	TGGT1_204490-t26_1-p1	transcript=TGGT1_204490-t26_1 | gene=TGGT1_204490 | organism=Toxoplasma_gondii_GT1 | gene_product=hypothetical protein | transcript_product=hypothetical protein | location=TGGT1_chrVIIa:1651032-1653481(-) | protein_length=272 | sequence_SO=chromosome | SO=protein_coding_gene | is_pseudo=false	0.015	2.336	4	1	1	1	272	31.4	10.1	0	1	1.403	0.49	0.0892399	16.2	11.6	18.47	20.9	14.2	20.1	11.7	17.1	13.6	15.4	19.7	17.7	11.6	16.1	11.6	14.9	11.6	17.1	11	9.6	1
TGGT1_310470	High	IsMasterProtein	TGGT1_310470-t26_1-p1	transcript=TGGT1_310470-t26_1 | gene=TGGT1_310470 | organism=Toxoplasma_gondii_GT1 | gene_product=COX2_CUA domain-containing protein [Source:UniProtKB/TrEMBL;Acc:A0A125YMT4] | transcript_product=putative cytochrome C oxidase subunit IIb | location=TGGT1_chrXI:1338649-1339224(+) | protein_length=191 | sequence_SO=chromosome | SO=protein_coding_gene | is_pseudo=false	0	9.199	26	3	3	3	191	21.2	8.27	4.84	3	1.408	0.49	0.00330543	42.8	30.4	14.28	13.05	43.6	34.5	44.4	36	53.4	42	46	38.7	32.5	27.8	29.8	35.6	29.4	25.6	38	31	1
TGGT1_312830	High	IsMasterProtein	TGGT1_312830-t26_1-p1	transcript=TGGT1_312830-t26_1 | gene=TGGT1_312830 | organism=Toxoplasma_gondii_GT1 | gene_product=hypothetical protein | transcript_product=hypothetical protein | location=TGGT1_chrXI:2897239-2900208(+) | protein_length=989 | sequence_SO=chromosome | SO=protein_coding_gene | is_pseudo=false	0.005	3.275	2	1	1	1	989	106.3	7.14	2.34	1	1.394	0.48	0.330428	9	6.4	30.2	27.45	4.7	12.2	9	9	11	9.9	5.8	6.7	8.2	5.9	5.4	7	5	7.3	10.8	5.7	1
TGGT1_254530	High	IsMasterProtein	TGGT1_254530-t26_1-p1	transcript=TGGT1_254530-t26_1 | gene=TGGT1_254530 | organism=Toxoplasma_gondii_GT1 | gene_product=hypothetical protein | transcript_product=hypothetical protein | location=TGGT1_chrIII:1788411-1796781(+) | protein_length=1867 | sequence_SO=chromosome | SO=protein_coding_gene | is_pseudo=false	0.006	3.052	1	1	1	1	1867	197.7	7.97	2.09	1	1.383	0.47	0.0717498	9.6	7	33.66	23.81	7.7	8.8	10.6	7.4	11.8	6.7	17.3	10.5	6.2	6.8	4.2	9.8	6.1	8	7.2	8.2	1
TGGT1_230380	High	IsMasterProtein	TGGT1_230380-t26_1-p1	transcript=TGGT1_230380-t26_1 | gene=TGGT1_230380 | organism=Toxoplasma_gondii_GT1 | gene_product=Protein translocation complex, SEC61 gamma subunit [Source:UniProtKB/TrEMBL;Acc:S7WB99] | transcript_product=protein translocation complex, SEC61 gamma subunit | location=TGGT1_chrVIII:734700-735864(-) | protein_length=149 | sequence_SO=chromosome | SO=protein_coding_gene | is_pseudo=false	0.009	2.855	5	1	5	1	149	16.8	10.58	9.36	1	1.387	0.47	0.0100463	892.8	643.7	23.13	6.81	1157.6	793	1113.9	753.9	1005.1	691	1244	747.5	668	609	684	663.5	649.6	559.6	637.8	588.6	1
TGGT1_210310	Medium	IsMasterProtein	TGGT1_210310-t26_1-p1	transcript=TGGT1_210310-t26_1 | gene=TGGT1_210310 | organism=Toxoplasma_gondii_GT1 | gene_product=DOT1 domain-containing protein [Source:UniProtKB/TrEMBL;Acc:S7UNS4] | transcript_product=hypothetical protein | location=TGGT1_chrIX:4667186-4674672(-) | protein_length=2377 | sequence_SO=chromosome | SO=protein_coding_gene | is_pseudo=false	0.022	1.914	0	1	1	1	2377	258.5	6.49	2.35	1	1.373	0.46	0.0236852	227	165.3	22.86	9.31	264.7	197.9	260.5	160	298.2	189	273.9	178.1	174.5	171.3	186.9	154.1	159.5	145.3	173.3	144.4	1
TGGT1_252210	High	IsMasterProtein	TGGT1_252210-t26_1-p1	transcript=TGGT1_252210-t26_1 | gene=TGGT1_252210 | organism=Toxoplasma_gondii_GT1 | gene_product=PPR_long domain-containing protein [Source:UniProtKB/TrEMBL;Acc:S7W2F8] | transcript_product=pentatricopeptide repeat domain-containing protein | location=TGGT1_chrIII:378447-385902(-) | protein_length=1904 | sequence_SO=chromosome | SO=protein_coding_gene | is_pseudo=false	0	21.26	4	7	7	7	1904	201.2	6.87	20.44	7	1.38	0.46	0.000239695	784.8	568.7	9.9	3.88	848.5	754	878.1	727.3	816.9	665.1	865.6	726.7	545.7	594.6	579	602.4	552.4	587.2	558.6	550.2	1
TGGT1_272370	High	IsMasterProtein	TGGT1_272370-t26_1-p1	transcript=TGGT1_272370-t26_1 | gene=TGGT1_272370 | organism=Toxoplasma_gondii_GT1 | gene_product=hypothetical protein | transcript_product=hypothetical protein | location=TGGT1_chrVIII:4025598-4035718(-) | protein_length=2165 | sequence_SO=chromosome | SO=protein_coding_gene | is_pseudo=false	0	16.291	3	5	5	5	2165	235	5.9	16.15	5	1.38	0.46	0.0126246	295.9	214.5	18.34	5.19	234.5	359.6	267.7	345.4	244.2	327.1	230.2	330.5	217.2	211.7	209	232	200.3	231.5	222.3	209.8	1
TGGT1_311680	High	IsMasterProtein	TGGT1_311680-t26_1-p1	transcript=TGGT1_311680-t26_1 | gene=TGGT1_311680 | organism=Toxoplasma_gondii_GT1 | gene_product=FUN14 family protein [Source:UniProtKB/TrEMBL;Acc:A0A125YM23] | transcript_product=FUN14 family protein | location=TGGT1_chrXI:2165999-2167057(-) | protein_length=184 | sequence_SO=chromosome | SO=protein_coding_gene | is_pseudo=false	0.001	7.243	15	2	2	2	184	20	7.21	6.47	2	1.38	0.46	0.00163904	164.1	119	14.4	7.55	186.2	139.7	194	141.6	175.2	153.8	186.6	137.5	120.9	112.4	124.4	105.8	122.9	110.6	133.9	117.1	1
TGGT1_258820	Medium	IsMasterProtein	TGGT1_258820-t26_1-p1	transcript=TGGT1_258820-t26_1 | gene=TGGT1_258820 | organism=Toxoplasma_gondii_GT1 | gene_product=hypothetical protein | transcript_product=hypothetical protein | location=TGGT1_chrVIIb:3133824-3135820(-) | protein_length=129 | sequence_SO=chromosome | SO=protein_coding_gene | is_pseudo=false	0.021	1.951	5	1	1	1	129	14.9	7.91	2.33	1	1.364	0.45	0.00017817	130.2	95.5	10.13	9.71	135.7	121.1	148.8	125	147.9	115.7	144.6	120.9	88.7	94.4	106.6	79.1	102.1	88.8	103.8	96.5	1
TGGT1_219430	High	IsMasterProtein	TGGT1_219430-t26_1-p1	transcript=TGGT1_219430-t26_1 | gene=TGGT1_219430 | organism=Toxoplasma_gondii_GT1 | gene_product=AA_TRNA_LIGASE_II domain-containing protein [Source:UniProtKB/TrEMBL;Acc:S7WHW0] | transcript_product=tRNA ligase class II core domain (G, H, P, S and T) domain-containing protein | location=TGGT1_chrXII:890626-897747(+) | protein_length=1203 | sequence_SO=chromosome | SO=protein_coding_gene | is_pse…	0.001	6.176	2	3	3	3	1203	131.5	9.47	5.03	3	1.353	0.44	0.0572381	115.8	85.6	27.65	8.48	98.2	149.1	94.1	136.5	79.7	158.9	80.7	141.8	87.5	73.7	77.9	77.7	83.7	91.2	93.1	89.3	1
TGGT1_297220	High	IsMasterProtein	TGGT1_297220-t26_1-p1	transcript=TGGT1_297220-t26_1 | gene=TGGT1_297220 | organism=Toxoplasma_gondii_GT1 | gene_product=AMP-binding enzyme domain-containing protein [Source:UniProtKB/TrEMBL;Acc:S7UJY8] | transcript_product=AMP-binding enzyme domain-containing protein | location=TGGT1_chrII:1598391-1603650(-) | protein_length=921 | sequence_SO=chromosome | SO=protein_coding_gene | is_pseudo=false	0	10.752	6	3	4	3	921	100.7	6.39	8.63	3	1.353	0.44	1.88976e-05	185.8	137.3	7.11	4.46	197.8	178.3	196.5	174.3	185	186.6	196	159.9	145.6	136.8	135.9	142.7	131.8	127.2	137.9	142.9	1
TGGT1_306338B	Low	IsMasterProtein	TGGT1_306338B-t26_1-p1	transcript=TGGT1_306338B-t26_1 | gene=TGGT1_306338B | organism=Toxoplasma_gondii_GT1 | gene_product=Putative dynein gamma chain, flagellar outer arm [Source:UniProtKB/TrEMBL;Acc:S7UIB2] | transcript_product=putative dynein gamma chain, flagellar outer arm | location=TGGT1_chrIX:5753458-5781211(-) | protein_length=2699 | sequence_SO=chromosome | SO=protein_coding_gene | is_pseudo=false	0.057	1.344	0	1	1	1	2699	306.7	6.74	0	1	1.355	0.44	0.0203353	42.2	31.1	28.31	16.2	39.2	31	33.3	54.4	62.9	40.9	65.6	43.4	33	28.4	32.9	22.9	37.6	29.4	35	25.4	1
TGGT1_309170	Medium	IsMasterProtein	TGGT1_309170-t26_1-p1	transcript=TGGT1_309170-t26_1 | gene=TGGT1_309170 | organism=Toxoplasma_gondii_GT1 | gene_product=TAFII55_N domain-containing protein [Source:UniProtKB/TrEMBL;Acc:S7W133] | transcript_product=TAF7-like RNA polymerase II TAF7L | location=TGGT1_chrXI:496176-501689(-) | protein_length=728 | sequence_SO=chromosome | SO=protein_coding_gene | is_pseudo=false	0.028	1.717	1	1	3	1	728	76.5	5.6	5.78	1	1.358	0.44	0.0310039	296.5	218.2	26.2	11.73	355.8	225.9	376.3	231.9	408.8	247	388	231.5	225.5	212.6	252.3	196.2	243.6	191.6	224	180.6	1
TGGT1_272500	High	IsMasterProtein	TGGT1_272500-t26_1-p1	transcript=TGGT1_272500-t26_1 | gene=TGGT1_272500 | organism=Toxoplasma_gondii_GT1 | gene_product=MFS domain-containing protein [Source:UniProtKB/TrEMBL;Acc:A0A125YQ99] | transcript_product=sugar transporter ST2 | location=TGGT1_chrVIII:3928572-3933833(+) | protein_length=689 | sequence_SO=chromosome | SO=protein_coding_gene | is_pseudo=false	0.001	7.265	3	3	3	3	689	73.8	8.09	5.49	3	1.36	0.44	0.0123047	377.8	277.8	21.01	6.86	330.9	487.1	306.5	468.1	305.5	450.7	303.2	431.4	279.4	282.1	269.2	292.6	240.7	252.9	276.2	295.1	1
TGGT1_263680	Medium	IsMasterProtein	TGGT1_263680-t26_1-p1	transcript=TGGT1_263680-t26_1 | gene=TGGT1_263680 | organism=Toxoplasma_gondii_GT1 | gene_product=hypothetical protein | transcript_product=hypothetical protein | location=TGGT1_chrVIIb:370595-373613(-) | protein_length=181 | sequence_SO=chromosome | SO=protein_coding_gene | is_pseudo=false	0.011	2.659	5	1	1	1	181	21.3	9.92	2.62	1	1.344	0.43	0.00561155	26.1	19.4	7.11	15.21	28	27.6	25.8	26.4	25.8	25.9	26.7	21.9	26	16.2	17.3	19.8	19	21.3	19.1	22.3	1
TGGT1_224990	High	IsMasterProtein	TGGT1_224990-t26_1-p1	transcript=TGGT1_224990-t26_1 | gene=TGGT1_224990 | organism=Toxoplasma_gondii_GT1 | gene_product=hypothetical protein | transcript_product=hypothetical protein | location=TGGT1_chrX:2520021-2521786(-) | protein_length=154 | sequence_SO=chromosome | SO=protein_coding_gene | is_pseudo=false	0.005	3.478	16	1	1	1	154	17.1	8.75	3.71	1	1.346	0.43	0.0609909	14.3	10.6	12.53	22.76	12.3	13.7	12.3	14.9	12.8	16	15.5	16.9	10.2	13.3	9.9	11	8.5	8.7	15.1	14.7	1
TGGT1_278205	High	IsMasterProtein	TGGT1_278205-t26_1-p1	transcript=TGGT1_278205-t26_1 | gene=TGGT1_278205 | organism=Toxoplasma_gondii_GT1 | gene_product=hypothetical protein | transcript_product=hypothetical protein | location=TGGT1_chrXII:6140376-6167975(-) | protein_length=5626 | sequence_SO=chromosome | SO=protein_coding_gene | is_pseudo=false	0.001	6.12	1	2	2	2	5626	611.4	6.25	2.57	2	1.347	0.43	4.14668e-05	66.5	49.3	7.05	7.94	77	63.7	63.4	67.5	65.4	62.4	70.1	67.7	51.8	58.2	49.6	48.3	45.8	49.1	53.7	47.1	1
TGGT1_258710	High	IsMasterProtein	TGGT1_258710-t26_1-p1	transcript=TGGT1_258710-t26_1 | gene=TGGT1_258710 | organism=Toxoplasma_gondii_GT1 | gene_product=Tcp10_C domain-containing protein [Source:UniProtKB/TrEMBL;Acc:S7WEX5] | transcript_product=T-complex protein 10 domain-containing protein | location=TGGT1_chrVIIb:3194888-3203803(-) | protein_length=1731 | sequence_SO=chromosome | SO=protein_coding_gene | is_pseudo=false	0	15.928	4	6	6	6	1731	189.8	7.18	14.1	6	1.348	0.43	0.00499364	174	129.1	15.58	3.28	210.8	157.6	190.1	136.3	206.5	159.3	190.2	153.5	136.8	130	125.3	129.7	128.7	122.3	129.5	126.7	1
TGGT1_200385	High	IsMasterProtein	TGGT1_200385-t26_1-p1	transcript=TGGT1_200385-t26_1 | gene=TGGT1_200385 | organism=Toxoplasma_gondii_GT1 | gene_product=Myb family DNA-binding domain-containing protein [Source:UniProtKB/TrEMBL;Acc:S7V4J8] | transcript_product=Myb family DNA-binding domain-containing protein | location=TGGT1_chrVIII:6812546-6821202(-) | protein_length=2258 | sequence_SO=chromosome | SO=protein_coding_gene | is_pseudo=false	0.001	7.264	1	3	3	3	2258	245.7	6.18	3.58	3	1.349	0.43	0.000106086	81.5	60.4	6.98	9.1	80.8	68.5	86.1	81.7	83.4	78.7	81.2	86.4	53.1	56.9	53	67.7	64.1	61.1	64.9	59.6	1
TGGT1_247680	High	IsMasterProtein	TGGT1_247680-t26_1-p1	transcript=TGGT1_247680-t26_1 | gene=TGGT1_247680 | organism=Toxoplasma_gondii_GT1 | gene_product=hypothetical protein | transcript_product=hypothetical protein | location=TGGT1_chrXII:3408836-3417995(-) | protein_length=1933 | sequence_SO=chromosome | SO=protein_coding_gene | is_pseudo=false	0.003	3.828	1	1	1	1	1933	214.3	6.9	3.6	1	1.349	0.43	0.121403	7.6	5.6	21.31	22.86	5.8	9	10.6	6	6.9	8.4	8.3	6.5	7.1	5.6	5.6	6.8	4.4	5.5	5.3	8.9	1
TGGT1_288880	High	IsMasterProtein	TGGT1_288880-t26_1-p1	transcript=TGGT1_288880-t26_1 | gene=TGGT1_288880 | organism=Toxoplasma_gondii_GT1 | gene_product=hypothetical protein | transcript_product=hypothetical protein | location=TGGT1_chrIX:2596601-2599504(+) | protein_length=654 | sequence_SO=chromosome | SO=protein_coding_gene | is_pseudo=false	0.009	2.757	2	1	1	1	654	69.3	9.83	3.13	1	1.35	0.43	0.455044	7.2	5.3	25.98	41.09	5.8	8.1	6.5	9.8	5.5	8	8.3	4.3	9.1	3.6	4	4.8	4.2	6.9	10.4	5.9	1
TGGT1_226050	High	IsMasterProtein	TGGT1_226050-t26_1-p1	transcript=TGGT1_226050-t26_1 | gene=TGGT1_226050 | organism=Toxoplasma_gondii_GT1 | gene_product=RBR-type E3 ubiquitin transferase [Source:UniProtKB/TrEMBL;Acc:S7UWI8] | transcript_product=hypothetical protein | location=TGGT1_chrX:1753736-1757511(-) | protein_length=774 | sequence_SO=chromosome | SO=protein_coding_gene | is_pseudo=false	0.001	6.597	8	3	3	3	774	83.8	9.25	2.46	3	1.351	0.43	0.00442269	77.5	57.4	10.1	14.92	81	68.1	80.8	71	68.6	90.3	82.1	74.4	65.1	62.7	50	57.5	56.5	57.3	43.4	71.1	1
TGGT1_225570	Low	IsMasterProtein	TGGT1_225570-t26_1-p1	transcript=TGGT1_225570-t26_1 | gene=TGGT1_225570 | organism=Toxoplasma_gondii_GT1 | gene_product=hypothetical protein | transcript_product=hypothetical protein | location=TGGT1_chrX:2056420-2058573(-) | protein_length=717 | sequence_SO=chromosome | SO=protein_coding_gene | is_pseudo=false	0.053	1.391	1	1	3	1	717	82.1	5.2	2.03	1	1.336	0.42	0.0163117	167.2	125.2	16.37	4.03	163.4	205.4	131.1	171.2	139.6	175.4	130.8	181	123.9	123.2	121.5	136.1	126.5	127.2	121.1	130.8	1
TGGT1_222170	High	IsMasterProtein	TGGT1_222170-t26_1-p1	transcript=TGGT1_222170-t26_1 | gene=TGGT1_222170 | organism=Toxoplasma_gondii_GT1 | gene_product=Dense-granule antigen DG32 [Source:UniProtKB/TrEMBL;Acc:A0A125YI16] | transcript_product=dense-granule antigen DG32 | location=TGGT1_chrII:911318-912642(+) | protein_length=300 | sequence_SO=chromosome | SO=protein_coding_gene | is_pseudo=false	0	45.326	36	11	22	11	300	33.6	9.38	61.33	11	1.339	0.42	0.00692987	2927.5	2186.5	15.67	2.49	2568.1	3337.2	2546.4	3361.7	2403.1	3342.6	2468.9	3352.4	2099	2265.5	2231.6	2184.8	2159	2198.7	2123.2	2188.2	1
TGGT1_297880	High	IsMasterProtein	TGGT1_297880-t26_1-p1	transcript=TGGT1_297880-t26_1 | gene=TGGT1_297880 | organism=Toxoplasma_gondii_GT1 | gene_product=Dense granule protein DG32 [Source:UniProtKB/TrEMBL;Acc:A0A125YME3] | transcript_product=dense granule protein DG32 | location=TGGT1_chrII:2069382-2070384(-) | protein_length=219 | sequence_SO=chromosome | SO=protein_coding_gene | is_pseudo=false	0	27.259	49	7	14	7	219	24.1	9.57	41.81	7	1.341	0.42	0.000204805	1209.8	902.5	9.58	3.8	1108.7	1368.7	1132.8	1292.1	1127.6	1371.1	1131	1331.6	955.5	910.6	929.7	876	850.7	894.5	938.6	893.9	1
TGGT1_208360	Medium	IsMasterProtein	TGGT1_208360-t26_1-p1	transcript=TGGT1_208360-t26_1 | gene=TGGT1_208360 | organism=Toxoplasma_gondii_GT1 | gene_product=hypothetical protein | transcript_product=hypothetical protein | location=TGGT1_chrIb:646929-649886(+) | protein_length=985 | sequence_SO=chromosome | SO=protein_coding_gene | is_pseudo=false	0.013	2.489	1	1	1	1	985	107.2	7.46	2.43	1	1.326	0.41	0.145499	12.1	9.1	24.36	19.12	12.2	12.6	8.3	6.5	12	14.4	14.7	11.7	6.1	9.6	8.4	7.1	8.7	10.4	10.6	10.8	1
TGGT1_254230	Medium	IsMasterProtein	TGGT1_254230-t26_1-p1	transcript=TGGT1_254230-t26_1 | gene=TGGT1_254230 | organism=Toxoplasma_gondii_GT1 | gene_product=hypothetical protein | transcript_product=hypothetical protein | location=TGGT1_chrIII:1528189-1535496(+) | protein_length=656 | sequence_SO=chromosome | SO=protein_coding_gene | is_pseudo=false	0.015	2.322	1	1	1	1	656	73.4	10.1	1.98	1	1.329	0.41	8.78875e-06	121.7	91.5	7.56	5.71	118.6	121	137	122.4	131.1	113.1	139.9	120.2	90.6	92.5	87.3	92.6	83.8	101.4	92.5	88.1	1
TGGT1_219660	Low	IsMasterProtein	TGGT1_219660-t26_1-p1	transcript=TGGT1_219660-t26_1 | gene=TGGT1_219660 | organism=Toxoplasma_gondii_GT1 | gene_product=hypothetical protein | transcript_product=hypothetical protein | location=TGGT1_chrXII:687294-702774(-) | protein_length=4903 | sequence_SO=chromosome | SO=protein_coding_gene | is_pseudo=false	0.06	1.329	0	1	1	1	4903	542.3	9.33	2.97	1	1.331	0.41	4.95683e-05	530.8	398.8	7.21	8.88	539.8	481.4	563	522	598.1	504.2	573.4	517.4	342.8	437.4	368.7	404.2	393.5	409.5	347.1	422.6	1
TGGT1_263270	High	IsMasterProtein	TGGT1_263270-t26_1-p1	transcript=TGGT1_263270-t26_1 | gene=TGGT1_263270 | organism=Toxoplasma_gondii_GT1 | gene_product=GP-PDE domain-containing protein [Source:UniProtKB/TrEMBL;Acc:S7WDI7] | transcript_product=glycerophosphodiester phosphodiesterase family protein | location=TGGT1_chrVIIb:639824-647844(+) | protein_length=866 | sequence_SO=chromosome | SO=protein_coding_gene | is_pseudo=false	0	25.183	10	8	9	8	866	96	6.71	27.11	8	1.331	0.41	7.91844e-08	761	571.8	2.85	3.88	746.1	771.5	762.9	779	736.6	786.7	723.4	759.1	597.7	570.6	522.1	587	577.3	570.8	572.8	565.7	1
TGGT1_305790	High	IsMasterProtein	TGGT1_305790-t26_1-p1	transcript=TGGT1_305790-t26_1 | gene=TGGT1_305790 | organism=Toxoplasma_gondii_GT1 | gene_product=TYR_PHOSPHATASE_2 domain-containing protein [Source:UniProtKB/TrEMBL;Acc:S7UI48] | transcript_product=hypothetical protein | location=TGGT1_chrIX:5365824-5372699(-) | protein_length=1918 | sequence_SO=chromosome | SO=protein_coding_gene | is_pseudo=false	0.003	3.912	1	1	1	1	1918	206	5.77	3.73	1	1.333	0.41	0.000145235	65.3	49	7.36	9.11	60.7	66.8	66.4	63.5	66.5	72.7	56.5	64.3	50.7	51.8	45.9	54.6	40.6	47.6	45.3	50.4	1
TGGT1_207460B	High	IsMasterProtein	TGGT1_207460B-t26_1-p1	transcript=TGGT1_207460B-t26_1 | gene=TGGT1_207460B | organism=Toxoplasma_gondii_GT1 | gene_product=Rab5B protein [Source:UniProtKB/TrEMBL;Acc:S7UJV3] | transcript_product=Rab5B protein | location=TGGT1_chrIb:91448-95124(-) | protein_length=201 | sequence_SO=chromosome | SO=protein_coding_gene | is_pseudo=false	0	15.424	28	4	5	3	201	22.1	4.92	17.19	4	1.319	0.4	0.106971	25.4	19.3	35.14	19.09	30.5	14.4	33.9	20.2	44.1	21.6	29.9	21.1	25.2	13	20.3	17.6	18.6	20	20.1	15.8	1
TGGT1_207920	High	IsMasterProtein	TGGT1_207920-t26_1-p1	transcript=TGGT1_207920-t26_1 | gene=TGGT1_207920 | organism=Toxoplasma_gondii_GT1 | gene_product=hypothetical protein | transcript_product=hypothetical protein | location=TGGT1_chrIb:453863-457810(+) | protein_length=726 | sequence_SO=chromosome | SO=protein_coding_gene | is_pseudo=false	0	18.652	9	6	6	6	726	80.4	8.4	16.43	6	1.319	0.4	1.05518e-05	302.5	229.3	5.88	6.47	285.3	316	295.8	327	296.6	308.6	276.2	321	236.4	231.4	207.9	244.2	214.3	227.2	221.6	252.1	1
TGGT1_236010	High	IsMasterProtein	TGGT1_236010-t26_1-p1	transcript=TGGT1_236010-t26_1 | gene=TGGT1_236010 | organism=Toxoplasma_gondii_GT1 | gene_product=Prenylcys_lyase domain-containing protein [Source:UniProtKB/TrEMBL;Acc:A0A125YHU5] | transcript_product=prenylcysteine oxidase | location=TGGT1_chrX:5127788-5129623(-) | protein_length=611 | sequence_SO=chromosome | SO=protein_coding_gene | is_pseudo=false	0	18.687	12	7	8	6	611	68.1	7.59	17.12	7	1.319	0.4	6.77759e-05	567.7	430.4	8.03	7.02	519.7	592.6	553.1	582.7	537.6	656.2	525.5	597	399.6	456.8	401.2	437.7	400.2	465.6	423.2	471.7	1
TGGT1_223800	High	IsMasterProtein	TGGT1_223800-t26_1-p1	transcript=TGGT1_223800-t26_1 | gene=TGGT1_223800 | organism=Toxoplasma_gondii_GT1 | gene_product=Folate_rec domain-containing protein [Source:UniProtKB/TrEMBL;Acc:S7WBZ3] | transcript_product=hypothetical protein | location=TGGT1_chrX:3470121-3474892(+) | protein_length=526 | sequence_SO=chromosome | SO=protein_coding_gene | is_pseudo=false	0.001	7.159	4	2	3	2	526	57.1	8.19	7.64	2	1.322	0.4	0.0179982	165.9	125.6	14.96	6.41	179.8	132.9	175.9	136.9	191.7	135.4	184.1	156.6	134.3	124.4	121.6	124.8	136.3	126.4	122.1	144.9	1
TGGT1_216140	Medium	IsMasterProtein	TGGT1_216140-t26_1-p1	transcript=TGGT1_216140-t26_1 | gene=TGGT1_216140 | organism=Toxoplasma_gondii_GT1 | gene_product=Tetratricopeptide repeat-containing protein [Source:UniProtKB/TrEMBL;Acc:A0A125YUL1] | transcript_product=tetratricopeptide repeat-containing protein | location=TGGT1_chrXI:6302123-6306529(+) | protein_length=563 | sequence_SO=chromosome | SO=protein_coding_gene | is_pseudo=false	0.038	1.569	2	1	1	1	563	61.1	5.76	0	1	1.323	0.4	0.00337177	18.8	14.2	10.59	16.14	16.3	21.9	18.1	18.8	17.8	22.3	20.1	18.9	17	12.1	15.1	15.9	10.1	13.4	15.1	12.7	1
TGGT1_215775	High	IsMasterProtein	TGGT1_215775-t26_1-p1	transcript=TGGT1_215775-t26_1 | gene=TGGT1_215775 | organism=Toxoplasma_gondii_GT1 | gene_product=Protein kinase domain-containing protein [Source:UniProtKB/TrEMBL;Acc:A0A125YM30] | transcript_product=rhoptry protein ROP8 | location=TGGT1_chrX:7045451-7047178(+) | protein_length=575 | sequence_SO=chromosome | SO=protein_coding_gene | is_pseudo=false	0	55.489	33	12	39	10	575	65.4	9.09	117.74	12	1.324	0.4	8.03398e-07	2052.6	1550.7	4.8	4.37	1969.9	2177.7	2028	2090	1899.2	2129	1934.1	2077.4	1528.1	1527.5	1478	1615.4	1457.4	1650.9	1573.6	1601.1	1
TGGT1_311080	High	IsMasterProtein	TGGT1_311080-t26_1-p1	transcript=TGGT1_311080-t26_1 | gene=TGGT1_311080 | organism=Toxoplasma_gondii_GT1 | gene_product=Ion_trans domain-containing protein [Source:UniProtKB/TrEMBL;Acc:S7W232] | transcript_product=transporter, cation channel family protein | location=TGGT1_chrXI:1748172-1757111(-) | protein_length=1502 | sequence_SO=chromosome | SO=protein_coding_gene | is_pseudo=false	0.001	5.815	1	2	3	2	1502	160.1	6.73	6.92	2	1.308	0.39	1.33124e-06	233.8	178.7	5.36	5.56	254.6	232.3	226.6	227.5	248.6	226.2	256.5	235.4	184.7	186	180.8	176.7	165.6	162.8	164.7	183.8	1
TGGT1_233480	High	IsMasterProtein	TGGT1_233480-t26_1-p1	transcript=TGGT1_233480-t26_1 | gene=TGGT1_233480 | organism=Toxoplasma_gondii_GT1 | gene_product=SAG-related sequence SRS29C [Source:UniProtKB/TrEMBL;Acc:S7WBY8] | transcript_product=SAG-related sequence SRS29C | location=TGGT1_chrVIII:2667297-2668415(+) | protein_length=372 | sequence_SO=chromosome | SO=protein_coding_gene | is_pseudo=false	0	14.019	16	4	13	4	372	39.2	7.52	33.01	4	1.309	0.39	3.2507e-08	2465.2	1883.8	2.72	1.45	2363.7	2427	2502.6	2527.3	2340.3	2488.4	2452.5	2477.9	1887.4	1928.9	1937.7	1869.8	1869.2	1867.5	1880.2	1897.4	1	Methylthio [C303]
TGGT1_246770	High	IsMasterProtein	TGGT1_246770-t26_1-p1	transcript=TGGT1_246770-t26_1 | gene=TGGT1_246770 | organism=Toxoplasma_gondii_GT1 | gene_product=hypothetical protein | transcript_product=hypothetical protein | location=TGGT1_chrXII:2920917-2924365(+) | protein_length=543 | sequence_SO=chromosome | SO=protein_coding_gene | is_pseudo=false	0.002	4.963	3	2	2	2	543	58.8	7.78	4.06	2	1.311	0.39	0.00855515	41.2	31.4	12.33	11.38	41.7	40.6	32.1	37.1	44.9	35.1	45.7	44.2	29.9	29	34.2	36.8	35.7	33	26.7	29.1	1
TGGT1_262750	High	IsMasterProtein	TGGT1_262750-t26_1-p1	transcript=TGGT1_262750-t26_1 | gene=TGGT1_262750 | organism=Toxoplasma_gondii_GT1 | gene_product=SET domain-containing protein [Source:UniProtKB/TrEMBL;Acc:S7WE18] | transcript_product=putative histone lysine methyltransferase, SET | location=TGGT1_chrVIIb:1017289-1018854(-) | protein_length=521 | sequence_SO=chromosome | SO=protein_coding_gene | is_pseudo=false	0	12.148	7	4	5	4	521	53.6	5.36	11.64	4	1.312	0.39	5.83093e-07	424.9	323.9	4.2	4.4	452.8	429.7	423.7	391.6	426.1	408.2	428.8	418	303.5	323.3	315.5	350.7	320.2	324.5	329.3	338.7	1
TGGT1_251540	High	IsMasterProtein	TGGT1_251540-t26_1-p1	transcript=TGGT1_251540-t26_1 | gene=TGGT1_251540 | organism=Toxoplasma_gondii_GT1 | gene_product=Dense granule protein GRA9 [Source:UniProtKB/TrEMBL;Acc:A0A125YWK4] | transcript_product=dense granule protein GRA9 | location=TGGT1_chrXII:5372511-5374084(+) | protein_length=318 | sequence_SO=chromosome | SO=protein_coding_gene | is_pseudo=false	0	35.867	30	9	28	9	318	35.3	5.39	67.73	9	1.313	0.39	3.78386e-08	2229.2	1698	3.13	3.45	2143.3	2252.8	2205.8	2300.3	2135.1	2282.7	2160.8	2294.8	1701.8	1772.1	1667.3	1769.9	1632.7	1630.1	1694.3	1760.7	1
TGGT1_274050	High	IsMasterProtein	TGGT1_274050-t26_1-p1	transcript=TGGT1_274050-t26_1 | gene=TGGT1_274050 | organism=Toxoplasma_gondii_GT1 | gene_product=hypothetical protein | transcript_product=hypothetical protein | location=TGGT1_chrVIII:3049359-3052978(+) | protein_length=304 | sequence_SO=chromosome | SO=protein_coding_gene | is_pseudo=false	0	21.184	23	6	8	6	304	34.8	9.31	27.87	6	1.313	0.39	1.26436e-05	159.7	121.6	4.15	6.18	150.1	170.2	160.3	159.3	162.1	151.4	153.6	160.1	140.3	124.5	119	122.3	118.2	120.9	129.7	117.4	1
TGGT1_257020	High	IsMasterProtein	TGGT1_257020-t26_1-p1	transcript=TGGT1_257020-t26_1 | gene=TGGT1_257020 | organism=Toxoplasma_gondii_GT1 | gene_product=hypothetical protein | transcript_product=hypothetical protein | location=TGGT1_chrVIIb:4210014-4214348(-) | protein_length=404 | sequence_SO=chromosome | SO=protein_coding_gene | is_pseudo=false	0.009	2.843	3	1	1	1	404	44.6	5.8	2.67	1	1.297	0.38	0.0397566	16.9	13	13.92	16.31	11.2	18.5	18.1	17.1	16.6	17.1	15.5	16.7	11.7	14.5	12.9	9	13.1	16.4	13.2	12.8	1
TGGT1_200290	High	IsMasterProtein	TGGT1_200290-t26_1-p1	transcript=TGGT1_200290-t26_1 | gene=TGGT1_200290 | organism=Toxoplasma_gondii_GT1 | gene_product=RHOMBOID-like protein [Source:UniProtKB/TrEMBL;Acc:A0A125YGU9] | transcript_product=rhomboid protease ROM1 | location=TGGT1_chrVIII:6751037-6753945(+) | protein_length=293 | sequence_SO=chromosome | SO=protein_coding_gene | is_pseudo=false	0.003	4.039	6	1	1	1	293	32.8	7.8	5.12	1	1.299	0.38	0.105513	22.6	17.4	23.41	8.02	15.7	15	23.6	18.6	28.7	21.7	27.2	25.1	17.4	18.1	18.7	17.5	19.5	15.9	15.8	15.9	1
TGGT1_257530	High	IsMasterProtein	TGGT1_257530-t26_1-p1	transcript=TGGT1_257530-t26_1 | gene=TGGT1_257530 | organism=Toxoplasma_gondii_GT1 | gene_product=Transporter, major facilitator family protein [Source:UniProtKB/TrEMBL;Acc:S7W7U8] | transcript_product=transporter, major facilitator family protein | location=TGGT1_chrVIIb:3924727-3926365(-) | protein_length=504 | sequence_SO=chromosome | SO=protein_coding_gene | is_pseudo=false	0	27.286	19	7	22	7	504	54.5	6.71	55.99	7	1.299	0.38	9.62851e-07	2755.5	2120.7	3.52	1.15	2927.6	2703.9	2832.4	2668.7	2837.3	2669.7	2808	2684.9	2071	2116.5	2138.2	2124.9	2146.8	2114.3	2095.1	2129.2	1
TGGT1_231950	High	IsMasterProtein	TGGT1_231950-t26_1-p1	transcript=TGGT1_231950-t26_1 | gene=TGGT1_231950 | organism=Toxoplasma_gondii_GT1 | gene_product=hypothetical protein | transcript_product=hypothetical protein | location=TGGT1_chrVIII:1662317-1664386(+) | protein_length=381 | sequence_SO=chromosome | SO=protein_coding_gene | is_pseudo=false	0.001	7.152	8	2	2	2	381	41.8	5.3	5.61	2	1.302	0.38	0.00147328	20.7	15.9	7.9	11.46	19.3	20.8	21.1	20.6	18	19.8	23.4	22	16.2	14.1	14.9	14.3	17.7	15.7	19.6	16.1	1
TGGT1_311780	High	IsMasterProtein	TGGT1_311780-t26_1-p1	transcript=TGGT1_311780-t26_1 | gene=TGGT1_311780 | organism=Toxoplasma_gondii_GT1 | gene_product=PKS_ER domain-containing protein [Source:UniProtKB/TrEMBL;Acc:A0A125YU49] | transcript_product=Zn-containing alcohol dehydrogenase | location=TGGT1_chrXI:2246268-2252387(-) | protein_length=397 | sequence_SO=chromosome | SO=protein_coding_gene | is_pseudo=false	0.002	4.895	4	2	2	2	397	42.5	7.02	5.11	2	1.302	0.38	1.11125e-05	199.7	153.4	5.9	6.77	198	214.2	196.1	217.2	198.7	200.7	192.9	226.6	164.2	152.3	150.9	165.2	145	154.4	135.7	164.1	1
TGGT1_313630	High	IsMasterProtein	TGGT1_313630-t26_1-p1	transcript=TGGT1_313630-t26_1 | gene=TGGT1_313630 | organism=Toxoplasma_gondii_GT1 | gene_product=hypothetical protein | transcript_product=hypothetical protein | location=TGGT1_chrXI:3490678-3536755(-) | protein_length=13453 | sequence_SO=chromosome | SO=protein_coding_gene | is_pseudo=false	0.009	2.848	0	2	3	1	13453	1450.5	8.69	5.97	2	1.302	0.38	0.0494338	204.3	156.9	24.74	6.94	155.6	261.5	156.3	250.2	156.6	264.9	172	242.8	137.3	146.6	159	161.1	154.9	164.7	164	140.9	1
TGGT1_268390	Medium	IsMasterProtein	TGGT1_268390-t26_1-p1	transcript=TGGT1_268390-t26_1 | gene=TGGT1_268390 | organism=Toxoplasma_gondii_GT1 | gene_product=hypothetical protein | transcript_product=hypothetical protein | location=TGGT1_chrVIII:6462060-6463139(+) | protein_length=359 | sequence_SO=chromosome | SO=protein_coding_gene | is_pseudo=false	0.016	2.258	6	1	1	1	359	37.7	5.22	0	1	1.303	0.38	0.922751	9.6	7.4	37.58	20.62	13.6	9.5	5.9	11.2	3	11.9	9.7	7.9	11.1	7.5	7.2	9.4	10.1	6.9	6.5	7.2	1
TGGT1_278270	Medium	IsMasterProtein	TGGT1_278270-t26_1-p1	transcript=TGGT1_278270-t26_1 | gene=TGGT1_278270 | organism=Toxoplasma_gondii_GT1 | gene_product=Putative nucleolar protein, structural component of H/ACA snoRNP [Source:UniProtKB/TrEMBL;Acc:A0A125YM51] | transcript_product=putative nucleolar protein, structural component of H/ACA snoRNP | location=TGGT1_chrXII:6093021-6093957(+) | protein_length=64 | sequence_SO=chromosome | SO=protein_coding_g…	0.021	1.939	13	1	1	1	64	7.5	9.63	2.49	1	1.303	0.38	0.0692068	50.5	38.8	18.53	17.74	52.8	49.3	51.7	38.9	59.2	31.1	52.8	48.9	32.2	42.2	25.1	35.7	39.4	47	38.2	40.4	1
TGGT1_318750	High	IsMasterProtein	TGGT1_318750-t26_1-p1	transcript=TGGT1_318750-t26_1 | gene=TGGT1_318750 | organism=Toxoplasma_gondii_GT1 | gene_product=Deoxyribose-phosphate aldolase [Source:UniProtKB/TrEMBL;Acc:A0A125YRB3] | transcript_product=deoxyribose-phosphate aldolase | location=TGGT1_chrIV:1051713-1052817(+) | protein_length=286 | sequence_SO=chromosome | SO=protein_coding_gene | is_pseudo=false	0.001	6.716	8	2	3	2	286	30.9	5.24	7.23	2	1.303	0.38	9.7198e-08	297.3	228.1	2.95	3.7	287.3	300.1	301.8	295.8	287.1	278	301.4	298.8	224.9	241.7	231.6	230.1	222.5	212.3	226.1	230.1	1
TGGT1_216030A	High	IsMasterProtein	TGGT1_216030A-t26_1-p1	transcript=TGGT1_216030A-t26_1 | gene=TGGT1_216030A | organism=Toxoplasma_gondii_GT1 | gene_product=VHS domain-containing protein [Source:UniProtKB/TrEMBL;Acc:S7VUC1] | transcript_product=hypothetical protein | location=TGGT1_chrXI:6370763-6377548(-) | protein_length=1127 | sequence_SO=chromosome | SO=protein_coding_gene | is_pseudo=false	0.006	3.15	1	1	1	1	1127	116.3	6.09	2.28	1	1.304	0.38	0.00678442	111.1	85.2	16.46	8.68	91.7	119.7	92	133.1	93	128.7	103.2	130	89	82.9	80.1	86.9	86.2	84.2	66.7	88	1
TGGT1_227930	Medium	IsMasterProtein	TGGT1_227930-t26_1-p1	transcript=TGGT1_227930-t26_1 | gene=TGGT1_227930 | organism=Toxoplasma_gondii_GT1 | gene_product=hypothetical protein | transcript_product=hypothetical protein | location=TGGT1_chrX:638021-643944(-) | protein_length=1554 | sequence_SO=chromosome | SO=protein_coding_gene | is_pseudo=false	0.031	1.652	0	1	2	1	1554	169.5	8.51	4.29	1	1.304	0.38	0.0474602	374	286.9	20.1	8.6	297.8	442.9	296.2	438.1	276.9	429.3	326.2	428.8	259.7	317.1	287.9	324	261.3	298.2	265.4	285.9	1
TGGT1_228510	Low	IsMasterProtein	TGGT1_228510-t26_1-p1	transcript=TGGT1_228510-t26_1 | gene=TGGT1_228510 | organism=Toxoplasma_gondii_GT1 | gene_product=hypothetical protein | transcript_product=hypothetical protein | location=TGGT1_chrX:188728-195365(+) | protein_length=959 | sequence_SO=chromosome | SO=protein_coding_gene | is_pseudo=false	0.081	1.176	1	1	1	1	959	106.5	6.43	0	1	1.304	0.38	0.0035564	82.3	63.1	10.47	14.68	83.5	81.9	63.6	89	79.6	82.6	74.4	89.8	67.9	65.7	62.8	55.2	65.8	63.3	43.7	50.1	1
TGGT1_271030	Medium	IsMasterProtein	TGGT1_271030-t26_1-p1	transcript=TGGT1_271030-t26_1 | gene=TGGT1_271030 | organism=Toxoplasma_gondii_GT1 | gene_product=AP2/ERF domain-containing protein [Source:UniProtKB/TrEMBL;Acc:S7WKC9] | transcript_product=AP2 domain transcription factor AP2VIII-6 | location=TGGT1_chrVIII:4761950-4767241(+) | protein_length=1763 | sequence_SO=chromosome | SO=protein_coding_gene | is_pseudo=false	0.038	1.57	1	1	1	1	1763	184.2	7.88	0	1	1.305	0.38	0.0143389	28.7	22	10.06	18.16	30	30.4	31.1	26.3	22.2	28.9	28.5	28.4	23.1	18.7	27.6	22.9	17.4	25.7	21.1	16.6	1
TGGT1_311100	High	IsMasterProtein	TGGT1_311100-t26_1-p1	transcript=TGGT1_311100-t26_1 | gene=TGGT1_311100 | organism=Toxoplasma_gondii_GT1 | gene_product=Zinc finger (CCCH type) motif-containing protein [Source:UniProtKB/TrEMBL;Acc:S7UU40] | transcript_product=zinc finger (CCCH type) motif-containing protein | location=TGGT1_chrXI:1771325-1774934(+) | protein_length=919 | sequence_SO=chromosome | SO=protein_coding_gene | is_pseudo=false	0	40.569	16	12	14	12	919	98.7	8.6	38.63	12	1.305	0.38	2.36513e-06	960.7	736.3	1.81	4.43	959.2	950.8	962.5	952.5	986.2	962.1	928.3	976	669	758.1	730.4	750.6	707.4	742.3	714.1	768.3	1
TGGT1_235550	Low	IsMasterProtein	TGGT1_235550-t26_1-p1	transcript=TGGT1_235550-t26_1 | gene=TGGT1_235550 | organism=Toxoplasma_gondii_GT1 | gene_product=PHD-type domain-containing protein [Source:UniProtKB/TrEMBL;Acc:S7VZQ2] | transcript_product=PHD-finger domain-containing protein | location=TGGT1_chrX:4828914-4834176(+) | protein_length=556 | sequence_SO=chromosome | SO=protein_coding_gene | is_pseudo=false	0.071	1.243	2	1	1	1	556	59.7	7.37	0	1	1.289	0.37	0.252631	11.9	9.3	31.3	11.86	10.5	13.5	9.9	14.8	5.9	16.8	8.2	14	9.1	7.9	7.7	9.8	10.4	8.2	10.3	9.4	1	Methylthio [C454]
TGGT1_257390	High	IsMasterProtein	TGGT1_257390-t26_1-p1	transcript=TGGT1_257390-t26_1 | gene=TGGT1_257390 | organism=Toxoplasma_gondii_GT1 | gene_product=EngB-type G domain-containing protein [Source:UniProtKB/TrEMBL;Acc:S7WF40] | transcript_product=ribosome biogenesis GTP-binding protein YsxC protein | location=TGGT1_chrVIIb:3999896-4011168(+) | protein_length=1499 | sequence_SO=chromosome | SO=protein_coding_gene | is_pseudo=false	0	8.503	2	3	3	3	1499	164.8	10.01	6.36	3	1.289	0.37	0.000774051	106.8	82.9	7.25	9.69	104.7	108.8	104.8	109.7	110.1	115	89.9	100.6	88.8	74.4	89.3	82.9	73	75.4	95	82.9	1
TGGT1_262710	High	IsMasterProtein	TGGT1_262710-t26_1-p1	transcript=TGGT1_262710-t26_1 | gene=TGGT1_262710 | organism=Toxoplasma_gondii_GT1 | gene_product=Copper transporter [Source:UniProtKB/TrEMBL;Acc:S7W6R7] | transcript_product=Ctr copper transporter family protein | location=TGGT1_chrVIIb:1040235-1042044(+) | protein_length=375 | sequence_SO=chromosome | SO=protein_coding_gene | is_pseudo=false	0	45.012	26	10	21	10	375	40.6	8.24	86.48	10	1.29	0.37	0.00210987	1932.3	1497.7	12.24	6.16	2108.1	1716	2182.5	1679.5	2202.8	1771.2	2158.2	1726.3	1603.1	1391.7	1517.8	1477.8	1588	1357.4	1562.6	1432.4	1
TGGT1_217340	Medium	IsMasterProtein	TGGT1_217340-t26_1-p1	transcript=TGGT1_217340-t26_1 | gene=TGGT1_217340 | organism=Toxoplasma_gondii_GT1 | gene_product=hypothetical protein | transcript_product=hypothetical protein | location=TGGT1_chrXII:1698424-1701882(+) | protein_length=785 | sequence_SO=chromosome | SO=protein_coding_gene | is_pseudo=false	0.018	2.087	2	1	1	1	785	84.9	6.1	1.67	1	1.292	0.37	0.156814	9	7	26.79	24.17	11.4	11.6	7.4	5.8	8.1	7.2	12.6	10	10.5	8	6.8	6.9	5.9	7.7	4.5	7	1
TGGT1_264000	High	IsMasterProtein	TGGT1_264000-t26_1-p1	transcript=TGGT1_264000-t26_1 | gene=TGGT1_264000 | organism=Toxoplasma_gondii_GT1 | gene_product=Aldedh domain-containing protein [Source:UniProtKB/TrEMBL;Acc:S7UXI8] | transcript_product=aldehyde dehydrogenase | location=TGGT1_chrVIIb:213798-224025(-) | protein_length=624 | sequence_SO=chromosome | SO=protein_coding_gene | is_pseudo=false	0	21.416	15	7	8	7	624	69	6.9	20.74	7	1.294	0.37	1.08703e-06	1241.1	959.3	4.52	3	1311.6	1178.5	1298.7	1199.5	1265.4	1172.1	1288.3	1217.4	993.5	981.5	1020.7	958.2	944.4	942.9	960.3	937.2	1
TGGT1_214090	High	IsMasterProtein	TGGT1_214090-t26_1-p1	transcript=TGGT1_214090-t26_1 | gene=TGGT1_214090 | organism=Toxoplasma_gondii_GT1 | gene_product=Signal peptidase [Source:UniProtKB/TrEMBL;Acc:S7W5I3] | transcript_product=signal peptidase | location=TGGT1_chrX:5908335-5920860(+) | protein_length=1859 | sequence_SO=chromosome | SO=protein_coding_gene | is_pseudo=false	0	157.043	30	47	67	47	1859	203.4	5.82	192.39	47	1.296	0.37	1.06865e-09	5336.9	4116.7	2.19	2.23	5414.6	5272.4	5554.4	5197.9	5363.1	5310.8	5395.6	5216.6	4261.1	4040	4142.5	4114.5	4054.4	4118.8	4289.7	4074.5	1
TGGT1_218730	Medium	IsMasterProtein	TGGT1_218730-t26_1-p1	transcript=TGGT1_218730-t26_1 | gene=TGGT1_218730 | organism=Toxoplasma_gondii_GT1 | gene_product=hypothetical protein | transcript_product=hypothetical protein | location=TGGT1_chrXII:1285339-1286622(+) | protein_length=256 | sequence_SO=chromosome | SO=protein_coding_gene | is_pseudo=false	0.016	2.271	5	1	1	1	256	27.5	7.53	1.67	1	1.297	0.37	0.0541137	19.3	14.9	19.76	13.31	24.9	23.1	17	20.7	12.7	19.4	19.2	17	17.1	12.3	17.7	15.8	13.3	16.5	13.6	14	1
TGGT1_244860	Medium	IsMasterProtein	TGGT1_244860-t26_1-p1	transcript=TGGT1_244860-t26_1 | gene=TGGT1_244860 | organism=Toxoplasma_gondii_GT1 | gene_product=hypothetical protein | transcript_product=hypothetical protein | location=TGGT1_chrVI:3453919-3457972(-) | protein_length=381 | sequence_SO=chromosome | SO=protein_coding_gene | is_pseudo=false	0.018	2.02	3	1	1	1	381	42.7	5.15	1.93	1	1.28	0.36	0.126837	18.2	14.2	22.24	20.05	25.4	17.5	21.8	12.6	23.4	15.4	19	17.5	12.1	13.6	15.7	14.9	19.7	13.4	19.9	12.5	1
TGGT1_270570	Medium	IsMasterProtein	TGGT1_270570-t26_1-p1	transcript=TGGT1_270570-t26_1 | gene=TGGT1_270570 | organism=Toxoplasma_gondii_GT1 | gene_product=hypothetical protein | transcript_product=hypothetical protein | location=TGGT1_chrVIII:5177777-5186762(-) | protein_length=1580 | sequence_SO=chromosome | SO=protein_coding_gene | is_pseudo=false	0.022	1.91	1	1	3	1	1580	169.1	8.32	5.26	1	1.28	0.36	0.000564671	231.7	181.1	4.22	8.64	226.6	230.1	216.9	233.4	243.3	239.9	233.3	216.7	185.3	175.1	190.9	207.8	161.1	171.6	202.6	177	1
TGGT1_231100	High	IsMasterProtein	TGGT1_231100-t26_1-p1	transcript=TGGT1_231100-t26_1 | gene=TGGT1_231100 | organism=Toxoplasma_gondii_GT1 | gene_product=hypothetical protein | transcript_product=hypothetical protein | location=TGGT1_chrVIII:1232359-1236169(+) | protein_length=492 | sequence_SO=chromosome | SO=protein_coding_gene | is_pseudo=false	0	24.074	18	7	10	7	492	53.8	6.48	24.29	7	1.283	0.36	1.67605e-06	629.9	490.8	4.74	2.66	695.4	640.8	626.9	632.9	623.4	624.9	653.2	589.6	481.1	501.5	475.7	513.5	483.8	481.7	497.9	499.7	1
TGGT1_264210	Medium	IsMasterProtein	TGGT1_264210-t26_1-p1	transcript=TGGT1_264210-t26_1 | gene=TGGT1_264210 | organism=Toxoplasma_gondii_GT1 | gene_product=hypothetical protein | transcript_product=hypothetical protein | location=TGGT1_chrVIIb:51171-54728(-) | protein_length=1185 | sequence_SO=chromosome | SO=protein_coding_gene | is_pseudo=false	0.045	1.463	1	1	1	1	1185	123.6	9.54	1.62	1	1.283	0.36	0.448896	13.1	10.2	17.28	25.94	14	11.8	14.2	13.9	9.6	10.4	12.3	16.3	14.2	9.9	9.9	8.8	17.1	13.7	10.6	8.9	1
TGGT1_212210	High	IsMasterProtein	TGGT1_212210-t26_1-p1	transcript=TGGT1_212210-t26_1 | gene=TGGT1_212210 | organism=Toxoplasma_gondii_GT1 | gene_product=hypothetical protein | transcript_product=hypothetical protein | location=TGGT1_chrX:3883183-3884263(-) | protein_length=280 | sequence_SO=chromosome | SO=protein_coding_gene | is_pseudo=false	0	18.537	24	5	10	5	280	28.9	4.13	19.19	5	1.284	0.36	0.0231473	290.9	226.5	13.52	13.93	322.9	303.2	265.6	332.8	279	220	308.2	250.6	197	224.2	220.5	176.9	255.5	228.9	240.6	277.8	1
TGGT1_258590	High	IsMasterProtein	TGGT1_258590-t26_1-p1	transcript=TGGT1_258590-t26_1 | gene=TGGT1_258590 | organism=Toxoplasma_gondii_GT1 | gene_product=hypothetical protein | transcript_product=hypothetical protein | location=TGGT1_chrVIIb:3279124-3285716(+) | protein_length=1292 | sequence_SO=chromosome | SO=protein_coding_gene | is_pseudo=false	0.004	3.549	1	1	1	1	1292	140.9	9.23	3	1	1.284	0.36	0.141611	29.1	22.7	15.42	22.99	20	27.7	33.4	30.6	26.2	32	25.7	30.9	17.3	21.1	20.1	31.2	18.2	24.4	31.2	24.4	1
TGGT1_253350	High	IsMasterProtein	TGGT1_253350-t26_1-p1	transcript=TGGT1_253350-t26_1 | gene=TGGT1_253350 | organism=Toxoplasma_gondii_GT1 | gene_product=hypothetical protein | transcript_product=hypothetical protein | location=TGGT1_chrIII:845534-850880(+) | protein_length=811 | sequence_SO=chromosome | SO=protein_coding_gene | is_pseudo=false	0	16.516	8	5	6	5	811	88.1	9.36	18.88	5	1.287	0.36	0.00189927	176.6	137.1	11.12	10.33	203.5	156.3	177.3	157.8	180.8	164.9	210.3	175.8	158	124.6	137.3	156.6	141.9	118.5	128.1	137	1
TGGT1_225540	High	IsMasterProtein	TGGT1_225540-t26_1-p1	transcript=TGGT1_225540-t26_1 | gene=TGGT1_225540 | organism=Toxoplasma_gondii_GT1 | gene_product=hypothetical protein | transcript_product=hypothetical protein | location=TGGT1_chrX:2080834-2083264(-) | protein_length=485 | sequence_SO=chromosome | SO=protein_coding_gene | is_pseudo=false	0	40.332	26	10	20	10	485	50.9	4.77	55.3	10	1.272	0.35	4.09435e-07	1802.2	1416.9	4.03	3.78	1776.8	1875.1	1718.5	1864.4	1775.4	1931.7	1743.2	1827.8	1413.2	1485.9	1380.2	1434.9	1344.8	1420.6	1385.4	1504.6	1	Methylthio [C387]
TGGT1_311010	High	IsMasterProtein	TGGT1_311010-t26_1-p1	transcript=TGGT1_311010-t26_1 | gene=TGGT1_311010 | organism=Toxoplasma_gondii_GT1 | gene_product=hypothetical protein | transcript_product=hypothetical protein | location=TGGT1_chrXI:1687767-1688366(-) | protein_length=199 | sequence_SO=chromosome | SO=protein_coding_gene | is_pseudo=false	0	9.987	16	3	5	3	199	21.5	6.89	10.79	3	1.272	0.35	0.000160544	386.2	303.7	7.24	6.67	397	376.6	413.1	352	424	382.6	389.7	342.7	330.5	307.3	291.4	276.2	301.2	286	334	306.2	1
TGGT1_218560	High	IsMasterProtein	TGGT1_218560-t26_1-p1	transcript=TGGT1_218560-t26_1 | gene=TGGT1_218560 | organism=Toxoplasma_gondii_GT1 | gene_product=Acetyl-coA carboxylase ACC2 [Source:UniProtKB/TrEMBL;Acc:S7V1W6] | transcript_product=acetyl-coA carboxylase ACC2 | location=TGGT1_chrXII:1367542-1396474(-) | protein_length=3400 | sequence_SO=chromosome | SO=protein_coding_gene | is_pseudo=false	0	18.765	2	5	6	4	3400	365	6.84	16.63	5	1.275	0.35	0.0440089	41.4	32.5	11.01	20.16	41.5	47.8	40.4	41.2	35.5	49.7	45.8	39.7	38.4	25	29	38.1	32.8	31.8	47.6	32.1	1
TGGT1_316570A	High	IsMasterProtein	TGGT1_316570A-t26_1-p1	transcript=TGGT1_316570A-t26_1 | gene=TGGT1_316570A | organism=Toxoplasma_gondii_GT1 | gene_product=hypothetical protein | transcript_product=hypothetical protein | location=TGGT1_chrXI:5348414-5350532(-) | protein_length=468 | sequence_SO=chromosome | SO=protein_coding_gene | is_pseudo=false	0.002	5.002	5	2	3	2	468	51.2	9.73	5.9	2	1.276	0.35	0.0169644	51.8	40.6	10.39	13.07	52.8	59.2	51.2	48	52.1	53.2	40.5	51.4	38.1	45.7	46.4	35.3	36.5	51	41.3	39.8	1
TGGT1_284610	Medium	IsMasterProtein	TGGT1_284610-t26_1-p1	transcript=TGGT1_284610-t26_1 | gene=TGGT1_284610 | organism=Toxoplasma_gondii_GT1 | gene_product=hypothetical protein | transcript_product=hypothetical protein | location=TGGT1_chrV:2524287-2525567(-) | protein_length=426 | sequence_SO=chromosome | SO=protein_coding_gene | is_pseudo=false	0.042	1.496	1	1	1	1	426	46.4	10.13	2.58	1	1.277	0.35	0.0137759	118	92.4	16.08	10.28	104.6	141.9	105.6	146.2	100.5	131.9	105.1	139	111.3	83.3	91.1	97	87.7	86.9	106	93.7	1
TGGT1_247050	High	IsMasterProtein	TGGT1_247050-t26_1-p1	transcript=TGGT1_247050-t26_1 | gene=TGGT1_247050 | organism=Toxoplasma_gondii_GT1 | gene_product=hypothetical protein | transcript_product=hypothetical protein | location=TGGT1_chrXII:3061422-3074479(+) | protein_length=2660 | sequence_SO=chromosome | SO=protein_coding_gene | is_pseudo=false	0	12.108	2	5	5	5	2660	287.1	6.68	10.79	5	1.263	0.34	0.000575057	92.9	73.6	9.45	5.8	89	96.8	80	95.8	86	108.6	98.8	90.2	73.6	67.3	76.9	71.5	66.7	75	73.6	78.6	1
TGGT1_216030B	High	IsMasterProtein	TGGT1_216030B-t26_1-p1	transcript=TGGT1_216030B-t26_1 | gene=TGGT1_216030B | organism=Toxoplasma_gondii_GT1 | gene_product=hypothetical protein | transcript_product=hypothetical protein | location=TGGT1_chrXI:6369639-6370661(-) | protein_length=340 | sequence_SO=chromosome | SO=protein_coding_gene | is_pseudo=false	0.003	4.555	6	2	3	2	340	35	4.37	7.98	2	1.265	0.34	0.0692219	87.1	68.8	19	6.45	72.6	97.9	59.2	100.7	80.6	94	74.1	105	71.3	68.1	69	76.3	61.6	65.4	72.4	68.6	1
TGGT1_257980	High	IsMasterProtein	TGGT1_257980-t26_1-p1	transcript=TGGT1_257980-t26_1 | gene=TGGT1_257980 | organism=Toxoplasma_gondii_GT1 | gene_product=RRF domain-containing protein [Source:UniProtKB/TrEMBL;Acc:S7UYJ6] | transcript_product=ribosome recycling factor protein | location=TGGT1_chrVIIb:3647916-3653274(-) | protein_length=468 | sequence_SO=chromosome | SO=protein_coding_gene | is_pseudo=false	0.003	4.833	4	2	3	2	468	52	10.62	7.1	2	1.265	0.34	0.00133745	78.9	62.4	8.86	6.16	81	77	63.8	72.5	84.9	76.1	80.8	83.7	61.4	67.1	60.4	62.6	65	62.1	66.6	55.2	1
TGGT1_247780	High	IsMasterProtein	TGGT1_247780-t26_1-p1	transcript=TGGT1_247780-t26_1 | gene=TGGT1_247780 | organism=Toxoplasma_gondii_GT1 | gene_product=hypothetical protein | transcript_product=hypothetical protein | location=TGGT1_chrXII:3515889-3518645(-) | protein_length=267 | sequence_SO=chromosome | SO=protein_coding_gene | is_pseudo=false	0	10.957	12	2	3	2	267	29	7.12	10.97	2	1.266	0.34	3.64699e-05	159.8	126.2	5.19	5.76	166.2	144.5	169.4	157.9	167.6	154.8	154.9	161.7	120.4	120.7	123.9	133.1	125.4	139.8	127	137.1	1
TGGT1_271460	High	IsMasterProtein	TGGT1_271460-t26_1-p1	transcript=TGGT1_271460-t26_1 | gene=TGGT1_271460 | organism=Toxoplasma_gondii_GT1 | gene_product=Hydrolase_4 domain-containing protein [Source:UniProtKB/TrEMBL;Acc:S7V3V0] | transcript_product=putative protein c14orf29 | location=TGGT1_chrVIII:4472962-4481955(+) | protein_length=884 | sequence_SO=chromosome | SO=protein_coding_gene | is_pseudo=false	0	12.29	5	4	7	4	884	97.6	7.62	12.54	4	1.267	0.34	0.00653818	266	209.9	11.55	6.31	233.1	266.8	261.4	284.7	265.2	301.1	206.1	282.2	205	200.2	212.6	211.8	208.1	196.1	237.6	223.6	1
TGGT1_267050	High	IsMasterProtein	TGGT1_267050-t26_1-p1	transcript=TGGT1_267050-t26_1 | gene=TGGT1_267050 | organism=Toxoplasma_gondii_GT1 | gene_product=Hydrolase_4 domain-containing protein [Source:UniProtKB/TrEMBL;Acc:A0A125YZJ0] | transcript_product=hydrolase, alpha/beta fold family protein | location=TGGT1_chrIX:638270-640900(+) | protein_length=308 | sequence_SO=chromosome | SO=protein_coding_gene | is_pseudo=false	0	26.919	28	8	11	8	308	34	7.02	27.83	8	1.268	0.34	3.87254e-05	1243.7	980.6	6.43	3.71	1319.2	1177	1336.3	1163.1	1334	1183.6	1306.9	1176.4	998.8	967.4	1034.9	962.2	993.9	950	1027.2	932.7	1
TGGT1_308010	High	IsMasterProtein	TGGT1_308010-t26_1-p1	transcript=TGGT1_308010-t26_1 | gene=TGGT1_308010 | organism=Toxoplasma_gondii_GT1 | gene_product=hypothetical protein | transcript_product=hypothetical protein | location=TGGT1_chrXII:450752-454345(-) | protein_length=1197 | sequence_SO=chromosome | SO=protein_coding_gene | is_pseudo=false	0.009	2.856	1	2	2	2	1197	129.4	5.91	0	2	1.268	0.34	0.0174448	80.6	63.6	14.6	11.55	79.8	89.2	57.9	86.3	73.2	94.9	72.2	81.4	67.7	67.7	53.8	68.4	56.5	59.7	54.4	72.1	1
TGGT1_274090	High	IsMasterProtein	TGGT1_274090-t26_1-p1	transcript=TGGT1_274090-t26_1 | gene=TGGT1_274090 | organism=Toxoplasma_gondii_GT1 | gene_product=zf-Tim10_DDP domain-containing protein [Source:UniProtKB/TrEMBL;Acc:A0A125YYX5] | transcript_product=hypothetical protein | location=TGGT1_chrVIII:3029777-3030879(+) | protein_length=86 | sequence_SO=chromosome | SO=protein_coding_gene | is_pseudo=false	0.003	3.897	13	1	1	1	86	9.8	7.81	2.41	1	1.269	0.34	0.00384122	105.6	83.3	7.49	13.33	101.3	112.9	94.7	115.3	103	107.5	118.7	103.8	67.6	106.2	87.7	81.2	85.4	87.1	75.5	80.8	1
TGGT1_227850	High	IsMasterProtein	TGGT1_227850-t26_1-p1	transcript=TGGT1_227850-t26_1 | gene=TGGT1_227850 | organism=Toxoplasma_gondii_GT1 | gene_product=Peptidyl-prolyl cis-trans isomerase [Source:UniProtKB/TrEMBL;Acc:S7UXC3] | transcript_product=peptidyl-prolyl cis-trans isomerase, cyclophilin-type domain-containing protein | location=TGGT1_chrX:681324-685057(-) | protein_length=592 | sequence_SO=chromosome | SO=protein_coding_gene | is_pseudo=false	0.001	6.527	4	3	3	3	592	66.2	8.18	4.86	3	1.27	0.34	0.00824807	275.9	217.2	12.99	2.65	238	220	265.7	285.1	305.9	326.7	266.9	302.8	217.4	231.1	215.9	217.1	211.6	221.8	217.5	215.9	1
TGGT1_240490	High	IsMasterProtein	TGGT1_240490-t26_1-p1	transcript=TGGT1_240490-t26_1 | gene=TGGT1_240490 | organism=Toxoplasma_gondii_GT1 | gene_product=hypothetical protein | transcript_product=hypothetical protein | location=TGGT1_chrVI:1265659-1266090(-) | protein_length=143 | sequence_SO=chromosome | SO=protein_coding_gene | is_pseudo=false	0.001	5.263	21	2	3	2	143	15.6	4.96	5.72	2	1.253	0.33	0.254265	26.7	21.3	16.35	13.24	26.4	27.1	27.7	22.6	27.8	22.4	30.5	17.6	21.4	21.2	27.7	25	17.8	21.3	21.2	22.6	1
TGGT1_226720	High	IsMasterProtein	TGGT1_226720-t26_1-p1	transcript=TGGT1_226720-t26_1 | gene=TGGT1_226720 | organism=Toxoplasma_gondii_GT1 | gene_product=Translin family protein [Source:UniProtKB/TrEMBL;Acc:S7UXF7] | transcript_product=translin family protein | location=TGGT1_chrX:1320212-1321887(+) | protein_length=273 | sequence_SO=chromosome | SO=protein_coding_gene | is_pseudo=false	0	9.526	11	3	4	3	273	31.3	6.07	10.64	3	1.256	0.33	3.13059e-06	508.1	404.6	3.39	4.95	482.2	531	493.6	529.9	504.3	511.3	504.9	522.5	367.3	404.4	375.7	395.6	414.8	422.3	417.5	404.7	1
TGGT1_231200	High	IsMasterProtein	TGGT1_231200-t26_1-p1	transcript=TGGT1_231200-t26_1 | gene=TGGT1_231200 | organism=Toxoplasma_gondii_GT1 | gene_product=hypothetical protein | transcript_product=hypothetical protein | location=TGGT1_chrVIII:1309878-1321341(+) | protein_length=2685 | sequence_SO=chromosome | SO=protein_coding_gene | is_pseudo=false	0.005	3.251	1	1	1	1	2685	295.9	6.16	2.2	1	1.256	0.33	0.0692068	24.8	19.7	12.34	19.67	21.7	26.5	27.6	23.3	20.1	23.1	28.6	26.4	20.2	21.9	19.2	18.5	27.3	19.3	13.2	21.4	1
TGGT1_253420	Medium	IsMasterProtein	TGGT1_253420-t26_1-p1	transcript=TGGT1_253420-t26_1 | gene=TGGT1_253420 | organism=Toxoplasma_gondii_GT1 | gene_product=PQ loop repeat-containing protein [Source:UniProtKB/TrEMBL;Acc:S7ULP9] | transcript_product=PQ loop repeat-containing protein | location=TGGT1_chrIII:917043-921464(-) | protein_length=410 | sequence_SO=chromosome | SO=protein_coding_gene | is_pseudo=false	0.043	1.49	1	1	1	1	410	44.6	9.17	2.08	1	1.256	0.33	0.00153359	160.3	127.6	9.83	9.37	152.5	133.7	171.5	149.4	168.5	181.9	171.1	151.9	138.9	130.7	128.6	100.4	126.7	123.3	131.3	116.8	1
TGGT1_267720	High	IsMasterProtein	TGGT1_267720-t26_1-p1	transcript=TGGT1_267720-t26_1 | gene=TGGT1_267720 | organism=Toxoplasma_gondii_GT1 | gene_product=Ion_trans domain-containing protein [Source:UniProtKB/TrEMBL;Acc:S7VVY4] | transcript_product=transporter, cation channel family protein | location=TGGT1_chrIX:245674-256282(+) | protein_length=1356 | sequence_SO=chromosome | SO=protein_coding_gene | is_pseudo=false	0	10.907	4	4	4	4	1356	147.2	7.61	8.98	4	1.26	0.33	3.29506e-05	230.5	182.9	4.88	6.26	245.4	234.1	220.1	238.8	226.9	223.8	246.6	217.1	184.7	179.9	185.3	191.6	169.1	181.1	177.2	208.2	1
TGGT1_291630	High	IsMasterProtein	TGGT1_291630-t26_1-p1	transcript=TGGT1_291630-t26_1 | gene=TGGT1_291630 | organism=Toxoplasma_gondii_GT1 | gene_product=hypothetical protein | transcript_product=hypothetical protein | location=TGGT1_chrIX:4111452-4112159(-) | protein_length=235 | sequence_SO=chromosome | SO=protein_coding_gene | is_pseudo=false	0.001	5.813	12	2	2	2	235	25.7	4.88	5.68	2	1.26	0.33	0.388024	49.8	39.5	21.14	19.55	57.1	55.4	40	54.1	42.2	28.7	45.8	55.3	32.4	53.4	32.8	36.5	42.8	48.8	36	48.2	1
TGGT1_213860	Low	IsMasterProtein	TGGT1_213860-t26_1-p1	transcript=TGGT1_213860-t26_1 | gene=TGGT1_213860 | organism=Toxoplasma_gondii_GT1 | gene_product=hypothetical protein | transcript_product=hypothetical protein | location=TGGT1_chrV:1251436-1255926(+) | protein_length=275 | sequence_SO=chromosome | SO=protein_coding_gene | is_pseudo=false	0.068	1.264	2	1	1	1	275	30.9	8.7	2.27	1	1.261	0.33	0.0096426	343.4	272.3	13.83	7.2	293.9	371.4	275.8	405	314	380.3	317.6	377.8	249	278.4	272.4	270.8	299.5	272.3	238.5	286.8	1
TGGT1_289210	High	IsMasterProtein	TGGT1_289210-t26_1-p1	transcript=TGGT1_289210-t26_1 | gene=TGGT1_289210 | organism=Toxoplasma_gondii_GT1 | gene_product=Prefoldin subunit protein [Source:UniProtKB/TrEMBL;Acc:S7UQQ5] | transcript_product=prefoldin subunit protein | location=TGGT1_chrIX:2890306-2891984(-) | protein_length=330 | sequence_SO=chromosome | SO=protein_coding_gene | is_pseudo=false	0	9.931	9	4	8	4	330	37.9	7.77	17.97	4	1.245	0.32	0.5522	1425.2	1145.1	31.99	30.14	1372.6	1621.8	921.6	1655.6	1004.1	574	1715.8	1479.8	641.4	1573.9	699	1086	1240.4	1207.4	913.9	1424.8	1
TGGT1_304955	High	IsMasterProtein	TGGT1_304955-t26_1-p1	transcript=TGGT1_304955-t26_1 | gene=TGGT1_304955 | organism=Toxoplasma_gondii_GT1 | gene_product=PPM-type phosphatase domain-containing protein [Source:UniProtKB/TrEMBL;Acc:S7VWJ7] | transcript_product=serine/threonine specific protein phosphatase | location=TGGT1_chrIX:4886317-4901581(-) | protein_length=2883 | sequence_SO=chromosome | SO=protein_coding_gene | is_pseudo=false	0	17.875	2	7	10	7	2883	303.5	9.6	21.19	7	1.246	0.32	2.24527e-05	1204.1	966.5	5.45	3.52	1135.1	1250.4	1124.5	1285.9	1127.3	1265.8	1189.2	1219.2	919.6	1024.4	992.8	975.3	998.9	957.8	942.7	949.7	1
TGGT1_248190	High	IsMasterProtein	TGGT1_248190-t26_1-p1	transcript=TGGT1_248190-t26_1 | gene=TGGT1_248190 | organism=Toxoplasma_gondii_GT1 | gene_product=hypothetical protein | transcript_product=hypothetical protein | location=TGGT1_chrXII:3664383-3669489(+) | protein_length=962 | sequence_SO=chromosome | SO=protein_coding_gene | is_pseudo=false	0.009	2.907	1	1	1	1	962	107	7.8	2.71	1	1.248	0.32	0.00280967	69.8	55.9	10.56	8.61	71.1	67.9	80.2	57.5	76.3	68.6	66.2	78.7	50.1	51.6	53.6	63.7	55.7	56.2	56.9	62.7	1
TGGT1_220880	High	IsMasterProtein	TGGT1_220880-t26_1-p1	transcript=TGGT1_220880-t26_1 | gene=TGGT1_220880 | organism=Toxoplasma_gondii_GT1 | gene_product=hypothetical protein | transcript_product=hypothetical protein | location=TGGT1_chrII:19932-22208(+) | protein_length=203 | sequence_SO=chromosome | SO=protein_coding_gene | is_pseudo=false	0.001	6.01	10	2	2	2	203	23.5	5.15	5.34	2	1.251	0.32	0.335904	61	48.8	25.96	21.29	69.1	62.3	59.8	58.1	42.9	25.9	67.2	62.2	35.5	53.9	30.9	53.2	44.7	53.9	37.7	54.6	1
TGGT1_210280	Low	IsMasterProtein	TGGT1_210280-t26_1-p1	transcript=TGGT1_210280-t26_1 | gene=TGGT1_210280 | organism=Toxoplasma_gondii_GT1 | gene_product=Protein kinase domain-containing protein [Source:UniProtKB/TrEMBL;Acc:S7W3W9] | transcript_product=PEK kinase | location=TGGT1_chrIX:4693013-4696614(-) | protein_length=564 | sequence_SO=chromosome | SO=protein_coding_gene | is_pseudo=false	0.069	1.261	2	1	1	1	564	61	8.09	1.73	1	1.252	0.32	0.120392	25.9	20.7	15.6	12.57	27	25.4	27.3	26.4	30.3	18.6	22.6	20.7	25.1	17.2	19.7	24.4	19.5	22	21.5	19.9	1
TGGT1_244260	High	IsMasterProtein	TGGT1_244260-t26_1-p1	transcript=TGGT1_244260-t26_1 | gene=TGGT1_244260 | organism=Toxoplasma_gondii_GT1 | gene_product=hypothetical protein | transcript_product=hypothetical protein | location=TGGT1_chrVI:3058707-3059210(+) | protein_length=167 | sequence_SO=chromosome | SO=protein_coding_gene | is_pseudo=false	0.003	3.994	8	1	2	1	167	18.9	7.4	4.02	1	1.237	0.31	0.0321136	45.2	36.6	14.57	10.16	38.7	54.8	38.9	46.7	43.8	38.4	47.3	53.9	36.3	38.1	35.9	45.1	33.6	40	33.3	36.9	1
TGGT1_288920	High	IsMasterProtein	TGGT1_288920-t26_1-p1	transcript=TGGT1_288920-t26_1 | gene=TGGT1_288920 | organism=Toxoplasma_gondii_GT1 | gene_product=ABC transporter domain-containing protein [Source:UniProtKB/TrEMBL;Acc:S7UPK5] | transcript_product=ATP-binding cassette G family transporter ABCG96 | location=TGGT1_chrIX:2617553-2623855(-) | protein_length=1045 | sequence_SO=chromosome | SO=protein_coding_gene | is_pseudo=false	0.001	6.445	2	2	2	2	1045	112.4	6.15	3.1	2	1.237	0.31	0.0907349	107.1	86.5	12.46	12.88	124.2	115.4	108.5	91	89.4	105.6	89.6	109	117.2	84.1	84.6	86.5	79.7	91	94.4	86.5	1
TGGT1_232650	High	IsMasterProtein	TGGT1_232650-t26_1-p1	transcript=TGGT1_232650-t26_1 | gene=TGGT1_232650 | organism=Toxoplasma_gondii_GT1 | gene_product=ELM2 domain-containing protein [Source:UniProtKB/TrEMBL;Acc:S7V2V1] | transcript_product=hypothetical protein | location=TGGT1_chrVIII:2201161-2202939(-) | protein_length=442 | sequence_SO=chromosome | SO=protein_coding_gene | is_pseudo=false	0.003	4.002	4	1	1	1	442	48.2	8.69	3.61	1	1.238	0.31	0.107614	27.8	22.4	11.28	17.68	27.9	20.5	29.7	29.3	25.5	26.6	29.6	27.7	20.2	23	22.5	23.7	22.2	19.7	33	22.3	1
TGGT1_308950	High	IsMasterProtein	TGGT1_308950-t26_1-p1	transcript=TGGT1_308950-t26_1 | gene=TGGT1_308950 | organism=Toxoplasma_gondii_GT1 | gene_product=Histidine acid phosphatase superfamily protein [Source:UniProtKB/TrEMBL;Acc:S7W0Z6] | transcript_product=histidine acid phosphatase superfamily protein | location=TGGT1_chrXI:345630-347426(+) | protein_length=598 | sequence_SO=chromosome | SO=protein_coding_gene | is_pseudo=false	0	29.657	15	9	11	9	598	66.2	7.68	30.71	9	1.239	0.31	6.38729e-07	2009.3	1622.2	1.35	3.12	2034.7	2008.7	2009.9	1994.4	1970	2062.3	2004.2	2013.2	1620.6	1649.3	1639.2	1605.2	1623.9	1552.7	1678.9	1526.7	1
TGGT1_223000	High	IsMasterProtein	TGGT1_223000-t26_1-p1	transcript=TGGT1_223000-t26_1 | gene=TGGT1_223000 | organism=Toxoplasma_gondii_GT1 | gene_product=Dynein light chain [Source:UniProtKB/TrEMBL;Acc:S7UL29] | transcript_product=dynein light chain DLC | location=TGGT1_chrII:1350278-1351342(+) | protein_length=138 | sequence_SO=chromosome | SO=protein_coding_gene | is_pseudo=false	0.004	3.705	9	2	3	2	138	16	8.46	7.36	2	1.24	0.31	0.286457	518.7	418.2	34.77	5.51	365.2	730.7	381	706.1	357.9	708.3	362.5	731.9	394.4	425.2	407.5	455.6	411.2	428.5	401.5	455.2	1
TGGT1_225190	Medium	IsMasterProtein	TGGT1_225190-t26_1-p1	transcript=TGGT1_225190-t26_1 | gene=TGGT1_225190 | organism=Toxoplasma_gondii_GT1 | gene_product=hypothetical protein | transcript_product=hypothetical protein | location=TGGT1_chrX:2344684-2350682(+) | protein_length=1077 | sequence_SO=chromosome | SO=protein_coding_gene | is_pseudo=false	0.029	1.708	1	1	1	1	1077	116.2	7.74	1.61	1	1.24	0.31	0.236181	11.6	9.4	23.52	14.49	10.1	11.3	12.4	12	6.8	15.4	9	13	9.5	9.7	11.3	7.6	9.2	8.5	7.9	11.1	1
TGGT1_216540	High	IsMasterProtein	TGGT1_216540-t26_1-p1	transcript=TGGT1_216540-t26_1 | gene=TGGT1_216540 | organism=Toxoplasma_gondii_GT1 | gene_product=Dolichyl-phosphate beta-glucosyltransferase [Source:UniProtKB/TrEMBL;Acc:S7UKX8] | transcript_product=dolichyl-phosphate beta-glucosyltransferase | location=TGGT1_chrXI:6008082-6011078(+) | protein_length=689 | sequence_SO=chromosome | SO=protein_coding_gene | is_pseudo=false	0	12.144	7	3	4	3	689	74.3	6.76	10.29	3	1.241	0.31	0.0266935	45.8	36.9	8.21	14.88	50	46.7	51	46.8	42.2	40.4	44.9	43	42.6	47.1	30.7	36.7	30.8	40.8	36.4	37.1	1
TGGT1_249200	High	IsMasterProtein	TGGT1_249200-t26_1-p1	transcript=TGGT1_249200-t26_1 | gene=TGGT1_249200 | organism=Toxoplasma_gondii_GT1 | gene_product=Copper transporter [Source:UniProtKB/TrEMBL;Acc:S7W925] | transcript_product=Ctr copper transporter family protein | location=TGGT1_chrXII:4304718-4305425(+) | protein_length=235 | sequence_SO=chromosome | SO=protein_coding_gene | is_pseudo=false	0.005	3.429	4	1	1	1	235	25.6	8.29	3.4	1	1.243	0.31	0.0395644	77	62	14.42	6.11	81.9	62.6	80.5	74.1	91.7	58.7	80.1	70.8	57.7	61.1	62.8	61.2	68.7	67.5	63	59	1
TGGT1_248710	High	IsMasterProtein	TGGT1_248710-t26_1-p1	transcript=TGGT1_248710-t26_1 | gene=TGGT1_248710 | organism=Toxoplasma_gondii_GT1 | gene_product=UCH domain-containing protein [Source:UniProtKB/TrEMBL;Acc:S7W9E4] | transcript_product=hypothetical protein | location=TGGT1_chrXII:4038425-4043891(+) | protein_length=1004 | sequence_SO=chromosome | SO=protein_coding_gene | is_pseudo=false	0.003	3.872	1	1	1	1	1004	109.7	7.97	3.56	1	1.244	0.31	0.000844766	52.4	42.2	10.69	7.44	51.6	53.3	51	53.4	61.8	51.1	45.3	62.4	42.7	44.6	42.3	36	44.8	42	38.5	39.4	1
TGGT1_271610	High	IsMasterProtein	TGGT1_271610-t26_1-p1	transcript=TGGT1_271610-t26_1 | gene=TGGT1_271610 | organism=Toxoplasma_gondii_GT1 | gene_product=Pyrroline-5-carboxylate reductase [Source:UniProtKB/TrEMBL;Acc:S7V4N7] | transcript_product=pyrroline-5-carboxylate reductase | location=TGGT1_chrVIII:4443685-4446486(-) | protein_length=375 | sequence_SO=chromosome | SO=protein_coding_gene | is_pseudo=false	0	10.517	11	3	4	3	375	40.7	8.63	7.9	3	1.228	0.3	0.000154508	397.4	323.6	6.95	4.6	381.7	420.3	384.2	445.7	360.2	425.5	389.3	405.6	311.3	320.5	336.3	351.9	305.2	326.6	314.8	326.9	1
TGGT1_209080	High	IsMasterProtein	TGGT1_209080-t26_1-p1	transcript=TGGT1_209080-t26_1 | gene=TGGT1_209080 | organism=Toxoplasma_gondii_GT1 | gene_product=Transport protein particle (Trapp) component, bet3 protein [Source:UniProtKB/TrEMBL;Acc:S7UIM4] | transcript_product=transport protein particle (trapp) component, bet3 protein | location=TGGT1_chrIb:1048536-1049201(-) | protein_length=221 | sequence_SO=chromosome | SO=protein_coding_gene | is_pseudo=…	0.001	7.666	10	2	3	2	221	23.8	8.6	11.77	2	1.229	0.3	0.0211228	122.1	99.4	14.98	9.62	154.6	103.1	142.6	119.2	125.1	119.1	140.1	102.1	119.8	96.3	102.5	105.2	107.9	90.4	95.3	92.2	1
TGGT1_222710	High	IsMasterProtein	TGGT1_222710-t26_1-p1	transcript=TGGT1_222710-t26_1 | gene=TGGT1_222710 | organism=Toxoplasma_gondii_GT1 | gene_product=Putative IMP-specific 5'-nucleotidase 1 [Source:UniProtKB/TrEMBL;Acc:S7UL12] | transcript_product=putative IMP-specific 5'-nucleotidase 1 | location=TGGT1_chrII:1186528-1192383(+) | protein_length=683 | sequence_SO=chromosome | SO=protein_coding_gene | is_pseudo=false	0	15.171	9	5	7	5	683	72.9	6.13	16.88	5	1.229	0.3	0.00226458	263.2	214.2	9.01	1.8	296.3	248	267.5	257.9	285.7	259.1	289.8	224.6	213.7	214	222.6	212.2	211.5	214.3	218.5	219.1	1
TGGT1_311250	High	IsMasterProtein	TGGT1_311250-t26_1-p1	transcript=TGGT1_311250-t26_1 | gene=TGGT1_311250 | organism=Toxoplasma_gondii_GT1 | gene_product=BTB domain-containing protein [Source:UniProtKB/TrEMBL;Acc:S7UTR3] | transcript_product=hypothetical protein | location=TGGT1_chrXI:1874376-1883214(+) | protein_length=1848 | sequence_SO=chromosome | SO=protein_coding_gene | is_pseudo=false	0.001	6.717	2	3	3	3	1848	201.2	5.92	3.13	3	1.23	0.3	0.000564671	108.1	87.9	6.72	5.21	105.9	113.5	110.9	102.2	118.2	105.8	94.7	110.4	87.3	97.7	88.4	93	84.2	95	87.5	86.7	1
TGGT1_233200	Medium	IsMasterProtein	TGGT1_233200-t26_1-p1	transcript=TGGT1_233200-t26_1 | gene=TGGT1_233200 | organism=Toxoplasma_gondii_GT1 | gene_product=Ubiquitin-related modifier 1 [Source:UniProtKB/TrEMBL;Acc:S7V323] | transcript_product=ubiquitin related modifier protein | location=TGGT1_chrVIII:2490651-2491175(-) | protein_length=174 | sequence_SO=chromosome | SO=protein_coding_gene | is_pseudo=false	0.013	2.535	4	1	1	1	174	18.6	4.68	2.29	1	1.232	0.3	0.00740848	59.7	48.4	15.46	13.73	59.8	58.6	66.9	54.7	83.9	59.5	64.2	53.4	51.5	54	52.5	40.7	46.2	35.1	50.2	46.7	1
TGGT1_270780	High	IsMasterProtein	TGGT1_270780-t26_1-p1	transcript=TGGT1_270780-t26_1 | gene=TGGT1_270780 | organism=Toxoplasma_gondii_GT1 | gene_product=DNA-directed RNA polymerase II RPB6 [Source:UniProtKB/TrEMBL;Acc:A0A125YFP3] | transcript_product=DNA-directed RNA polymerase II RPB6 | location=TGGT1_chrVIII:4994703-4995494(+) | protein_length=146 | sequence_SO=chromosome | SO=protein_coding_gene | is_pseudo=false	0.001	5.712	21	2	2	2	146	16.2	4.44	5.7	2	1.233	0.3	0.981879	9.9	8	32.49	27.94	9.2	11.1	11.8	6.2	7.4	3.6	11.1	10.6	5.7	7.6	8.4	10.8	7.3	13.6	8.2	7.8	1
TGGT1_310060	High	IsMasterProtein	TGGT1_310060-t26_1-p1	transcript=TGGT1_310060-t26_1 | gene=TGGT1_310060 | organism=Toxoplasma_gondii_GT1 | gene_product=Exonuclease domain-containing protein [Source:UniProtKB/TrEMBL;Acc:S7W7Y6] | transcript_product=small nuclease | location=TGGT1_chrXI:998254-999357(+) | protein_length=367 | sequence_SO=chromosome | SO=protein_coding_gene | is_pseudo=false	0	16.663	12	4	7	4	367	41.3	7.58	23.4	4	1.233	0.3	1.20118e-06	526	426.6	3.68	3.19	554.6	530.2	525.9	530.8	517.1	526	495.8	496.7	430.8	413.3	411.7	421.6	448.9	434.5	422.4	444.3	1
TGGT1_226420	High	IsMasterProtein	TGGT1_226420-t26_1-p1	transcript=TGGT1_226420-t26_1 | gene=TGGT1_226420 | organism=Toxoplasma_gondii_GT1 | gene_product=Peptidase family M3 protein [Source:UniProtKB/TrEMBL;Acc:S7W5N6] | transcript_product=peptidase family M3 protein | location=TGGT1_chrX:1555855-1562891(+) | protein_length=667 | sequence_SO=chromosome | SO=protein_coding_gene | is_pseudo=false	0	23.26	11	8	13	8	667	75.4	6.98	26.72	8	1.234	0.3	2.89602e-05	1263.8	1024	4.53	4.37	1248.4	1279.5	1207.1	1305.3	1157.6	1287.9	1177.8	1290	1103.3	1036.8	990.3	1090.3	987.9	1011.4	1010.5	1072.1	1
TGGT1_315300	High	IsMasterProtein	TGGT1_315300-t26_1-p1	transcript=TGGT1_315300-t26_1 | gene=TGGT1_315300 | organism=Toxoplasma_gondii_GT1 | gene_product=DUF667 domain-containing protein [Source:UniProtKB/TrEMBL;Acc:A0A125YSW5] | transcript_product=putative transcription factor IIB | location=TGGT1_chrXI:4583866-4586373(-) | protein_length=191 | sequence_SO=chromosome | SO=protein_coding_gene | is_pseudo=false	0.001	6.347	11	2	2	2	191	22.5	9.33	5.14	2	1.235	0.3	0.0318958	69.7	56.5	17.59	10.27	69.6	57.2	62.7	79.8	91.3	56	81.5	69.9	63.4	51.7	55	63.9	59.5	49.5	58	49.7	1
TGGT1_320130	Medium	IsMasterProtein	TGGT1_320130-t26_1-p1	transcript=TGGT1_320130-t26_1 | gene=TGGT1_320130 | organism=Toxoplasma_gondii_GT1 | gene_product=XRN2-binding (XTBD) domain-containing protein [Source:UniProtKB/TrEMBL;Acc:S7UK23] | transcript_product=hypothetical protein | location=TGGT1_chrIV:423915-425904(-) | protein_length=239 | sequence_SO=chromosome | SO=protein_coding_gene | is_pseudo=false	0.016	2.24	3	1	1	1	239	25.2	5.14	3.26	1	1.235	0.3	0.216972	189.7	153.6	16.95	19.29	186.2	198.4	151.8	198.7	153.3	121	201.5	193.3	100.8	189.8	130.2	156.9	160.4	150.4	129.5	179.4	1
TGGT1_306900	Low	IsMasterProtein	TGGT1_306900-t26_1-p1	transcript=TGGT1_306900-t26_1 | gene=TGGT1_306900 | organism=Toxoplasma_gondii_GT1 | gene_product=NOL1/NOP2/sun family protein [Source:UniProtKB/TrEMBL;Acc:S7US02] | transcript_product=NOL1/NOP2/sun family protein | location=TGGT1_chrXI:183026-185159(+) | protein_length=613 | sequence_SO=chromosome | SO=protein_coding_gene | is_pseudo=false	0.061	1.315	1	1	1	1	613	66.5	7.14	1.68	1	1.219	0.29	0.120544	28.2	23.1	12.48	14.1	29	28.9	29.2	27.5	23.2	26	29.9	20.5	27.1	24.3	21.7	19.6	25.7	18.3	26.7	22	1
TGGT1_201840	High	IsMasterProtein	TGGT1_201840-t26_1-p1	transcript=TGGT1_201840-t26_1 | gene=TGGT1_201840 | organism=Toxoplasma_gondii_GT1 | gene_product=Peptidase A1 domain-containing protein [Source:UniProtKB/TrEMBL;Acc:S7UV48] | transcript_product=aspartyl protease ASP1 | location=TGGT1_chrVIIa:3648103-3654235(+) | protein_length=619 | sequence_SO=chromosome | SO=protein_coding_gene | is_pseudo=false	0	12.349	7	4	5	4	619	66.9	6.62	12.56	4	1.22	0.29	0.00559451	338.6	277.5	10.25	4.24	347	386.5	291.9	379.2	298	315.5	338.4	338.8	264	293.5	279	289	276	294.2	265.4	273.7	1
TGGT1_260520	High	IsMasterProtein	TGGT1_260520-t26_1-p1	transcript=TGGT1_260520-t26_1 | gene=TGGT1_260520 | organism=Toxoplasma_gondii_GT1 | gene_product=hypothetical protein | transcript_product=hypothetical protein | location=TGGT1_chrVIIb:2164696-2167131(-) | protein_length=742 | sequence_SO=chromosome | SO=protein_coding_gene | is_pseudo=false	0	58.866	27	15	26	15	742	77	7.71	82.29	15	1.22	0.29	8.4458e-05	2383.7	1954	5.93	3.78	2240	2610.6	2304.2	2466	2228.2	2502.5	2282.8	2467	1892.6	1971.8	1936.3	2090.8	1900.9	2021.7	1873.6	1997.4	1	Methylthio [C362]
TGGT1_283780	High	IsMasterProtein	TGGT1_283780-t26_1-p1	transcript=TGGT1_283780-t26_1 | gene=TGGT1_283780 | organism=Toxoplasma_gondii_GT1 | gene_product=Glucose-6-phosphate isomerase [Source:UniProtKB/TrEMBL;Acc:S7W2U8] | transcript_product=glucose-6-phosphate isomerase GPI | location=TGGT1_chrV:2809762-2819876(-) | protein_length=661 | sequence_SO=chromosome | SO=protein_coding_gene | is_pseudo=false	0	71.031	28	19	42	19	661	74.4	8.46	117.86	19	1.221	0.29	1.16954e-09	4634	3795.8	1.41	1.75	4621.2	4646.8	4503.9	4603.4	4540.8	4683.3	4659.1	4680.1	3671.6	3845.2	3780.1	3788.1	3899.7	3800.8	3790.8	3844.6	1
TGGT1_301200	Low	IsMasterProtein	TGGT1_301200-t26_1-p1	transcript=TGGT1_301200-t26_1 | gene=TGGT1_301200 | organism=Toxoplasma_gondii_GT1 | gene_product=hypothetical protein | transcript_product=hypothetical protein | location=TGGT1_chrIV:2190458-2192241(-) | protein_length=341 | sequence_SO=chromosome | SO=protein_coding_gene | is_pseudo=false	0.081	1.176	2	1	1	1	341	38.1	9.41	1.79	1	1.221	0.29	0.172027	69.5	56.9	17.61	20.31	66	75.5	53.7	85.2	56.3	65.5	73.2	87.8	47.1	69.9	47.5	71.9	49.2	73.4	48.9	65.9	1
TGGT1_236240	High	IsMasterProtein	TGGT1_236240-t26_1-p1	transcript=TGGT1_236240-t26_1 | gene=TGGT1_236240 | organism=Toxoplasma_gondii_GT1 | gene_product=Protein kinase domain-containing protein [Source:UniProtKB/TrEMBL;Acc:S7URI6] | transcript_product=Tyrosine kinase-like (TKL) protein | location=TGGT1_chrX:5234649-5239604(+) | protein_length=783 | sequence_SO=chromosome | SO=protein_coding_gene | is_pseudo=false	0.001	6.219	3	2	2	2	783	85	5.81	5.52	2	1.222	0.29	0.189359	42.4	34.7	26.07	11.92	47.1	37.1	66.8	32.7	51.2	32.8	47	38.2	36.6	31.9	45.1	33.7	33.7	33.4	35.6	39.6	1
TGGT1_203960	High	IsMasterProtein	TGGT1_203960-t26_1-p1	transcript=TGGT1_203960-t26_1 | gene=TGGT1_203960 | organism=Toxoplasma_gondii_GT1 | gene_product=hypothetical protein | transcript_product=hypothetical protein | location=TGGT1_chrVIIa:1987603-1993421(-) | protein_length=808 | sequence_SO=chromosome | SO=protein_coding_gene | is_pseudo=false	0	15.945	9	4	4	4	808	90.6	6.21	17.95	4	1.223	0.29	0.00482437	105.5	86.3	4.46	10.76	105.6	114.1	102	101.7	102.7	105.3	112.7	107.6	84.7	87.8	82	102.8	78.4	75.7	96.9	93.8	1
TGGT1_215440	Medium	IsMasterProtein	TGGT1_215440-t26_1-p1	transcript=TGGT1_215440-t26_1 | gene=TGGT1_215440 | organism=Toxoplasma_gondii_GT1 | gene_product=WWE domain-containing protein [Source:UniProtKB/TrEMBL;Acc:A0A125YWF9] | transcript_product=WWE domain-containing protein | location=TGGT1_chrX:6850332-6855642(-) | protein_length=756 | sequence_SO=chromosome | SO=protein_coding_gene | is_pseudo=false	0.021	1.926	1	1	1	1	756	81.4	7.74	1.65	1	1.223	0.29	0.32512	11.1	9.1	28.66	19.64	11.5	7.2	10.8	15.1	15.5	9.4	15.7	8.5	12	8.8	9.2	9	13.3	8.5	7.7	9.3	1
TGGT1_258230	High	IsMasterProtein	TGGT1_258230-t26_1-p1	transcript=TGGT1_258230-t26_1 | gene=TGGT1_258230 | organism=Toxoplasma_gondii_GT1 | gene_product=Protein kinase domain-containing protein [Source:UniProtKB/TrEMBL;Acc:S7WET0] | transcript_product=rhoptry kinase family protein ROP20 | location=TGGT1_chrVIIb:3456955-3458613(-) | protein_length=552 | sequence_SO=chromosome | SO=protein_coding_gene | is_pseudo=false	0	29.936	17	9	14	9	552	61	8.18	30.58	9	1.223	0.29	2.98375e-07	1090.7	891.9	2.46	3.22	1101.9	1097.4	1089.6	1091.8	1032.5	1119.6	1064.5	1074	947.9	862.7	861.7	901.6	885.1	898.7	908.1	870.9	1
TGGT1_263570	High	IsMasterProtein	TGGT1_263570-t26_1-p1	transcript=TGGT1_263570-t26_1 | gene=TGGT1_263570 | organism=Toxoplasma_gondii_GT1 | gene_product=hypothetical protein | transcript_product=hypothetical protein | location=TGGT1_chrVIIb:443920-449327(-) | protein_length=394 | sequence_SO=chromosome | SO=protein_coding_gene | is_pseudo=false	0	11.963	9	5	5	5	394	46.2	8.43	7.07	5	1.223	0.29	4.49071e-05	273.8	224	5.46	4.97	294.4	260.2	292.3	259.3	273.3	274.4	281.5	255.3	232	216.8	222.5	240.9	206.8	213.4	231.3	225.4	1
TGGT1_293810	High	IsMasterProtein	TGGT1_293810-t26_1-p1	transcript=TGGT1_293810-t26_1 | gene=TGGT1_293810 | organism=Toxoplasma_gondii_GT1 | gene_product=Carboxyvinyl-carboxyphosphonate phosphorylmutase [Source:UniProtKB/TrEMBL;Acc:A0A125YZ37] | transcript_product=carboxyvinyl-carboxyphosphonate phosphorylmutase | location=TGGT1_chrIa:554198-558289(+) | protein_length=369 | sequence_SO=chromosome | SO=protein_coding_gene | is_pseudo=false	0	16.186	13	4	10	4	369	39.9	6.14	28.05	4	1.223	0.29	2.4705e-06	555.7	454.5	3.15	1.21	539.7	530.7	553.6	560.2	532.1	574.7	557.9	574.5	453.2	449.6	455.2	455.5	464.1	447.7	461.4	453.8	1
TGGT1_232760	High	IsMasterProtein	TGGT1_232760-t26_1-p1	transcript=TGGT1_232760-t26_1 | gene=TGGT1_232760 | organism=Toxoplasma_gondii_GT1 | gene_product=Protein phosphatase inhibitor IPP2 [Source:UniProtKB/TrEMBL;Acc:A0A125YXL4] | transcript_product=protein phosphatase inhibitor IPP2 | location=TGGT1_chrVIII:2246948-2248139(+) | protein_length=145 | sequence_SO=chromosome | SO=protein_coding_gene | is_pseudo=false	0	14.808	38	5	6	5	145	16.6	5.71	17.41	5	1.224	0.29	0.357491	379.5	310.1	24.43	32.35	407.8	387.9	361.7	376.9	367	145.1	413.3	382.2	157	367.6	189.8	291.4	330	375.2	199.6	389.2	1
TGGT1_235905	Medium	IsMasterProtein	TGGT1_235905-t26_1-p1	transcript=TGGT1_235905-t26_1 | gene=TGGT1_235905 | organism=Toxoplasma_gondii_GT1 | gene_product=Lactamase_B domain-containing protein [Source:UniProtKB/TrEMBL;Acc:S7URN7] | transcript_product=putative ribonuclease z | location=TGGT1_chrX:5011602-5024262(+) | protein_length=1077 | sequence_SO=chromosome | SO=protein_coding_gene | is_pseudo=false	0.013	2.456	1	1	1	1	1077	116.7	6.62	2.04	1	1.224	0.29	0.120676	40	32.7	13.26	11.56	31.3	42.1	41.8	33.1	43.1	38.2	44.4	33.9	31.5	31.5	33.1	36.6	32.2	39	27.3	37.7	1
TGGT1_295360	High	IsMasterProtein	TGGT1_295360-t26_1-p1	transcript=TGGT1_295360-t26_1 | gene=TGGT1_295360 | organism=Toxoplasma_gondii_GT1 | gene_product=hypothetical protein | transcript_product=hypothetical protein | location=TGGT1_chrIa:1791407-1792949(+) | protein_length=268 | sequence_SO=chromosome | SO=protein_coding_gene | is_pseudo=false	0	40.314	36	10	30	10	268	29.5	7.08	79.09	10	1.224	0.29	9.86756e-06	4074.1	3329.3	1.93	4.28	4180.6	4087.7	4049.6	4106.1	4079.6	4068.5	3939.1	3957.7	3074.3	3237.7	3323.3	3335.2	3450.9	3364.1	3195.4	3518	1
TGGT1_245560	High	IsMasterProtein	TGGT1_245560-t26_1-p1	transcript=TGGT1_245560-t26_1 | gene=TGGT1_245560 | organism=Toxoplasma_gondii_GT1 | gene_product=hypothetical protein | transcript_product=hypothetical protein | location=TGGT1_chrXII:2306830-2317367(+) | protein_length=1998 | sequence_SO=chromosome | SO=protein_coding_gene | is_pseudo=false	0	61.64	13	18	20	18	1998	207.5	8.07	59.43	18	1.225	0.29	1.80161e-07	1140.2	931.2	2.41	3.11	1167.5	1123.3	1154.7	1125.8	1181.9	1107.1	1156.7	1112.7	905.6	919	927.9	946.6	934.4	905.2	993.4	952.7	1
TGGT1_255400	High	IsMasterProtein	TGGT1_255400-t26_1-p1	transcript=TGGT1_255400-t26_1 | gene=TGGT1_255400 | organism=Toxoplasma_gondii_GT1 | gene_product=hypothetical protein | transcript_product=hypothetical protein | location=TGGT1_chrVIIb:4755383-4757591(+) | protein_length=311 | sequence_SO=chromosome | SO=protein_coding_gene | is_pseudo=false	0.003	3.74	3	1	1	1	311	32.9	9.14	4.09	1	1.225	0.29	3.87254e-05	143.4	117.1	4.41	5.44	146.6	140.9	141.4	140	159.3	144.6	149.6	142.3	118.6	124	131.6	113.3	115.6	115.6	114.2	125.3	1
TGGT1_278160	High	IsMasterProtein	TGGT1_278160-t26_1-p1	transcript=TGGT1_278160-t26_1 | gene=TGGT1_278160 | organism=Toxoplasma_gondii_GT1 | gene_product=V-SNARE domain-containing protein [Source:UniProtKB/TrEMBL;Acc:S7V085] | transcript_product=vesicle transport v-snare protein | location=TGGT1_chrXII:6177033-6179296(+) | protein_length=263 | sequence_SO=chromosome | SO=protein_coding_gene | is_pseudo=false	0.006	3.161	4	1	1	1	263	29.5	7.97	2.22	1	1.225	0.29	0.143813	32.1	26.2	16.75	15.85	18.1	31.9	33.2	32.3	31.9	30.4	32.9	33.4	27	28.7	20.7	25.4	29	20.1	21.2	29.6	1
TGGT1_220390	High	IsMasterProtein	TGGT1_220390-t26_1-p1	transcript=TGGT1_220390-t26_1 | gene=TGGT1_220390 | organism=Toxoplasma_gondii_GT1 | gene_product=hypothetical protein | transcript_product=hypothetical protein | location=TGGT1_chrV:248814-251802(+) | protein_length=274 | sequence_SO=chromosome | SO=protein_coding_gene | is_pseudo=false	0.001	7.531	9	2	3	2	274	29.2	8.72	10.65	2	1.227	0.29	0.00118254	296.5	241.7	7.47	9.51	290.3	276.8	336.7	287.1	335.1	305.7	302.8	285.4	253.7	248.8	267.2	220.1	224.4	209.7	273.4	234.8	1
TGGT1_281545	Medium	IsMasterProtein	TGGT1_281545-t26_1-p1	transcript=TGGT1_281545-t26_1 | gene=TGGT1_281545 | organism=Toxoplasma_gondii_GT1 | gene_product=Eukaryotic initiation factor 3, gamma subunit protein [Source:UniProtKB/TrEMBL;Acc:S7UVN0] | transcript_product=eukaryotic initiation factor 3, gamma subunit protein | location=TGGT1_chrVIIa:4079558-4086388(+) | protein_length=585 | sequence_SO=chromosome | SO=protein_coding_gene | is_pseudo=false	0.016	2.204	2	1	1	1	585	63.4	7.68	2.1	1	1.227	0.29	0.254655	19.2	15.6	3.7	21.42	20.3	19.1	19.5	19.3	19	18.2	18.1	19.2	19.8	15.1	23.4	15.7	12	15.6	20.4	15.6	1
TGGT1_224590	High	IsMasterProtein	TGGT1_224590-t26_1-p1	transcript=TGGT1_224590-t26_1 | gene=TGGT1_224590 | organism=Toxoplasma_gondii_GT1 | gene_product=DNA-directed RNA polymerase III POLR3C [Source:UniProtKB/TrEMBL;Acc:S7UWK9] | transcript_product=DNA-directed RNA polymerase III POLR3C | location=TGGT1_chrX:2861579-2869181(+) | protein_length=823 | sequence_SO=chromosome | SO=protein_coding_gene | is_pseudo=false	0.001	6.817	4	3	3	3	823	88.6	8.41	3.9	3	1.21	0.28	0.104862	59.4	49.1	13.79	14.29	69.8	62.8	59.1	66.8	49.7	47.8	51.8	59.8	49.9	51	49.7	48.1	43.1	45.5	67	48.5	1
TGGT1_255370	Medium	IsMasterProtein	TGGT1_255370-t26_1-p1	transcript=TGGT1_255370-t26_1 | gene=TGGT1_255370 | organism=Toxoplasma_gondii_GT1 | gene_product=TIC20 protein [Source:UniProtKB/TrEMBL;Acc:A0A125YID1] | transcript_product=TIC20 protein | location=TGGT1_chrVIIb:4780385-4782003(-) | protein_length=390 | sequence_SO=chromosome | SO=protein_coding_gene | is_pseudo=false	0.026	1.751	3	1	1	1	390	43.4	9.82	1.67	1	1.21	0.28	0.275607	20.1	16.6	17.1	17.88	21.7	15.9	18.7	22.5	17.7	14.9	22.9	23.6	14.3	14.4	19.9	22.7	19.7	14.5	16.2	17.2	1
TGGT1_285980B	High	IsMasterProtein	TGGT1_285980B-t26_1-p1	transcript=TGGT1_285980B-t26_1 | gene=TGGT1_285980B | organism=Toxoplasma_gondii_GT1 | gene_product=PGM_PMM_III domain-containing protein [Source:UniProtKB/TrEMBL;Acc:S7UP20] | transcript_product=glucosephosphate-mutase GPM1 | location=TGGT1_chrV:1943610-1946285(-) | protein_length=307 | sequence_SO=chromosome | SO=protein_coding_gene | is_pseudo=false	0	62.685	48	15	46	14	307	34.5	5.39	122.38	15	1.21	0.28	8.8904e-09	5992.5	4952.4	2.06	1.89	5927.2	6088.5	5876.2	6058.6	5791.1	6093.1	5880.7	6107.8	4925.9	5135.1	5010.2	5076.6	4885.3	4913	4871.8	4979.1	1
TGGT1_203600	High	IsMasterProtein	TGGT1_203600-t26_1-p1	transcript=TGGT1_203600-t26_1 | gene=TGGT1_203600 | organism=Toxoplasma_gondii_GT1 | gene_product=hypothetical protein | transcript_product=hypothetical protein | location=TGGT1_chrVIIa:2307958-2309277(-) | protein_length=439 | sequence_SO=chromosome | SO=protein_coding_gene | is_pseudo=false	0	13.425	9	3	4	3	439	47.3	8.25	15.68	3	1.211	0.28	0.0061425	400.1	330.3	9.75	3.13	378.6	438.3	345.5	434.5	367.7	432.4	356.7	422.8	321.2	339.5	331.2	338.2	323.2	329.4	350.8	321.8	1
TGGT1_289630	High	IsMasterProtein	TGGT1_289630-t26_1-p1	transcript=TGGT1_289630-t26_1 | gene=TGGT1_289630 | organism=Toxoplasma_gondii_GT1 | gene_product=Microneme protein MIC16 [Source:UniProtKB/TrEMBL;Acc:A0A125YI60] | transcript_product=microneme protein MIC16 | location=TGGT1_chrIX:3165947-3170340(+) | protein_length=668 | sequence_SO=chromosome | SO=protein_coding_gene | is_pseudo=false	0.001	5.459	3	2	2	2	668	74.5	7.58	4.04	2	1.211	0.28	0.00108898	267.8	221.2	6.83	3.98	247.4	270.6	270.3	263.2	220.3	265.7	270.7	269.9	226.3	224.4	203.1	209.5	224.2	227.7	216.8	218.3	1
TGGT1_231430	High	IsMasterProtein	TGGT1_231430-t26_1-p1	transcript=TGGT1_231430-t26_1 | gene=TGGT1_231430 | organism=Toxoplasma_gondii_GT1 | gene_product=Putative oligosaccharyl transferase stt3 protein [Source:UniProtKB/TrEMBL;Acc:S7WBT5] | transcript_product=putative oligosaccharyl transferase stt3 protein | location=TGGT1_chrVIII:1410150-1416446(-) | protein_length=753 | sequence_SO=chromosome | SO=protein_coding_gene | is_pseudo=false	0.001	6.482	3	3	3	3	753	84	9.09	6.17	3	1.212	0.28	0.0171748	377.4	311.4	12.89	5.29	412	323	417.9	324.2	439	341.7	421.3	345.7	307.6	331	314.5	308.3	336.4	286.2	317.6	297.3	1
TGGT1_234380	High	IsMasterProtein	TGGT1_234380-t26_1-p1	transcript=TGGT1_234380-t26_1 | gene=TGGT1_234380 | organism=Toxoplasma_gondii_GT1 | gene_product=hypothetical protein | transcript_product=hypothetical protein | location=TGGT1_chrX:4225477-4226948(+) | protein_length=347 | sequence_SO=chromosome | SO=protein_coding_gene | is_pseudo=false	0	62.146	40	15	34	15	347	38.6	7.12	113.45	15	1.212	0.28	7.86485e-08	5343.6	4407.8	2.57	1.74	5399.9	5140	5482.9	5240.6	5465.6	5287.8	5439.6	5165.6	4433.3	4368.5	4515.8	4382.4	4459.1	4340.6	4433.8	4270.1	1
TGGT1_217555	High	IsMasterProtein	TGGT1_217555-t26_1-p1	transcript=TGGT1_217555-t26_1 | gene=TGGT1_217555 | organism=Toxoplasma_gondii_GT1 | gene_product=hypothetical protein | transcript_product=hypothetical protein | location=TGGT1_chrXII:1846906-1848251(+) | protein_length=108 | sequence_SO=chromosome | SO=protein_coding_gene | is_pseudo=false	0	8.74	35	3	6	3	108	11.6	8.29	22.78	3	1.213	0.28	0.322621	262.9	216.7	18.02	25.41	302.6	244.9	233.5	266.2	269.8	151.9	280.2	259.7	112.3	275.2	179.9	202	252.5	232.4	192.9	270.2	1
TGGT1_204530	High	IsMasterProtein	TGGT1_204530-t26_1-p1	transcript=TGGT1_204530-t26_1 | gene=TGGT1_204530 | organism=Toxoplasma_gondii_GT1 | gene_product=Microneme protein MIC11 [Source:UniProtKB/TrEMBL;Acc:A0A125YJF7] | transcript_product=microneme protein MIC11 | location=TGGT1_chrVIIa:1632334-1633282(-) | protein_length=204 | sequence_SO=chromosome | SO=protein_coding_gene | is_pseudo=false	0	69.966	73	17	53	17	204	22.4	5.19	120.44	17	1.215	0.28	3.14686e-05	8032.8	6609.7	4.9	3.69	8586.7	7620.3	8158.4	7510.2	8404	7909.2	8172.8	7650.4	6614.3	6575.8	6846	6265.3	7123.4	6713.8	6597.8	6605	1	Methylthio [C90; C194]
TGGT1_223840	High	IsMasterProtein	TGGT1_223840-t26_1-p1	transcript=TGGT1_223840-t26_1 | gene=TGGT1_223840 | organism=Toxoplasma_gondii_GT1 | gene_product=Putative ATP-citrate lyase [Source:UniProtKB/TrEMBL;Acc:S7UW82] | transcript_product=putative ATP-citrate lyase | location=TGGT1_chrX:3444517-3448806(-) | protein_length=1281 | sequence_SO=chromosome | SO=protein_coding_gene | is_pseudo=false	0	50.23	14	15	22	15	1281	139.7	6.57	59.84	15	1.215	0.28	0.00164557	1193.7	982	8.8	3.86	1329.8	1132.7	1266.8	1116.9	1257.9	1077.2	1299.7	1071.5	1025.2	952.7	1011.1	1005.2	908.6	957.9	984	980.1	1
TGGT1_219120	High	IsMasterProtein	TGGT1_219120-t26_1-p1	transcript=TGGT1_219120-t26_1 | gene=TGGT1_219120 | organism=Toxoplasma_gondii_GT1 | gene_product=Zinc finger (CCCH type) motif-containing protein [Source:UniProtKB/TrEMBL;Acc:S7WHR5] | transcript_product=zinc finger (CCCH type) motif-containing protein | location=TGGT1_chrXII:1061429-1066155(+) | protein_length=1086 | sequence_SO=chromosome | SO=protein_coding_gene | is_pseudo=false	0	13.754	5	4	4	4	1086	115.8	7.75	11.05	4	1.217	0.28	0.00260763	288.3	236.9	9.3	6.35	274.3	305.3	270.6	313.3	249.8	302.9	257.8	319	217.4	236.5	238.5	262.6	222.8	237.3	222.8	248.8	1
TGGT1_310700	High	IsMasterProtein	TGGT1_310700-t26_1-p1	transcript=TGGT1_310700-t26_1 | gene=TGGT1_310700 | organism=Toxoplasma_gondii_GT1 | gene_product=Serine/threonine-protein phosphatase [Source:UniProtKB/TrEMBL;Acc:A0A125YY12] | transcript_product=serine/threonine phosophatase PP1 | location=TGGT1_chrXI:1487440-1488915(-) | protein_length=306 | sequence_SO=chromosome | SO=protein_coding_gene | is_pseudo=false	0	22.902	28	5	12	5	306	35	5.72	40.49	5	1.217	0.28	3.18188e-05	749.3	615.7	5.31	4.43	789.7	727.6	816	721.3	771.6	707.4	778.3	718.7	641.9	578.5	616.3	620.3	615.1	592.5	666.9	610.8	1	Methylthio [C201]
TGGT1_261510	High	IsMasterProtein	TGGT1_261510-t26_1-p1	transcript=TGGT1_261510-t26_1 | gene=TGGT1_261510 | organism=Toxoplasma_gondii_GT1 | gene_product=hypothetical protein | transcript_product=hypothetical protein | location=TGGT1_chrVIIb:1658155-1661185(-) | protein_length=566 | sequence_SO=chromosome | SO=protein_coding_gene | is_pseudo=false	0	7.887	4	3	3	2	566	63.9	10.77	8.1	3	1.218	0.28	0.0061891	117.6	96.5	11.13	7.02	110.6	108.4	125	108.7	132.9	98.9	134.8	125.5	96.8	90.7	88.3	96.2	101.8	103.7	105.7	89	1
TGGT1_278730	High	IsMasterProtein	TGGT1_278730-t26_1-p1	transcript=TGGT1_278730-t26_1 | gene=TGGT1_278730 | organism=Toxoplasma_gondii_GT1 | gene_product=Putative guanine nucleotide-binding protein [Source:UniProtKB/TrEMBL;Acc:S7UZP5] | transcript_product=putative guanine nucleotide-binding protein | location=TGGT1_chrXII:5829849-5835007(+) | protein_length=705 | sequence_SO=chromosome | SO=protein_coding_gene | is_pseudo=false	0.001	7.476	5	2	2	2	705	76.8	5.85	6.47	2	1.218	0.28	0.0221081	23.5	19.3	10.05	15.7	22.2	23.5	28.3	25.1	21.6	25.7	21.1	23.5	13.8	19.4	20.9	22.4	19.2	18.7	16	22.4	1
TGGT1_292140	High	IsMasterProtein	TGGT1_292140-t26_1-p1	transcript=TGGT1_292140-t26_1 | gene=TGGT1_292140 | organism=Toxoplasma_gondii_GT1 | gene_product=Protein kinase domain-containing protein [Source:UniProtKB/TrEMBL;Acc:S7UPS9] | transcript_product=NIMA-related protein kinase NIMA1 | location=TGGT1_chrIX:4379108-4386009(-) | protein_length=1609 | sequence_SO=chromosome | SO=protein_coding_gene | is_pseudo=false	0.001	5.221	2	2	2	2	1609	171.3	8.66	2.32	2	1.218	0.28	0.000242043	174.9	143.6	7	5.35	187.1	171	189.1	167.2	178.9	159.7	195.4	169.6	143.5	143.7	158	137.5	149.5	146.8	132.1	143.3	1
TGGT1_237410	High	IsMasterProtein	TGGT1_237410-t26_1-p1	transcript=TGGT1_237410-t26_1 | gene=TGGT1_237410 | organism=Toxoplasma_gondii_GT1 | gene_product=PPM-type phosphatase domain-containing protein [Source:UniProtKB/TrEMBL;Acc:S7W5F9] | transcript_product=protein phosphatase 2C domain-containing protein | location=TGGT1_chrX:5736246-5740962(-) | protein_length=1497 | sequence_SO=chromosome | SO=protein_coding_gene | is_pseudo=false	0.003	4.699	1	2	3	2	1497	160.4	6.73	4.87	2	1.204	0.27	0.00532628	96.5	80.2	11.32	4.75	91.9	102.3	118.5	85.1	89.3	101.3	106.7	90.2	84.5	76.4	75.3	83.1	78	83.9	76.5	82.3	1
TGGT1_320525	Medium	IsMasterProtein	TGGT1_320525-t26_1-p1	transcript=TGGT1_320525-t26_1 | gene=TGGT1_320525 | organism=Toxoplasma_gondii_GT1 | gene_product=DUF1308 domain-containing protein [Source:UniProtKB/TrEMBL;Acc:S7UJZ6] | transcript_product=hypothetical protein | location=TGGT1_chrIV:227285-229816(-) | protein_length=268 | sequence_SO=chromosome | SO=protein_coding_gene | is_pseudo=false	0.022	1.892	3	1	1	1	268	30.6	8.6	1.88	1	1.205	0.27	0.0804555	29.4	24.4	11.59	15.43	29.2	34.4	30.8	29.6	25.2	25.9	24.5	29.8	28.1	19.9	21.9	23.3	28.9	28.2	25.5	19.7	1
TGGT1_268690	High	IsMasterProtein	TGGT1_268690-t26_1-p1	transcript=TGGT1_268690-t26_1 | gene=TGGT1_268690 | organism=Toxoplasma_gondii_GT1 | gene_product=hypothetical protein | transcript_product=hypothetical protein | location=TGGT1_chrVIII:6360597-6363237(-) | protein_length=577 | sequence_SO=chromosome | SO=protein_coding_gene | is_pseudo=false	0.001	5.123	3	2	2	2	577	63.7	7.93	2.66	2	1.206	0.27	0.00185302	76.3	63.3	6.91	8.18	83.8	73.7	67.9	75.3	82.7	77.5	77.3	72.2	62	66.8	70.7	63.3	54.3	63.2	58.4	67	1
TGGT1_293310	Medium	IsMasterProtein	TGGT1_293310-t26_1-p1	transcript=TGGT1_293310-t26_1 | gene=TGGT1_293310 | organism=Toxoplasma_gondii_GT1 | gene_product=Putative ribosomal protein L20 [Source:UniProtKB/TrEMBL;Acc:A0A125YU11] | transcript_product=putative ribosomal protein L20 | location=TGGT1_chrIa:230621-230986(-) | protein_length=121 | sequence_SO=chromosome | SO=protein_coding_gene | is_pseudo=false	0.015	2.338	6	1	2	1	121	14.6	11.19	4.19	1	1.206	0.27	0.00260763	208.8	173.1	9.02	5.88	231.2	198.2	240.5	186	202.3	211.9	233	205.8	168.3	173.6	168.2	193.5	172.6	193.1	170.5	178.2	1
TGGT1_238080	High	IsMasterProtein	TGGT1_238080-t26_1-p1	transcript=TGGT1_238080-t26_1 | gene=TGGT1_238080 | organism=Toxoplasma_gondii_GT1 | gene_product=HIT-type domain-containing protein [Source:UniProtKB/TrEMBL;Acc:S7UQX7] | transcript_product=hypothetical protein | location=TGGT1_chrVI:56821-58606(+) | protein_length=431 | sequence_SO=chromosome | SO=protein_coding_gene | is_pseudo=false	0.003	4.697	8	2	2	2	431	47.1	5.08	0	2	1.207	0.27	0.607481	11.4	9.5	13.12	27.34	11.4	9.5	11.5	12.7	9.4	10.2	11.9	13.4	13	7.6	9.5	8.4	9.4	8.5	15.8	13	1
TGGT1_244240	High	IsMasterProtein	TGGT1_244240-t26_1-p1	transcript=TGGT1_244240-t26_1 | gene=TGGT1_244240 | organism=Toxoplasma_gondii_GT1 | gene_product=hypothetical protein | transcript_product=hypothetical protein | location=TGGT1_chrVI:3047331-3051089(+) | protein_length=447 | sequence_SO=chromosome | SO=protein_coding_gene | is_pseudo=false	0	7.78	8	3	4	3	447	48.7	8.27	5.14	3	1.207	0.27	0.000317729	203.1	168.2	6.19	5.62	203.5	202.7	206.9	187	217.7	209.1	196.1	179.3	175.3	155	176.4	164.4	152.2	162	173.1	172.2	1
TGGT1_268600	High	IsMasterProtein	TGGT1_268600-t26_1-p1	transcript=TGGT1_268600-t26_1 | gene=TGGT1_268600 | organism=Toxoplasma_gondii_GT1 | gene_product=DNA_pol_E_B domain-containing protein [Source:UniProtKB/TrEMBL;Acc:A0A125YJB0] | transcript_product=DNA polymerase epsilon subunit B protein | location=TGGT1_chrVIII:6399100-6403068(+) | protein_length=703 | sequence_SO=chromosome | SO=protein_coding_gene | is_pseudo=false	0.001	7.178	3	2	2	2	703	76.2	6.61	4.74	2	1.207	0.27	0.107273	34	28.2	18.47	8.72	35.1	31.7	43.8	29.3	39.6	23.2	33	35.3	30.6	24.2	32	26.6	26.8	27.9	29.2	28.4	1
TGGT1_255940	High	IsMasterProtein	TGGT1_255940-t26_1-p1	transcript=TGGT1_255940-t26_1 | gene=TGGT1_255940 | organism=Toxoplasma_gondii_GT1 | gene_product=DPH-type MB domain-containing protein [Source:UniProtKB/TrEMBL;Acc:S7W826] | transcript_product=hypothetical protein | location=TGGT1_chrVIIb:4531506-4532468(+) | protein_length=320 | sequence_SO=chromosome | SO=protein_coding_gene | is_pseudo=false	0	8.869	12	3	3	3	320	34.8	4.61	5.22	3	1.208	0.27	0.00482801	92.7	76.7	10.3	9	107.1	89.9	104.8	86.3	96.9	77.6	94.2	91.2	85.3	67.2	78.6	83	68.2	70.4	74.9	79.7	1
TGGT1_307650	High	IsMasterProtein	TGGT1_307650-t26_1-p1	transcript=TGGT1_307650-t26_1 | gene=TGGT1_307650 | organism=Toxoplasma_gondii_GT1 | gene_product=Uracil-DNA glycosylase [Source:UniProtKB/TrEMBL;Acc:S7UFJ0] | transcript_product=uracil-DNA glycosylase | location=TGGT1_chrIX:4825659-4829189(-) | protein_length=470 | sequence_SO=chromosome | SO=protein_coding_gene | is_pseudo=false	0	16.185	14	6	6	6	470	51.6	8.53	16.1	6	1.208	0.27	0.000124634	541.7	448.4	5.66	4.68	569.2	519	568	521.3	562.9	497.3	569.4	510.1	442.8	437.5	426.6	487.4	424.9	455.9	466.2	454.1	1
TGGT1_231160	High	IsMasterProtein	TGGT1_231160-t26_1-p1	transcript=TGGT1_231160-t26_1 | gene=TGGT1_231160 | organism=Toxoplasma_gondii_GT1 | gene_product=hypothetical protein | transcript_product=hypothetical protein | location=TGGT1_chrVIII:1271630-1273190(+) | protein_length=178 | sequence_SO=chromosome | SO=protein_coding_gene | is_pseudo=false	0.003	4.239	11	1	2	1	178	18.3	5.08	10.24	1	1.209	0.27	0.176591	133.2	110.2	17.3	17.72	127.4	149.8	117.7	139.2	114.3	89.5	143.9	158.9	84.1	137.5	90.4	120.6	100.7	120.6	97.3	129.7	1
TGGT1_227390	High	IsMasterProtein	TGGT1_227390-t26_1-p1	transcript=TGGT1_227390-t26_1 | gene=TGGT1_227390 | organism=Toxoplasma_gondii_GT1 | gene_product=SET domain-containing protein [Source:UniProtKB/TrEMBL;Acc:S7UX38] | transcript_product=hypothetical protein | location=TGGT1_chrX:876324-880460(-) | protein_length=1066 | sequence_SO=chromosome | SO=protein_coding_gene | is_pseudo=false	0	22.977	9	8	11	8	1066	116.1	5.25	19.91	8	1.21	0.27	0.00626506	221.8	183.3	9.3	7.36	223.3	191.4	237.4	201	239.2	220.2	246.9	201.4	182.8	171.6	215.6	185.8	172.9	189	183.8	180.8	1
TGGT1_237530	Medium	IsMasterProtein	TGGT1_237530-t26_1-p1	transcript=TGGT1_237530-t26_1 | gene=TGGT1_237530 | organism=Toxoplasma_gondii_GT1 | gene_product=hypothetical protein | transcript_product=hypothetical protein | location=TGGT1_chrX:5843803-5855401(+) | protein_length=1004 | sequence_SO=chromosome | SO=protein_coding_gene | is_pseudo=false	0.023	1.821	1	1	1	1	1004	109.4	9.23	0	1	1.21	0.27	0.0258922	16.9	14	19.88	12.1	23.6	22	13.5	16.5	17.3	19.5	14.6	16	11.6	15.1	13.4	15.8	10.9	13.8	14.1	14.1	1
TGGT1_214320	High	IsMasterProtein	TGGT1_214320-t26_1-p1	transcript=TGGT1_214320-t26_1 | gene=TGGT1_214320 | organism=Toxoplasma_gondii_GT1 | gene_product=MFS domain-containing protein [Source:UniProtKB/TrEMBL;Acc:A0A125YKB0] | transcript_product=facilitative glucose transporter GT1 | location=TGGT1_chrX:6138702-6140408(+) | protein_length=568 | sequence_SO=chromosome | SO=protein_coding_gene | is_pseudo=false	0	45.052	14	8	18	8	568	61.6	6.93	55.77	8	1.194	0.26	1.12518e-07	1755	1469.4	2.75	2.02	1855.2	1793.7	1750.8	1762.9	1720.5	1759.3	1700.2	1729.8	1470	1470.8	1461.4	1468.7	1403.1	1484.3	1433.4	1496	1
TGGT1_221580	High	IsMasterProtein	TGGT1_221580-t26_1-p1	transcript=TGGT1_221580-t26_1 | gene=TGGT1_221580 | organism=Toxoplasma_gondii_GT1 | gene_product=FtsJ domain-containing protein [Source:UniProtKB/TrEMBL;Acc:S7ULK0] | transcript_product=ribosomal RNA large subunit methyltransferase J protein | location=TGGT1_chrII:434837-447724(+) | protein_length=2180 | sequence_SO=chromosome | SO=protein_coding_gene | is_pseudo=false	0	11.528	3	4	5	4	2180	233.5	6.71	14.82	4	1.194	0.26	0.00478918	134.5	112.7	5.1	8.27	120	127.8	134.4	138.5	141.2	129.2	136.1	134.6	132.1	121.6	109.6	112.2	106.8	113.2	117.4	101.6	1
TGGT1_233860	Medium	IsMasterProtein	TGGT1_233860-t26_1-p1	transcript=TGGT1_233860-t26_1 | gene=TGGT1_233860 | organism=Toxoplasma_gondii_GT1 | gene_product=DALR anticodon binding domain-containing protein [Source:UniProtKB/TrEMBL;Acc:S7V3L2] | transcript_product=DALR anticodon binding domain-containing protein | location=TGGT1_chrVIII:2853752-2862716(+) | protein_length=1217 | sequence_SO=chromosome | SO=protein_coding_gene | is_pseudo=false	0.01	2.724	1	1	1	1	1217	134.3	8.41	2.15	1	1.194	0.26	0.059473	43.7	36.6	7.73	17.17	45.7	43.5	43.8	41.9	37.8	42.7	49.8	44.2	41.2	32.2	36.1	37	27.6	31.4	46.9	41.6	1
TGGT1_311040	High	IsMasterProtein	TGGT1_311040-t26_1-p1	transcript=TGGT1_311040-t26_1 | gene=TGGT1_311040 | organism=Toxoplasma_gondii_GT1 | gene_product=hypothetical protein | transcript_product=hypothetical protein | location=TGGT1_chrXI:1712492-1713547(+) | protein_length=351 | sequence_SO=chromosome | SO=protein_coding_gene | is_pseudo=false	0	12.108	12	4	6	4	351	38.1	6.54	11.17	4	1.194	0.26	0.00628934	166.5	139.5	8.65	4.81	175.9	166.2	183.1	148	173.2	148	166.9	147	151	134.7	131.7	147.5	134.2	139	142.9	140	1
TGGT1_202900	High	IsMasterProtein	TGGT1_202900-t26_1-p1	transcript=TGGT1_202900-t26_1 | gene=TGGT1_202900 | organism=Toxoplasma_gondii_GT1 | gene_product=Zinc finger (CCCH type) motif-containing protein [Source:UniProtKB/TrEMBL;Acc:S7UVM4] | transcript_product=zinc finger (CCCH type) motif-containing protein | location=TGGT1_chrVIIa:2849287-2853372(+) | protein_length=1298 | sequence_SO=chromosome | SO=protein_coding_gene | is_pseudo=false	0	19.453	6	8	9	8	1298	137.1	6.34	19.82	8	1.195	0.26	4.11396e-06	471	394.1	3.1	3.83	497.4	473.8	468.1	499.9	463.2	463.6	465.5	478.5	390.9	424.9	393.4	421.7	382.2	397.3	391.5	394.8	1
TGGT1_247610	High	IsMasterProtein	TGGT1_247610-t26_1-p1	transcript=TGGT1_247610-t26_1 | gene=TGGT1_247610 | organism=Toxoplasma_gondii_GT1 | gene_product=U6 snRNA-associated Sm-like protein LSm5 [Source:UniProtKB/TrEMBL;Acc:A0A125YYF1] | transcript_product=putative small nuclear ribonucleoprotein E | location=TGGT1_chrXII:3376784-3377500(-) | protein_length=119 | sequence_SO=chromosome | SO=protein_coding_gene | is_pseudo=false	0.001	5.335	25	2	2	2	119	12.4	4.72	6.13	2	1.195	0.26	0.0684384	448.6	375.4	16.83	12.07	529.1	365.1	475	423.7	514.6	400.9	583.6	389.8	406.7	343.5	430.9	359.1	451.8	336.8	392.4	329	1
TGGT1_248960	High	IsMasterProtein	TGGT1_248960-t26_1-p1	transcript=TGGT1_248960-t26_1 | gene=TGGT1_248960 | organism=Toxoplasma_gondii_GT1 | gene_product=Methyltransf_11 domain-containing protein [Source:UniProtKB/TrEMBL;Acc:S7V0W4] | transcript_product=methyltransferase domain-containing protein | location=TGGT1_chrXII:4205413-4209239(-) | protein_length=453 | sequence_SO=chromosome | SO=protein_coding_gene | is_pseudo=false	0.005	3.167	2	1	1	1	453	49.2	8.13	3.43	1	1.195	0.26	0.0404101	100.5	84.1	11.43	7.37	105.4	81.1	115	97.8	103.3	94.7	112	89.4	94	84.2	82.4	79	95	80	91.9	84	1
TGGT1_305610	High	IsMasterProtein	TGGT1_305610-t26_1-p1	transcript=TGGT1_305610-t26_1 | gene=TGGT1_305610 | organism=Toxoplasma_gondii_GT1 | gene_product=hypothetical protein | transcript_product=hypothetical protein | location=TGGT1_chrIX:5280437-5285939(-) | protein_length=481 | sequence_SO=chromosome | SO=protein_coding_gene | is_pseudo=false	0.003	4.406	5	2	2	2	481	52	5.38	2.49	2	1.195	0.26	0.0612918	36.5	30.5	13.65	18.69	48.6	37.5	43.2	40.4	32.5	35.2	35.5	35.3	34.1	29.2	27.5	39.8	31.9	22.3	38.4	28	1
TGGT1_230980	High	IsMasterProtein	TGGT1_230980-t26_1-p1	transcript=TGGT1_230980-t26_1 | gene=TGGT1_230980 | organism=Toxoplasma_gondii_GT1 | gene_product=Myosin motor domain-containing protein [Source:UniProtKB/TrEMBL;Acc:S7V2Q6] | transcript_product=myosin I | location=TGGT1_chrVIII:1151501-1167169(-) | protein_length=1821 | sequence_SO=chromosome | SO=protein_coding_gene | is_pseudo=false	0	28.516	6	10	11	10	1821	200.6	6.21	29.53	10	1.196	0.26	0.000119624	512.1	428.3	3.68	5.38	520.1	509.8	491.6	482.2	516.2	514.5	517.3	471.6	430.3	400.5	457.2	432.5	425	381.7	432.3	426.2	1
TGGT1_253810	High	IsMasterProtein	TGGT1_253810-t26_1-p1	transcript=TGGT1_253810-t26_1 | gene=TGGT1_253810 | organism=Toxoplasma_gondii_GT1 | gene_product=hypothetical protein | transcript_product=hypothetical protein | location=TGGT1_chrIII:1192914-1199831(-) | protein_length=1306 | sequence_SO=chromosome | SO=protein_coding_gene | is_pseudo=false	0	12.952	5	6	7	6	1306	138.9	5.78	9.97	6	1.197	0.26	0.0405739	170.6	142.5	13.8	6.34	140.9	164.6	158.5	176.8	148.3	209.4	188.3	194.8	148.9	142.1	142.8	157.2	141	134.6	139.4	161.5	1
TGGT1_309930	High	IsMasterProtein	TGGT1_309930-t26_1-p1	transcript=TGGT1_309930-t26_1 | gene=TGGT1_309930 | organism=Toxoplasma_gondii_GT1 | gene_product=Alpha-galactosidase [Source:UniProtKB/TrEMBL;Acc:S7W7S4] | transcript_product=melibiase subfamily protein | location=TGGT1_chrXI:871310-877489(-) | protein_length=982 | sequence_SO=chromosome | SO=protein_coding_gene | is_pseudo=false	0	20.73	10	8	11	8	982	108.5	4.77	19.91	8	1.197	0.26	0.000102783	572.4	478.2	4.84	5.26	566.5	567.9	584.6	585.6	543.8	601.8	514.2	576.9	478.2	478.2	461.7	485.7	447.4	509.2	433.5	494.9	1
TGGT1_268000	High	IsMasterProtein	TGGT1_268000-t26_1-p1	transcript=TGGT1_268000-t26_1 | gene=TGGT1_268000 | organism=Toxoplasma_gondii_GT1 | gene_product=hypothetical protein | transcript_product=hypothetical protein | location=TGGT1_chrVIII:6721802-6732429(-) | protein_length=1190 | sequence_SO=chromosome | SO=protein_coding_gene | is_pseudo=false	0	12.909	5	4	4	4	1190	132.8	5.3	11.5	4	1.198	0.26	0.000266715	136.5	113.9	5.21	5.68	144.2	137.9	134.7	141.8	128.4	127.7	147.6	135	129	117	110	112.6	114.8	113.1	120.8	108.8	1
TGGT1_270090	High	IsMasterProtein	TGGT1_270090-t26_1-p1	transcript=TGGT1_270090-t26_1 | gene=TGGT1_270090 | organism=Toxoplasma_gondii_GT1 | gene_product=AAA_12 domain-containing protein [Source:UniProtKB/TrEMBL;Acc:S7WKH0] | transcript_product=hypothetical protein | location=TGGT1_chrVIII:5412338-5427669(-) | protein_length=1935 | sequence_SO=chromosome | SO=protein_coding_gene | is_pseudo=false	0	10.422	3	4	5	4	1935	207.9	8.7	5.36	4	1.199	0.26	0.0470896	119.1	99.3	16.68	6.63	103.2	132.5	106.6	134.6	107	146.3	95	143.4	85.8	104.2	97.8	108.7	98.2	98.2	100.8	100.4	1
TGGT1_306190	High	IsMasterProtein	TGGT1_306190-t26_1-p1	transcript=TGGT1_306190-t26_1 | gene=TGGT1_306190 | organism=Toxoplasma_gondii_GT1 | gene_product=hypothetical protein | transcript_product=hypothetical protein | location=TGGT1_chrIX:5600255-5603264(+) | protein_length=469 | sequence_SO=chromosome | SO=protein_coding_gene | is_pseudo=false	0	56.527	38	16	29	16	469	49.3	8.18	73.07	16	1.2	0.26	0.00012273	3670.7	3059.3	5.44	2.26	3890.6	3493	3837.6	3511.1	3909	3499.5	3865.8	3505.6	3117.1	3034.4	3158.6	2986.7	3124.2	2980.1	3084.4	3001.3	1
TGGT1_319340	High	IsMasterProtein	TGGT1_319340-t26_1-p1	transcript=TGGT1_319340-t26_1 | gene=TGGT1_319340 | organism=Toxoplasma_gondii_GT1 | gene_product=hypothetical protein | transcript_product=hypothetical protein | location=TGGT1_chrIV:962742-964670(+) | protein_length=481 | sequence_SO=chromosome | SO=protein_coding_gene | is_pseudo=false	0	33.192	18	10	27	10	481	52.4	5.87	63.32	10	1.2	0.26	1.22455e-06	4257.7	3549	3.07	1.42	4178.7	4310.6	4205.4	4360.7	4155	4510.8	4148.9	4387.9	3481.5	3581.8	3538.2	3563.2	3528.1	3559.8	3614.5	3462.5	1
TGGT1_308590	High	IsMasterProtein	TGGT1_308590-t26_1-p1	transcript=TGGT1_308590-t26_1 | gene=TGGT1_308590 | organism=Toxoplasma_gondii_GT1 | gene_product=MPN domain-containing protein [Source:UniProtKB/TrEMBL;Acc:S7USQ6] | transcript_product=Mov34/MPN/PAD-1 family protein | location=TGGT1_chrXI:232137-236187(-) | protein_length=489 | sequence_SO=chromosome | SO=protein_coding_gene | is_pseudo=false	0.001	6.68	7	3	3	3	489	53.6	5.91	3.95	3	1.201	0.26	6.38082e-05	335.9	279.7	3.39	5	330.2	343.7	335	338	311.6	321.9	345.2	336.8	274.5	311.2	275.1	283.9	262.2	277.2	282.3	286	1
TGGT1_202780	High	IsMasterProtein	TGGT1_202780-t26_1-p1	transcript=TGGT1_202780-t26_1 | gene=TGGT1_202780 | organism=Toxoplasma_gondii_GT1 | gene_product=Protein kinase domain-containing protein [Source:UniProtKB/TrEMBL;Acc:S7UUP9] | transcript_product=rhoptry kinase family protein ROP25 | location=TGGT1_chrVIIa:2933158-2936550(-) | protein_length=1123 | sequence_SO=chromosome | SO=protein_coding_gene | is_pseudo=false	0	32.051	11	14	16	14	1123	120.4	6.44	28.54	14	1.185	0.25	6.90769e-05	1034.1	872.4	3.89	4.41	995.1	1064.3	993.7	1060.5	950.6	1025.7	1042.6	1049.5	809.8	897.1	862.5	927.6	843.8	877.2	867.7	916.6	1
TGGT1_224310	Medium	IsMasterProtein	TGGT1_224310-t26_1-p1	transcript=TGGT1_224310-t26_1 | gene=TGGT1_224310 | organism=Toxoplasma_gondii_GT1 | gene_product=Palmitoyltransferase [Source:UniProtKB/TrEMBL;Acc:S7UWJ1] | transcript_product=DHHC zinc finger domain-containing protein | location=TGGT1_chrX:3002343-3010266(+) | protein_length=391 | sequence_SO=chromosome | SO=protein_coding_gene | is_pseudo=false	0.01	2.692	3	1	1	1	391	42.8	7.25	1.63	1	1.186	0.25	0.0253267	45.5	38.3	14.41	8.5	44.2	44	59.4	41	50.1	46.8	58.3	43.5	36.5	38.1	37.5	37.4	45.4	44.3	41.8	38.5	1
TGGT1_262560	High	IsMasterProtein	TGGT1_262560-t26_1-p1	transcript=TGGT1_262560-t26_1 | gene=TGGT1_262560 | organism=Toxoplasma_gondii_GT1 | gene_product=hypothetical protein | transcript_product=hypothetical protein | location=TGGT1_chrVIIb:1134862-1136586(+) | protein_length=283 | sequence_SO=chromosome | SO=protein_coding_gene | is_pseudo=false	0	20.486	25	7	10	7	283	29	7.09	19.98	7	1.186	0.25	0.00156377	518.3	437.1	7.42	4	533.1	503.9	542.7	465.6	540.7	469.8	566	480.4	409.1	436.8	447.1	437.3	461.2	441.8	415.7	421.4	1
TGGT1_313640	High	IsMasterProtein	TGGT1_313640-t26_1-p1	transcript=TGGT1_313640-t26_1 | gene=TGGT1_313640 | organism=Toxoplasma_gondii_GT1 | gene_product=hypothetical protein | transcript_product=hypothetical protein | location=TGGT1_chrXI:3542451-3543056(+) | protein_length=201 | sequence_SO=chromosome | SO=protein_coding_gene | is_pseudo=false	0	21.092	35	6	16	6	201	22.3	6.39	48.73	6	1.186	0.25	0.00167158	1060.7	894.4	7.2	3.93	1124.5	978.3	1179	1009.7	1131.8	1026.6	1095.9	980.2	986.8	882.9	887.1	900.1	882.9	888.6	932.4	910.3	1	Methylthio [C133; C191]
TGGT1_235610	High	IsMasterProtein	TGGT1_235610-t26_1-p1	transcript=TGGT1_235610-t26_1 | gene=TGGT1_235610 | organism=Toxoplasma_gondii_GT1 | gene_product=ATPase, AAA family protein [Source:UniProtKB/TrEMBL;Acc:S7VZQ6] | transcript_product=ATPase, AAA family protein | location=TGGT1_chrX:4867272-4876338(-) | protein_length=1254 | sequence_SO=chromosome | SO=protein_coding_gene | is_pseudo=false	0	16.946	4	5	6	4	1254	134.6	6.74	20.2	5	1.187	0.25	0.000106751	331.4	279.1	2.97	5.45	338.2	331.5	349.7	331.3	342.1	327.5	321.8	321.4	279	269.5	301	288.5	279.2	285.3	270.7	250	1
TGGT1_207390	High	IsMasterProtein	TGGT1_207390-t26_1-p1	transcript=TGGT1_207390-t26_1 | gene=TGGT1_207390 | organism=Toxoplasma_gondii_GT1 | gene_product=MHD domain-containing protein [Source:UniProtKB/TrEMBL;Acc:A0A125YV18] | transcript_product=putative coatomer protein complex, gamma sub-unit | location=TGGT1_chrIb:35486-42587(-) | protein_length=517 | sequence_SO=chromosome | SO=protein_coding_gene | is_pseudo=false	0.005	3.374	2	1	1	1	517	56	8.35	3.22	1	1.188	0.25	0.156217	32.6	27.4	19.14	12.31	39.9	26.9	34.1	27.1	42.8	31.2	34.2	25.7	34.8	27.9	27.9	27	24.4	23.8	29.8	26.9	1
TGGT1_221675A	High	IsMasterProtein	TGGT1_221675A-t26_1-p1	transcript=TGGT1_221675A-t26_1 | gene=TGGT1_221675A | organism=Toxoplasma_gondii_GT1 | gene_product=hypothetical protein | transcript_product=hypothetical protein | location=TGGT1_chrII:544014-546729(-) | protein_length=557 | sequence_SO=chromosome | SO=protein_coding_gene | is_pseudo=false	0.001	7.35	12	3	3	1	557	62.2	10.01	3.09	3	1.188	0.25	0.708445	27	22.7	30.48	16.07	22.1	32.5	17.7	32.1	22.6	33.9	14.6	35.1	23.3	24.6	20.7	28.9	29.5	19.2	22.1	21	1
TGGT1_230190	High	IsMasterProtein	TGGT1_230190-t26_1-p1	transcript=TGGT1_230190-t26_1 | gene=TGGT1_230190 | organism=Toxoplasma_gondii_GT1 | gene_product=hypothetical protein | transcript_product=hypothetical protein | location=TGGT1_chrVIII:671191-672375(+) | protein_length=290 | sequence_SO=chromosome | SO=protein_coding_gene | is_pseudo=false	0.003	4.034	8	2	2	2	290	31.2	10.37	4.17	2	1.188	0.25	0.0220036	62	52.2	8.46	11.09	56.2	62.6	57.6	61.4	66.5	64.6	58	72	47.3	53.6	48.9	61.3	50.8	56.1	46.9	61.6	1
TGGT1_255900	High	IsMasterProtein	TGGT1_255900-t26_1-p1	transcript=TGGT1_255900-t26_1 | gene=TGGT1_255900 | organism=Toxoplasma_gondii_GT1 | gene_product=Putative Bax inhibitor-1 [Source:UniProtKB/TrEMBL;Acc:A0A125YLC2] | transcript_product=putative Bax inhibitor-1 | location=TGGT1_chrVIIb:4548381-4550106(-) | protein_length=248 | sequence_SO=chromosome | SO=protein_coding_gene | is_pseudo=false	0.003	4.53	7	2	3	2	248	27.8	9.32	4.9	2	1.188	0.25	0.00295012	379.8	319.7	6.54	9.69	385	370.5	418.8	354	430.2	375.6	377.6	382	341.6	310.4	321.6	267.5	351.7	280.2	347.6	317.9	1
TGGT1_272630	High	IsMasterProtein	TGGT1_272630-t26_1-p1	transcript=TGGT1_272630-t26_1 | gene=TGGT1_272630 | organism=Toxoplasma_gondii_GT1 | gene_product=U6 snRNA-associated Sm-like protein LSm8 [Source:UniProtKB/TrEMBL;Acc:S7WJL9] | transcript_product=putative U6 snRNA-associated Sm family protein LSm8 | location=TGGT1_chrVIII:3831286-3832866(+) | protein_length=129 | sequence_SO=chromosome | SO=protein_coding_gene | is_pseudo=false	0.001	5.525	16	2	2	2	129	14.5	7.87	5.3	2	1.188	0.25	0.0521727	42.4	35.7	13.97	5.86	52	35.9	47.3	45.5	41.7	43	40.6	33.8	35.5	35.2	38.8	32.3	37.3	35.7	35.7	38.8	1
TGGT1_264720	Low	IsMasterProtein	TGGT1_264720-t26_1-p1	transcript=TGGT1_264720-t26_1 | gene=TGGT1_264720 | organism=Toxoplasma_gondii_GT1 | gene_product=hypothetical protein | transcript_product=hypothetical protein | location=TGGT1_chrIX:1909847-1915134(-) | protein_length=899 | sequence_SO=chromosome | SO=protein_coding_gene | is_pseudo=false	0.051	1.396	2	1	1	1	899	101.6	9.42	0	1	1.19	0.25	0.560626	15.6	13.1	19.62	18.65	11.4	19.1	16.8	13.4	10.8	17.1	14.7	16.5	17.4	11	11.3	17.7	13.1	13.1	14.6	12.1	1
TGGT1_265260	High	IsMasterProtein	TGGT1_265260-t26_1-p1	transcript=TGGT1_265260-t26_1 | gene=TGGT1_265260 | organism=Toxoplasma_gondii_GT1 | gene_product=hypothetical protein | transcript_product=hypothetical protein | location=TGGT1_chrIX:1464253-1467357(+) | protein_length=459 | sequence_SO=chromosome | SO=protein_coding_gene | is_pseudo=false	0	17.576	16	6	8	6	459	49.1	5.22	13.55	6	1.19	0.25	3.08178e-05	316.9	266.2	4.12	4.46	336.1	323.5	307.2	293.6	309.1	325.9	315.8	317.9	265.2	258.3	260.5	275.3	242.4	280.5	267.3	272.2	1
TGGT1_271070	High	IsMasterProtein	TGGT1_271070-t26_1-p1	transcript=TGGT1_271070-t26_1 | gene=TGGT1_271070 | organism=Toxoplasma_gondii_GT1 | gene_product=OTU domain-containing protein [Source:UniProtKB/TrEMBL;Acc:S7WKE7] | transcript_product=hypothetical protein | location=TGGT1_chrVIII:4737763-4739363(-) | protein_length=347 | sequence_SO=chromosome | SO=protein_coding_gene | is_pseudo=false	0.006	3.112	5	1	1	1	347	38.2	6.23	3.07	1	1.19	0.25	0.111315	53.3	44.8	4.35	16.43	57.3	56.1	52.6	51.4	51.4	54.1	54.1	51	37.2	45.3	49.5	43.4	44.4	63.6	44.3	51.1	1
TGGT1_281620	High	IsMasterProtein	TGGT1_281620-t26_1-p1	transcript=TGGT1_281620-t26_1 | gene=TGGT1_281620 | organism=Toxoplasma_gondii_GT1 | gene_product=Aldo_ket_red domain-containing protein [Source:UniProtKB/TrEMBL;Acc:S7UV92] | transcript_product=aldo/keto reductase family oxidoreductase | location=TGGT1_chrVIIa:4126180-4129748(-) | protein_length=530 | sequence_SO=chromosome | SO=protein_coding_gene | is_pseudo=false	0	17.628	10	6	8	6	530	57.8	8.05	17.86	6	1.19	0.25	7.5111e-05	492.6	413.9	3.43	5.04	497.3	496.6	524.4	473.9	503.2	472.6	483.7	488.7	395.6	417.2	429.4	388.2	410.6	426.7	455.4	410.6	1
TGGT1_311110	High	IsMasterProtein	TGGT1_311110-t26_1-p1	transcript=TGGT1_311110-t26_1 | gene=TGGT1_311110 | organism=Toxoplasma_gondii_GT1 | gene_product=Putative Ubiquitin-fold modifier 1 family protein [Source:UniProtKB/TrEMBL;Acc:A0A125YFZ1] | transcript_product=putative Ubiquitin-fold modifier 1 precursor family protein | location=TGGT1_chrXI:1777787-1778994(+) | protein_length=91 | sequence_SO=chromosome | SO=protein_coding_gene | is_pseudo=false	0	11.178	23	3	10	3	91	9.5	8.91	21.74	3	1.19	0.25	4.11337e-06	1053.4	885.5	1.9	3.58	1073.6	1076.5	1052.6	1046.7	1091.2	1054.2	1047.7	1028.4	849.6	912.3	909.4	864.8	901.2	927.9	843.7	870.1	1
TGGT1_312160	High	IsMasterProtein	TGGT1_312160-t26_1-p1	transcript=TGGT1_312160-t26_1 | gene=TGGT1_312160 | organism=Toxoplasma_gondii_GT1 | gene_product=hypothetical protein | transcript_product=hypothetical protein | location=TGGT1_chrXI:2430558-2432033(-) | protein_length=199 | sequence_SO=chromosome | SO=protein_coding_gene | is_pseudo=false	0.003	4.011	7	1	2	1	199	22.2	9.11	6.83	1	1.19	0.25	0.00357065	298.2	250.6	7.49	7.87	315.3	288.6	308.1	278.9	309.2	259.5	324.5	280.3	224.1	247.9	284.3	253.3	236.6	228.8	262.7	256.7	1
TGGT1_268280	High	IsMasterProtein	TGGT1_268280-t26_1-p1	transcript=TGGT1_268280-t26_1 | gene=TGGT1_268280 | organism=Toxoplasma_gondii_GT1 | gene_product=Chromo domain-containing protein [Source:UniProtKB/TrEMBL;Acc:S7V4G2] | transcript_product='chromo' (CHRromatin Organization MOdifier) domain-containing protein | location=TGGT1_chrVIII:6572791-6584129(-) | protein_length=1405 | sequence_SO=chromosome | SO=protein_coding_gene | is_pseudo=false	0	17.769	4	6	7	6	1405	154.2	5.96	20.16	6	1.191	0.25	0.000128022	225.3	189.2	4.67	4.14	226.2	228.1	237.4	222.5	228.5	224.5	203.6	212.8	203.2	181.4	194.7	189.8	188.5	186.4	201	183.6	1
TGGT1_218400	Low	IsMasterProtein	TGGT1_218400-t26_1-p1	transcript=TGGT1_218400-t26_1 | gene=TGGT1_218400 | organism=Toxoplasma_gondii_GT1 | gene_product=Protein kinase domain-containing protein [Source:UniProtKB/TrEMBL;Acc:S7V1E2] | transcript_product=NEK kinase | location=TGGT1_chrXII:1477960-1488478(-) | protein_length=2880 | sequence_SO=chromosome | SO=protein_coding_gene | is_pseudo=false	0.06	1.327	0	1	1	1	2880	316.6	8.25	1.76	1	1.192	0.25	0.243776	36.4	30.5	25.57	10.95	44.4	41.4	31.9	27.9	48	27.7	46.6	25.5	28.8	31.7	29.4	32.5	33.2	28.1	34.9	24.6	1
TGGT1_247440	High	IsMasterProtein	TGGT1_247440-t26_1-p1	transcript=TGGT1_247440-t26_1 | gene=TGGT1_247440 | organism=Toxoplasma_gondii_GT1 | gene_product=hypothetical protein | transcript_product=hypothetical protein | location=TGGT1_chrXII:3270269-3271405(-) | protein_length=378 | sequence_SO=chromosome | SO=protein_coding_gene | is_pseudo=false	0	50.543	41	13	27	13	378	40.1	9.66	87.41	13	1.192	0.25	0.000128389	1548.6	1298.8	4.51	3.16	1542.1	1570.5	1479.9	1563.2	1420.3	1555.1	1411.6	1578.9	1278.9	1321.6	1316.2	1363.4	1281.5	1278.9	1273.6	1380.5	1
TGGT1_313020	High	IsMasterProtein	TGGT1_313020-t26_1-p1	transcript=TGGT1_313020-t26_1 | gene=TGGT1_313020 | organism=Toxoplasma_gondii_GT1 | gene_product=STAS domain-containing protein [Source:UniProtKB/TrEMBL;Acc:S7UTK8] | transcript_product=STAS domain-containing protein | location=TGGT1_chrXI:3003249-3012926(+) | protein_length=1120 | sequence_SO=chromosome | SO=protein_coding_gene | is_pseudo=false	0	8.286	3	3	5	3	1120	122.7	7.44	11.51	3	1.192	0.25	0.0567996	24.1	20.2	13.21	17.97	28.7	24.5	29.5	24.4	20.6	23.9	20.9	23.1	20.4	13.3	18.7	23.5	20.1	21.8	23.9	16.5	1
TGGT1_318640	High	IsMasterProtein	TGGT1_318640-t26_1-p1	transcript=TGGT1_318640-t26_1 | gene=TGGT1_318640 | organism=Toxoplasma_gondii_GT1 | gene_product=hypothetical protein | transcript_product=hypothetical protein | location=TGGT1_chrIV:1115841-1120607(-) | protein_length=953 | sequence_SO=chromosome | SO=protein_coding_gene | is_pseudo=false	0.001	5.656	3	2	2	2	953	104.1	7.01	5.16	2	1.192	0.25	0.38308	6.6	5.5	30.8	22.93	6.6	8.9	8.9	5	3.9	9.8	6.6	5.4	4.4	4.8	7.2	6.1	5.1	4.2	6.3	7.7	1
TGGT1_218520	High	IsMasterProtein	TGGT1_218520-t26_1-p1	transcript=TGGT1_218520-t26_1 | gene=TGGT1_218520 | organism=Toxoplasma_gondii_GT1 | gene_product=Microneme protein MIC6 [Source:UniProtKB/TrEMBL;Acc:S7V1D9] | transcript_product=microneme protein MIC6 | location=TGGT1_chrXII:1418869-1419918(-) | protein_length=349 | sequence_SO=chromosome | SO=protein_coding_gene | is_pseudo=false	0	75.793	38	19	52	19	349	36.6	4.69	169.91	19	1.193	0.25	6.15382e-05	3888.9	3260.9	4.55	2.01	3978.5	3679.9	3990.2	3596.1	4084.7	3801.3	3987.3	3748.4	3278.9	3243.1	3169	3151.9	3286.7	3344.1	3300.5	3237	1	Methylthio [C122]
TGGT1_317705	Medium	IsMasterProtein	TGGT1_317705-t26_1-p1	transcript=TGGT1_317705-t26_1 | gene=TGGT1_317705 | organism=Toxoplasma_gondii_GT1 | gene_product=Enoyl-CoA hydratase/isomerase family protein [Source:UniProtKB/TrEMBL;Acc:S7UFF2] | transcript_product=enoyl-CoA hydratase/isomerase family protein | location=TGGT1_chrIV:2513190-2516800(+) | protein_length=371 | sequence_SO=chromosome | SO=protein_coding_gene | is_pseudo=false	0.014	2.429	2	1	1	1	371	40.8	8.98	2.79	1	1.193	0.25	0.553829	38.7	32.5	27.44	5.02	37.6	39.8	29.2	51	28.8	43.5	20.8	46.5	35.1	30.8	32.6	30.7	32.3	32.4	32.5	35	1
TGGT1_210230	High	IsMasterProtein	TGGT1_210230-t26_1-p1	transcript=TGGT1_210230-t26_1 | gene=TGGT1_210230 | organism=Toxoplasma_gondii_GT1 | gene_product=S4 RNA-binding domain-containing protein [Source:UniProtKB/TrEMBL;Acc:S7VXD4] | transcript_product=hypothetical protein | location=TGGT1_chrIX:4741989-4747832(-) | protein_length=640 | sequence_SO=chromosome | SO=protein_coding_gene | is_pseudo=false	0.003	3.863	3	1	1	1	640	70.4	8.16	3.29	1	1.178	0.24	0.480776	12.7	10.8	30.39	18.16	7.5	14	18.4	11.6	8.1	15.4	10.7	15.7	8	13.7	9.9	10.1	8.7	12.5	11.6	11.9	1
TGGT1_245720	High	IsMasterProtein	TGGT1_245720-t26_1-p1	transcript=TGGT1_245720-t26_1 | gene=TGGT1_245720 | organism=Toxoplasma_gondii_GT1 | gene_product=Helicase C-terminal domain-containing protein [Source:UniProtKB/TrEMBL;Acc:S7V176] | transcript_product=SWI2/SNF2-containing protein | location=TGGT1_chrXII:2416549-2434029(+) | protein_length=3129 | sequence_SO=chromosome | SO=protein_coding_gene | is_pseudo=false	0	30.54	4	10	10	10	3129	339.6	7.59	27.11	10	1.179	0.24	0.000312205	582.2	493.7	4.93	5.22	596	577.1	595.2	623.7	587.3	534	572.8	547.1	482.6	512.5	474.8	480.6	452.7	521.5	505	526.5	1
TGGT1_311660	High	IsMasterProtein	TGGT1_311660-t26_1-p1	transcript=TGGT1_311660-t26_1 | gene=TGGT1_311660 | organism=Toxoplasma_gondii_GT1 | gene_product=SET domain-containing protein [Source:UniProtKB/TrEMBL;Acc:S7W1X7] | transcript_product=putative histone lysine methyltransferase, SET | location=TGGT1_chrXI:2147717-2157389(-) | protein_length=1795 | sequence_SO=chromosome | SO=protein_coding_gene | is_pseudo=false	0.001	6.387	2	3	3	3	1795	195.4	7.39	5.23	3	1.179	0.24	0.00153359	81.5	69.2	7.81	6.04	79	73.9	77.6	95.7	83.7	82.6	82	81.1	65.4	73.8	63.4	64.4	68.1	70.6	74.3	70.2	1
TGGT1_226590	High	IsMasterProtein	TGGT1_226590-t26_1-p1	transcript=TGGT1_226590-t26_1 | gene=TGGT1_226590 | organism=Toxoplasma_gondii_GT1 | gene_product=COX2_CUA domain-containing protein [Source:UniProtKB/TrEMBL;Acc:A0A125YNU6] | transcript_product=putative cytochrome C oxidase subunit IIa | location=TGGT1_chrX:1425019-1427425(+) | protein_length=299 | sequence_SO=chromosome | SO=protein_coding_gene | is_pseudo=false	0	22.602	28	6	11	6	299	34.5	8.22	32.91	6	1.18	0.24	0.00121875	963.2	816.1	6.36	3.84	1047.5	893.2	986.2	881	984.8	942	988.5	886.5	841.1	805.1	827.4	801.9	862.4	781.9	859.6	786.8	1
TGGT1_270840	High	IsMasterProtein	TGGT1_270840-t26_1-p1	transcript=TGGT1_270840-t26_1 | gene=TGGT1_270840 | organism=Toxoplasma_gondii_GT1 | gene_product=Poly [ADP-ribose] polymerase [Source:UniProtKB/TrEMBL;Acc:S7V536] | transcript_product=poly(ADP-ribose) polymerase catalytic domain-containing protein | location=TGGT1_chrVIII:4946767-4963422(+) | protein_length=1012 | sequence_SO=chromosome | SO=protein_coding_gene | is_pseudo=false	0	40.146	14	14	17	14	1012	113.3	8.79	43.01	14	1.18	0.24	9.1547e-06	1367	1158.3	4.11	2.33	1445.6	1342.3	1373.6	1289.1	1418	1360.6	1458.6	1358.1	1104.1	1175.3	1183.1	1163.3	1136.9	1123.8	1160.8	1155.8	1
TGGT1_212940	High	IsMasterProtein	TGGT1_212940-t26_1-p1	transcript=TGGT1_212940-t26_1 | gene=TGGT1_212940 | organism=Toxoplasma_gondii_GT1 | gene_product=CNDH2_C domain-containing protein [Source:UniProtKB/TrEMBL;Acc:S7W3T1] | transcript_product=hypothetical protein | location=TGGT1_chrV:577502-587862(-) | protein_length=1394 | sequence_SO=chromosome | SO=protein_coding_gene | is_pseudo=false	0.001	6.462	1	2	2	2	1394	152.2	6.37	7.99	2	1.181	0.24	0.100428	63.7	53.9	9.35	9.26	67.7	63.6	66.4	57.6	54.1	55.4	69.4	63.7	60.1	54.1	50.5	60.4	65.3	53.1	51.7	53.7	1
TGGT1_320080	High	IsMasterProtein	TGGT1_320080-t26_1-p1	transcript=TGGT1_320080-t26_1 | gene=TGGT1_320080 | organism=Toxoplasma_gondii_GT1 | gene_product=hypothetical protein | transcript_product=hypothetical protein | location=TGGT1_chrIV:470763-478288(+) | protein_length=1673 | sequence_SO=chromosome | SO=protein_coding_gene | is_pseudo=false	0	50.131	11	17	20	17	1673	170.7	6.98	52.51	17	1.181	0.24	3.0692e-08	1247.5	1056.5	1.66	2.03	1267.7	1246.3	1220.4	1250	1248.6	1225.7	1280.5	1230.4	1054	1079.1	1036.2	1059	1054.1	1085	1043.5	1098.4	1
TGGT1_242880	High	IsMasterProtein	TGGT1_242880-t26_1-p1	transcript=TGGT1_242880-t26_1 | gene=TGGT1_242880 | organism=Toxoplasma_gondii_GT1 | gene_product=Flavoprotein domain-containing protein [Source:UniProtKB/TrEMBL;Acc:S7W0N6] | transcript_product=flavoprotein | location=TGGT1_chrVI:2285859-2288863(-) | protein_length=285 | sequence_SO=chromosome | SO=protein_coding_gene | is_pseudo=false	0.003	4.004	5	1	2	1	285	30.9	6.42	9.33	1	1.183	0.24	0.646656	24.3	20.6	13.71	17.75	24.6	25.2	26.3	24	19.7	21.9	25.3	17.3	19.2	18.7	24.9	20	17.5	21.2	26.1	28.1	1
TGGT1_248640	High	IsMasterProtein	TGGT1_248640-t26_1-p1	transcript=TGGT1_248640-t26_1 | gene=TGGT1_248640 | organism=Toxoplasma_gondii_GT1 | gene_product=Regulator of chromosome condensation (RCC1) repeat-containing protein [Source:UniProtKB/TrEMBL;Acc:S7V0M7] | transcript_product=regulator of chromosome condensation (RCC1) repeat-containing protein | location=TGGT1_chrXII:3975088-3997910(+) | protein_length=1761 | sequence_SO=chromosome | SO=protein_…	0.001	5.165	1	2	2	2	1761	193.1	6.57	5.19	2	1.183	0.24	0.0282216	45.4	38.4	12.82	9.83	53.4	46.6	45.9	44.8	33.8	44.1	44.8	51.5	43	37.8	33.4	33.8	33.7	38.9	41	40.2	1
TGGT1_231370	High	IsMasterProtein	TGGT1_231370-t26_1-p1	transcript=TGGT1_231370-t26_1 | gene=TGGT1_231370 | organism=Toxoplasma_gondii_GT1 | gene_product=PNPLA domain-containing protein [Source:UniProtKB/TrEMBL;Acc:S7V258] | transcript_product=phospholipase, patatin family protein | location=TGGT1_chrVIII:1371428-1380756(-) | protein_length=2904 | sequence_SO=chromosome | SO=protein_coding_gene | is_pseudo=false	0	11.239	2	4	5	4	2904	315.4	6.21	10.97	4	1.184	0.24	0.174885	58.3	49.3	12.99	14.18	61.7	59.6	71.7	57	51.1	47.7	52.7	60.6	58.8	46.4	49.1	48.7	39.8	53.7	49.4	62.9	1
TGGT1_245490	High	IsMasterProtein	TGGT1_245490-t26_1-p1	transcript=TGGT1_245490-t26_1 | gene=TGGT1_245490 | organism=Toxoplasma_gondii_GT1 | gene_product=Microneme protein MIC8 [Source:UniProtKB/TrEMBL;Acc:A0A125YJZ7] | transcript_product=microneme protein MIC8 | location=TGGT1_chrXII:2242495-2244549(+) | protein_length=684 | sequence_SO=chromosome | SO=protein_coding_gene | is_pseudo=false	0	26.475	11	8	18	8	684	74.5	5.43	43.25	8	1.184	0.24	0.00114926	1822	1538.8	3.44	6.82	1851.2	1731.9	1805.7	1707.4	1838.4	1886.4	1855.5	1799.8	1651.9	1464.6	1602.8	1404.4	1603.1	1460.5	1691.5	1477.3	1	Methylthio [C61; C321]
TGGT1_203840	High	IsMasterProtein	TGGT1_203840-t26_1-p1	transcript=TGGT1_203840-t26_1 | gene=TGGT1_203840 | organism=Toxoplasma_gondii_GT1 | gene_product=DEAD/DEAH box helicase domain-containing protein [Source:UniProtKB/TrEMBL;Acc:S7UUC2] | transcript_product=DEAD/DEAH box helicase domain-containing protein | location=TGGT1_chrVIIa:2081575-2088888(+) | protein_length=1825 | sequence_SO=chromosome | SO=protein_coding_gene | is_pseudo=false	0	11.334	3	3	3	3	1825	198.4	8.4	7.91	3	1.185	0.24	0.553075	26.4	22.3	18.35	11.26	18.7	26.6	30.4	21.2	19.3	26.2	29.1	28.2	21.2	22.2	26.3	24.4	22.4	19.7	27.2	21.6	1
TGGT1_222160	High	IsMasterProtein	TGGT1_222160-t26_1-p1	transcript=TGGT1_222160-t26_1 | gene=TGGT1_222160 | organism=Toxoplasma_gondii_GT1 | gene_product=Aldedh domain-containing protein [Source:UniProtKB/TrEMBL;Acc:S7VZX7] | transcript_product=aldehyde dehydrogenase | location=TGGT1_chrII:900932-907660(-) | protein_length=497 | sequence_SO=chromosome | SO=protein_coding_gene | is_pseudo=false	0	32.482	19	8	16	8	497	53.7	6.39	46.29	8	1.185	0.24	6.60062e-06	1729.9	1460.2	2.99	3.68	1663.7	1680.3	1737.6	1722.2	1766.5	1773.5	1776.9	1647.8	1552.9	1434.4	1475.3	1445.2	1485	1377.4	1506.4	1428.4	1	Methylthio [C39]
TGGT1_234640	High	IsMasterProtein	TGGT1_234640-t26_1-p1	transcript=TGGT1_234640-t26_1 | gene=TGGT1_234640 | organism=Toxoplasma_gondii_GT1 | gene_product=Not3 domain-containing protein [Source:UniProtKB/TrEMBL;Acc:S7W4I1] | transcript_product=hypothetical protein | location=TGGT1_chrX:4400226-4410048(+) | protein_length=1761 | sequence_SO=chromosome | SO=protein_coding_gene | is_pseudo=false	0.002	4.964	2	3	3	3	1761	184.5	6.87	3.42	3	1.169	0.23	0.0018551	132.7	113.5	7.65	5.71	133.4	119	149.3	130.2	146.2	132.1	136.2	123.8	116.2	117.3	122.5	109	110.9	103	117.1	107.3	1
TGGT1_260030	High	IsMasterProtein	TGGT1_260030-t26_1-p1	transcript=TGGT1_260030-t26_1 | gene=TGGT1_260030 | organism=Toxoplasma_gondii_GT1 | gene_product=Protein kinase domain-containing protein [Source:UniProtKB/TrEMBL;Acc:S7W765] | transcript_product=atypical MEK-related kinase (incomplete catalytic triad) | location=TGGT1_chrVIIb:2488342-2495420(-) | protein_length=814 | sequence_SO=chromosome | SO=protein_coding_gene | is_pseudo=false	0.003	4.244	2	2	2	2	814	88.5	5.91	2.09	2	1.169	0.23	0.0109484	128.3	109.7	14.54	7.21	141.9	134.1	122.7	119.6	174	115.4	146.6	120.8	107.1	114.3	112.5	91.1	112.5	113.1	106.6	102.8	1
TGGT1_250800	High	IsMasterProtein	TGGT1_250800-t26_1-p1	transcript=TGGT1_250800-t26_1 | gene=TGGT1_250800 | organism=Toxoplasma_gondii_GT1 | gene_product=AP2 domain transcription factor AP2XII-8 [Source:UniProtKB/TrEMBL;Acc:S7W8S6] | transcript_product=AP2 domain transcription factor AP2XII-8 | location=TGGT1_chrXII:5155557-5161328(-) | protein_length=1679 | sequence_SO=chromosome | SO=protein_coding_gene | is_pseudo=false	0	41.971	10	12	12	12	1679	165.5	7.27	35.26	12	1.17	0.23	0.000474478	531.9	454.5	3.26	5.39	554.1	541.2	538.4	522.1	528.7	498	516.1	535.2	445.8	465.2	444.9	483.8	426.3	453.5	455.4	505.6	1
TGGT1_290190	Medium	IsMasterProtein	TGGT1_290190-t26_1-p1	transcript=TGGT1_290190-t26_1 | gene=TGGT1_290190 | organism=Toxoplasma_gondii_GT1 | gene_product=hypothetical protein | transcript_product=hypothetical protein | location=TGGT1_chrIX:3443332-3445689(-) | protein_length=785 | sequence_SO=chromosome | SO=protein_coding_gene | is_pseudo=false	0.038	1.566	1	1	1	1	785	86.1	9.79	0	1	1.17	0.23	0.12097	42.1	36	11.69	11.9	43	45.2	35	41.8	39.7	42.4	31.7	44.3	32.5	36.2	36.8	37.7	29.9	43.7	35.8	32.2	1
TGGT1_274100	High	IsMasterProtein	TGGT1_274100-t26_1-p1	transcript=TGGT1_274100-t26_1 | gene=TGGT1_274100 | organism=Toxoplasma_gondii_GT1 | gene_product=hypothetical protein | transcript_product=hypothetical protein | location=TGGT1_chrVIII:3026268-3028549(-) | protein_length=511 | sequence_SO=chromosome | SO=protein_coding_gene | is_pseudo=false	0.003	4.138	3	2	2	2	511	56.7	9.35	4.22	2	1.171	0.23	0.00314908	210.8	180	5.17	6.93	211.4	212.9	191.3	209.2	216.3	210.2	215.5	188.9	183.2	175.6	178	204.4	159.3	174.8	182	182	1
TGGT1_305120	High	IsMasterProtein	TGGT1_305120-t26_1-p1	transcript=TGGT1_305120-t26_1 | gene=TGGT1_305120 | organism=Toxoplasma_gondii_GT1 | gene_product=Transporter, solute:sodium symporter (SSS) family protein [Source:UniProtKB/TrEMBL;Acc:A0A125YUD3] | transcript_product=transporter, solute:sodium symporter (SSS) family protein | location=TGGT1_chrIX:5005843-5007468(+) | protein_length=541 | sequence_SO=chromosome | SO=protein_coding_gene | is_pseud…	0.003	3.974	3	1	1	1	541	58.1	5.88	4.21	1	1.171	0.23	0.778342	16.7	14.2	20.84	24.1	8.5	17.1	16.5	18.5	17	15.3	13.1	16.8	18.7	12.1	13.6	16.6	8.3	14.2	19	14.2	1
TGGT1_208070	High	IsMasterProtein	TGGT1_208070-t26_1-p1	transcript=TGGT1_208070-t26_1 | gene=TGGT1_208070 | organism=Toxoplasma_gondii_GT1 | gene_product=Kinase [Source:UniProtKB/TrEMBL;Acc:S7UIU8] | transcript_product=inositol polyphosphate kinase | location=TGGT1_chrIb:592752-603778(-) | protein_length=2851 | sequence_SO=chromosome | SO=protein_coding_gene | is_pseudo=false	0	12.723	2	6	6	5	2851	305.8	7.33	11.32	6	1.172	0.23	0.00253741	297	253.3	7.44	5.06	330.6	297.7	326.1	283	306.2	287.8	296.2	263.1	275.8	249.8	250.2	271.5	240.5	241.5	260.1	256.5	1
TGGT1_231030	High	IsMasterProtein	TGGT1_231030-t26_1-p1	transcript=TGGT1_231030-t26_1 | gene=TGGT1_231030 | organism=Toxoplasma_gondii_GT1 | gene_product=hypothetical protein | transcript_product=hypothetical protein | location=TGGT1_chrVIII:1199756-1202335(-) | protein_length=859 | sequence_SO=chromosome | SO=protein_coding_gene | is_pseudo=false	0.006	3.011	1	1	1	1	859	95.5	8.48	2.65	1	1.173	0.23	0.015096	33.4	28.5	10.37	9.6	34.2	32.8	32.3	34	30.4	41.9	35.4	31.4	33.2	26.9	24.9	30.7	30.7	30	26.8	27.1	1
TGGT1_261670	High	IsMasterProtein	TGGT1_261670-t26_1-p1	transcript=TGGT1_261670-t26_1 | gene=TGGT1_261670 | organism=Toxoplasma_gondii_GT1 | gene_product=Ribonuclease H1/H2 small subunit protein [Source:UniProtKB/TrEMBL;Acc:S7WE97] | transcript_product=ribonuclease H1/H2 small subunit protein | location=TGGT1_chrVIIb:1570202-1572358(+) | protein_length=434 | sequence_SO=chromosome | SO=protein_coding_gene | is_pseudo=false	0.001	7.209	7	2	4	2	434	46	5.49	6.91	2	1.174	0.23	0.0207125	123.1	104.9	8.37	7.22	125.2	121.1	125.8	103	137.1	118	126.6	113.3	115.1	117.5	105.6	110.9	94.3	104.2	101.1	102.3	1
TGGT1_283540	High	IsMasterProtein	TGGT1_283540-t26_1-p1	transcript=TGGT1_283540-t26_1 | gene=TGGT1_283540 | organism=Toxoplasma_gondii_GT1 | gene_product=hypothetical protein | transcript_product=hypothetical protein | location=TGGT1_chrV:2924949-2926408(-) | protein_length=376 | sequence_SO=chromosome | SO=protein_coding_gene | is_pseudo=false	0	26.796	29	10	19	10	376	41.9	8.02	37.35	10	1.174	0.23	2.57862e-08	3381.7	2881	1.75	2.05	3449.5	3361.4	3280.4	3386.8	3320.7	3398.4	3376.5	3454.1	2846.8	2925.7	2907.7	2780.1	2911.8	2877.2	2884.7	2773.7	1	Methylthio [C111]
TGGT1_297140	High	IsMasterProtein	TGGT1_297140-t26_1-p1	transcript=TGGT1_297140-t26_1 | gene=TGGT1_297140 | organism=Toxoplasma_gondii_GT1 | gene_product=U6 snRNA-associated Sm-like protein LSm2 [Source:UniProtKB/TrEMBL;Acc:S7UK25] | transcript_product=putative U6 snRNA-associated sm family protein Lsm2 | location=TGGT1_chrII:1541219-1542559(+) | protein_length=101 | sequence_SO=chromosome | SO=protein_coding_gene | is_pseudo=false	0.001	5.105	21	2	4	2	101	11.6	7.91	7.24	2	1.174	0.23	0.00121875	277.7	236.6	8.39	5.73	273.6	269.1	292.8	282	327.7	260.4	304.5	258.3	232.3	227.5	252.3	235.9	237.5	205.8	237.3	241.4	1
TGGT1_318390	High	IsMasterProtein	TGGT1_318390-t26_1-p1	transcript=TGGT1_318390-t26_1 | gene=TGGT1_318390 | organism=Toxoplasma_gondii_GT1 | gene_product=hypothetical protein | transcript_product=hypothetical protein | location=TGGT1_chrIV:1317932-1322384(+) | protein_length=1278 | sequence_SO=chromosome | SO=protein_coding_gene | is_pseudo=false	0.001	5.151	2	2	2	2	1278	137.9	5.9	2.49	2	1.174	0.23	0.00375578	77.9	66.3	10.08	6.94	70.6	86.8	78.1	91.3	80.8	68.9	77.6	71.9	60.4	55.2	67.6	67.7	66.2	67.2	66.4	62.9	1
TGGT1_213580	Low	IsMasterProtein	TGGT1_213580-t26_1-p1	transcript=TGGT1_213580-t26_1 | gene=TGGT1_213580 | organism=Toxoplasma_gondii_GT1 | gene_product=hypothetical protein | transcript_product=hypothetical protein | location=TGGT1_chrV:1023791-1024852(+) | protein_length=114 | sequence_SO=chromosome | SO=protein_coding_gene | is_pseudo=false	0.053	1.384	13	1	1	1	114	12.9	7.81	0	1	1.175	0.23	0.352239	7.6	6.4	20.53	35.96	5.6	6.3	8	7.4	7.8	9.5	7.7	5	8.5	5.8	6	8.2	6.9	2.5	3.3	7.2	1
TGGT1_220230A	High	IsMasterProtein	TGGT1_220230A-t26_1-p1	transcript=TGGT1_220230A-t26_1 | gene=TGGT1_220230A | organism=Toxoplasma_gondii_GT1 | gene_product=Leucine rich repeat-containing protein [Source:UniProtKB/TrEMBL;Acc:S7VVC3] | transcript_product=leucine rich repeat-containing protein | location=TGGT1_chrV:129639-135841(-) | protein_length=912 | sequence_SO=chromosome | SO=protein_coding_gene | is_pseudo=false	0	9.682	3	2	3	2	912	97.2	5.94	5.28	2	1.175	0.23	0.00197067	54.3	46.2	8.55	5.29	62.9	55.3	62	49.8	59.7	53.4	52.6	53.3	43.9	44.8	45.3	51.6	46.9	45.8	48.9	46.7	1
TGGT1_315310	High	IsMasterProtein	TGGT1_315310-t26_1-p1	transcript=TGGT1_315310-t26_1 | gene=TGGT1_315310 | organism=Toxoplasma_gondii_GT1 | gene_product=hypothetical protein | transcript_product=hypothetical protein | location=TGGT1_chrXI:4589302-4593414(-) | protein_length=658 | sequence_SO=chromosome | SO=protein_coding_gene | is_pseudo=false	0.009	2.88	3	2	2	2	658	72.5	9.54	3.35	2	1.175	0.23	0.0794033	81.6	69.4	10.06	6.31	71.9	82.5	83.2	87.4	63.4	86.1	80.2	80.7	80.1	68	68.4	72.5	68.5	66.7	74.8	70.3	1
TGGT1_270650	High	IsMasterProtein	TGGT1_270650-t26_1-p1	transcript=TGGT1_270650-t26_1 | gene=TGGT1_270650 | organism=Toxoplasma_gondii_GT1 | gene_product=Deoxyribose-phosphate aldolase [Source:UniProtKB/TrEMBL;Acc:A0A125YLW1] | transcript_product=deoxyribose-phosphate aldolase | location=TGGT1_chrVIII:5104346-5105673(-) | protein_length=262 | sequence_SO=chromosome | SO=protein_coding_gene | is_pseudo=false	0	8.878	10	3	3	3	262	27.8	6.28	7.4	3	1.176	0.23	6.33137e-06	533.6	453.9	3.71	3.11	498.9	526.3	564.6	527.5	552	541.3	525.1	539.8	432.4	455.3	441.6	468	460.3	452.6	437.5	470.8	1
TGGT1_281450	High	IsMasterProtein	TGGT1_281450-t26_1-p1	transcript=TGGT1_281450-t26_1 | gene=TGGT1_281450 | organism=Toxoplasma_gondii_GT1 | gene_product=Protein kinase domain-containing protein [Source:UniProtKB/TrEMBL;Acc:S7W4A7] | transcript_product=putative cell-cycle-associated protein kinase | location=TGGT1_chrVIIa:4031106-4036921(+) | protein_length=451 | sequence_SO=chromosome | SO=protein_coding_gene | is_pseudo=false	0.003	4.817	4	2	2	2	451	49.9	9.16	4.5	2	1.176	0.23	0.071181	75.8	64.5	14.45	7.13	83.6	70.8	81.4	60.3	86.5	61.8	81.3	64.4	58.3	66.4	64.2	61.8	68.9	65.4	64.8	55.2	1
TGGT1_233130	High	IsMasterProtein	TGGT1_233130-t26_1-p1	transcript=TGGT1_233130-t26_1 | gene=TGGT1_233130 | organism=Toxoplasma_gondii_GT1 | gene_product=Nucleoside transporter protein [Source:UniProtKB/TrEMBL;Acc:S7WC20] | transcript_product=nucleoside transporter protein | location=TGGT1_chrVIII:2439585-2441599(+) | protein_length=531 | sequence_SO=chromosome | SO=protein_coding_gene | is_pseudo=false	0.001	7.551	3	3	3	3	531	57.5	6.71	8.21	3	1.161	0.22	0.00185405	395.2	340.3	5.66	4.95	403.7	394.8	425.6	395	395.5	357.4	396.1	361.5	347.9	337.6	332.5	354.9	317.1	336.6	343.1	374.6	1
TGGT1_249340	High	IsMasterProtein	TGGT1_249340-t26_1-p1	transcript=TGGT1_249340-t26_1 | gene=TGGT1_249340 | organism=Toxoplasma_gondii_GT1 | gene_product=hypothetical protein | transcript_product=hypothetical protein | location=TGGT1_chrXII:4401187-4404317(-) | protein_length=937 | sequence_SO=chromosome | SO=protein_coding_gene | is_pseudo=false	0.004	3.661	2	1	1	1	937	100	6.87	2.91	1	1.161	0.22	0.30782	16.7	14.4	21.75	15.86	12.5	18.4	16.8	16.7	12	19.5	14.8	22.9	10.8	14.1	17.3	14.7	12.2	13.7	15.7	17.2	1
TGGT1_263140	High	IsMasterProtein	TGGT1_263140-t26_1-p1	transcript=TGGT1_263140-t26_1 | gene=TGGT1_263140 | organism=Toxoplasma_gondii_GT1 | gene_product=SWI2/SNF2-containing protein RAD26 [Source:UniProtKB/TrEMBL;Acc:S7UXK9] | transcript_product=SWI2/SNF2-containing protein RAD26 | location=TGGT1_chrVIIb:738637-750864(-) | protein_length=1596 | sequence_SO=chromosome | SO=protein_coding_gene | is_pseudo=false	0	9.516	3	3	3	3	1596	175.7	6.83	7.6	3	1.161	0.22	0.0426212	55.1	47.5	14.01	12.73	54.1	47.2	69.7	64.3	56.1	59.1	49.5	49.4	54.9	43.8	50.9	43.6	47.8	48.2	35	47.1	1
TGGT1_305160	High	IsMasterProtein	TGGT1_305160-t26_1-p1	transcript=TGGT1_305160-t26_1 | gene=TGGT1_305160 | organism=Toxoplasma_gondii_GT1 | gene_product=Histone H2B [Source:UniProtKB/TrEMBL;Acc:A0A125YHE1] | transcript_product=histone H2Ba | location=TGGT1_chrIX:5039074-5039424(+) | protein_length=116 | sequence_SO=chromosome | SO=protein_coding_gene | is_pseudo=false	0	47.959	59	10	73	2	116	12.6	10.1	201.32	10	1.161	0.22	0.000407347	2170.7	1869	4.86	3.79	2210.9	1996.6	2213.6	2131.2	2215.7	2063.7	2298.1	2045.5	1851.6	1959.4	1886.5	1833.9	1977.4	1783.7	1917.7	1802.6	1
TGGT1_214830	High	IsMasterProtein	TGGT1_214830-t26_1-p1	transcript=TGGT1_214830-t26_1 | gene=TGGT1_214830 | organism=Toxoplasma_gondii_GT1 | gene_product=Exportin-T [Source:UniProtKB/TrEMBL;Acc:S7VZE0] | transcript_product=hypothetical protein | location=TGGT1_chrX:6407759-6417959(+) | protein_length=1511 | sequence_SO=chromosome | SO=protein_coding_gene | is_pseudo=false	0	11.747	3	4	5	4	1511	163.9	6.28	4.9	4	1.162	0.22	0.044365	91.2	78.4	11.59	9.84	98	82.1	112	85	101	90.1	92.3	80.1	88.9	94.1	80.2	71.7	77.3	73.5	79.6	74.1	1
TGGT1_224820	Medium	IsMasterProtein	TGGT1_224820-t26_1-p1	transcript=TGGT1_224820-t26_1 | gene=TGGT1_224820 | organism=Toxoplasma_gondii_GT1 | gene_product=hypothetical protein | transcript_product=hypothetical protein | location=TGGT1_chrX:2719509-2720531(+) | protein_length=340 | sequence_SO=chromosome | SO=protein_coding_gene | is_pseudo=false	0.023	1.834	2	1	1	1	340	36.5	8.75	1.96	1	1.162	0.22	0.00137021	230.3	198.2	3.68	6.9	250.7	224.2	227.9	230.7	234.8	231.5	230	223.8	217.4	198.7	188.6	197.6	187.1	200.1	218.9	180.8	1
TGGT1_268960	Medium	IsMasterProtein	TGGT1_268960-t26_1-p1	transcript=TGGT1_268960-t26_1 | gene=TGGT1_268960 | organism=Toxoplasma_gondii_GT1 | gene_product=AMPK1_CBM domain-containing protein [Source:UniProtKB/TrEMBL;Acc:S7WKW0] | transcript_product=putative 5'-AMP-activated protein kinase subunit beta-1 family protein | location=TGGT1_chrVIII:6176227-6181218(-) | protein_length=387 | sequence_SO=chromosome | SO=protein_coding_gene | is_pseudo=false	0.039	1.555	2	1	1	1	387	41.5	5.26	2.27	1	1.162	0.22	0.459955	22.3	19.2	15.65	12.27	17.8	24.6	19.4	24.7	17.1	26.4	22.6	22	21.9	19.6	18.5	21.5	25.1	18.4	18.9	17.8	1
TGGT1_203880	High	IsMasterProtein	TGGT1_203880-t26_1-p1	transcript=TGGT1_203880-t26_1 | gene=TGGT1_203880 | organism=Toxoplasma_gondii_GT1 | gene_product=hypothetical protein | transcript_product=hypothetical protein | location=TGGT1_chrVIIa:2058415-2067672(-) | protein_length=1559 | sequence_SO=chromosome | SO=protein_coding_gene | is_pseudo=false	0	9.413	3	5	5	5	1559	172.8	7.08	4.22	5	1.163	0.22	0.0011283	242.6	208.5	2.91	6.71	239.8	256.7	243.1	242	240.3	241.3	251.7	255.8	215.7	204.7	210.2	222	178.9	206.9	206.6	223.9	1
TGGT1_246530	High	IsMasterProtein	TGGT1_246530-t26_1-p1	transcript=TGGT1_246530-t26_1 | gene=TGGT1_246530 | organism=Toxoplasma_gondii_GT1 | gene_product=CDP-diacylglycerol--glycerol-3-phosphate 3-phosphatidyltransferase [Source:UniProtKB/TrEMBL;Acc:S7V174] | transcript_product=phospholipase D active site domain-containing protein | location=TGGT1_chrXII:2765502-2768047(+) | protein_length=826 | sequence_SO=chromosome | SO=protein_coding_gene | is_pse…	0.002	5.022	3	2	2	2	826	88.4	6.64	5.01	2	1.163	0.22	0.0171748	116.2	99.9	7.6	8.81	107.4	109.7	116.5	101.6	121.8	115.9	129.5	118	90.1	90.3	96.3	115.7	105.2	103.7	95	105.2	1
TGGT1_254610	High	IsMasterProtein	TGGT1_254610-t26_1-p1	transcript=TGGT1_254610-t26_1 | gene=TGGT1_254610 | organism=Toxoplasma_gondii_GT1 | gene_product=Mitochondrial import inner membrane translocase subunit [Source:UniProtKB/TrEMBL;Acc:S7UMY1] | transcript_product=Tim10/DDP family zinc finger superfamily protein | location=TGGT1_chrIII:1837560-1838967(-) | protein_length=91 | sequence_SO=chromosome | SO=protein_coding_gene | is_pseudo=false	0.001	7.498	14	1	2	1	91	10.2	5.4	6.72	1	1.163	0.22	0.721599	181.8	156.3	21.36	25.08	161.4	220.5	135.3	209.2	144.1	134.1	216.3	204.7	129.5	225.6	135.2	170.3	143.4	186.9	126.5	230.8	1
TGGT1_262490	Medium	IsMasterProtein	TGGT1_262490-t26_1-p1	transcript=TGGT1_262490-t26_1 | gene=TGGT1_262490 | organism=Toxoplasma_gondii_GT1 | gene_product=AB hydrolase-1 domain-containing protein [Source:UniProtKB/TrEMBL;Acc:S7UYC4] | transcript_product=putative alpha/beta hydrolase | location=TGGT1_chrVIIb:1184618-1187285(-) | protein_length=260 | sequence_SO=chromosome | SO=protein_coding_gene | is_pseudo=false	0.022	1.875	3	1	1	1	260	29.1	8.65	1.91	1	1.163	0.22	0.151155	38.8	33.4	13.19	7.43	40.2	34.9	25.7	38.4	35.9	39.4	40.1	39.3	31.2	33.7	30.6	34.2	33	34.9	27.7	33.9	1
TGGT1_216780	High	IsMasterProtein	TGGT1_216780-t26_1-p1	transcript=TGGT1_216780-t26_1 | gene=TGGT1_216780 | organism=Toxoplasma_gondii_GT1 | gene_product=hypothetical protein | transcript_product=hypothetical protein | location=TGGT1_chrXI:5809251-5816728(+) | protein_length=1003 | sequence_SO=chromosome | SO=protein_coding_gene | is_pseudo=false	0	8.787	4	3	3	3	1003	105.2	5.05	4.7	3	1.164	0.22	0.0263002	61.8	53.1	7.96	10.07	58.7	63.7	67	56.4	65	55.4	68.4	59.8	54	49.6	53	65.5	51	57	53.1	48	1
TGGT1_258720	High	IsMasterProtein	TGGT1_258720-t26_1-p1	transcript=TGGT1_258720-t26_1 | gene=TGGT1_258720 | organism=Toxoplasma_gondii_GT1 | gene_product=Ubiquitin-like domain-containing protein [Source:UniProtKB/TrEMBL;Acc:A0A125YUU1] | transcript_product=putative Ubiquitin family protein | location=TGGT1_chrVIIb:3191777-3192567(+) | protein_length=73 | sequence_SO=chromosome | SO=protein_coding_gene | is_pseudo=false	0.001	5.084	21	2	2	2	73	8.6	7.28	5.16	2	1.164	0.22	0.00374312	325.2	279.4	6.68	3.21	333.5	304.4	331.4	303.7	350.3	319	342.5	288.4	302.2	286.3	272.9	276.7	279.9	277.5	282.9	279	1
TGGT1_281610	High	IsMasterProtein	TGGT1_281610-t26_1-p1	transcript=TGGT1_281610-t26_1 | gene=TGGT1_281610 | organism=Toxoplasma_gondii_GT1 | gene_product=hypothetical protein | transcript_product=hypothetical protein | location=TGGT1_chrVIIa:4122946-4124326(+) | protein_length=293 | sequence_SO=chromosome | SO=protein_coding_gene | is_pseudo=false	0.003	3.769	4	1	1	1	293	32.7	9.86	3.63	1	1.164	0.22	0.639718	36.1	31	10.78	14.74	38.1	37.7	36.7	35.8	30.2	36.4	28.4	31.7	29.6	29.8	30.9	38.5	33	28.8	31.1	42.4	1
TGGT1_230070	High	IsMasterProtein	TGGT1_230070-t26_1-p1	transcript=TGGT1_230070-t26_1 | gene=TGGT1_230070 | organism=Toxoplasma_gondii_GT1 | gene_product=BolA family protein [Source:UniProtKB/TrEMBL;Acc:S7WBE0] | transcript_product=BolA family protein | location=TGGT1_chrVIII:570537-570812(-) | protein_length=91 | sequence_SO=chromosome | SO=protein_coding_gene | is_pseudo=false	0.001	5.253	9	1	3	1	91	10	7.3	7.38	1	1.165	0.22	0.00167158	206.3	177.1	6.59	4.52	206	206.5	218.4	217.2	216.2	182	192.3	193.7	162	183	169.6	185.8	180.5	171.3	174.1	180.1	1
TGGT1_208030	High	IsMasterProtein	TGGT1_208030-t26_1-p1	transcript=TGGT1_208030-t26_1 | gene=TGGT1_208030 | organism=Toxoplasma_gondii_GT1 | gene_product=Microneme protein MIC4 [Source:UniProtKB/TrEMBL;Acc:A0A125YP10] | transcript_product=microneme protein MIC4 | location=TGGT1_chrIb:547335-549077(+) | protein_length=580 | sequence_SO=chromosome | SO=protein_coding_gene | is_pseudo=false	0	54.869	21	13	50	13	580	63	5.22	114.59	13	1.166	0.22	7.91512e-05	7872.1	6749.5	3.83	4.51	8074	7558.6	7776.9	7602.9	8235.3	7702.1	8389.3	7968.4	7021.1	6736.2	7031.6	6300.8	7228.1	6762.9	6695.7	6471.9	1	Methylthio [C68; C103; C214; C380; C466]
TGGT1_213060	High	IsMasterProtein	TGGT1_213060-t26_1-p1	transcript=TGGT1_213060-t26_1 | gene=TGGT1_213060 | organism=Toxoplasma_gondii_GT1 | gene_product=WD_REPEATS_REGION domain-containing protein [Source:UniProtKB/TrEMBL;Acc:S7UP51] | transcript_product=WD domain, G-beta repeat-containing protein | location=TGGT1_chrV:694020-707306(+) | protein_length=3089 | sequence_SO=chromosome | SO=protein_coding_gene | is_pseudo=false	0	14.57	3	5	6	5	3089	328.1	7.15	12.86	5	1.166	0.22	0.0101862	86.8	74.5	8.06	8.66	91.1	81.8	91.5	90.4	89.1	83.5	84.7	71	63.5	69.4	74	82	75.9	74.9	65.1	77.1	1
TGGT1_263080	High	IsMasterProtein	TGGT1_263080-t26_1-p1	transcript=TGGT1_263080-t26_1 | gene=TGGT1_263080 | organism=Toxoplasma_gondii_GT1 | gene_product=hypothetical protein | transcript_product=hypothetical protein | location=TGGT1_chrVIIb:796791-797192(+) | protein_length=133 | sequence_SO=chromosome | SO=protein_coding_gene | is_pseudo=false	0.001	7.532	27	3	4	3	133	14.4	9.13	8.45	3	1.166	0.22	0.0102362	496.2	425.6	6.88	5.77	509.1	453.1	513.1	459.8	510.5	487.4	505.2	424.4	442.2	398	462.4	418.7	456.9	405	432.6	405.4	1
TGGT1_232030	High	IsMasterProtein	TGGT1_232030-t26_1-p1	transcript=TGGT1_232030-t26_1 | gene=TGGT1_232030 | organism=Toxoplasma_gondii_GT1 | gene_product=hypothetical protein | transcript_product=hypothetical protein | location=TGGT1_chrVIII:1768528-1771709(+) | protein_length=208 | sequence_SO=chromosome | SO=protein_coding_gene | is_pseudo=false	0	29.734	39	6	23	6	208	23.4	5.45	65.79	6	1.167	0.22	0.385959	1123.8	963.1	14.89	11.87	1207.9	1296.8	1131.3	1173.8	1039.6	749	1050.1	1116.3	884.6	958.3	899.3	1084.1	891.5	1119.4	968	1198.7	1
TGGT1_278550	High	IsMasterProtein	TGGT1_278550-t26_1-p1	transcript=TGGT1_278550-t26_1 | gene=TGGT1_278550 | organism=Toxoplasma_gondii_GT1 | gene_product=Tr-type G domain-containing protein [Source:UniProtKB/TrEMBL;Acc:S7W8D2] | transcript_product=elongation factor Tu GTP binding domain-containing protein | location=TGGT1_chrXII:5935975-5947314(-) | protein_length=2560 | sequence_SO=chromosome | SO=protein_coding_gene | is_pseudo=false	0.001	5.112	1	2	2	2	2560	275	7.55	2.85	2	1.167	0.22	0.490808	10.9	9.4	19.89	23.32	8.7	10.1	7.7	11.9	12.7	9.7	13.5	13.1	9.4	7.9	12	14.4	8.1	10.2	7.7	9.3	1
TGGT1_312670	High	IsMasterProtein	TGGT1_312670-t26_1-p1	transcript=TGGT1_312670-t26_1 | gene=TGGT1_312670 | organism=Toxoplasma_gondii_GT1 | gene_product=hypothetical protein | transcript_product=hypothetical protein | location=TGGT1_chrXI:2857960-2861467(-) | protein_length=636 | sequence_SO=chromosome | SO=protein_coding_gene | is_pseudo=false	0.001	6.131	3	2	4	2	636	67	7.11	11.44	2	1.167	0.22	0.46834	22	18.8	11.77	19.19	17.9	18.1	24.3	22	24.8	22.8	21	22	18.3	17.3	16	25.1	22.3	19.4	16.7	26	1
TGGT1_314020	High	IsMasterProtein	TGGT1_314020-t26_1-p1	transcript=TGGT1_314020-t26_1 | gene=TGGT1_314020 | organism=Toxoplasma_gondii_GT1 | gene_product=hypothetical protein | transcript_product=hypothetical protein | location=TGGT1_chrXI:3840878-3848889(-) | protein_length=1386 | sequence_SO=chromosome | SO=protein_coding_gene | is_pseudo=false	0	21.992	6	8	9	8	1386	151.7	6.95	21.93	8	1.167	0.22	0.151295	873	748.3	19.78	4.18	725.6	1084.3	746.5	1074.9	729.9	1032.3	704.8	1020.8	719.8	765.3	781.4	749.2	726.4	726.2	811.4	747.5	1
TGGT1_294390	Medium	IsMasterProtein	TGGT1_294390-t26_1-p1	transcript=TGGT1_294390-t26_1 | gene=TGGT1_294390 | organism=Toxoplasma_gondii_GT1 | gene_product=Putative myosin light chain MLC4 [Source:UniProtKB/TrEMBL;Acc:S7VR42] | transcript_product=putative myosin light chain MLC4 | location=TGGT1_chrIa:859360-862302(-) | protein_length=172 | sequence_SO=chromosome | SO=protein_coding_gene | is_pseudo=false	0.017	2.105	3	1	1	1	172	19.7	8.07	2.05	1	1.168	0.22	0.041536	66.4	56.9	14.01	13.28	73.4	62.4	70.8	61.8	82.6	58.5	81.2	59.7	58.6	48.1	55.2	59.9	46.8	52.9	68.3	64.5	1
TGGT1_297840	High	IsMasterProtein	TGGT1_297840-t26_1-p1	transcript=TGGT1_297840-t26_1 | gene=TGGT1_297840 | organism=Toxoplasma_gondii_GT1 | gene_product=DNA primase, large subunit [Source:UniProtKB/TrEMBL;Acc:S7UKT0] | transcript_product=DNA primase, large subunit | location=TGGT1_chrII:2038694-2050603(-) | protein_length=584 | sequence_SO=chromosome | SO=protein_coding_gene | is_pseudo=false	0	8.525	6	4	4	4	584	66.1	8.21	8.62	4	1.168	0.22	0.00622506	132.9	113.8	7.38	7.75	131.4	131.9	126.4	133.8	117.2	149.2	143.7	136.3	108	114.6	115	133.1	103.9	111.4	121.2	112.9	1
TGGT1_310720A	High	IsMasterProtein	TGGT1_310720A-t26_1-p1	transcript=TGGT1_310720A-t26_1 | gene=TGGT1_310720A | organism=Toxoplasma_gondii_GT1 | gene_product=hypothetical protein | transcript_product=hypothetical protein | location=TGGT1_chrXI:1507142-1510268(-) | protein_length=858 | sequence_SO=chromosome | SO=protein_coding_gene | is_pseudo=false	0	8.109	4	3	3	3	858	91.6	7.77	6.76	3	1.168	0.22	0.00499364	126.7	108.5	6.98	6.71	114.2	132.3	137.9	115.8	117.7	125.8	127.7	132.4	101.5	117.9	109.3	115.7	107.6	114.6	104.5	97.3	1
TGGT1_319870	High	IsMasterProtein	TGGT1_319870-t26_1-p1	transcript=TGGT1_319870-t26_1 | gene=TGGT1_319870 | organism=Toxoplasma_gondii_GT1 | gene_product=UBIQUITIN_CONJUGAT_2 domain-containing protein [Source:UniProtKB/TrEMBL;Acc:S7UK71] | transcript_product=ubiquitin-conjugating enzyme subfamily protein | location=TGGT1_chrIV:656858-661140(-) | protein_length=311 | sequence_SO=chromosome | SO=protein_coding_gene | is_pseudo=false	0	8.652	8	3	7	3	311	35	10.02	10.43	3	1.168	0.22	0.0150512	683.2	584.7	8.87	5.92	716.8	603	733.3	591.6	710	657.4	728.1	617.9	619.4	573.7	609.6	542.9	595.8	559.8	627	538.5	1
TGGT1_310290	High	IsMasterProtein	TGGT1_310290-t26_1-p1	transcript=TGGT1_310290-t26_1 | gene=TGGT1_310290 | organism=Toxoplasma_gondii_GT1 | gene_product=Regulator of chromosome condensation (RCC1) repeat-containing protein [Source:UniProtKB/TrEMBL;Acc:S7US89] | transcript_product=regulator of chromosome condensation (RCC1) repeat-containing protein | location=TGGT1_chrXI:1194540-1202441(-) | protein_length=759 | sequence_SO=chromosome | SO=protein_co…	0	12.12	8	4	4	4	759	80.3	8.69	11.67	4	1.169	0.22	0.043945	134.2	114.8	10	6.93	119.6	138.8	136.3	143.7	109.4	132.1	113	136.7	120.3	103	114	125.3	109.2	103.2	115.6	116.5	1
TGGT1_246800	High	IsMasterProtein	TGGT1_246800-t26_1-p1	transcript=TGGT1_246800-t26_1 | gene=TGGT1_246800 | organism=Toxoplasma_gondii_GT1 | gene_product=Peptidase_S9 domain-containing protein [Source:UniProtKB/TrEMBL;Acc:S7V0V7] | transcript_product=putative acylaminoacyl-peptidase | location=TGGT1_chrXII:2932607-2944230(+) | protein_length=851 | sequence_SO=chromosome | SO=protein_coding_gene | is_pseudo=false	0.003	4.388	2	2	2	2	851	92.6	6.54	4.62	2	1.153	0.21	0.147376	63.3	54.9	12.93	11.56	78.4	66.2	65.9	54	60.8	55.9	67.4	55.7	50.2	56.6	61.7	50.5	68.6	56.7	53.3	50.6	1
TGGT1_236920	High	IsMasterProtein	TGGT1_236920-t26_1-p1	transcript=TGGT1_236920-t26_1 | gene=TGGT1_236920 | organism=Toxoplasma_gondii_GT1 | gene_product=hypothetical protein | transcript_product=hypothetical protein | location=TGGT1_chrX:5464535-5465738(+) | protein_length=111 | sequence_SO=chromosome | SO=protein_coding_gene | is_pseudo=false	0.001	6.27	14	2	6	2	111	12.2	4.12	18.75	2	1.154	0.21	0.737179	547.4	474.4	37.4	35	508.9	692.8	342.8	746.2	388.3	207.1	707.6	589	248.5	665.7	261.4	452.8	547.2	497.1	371.4	661.8	1
TGGT1_249910	Medium	IsMasterProtein	TGGT1_249910-t26_1-p1	transcript=TGGT1_249910-t26_1 | gene=TGGT1_249910 | organism=Toxoplasma_gondii_GT1 | gene_product=Putative mitochondria-associated granulocyte macrophage CSF signaling molecule [Source:UniProtKB/TrEMBL;Acc:A0A125YFU1] | transcript_product=putative mitochondria-associated granulocyte macrophage CSF signaling molecule | location=TGGT1_chrXII:4876403-4877496(-) | protein_length=136 | sequence_SO=chr…	0.02	1.969	4	1	2	1	136	14.6	10.18	1.8	1	1.154	0.21	0.00824807	170	147.3	6.39	5.99	168.3	157	176.2	156.7	171.7	185.9	172.9	156.4	145.5	139.4	161.1	140.7	161.4	141.8	149.2	154.7	1
TGGT1_260380	High	IsMasterProtein	TGGT1_260380-t26_1-p1	transcript=TGGT1_260380-t26_1 | gene=TGGT1_260380 | organism=Toxoplasma_gondii_GT1 | gene_product=hypothetical protein | transcript_product=hypothetical protein | location=TGGT1_chrVIIb:2298896-2302761(-) | protein_length=1108 | sequence_SO=chromosome | SO=protein_coding_gene | is_pseudo=false	0	15.68	6	5	6	5	1108	119.2	9.8	12.53	5	1.154	0.21	1.11125e-05	316.9	274.5	3.26	2.9	315.5	328.6	315.9	323.5	317.8	318.9	296.3	304.7	269	274.8	278.2	282.5	258.3	274.2	271.6	282.5	1
TGGT1_293870	High	IsMasterProtein	TGGT1_293870-t26_1-p1	transcript=TGGT1_293870-t26_1 | gene=TGGT1_293870 | organism=Toxoplasma_gondii_GT1 | gene_product=Thioredoxin [Source:UniProtKB/TrEMBL;Acc:A0A125YIY2] | transcript_product=putative thioredoxin | location=TGGT1_chrIa:604538-605891(+) | protein_length=106 | sequence_SO=chromosome | SO=protein_coding_gene | is_pseudo=false	0	59.63	55	8	54	8	106	12	5.11	162.08	8	1.154	0.21	5.76531e-06	5023.3	4351.4	3.15	2.33	5139.1	4968.8	5160.8	4863.7	5193.7	4762.8	5078.4	4900.5	4153.1	4348.2	4354.5	4436.3	4339.6	4472.2	4264.7	4408.8	1
TGGT1_224110	High	IsMasterProtein	TGGT1_224110-t26_1-p1	transcript=TGGT1_224110-t26_1 | gene=TGGT1_224110 | organism=Toxoplasma_gondii_GT1 | gene_product=RPN13_C domain-containing protein [Source:UniProtKB/TrEMBL;Acc:S7WBV2] | transcript_product=putative adhesion regulating molecule region protein | location=TGGT1_chrX:3221943-3228219(+) | protein_length=396 | sequence_SO=chromosome | SO=protein_coding_gene | is_pseudo=false	0	26.637	29	7	12	7	396	43.1	4.93	28.05	7	1.155	0.21	0.00162822	702.4	608.1	6.64	3.88	754.7	655.3	719.3	686	762.6	683.3	747	639.1	610.1	600.8	654.3	606.1	572.1	592.8	621.3	610.3	1
TGGT1_266120	High	IsMasterProtein	TGGT1_266120-t26_1-p1	transcript=TGGT1_266120-t26_1 | gene=TGGT1_266120 | organism=Toxoplasma_gondii_GT1 | gene_product=Glutathione peroxidase [Source:UniProtKB/TrEMBL;Acc:A0A125YUY1] | transcript_product=thioredoxin-dependent peroxidase TPX1/2 | location=TGGT1_chrIX:1111656-1115328(-) | protein_length=333 | sequence_SO=chromosome | SO=protein_coding_gene | is_pseudo=false	0	27.17	23	7	12	6	333	37.2	9.5	34.92	7	1.155	0.21	0.000336834	1490.8	1290.6	5.15	2.21	1391.9	1535.8	1402.7	1502.6	1479.1	1585.7	1473.7	1603.5	1236.1	1299	1288.7	1292.5	1326.9	1314.7	1264.8	1280.1	1
TGGT1_289730	High	IsMasterProtein	TGGT1_289730-t26_1-p1	transcript=TGGT1_289730-t26_1 | gene=TGGT1_289730 | organism=Toxoplasma_gondii_GT1 | gene_product=Pep3_Vps18 domain-containing protein [Source:UniProtKB/TrEMBL;Acc:S7UP33] | transcript_product=Pep3/Vps18/deep orange family protein | location=TGGT1_chrIX:3208543-3221175(-) | protein_length=1157 | sequence_SO=chromosome | SO=protein_coding_gene | is_pseudo=false	0	30.173	8	10	13	10	1157	128.2	5.96	26.37	10	1.155	0.21	0.000242043	539	466.8	5.04	4.21	536.5	509.2	550.4	510.6	555.6	504.7	582.5	541.5	481.9	462	471.6	481.3	432.5	436.4	473.8	451.3	1
TGGT1_295680	High	IsMasterProtein	TGGT1_295680-t26_1-p1	transcript=TGGT1_295680-t26_1 | gene=TGGT1_295680 | organism=Toxoplasma_gondii_GT1 | gene_product=Putative periodic tryptophan protein PWP2 [Source:UniProtKB/TrEMBL;Acc:A0A125YFJ1] | transcript_product=putative periodic tryptophan protein PWP2 | location=TGGT1_chrIa:1595494-1604605(-) | protein_length=1266 | sequence_SO=chromosome | SO=protein_coding_gene | is_pseudo=false	0	26.932	10	8	10	8	1266	136.7	8.57	25.75	8	1.155	0.21	0.000162149	467	404.2	4.23	4.17	482	468	492.3	466	448.8	474.2	429	460.2	437.7	379.2	405.6	402.9	393.8	396	406	411.3	1
TGGT1_316730	High	IsMasterProtein	TGGT1_316730-t26_1-p1	transcript=TGGT1_316730-t26_1 | gene=TGGT1_316730 | organism=Toxoplasma_gondii_GT1 | gene_product=C2 domain-containing protein [Source:UniProtKB/TrEMBL;Acc:S7UM90] | transcript_product=Sma protein | location=TGGT1_chrXI:5469116-5497370(+) | protein_length=2739 | sequence_SO=chromosome | SO=protein_coding_gene | is_pseudo=false	0	21.683	3	7	7	7	2739	306	5.76	20.86	7	1.155	0.21	0.00943638	560.3	485.2	7.7	6.87	541	603.8	558.7	562	490.3	590.9	487.5	564.8	455.1	483.6	447.9	512.2	424	486.8	519.9	490	1
TGGT1_206380	High	IsMasterProtein	TGGT1_206380-t26_1-p1	transcript=TGGT1_206380-t26_1 | gene=TGGT1_206380 | organism=Toxoplasma_gondii_GT1 | gene_product=hypothetical protein | transcript_product=hypothetical protein | location=TGGT1_chrVIIa:1008034-1018085(+) | protein_length=2455 | sequence_SO=chromosome | SO=protein_coding_gene | is_pseudo=false	0	8.369	2	4	4	4	2455	266.9	6.46	6.4	4	1.156	0.21	0.00646367	129.6	112.1	6.99	8.06	122.7	144	139.1	121.5	127.6	141.9	122.8	131.7	106.6	107.9	111.3	130.1	99.9	117.5	118.6	113	1
TGGT1_214780	High	IsMasterProtein	TGGT1_214780-t26_1-p1	transcript=TGGT1_214780-t26_1 | gene=TGGT1_214780 | organism=Toxoplasma_gondii_GT1 | gene_product=Nudix hydrolase domain-containing protein [Source:UniProtKB/TrEMBL;Acc:S7VZD7] | transcript_product=hydrolase, NUDIX family protein | location=TGGT1_chrX:6381449-6384378(-) | protein_length=220 | sequence_SO=chromosome | SO=protein_coding_gene | is_pseudo=false	0	16.898	25	6	9	6	220	25.2	6.54	26.08	6	1.156	0.21	0.0526992	1155.4	999.9	8.3	12	1145.2	1181.2	1055.3	1206.2	1074.9	944.4	1165.7	1220.9	814.9	1120.6	838.1	1071.3	942.3	1067.5	907	1060.9	1
TGGT1_204360	Medium	IsMasterProtein	TGGT1_204360-t26_1-p1	transcript=TGGT1_204360-t26_1 | gene=TGGT1_204360 | organism=Toxoplasma_gondii_GT1 | gene_product=Peptidase_S8 domain-containing protein [Source:UniProtKB/TrEMBL;Acc:S7UU74] | transcript_product=subtilisin SUB4 | location=TGGT1_chrVIIa:1751612-1758824(+) | protein_length=1242 | sequence_SO=chromosome | SO=protein_coding_gene | is_pseudo=false	0.047	1.444	1	1	1	1	1242	134.3	5.27	1.89	1	1.157	0.21	0.206337	46	39.8	15.47	19.02	50.7	46.7	53.2	45.4	38.6	39.3	50.9	33.7	49	35.3	39.9	44.8	27.1	30.3	42.5	39.7	1
TGGT1_240630	High	IsMasterProtein	TGGT1_240630-t26_1-p1	transcript=TGGT1_240630-t26_1 | gene=TGGT1_240630 | organism=Toxoplasma_gondii_GT1 | gene_product=Protein kinase domain-containing protein [Source:UniProtKB/TrEMBL;Acc:S7US21] | transcript_product=ULK kinase | location=TGGT1_chrVI:1314095-1317440(+) | protein_length=500 | sequence_SO=chromosome | SO=protein_coding_gene | is_pseudo=false	0.005	3.476	2	1	1	1	500	55.7	7.97	3.32	1	1.157	0.21	0.233838	76.5	66.1	8.53	12.86	75.9	67.2	83.5	73	79.5	76.3	89.2	76.7	79.5	65.6	77	64.3	64.7	66.7	89	65.4	1
TGGT1_257110	High	IsMasterProtein	TGGT1_257110-t26_1-p1	transcript=TGGT1_257110-t26_1 | gene=TGGT1_257110 | organism=Toxoplasma_gondii_GT1 | gene_product=hypothetical protein | transcript_product=hypothetical protein | location=TGGT1_chrVIIb:4149291-4151532(-) | protein_length=526 | sequence_SO=chromosome | SO=protein_coding_gene | is_pseudo=false	0.001	7.659	5	3	3	3	526	57.3	7.59	7.71	3	1.157	0.21	0.065869	122.5	105.8	9.68	10.28	125.4	133.6	130.4	110.1	119.6	134.5	101.1	118.6	111.7	97.2	100.9	113.1	95.1	104.8	129.7	106.9	1
TGGT1_257470	High	IsMasterProtein	TGGT1_257470-t26_1-p1	transcript=TGGT1_257470-t26_1 | gene=TGGT1_257470 | organism=Toxoplasma_gondii_GT1 | gene_product=Myosin motor domain-containing protein [Source:UniProtKB/TrEMBL;Acc:S7WF44] | transcript_product=myosin J | location=TGGT1_chrVIIb:3962778-3973847(+) | protein_length=2532 | sequence_SO=chromosome | SO=protein_coding_gene | is_pseudo=false	0	38.694	6	11	15	11	2532	273.5	8.65	42.5	11	1.157	0.21	3.31766e-06	999.4	864	2.45	2.89	955.7	994.9	1015.1	1004.1	954.8	973.7	1009.3	1003.8	852.9	865.8	862.2	896.5	811.5	845.8	874.3	871.7	1
TGGT1_261260B	High	IsMasterProtein	TGGT1_261260B-t26_1-p1	transcript=TGGT1_261260B-t26_1 | gene=TGGT1_261260B | organism=Toxoplasma_gondii_GT1 | gene_product=Histone lysine demethylase JMJD6a [Source:UniProtKB/TrEMBL;Acc:S7WE60] | transcript_product=histone lysine demethylase JMJD6a | location=TGGT1_chrVIIb:1768608-1769345(-) | protein_length=245 | sequence_SO=chromosome | SO=protein_coding_gene | is_pseudo=false	0	8.759	13	3	3	3	245	25.7	4.79	4.77	3	1.157	0.21	0.00130716	163	140.9	6.82	5.08	162.9	148.5	183.3	158.2	163.1	159.3	178	170.6	138.3	135.7	152.3	131.8	146.8	146.2	134.4	143.6	1
TGGT1_212850	High	IsMasterProtein	TGGT1_212850-t26_1-p1	transcript=TGGT1_212850-t26_1 | gene=TGGT1_212850 | organism=Toxoplasma_gondii_GT1 | gene_product=PI31_Prot_C domain-containing protein [Source:UniProtKB/TrEMBL;Acc:S7UPF2] | transcript_product=hypothetical protein | location=TGGT1_chrV:515723-519063(+) | protein_length=456 | sequence_SO=chromosome | SO=protein_coding_gene | is_pseudo=false	0.001	6.678	5	2	2	2	456	48.2	5.71	6.81	2	1.158	0.21	0.0885714	68.6	59.2	6.52	8.29	64.3	71.3	70.1	72.4	62.3	60.4	68.2	69	59.8	56	58.6	57.8	68	67.8	67.5	58.4	1
TGGT1_253060	Medium	IsMasterProtein	TGGT1_253060-t26_1-p1	transcript=TGGT1_253060-t26_1 | gene=TGGT1_253060 | organism=Toxoplasma_gondii_GT1 | gene_product=WD_REPEATS_REGION domain-containing protein [Source:UniProtKB/TrEMBL;Acc:S7W2B8] | transcript_product=WD domain, G-beta repeat-containing protein | location=TGGT1_chrIII:692424-694682(+) | protein_length=752 | sequence_SO=chromosome | SO=protein_coding_gene | is_pseudo=false	0.023	1.822	1	1	1	1	752	79.8	7.27	0	1	1.158	0.21	0.00601298	79.2	68.4	11.3	6.56	93.7	77.9	76.5	80.5	82.1	72.6	95.1	69.9	70.4	69.4	68.6	70.8	60.5	61.8	61.4	68.1	1
TGGT1_267510	High	IsMasterProtein	TGGT1_267510-t26_1-p1	transcript=TGGT1_267510-t26_1 | gene=TGGT1_267510 | organism=Toxoplasma_gondii_GT1 | gene_product=hypothetical protein | transcript_product=hypothetical protein | location=TGGT1_chrIX:439067-442936(-) | protein_length=346 | sequence_SO=chromosome | SO=protein_coding_gene | is_pseudo=false	0.003	4.075	6	1	1	1	346	38.1	9.17	4.15	1	1.158	0.21	0.161688	14.6	12.6	12.3	15.57	14.8	17.8	12.4	15.7	13.6	14.8	12.4	14.4	14.5	13	12.1	14.4	10.4	9.8	12.2	15.4	1
TGGT1_201230	High	IsMasterProtein	TGGT1_201230-t26_1-p1	transcript=TGGT1_201230-t26_1 | gene=TGGT1_201230 | organism=Toxoplasma_gondii_GT1 | gene_product=Kinesin motor domain-containing protein [Source:UniProtKB/TrEMBL;Acc:S7W467] | transcript_product=kinesin motor domain-containing protein | location=TGGT1_chrVIIa:3853006-3860259(+) | protein_length=1249 | sequence_SO=chromosome | SO=protein_coding_gene | is_pseudo=false	0.004	3.531	1	1	1	1	1249	135.8	8.02	2.95	1	1.159	0.21	0.537462	6.9	5.9	27.32	21.96	6.6	7.2	4.8	5.8	9.9	8.5	4.6	8.6	6.1	4.9	9.4	5.7	5.5	5.8	6.1	6.1	1
TGGT1_213420	High	IsMasterProtein	TGGT1_213420-t26_1-p1	transcript=TGGT1_213420-t26_1 | gene=TGGT1_213420 | organism=Toxoplasma_gondii_GT1 | gene_product=RAP domain-containing protein [Source:UniProtKB/TrEMBL;Acc:S7VX02] | transcript_product=RAP domain-containing protein | location=TGGT1_chrV:882634-892441(-) | protein_length=713 | sequence_SO=chromosome | SO=protein_coding_gene | is_pseudo=false	0.001	7.035	4	3	3	3	713	78.5	8.78	4.36	3	1.159	0.21	0.000207758	159.9	138	5.39	5.2	173	162.9	156.7	157.7	181.6	160.2	158.6	159.6	147.5	137.6	128.6	138.3	128.1	144.5	136.3	144.3	1
TGGT1_232390	Medium	IsMasterProtein	TGGT1_232390-t26_1-p1	transcript=TGGT1_232390-t26_1 | gene=TGGT1_232390 | organism=Toxoplasma_gondii_GT1 | gene_product=18S rRNA biogenesis protein RCL1 protein [Source:UniProtKB/TrEMBL;Acc:A0A125YMK4] | transcript_product=18S rRNA biogenesis protein RCL1 protein | location=TGGT1_chrVIII:2064885-2066632(+) | protein_length=442 | sequence_SO=chromosome | SO=protein_coding_gene | is_pseudo=false	0.015	2.316	3	1	1	1	442	47.7	8.73	0	1	1.159	0.21	0.0264109	69.3	59.8	9.43	8.19	68	67.2	71.9	56.7	73.1	80	70.1	68.5	61.6	52.4	70.2	58.1	59.9	61.5	59.7	59.1	1
TGGT1_239250	High	IsMasterProtein	TGGT1_239250-t26_1-p1	transcript=TGGT1_239250-t26_1 | gene=TGGT1_239250 | organism=Toxoplasma_gondii_GT1 | gene_product=Diacylglycerol kinase [Source:UniProtKB/TrEMBL;Acc:S7W6A2] | transcript_product=putative diacylglycerol kinase | location=TGGT1_chrVI:477947-486984(-) | protein_length=1841 | sequence_SO=chromosome | SO=protein_coding_gene | is_pseudo=false	0	13.558	3	5	6	5	1841	200.5	8.09	15.3	5	1.159	0.21	0.0083329	325.4	280.8	9.08	5.48	287.2	305.9	289.7	356.6	323.3	356.3	327.5	358.3	254.2	272.2	263.9	302.5	279.6	283.6	282	291.8	1
TGGT1_258625	High	IsMasterProtein	TGGT1_258625-t26_1-p1	transcript=TGGT1_258625-t26_1 | gene=TGGT1_258625 | organism=Toxoplasma_gondii_GT1 | gene_product=PPIase FKBP-type domain-containing protein [Source:UniProtKB/TrEMBL;Acc:S7W7K4] | transcript_product=peptidyl-prolyl cis-trans isomerase, FKBP-type domain-containing protein | location=TGGT1_chrVIIb:3263289-3267617(+) | protein_length=597 | sequence_SO=chromosome | SO=protein_coding_gene | is_pseudo=…	0.005	3.425	2	1	1	1	597	65.8	9.45	3.15	1	1.159	0.21	0.0426647	113.1	97.6	9.3	11.94	107.9	103	135.6	103.3	115.8	111.9	120.4	114.3	92.1	80.8	101.1	91.5	120.2	98.9	107.6	96.3	1
TGGT1_262540	High	IsMasterProtein	TGGT1_262540-t26_1-p1	transcript=TGGT1_262540-t26_1 | gene=TGGT1_262540 | organism=Toxoplasma_gondii_GT1 | gene_product=Protein kinase domain-containing protein [Source:UniProtKB/TrEMBL;Acc:S7UYC8] | transcript_product=putative protein kinase | location=TGGT1_chrVIIb:1149103-1153943(-) | protein_length=801 | sequence_SO=chromosome | SO=protein_coding_gene | is_pseudo=false	0	7.828	3	2	2	2	801	85.1	5.85	7.58	2	1.159	0.21	0.0313427	118.1	101.9	11.05	7.33	125.7	111.6	124.1	112.4	132.5	98.1	129.1	101.3	98.8	89.2	105	109.7	106	93.7	107	95.5	1
TGGT1_266366	High	IsMasterProtein	TGGT1_266366-t26_1-p1	transcript=TGGT1_266366-t26_1 | gene=TGGT1_266366 | organism=Toxoplasma_gondii_GT1 | gene_product=BT1 family protein [Source:UniProtKB/TrEMBL;Acc:S7VUS8] | transcript_product=BT1 family protein | location=TGGT1_chrIX:1028717-1031701(+) | protein_length=994 | sequence_SO=chromosome | SO=protein_coding_gene | is_pseudo=false	0.005	3.253	1	1	1	1	994	106.6	6.13	2.45	1	1.159	0.21	0.397316	10.6	9.2	26.16	28.7	13.4	15.6	13.3	11	6.7	9.1	10.3	9	10.7	6.3	7.4	9.6	6.7	8.8	14	12	1
TGGT1_282090	High	IsMasterProtein	TGGT1_282090-t26_1-p1	transcript=TGGT1_282090-t26_1 | gene=TGGT1_282090 | organism=Toxoplasma_gondii_GT1 | gene_product=hypothetical protein | transcript_product=hypothetical protein | location=TGGT1_chrVIIa:4278110-4286066(-) | protein_length=543 | sequence_SO=chromosome | SO=protein_coding_gene | is_pseudo=false	0	10.461	7	4	5	4	543	60.5	5.08	11.68	4	1.159	0.21	0.000709637	225	194.2	5.23	5.16	223.8	223.7	234.2	229.7	240	226.2	208.5	206	186.7	183.3	193.6	194.8	197.7	199.4	181.8	212.4	1
TGGT1_318560	High	IsMasterProtein	TGGT1_318560-t26_1-p1	transcript=TGGT1_318560-t26_1 | gene=TGGT1_318560 | organism=Toxoplasma_gondii_GT1 | gene_product=Protein-serine/threonine kinase [Source:UniProtKB/TrEMBL;Acc:S7UKA1] | transcript_product=ATPase/histidine kinase/DNA gyrase B/HSP90 domain-containing protein | location=TGGT1_chrIV:1166360-1172757(-) | protein_length=468 | sequence_SO=chromosome | SO=protein_coding_gene | is_pseudo=false	0	12.976	13	5	7	5	468	52.7	8.92	13.24	5	1.159	0.21	0.00948459	239.6	206.7	11.89	6.93	291.7	219.7	287.9	222.1	247.2	226.9	271.4	232.3	199	214.1	216.6	202.2	211.3	182.9	226.8	192.2	1
TGGT1_320610	High	IsMasterProtein	TGGT1_320610-t26_1-p1	transcript=TGGT1_320610-t26_1 | gene=TGGT1_320610 | organism=Toxoplasma_gondii_GT1 | gene_product=hypothetical protein | transcript_product=hypothetical protein | location=TGGT1_chrIV:148294-151097(-) | protein_length=771 | sequence_SO=chromosome | SO=protein_coding_gene | is_pseudo=false	0.001	7.558	5	3	3	3	771	83.8	8.7	6	3	1.159	0.21	0.0110658	71.5	61.7	6.45	6.48	75.4	78.1	66.1	71.8	66.4	75.8	67.4	71.2	68.1	61.2	60.4	60.4	59.2	62.2	69.3	67.8	1
TGGT1_226430	High	IsMasterProtein	TGGT1_226430-t26_1-p1	transcript=TGGT1_226430-t26_1 | gene=TGGT1_226430 | organism=Toxoplasma_gondii_GT1 | gene_product=Reticulon-like protein [Source:UniProtKB/TrEMBL;Acc:A0A125YHI4] | transcript_product=reticulon protein | location=TGGT1_chrX:1552488-1553078(-) | protein_length=196 | sequence_SO=chromosome | SO=protein_coding_gene | is_pseudo=false	0	17.23	32	7	17	7	196	21.6	7.69	40.63	7	1.16	0.21	0.0184576	2416.4	2084	10.76	6.04	2635.3	2233.4	2578.2	2150	2754.2	2264.8	2781.6	2201.7	2096	2072	2149.5	1967.6	2361.1	2004.7	2131.7	1985	1	Methylthio [C17]
TGGT1_248360	High	IsMasterProtein	TGGT1_248360-t26_1-p1	transcript=TGGT1_248360-t26_1 | gene=TGGT1_248360 | organism=Toxoplasma_gondii_GT1 | gene_product=hypothetical protein | transcript_product=hypothetical protein | location=TGGT1_chrXII:3757559-3758993(-) | protein_length=247 | sequence_SO=chromosome | SO=protein_coding_gene | is_pseudo=false	0.001	6.946	17	2	2	2	247	27.1	4.56	4.03	2	1.16	0.21	0.0321046	112.1	96.6	12.19	6.1	135.3	106.5	122.7	96.8	127.3	102.7	118	101.9	106.8	94.4	98.9	93.9	102.9	91.4	101.4	90.1	1
TGGT1_224950	High	IsMasterProtein	TGGT1_224950-t26_1-p1	transcript=TGGT1_224950-t26_1 | gene=TGGT1_224950 | organism=Toxoplasma_gondii_GT1 | gene_product=Calcium-dependent protein kinase CDPK5 [Source:UniProtKB/TrEMBL;Acc:S7UWW3] | transcript_product=calcium-dependent protein kinase CDPK5 | location=TGGT1_chrX:2551409-2556678(+) | protein_length=682 | sequence_SO=chromosome | SO=protein_coding_gene | is_pseudo=false	0.001	7.186	4	3	3	3	682	75.4	6.79	7.32	3	1.145	0.2	0.122995	52.1	45.5	15.44	7.58	48.3	53.9	64.6	41.2	53.3	50.9	63.6	46.1	43.9	43.6	53.2	45.2	41.7	46.6	47.6	45.8	1
TGGT1_227150	High	IsMasterProtein	TGGT1_227150-t26_1-p1	transcript=TGGT1_227150-t26_1 | gene=TGGT1_227150 | organism=Toxoplasma_gondii_GT1 | gene_product=Glutaredoxin domain-containing protein [Source:UniProtKB/TrEMBL;Acc:A0A125YTU0] | transcript_product=putative glutaredoxin | location=TGGT1_chrX:973361-975393(+) | protein_length=332 | sequence_SO=chromosome | SO=protein_coding_gene | is_pseudo=false	0.001	5.847	8	2	4	2	332	36.1	9.04	9.7	2	1.146	0.2	0.00286067	64.8	56.6	5.8	7.41	65.2	64.5	61	63.6	71.6	63.6	71.6	65.9	59.3	54.1	51.7	59.2	51.6	54	59.6	62.7	1
TGGT1_266080	High	IsMasterProtein	TGGT1_266080-t26_1-p1	transcript=TGGT1_266080-t26_1 | gene=TGGT1_266080 | organism=Toxoplasma_gondii_GT1 | gene_product=hypothetical protein | transcript_product=hypothetical protein | location=TGGT1_chrIX:1138397-1140583(+) | protein_length=728 | sequence_SO=chromosome | SO=protein_coding_gene | is_pseudo=false	0	48.321	18	13	25	13	728	81.2	8.69	59.69	13	1.146	0.2	0.000177667	2272.5	1982.2	4.31	3.82	2371.6	2146.8	2345.8	2143.7	2319.2	2246.6	2298.7	2137.3	2066.1	1889.2	1997	1991.1	1973.3	1882.4	2044.8	1872.6	1
TGGT1_309580	High	IsMasterProtein	TGGT1_309580-t26_1-p1	transcript=TGGT1_309580-t26_1 | gene=TGGT1_309580 | organism=Toxoplasma_gondii_GT1 | gene_product=Transporter, major facilitator family protein [Source:UniProtKB/TrEMBL;Acc:S7W138] | transcript_product=transporter, major facilitator family protein | location=TGGT1_chrXI:696715-705331(+) | protein_length=636 | sequence_SO=chromosome | SO=protein_coding_gene | is_pseudo=false	0	15.644	10	4	7	4	636	70.6	9.14	17.15	4	1.146	0.2	0.0565266	267	233.1	9.96	8.72	266.3	282.9	221	267.6	238.7	277.7	230.7	290.1	200.7	241.8	207.2	252.8	226.3	240	212.5	248.3	1
TGGT1_318525	High	IsMasterProtein	TGGT1_318525-t26_1-p1	transcript=TGGT1_318525-t26_1 | gene=TGGT1_318525 | organism=Toxoplasma_gondii_GT1 | gene_product=hypothetical protein | transcript_product=hypothetical protein | location=TGGT1_chrIV:1192489-1200329(-) | protein_length=1182 | sequence_SO=chromosome | SO=protein_coding_gene | is_pseudo=false	0	75.391	26	23	33	23	1182	127.8	8.22	82.44	23	1.146	0.2	0.00511437	2072	1807.5	6.92	3.43	1923.3	2197.2	1979.7	2211	1917.5	2168.5	1889.3	2178.5	1748	1861.6	1773.1	1914.8	1732.3	1847.5	1787.9	1827.2	1
TGGT1_210300	High	IsMasterProtein	TGGT1_210300-t26_1-p1	transcript=TGGT1_210300-t26_1 | gene=TGGT1_210300 | organism=Toxoplasma_gondii_GT1 | gene_product=hypothetical protein | transcript_product=hypothetical protein | location=TGGT1_chrIX:4679284-4689544(+) | protein_length=2469 | sequence_SO=chromosome | SO=protein_coding_gene | is_pseudo=false	0	20.557	4	6	7	6	2469	259.6	6.35	19.23	6	1.147	0.2	0.00197679	201.8	176	6.08	6.21	211.1	208.3	192.5	221.7	188.2	204.3	186	199.4	166.9	176.9	190.9	169.8	153.3	176.1	178.2	175.9	1
TGGT1_233720	High	IsMasterProtein	TGGT1_233720-t26_1-p1	transcript=TGGT1_233720-t26_1 | gene=TGGT1_233720 | organism=Toxoplasma_gondii_GT1 | gene_product=DNA-directed RNA polymerases I, II, and III subunit RPABC3 [Source:UniProtKB/TrEMBL;Acc:A0A125YZK8] | transcript_product=DNA-directed RNA polymerase II RPBABC8 | location=TGGT1_chrVIII:2745322-2747087(+) | protein_length=149 | sequence_SO=chromosome | SO=protein_coding_gene | is_pseudo=false	0	11.36	23	3	5	3	149	17	5.64	17.98	3	1.147	0.2	0.00330543	284	247.7	7.08	5.32	313.4	272.8	313.3	274.8	319.8	285.9	282.2	269.6	270.9	246.8	263.4	243.1	238.4	240.1	270.2	248.5	1
TGGT1_257480	High	IsMasterProtein	TGGT1_257480-t26_1-p1	transcript=TGGT1_257480-t26_1 | gene=TGGT1_257480 | organism=Toxoplasma_gondii_GT1 | gene_product=NADP-dependent succinate-semialdehyde dehydrogenase [Source:UniProtKB/TrEMBL;Acc:S7W7U1] | transcript_product=NADP-dependent succinate-semialdehyde dehydrogenase | location=TGGT1_chrVIIb:3956059-3958188(-) | protein_length=709 | sequence_SO=chromosome | SO=protein_coding_gene | is_pseudo=false	0	20.063	9	6	9	6	709	76	8.22	27.99	6	1.147	0.2	0.000976544	576.2	502.4	4.69	2.77	580.6	585.7	587.8	571.9	526.5	596.4	528.8	564.1	495.4	504.4	493.4	510.2	500.5	494.2	515.5	534.7	1
TGGT1_201810	Medium	IsMasterProtein	TGGT1_201810-t26_1-p1	transcript=TGGT1_201810-t26_1 | gene=TGGT1_201810 | organism=Toxoplasma_gondii_GT1 | gene_product=hypothetical protein | transcript_product=hypothetical protein | location=TGGT1_chrVIIa:3676601-3677629(-) | protein_length=342 | sequence_SO=chromosome | SO=protein_coding_gene | is_pseudo=false	0.016	2.262	4	1	1	1	342	37.1	4.77	1.61	1	1.148	0.2	0.693472	22.2	19.3	13.66	14.04	22.4	23.1	22	23.1	19.4	15.6	24.4	19.2	23	19.2	21.3	25.6	16.8	18.5	19.5	18.4	1
TGGT1_202250	High	IsMasterProtein	TGGT1_202250-t26_1-p1	transcript=TGGT1_202250-t26_1 | gene=TGGT1_202250 | organism=Toxoplasma_gondii_GT1 | gene_product=hypothetical protein | transcript_product=hypothetical protein | location=TGGT1_chrVIIa:3377943-3384690(+) | protein_length=1041 | sequence_SO=chromosome | SO=protein_coding_gene | is_pseudo=false	0.005	3.465	2	1	1	1	1041	110.3	6.3	2.37	1	1.148	0.2	0.499313	13.5	11.8	18.92	17.06	13.8	15.2	14	10.7	14.5	13.3	7.9	11.8	12.1	10.8	12.5	11.5	8.7	14.3	8.9	12.9	1
TGGT1_216250	High	IsMasterProtein	TGGT1_216250-t26_1-p1	transcript=TGGT1_216250-t26_1 | gene=TGGT1_216250 | organism=Toxoplasma_gondii_GT1 | gene_product=SMC_N domain-containing protein [Source:UniProtKB/TrEMBL;Acc:A0A125YPN3] | transcript_product=RecF/RecN/SMC N terminal domain-containing protein | location=TGGT1_chrXI:6201049-6213395(-) | protein_length=1418 | sequence_SO=chromosome | SO=protein_coding_gene | is_pseudo=false	0	19.03	5	6	7	6	1418	159	7.47	14.3	6	1.148	0.2	0.0143462	120.4	104.9	6.28	7.16	118.9	124.4	105.3	119.3	111.9	129.5	121.5	121.8	101.1	107.8	95.5	113	104.9	100	119.3	104.9	1
TGGT1_222300	High	IsMasterProtein	TGGT1_222300-t26_1-p1	transcript=TGGT1_222300-t26_1 | gene=TGGT1_222300 | organism=Toxoplasma_gondii_GT1 | gene_product=hypothetical protein | transcript_product=hypothetical protein | location=TGGT1_chrII:997106-1002828(-) | protein_length=1468 | sequence_SO=chromosome | SO=protein_coding_gene | is_pseudo=false	0	102.68	24	31	44	31	1468	159	5.64	106.99	31	1.148	0.2	4.06046e-07	3122.1	2718.9	1.5	2.3	3093.3	3184.3	3117.9	3209.4	3102.8	3192.2	3097.1	3126.4	2679.2	2727.1	2710.6	2744.3	2620.6	2804.7	2710.7	2811.4	1
TGGT1_222400	High	IsMasterProtein	TGGT1_222400-t26_1-p1	transcript=TGGT1_222400-t26_1 | gene=TGGT1_222400 | organism=Toxoplasma_gondii_GT1 | gene_product=hypothetical protein | transcript_product=hypothetical protein | location=TGGT1_chrII:1096079-1099979(+) | protein_length=628 | sequence_SO=chromosome | SO=protein_coding_gene | is_pseudo=false	0	37.157	20	12	20	12	628	67.9	4.87	53.67	12	1.148	0.2	4.91232e-06	1651.9	1439	2.95	1.86	1679.8	1602.1	1680.2	1578.4	1659.3	1644.4	1728.3	1617.4	1385.4	1463.8	1422.7	1434.1	1473	1443	1444.3	1435	1
TGGT1_246690	High	IsMasterProtein	TGGT1_246690-t26_1-p1	transcript=TGGT1_246690-t26_1 | gene=TGGT1_246690 | organism=Toxoplasma_gondii_GT1 | gene_product=Aamy domain-containing protein [Source:UniProtKB/TrEMBL;Acc:S7V0V2] | transcript_product=alpha amylase, catalytic domain-containing protein | location=TGGT1_chrXII:2857891-2868760(+) | protein_length=901 | sequence_SO=chromosome | SO=protein_coding_gene | is_pseudo=false	0	8.435	4	3	3	3	901	99.9	5.8	5.78	3	1.148	0.2	0.102831	159.8	139.2	5.21	10.39	147	170.1	162.4	155.1	166	170.1	153.5	157.3	141.2	137.3	135	169.3	132.2	133.3	161.5	162.3	1
TGGT1_264600	High	IsMasterProtein	TGGT1_264600-t26_1-p1	transcript=TGGT1_264600-t26_1 | gene=TGGT1_264600 | organism=Toxoplasma_gondii_GT1 | gene_product=hypothetical protein | transcript_product=hypothetical protein | location=TGGT1_chrIX:2002733-2003872(+) | protein_length=217 | sequence_SO=chromosome | SO=protein_coding_gene | is_pseudo=false	0	8.233	12	3	5	3	217	23.9	7.65	9.98	3	1.148	0.2	0.00553805	365.9	318.6	4.94	6.78	367.1	338.3	360.2	328.3	377.4	366.1	365.6	377.8	324.8	306.9	335.4	313	324.4	292.7	355.1	291.7	1
TGGT1_315130	High	IsMasterProtein	TGGT1_315130-t26_1-p1	transcript=TGGT1_315130-t26_1 | gene=TGGT1_315130 | organism=Toxoplasma_gondii_GT1 | gene_product=L-isoaspartyl protein carboxyl methyltransferase family protein [Source:UniProtKB/TrEMBL;Acc:S7VV27] | transcript_product=L-isoaspartyl protein carboxyl methyltransferase family protein | location=TGGT1_chrXI:4454253-4457653(-) | protein_length=539 | sequence_SO=chromosome | SO=protein_coding_gene | …	0	10.258	6	4	5	4	539	58.5	8.92	11.62	4	1.148	0.2	0.000149757	611.1	532.3	4.21	4.72	574.3	652.3	612.2	641.9	608	610.1	589.2	627.9	509.7	541.6	528.6	538.3	485.6	536	513.5	568.6	1
TGGT1_239087	High	IsMasterProtein	TGGT1_239087-t26_1-p1	transcript=TGGT1_239087-t26_1 | gene=TGGT1_239087 | organism=Toxoplasma_gondii_GT1 | gene_product=hypothetical protein | transcript_product=hypothetical protein | location=TGGT1_chrVI:449727-450523(+) | protein_length=150 | sequence_SO=chromosome | SO=protein_coding_gene | is_pseudo=false	0.003	4.002	15	1	1	1	150	17.3	10.39	4.99	1	1.149	0.2	0.239383	8.5	7.4	19.8	20.09	7.9	9.7	6.9	10.1	9.1	11.2	7.7	6.2	NA	9	5.9	7.4	9.1	7.7	5.4	6.4	1
TGGT1_247510	High	IsMasterProtein	TGGT1_247510-t26_1-p1	transcript=TGGT1_247510-t26_1 | gene=TGGT1_247510 | organism=Toxoplasma_gondii_GT1 | gene_product=FBPase domain-containing protein [Source:UniProtKB/TrEMBL;Acc:A0A125YGG2] | transcript_product=fructose-bisphospatase II | location=TGGT1_chrXII:3317257-3321142(+) | protein_length=381 | sequence_SO=chromosome | SO=protein_coding_gene | is_pseudo=false	0	77.387	39	15	52	15	381	42.4	6.61	153.32	15	1.149	0.2	0.000194843	5358.6	4665.2	4.18	4.45	5632.7	5105.7	5436.2	5170.5	5558.2	5142.8	5645.2	5282.1	4774.1	4495.1	4786.2	4367.7	4994.5	4802.2	4558.7	4528.6	1	Methylthio [C262; C368; C374]
TGGT1_257750	High	IsMasterProtein	TGGT1_257750-t26_1-p1	transcript=TGGT1_257750-t26_1 | gene=TGGT1_257750 | organism=Toxoplasma_gondii_GT1 | gene_product=Hcy-binding domain-containing protein [Source:UniProtKB/TrEMBL;Acc:S7UZC0] | transcript_product=homocysteine s-methyltransferase domain-containing protein | location=TGGT1_chrVIIb:3785581-3789978(+) | protein_length=434 | sequence_SO=chromosome | SO=protein_coding_gene | is_pseudo=false	0	40.056	24	11	21	11	434	46.5	5.91	57.88	11	1.149	0.2	9.6047e-06	3241	2819.8	2.87	1.22	3183.5	3396.9	3149.4	3339.1	3148.2	3284.7	3197.9	3299.2	2766.2	2821.3	2818.4	2873.4	2815.5	2847.9	2816.8	2867.9	1
TGGT1_263630	High	IsMasterProtein	TGGT1_263630-t26_1-p1	transcript=TGGT1_263630-t26_1 | gene=TGGT1_263630 | organism=Toxoplasma_gondii_GT1 | gene_product=hypothetical protein | transcript_product=hypothetical protein | location=TGGT1_chrVIIb:401360-404075(-) | protein_length=136 | sequence_SO=chromosome | SO=protein_coding_gene | is_pseudo=false	0	9.902	29	4	8	4	136	15.5	10.21	15.42	4	1.149	0.2	0.00437167	412.8	359.4	5.76	3.38	426.5	415.4	372.5	415.6	410.7	366.7	415	381.6	356	356.7	362.1	340.3	375.6	343.5	367.3	367.6	1
TGGT1_269330	High	IsMasterProtein	TGGT1_269330-t26_1-p1	transcript=TGGT1_269330-t26_1 | gene=TGGT1_269330 | organism=Toxoplasma_gondii_GT1 | gene_product=hypothetical protein | transcript_product=hypothetical protein | location=TGGT1_chrVIII:5887253-5890155(+) | protein_length=254 | sequence_SO=chromosome | SO=protein_coding_gene | is_pseudo=false	0.001	6.686	9	2	3	2	254	28.4	5.33	6.08	2	1.149	0.2	0.00484971	72.5	63.1	7.34	5.93	72.4	66.9	70.4	69.6	84.4	72.6	77.2	73.9	59.9	62.5	65	62.4	63.7	67.2	70.7	59.3	1
TGGT1_275750	High	IsMasterProtein	TGGT1_275750-t26_1-p1	transcript=TGGT1_275750-t26_1 | gene=TGGT1_275750 | organism=Toxoplasma_gondii_GT1 | gene_product=Small nuclear ribonucleoprotein E [Source:UniProtKB/TrEMBL;Acc:A0A125YK47] | transcript_product=putative small nuclear ribonucleoprotein E | location=TGGT1_chrIII:236922-238994(-) | protein_length=91 | sequence_SO=chromosome | SO=protein_coding_gene | is_pseudo=false	0	12.129	48	3	5	3	91	10.8	9.7	12.48	3	1.149	0.2	0.0658222	196.3	170.9	10.75	9.87	241.9	200.1	217	174	189.5	192.6	205.3	181.7	203.1	157	171.1	184.4	159.2	170.7	199.2	166.6	1
TGGT1_278740	High	IsMasterProtein	TGGT1_278740-t26_1-p1	transcript=TGGT1_278740-t26_1 | gene=TGGT1_278740 | organism=Toxoplasma_gondii_GT1 | gene_product=Diaminopimelate decarboxylase [Source:UniProtKB/TrEMBL;Acc:S7W8B6] | transcript_product=diaminopimelate decarboxylase | location=TGGT1_chrXII:5822054-5825645(-) | protein_length=686 | sequence_SO=chromosome | SO=protein_coding_gene | is_pseudo=false	0.003	4.049	3	2	2	2	686	75.7	6.93	4.22	2	1.149	0.2	0.00548296	214.8	186.9	5.35	7.96	227.7	201.7	234	214.8	208.7	216.9	214.7	201.3	189.8	176.3	191	184	192.2	183.4	211	159	1
TGGT1_286630	High	IsMasterProtein	TGGT1_286630-t26_1-p1	transcript=TGGT1_286630-t26_1 | gene=TGGT1_286630 | organism=Toxoplasma_gondii_GT1 | gene_product=Peroxiredoxin [Source:UniProtKB/TrEMBL;Acc:S7VWS3] | transcript_product=redoxin domain-containing protein | location=TGGT1_chrV:1606591-1607469(+) | protein_length=292 | sequence_SO=chromosome | SO=protein_coding_gene | is_pseudo=false	0	29.863	27	10	20	10	292	31.1	8.79	52.03	10	1.149	0.2	1.55535e-07	2722.3	2368.3	0.7	1.62	2723.6	2685	2720.9	2708.4	2736	2697.6	2724.7	2741.7	2309.9	2416.4	2383.7	2376.2	2360.4	2399.6	2326.8	2325.8	1
TGGT1_305180	High	IsMasterProtein	TGGT1_305180-t26_1-p1	transcript=TGGT1_305180-t26_1 | gene=TGGT1_305180 | organism=Toxoplasma_gondii_GT1 | gene_product=Na_H_Exchanger domain-containing protein [Source:UniProtKB/TrEMBL;Acc:S7UI51] | transcript_product=Na+/H+ exchanger NHE3 | location=TGGT1_chrIX:5043402-5051565(-) | protein_length=1565 | sequence_SO=chromosome | SO=protein_coding_gene | is_pseudo=false	0	32.823	9	10	13	10	1565	167.1	7.78	31.36	10	1.149	0.2	0.0017504	302.8	263.6	5.68	6.51	331.3	310.6	320.2	304.6	276.9	289.6	301	294.7	257.9	263.3	264.8	265.4	228.8	263.9	252.3	290.1	1
TGGT1_313340	High	IsMasterProtein	TGGT1_313340-t26_1-p1	transcript=TGGT1_313340-t26_1 | gene=TGGT1_313340 | organism=Toxoplasma_gondii_GT1 | gene_product=hypothetical protein | transcript_product=hypothetical protein | location=TGGT1_chrXI:3246107-3255996(-) | protein_length=1444 | sequence_SO=chromosome | SO=protein_coding_gene | is_pseudo=false	0	23.948	6	9	10	9	1444	161	6.54	25.59	9	1.149	0.2	0.0153047	648.4	564.3	7.44	4.13	578.7	661	636.1	680.4	594	673.7	565.7	675.7	580.9	558.8	550	597.2	522.1	564.5	564	585.4	1
TGGT1_213950	High	IsMasterProtein	TGGT1_213950-t26_1-p1	transcript=TGGT1_213950-t26_1 | gene=TGGT1_213950 | organism=Toxoplasma_gondii_GT1 | gene_product=hypothetical protein | transcript_product=hypothetical protein | location=TGGT1_chrV:1327225-1329387(-) | protein_length=720 | sequence_SO=chromosome | SO=protein_coding_gene | is_pseudo=false	0.003	4.461	3	2	2	2	720	77.5	5.47	2.35	2	1.15	0.2	0.000895736	141.8	123.2	6.51	3.14	154.8	143.5	143.4	140.2	136.6	163.9	138.8	139	120.3	119.3	128.8	123.8	122.7	123.2	130.7	123.3	1
TGGT1_230440	High	IsMasterProtein	TGGT1_230440-t26_1-p1	transcript=TGGT1_230440-t26_1 | gene=TGGT1_230440 | organism=Toxoplasma_gondii_GT1 | gene_product=CHY zinc finger domain-containing protein [Source:UniProtKB/TrEMBL;Acc:S7WB93] | transcript_product=CHY zinc finger domain-containing protein | location=TGGT1_chrVIII:783011-791001(-) | protein_length=452 | sequence_SO=chromosome | SO=protein_coding_gene | is_pseudo=false	0	14.126	12	5	5	5	452	51.2	5.22	14.53	5	1.15	0.2	0.000329901	268.7	233.5	5.34	3.24	293.7	262.7	286	247.2	262.6	267.3	270.1	273	235.2	229.5	245.4	219.4	228.9	232.4	237.6	234.6	1
TGGT1_253070	High	IsMasterProtein	TGGT1_253070-t26_1-p1	transcript=TGGT1_253070-t26_1 | gene=TGGT1_253070 | organism=Toxoplasma_gondii_GT1 | gene_product=Hydrolase, TatD family protein [Source:UniProtKB/TrEMBL;Acc:S7VVW3] | transcript_product=hydrolase, TatD family protein | location=TGGT1_chrIII:697423-702989(+) | protein_length=708 | sequence_SO=chromosome | SO=protein_coding_gene | is_pseudo=false	0	13.122	7	5	6	5	708	78.3	9.69	12.68	5	1.15	0.2	0.00654129	313.7	272.8	7.96	6.35	285.8	288.7	313.5	351.8	313.9	347.7	294.9	315.7	252.5	252.7	277.9	286.3	256.4	272.6	301.1	273.1	1
TGGT1_263760	High	IsMasterProtein	TGGT1_263760-t26_1-p1	transcript=TGGT1_263760-t26_1 | gene=TGGT1_263760 | organism=Toxoplasma_gondii_GT1 | gene_product=hypothetical protein | transcript_product=hypothetical protein | location=TGGT1_chrVIIb:304232-310338(+) | protein_length=1727 | sequence_SO=chromosome | SO=protein_coding_gene | is_pseudo=false	0	10.31	2	3	3	3	1727	184.7	6.87	6.16	3	1.15	0.2	0.0151605	127.5	110.9	9.42	4.4	138.4	124.5	107.6	115.7	144.2	135.3	129.6	125.6	118.3	110.6	108.1	115.4	111.2	104.5	111.4	104.3	1
TGGT1_288670	High	IsMasterProtein	TGGT1_288670-t26_1-p1	transcript=TGGT1_288670-t26_1 | gene=TGGT1_288670 | organism=Toxoplasma_gondii_GT1 | gene_product=hypothetical protein | transcript_product=hypothetical protein | location=TGGT1_chrIX:2471728-2476060(-) | protein_length=1274 | sequence_SO=chromosome | SO=protein_coding_gene | is_pseudo=false	0.006	3.146	1	1	1	1	1274	135.4	8.27	2.52	1	1.15	0.2	0.148563	45.6	39.6	10.25	8.28	47.8	45.6	45.5	42.6	49.2	34.7	47.5	43.3	42.4	46	37.4	37.3	41	43.5	38.3	37.2	1
TGGT1_318210	High	IsMasterProtein	TGGT1_318210-t26_1-p1	transcript=TGGT1_318210-t26_1 | gene=TGGT1_318210 | organism=Toxoplasma_gondii_GT1 | gene_product=hypothetical protein | transcript_product=hypothetical protein | location=TGGT1_chrIV:1423684-1427283(-) | protein_length=1199 | sequence_SO=chromosome | SO=protein_coding_gene | is_pseudo=false	0	21.987	10	6	7	6	1199	126.5	5.2	17.1	6	1.15	0.2	0.00107705	166.1	144.4	4.95	5.46	173.2	165.5	173	165.5	159.5	166.7	171	148.6	151	134.9	149.7	152.4	139.3	136.3	136	151.2	1
TGGT1_236070	High	IsMasterProtein	TGGT1_236070-t26_1-p1	transcript=TGGT1_236070-t26_1 | gene=TGGT1_236070 | organism=Toxoplasma_gondii_GT1 | gene_product=Pyrroline-5-carboxylate reductase [Source:UniProtKB/TrEMBL;Acc:S7W608] | transcript_product=pyrroline-5-carboxylate reductase | location=TGGT1_chrX:5149282-5154572(-) | protein_length=337 | sequence_SO=chromosome | SO=protein_coding_gene | is_pseudo=false	0	22.155	14	5	15	5	337	36.2	8.31	30.03	5	1.151	0.2	5.71243e-06	1266.5	1099.9	2.83	2.76	1255	1278.1	1231.5	1302.2	1225.8	1290.8	1229.2	1317.3	1068	1095.4	1104.4	1149.8	1143.8	1092.9	1130.4	1076.4	1
TGGT1_257370	Medium	IsMasterProtein	TGGT1_257370-t26_1-p1	transcript=TGGT1_257370-t26_1 | gene=TGGT1_257370 | organism=Toxoplasma_gondii_GT1 | gene_product=hypothetical protein | transcript_product=hypothetical protein | location=TGGT1_chrVIIb:4019662-4025753(+) | protein_length=1116 | sequence_SO=chromosome | SO=protein_coding_gene | is_pseudo=false	0.011	2.623	1	1	2	1	1116	121.6	9.38	2.57	1	1.151	0.2	0.0195628	42.8	37.2	8.04	10.54	47.6	42.4	37.2	42.4	47	43.4	43.1	39.6	42.5	33.7	39.3	37.1	39	30.3	33.8	37.2	1
TGGT1_262010	High	IsMasterProtein	TGGT1_262010-t26_1-p1	transcript=TGGT1_262010-t26_1 | gene=TGGT1_262010 | organism=Toxoplasma_gondii_GT1 | gene_product=Calmodulin CAM2 [Source:UniProtKB/TrEMBL;Acc:A0A125YUD0] | transcript_product=calmodulin CAM2 | location=TGGT1_chrVIIb:1401611-1403836(+) | protein_length=142 | sequence_SO=chromosome | SO=protein_coding_gene | is_pseudo=false	0.001	7.252	23	3	3	3	142	15.4	4.74	4.5	3	1.151	0.2	0.223299	112.4	97.6	7.62	13.61	113.7	115.6	112.6	110.9	100.2	92.6	112.3	115.8	84.7	105.6	89.2	111.2	89.9	102.5	93	125.2	1
TGGT1_315160	High	IsMasterProtein	TGGT1_315160-t26_1-p1	transcript=TGGT1_315160-t26_1 | gene=TGGT1_315160 | organism=Toxoplasma_gondii_GT1 | gene_product=hypothetical protein | transcript_product=hypothetical protein | location=TGGT1_chrXI:4475625-4484056(-) | protein_length=437 | sequence_SO=chromosome | SO=protein_coding_gene | is_pseudo=false	0.003	4.695	6	2	2	2	437	49.7	9.19	3.09	2	1.151	0.2	0.00133745	147.8	128.4	6.73	6.32	163.7	133.4	149.5	146.1	145	155.4	140.2	159	132.6	118.2	131.1	135.6	126.2	119.4	130.5	113.5	1
TGGT1_201770	High	IsMasterProtein	TGGT1_201770-t26_1-p1	transcript=TGGT1_201770-t26_1 | gene=TGGT1_201770 | organism=Toxoplasma_gondii_GT1 | gene_product=CULLIN_2 domain-containing protein [Source:UniProtKB/TrEMBL;Acc:S7UVZ3] | transcript_product=putative cullin 3 | location=TGGT1_chrVIIa:3702948-3713888(+) | protein_length=930 | sequence_SO=chromosome | SO=protein_coding_gene | is_pseudo=false	0	12.538	5	4	4	4	930	103.8	8.19	12.27	4	1.152	0.2	0.000682062	374.8	325.3	5.28	3.96	400.3	372.2	401.7	345.7	385.8	377.3	370.7	354.7	346.2	330.9	327	323.5	348.6	314.2	318.6	317	1
TGGT1_215910	High	IsMasterProtein	TGGT1_215910-t26_1-p1	transcript=TGGT1_215910-t26_1 | gene=TGGT1_215910 | organism=Toxoplasma_gondii_GT1 | gene_product=bMG10 domain-containing protein [Source:UniProtKB/TrEMBL;Acc:S7ULS1] | transcript_product=hypothetical protein | location=TGGT1_chrXI:6452010-6464550(+) | protein_length=3029 | sequence_SO=chromosome | SO=protein_coding_gene | is_pseudo=false	0	73.569	8	25	32	25	3029	327.8	6.81	81.95	25	1.152	0.2	0.00216451	2487	2159.1	6.41	2.22	2377.7	2601.3	2319	2612.9	2376.6	2654.5	2275.7	2640.1	2157.4	2200.1	2139.3	2210.3	2070.2	2160.9	2112.5	2196.5	1
TGGT1_223780	Low	IsMasterProtein	TGGT1_223780-t26_1-p1	transcript=TGGT1_223780-t26_1 | gene=TGGT1_223780 | organism=Toxoplasma_gondii_GT1 | gene_product=hypothetical protein | transcript_product=hypothetical protein | location=TGGT1_chrX:3487462-3501445(-) | protein_length=1881 | sequence_SO=chromosome | SO=protein_coding_gene | is_pseudo=false	0.062	1.304	1	1	1	1	1881	207.6	8.32	0	1	1.152	0.2	0.0674933	48.7	42.3	9.27	6.65	42.4	40.1	53.2	49.3	48.1	48.7	51.8	48.7	47.4	39.1	44.9	42.8	41.8	40.4	45.9	41.5	1
TGGT1_272270	High	IsMasterProtein	TGGT1_272270-t26_1-p1	transcript=TGGT1_272270-t26_1 | gene=TGGT1_272270 | organism=Toxoplasma_gondii_GT1 | gene_product=Radical SAM domain-containing protein [Source:UniProtKB/TrEMBL;Acc:S7V3V9] | transcript_product=radical SAM domain-containing protein | location=TGGT1_chrVIII:4103280-4110852(-) | protein_length=1166 | sequence_SO=chromosome | SO=protein_coding_gene | is_pseudo=false	0	10.039	5	4	4	4	1166	125.7	7.08	6.3	4	1.152	0.2	0.00898912	238.5	207.1	7.75	5.91	249.4	217.7	252.3	226.2	261	244.4	232.7	208.3	219.6	195.5	211.4	219.9	202.8	192.7	218.2	192.1	1
TGGT1_276120	High	IsMasterProtein	TGGT1_276120-t26_1-p1	transcript=TGGT1_276120-t26_1 | gene=TGGT1_276120 | organism=Toxoplasma_gondii_GT1 | gene_product=Putative histone lysine methyltransferase, SET [Source:UniProtKB/TrEMBL;Acc:S7W2P8] | transcript_product=putative histone lysine methyltransferase, SET | location=TGGT1_chrIII:124844-128595(-) | protein_length=965 | sequence_SO=chromosome | SO=protein_coding_gene | is_pseudo=false	0	21.517	11	8	9	8	965	105.1	7.36	10.65	8	1.152	0.2	0.0040709	381.2	331	6.13	2.16	379.9	404.4	353.7	385.6	382.6	400	351.7	343.1	325.6	341.2	345.2	331.4	327.2	325.9	330.6	333.8	1
TGGT1_306310	High	IsMasterProtein	TGGT1_306310-t26_1-p1	transcript=TGGT1_306310-t26_1 | gene=TGGT1_306310 | organism=Toxoplasma_gondii_GT1 | gene_product=RecF/RecN/SMC N terminal domain-containing protein [Source:UniProtKB/TrEMBL;Acc:S7VQR9] | transcript_product=RecF/RecN/SMC N terminal domain-containing protein | location=TGGT1_chrIX:5717474-5737469(-) | protein_length=1512 | sequence_SO=chromosome | SO=protein_coding_gene | is_pseudo=false	0	23.99	6	8	8	8	1512	168.8	6.07	16.4	8	1.137	0.19	0.00417681	246.4	216.7	6.64	3.6	245.6	235.1	274	247.2	255.1	242.2	252.2	217.2	206.5	212.5	216.2	221.1	217.2	207.2	224.2	228.5	1
TGGT1_236650	High	IsMasterProtein	TGGT1_236650-t26_1-p1	transcript=TGGT1_236650-t26_1 | gene=TGGT1_236650 | organism=Toxoplasma_gondii_GT1 | gene_product=DEAD (Asp-Glu-Ala-Asp) box polypeptide 17 [Source:UniProtKB/TrEMBL;Acc:A0A125YWJ5] | transcript_product=DEAD (Asp-Glu-Ala-Asp) box polypeptide 17 | location=TGGT1_chrX:5362273-5365892(-) | protein_length=550 | sequence_SO=chromosome | SO=protein_coding_gene | is_pseudo=false	0	113.404	42	21	80	21	550	59.9	8.94	240.77	21	1.138	0.19	0.00610391	7846	6893.6	6.83	2.91	8324.5	7305.3	8278	7224.7	8172.5	7532.5	8429.4	7242.2	7091.6	6778.7	7098.1	6714.8	7010.3	6681.5	7186.6	6762.7	1
TGGT1_244040	High	IsMasterProtein	TGGT1_244040-t26_1-p1	transcript=TGGT1_244040-t26_1 | gene=TGGT1_244040 | organism=Toxoplasma_gondii_GT1 | gene_product=HEAT repeat-containing protein [Source:UniProtKB/TrEMBL;Acc:S7UFP7] | transcript_product=HEAT repeat-containing protein | location=TGGT1_chrVI:2886249-2900429(-) | protein_length=1478 | sequence_SO=chromosome | SO=protein_coding_gene | is_pseudo=false	0	12.816	4	5	8	4	1478	164	6.02	17.56	5	1.138	0.19	0.00258482	259.6	228.1	4.87	7.21	259.2	270.3	280.3	244.8	250.1	260.1	277.4	255	235.3	221.1	207.7	240	214.1	237.9	204.5	247.7	1
TGGT1_272230	High	IsMasterProtein	TGGT1_272230-t26_1-p1	transcript=TGGT1_272230-t26_1 | gene=TGGT1_272230 | organism=Toxoplasma_gondii_GT1 | gene_product=Putative heat shock protein hslv [Source:UniProtKB/TrEMBL;Acc:S7WJH0] | transcript_product=putative heat shock protein hslv | location=TGGT1_chrVIII:4125920-4129252(-) | protein_length=338 | sequence_SO=chromosome | SO=protein_coding_gene | is_pseudo=false	0	10.469	11	2	5	2	338	36.1	8.68	18.28	2	1.138	0.19	0.000774051	415.8	365.3	3.64	4.18	439.8	403.5	419.1	414.9	426	404.7	416.6	390.5	400.8	378.9	365.5	365.2	355.8	360.2	387.5	362.8	1
TGGT1_312230	High	IsMasterProtein	TGGT1_312230-t26_1-p1	transcript=TGGT1_312230-t26_1 | gene=TGGT1_312230 | organism=Toxoplasma_gondii_GT1 | gene_product=DNA topoisomerase 2 [Source:UniProtKB/TrEMBL;Acc:S7W1T2] | transcript_product=putative DNA topoisomerase 2 | location=TGGT1_chrXI:2472947-2490813(-) | protein_length=1658 | sequence_SO=chromosome | SO=protein_coding_gene | is_pseudo=false	0	87.013	16	26	37	26	1658	185.8	7.44	89.32	26	1.138	0.19	2.61093e-05	2285.7	2008.1	2.86	0.86	2228.9	2371.7	2213.3	2373.4	2265	2360.4	2253.2	2306.6	2029.3	2005.2	1999.9	1986.2	2010.9	1987.9	2018.7	2032.2	1
TGGT1_314270	High	IsMasterProtein	TGGT1_314270-t26_1-p1	transcript=TGGT1_314270-t26_1 | gene=TGGT1_314270 | organism=Toxoplasma_gondii_GT1 | gene_product=RF_PROK_I domain-containing protein [Source:UniProtKB/TrEMBL;Acc:S7UTG8] | transcript_product=peptidyl-tRNA hydrolase domain-containing protein | location=TGGT1_chrXI:3941355-3946393(+) | protein_length=744 | sequence_SO=chromosome | SO=protein_coding_gene | is_pseudo=false	0.003	4.436	3	2	2	2	744	82.1	7.81	2.07	2	1.138	0.19	0.0188465	70.8	62.2	7.73	7.09	58.3	68.4	70.3	75.6	74.8	71.4	72	68	58.9	63.3	62	62.5	60.7	52.3	66.6	64.5	1
TGGT1_209200	High	IsMasterProtein	TGGT1_209200-t26_1-p1	transcript=TGGT1_209200-t26_1 | gene=TGGT1_209200 | organism=Toxoplasma_gondii_GT1 | gene_product=hypothetical protein | transcript_product=hypothetical protein | location=TGGT1_chrIb:1128185-1136295(+) | protein_length=753 | sequence_SO=chromosome | SO=protein_coding_gene | is_pseudo=false	0.001	7.142	5	3	3	3	753	82.1	7.05	5.04	3	1.139	0.19	0.00597914	215.9	189.6	5.19	5.9	220.9	217.8	233	218.6	214.1	205	209.4	196.1	187.9	209.3	178.6	193.4	191.3	206.8	181.2	184	1
TGGT1_215020	Medium	IsMasterProtein	TGGT1_215020-t26_1-p1	transcript=TGGT1_215020-t26_1 | gene=TGGT1_215020 | organism=Toxoplasma_gondii_GT1 | gene_product=hypothetical protein | transcript_product=hypothetical protein | location=TGGT1_chrX:6574013-6579944(-) | protein_length=531 | sequence_SO=chromosome | SO=protein_coding_gene | is_pseudo=false	0.015	2.366	2	1	1	1	531	59.5	10.24	2.06	1	1.139	0.19	0.106823	46.7	41	11.66	8.19	51.9	38.6	49.1	39	43.8	50.1	51.4	44.4	39.9	33.8	44.7	42	44.3	41.2	40.7	40.6	1
TGGT1_223150	High	IsMasterProtein	TGGT1_223150-t26_1-p1	transcript=TGGT1_223150-t26_1 | gene=TGGT1_223150 | organism=Toxoplasma_gondii_GT1 | gene_product=START domain-containing protein [Source:UniProtKB/TrEMBL;Acc:S7UL08] | transcript_product=START domain-containing protein | location=AAQM03000272:3482-7343(-) | protein_length=424 | sequence_SO=contig | SO=protein_coding_gene | is_pseudo=false	0.001	6.426	8	3	3	3	424	46.4	5.55	3.58	3	1.139	0.19	0.00258653	122.6	107.7	6.59	5.03	137	118.7	121.7	126.6	121.4	109.5	130.4	123.5	99	111.6	115.3	102.6	107.4	108	111.7	103.9	1
TGGT1_224650	High	IsMasterProtein	TGGT1_224650-t26_1-p1	transcript=TGGT1_224650-t26_1 | gene=TGGT1_224650 | organism=Toxoplasma_gondii_GT1 | gene_product=mRNA_triPase domain-containing protein [Source:UniProtKB/TrEMBL;Acc:S7UWK3] | transcript_product=mRNA capping enzyme, beta chain protein | location=TGGT1_chrX:2815581-2819580(-) | protein_length=920 | sequence_SO=chromosome | SO=protein_coding_gene | is_pseudo=false	0	11.284	7	4	7	4	920	95.9	5.63	6.75	4	1.139	0.19	0.0107541	190.9	167.5	4.49	6.09	175.9	201.4	192.6	189.2	198.4	195.5	182	186.8	158.6	167.6	166.6	186	167.5	180.7	164.6	186	1
TGGT1_290300	High	IsMasterProtein	TGGT1_290300-t26_1-p1	transcript=TGGT1_290300-t26_1 | gene=TGGT1_290300 | organism=Toxoplasma_gondii_GT1 | gene_product=hypothetical protein | transcript_product=hypothetical protein | location=TGGT1_chrIX:3500533-3501630(+) | protein_length=365 | sequence_SO=chromosome | SO=protein_coding_gene | is_pseudo=false	0	21.411	12	5	9	5	365	38.2	5.85	30.54	5	1.139	0.19	0.00134352	738.2	648.1	5.65	5.39	721.8	807.7	730.4	804	699.7	746	700.8	761.6	657.4	655.4	636.5	711.8	591.9	641	624.8	670.2	1
TGGT1_293790	Low	IsMasterProtein	TGGT1_293790-t26_1-p1	transcript=TGGT1_293790-t26_1 | gene=TGGT1_293790 | organism=Toxoplasma_gondii_GT1 | gene_product=hypothetical protein | transcript_product=hypothetical protein | location=TGGT1_chrIa:545859-546776(+) | protein_length=298 | sequence_SO=chromosome | SO=protein_coding_gene | is_pseudo=false	0.067	1.27	2	1	1	1	298	35.1	5.66	2.16	1	1.139	0.19	0.00670171	138	121.2	7.28	7.54	135.4	135.5	135.9	140.2	140	137.6	166.1	138.4	121.2	116.8	126.7	133.1	120.8	121.1	104.2	132	1
TGGT1_221630	High	IsMasterProtein	TGGT1_221630-t26_1-p1	transcript=TGGT1_221630-t26_1 | gene=TGGT1_221630 | organism=Toxoplasma_gondii_GT1 | gene_product=hypothetical protein | transcript_product=hypothetical protein | location=TGGT1_chrII:480275-488159(-) | protein_length=1940 | sequence_SO=chromosome | SO=protein_coding_gene | is_pseudo=false	0	26.348	6	10	10	9	1940	210.1	7.97	16.95	10	1.14	0.19	0.0220628	300.6	263.8	6.89	4.03	269.1	302.3	299.5	304.8	262	301.7	278.9	320.6	265.8	271.5	260	275.9	248	261.7	257.5	281.1	1
TGGT1_223970	High	IsMasterProtein	TGGT1_223970-t26_1-p1	transcript=TGGT1_223970-t26_1 | gene=TGGT1_223970 | organism=Toxoplasma_gondii_GT1 | gene_product=Elongation factor G, mitochondrial [Source:UniProtKB/TrEMBL;Acc:S7UWM4] | transcript_product=putative translation elongation and release factors (gtpases) | location=TGGT1_chrX:3323312-3326347(+) | protein_length=1011 | sequence_SO=chromosome | SO=protein_coding_gene | is_pseudo=false	0	11.33	5	3	3	3	1011	110.2	7.18	12.92	3	1.14	0.19	0.0310239	54.5	47.8	8.56	7.66	58.2	54.5	55.1	65	51.5	54.5	49.6	53.1	45.5	46.2	54.3	54.3	46.4	45.4	50.5	49.2	1
TGGT1_237570	High	IsMasterProtein	TGGT1_237570-t26_1-p1	transcript=TGGT1_237570-t26_1 | gene=TGGT1_237570 | organism=Toxoplasma_gondii_GT1 | gene_product=Leucine carboxyl methyltransferase [Source:UniProtKB/TrEMBL;Acc:S7W5H7] | transcript_product=leucine carboxyl methyltransferase | location=TGGT1_chrX:5881357-5887903(-) | protein_length=449 | sequence_SO=chromosome | SO=protein_coding_gene | is_pseudo=false	0	11.126	8	4	5	4	449	50.4	6.57	12.54	4	1.14	0.19	0.000472031	579.6	508.3	5	3.7	600.3	577	579	532.4	580.3	561.4	626.7	608.4	541.2	528.3	496.3	495.9	515.2	508.1	508.4	482.5	1
TGGT1_255250	High	IsMasterProtein	TGGT1_255250-t26_1-p1	transcript=TGGT1_255250-t26_1 | gene=TGGT1_255250 | organism=Toxoplasma_gondii_GT1 | gene_product=SAM_MT_RSMB_NOP domain-containing protein [Source:UniProtKB/TrEMBL;Acc:S7V2F4] | transcript_product=putative tRNA (cytosine(34)-C(5))-methyltransferase | location=TGGT1_chrVIIb:4863081-4872320(-) | protein_length=1066 | sequence_SO=chromosome | SO=protein_coding_gene | is_pseudo=false	0	21.972	10	9	12	9	1066	116.1	7.12	18.06	9	1.14	0.19	0.000933725	499.3	437.8	3.53	6.19	491.7	494.5	528.8	497.3	525.3	532.6	490.7	501.3	440.5	404.4	494.5	442.6	435.1	420.7	421.7	454.2	1
TGGT1_308093	High	IsMasterProtein	TGGT1_308093-t26_1-p1	transcript=TGGT1_308093-t26_1 | gene=TGGT1_308093 | organism=Toxoplasma_gondii_GT1 | gene_product=Protein kinase domain-containing protein [Source:UniProtKB/TrEMBL;Acc:S7UGC7] | transcript_product=rhoptry kinase family protein (incomplete catalytic triad) | location=AAQM03000505:476-1687(-) | protein_length=403 | sequence_SO=contig | SO=protein_coding_gene | is_pseudo=false	0.003	3.93	3	1	1	1	403	45.7	9.91	4.38	1	1.14	0.19	0.121854	32.9	28.8	14.96	19.93	44	42	32.5	34.4	29.5	31.1	33.1	32.6	27.1	21	28	37.5	22.7	29.6	35.9	32	1
TGGT1_205330	High	IsMasterProtein	TGGT1_205330-t26_1-p1	transcript=TGGT1_205330-t26_1 | gene=TGGT1_205330 | organism=Toxoplasma_gondii_GT1 | gene_product=hypothetical protein | transcript_product=hypothetical protein | location=TGGT1_chrVIIa:1382464-1383827(-) | protein_length=331 | sequence_SO=chromosome | SO=protein_coding_gene | is_pseudo=false	0.003	4.289	6	1	2	1	331	35.3	5.69	10.67	1	1.141	0.19	0.0692227	16.9	14.8	10.8	14.85	18.6	16.8	19.3	16	13.7	17.4	17	15.2	16.3	15.9	16	15.5	13	14.1	12.1	10.6	1
TGGT1_293190	High	IsMasterProtein	TGGT1_293190-t26_1-p1	transcript=TGGT1_293190-t26_1 | gene=TGGT1_293190 | organism=Toxoplasma_gondii_GT1 | gene_product=IPPc domain-containing protein [Source:UniProtKB/TrEMBL;Acc:A0A125YFF1] | transcript_product=endonuclease/exonuclease/phosphatase family protein | location=TGGT1_chrIa:133494-141236(+) | protein_length=682 | sequence_SO=chromosome | SO=protein_coding_gene | is_pseudo=false	0	34.539	19	11	16	11	682	76.2	5.47	36.73	11	1.141	0.19	0.000331627	1396.8	1224.8	5	3.14	1314	1485.1	1321.6	1433.1	1361.5	1461.7	1359.9	1475.3	1144.9	1265	1213.4	1242	1198.5	1236.2	1199.1	1250.4	1
TGGT1_208718	High	IsMasterProtein	TGGT1_208718-t26_1-p1	transcript=TGGT1_208718-t26_1 | gene=TGGT1_208718 | organism=Toxoplasma_gondii_GT1 | gene_product=TYR_PHOSPHATASE_2 domain-containing protein [Source:UniProtKB/TrEMBL;Acc:A0A125YJF9] | transcript_product=putative protein tyrosine phosphatase type IVA A | location=TGGT1_chrIb:840220-841949(-) | protein_length=404 | sequence_SO=chromosome | SO=protein_coding_gene | is_pseudo=false	0.001	7.103	7	2	3	2	404	44.1	9.07	6.4	2	1.142	0.19	0.134174	73.6	64.5	9.51	8.7	66.5	75.2	74.4	82.8	70.5	72.9	79.4	61	75	63.8	65.2	74.7	59.2	62	63.5	67.2	1
TGGT1_222010	High	IsMasterProtein	TGGT1_222010-t26_1-p1	transcript=TGGT1_222010-t26_1 | gene=TGGT1_222010 | organism=Toxoplasma_gondii_GT1 | gene_product=HAD hydrolase, family IIID protein [Source:UniProtKB/TrEMBL;Acc:S7UK67] | transcript_product=HAD hydrolase, family IIID protein | location=TGGT1_chrII:735040-740722(-) | protein_length=661 | sequence_SO=chromosome | SO=protein_coding_gene | is_pseudo=false	0.001	5.226	6	2	2	2	661	72.7	5.25	4.38	2	1.142	0.19	0.106223	41.9	36.7	16.06	11.31	51	38.8	54.9	41.7	38.1	34	45.5	42.1	35.3	32.5	38.6	45.6	37.4	32.5	38.2	35.9	1
TGGT1_224860	High	IsMasterProtein	TGGT1_224860-t26_1-p1	transcript=TGGT1_224860-t26_1 | gene=TGGT1_224860 | organism=Toxoplasma_gondii_GT1 | gene_product=S1 motif domain-containing protein [Source:UniProtKB/TrEMBL;Acc:S7W537] | transcript_product=putative exosome component 2 | location=TGGT1_chrX:2676348-2679517(-) | protein_length=353 | sequence_SO=chromosome | SO=protein_coding_gene | is_pseudo=false	0	9.74	9	3	3	3	353	38.7	8.69	12.63	3	1.142	0.19	0.000709637	339.6	297.4	5.51	3.75	324.9	351.3	322.6	332.9	380.1	330.9	346.5	350	297.9	291.7	302.7	322.7	285.9	296.9	301.1	290.9	1
TGGT1_267280	High	IsMasterProtein	TGGT1_267280-t26_1-p1	transcript=TGGT1_267280-t26_1 | gene=TGGT1_267280 | organism=Toxoplasma_gondii_GT1 | gene_product=hypothetical protein | transcript_product=hypothetical protein | location=TGGT1_chrIX:575774-580055(-) | protein_length=1020 | sequence_SO=chromosome | SO=protein_coding_gene | is_pseudo=false	0.003	4.179	2	2	2	2	1020	110.1	7.39	3.01	2	1.142	0.19	0.334697	19.1	16.7	20.91	22.08	18.8	19.1	20.8	15	24.2	19.2	11.9	22.7	18.1	16.7	17.4	16.2	10.4	12.6	16.8	22.4	1
TGGT1_285240	High	IsMasterProtein	TGGT1_285240-t26_1-p1	transcript=TGGT1_285240-t26_1 | gene=TGGT1_285240 | organism=Toxoplasma_gondii_GT1 | gene_product=S5A_REDUCTASE domain-containing protein [Source:UniProtKB/TrEMBL;Acc:A0A125YK59] | transcript_product=3-oxo-5-alpha-steroid 4-dehydrogenase | location=TGGT1_chrV:2347912-2353553(-) | protein_length=347 | sequence_SO=chromosome | SO=protein_coding_gene | is_pseudo=false	0.001	6.082	5	2	6	2	347	40.1	10.87	14.03	2	1.142	0.19	0.0308022	406.2	355.7	8.31	6.01	443.4	382.2	440.4	374.5	422.5	392.4	420.5	350.1	371.5	356.1	371.4	341.1	355.2	332	402	352	1
TGGT1_286620	High	IsMasterProtein	TGGT1_286620-t26_1-p1	transcript=TGGT1_286620-t26_1 | gene=TGGT1_286620 | organism=Toxoplasma_gondii_GT1 | gene_product=S1 RNA binding domain-containing protein [Source:UniProtKB/TrEMBL;Acc:S7UP02] | transcript_product=S1 RNA binding domain-containing protein | location=TGGT1_chrV:1609487-1616924(-) | protein_length=1523 | sequence_SO=chromosome | SO=protein_coding_gene | is_pseudo=false	0	17.095	6	7	8	7	1523	167.8	7.49	13.04	7	1.142	0.19	0.0875773	100.8	88.3	9.88	8.69	105.4	102.7	80.7	89.7	98.6	107.4	110.2	99	99	87.6	88.9	81.8	78.4	95.2	81.7	96.7	1
TGGT1_287260	Medium	IsMasterProtein	TGGT1_287260-t26_1-p1	transcript=TGGT1_287260-t26_1 | gene=TGGT1_287260 | organism=Toxoplasma_gondii_GT1 | gene_product=hypothetical protein | transcript_product=hypothetical protein | location=TGGT1_chrV:1346495-1351213(-) | protein_length=1572 | sequence_SO=chromosome | SO=protein_coding_gene | is_pseudo=false	0.014	2.396	1	1	1	1	1572	168.6	5.66	2.07	1	1.142	0.19	0.425969	25.9	22.7	13.74	6.12	23.4	25.5	26.5	26.2	26.4	27.1	22.4	17.1	24.6	23	20.4	21.4	21.9	24	23.2	22.3	1
TGGT1_288460	High	IsMasterProtein	TGGT1_288460-t26_1-p1	transcript=TGGT1_288460-t26_1 | gene=TGGT1_288460 | organism=Toxoplasma_gondii_GT1 | gene_product=hypothetical protein | transcript_product=hypothetical protein | location=TGGT1_chrIX:2367582-2381598(+) | protein_length=1816 | sequence_SO=chromosome | SO=protein_coding_gene | is_pseudo=false	0	40.627	9	13	18	13	1816	198.2	6.47	41.67	13	1.142	0.19	2.31601e-05	994	870.6	2.98	3.37	1021.4	949.3	1006.4	957.7	1025.3	981.9	1014.6	974.6	902.4	876.6	888.7	864.7	848.6	826.7	900.6	834.1	1
TGGT1_297510	Low	IsMasterProtein	TGGT1_297510-t26_1-p1	transcript=TGGT1_297510-t26_1 | gene=TGGT1_297510 | organism=Toxoplasma_gondii_GT1 | gene_product=hypothetical protein | transcript_product=hypothetical protein | location=TGGT1_chrII:1818640-1821877(+) | protein_length=433 | sequence_SO=chromosome | SO=protein_coding_gene | is_pseudo=false	0.051	1.396	2	1	1	1	433	48.7	6.07	1.78	1	1.142	0.19	0.040766	97.2	85.1	7.27	10.47	91.7	88.4	107.5	99.1	103.1	96.3	98	87.5	91.8	76.9	83	98	70.5	87.3	80.5	90.7	1
TGGT1_255260	High	IsMasterProtein	TGGT1_255260-t26_1-p1	transcript=TGGT1_255260-t26_1 | gene=TGGT1_255260 | organism=Toxoplasma_gondii_GT1 | gene_product=Apical membrane antigen AMA1 [Source:UniProtKB/TrEMBL;Acc:S7WI53] | transcript_product=apical membrane antigen AMA1 | location=TGGT1_chrVIIb:4856406-4860874(+) | protein_length=569 | sequence_SO=chromosome | SO=protein_coding_gene | is_pseudo=false	0	46.627	31	12	26	12	569	63	6.16	80.35	12	1.143	0.19	8.78875e-06	2812.7	2461	2.56	2.58	2873	2732.2	2845.9	2689.3	2857.8	2789.6	2835.9	2714.3	2441.9	2454.4	2570	2553.7	2421.6	2403.3	2541.1	2467.6	1
TGGT1_271250	High	IsMasterProtein	TGGT1_271250-t26_1-p1	transcript=TGGT1_271250-t26_1 | gene=TGGT1_271250 | organism=Toxoplasma_gondii_GT1 | gene_product=KH domain-containing protein [Source:UniProtKB/TrEMBL;Acc:A0A125YXT3] | transcript_product=hypothetical protein | location=TGGT1_chrVIII:4617477-4618996(-) | protein_length=418 | sequence_SO=chromosome | SO=protein_coding_gene | is_pseudo=false	0	13.085	11	4	4	4	418	47.9	5.57	11.3	4	1.143	0.19	0.0205702	166.2	145.5	8.25	7.7	169.7	171.5	194.5	158.6	161.4	168.3	164.1	146.2	145.7	130.6	155.8	162.1	135.4	139.3	157.8	145.3	1
TGGT1_311740	High	IsMasterProtein	TGGT1_311740-t26_1-p1	transcript=TGGT1_311740-t26_1 | gene=TGGT1_311740 | organism=Toxoplasma_gondii_GT1 | gene_product=hypothetical protein | transcript_product=hypothetical protein | location=TGGT1_chrXI:2202973-2208979(-) | protein_length=1583 | sequence_SO=chromosome | SO=protein_coding_gene | is_pseudo=false	0.003	3.813	1	1	1	1	1583	172.5	7.08	2.67	1	1.143	0.19	0.0871749	24.6	21.5	11.11	9.28	30.8	24.6	23.6	24.6	21.6	25.1	25.9	22.6	24.2	20	21.4	25.5	21.1	23.5	19.6	21.7	1
TGGT1_213660	High	IsMasterProtein	TGGT1_213660-t26_1-p1	transcript=TGGT1_213660-t26_1 | gene=TGGT1_213660 | organism=Toxoplasma_gondii_GT1 | gene_product=Zinc finger (CCCH type) motif-containing protein [Source:UniProtKB/TrEMBL;Acc:S7UPG3] | transcript_product=zinc finger (CCCH type) motif-containing protein | location=TGGT1_chrV:1080657-1085300(-) | protein_length=1220 | sequence_SO=chromosome | SO=protein_coding_gene | is_pseudo=false	0	14.668	5	5	6	5	1220	129.8	5.9	14.02	5	1.144	0.19	0.000497331	387.2	338.3	5.22	5.05	386.2	387.9	420.5	366.2	399.1	386.5	429.3	384.9	368	344.9	352.3	352.9	315	327.6	331.8	330	1
TGGT1_218230	Low	IsMasterProtein	TGGT1_218230-t26_1-p1	transcript=TGGT1_218230-t26_1 | gene=TGGT1_218230 | organism=Toxoplasma_gondii_GT1 | gene_product=SET domain-containing protein [Source:UniProtKB/TrEMBL;Acc:S7V1F4] | transcript_product=putative histone lysine methyltransferase, SET | location=TGGT1_chrXII:1599495-1601390(-) | protein_length=631 | sequence_SO=chromosome | SO=protein_coding_gene | is_pseudo=false	0.061	1.316	1	1	1	1	631	67.2	8.85	1.73	1	1.144	0.19	0.0336774	20.4	17.8	15.65	12.7	20.1	19.8	23.6	20	28.4	20.6	21.9	17.1	19.5	19.1	15.1	19	17.7	17.3	18	13.1	1
TGGT1_222230	High	IsMasterProtein	TGGT1_222230-t26_1-p1	transcript=TGGT1_222230-t26_1 | gene=TGGT1_222230 | organism=Toxoplasma_gondii_GT1 | gene_product=MMS19_N domain-containing protein [Source:UniProtKB/TrEMBL;Acc:S7UK88] | transcript_product=hypothetical protein | location=TGGT1_chrII:956224-964969(-) | protein_length=2494 | sequence_SO=chromosome | SO=protein_coding_gene | is_pseudo=false	0	27.865	5	11	12	11	2494	265.4	5.74	26.64	11	1.144	0.19	0.000298329	671.7	587	4.14	3.75	666	716.8	638.2	677.4	652.1	632.3	683.3	684.1	588.7	612.3	585.4	618	567.4	569.2	571.2	619.2	1
TGGT1_248700	High	IsMasterProtein	TGGT1_248700-t26_1-p1	transcript=TGGT1_248700-t26_1 | gene=TGGT1_248700 | organism=Toxoplasma_gondii_GT1 | gene_product=Alveolin domain containing intermediate filament IMC12 [Source:UniProtKB/TrEMBL;Acc:S7WGS9] | transcript_product=alveolin domain containing intermediate filament IMC12 | location=TGGT1_chrXII:4033434-4035280(+) | protein_length=277 | sequence_SO=chromosome | SO=protein_coding_gene | is_pseudo=false	0	23.788	25	7	16	7	277	29.8	5.34	55.24	7	1.144	0.19	0.000242043	2167.9	1894.6	4.24	1.88	2234	2097	2215.5	2066.1	2241.5	2026.5	2267	2121.4	1898.4	1861.6	1919.3	1936.1	1876.4	1890.8	1838.7	1939.5	1
TGGT1_306980	High	IsMasterProtein	TGGT1_306980-t26_1-p1	transcript=TGGT1_306980-t26_1 | gene=TGGT1_306980 | organism=Toxoplasma_gondii_GT1 | gene_product=hypothetical protein | transcript_product=hypothetical protein | location=TGGT1_chrXI:116443-118466(+) | protein_length=226 | sequence_SO=chromosome | SO=protein_coding_gene | is_pseudo=false	0.009	2.768	3	1	1	1	226	26.3	5.91	1.92	1	1.145	0.19	0.0309655	79.1	69.1	8.74	9.76	87.3	73.4	89.4	77.3	80.9	73	90.4	76.8	80.5	60.2	66.7	77.4	67.8	65.4	76.1	70.4	1
TGGT1_311905	High	IsMasterProtein	TGGT1_311905-t26_1-p1	transcript=TGGT1_311905-t26_1 | gene=TGGT1_311905 | organism=Toxoplasma_gondii_GT1 | gene_product=hypothetical protein | transcript_product=hypothetical protein | location=TGGT1_chrXI:2328086-2332891(+) | protein_length=714 | sequence_SO=chromosome | SO=protein_coding_gene | is_pseudo=false	0.001	6.414	3	2	2	2	714	76.2	8.28	5.68	2	1.145	0.19	0.0122897	65.8	57.5	6.07	11.53	69.7	58	65.7	66.4	63.1	65.7	71.1	65.8	61	46.2	55.3	60.5	59.7	48.2	48.8	60.6	1
TGGT1_313820	High	IsMasterProtein	TGGT1_313820-t26_1-p1	transcript=TGGT1_313820-t26_1 | gene=TGGT1_313820 | organism=Toxoplasma_gondii_GT1 | gene_product=Putative dynactin p25 [Source:UniProtKB/TrEMBL;Acc:S7UU39] | transcript_product=putative dynactin p25 | location=TGGT1_chrXI:3670473-3672329(-) | protein_length=618 | sequence_SO=chromosome | SO=protein_coding_gene | is_pseudo=false	0	21.209	30	7	9	7	618	66.4	4.78	20.21	7	1.145	0.19	0.000746337	985.8	861.2	5.71	2.54	1042.5	938.8	1018.9	936.7	1075.8	947.3	1047.3	953.8	821.2	867.8	861.6	896.4	868.9	860.9	860.3	840.7	1
TGGT1_211150	High	IsMasterProtein	TGGT1_211150-t26_1-p1	transcript=TGGT1_211150-t26_1 | gene=TGGT1_211150 | organism=Toxoplasma_gondii_GT1 | gene_product=hypothetical protein | transcript_product=hypothetical protein | location=TGGT1_chrIV:1850174-1859840(-) | protein_length=1948 | sequence_SO=chromosome | SO=protein_coding_gene | is_pseudo=false	0	11.94	4	6	6	6	1948	211	8.27	6.74	6	1.129	0.18	0.0323092	281.9	249.7	9.06	6.66	246.8	305.1	281.5	311.4	271.3	304.8	246.3	282.3	258.9	246.7	227.1	252.7	225.4	264.3	242.3	271	1
TGGT1_212150	High	IsMasterProtein	TGGT1_212150-t26_1-p1	transcript=TGGT1_212150-t26_1 | gene=TGGT1_212150 | organism=Toxoplasma_gondii_GT1 | gene_product=Cog4 domain-containing protein [Source:UniProtKB/TrEMBL;Acc:S7W4K6] | transcript_product=hypothetical protein | location=TGGT1_chrX:3912877-3924886(-) | protein_length=1178 | sequence_SO=chromosome | SO=protein_coding_gene | is_pseudo=false	0	16.079	5	6	7	6	1178	128.6	5.85	12.41	6	1.129	0.18	0.00120691	305.1	270.2	4.04	4.35	290.7	304.9	305.4	293	310.2	323.8	313.8	288.8	259.8	286.5	284.7	268.4	272.1	262.4	259.7	286.4	1
TGGT1_223130	Medium	IsMasterProtein	TGGT1_223130-t26_1-p1	transcript=TGGT1_223130-t26_1 | gene=TGGT1_223130 | organism=Toxoplasma_gondii_GT1 | gene_product=CHHC U11-48K-type domain-containing protein [Source:UniProtKB/TrEMBL;Acc:S7UL44] | transcript_product=hypothetical protein | location=TGGT1_chrII:1444931-1450329(-) | protein_length=923 | sequence_SO=chromosome | SO=protein_coding_gene | is_pseudo=false	0.05	1.416	1	1	1	1	923	100	6.83	1.82	1	1.129	0.18	0.452685	30.2	26.7	17.51	5.9	27.9	29.7	31.6	32.2	27.5	30.7	19.5	37.8	25.2	28.4	26.8	26.6	26	25.4	29	29.2	1
TGGT1_233530	Medium	IsMasterProtein	TGGT1_233530-t26_1-p1	transcript=TGGT1_233530-t26_1 | gene=TGGT1_233530 | organism=Toxoplasma_gondii_GT1 | gene_product=hypothetical protein | transcript_product=hypothetical protein | location=TGGT1_chrVIII:2692472-2696484(+) | protein_length=982 | sequence_SO=chromosome | SO=protein_coding_gene | is_pseudo=false	0.027	1.726	1	1	1	1	982	105.5	5.36	2.07	1	1.129	0.18	0.161672	35	31	7.29	14.59	34.6	36.9	33.6	37.3	36.8	32.4	30.1	35.3	29.9	27.7	24.5	29.8	32.1	32.2	40	33.5	1
TGGT1_259920	Medium	IsMasterProtein	TGGT1_259920-t26_1-p1	transcript=TGGT1_259920-t26_1 | gene=TGGT1_259920 | organism=Toxoplasma_gondii_GT1 | gene_product=G domain-containing protein [Source:UniProtKB/TrEMBL;Acc:S7W759] | transcript_product=Nitric-oxide synthase | location=TGGT1_chrVIIb:2585065-2593694(+) | protein_length=1263 | sequence_SO=chromosome | SO=protein_coding_gene | is_pseudo=false	0.016	2.261	1	1	1	1	1263	137.9	8.75	0	1	1.129	0.18	0.873479	8.5	7.6	40.15	18.51	12.1	10.6	10.1	4.9	3.5	8.2	4.7	9	9.6	NA	6.4	6.4	6.2	7.6	9.3	8.3	1
TGGT1_261660	High	IsMasterProtein	TGGT1_261660-t26_1-p1	transcript=TGGT1_261660-t26_1 | gene=TGGT1_261660 | organism=Toxoplasma_gondii_GT1 | gene_product=hypothetical protein | transcript_product=hypothetical protein | location=TGGT1_chrVIIb:1573503-1583169(-) | protein_length=2679 | sequence_SO=chromosome | SO=protein_coding_gene | is_pseudo=false	0.001	7.203	1	2	2	1	2679	290.8	7.4	6.34	2	1.129	0.18	0.0943677	29	25.7	14.84	9.63	35.5	26.6	25.9	31.6	36.4	32.1	25.7	26.4	29.8	26.5	23.7	24.8	24	27.7	22.6	28	1
TGGT1_281580	High	IsMasterProtein	TGGT1_281580-t26_1-p1	transcript=TGGT1_281580-t26_1 | gene=TGGT1_281580 | organism=Toxoplasma_gondii_GT1 | gene_product=PPM-type phosphatase domain-containing protein [Source:UniProtKB/TrEMBL;Acc:S7UVM5] | transcript_product=putative PP2C | location=TGGT1_chrVIIa:4108637-4114767(+) | protein_length=673 | sequence_SO=chromosome | SO=protein_coding_gene | is_pseudo=false	0	41.269	24	13	22	13	673	71.8	6.14	65.97	13	1.129	0.18	0.00123691	1931.6	1710.4	5.44	3.73	1816	2036.5	1861.9	1999.8	1821.3	2088.6	1872.2	1992.8	1650	1756.3	1653.8	1746.9	1616.4	1770.3	1674.7	1777.7	1
TGGT1_310802	High	IsMasterProtein	TGGT1_310802-t26_1-p1	transcript=TGGT1_310802-t26_1 | gene=TGGT1_310802 | organism=Toxoplasma_gondii_GT1 | gene_product=CRAL-TRIO domain-containing protein [Source:UniProtKB/TrEMBL;Acc:S7W265] | transcript_product=CRAL/TRIO domain-containing protein | location=TGGT1_chrXI:1562990-1566501(+) | protein_length=499 | sequence_SO=chromosome | SO=protein_coding_gene | is_pseudo=false	0	25.991	20	9	11	9	499	55.7	8.79	22.38	9	1.129	0.18	3.2507e-08	1094.4	969.3	1.6	1.57	1095.9	1141.2	1095.5	1086.4	1089.5	1093.2	1090.5	1098	937.6	977.5	972	986.4	954.1	966.7	975	966	1
TGGT1_202120	High	IsMasterProtein	TGGT1_202120-t26_1-p1	transcript=TGGT1_202120-t26_1 | gene=TGGT1_202120 | organism=Toxoplasma_gondii_GT1 | gene_product=PH domain-containing protein [Source:UniProtKB/TrEMBL;Acc:S7UV62] | transcript_product=hypothetical protein | location=TGGT1_chrVIIa:3483252-3507091(-) | protein_length=1323 | sequence_SO=chromosome | SO=protein_coding_gene | is_pseudo=false	0	26.919	8	10	12	10	1323	147.2	5.69	23.65	10	1.13	0.18	0.000119624	745.4	659.9	3.81	3.17	706	761.8	733.4	785.8	715.8	767.5	722.5	757.7	667.5	672.3	677.1	684.1	630	642.1	633	652.4	1
TGGT1_212840	High	IsMasterProtein	TGGT1_212840-t26_1-p1	transcript=TGGT1_212840-t26_1 | gene=TGGT1_212840 | organism=Toxoplasma_gondii_GT1 | gene_product=HIT-type domain-containing protein [Source:UniProtKB/TrEMBL;Acc:S7VX77] | transcript_product=HIT zinc finger protein | location=TGGT1_chrV:509275-514927(-) | protein_length=588 | sequence_SO=chromosome | SO=protein_coding_gene | is_pseudo=false	0	21.351	13	6	9	6	588	64.5	5.47	19.21	6	1.13	0.18	0.00294564	463.5	410.3	5.51	4.33	463.6	434.8	470.4	463.4	491.1	477.5	445.7	412.5	415.4	411.7	372.5	421.7	391	427.4	406.5	408.9	1
TGGT1_254030	High	IsMasterProtein	TGGT1_254030-t26_1-p1	transcript=TGGT1_254030-t26_1 | gene=TGGT1_254030 | organism=Toxoplasma_gondii_GT1 | gene_product=Zinc finger CDGSH-type domain-containing protein [Source:UniProtKB/TrEMBL;Acc:A0A125YQF1] | transcript_product=zinc finger CDGSH-type domain-containing protein | location=TGGT1_chrIII:1400455-1401708(+) | protein_length=118 | sequence_SO=chromosome | SO=protein_coding_gene | is_pseudo=false	0.001	7.698	14	1	2	1	118	13.2	8.56	6.54	1	1.13	0.18	0.00294564	195.1	172.7	5.69	4.68	213	195.4	205.5	184.7	178.8	194.8	196.4	187.7	181	156.8	177.7	180.7	168.4	169.8	175.7	169.4	1
TGGT1_254110	High	IsMasterProtein	TGGT1_254110-t26_1-p1	transcript=TGGT1_254110-t26_1 | gene=TGGT1_254110 | organism=Toxoplasma_gondii_GT1 | gene_product=Tryptophanyl-tRNA synthetase (TrpRS1) [Source:UniProtKB/TrEMBL;Acc:S7UMR2] | transcript_product=tryptophanyl-tRNA synthetase (TrpRS1) | location=TGGT1_chrIII:1430315-1436343(+) | protein_length=835 | sequence_SO=chromosome | SO=protein_coding_gene | is_pseudo=false	0	7.834	5	3	4	3	835	90.4	8.44	7.37	3	1.13	0.18	0.000457973	174.6	154.5	5.88	5.48	186.4	173.1	194.5	176.1	193.3	166.4	172.8	172.5	157.7	157.9	151.3	159.4	136.6	143.8	158.1	147.4	1
TGGT1_300220	High	IsMasterProtein	TGGT1_300220-t26_1-p1	transcript=TGGT1_300220-t26_1 | gene=TGGT1_300220 | organism=Toxoplasma_gondii_GT1 | gene_product=hypothetical protein | transcript_product=hypothetical protein | location=TGGT1_chrXII:108727-118989(-) | protein_length=1823 | sequence_SO=chromosome | SO=protein_coding_gene | is_pseudo=false	0.001	5.423	1	2	2	2	1823	205.6	9.32	5.08	2	1.13	0.18	0.0841178	86	76.1	10.6	10.02	82.1	98.4	85.8	77.1	77.6	101.8	86.2	94.5	72.2	87.5	76.6	75.4	68.4	75.7	76.7	91.9	1
TGGT1_315230	High	IsMasterProtein	TGGT1_315230-t26_1-p1	transcript=TGGT1_315230-t26_1 | gene=TGGT1_315230 | organism=Toxoplasma_gondii_GT1 | gene_product=hypothetical protein | transcript_product=hypothetical protein | location=TGGT1_chrXI:4540396-4542282(+) | protein_length=628 | sequence_SO=chromosome | SO=protein_coding_gene | is_pseudo=false	0	8.63	6	4	5	4	628	68.2	7.03	4.47	4	1.13	0.18	0.0106534	73.2	64.7	6.91	7.83	69.9	81.5	66.1	73.2	70.8	73.2	79.9	74.7	61.7	70.4	58	57.5	62.6	67	67.9	69	1
TGGT1_249920	High	IsMasterProtein	TGGT1_249920-t26_1-p1	transcript=TGGT1_249920-t26_1 | gene=TGGT1_249920 | organism=Toxoplasma_gondii_GT1 | gene_product=TP_methylase domain-containing protein [Source:UniProtKB/TrEMBL;Acc:A0A125YLL8] | transcript_product=putative diphthine synthase | location=TGGT1_chrXII:4878894-4881036(+) | protein_length=275 | sequence_SO=chromosome | SO=protein_coding_gene | is_pseudo=false	0	19.333	21	7	13	7	275	30.6	5.94	26.49	7	1.131	0.18	0.000194843	1192.3	1054.4	3.98	2.58	1240.9	1116.9	1251.2	1156.6	1235.1	1159.4	1196.5	1188.1	1051	1077.5	1091.3	1042.4	1093.9	1014.3	1041.7	1057.8	1
TGGT1_254365	High	IsMasterProtein	TGGT1_254365-t26_1-p1	transcript=TGGT1_254365-t26_1 | gene=TGGT1_254365 | organism=Toxoplasma_gondii_GT1 | gene_product=Phosphatidate cytidylyltransferase [Source:UniProtKB/TrEMBL;Acc:S7W1Z3] | transcript_product=phosphatidate cytidylyltransferase | location=TGGT1_chrIII:1628991-1631247(+) | protein_length=255 | sequence_SO=chromosome | SO=protein_coding_gene | is_pseudo=false	0.009	2.818	4	1	2	1	255	27.5	8.31	5.32	1	1.131	0.18	0.00334663	234.1	207	5.2	4.62	228	248.3	244.4	240.4	228	244.3	215.2	221.7	226.2	200	198.9	202.8	212.8	207.6	219.6	206.3	1
TGGT1_297780	High	IsMasterProtein	TGGT1_297780-t26_1-p1	transcript=TGGT1_297780-t26_1 | gene=TGGT1_297780 | organism=Toxoplasma_gondii_GT1 | gene_product=DNA topoisomerase 2 [Source:UniProtKB/TrEMBL;Acc:S7VTJ5] | transcript_product=ATPase/histidine kinase/DNA gyrase B/HSP90 domain-containing protein | location=TGGT1_chrII:1965698-1975996(+) | protein_length=1386 | sequence_SO=chromosome | SO=protein_coding_gene | is_pseudo=false	0	20.474	6	7	11	7	1386	148.2	8.73	15.64	7	1.131	0.18	0.152047	252	222.8	8.56	5.9	257.3	246.7	258.9	215.8	265.9	231	269.4	219.1	216.7	217.4	245.4	226.2	219.5	237.4	246.9	213.8	1
TGGT1_248270	High	IsMasterProtein	TGGT1_248270-t26_1-p1	transcript=TGGT1_248270-t26_1 | gene=TGGT1_248270 | organism=Toxoplasma_gondii_GT1 | gene_product=Zinc finger (CCCH type) motif-containing protein [Source:UniProtKB/TrEMBL;Acc:S7WGM1] | transcript_product=zinc finger (CCCH type) motif-containing protein | location=TGGT1_chrXII:3703436-3706196(+) | protein_length=818 | sequence_SO=chromosome | SO=protein_coding_gene | is_pseudo=false	0	15.703	7	6	13	6	818	87.6	8.16	30.13	6	1.132	0.18	0.000110538	1248.3	1102.5	2.48	3.59	1300.7	1256.4	1259.6	1230.5	1270.4	1195.8	1235.3	1240.2	1099.6	1084.7	1082.8	1177.8	1070.7	1127.1	1105.5	1169	1
TGGT1_260825	High	IsMasterProtein	TGGT1_260825-t26_1-p1	transcript=TGGT1_260825-t26_1 | gene=TGGT1_260825 | organism=Toxoplasma_gondii_GT1 | gene_product=hypothetical protein | transcript_product=hypothetical protein | location=TGGT1_chrVIIb:1996744-1997638(-) | protein_length=92 | sequence_SO=chromosome | SO=protein_coding_gene | is_pseudo=false	0.003	3.858	12	1	1	1	92	10.2	9.25	3.31	1	1.132	0.18	0.00596168	202.4	178.8	8.37	8.69	180.7	193.4	203.6	232.8	201.3	209.7	195.4	226.2	177.8	182.4	168.4	179.8	141.6	159	184.1	182.2	1
TGGT1_261520	High	IsMasterProtein	TGGT1_261520-t26_1-p1	transcript=TGGT1_261520-t26_1 | gene=TGGT1_261520 | organism=Toxoplasma_gondii_GT1 | gene_product=OBG-type G domain-containing protein [Source:UniProtKB/TrEMBL;Acc:S7UYA0] | transcript_product=putative nucleolar GTP-binding protein 1 | location=TGGT1_chrVIIb:1646922-1654757(-) | protein_length=719 | sequence_SO=chromosome | SO=protein_coding_gene | is_pseudo=false	0	28.323	15	11	12	11	719	80.9	9.7	19.89	11	1.132	0.18	0.0188465	861.1	760.4	8.8	3.41	920.8	823.4	952.6	786.5	948.1	773.5	900.5	793.2	802.7	732.2	785.1	755.1	759.5	722.3	761.3	763.8	1
TGGT1_268880	High	IsMasterProtein	TGGT1_268880-t26_1-p1	transcript=TGGT1_268880-t26_1 | gene=TGGT1_268880 | organism=Toxoplasma_gondii_GT1 | gene_product=hypothetical protein | transcript_product=hypothetical protein | location=TGGT1_chrVIII:6230647-6234052(-) | protein_length=400 | sequence_SO=chromosome | SO=protein_coding_gene | is_pseudo=false	0.003	4.564	5	2	2	2	400	44	8.27	2.27	2	1.132	0.18	0.00103157	185.7	164.1	4.96	3.33	171.3	189.2	178.2	173.5	190.8	195.3	182.2	192.5	169.3	169.7	159.3	162.5	165.6	160.7	166.3	153.6	1
TGGT1_269740	High	IsMasterProtein	TGGT1_269740-t26_1-p1	transcript=TGGT1_269740-t26_1 | gene=TGGT1_269740 | organism=Toxoplasma_gondii_GT1 | gene_product=R3H domain-containing protein [Source:UniProtKB/TrEMBL;Acc:S7WKQ6] | transcript_product=R3H domain-containing protein | location=TGGT1_chrVIII:5628764-5632983(+) | protein_length=1307 | sequence_SO=chromosome | SO=protein_coding_gene | is_pseudo=false	0	14.321	5	6	7	6	1307	142.8	8.43	16.02	6	1.132	0.18	0.00245317	364.5	321.9	4.55	5.17	352.6	356	375.7	376.5	375.9	339.2	373.2	339	350.5	300.1	311.4	325.4	334	318.5	331.7	305.4	1
TGGT1_290630	High	IsMasterProtein	TGGT1_290630-t26_1-p1	transcript=TGGT1_290630-t26_1 | gene=TGGT1_290630 | organism=Toxoplasma_gondii_GT1 | gene_product=AP2/ERF domain-containing protein [Source:UniProtKB/TrEMBL;Acc:S7UP83] | transcript_product=AP2 domain transcription factor AP2IX-7 | location=TGGT1_chrIX:3593432-3601897(+) | protein_length=2671 | sequence_SO=chromosome | SO=protein_coding_gene | is_pseudo=false	0.003	4.371	1	2	2	2	2671	278.5	8.21	2.1	2	1.132	0.18	0.890123	15.2	13.4	25.1	23.26	14.3	18.4	20	8	13.5	17.9	13.1	16.1	15	19.5	11.8	11.6	11.8	13.9	12.9	20	1
TGGT1_305020	High	IsMasterProtein	TGGT1_305020-t26_1-p1	transcript=TGGT1_305020-t26_1 | gene=TGGT1_305020 | organism=Toxoplasma_gondii_GT1 | gene_product=CS domain-containing protein [Source:UniProtKB/TrEMBL;Acc:S7UI63] | transcript_product=hypothetical protein | location=TGGT1_chrIX:4944513-4957394(+) | protein_length=1564 | sequence_SO=chromosome | SO=protein_coding_gene | is_pseudo=false	0.001	5.91	1	2	2	2	1564	172.1	7.44	5.21	2	1.132	0.18	0.370722	75.6	66.8	11.92	11.95	60.7	75.9	80.6	67.4	81.8	87.9	75.3	67.9	79.1	61.7	64.3	69.3	62	61.3	80.7	76.6	1
TGGT1_313150	High	IsMasterProtein	TGGT1_313150-t26_1-p1	transcript=TGGT1_313150-t26_1 | gene=TGGT1_313150 | organism=Toxoplasma_gondii_GT1 | gene_product=Sugar phosphate phosphatase [Source:UniProtKB/TrEMBL;Acc:S7UTJ0] | transcript_product=DUF89/Fructose bisphosphatase | location=TGGT1_chrXI:3102924-3106015(-) | protein_length=551 | sequence_SO=chromosome | SO=protein_coding_gene | is_pseudo=false	0	14.612	12	6	6	6	551	61.9	5.54	10.72	6	1.132	0.18	0.00103793	576	508.8	3.02	5.04	607.7	554	592.2	567.2	580.5	575.9	576	559.4	509.7	477.5	527.3	552.3	501.7	483.3	537.7	507.9	1
TGGT1_315120	High	IsMasterProtein	TGGT1_315120-t26_1-p1	transcript=TGGT1_315120-t26_1 | gene=TGGT1_315120 | organism=Toxoplasma_gondii_GT1 | gene_product=hypothetical protein | transcript_product=hypothetical protein | location=TGGT1_chrXI:4429993-4431988(+) | protein_length=272 | sequence_SO=chromosome | SO=protein_coding_gene | is_pseudo=false	0.001	6.841	10	2	3	2	272	28.9	5.22	7.65	2	1.132	0.18	0.0325033	86.3	76.2	8.21	6.69	93.8	93.3	90.8	79.1	76.6	77.7	84.5	88.1	85.1	71.2	78.8	80	69.8	73.6	78.3	74.1	1
TGGT1_320180	High	IsMasterProtein	TGGT1_320180-t26_1-p1	transcript=TGGT1_320180-t26_1 | gene=TGGT1_320180 | organism=Toxoplasma_gondii_GT1 | gene_product=SAG-related sequence SRS16C [Source:UniProtKB/TrEMBL;Acc:A0A125YV21] | transcript_product=SAG-related sequence SRS16C | location=TGGT1_chrIV:388819-390015(-) | protein_length=398 | sequence_SO=chromosome | SO=protein_coding_gene | is_pseudo=false	0	15.393	12	6	7	6	398	42.3	5.81	14.81	6	1.132	0.18	1.6399e-06	1219.6	1077.7	2.35	2.27	1200.5	1200.7	1202	1229.6	1265.1	1260.7	1209.8	1257.5	1055	1101.9	1067.9	1080.4	1107.5	1122.2	1057.5	1075	1
TGGT1_200310	High	IsMasterProtein	TGGT1_200310-t26_1-p1	transcript=TGGT1_200310-t26_1 | gene=TGGT1_200310 | organism=Toxoplasma_gondii_GT1 | gene_product=hypothetical protein | transcript_product=hypothetical protein | location=TGGT1_chrVIII:6769899-6771950(-) | protein_length=169 | sequence_SO=chromosome | SO=protein_coding_gene | is_pseudo=false	0	13.462	22	5	17	5	169	18.8	10.11	31.93	5	1.133	0.18	0.0117379	2370	2092.7	7.25	4.86	2501.4	2189.3	2502	2226.4	2577.1	2245.6	2575.8	2226.2	2098.4	2087	2176	2001.4	2340.7	2082.3	2120.8	2047.5	1
TGGT1_208350	High	IsMasterProtein	TGGT1_208350-t26_1-p1	transcript=TGGT1_208350-t26_1 | gene=TGGT1_208350 | organism=Toxoplasma_gondii_GT1 | gene_product=RRM domain-containing protein [Source:UniProtKB/TrEMBL;Acc:S7UJU6] | transcript_product=hypothetical protein | location=TGGT1_chrIb:640587-643083(-) | protein_length=369 | sequence_SO=chromosome | SO=protein_coding_gene | is_pseudo=false	0	26.3	31	10	10	10	369	40	9.45	24.51	10	1.133	0.18	0.00393446	663.5	585.8	5.85	4.57	682.1	609.2	675.1	627.1	692.6	652.1	720.1	623.4	621.3	559.6	603.9	568.7	622.6	552.2	588.4	583.2	1	Methylthio [C143]
TGGT1_248670	High	IsMasterProtein	TGGT1_248670-t26_1-p1	transcript=TGGT1_248670-t26_1 | gene=TGGT1_248670 | organism=Toxoplasma_gondii_GT1 | gene_product=V-type H(+)-translocating pyrophosphatase VP1 [Source:UniProtKB/TrEMBL;Acc:A0A125YIK4] | transcript_product=V-type H(+)-translocating pyrophosphatase VP1 | location=TGGT1_chrXII:4005858-4010809(+) | protein_length=816 | sequence_SO=chromosome | SO=protein_coding_gene | is_pseudo=false	0	15.435	7	5	5	5	816	85.2	5.21	12.05	5	1.133	0.18	0.00228814	355.6	313.8	5.41	2.91	377.7	329.5	360.7	347.9	376.1	350.5	369.5	329.3	313.3	311.7	314.3	307.1	327.5	334.1	315.4	310.5	1
TGGT1_257040	High	IsMasterProtein	TGGT1_257040-t26_1-p1	transcript=TGGT1_257040-t26_1 | gene=TGGT1_257040 | organism=Toxoplasma_gondii_GT1 | gene_product=TB2/DP1, HVA22 family protein [Source:UniProtKB/TrEMBL;Acc:A0A125YT50] | transcript_product=TB2/DP1, HVA22 family protein | location=TGGT1_chrVIIb:4200936-4202881(+) | protein_length=217 | sequence_SO=chromosome | SO=protein_coding_gene | is_pseudo=false	0	15.931	29	4	6	4	217	24	6.16	16.23	4	1.133	0.18	0.0102033	544.6	480.7	7.57	4.16	469.1	583.6	519.3	599	525.4	554	535.3	567.4	482.5	487	474.7	479	445.1	495.7	464.7	511.8	1	Methylthio [C17]
TGGT1_260510	High	IsMasterProtein	TGGT1_260510-t26_1-p1	transcript=TGGT1_260510-t26_1 | gene=TGGT1_260510 | organism=Toxoplasma_gondii_GT1 | gene_product=OTU domain-containing protein [Source:UniProtKB/TrEMBL;Acc:S7W793] | transcript_product=ubiquitin thioesterase otubain-like family protein | location=TGGT1_chrVIIb:2169648-2172792(-) | protein_length=394 | sequence_SO=chromosome | SO=protein_coding_gene | is_pseudo=false	0	13.917	16	4	4	4	394	44.4	5.03	12.45	4	1.133	0.18	0.00618981	326.9	288.6	6.16	4.7	350.1	320.4	329.1	300.3	337.4	297.9	351	324.7	295.3	303.2	285.9	291.3	278.3	274.5	316.6	285.1	1
TGGT1_266900	Medium	IsMasterProtein	TGGT1_266900-t26_1-p1	transcript=TGGT1_266900-t26_1 | gene=TGGT1_266900 | organism=Toxoplasma_gondii_GT1 | gene_product=Cyclin N-terminal domain-containing protein [Source:UniProtKB/TrEMBL;Acc:A0A125YJQ0] | transcript_product=cyclin, N-terminal domain-containing protein | location=TGGT1_chrIX:744473-745863(+) | protein_length=257 | sequence_SO=chromosome | SO=protein_coding_gene | is_pseudo=false	0.011	2.663	4	1	1	1	257	29.1	4.75	2.16	1	1.133	0.18	0.04086	142.9	126.1	10.34	7.91	161.5	152.4	129.4	163.8	133.8	124.6	149.6	136.4	108.3	126.5	121.4	135.7	125.8	117.8	134	137.7	1
TGGT1_285980A	High	IsMasterProtein	TGGT1_285980A-t26_1-p1	transcript=TGGT1_285980A-t26_1 | gene=TGGT1_285980A | organism=Toxoplasma_gondii_GT1 | gene_product=Glucosephosphate-mutase GPM1 [Source:UniProtKB/TrEMBL;Acc:S7UNX7] | transcript_product=glucosephosphate-mutase GPM1 | location=TGGT1_chrV:1947082-1953082(-) | protein_length=361 | sequence_SO=chromosome | SO=protein_coding_gene | is_pseudo=false	0	39.44	42	10	22	10	361	39.3	6.61	60.73	10	1.133	0.18	0.00156794	1744.9	1539.7	4.94	3.53	1706	1784.7	1612.6	1806	1643.9	1790.4	1657.6	1838.5	1493.3	1501.9	1482.9	1571.7	1538	1619.1	1541.5	1624.3	1	Methylthio [C89; C340]
TGGT1_364330	Low	IsMasterProtein	TGGT1_364330-t26_1-p1	transcript=TGGT1_364330-t26_1 | gene=TGGT1_364330 | organism=Toxoplasma_gondii_GT1 | gene_product=hypothetical protein | transcript_product=hypothetical protein | location=TGGT1_chrV:2827025-2828331(-) | protein_length=264 | sequence_SO=chromosome | SO=protein_coding_gene | is_pseudo=false	0.075	1.224	2	1	1	1	264	29	8.78	0	1	1.133	0.18	0.0343522	101.5	89.5	6.53	9.09	98.1	92.7	111.7	104.6	92.1	104.5	99.5	103.4	76.6	103.2	97	83	91.6	88.6	90.5	87.2	1
TGGT1_209190	High	IsMasterProtein	TGGT1_209190-t26_1-p1	transcript=TGGT1_209190-t26_1 | gene=TGGT1_209190 | organism=Toxoplasma_gondii_GT1 | gene_product=ABC transporter transmembrane region domain-containing protein [Source:UniProtKB/TrEMBL;Acc:S7VXW5] | transcript_product=ABC transporter transmembrane region domain-containing protein | location=TGGT1_chrIb:1120264-1125110(-) | protein_length=798 | sequence_SO=chromosome | SO=protein_coding_gene | is…	0	59.266	29	19	23	19	798	85.5	7.75	68.17	19	1.134	0.18	1.86373e-05	1248.7	1100.9	3	3.18	1320.9	1228.9	1264.1	1216.5	1265.9	1233.5	1293.7	1219	1140.2	1063.1	1071.7	1149	1063.9	1082.6	1119.5	1120.9	1
TGGT1_222910	High	IsMasterProtein	TGGT1_222910-t26_1-p1	transcript=TGGT1_222910-t26_1 | gene=TGGT1_222910 | organism=Toxoplasma_gondii_GT1 | gene_product=Phosphoglycerate mutase [Source:UniProtKB/TrEMBL;Acc:A0A125YIL9] | transcript_product=phosphoglycerate mutase | location=TGGT1_chrII:1286783-1290854(+) | protein_length=514 | sequence_SO=chromosome | SO=protein_coding_gene | is_pseudo=false	0	28.053	16	6	14	6	514	55.9	8.34	45.66	6	1.134	0.18	9.98962e-05	1190.9	1050.3	3.08	3.5	1164.4	1220	1147.2	1194.5	1159.2	1187.3	1212	1258.4	1019.6	1084.6	1046.7	1040.1	1053.9	1116.2	1022.8	1107.7	1
TGGT1_227020	High	IsMasterProtein	TGGT1_227020-t26_1-p1	transcript=TGGT1_227020-t26_1 | gene=TGGT1_227020 | organism=Toxoplasma_gondii_GT1 | gene_product=Deacetylase sirtuin-type domain-containing protein [Source:UniProtKB/TrEMBL;Acc:A0A125YGL0] | transcript_product=histone deacetylase SIR2 | location=TGGT1_chrX:1038642-1042339(-) | protein_length=360 | sequence_SO=chromosome | SO=protein_coding_gene | is_pseudo=false	0	11	8	2	3	2	360	40	8.22	11.27	2	1.134	0.18	0.0019293	286.8	253	5.7	6.56	271.2	271.7	307.9	293	269.6	305.5	280.7	302.7	251.5	236.3	239	257.5	214.8	254.5	257.9	264.8	1
TGGT1_244660	Medium	IsMasterProtein	TGGT1_244660-t26_1-p1	transcript=TGGT1_244660-t26_1 | gene=TGGT1_244660 | organism=Toxoplasma_gondii_GT1 | gene_product=hypothetical protein | transcript_product=hypothetical protein | location=TGGT1_chrVI:3346997-3353969(+) | protein_length=1330 | sequence_SO=chromosome | SO=protein_coding_gene | is_pseudo=false	0.016	2.272	1	1	1	1	1330	142.8	9.85	2.15	1	1.134	0.18	0.0405628	205.5	181.3	4.26	7.49	202.3	212.5	197.6	210.9	196.9	188.6	211.2	208.9	180.9	175.9	205.4	205.1	181.6	198	171.9	174.3	1
TGGT1_249010	High	IsMasterProtein	TGGT1_249010-t26_1-p1	transcript=TGGT1_249010-t26_1 | gene=TGGT1_249010 | organism=Toxoplasma_gondii_GT1 | gene_product=Protein-lysine N-methyltransferase TGGT1_249010 [Source:UniProtKB/TrEMBL;Acc:S7V0W7] | transcript_product=hypothetical protein | location=TGGT1_chrXII:4231443-4233065(-) | protein_length=540 | sequence_SO=chromosome | SO=protein_coding_gene | is_pseudo=false	0	9.105	9	4	4	4	540	59.1	5.44	7.72	4	1.134	0.18	0.453571	112.4	99.1	8.8	7.06	92.5	114.9	113.4	95.3	115.1	111.3	101.1	114.2	110.9	99.5	94.5	108.1	98.5	114.1	98.7	97.1	1
TGGT1_258630	High	IsMasterProtein	TGGT1_258630-t26_1-p1	transcript=TGGT1_258630-t26_1 | gene=TGGT1_258630 | organism=Toxoplasma_gondii_GT1 | gene_product=hypothetical protein | transcript_product=hypothetical protein | location=TGGT1_chrVIIb:3258493-3261947(-) | protein_length=540 | sequence_SO=chromosome | SO=protein_coding_gene | is_pseudo=false	0.001	7.119	5	2	2	2	540	58.2	9.67	5.66	2	1.134	0.18	0.00775765	145.6	128.4	6.74	4.77	150.1	146	155.3	128.3	134.5	145.1	153	135.5	118	128.9	130.4	124	132.4	127.8	136.5	121.1	1
TGGT1_262933	Low	IsMasterProtein	TGGT1_262933-t26_1-p1	transcript=TGGT1_262933-t26_1 | gene=TGGT1_262933 | organism=Toxoplasma_gondii_GT1 | gene_product=hypothetical protein | transcript_product=hypothetical protein | location=TGGT1_chrVIIb:888435-891670(-) | protein_length=666 | sequence_SO=chromosome | SO=protein_coding_gene | is_pseudo=false	0.067	1.269	2	1	1	1	666	72.4	9.63	0	1	1.134	0.18	0.264324	42.2	37.2	13.94	16.1	32.6	50.2	47.6	39.7	35.3	42	42.8	42.4	32.3	29.1	33.3	37.1	41.1	38.9	37.3	48.5	1
TGGT1_285520	High	IsMasterProtein	TGGT1_285520-t26_1-p1	transcript=TGGT1_285520-t26_1 | gene=TGGT1_285520 | organism=Toxoplasma_gondii_GT1 | gene_product=RNA cap guanine-N2 methyltransferase [Source:UniProtKB/TrEMBL;Acc:S7W2Y1] | transcript_product=RNA cap guanine-N2 methyltransferase | location=TGGT1_chrV:2204953-2213630(+) | protein_length=1659 | sequence_SO=chromosome | SO=protein_coding_gene | is_pseudo=false	0	19.757	4	6	6	6	1659	181.4	6.44	17.08	6	1.134	0.18	0.000738216	241.7	213.1	4.32	4.13	248.8	240.7	254.6	224.3	254.3	234.7	235.7	242.6	208.6	208.2	206.1	215	215.2	229.8	211.1	227.3	1
TGGT1_320740	High	IsMasterProtein	TGGT1_320740-t26_1-p1	transcript=TGGT1_320740-t26_1 | gene=TGGT1_320740 | organism=Toxoplasma_gondii_GT1 | gene_product=hypothetical protein | transcript_product=hypothetical protein | location=TGGT1_chrIV:49028-51614(+) | protein_length=333 | sequence_SO=chromosome | SO=protein_coding_gene | is_pseudo=false	0	33.497	31	9	17	9	333	36.9	5.6	42.77	9	1.134	0.18	3.68854e-07	1829.8	1614.2	1.25	2.02	1809.5	1868.2	1809	1839.3	1827.8	1831.7	1805.3	1855	1567.4	1642.3	1594.6	1644	1633.9	1643.6	1584.7	1581.6	1
TGGT1_213610	High	IsMasterProtein	TGGT1_213610-t26_1-p1	transcript=TGGT1_213610-t26_1 | gene=TGGT1_213610 | organism=Toxoplasma_gondii_GT1 | gene_product=hypothetical protein | transcript_product=hypothetical protein | location=TGGT1_chrV:1039260-1044139(-) | protein_length=1015 | sequence_SO=chromosome | SO=protein_coding_gene | is_pseudo=false	0	70.408	22	19	31	19	1015	111.2	4.81	80.22	19	1.135	0.18	0.000564671	2632.4	2319.1	4.64	1.88	2560.8	2706	2527.8	2752.8	2442.1	2743.9	2520.2	2718.3	2316.3	2359.1	2244	2340.3	2265.8	2352.1	2270.1	2321.9	1
TGGT1_230820	High	IsMasterProtein	TGGT1_230820-t26_1-p1	transcript=TGGT1_230820-t26_1 | gene=TGGT1_230820 | organism=Toxoplasma_gondii_GT1 | gene_product=hypothetical protein | transcript_product=hypothetical protein | location=TGGT1_chrVIII:998534-1000300(+) | protein_length=524 | sequence_SO=chromosome | SO=protein_coding_gene | is_pseudo=false	0.003	4.185	6	2	2	2	524	58.2	6.48	1.84	2	1.135	0.18	0.0253267	88.7	78.1	9.56	6.09	83.9	105.4	90.5	88.3	76.3	84.7	94.2	89	74.4	72.7	73.7	84.9	77.8	85.1	78.4	78.5	1
TGGT1_247040	High	IsMasterProtein	TGGT1_247040-t26_1-p1	transcript=TGGT1_247040-t26_1 | gene=TGGT1_247040 | organism=Toxoplasma_gondii_GT1 | gene_product=hypothetical protein | transcript_product=hypothetical protein | location=TGGT1_chrXII:3051933-3058222(-) | protein_length=1140 | sequence_SO=chromosome | SO=protein_coding_gene | is_pseudo=false	0	12.25	4	4	5	4	1140	120.7	10.01	16.33	4	1.135	0.18	0.0178216	131.9	116.2	9.71	6.97	162	131.9	135.4	130.2	131.9	128.3	140.3	116.3	121	112.2	104.2	112.1	114.1	131.9	118.4	119.4	1
TGGT1_253030	High	IsMasterProtein	TGGT1_253030-t26_1-p1	transcript=TGGT1_253030-t26_1 | gene=TGGT1_253030 | organism=Toxoplasma_gondii_GT1 | gene_product=Gal_mutarotas_2 domain-containing protein [Source:UniProtKB/TrEMBL;Acc:S7UN63] | transcript_product=glycosyl hydrolase, family 31 protein | location=TGGT1_chrIII:670627-683291(+) | protein_length=1613 | sequence_SO=chromosome | SO=protein_coding_gene | is_pseudo=false	0.001	5.585	2	2	2	2	1613	182.8	6.35	2.66	2	1.135	0.18	0.133264	113.8	100.3	8.24	8.54	95.6	124.1	123.7	108.1	107.7	113.4	116.3	114.2	109.8	97.3	96.3	117.4	93.9	98.2	102.4	113.7	1
TGGT1_285180	High	IsMasterProtein	TGGT1_285180-t26_1-p1	transcript=TGGT1_285180-t26_1 | gene=TGGT1_285180 | organism=Toxoplasma_gondii_GT1 | gene_product=hypothetical protein | transcript_product=hypothetical protein | location=TGGT1_chrV:2405955-2411632(+) | protein_length=632 | sequence_SO=chromosome | SO=protein_coding_gene | is_pseudo=false	0	25.776	12	6	14	6	632	69.7	6.6	48.37	6	1.135	0.18	0.000210389	874.1	770.1	2.11	3.83	872.2	881.6	876.1	865.8	850.9	901.5	885.6	845.2	826.1	764.2	764.8	817	743.2	752.4	790.6	775.4	1
TGGT1_216720	High	IsMasterProtein	TGGT1_216720-t26_1-p1	transcript=TGGT1_216720-t26_1 | gene=TGGT1_216720 | organism=Toxoplasma_gondii_GT1 | gene_product=hypothetical protein | transcript_product=hypothetical protein | location=TGGT1_chrXI:5865264-5865815(+) | protein_length=183 | sequence_SO=chromosome | SO=protein_coding_gene | is_pseudo=false	0	10.325	14	4	6	4	183	20	6.54	14.55	4	1.136	0.18	9.33869e-05	545.4	480.2	3.88	3.04	581	539	546.2	503.5	548	537.6	544.5	548.5	477.3	483	467.1	494.9	462.6	493.2	455.9	487.5	1
TGGT1_221710	High	IsMasterProtein	TGGT1_221710-t26_1-p1	transcript=TGGT1_221710-t26_1 | gene=TGGT1_221710 | organism=Toxoplasma_gondii_GT1 | gene_product=Rab-GAP TBC domain-containing protein [Source:UniProtKB/TrEMBL;Acc:S7VU19] | transcript_product=TBC domain-containing protein | location=TGGT1_chrII:581382-588632(-) | protein_length=1707 | sequence_SO=chromosome | SO=protein_coding_gene | is_pseudo=false	0	14.929	4	6	6	6	1707	181.9	5.76	13.02	6	1.136	0.18	0.00012273	242.5	213.4	3.22	3.87	241.1	233.6	243.9	233.9	255	235.4	246.5	249.3	208.5	207.4	209.9	228.9	203.5	216.9	217.2	220.3	1
TGGT1_225800	High	IsMasterProtein	TGGT1_225800-t26_1-p1	transcript=TGGT1_225800-t26_1 | gene=TGGT1_225800 | organism=Toxoplasma_gondii_GT1 | gene_product=ABC transporter domain-containing protein [Source:UniProtKB/TrEMBL;Acc:S7W5I7] | transcript_product=iron-sulfur assembly ATPase | location=TGGT1_chrX:1940841-1943804(-) | protein_length=518 | sequence_SO=chromosome | SO=protein_coding_gene | is_pseudo=false	0	19.857	18	6	9	6	518	57	5.63	25.52	6	1.136	0.18	0.00851798	190	167.3	4.92	6.7	185.3	196.7	177.5	197.6	200.4	178.3	194.8	182	181.9	164.7	173.2	170	156.7	162.6	154.7	186.2	1
TGGT1_245520	High	IsMasterProtein	TGGT1_245520-t26_1-p1	transcript=TGGT1_245520-t26_1 | gene=TGGT1_245520 | organism=Toxoplasma_gondii_GT1 | gene_product=hypothetical protein | transcript_product=hypothetical protein | location=TGGT1_chrXII:2284484-2285533(+) | protein_length=235 | sequence_SO=chromosome | SO=protein_coding_gene | is_pseudo=false	0.009	2.758	6	2	2	2	235	25.6	9.07	3.97	2	1.136	0.18	0.0105425	230.8	203.2	5.61	5.65	215.1	204	234.2	229.6	229.9	237.8	243.9	231.7	200.3	203.3	203	220.4	183.9	200.7	216.1	214.5	1
TGGT1_247390	High	IsMasterProtein	TGGT1_247390-t26_1-p1	transcript=TGGT1_247390-t26_1 | gene=TGGT1_247390 | organism=Toxoplasma_gondii_GT1 | gene_product=AAA domain-containing protein [Source:UniProtKB/TrEMBL;Acc:S7V105] | transcript_product=ATPase, AAA family protein | location=TGGT1_chrXII:3240940-3256254(+) | protein_length=3915 | sequence_SO=chromosome | SO=protein_coding_gene | is_pseudo=false	0	10.116	1	3	3	3	3915	422.2	5.63	7.37	3	1.136	0.18	0.168264	38.4	33.8	7.49	11.41	41.6	39.5	37.4	35.6	39.4	33	39.7	35.7	33.8	31.4	38.5	33.8	32.5	35.9	41.6	29.3	1
TGGT1_305910	High	IsMasterProtein	TGGT1_305910-t26_1-p1	transcript=TGGT1_305910-t26_1 | gene=TGGT1_305910 | organism=Toxoplasma_gondii_GT1 | gene_product=hypothetical protein | transcript_product=hypothetical protein | location=TGGT1_chrIX:5445343-5447870(-) | protein_length=636 | sequence_SO=chromosome | SO=protein_coding_gene | is_pseudo=false	0	19.103	12	6	8	6	636	68.9	5.39	20.64	6	1.136	0.18	0.0427595	233.1	205.1	7.58	8.61	255.6	241.2	250.8	212.5	236.7	224.5	205.4	229.6	241.7	202.5	204.2	219.5	180.2	196	206.1	208.7	1
TGGT1_310410	Medium	IsMasterProtein	TGGT1_310410-t26_1-p1	transcript=TGGT1_310410-t26_1 | gene=TGGT1_310410 | organism=Toxoplasma_gondii_GT1 | gene_product=WD_REPEATS_REGION domain-containing protein [Source:UniProtKB/TrEMBL;Acc:S7W804] | transcript_product=WD domain, G-beta repeat-containing protein | location=TGGT1_chrXI:1284253-1290504(-) | protein_length=2083 | sequence_SO=chromosome | SO=protein_coding_gene | is_pseudo=false	0.019	1.99	1	1	1	1	2083	222.8	6.84	1.68	1	1.136	0.18	0.0150512	39.3	34.6	6.99	6.76	39.1	35.1	41	36.2	40.3	41.8	39.5	35.1	37.7	32.1	34.7	32.1	34.5	30.9	36.3	34.8	1
TGGT1_241820	High	IsMasterProtein	TGGT1_241820-t26_1-p1	transcript=TGGT1_241820-t26_1 | gene=TGGT1_241820 | organism=Toxoplasma_gondii_GT1 | gene_product=Putative membrane protein [Source:UniProtKB/TrEMBL;Acc:S7URK6] | transcript_product=putative membrane protein | location=TGGT1_chrVI:1664658-1665533(+) | protein_length=291 | sequence_SO=chromosome | SO=protein_coding_gene | is_pseudo=false	0.003	4.35	3	2	4	2	291	30.9	5.92	3.78	2	1.137	0.18	0.163925	21.4	18.8	24.28	12.08	25.7	21.6	33.3	20	28	21.2	16.4	18.2	17	17.6	21.2	16.9	15.9	21.7	20.8	20.1	1
TGGT1_251850	High	IsMasterProtein	TGGT1_251850-t26_1-p1	transcript=TGGT1_251850-t26_1 | gene=TGGT1_251850 | organism=Toxoplasma_gondii_GT1 | gene_product=Serine/threonine-protein phosphatase [Source:UniProtKB/TrEMBL;Acc:S7V0E9] | transcript_product=serine/threonine protein phosphatase | location=TGGT1_chrXII:5533146-5545757(+) | protein_length=1034 | sequence_SO=chromosome | SO=protein_coding_gene | is_pseudo=false	0	67.928	21	19	30	19	1034	117.3	6.19	75.77	19	1.137	0.18	4.27544e-07	2471.5	2174.2	1.89	2.03	2378.7	2477.2	2471.1	2507.6	2471.9	2469.4	2406.4	2512.5	2244.2	2159	2186	2181.9	2132.1	2116.5	2231.7	2166.6	1
TGGT1_262910	High	IsMasterProtein	TGGT1_262910-t26_1-p1	transcript=TGGT1_262910-t26_1 | gene=TGGT1_262910 | organism=Toxoplasma_gondii_GT1 | gene_product=NADH-cytochrome b5 reductase [Source:UniProtKB/TrEMBL;Acc:A0A125YJZ9] | transcript_product=putative NADH-cytochrome b5 reductase 1 | location=TGGT1_chrVIIb:908592-911184(-) | protein_length=339 | sequence_SO=chromosome | SO=protein_coding_gene | is_pseudo=false	0	47.33	34	15	25	15	339	37.5	7.01	57.31	15	1.137	0.18	0.000326728	2377.6	2091.7	3.85	1.22	2455.9	2228.8	2413.9	2248.1	2455.7	2342.4	2413.2	2299	2044	2097.1	2112.3	2084.6	2088.7	2075.2	2130.3	2094.7	1
TGGT1_271190	Low	IsMasterProtein	TGGT1_271190-t26_1-p1	transcript=TGGT1_271190-t26_1 | gene=TGGT1_271190 | organism=Toxoplasma_gondii_GT1 | gene_product=Bin3-type SAM domain-containing protein [Source:UniProtKB/TrEMBL;Acc:A0A125YWV4] | transcript_product=bicoid-interacting protein BIN3 | location=TGGT1_chrVIII:4644411-4646777(+) | protein_length=788 | sequence_SO=chromosome | SO=protein_coding_gene | is_pseudo=false	0.064	1.293	1	1	1	1	788	84.4	7.55	0	1	1.121	0.17	0.714193	22.8	20.4	15.24	10.04	23.1	22.5	18.3	22.9	14.9	22.8	24.9	22.9	22.5	18.3	22.5	23.3	17.9	19.7	19.3	21.1	1
TGGT1_214800	High	IsMasterProtein	TGGT1_214800-t26_1-p1	transcript=TGGT1_214800-t26_1 | gene=TGGT1_214800 | organism=Toxoplasma_gondii_GT1 | gene_product=hypothetical protein | transcript_product=hypothetical protein | location=TGGT1_chrX:6390288-6392567(-) | protein_length=759 | sequence_SO=chromosome | SO=protein_coding_gene | is_pseudo=false	0	13.371	9	5	5	5	759	82.4	5.66	14.32	5	1.122	0.17	0.109305	250.5	223.3	11.81	3.44	213.2	284.6	214.1	270.3	233.3	271.2	223.8	269	227.5	222.3	224.3	233.2	207.4	224.9	221.7	216.6	1
TGGT1_226390	High	IsMasterProtein	TGGT1_226390-t26_1-p1	transcript=TGGT1_226390-t26_1 | gene=TGGT1_226390 | organism=Toxoplasma_gondii_GT1 | gene_product=Hydrolase_4 domain-containing protein [Source:UniProtKB/TrEMBL;Acc:S7UXI2] | transcript_product=hypothetical protein | location=TGGT1_chrX:1573502-1576501(+) | protein_length=999 | sequence_SO=chromosome | SO=protein_coding_gene | is_pseudo=false	0.001	5.762	3	2	2	2	999	107.8	7.49	6.1	2	1.122	0.17	0.0182567	107	95.4	5.98	5.89	114.2	106.3	102.7	107.7	117.6	106	111.9	97.5	107.3	94.4	93.9	100.7	90.9	94.3	104.5	96.4	1
TGGT1_243530	High	IsMasterProtein	TGGT1_243530-t26_1-p1	transcript=TGGT1_243530-t26_1 | gene=TGGT1_243530 | organism=Toxoplasma_gondii_GT1 | gene_product=PPR_long domain-containing protein [Source:UniProtKB/TrEMBL;Acc:S7UFS2] | transcript_product=pentatricopeptide repeat domain-containing protein | location=TGGT1_chrVI:2612935-2618963(+) | protein_length=1419 | sequence_SO=chromosome | SO=protein_coding_gene | is_pseudo=false	0	12.408	3	5	5	4	1419	157.1	9.77	9.82	5	1.122	0.17	0.0036706	213.8	190.5	6.52	5.52	234.4	205	210.8	223.9	216.7	238.5	210.4	197.9	196.1	182.7	168.1	191.2	200.6	189.8	189.8	199	1
TGGT1_246340	High	IsMasterProtein	TGGT1_246340-t26_1-p1	transcript=TGGT1_246340-t26_1 | gene=TGGT1_246340 | organism=Toxoplasma_gondii_GT1 | gene_product=J domain-containing protein [Source:UniProtKB/TrEMBL;Acc:S7WGW8] | transcript_product=DnaJ domain-containing protein | location=TGGT1_chrXII:2699792-2706554(+) | protein_length=877 | sequence_SO=chromosome | SO=protein_coding_gene | is_pseudo=false	0	69.616	19	19	26	19	877	95.3	8.63	71.27	19	1.122	0.17	4.07976e-06	1635.2	1456.8	2.14	2.35	1647.4	1608.8	1643.4	1614.3	1682	1654.5	1627.1	1566.2	1456.6	1457	1483.6	1384.8	1488	1484.7	1433.4	1455.1	1	Methylthio [C797]
TGGT1_263330	High	IsMasterProtein	TGGT1_263330-t26_1-p1	transcript=TGGT1_263330-t26_1 | gene=TGGT1_263330 | organism=Toxoplasma_gondii_GT1 | gene_product=DUF1681 domain-containing protein [Source:UniProtKB/TrEMBL;Acc:S7UXC0] | transcript_product=Adaptin ear-binding coat-associated protein 2 (NECAP-2) isoform 2 family protein | location=TGGT1_chrVIIb:597171-603066(-) | protein_length=294 | sequence_SO=chromosome | SO=protein_coding_gene | is_pseudo=fal…	0	9.222	13	3	3	3	294	33	5.4	9.59	3	1.122	0.17	0.0343522	227	202.4	7.77	5.96	190.3	224.5	239.3	214.9	237.8	243.8	229.6	215.6	198.3	216.5	189.8	206.6	182.7	209.3	214.5	196.1	1
TGGT1_264200	High	IsMasterProtein	TGGT1_264200-t26_1-p1	transcript=TGGT1_264200-t26_1 | gene=TGGT1_264200 | organism=Toxoplasma_gondii_GT1 | gene_product=Uroporphyrinogen-III synthase [Source:UniProtKB/TrEMBL;Acc:S7WDF8] | transcript_product=hypothetical protein | location=TGGT1_chrVIIb:56953-61319(-) | protein_length=1275 | sequence_SO=chromosome | SO=protein_coding_gene | is_pseudo=false	0	15.156	6	6	6	6	1275	137.7	7.58	9.9	6	1.122	0.17	0.000491106	318.1	283.5	3.84	4.49	315.5	317.6	327.2	314.7	318.5	329.2	347.3	306.9	291.4	285	282	278.6	272.5	286.6	275	313.4	1
TGGT1_277010	Medium	IsMasterProtein	TGGT1_277010-t26_1-p1	transcript=TGGT1_277010-t26_1 | gene=TGGT1_277010 | organism=Toxoplasma_gondii_GT1 | gene_product=SufE domain-containing protein [Source:UniProtKB/TrEMBL;Acc:S7UZD2] | transcript_product=Fe-S metabolism associated domain-containing protein | location=TGGT1_chrXII:6695722-6699018(+) | protein_length=340 | sequence_SO=chromosome | SO=protein_coding_gene | is_pseudo=false	0.023	1.845	3	1	1	1	340	36.3	10.2	2.15	1	1.122	0.17	0.221151	18.5	16.5	14.39	15.32	17.7	18.2	18.9	14.7	16.7	23.4	20.3	20.9	18	14.3	15.2	13.8	18.7	14.3	18.9	20.4	1
TGGT1_280370	High	IsMasterProtein	TGGT1_280370-t26_1-p1	transcript=TGGT1_280370-t26_1 | gene=TGGT1_280370 | organism=Toxoplasma_gondii_GT1 | gene_product=hypothetical protein | transcript_product=hypothetical protein | location=TGGT1_chrVIIa:472199-474884(+) | protein_length=761 | sequence_SO=chromosome | SO=protein_coding_gene | is_pseudo=false	0	32.39	18	13	20	12	761	81.8	7.61	50.74	13	1.122	0.17	0.000976544	1886.9	1682.3	4.71	3.59	2025.7	1851.3	2002.8	1851.6	1975.1	1908.4	1865.8	1763.5	1673.6	1657.8	1723.1	1619.1	1780.5	1648.3	1785.4	1691	1
TGGT1_316520	High	IsMasterProtein	TGGT1_316520-t26_1-p1	transcript=TGGT1_316520-t26_1 | gene=TGGT1_316520 | organism=Toxoplasma_gondii_GT1 | gene_product=Aamy domain-containing protein [Source:UniProtKB/TrEMBL;Acc:S7UM15] | transcript_product=1,4-alpha-glucan-branching enzyme | location=TGGT1_chrXI:5308256-5318090(-) | protein_length=972 | sequence_SO=chromosome | SO=protein_coding_gene | is_pseudo=false	0	21.248	9	8	10	8	972	109.7	6.24	21.52	8	1.122	0.17	1.69705e-05	645.2	574.8	3.09	2.89	638.6	672.1	648.8	633.2	663.9	690.8	641.5	638.7	551.2	579.1	571.1	588.9	557.1	574.6	603.7	575.1	1
TGGT1_200370	High	IsMasterProtein	TGGT1_200370-t26_1-p1	transcript=TGGT1_200370-t26_1 | gene=TGGT1_200370 | organism=Toxoplasma_gondii_GT1 | gene_product=Protein farnesyltransferase subunit beta [Source:UniProtKB/TrEMBL;Acc:S7V4Z7] | transcript_product=prenyltransferase and squalene oxidase repeat-containing protein | location=TGGT1_chrVIII:6802421-6807393(-) | protein_length=638 | sequence_SO=chromosome | SO=protein_coding_gene | is_pseudo=false	0	8.066	5	3	3	3	638	69.9	6.13	4.67	3	1.123	0.17	0.00477814	109	97	3.39	6.8	108	109.3	116	113.3	115.2	108.7	107.5	106.2	99.7	94.4	88.7	93.8	104.6	100.6	91.9	108.1	1
TGGT1_222900	High	IsMasterProtein	TGGT1_222900-t26_1-p1	transcript=TGGT1_222900-t26_1 | gene=TGGT1_222900 | organism=Toxoplasma_gondii_GT1 | gene_product=Phosphoserine phosphatase [Source:UniProtKB/TrEMBL;Acc:S7UL15] | transcript_product=phosphoserine phosphatase | location=TGGT1_chrII:1266680-1283473(-) | protein_length=1766 | sequence_SO=chromosome | SO=protein_coding_gene | is_pseudo=false	0	55.817	12	18	24	18	1766	191.3	6.61	58.14	18	1.123	0.17	1.97964e-07	2052.3	1827.8	0.91	1.65	2044.5	2088.5	2062.3	2028.7	2053.9	2065.6	2036.3	2050.7	1771.1	1843.2	1814.7	1791.3	1856.8	1847.1	1841.1	1813.5	1	Methylthio [C1129]
TGGT1_225360	High	IsMasterProtein	TGGT1_225360-t26_1-p1	transcript=TGGT1_225360-t26_1 | gene=TGGT1_225360 | organism=Toxoplasma_gondii_GT1 | gene_product=hypothetical protein | transcript_product=hypothetical protein | location=TGGT1_chrX:2193035-2196689(-) | protein_length=756 | sequence_SO=chromosome | SO=protein_coding_gene | is_pseudo=false	0	14.501	10	5	5	5	756	82.2	6.3	7.09	5	1.123	0.17	0.00202057	160.6	142.9	5.7	3.38	169.5	161.6	159.1	150	151.5	159.5	174.1	173.3	145.7	139.4	145	148.4	139.6	138.5	140.9	151.9	1
TGGT1_256090	High	IsMasterProtein	TGGT1_256090-t26_1-p1	transcript=TGGT1_256090-t26_1 | gene=TGGT1_256090 | organism=Toxoplasma_gondii_GT1 | gene_product=GP-PDE domain-containing protein [Source:UniProtKB/TrEMBL;Acc:A0A125YXI4] | transcript_product=glycerophosphodiester phosphodiesterase family protein | location=TGGT1_chrVIIb:4433438-4434541(+) | protein_length=367 | sequence_SO=chromosome | SO=protein_coding_gene | is_pseudo=false	0	12.549	8	3	7	3	367	41.6	6.28	22.27	3	1.123	0.17	0.00152965	454.1	404.4	4.53	3.95	456.9	446.5	456.9	457.3	497.8	436.8	451.3	428.2	429.2	396.8	388	410.1	423.7	425.4	398.6	393.9	1
TGGT1_261000	High	IsMasterProtein	TGGT1_261000-t26_1-p1	transcript=TGGT1_261000-t26_1 | gene=TGGT1_261000 | organism=Toxoplasma_gondii_GT1 | gene_product=DNA_MISMATCH_REPAIR_2 domain-containing protein [Source:UniProtKB/TrEMBL;Acc:S7UY47] | transcript_product=MutS domain V domain-containing protein | location=TGGT1_chrVIIb:1954089-1962135(+) | protein_length=936 | sequence_SO=chromosome | SO=protein_coding_gene | is_pseudo=false	0	52.089	15	15	21	15	936	102.2	6.83	43.32	15	1.123	0.17	0.00683449	1206.8	1074.6	5.3	4.85	1232.5	1082.4	1289.5	1160.1	1230.6	1218.1	1195.7	1150	1156.6	1056.7	1120.5	1007.9	1087.5	1018.4	1121.5	1061.9	1
TGGT1_203180	High	IsMasterProtein	TGGT1_203180-t26_1-p1	transcript=TGGT1_203180-t26_1 | gene=TGGT1_203180 | organism=Toxoplasma_gondii_GT1 | gene_product=Leucine rich repeat-containing protein [Source:UniProtKB/TrEMBL;Acc:S7UUV4] | transcript_product=leucine rich repeat-containing protein | location=TGGT1_chrVIIa:2588798-2607358(-) | protein_length=4481 | sequence_SO=chromosome | SO=protein_coding_gene | is_pseudo=false	0	20.714	2	8	8	8	4481	476.9	7.52	15.58	8	1.124	0.17	0.12587	396.5	352.7	19.51	6.53	341.3	511.6	341.9	486	347.6	452.2	323.8	492	357.5	370.2	325.7	363	310.1	366.5	325.2	347.9	1
TGGT1_207720	High	IsMasterProtein	TGGT1_207720-t26_1-p1	transcript=TGGT1_207720-t26_1 | gene=TGGT1_207720 | organism=Toxoplasma_gondii_GT1 | gene_product=hypothetical protein | transcript_product=hypothetical protein | location=TGGT1_chrIb:247992-259807(+) | protein_length=1628 | sequence_SO=chromosome | SO=protein_coding_gene | is_pseudo=false	0	10.911	3	6	7	6	1628	177	7.56	12.95	6	1.124	0.17	0.000413265	651.6	579.6	3.09	3.71	687.9	620.3	657.2	651	661.4	652.2	644.5	632.6	574.3	568.5	620.5	582.9	576.3	598.3	616.1	562.7	1
TGGT1_220110	Medium	IsMasterProtein	TGGT1_220110-t26_1-p1	transcript=TGGT1_220110-t26_1 | gene=TGGT1_220110 | organism=Toxoplasma_gondii_GT1 | gene_product=hypothetical protein | transcript_product=hypothetical protein | location=TGGT1_chrV:33723-43205(-) | protein_length=2520 | sequence_SO=chromosome | SO=protein_coding_gene | is_pseudo=false	0.039	1.528	0	1	1	1	2520	269.9	6.65	1.61	1	1.124	0.17	0.0134193	64.8	57.6	9.63	7.23	60.4	72.3	67.1	60	62.5	77.7	62.3	70.4	55.8	59.3	57.7	61.9	50.8	57.5	52	62	1
TGGT1_240910	High	IsMasterProtein	TGGT1_240910-t26_1-p1	transcript=TGGT1_240910-t26_1 | gene=TGGT1_240910 | organism=Toxoplasma_gondii_GT1 | gene_product=C2 domain-containing protein [Source:UniProtKB/TrEMBL;Acc:S7USF1] | transcript_product=hypothetical protein | location=TGGT1_chrVI:1522402-1546111(-) | protein_length=1910 | sequence_SO=chromosome | SO=protein_coding_gene | is_pseudo=false	0.003	4.878	1	2	2	2	1910	214.8	6.44	4.31	2	1.124	0.17	0.00474691	136.5	121.4	6.6	5.78	148.2	148	135.8	136.2	151.1	136.7	125.5	130.6	129.6	127.4	119.1	130.3	117.4	112.1	114.2	123.7	1
TGGT1_262390	High	IsMasterProtein	TGGT1_262390-t26_1-p1	transcript=TGGT1_262390-t26_1 | gene=TGGT1_262390 | organism=Toxoplasma_gondii_GT1 | gene_product=TLDc domain-containing protein [Source:UniProtKB/TrEMBL;Acc:S7UYB4] | transcript_product=TLD protein | location=TGGT1_chrVIIb:1280695-1289391(+) | protein_length=1392 | sequence_SO=chromosome | SO=protein_coding_gene | is_pseudo=false	0	25.445	8	8	10	8	1392	148	6.24	23.51	8	1.124	0.17	6.06989e-05	564.6	502.5	2.36	3.34	554.7	584.1	576.1	586.1	550.6	568.2	561.1	559.6	497	501.2	503.7	517.4	493.6	507.1	493.1	544.2	1
TGGT1_273490	High	IsMasterProtein	TGGT1_273490-t26_1-p1	transcript=TGGT1_273490-t26_1 | gene=TGGT1_273490 | organism=Toxoplasma_gondii_GT1 | gene_product=Gln-synt_C domain-containing protein [Source:UniProtKB/TrEMBL;Acc:S7WJT1] | transcript_product=putative glutamine synthetase, type I | location=TGGT1_chrVIII:3443164-3448518(+) | protein_length=479 | sequence_SO=chromosome | SO=protein_coding_gene | is_pseudo=false	0	23.737	9	4	13	4	479	53.4	6.55	35.7	4	1.124	0.17	1.67605e-06	1430.2	1272.1	2.04	1.87	1437.5	1362.9	1449.9	1422.9	1451.9	1418.3	1408.4	1440.9	1281.6	1263.8	1270.2	1266.5	1321.5	1273.9	1304.9	1246.9	1
TGGT1_206300	Low	IsMasterProtein	TGGT1_206300-t26_1-p1	transcript=TGGT1_206300-t26_1 | gene=TGGT1_206300 | organism=Toxoplasma_gondii_GT1 | gene_product=SAM_MT_RSMB_NOP domain-containing protein [Source:UniProtKB/TrEMBL;Acc:S7UUP8] | transcript_product=hypothetical protein | location=TGGT1_chrVIIa:1051370-1053847(-) | protein_length=825 | sequence_SO=chromosome | SO=protein_coding_gene | is_pseudo=false	0.051	1.403	1	1	1	1	825	89.9	7.65	0	1	1.125	0.17	0.76319	22.2	19.7	18.64	21.9	29.2	23.7	20.7	17.2	24.7	17.9	19.1	24.9	17.1	20.8	19.9	25.1	19.5	18.7	31.2	18.1	1
TGGT1_210760	Medium	IsMasterProtein	TGGT1_210760-t26_1-p1	transcript=TGGT1_210760-t26_1 | gene=TGGT1_210760 | organism=Toxoplasma_gondii_GT1 | gene_product=Putative glutamine amidotransferase [Source:UniProtKB/TrEMBL;Acc:A0A125YN80] | transcript_product=putative glutamine amidotransferase | location=TGGT1_chrIV:2019383-2021410(+) | protein_length=518 | sequence_SO=chromosome | SO=protein_coding_gene | is_pseudo=false	0.048	1.429	2	1	1	1	518	56.7	5.49	1.67	1	1.125	0.17	0.0951013	16.4	14.6	14.91	11.46	20.8	18.9	15.2	18.8	14.6	15.6	17.2	13.5	13.7	16.3	11.6	14.1	12.8	15.3	15.1	16.2	1
TGGT1_217850	High	IsMasterProtein	TGGT1_217850-t26_1-p1	transcript=TGGT1_217850-t26_1 | gene=TGGT1_217850 | organism=Toxoplasma_gondii_GT1 | gene_product=Sucrose-6F-phosphate phosphohydrolase [Source:UniProtKB/TrEMBL;Acc:S7WA27] | transcript_product=Sucrose-6F-phosphate phosphohydrolase | location=TGGT1_chrXII:2106606-2113540(-) | protein_length=542 | sequence_SO=chromosome | SO=protein_coding_gene | is_pseudo=false	0	13.886	8	6	8	6	542	59.6	6.19	16.23	6	1.125	0.17	0.00153556	363.9	323.5	4.37	4	392.3	379.4	373.9	361	341.5	366.8	356.9	354	317.3	319.4	316.3	342.7	323.1	323.8	343.2	348.3	1
TGGT1_242460	High	IsMasterProtein	TGGT1_242460-t26_1-p1	transcript=TGGT1_242460-t26_1 | gene=TGGT1_242460 | organism=Toxoplasma_gondii_GT1 | gene_product=Mitochondrial carrier superfamily protein [Source:UniProtKB/TrEMBL;Acc:S7W0L2] | transcript_product=mitochondrial carrier superfamily protein | location=TGGT1_chrVI:1971949-1977652(-) | protein_length=486 | sequence_SO=chromosome | SO=protein_coding_gene | is_pseudo=false	0	10.662	9	4	5	4	486	51.5	9.07	11.86	4	1.125	0.17	6.46064e-05	383.3	340.9	2.78	3.05	385.7	381.4	362.3	381.6	382.8	401.5	383.9	386.3	341.8	355.5	333.1	361.8	339.9	337.6	332.9	347.9	1
TGGT1_244870B	High	IsMasterProtein	TGGT1_244870B-t26_1-p1	transcript=TGGT1_244870B-t26_1 | gene=TGGT1_244870B | organism=Toxoplasma_gondii_GT1 | gene_product=PKS_ER domain-containing protein [Source:UniProtKB/TrEMBL;Acc:S7W7H5] | transcript_product=putative quinone oxidoreductase | location=TGGT1_chrVI:3463792-3468012(+) | protein_length=305 | sequence_SO=chromosome | SO=protein_coding_gene | is_pseudo=false	0.005	3.394	3	1	1	1	305	32.6	7.84	2.36	1	1.125	0.17	0.14892	81.9	72.8	10.08	4.25	68.2	81.6	76	83.4	86.4	91.6	69.8	82.3	72.3	69.7	78.2	76.9	71.3	73.4	75.7	70.6	1
TGGT1_255330	Medium	IsMasterProtein	TGGT1_255330-t26_1-p1	transcript=TGGT1_255330-t26_1 | gene=TGGT1_255330 | organism=Toxoplasma_gondii_GT1 | gene_product=hypothetical protein | transcript_product=hypothetical protein | location=TGGT1_chrVIIb:4806660-4808322(+) | protein_length=327 | sequence_SO=chromosome | SO=protein_coding_gene | is_pseudo=false	0.022	1.917	2	1	1	1	327	34.9	6.95	1.98	1	1.125	0.17	0.0088776	58.5	52	5.34	7.62	58.8	57.4	58.2	61.5	62.5	59.6	57.6	52.2	56.6	43.3	51.7	48.8	53.8	50.9	52.6	52.3	1
TGGT1_266470	High	IsMasterProtein	TGGT1_266470-t26_1-p1	transcript=TGGT1_266470-t26_1 | gene=TGGT1_266470 | organism=Toxoplasma_gondii_GT1 | gene_product=hypothetical protein | transcript_product=hypothetical protein | location=TGGT1_chrIX:940675-941958(+) | protein_length=120 | sequence_SO=chromosome | SO=protein_coding_gene | is_pseudo=false	0	18.209	23	5	8	5	120	14.1	9.19	19.44	5	1.125	0.17	1.36046e-05	830.2	737.9	3.15	2.32	821.9	807	838.6	806.8	868.9	843.2	873.6	815.7	728.6	748.6	731.9	713.7	743.9	707.9	754.1	747.8	1
TGGT1_267580	High	IsMasterProtein	TGGT1_267580-t26_1-p1	transcript=TGGT1_267580-t26_1 | gene=TGGT1_267580 | organism=Toxoplasma_gondii_GT1 | gene_product=Cyclin2 related protein [Source:UniProtKB/TrEMBL;Acc:S7UGP7] | transcript_product=cyclin2 related protein | location=TGGT1_chrIX:384583-388312(+) | protein_length=912 | sequence_SO=chromosome | SO=protein_coding_gene | is_pseudo=false	0	41.585	16	12	16	12	912	94.8	5.43	41.64	12	1.125	0.17	1.72909e-07	875.6	778.6	1.61	1.72	881.6	875.2	876.1	865.3	886.8	863	904.9	863.9	780.7	776	776.4	758.8	796.1	775.5	792.5	799.6	1
TGGT1_270800	High	IsMasterProtein	TGGT1_270800-t26_1-p1	transcript=TGGT1_270800-t26_1 | gene=TGGT1_270800 | organism=Toxoplasma_gondii_GT1 | gene_product=GAF domain-containing protein [Source:UniProtKB/TrEMBL;Acc:S7V534] | transcript_product=GAF domain-containing protein | location=TGGT1_chrVIII:4984957-4987035(+) | protein_length=692 | sequence_SO=chromosome | SO=protein_coding_gene | is_pseudo=false	0	13.705	6	3	4	3	692	74.1	7.24	13.01	3	1.125	0.17	0.0702392	82.8	73.6	6.37	10.74	84.2	89.3	80.6	73.6	86.6	81.4	89.3	80.4	67.6	78.7	71.6	75.7	68.7	91.4	67.5	77.9	1
TGGT1_287170	High	IsMasterProtein	TGGT1_287170-t26_1-p1	transcript=TGGT1_287170-t26_1 | gene=TGGT1_287170 | organism=Toxoplasma_gondii_GT1 | gene_product=hypothetical protein | transcript_product=hypothetical protein | location=TGGT1_chrV:1407962-1410454(-) | protein_length=363 | sequence_SO=chromosome | SO=protein_coding_gene | is_pseudo=false	0	16.875	15	5	7	5	363	38.5	5.22	17.19	5	1.125	0.17	0.0304379	417.8	371.4	5.78	5.41	420.9	405.9	430.5	397.2	424.7	360	432.2	414.7	366.2	385.2	354.3	376.6	365.2	388.7	361.2	418.1	1
TGGT1_210440	High	IsMasterProtein	TGGT1_210440-t26_1-p1	transcript=TGGT1_210440-t26_1 | gene=TGGT1_210440 | organism=Toxoplasma_gondii_GT1 | gene_product=Polynucleotide adenylyltransferase [Source:UniProtKB/TrEMBL;Acc:S7W3U9] | transcript_product=polynucleotide adenylyltransferase | location=TGGT1_chrIX:4581255-4587074(+) | protein_length=835 | sequence_SO=chromosome | SO=protein_coding_gene | is_pseudo=false	0.001	5.534	3	2	2	2	835	91.9	6.49	4.48	2	1.126	0.17	0.128649	55.1	48.9	12.75	8.8	50.6	54.9	67.1	60.2	52.3	55.4	57.4	43.2	51.4	51.4	50.3	47.6	46.4	42.3	45.8	56.3	1
TGGT1_223485	High	IsMasterProtein	TGGT1_223485-t26_1-p1	transcript=TGGT1_223485-t26_1 | gene=TGGT1_223485 | organism=Toxoplasma_gondii_GT1 | gene_product=hypothetical protein | transcript_product=hypothetical protein | location=TGGT1_chrX:3690054-3691863(+) | protein_length=93 | sequence_SO=chromosome | SO=protein_coding_gene | is_pseudo=false	0	13.489	34	4	4	4	93	10.3	9.58	13.41	4	1.126	0.17	2.5567e-06	752.6	668.2	2.36	1.43	742.5	737	771	756	782.7	749.2	733.7	770.3	678.7	669.4	664.6	667.1	681.2	654.4	682	666.1	1
TGGT1_224620	High	IsMasterProtein	TGGT1_224620-t26_1-p1	transcript=TGGT1_224620-t26_1 | gene=TGGT1_224620 | organism=Toxoplasma_gondii_GT1 | gene_product=hypothetical protein | transcript_product=hypothetical protein | location=TGGT1_chrX:2833307-2838212(-) | protein_length=288 | sequence_SO=chromosome | SO=protein_coding_gene | is_pseudo=false	0.001	6.668	10	3	3	3	288	32.6	6.62	6.34	3	1.126	0.17	0.0152371	474.5	421.3	8	5.57	503.8	454.7	506.2	449.6	495.2	440.7	536	429.5	433.1	398	409.1	431	450.2	388.3	451.7	411.8	1
TGGT1_224830	High	IsMasterProtein	TGGT1_224830-t26_1-p1	transcript=TGGT1_224830-t26_1 | gene=TGGT1_224830 | organism=Toxoplasma_gondii_GT1 | gene_product=hypothetical protein | transcript_product=hypothetical protein | location=TGGT1_chrX:2712917-2718606(-) | protein_length=1114 | sequence_SO=chromosome | SO=protein_coding_gene | is_pseudo=false	0.003	4.431	2	2	2	2	1114	121	8.22	2.31	2	1.126	0.17	0.0399717	150.2	133.4	8.32	7.33	151.1	147	155.7	140.8	176	151.3	149.3	132.8	148.4	146	133.4	128.9	122.9	141.8	133.5	122.9	1
TGGT1_234440	High	IsMasterProtein	TGGT1_234440-t26_1-p1	transcript=TGGT1_234440-t26_1 | gene=TGGT1_234440 | organism=Toxoplasma_gondii_GT1 | gene_product=Aminotran_1_2 domain-containing protein [Source:UniProtKB/TrEMBL;Acc:A0A125YFJ6] | transcript_product=putative aminotransferase | location=TGGT1_chrX:4285968-4290826(+) | protein_length=411 | sequence_SO=chromosome | SO=protein_coding_gene | is_pseudo=false	0	11.671	13	5	5	5	411	45.6	6.28	11.54	5	1.126	0.17	6.39823e-05	335.9	298.3	2.86	3.5	337.5	334.1	340.4	347.5	350.4	334.3	324.5	323.7	308.2	295.4	291.1	300.1	304.7	308.4	296.5	277	1
TGGT1_263290	High	IsMasterProtein	TGGT1_263290-t26_1-p1	transcript=TGGT1_263290-t26_1 | gene=TGGT1_263290 | organism=Toxoplasma_gondii_GT1 | gene_product=RHOMBOID-like protein [Source:UniProtKB/TrEMBL;Acc:S7UXN0] | transcript_product=rhomboid protease ROM2 | location=TGGT1_chrVIIb:625248-629940(-) | protein_length=283 | sequence_SO=chromosome | SO=protein_coding_gene | is_pseudo=false	0.004	3.521	4	1	1	1	283	30.6	7.05	2.51	1	1.126	0.17	0.241795	32.4	28.8	16.67	14.17	30.9	41.2	33.5	33.9	31.4	35.4	22.1	30.3	29	28.6	26.8	29.9	31.5	34.5	24.2	21.9	1
TGGT1_273030	High	IsMasterProtein	TGGT1_273030-t26_1-p1	transcript=TGGT1_273030-t26_1 | gene=TGGT1_273030 | organism=Toxoplasma_gondii_GT1 | gene_product=Phosphoglycerate mutase family protein [Source:UniProtKB/TrEMBL;Acc:A0A125YY20] | transcript_product=phosphoglycerate mutase family protein | location=TGGT1_chrVIII:3695374-3697417(-) | protein_length=307 | sequence_SO=chromosome | SO=protein_coding_gene | is_pseudo=false	0	20.469	24	7	10	7	307	34.2	6.95	23.46	7	1.126	0.17	0.00102982	658	584.3	5.68	3.34	699.7	670.3	695.4	624.4	718.7	645.9	635.4	619.8	588.1	591.1	604.3	570.3	580.6	550.4	596.6	555.5	1
TGGT1_278370	High	IsMasterProtein	TGGT1_278370-t26_1-p1	transcript=TGGT1_278370-t26_1 | gene=TGGT1_278370 | organism=Toxoplasma_gondii_GT1 | gene_product=Toxoplasma gondii family A protein [Source:UniProtKB/TrEMBL;Acc:S7V026] | transcript_product=Toxoplasma gondii family A protein | location=TGGT1_chrXII:6046736-6047821(-) | protein_length=361 | sequence_SO=chromosome | SO=protein_coding_gene | is_pseudo=false	0.001	6.632	7	2	2	1	361	37.7	4.54	7.1	2	1.126	0.17	0.531515	38.7	34.3	15.11	15.43	39.7	44.6	37.8	39.3	26.7	34.8	44.9	38	34.9	33.8	36.6	46.8	29.6	39.4	30.7	33.1	1
TGGT1_288850	Low	IsMasterProtein	TGGT1_288850-t26_1-p1	transcript=TGGT1_288850-t26_1 | gene=TGGT1_288850 | organism=Toxoplasma_gondii_GT1 | gene_product=hypothetical protein | transcript_product=hypothetical protein | location=TGGT1_chrIX:2580092-2582127(-) | protein_length=99 | sequence_SO=chromosome | SO=protein_coding_gene | is_pseudo=false	0.055	1.367	8	1	1	1	99	10.5	4.55	0	1	1.126	0.17	0.264806	19.1	17	17.72	24.2	20	18.9	15.8	15.8	19.3	18.5	26.3	22.6	17.8	12	14.6	25.5	16.2	18.2	13.6	18.3	1
TGGT1_308830	High	IsMasterProtein	TGGT1_308830-t26_1-p1	transcript=TGGT1_308830-t26_1 | gene=TGGT1_308830 | organism=Toxoplasma_gondii_GT1 | gene_product=Dual specificity protein phosphatase [Source:UniProtKB/TrEMBL;Acc:A0A125YIP2] | transcript_product=dual specificity protein phosphatase | location=TGGT1_chrXI:253759-256178(+) | protein_length=172 | sequence_SO=chromosome | SO=protein_coding_gene | is_pseudo=false	0.006	3.024	8	1	1	1	172	19.7	5.59	2.71	1	1.126	0.17	0.696685	9.2	8.2	35.32	30.02	10	8	10	5.7	2.6	11.8	8.5	10.3	7	6.6	10.3	11.7	6.2	7.7	13.8	8.7	1
TGGT1_310270	High	IsMasterProtein	TGGT1_310270-t26_1-p1	transcript=TGGT1_310270-t26_1 | gene=TGGT1_310270 | organism=Toxoplasma_gondii_GT1 | gene_product=hypothetical protein | transcript_product=hypothetical protein | location=TGGT1_chrXI:1165062-1173635(+) | protein_length=1357 | sequence_SO=chromosome | SO=protein_coding_gene | is_pseudo=false	0.001	7.344	2	3	3	3	1357	146	6.21	5.73	3	1.126	0.17	0.0871749	105.2	93.3	5.1	9.55	105.3	112.6	113.8	99	99.8	102.7	105	106.4	101.5	101.9	92.5	93.9	92.8	90.9	85.7	115.5	1
TGGT1_222040	High	IsMasterProtein	TGGT1_222040-t26_1-p1	transcript=TGGT1_222040-t26_1 | gene=TGGT1_222040 | organism=Toxoplasma_gondii_GT1 | gene_product=Ran-interacting Mog1 protein [Source:UniProtKB/TrEMBL;Acc:S7VTX0] | transcript_product=Ran-interacting Mog1 protein | location=TGGT1_chrII:761732-763781(+) | protein_length=183 | sequence_SO=chromosome | SO=protein_coding_gene | is_pseudo=false	0.001	6.606	6	1	4	1	183	20.5	4.64	6.72	1	1.127	0.17	0.101931	111	98.5	10.43	5.82	118.4	110.7	117.3	90.9	101.6	103.7	128.1	111.3	93.9	98.6	100	96.2	103.4	95.1	112.1	98.4	1
TGGT1_250850	High	IsMasterProtein	TGGT1_250850-t26_1-p1	transcript=TGGT1_250850-t26_1 | gene=TGGT1_250850 | organism=Toxoplasma_gondii_GT1 | gene_product=Protein kinase domain-containing protein [Source:UniProtKB/TrEMBL;Acc:S7W8T2] | transcript_product=putative CMGC kinase | location=TGGT1_chrXII:5203873-5211981(-) | protein_length=2682 | sequence_SO=chromosome | SO=protein_coding_gene | is_pseudo=false	0	9.331	2	4	5	4	2682	286.3	8.48	7.59	4	1.127	0.17	0.00287444	168.3	149.3	6.62	5.75	190.8	166.3	158.6	188.5	174.4	168.9	167.6	165.4	149	149.6	139.8	139	155.6	162.4	158.9	144.4	1
TGGT1_264050	High	IsMasterProtein	TGGT1_264050-t26_1-p1	transcript=TGGT1_264050-t26_1 | gene=TGGT1_264050 | organism=Toxoplasma_gondii_GT1 | gene_product=UBIQUITIN_CONJUGAT_2 domain-containing protein [Source:UniProtKB/TrEMBL;Acc:A0A125YSJ6] | transcript_product=ubiquitin-conjugating enzyme subfamily protein | location=TGGT1_chrVIIb:189077-192724(+) | protein_length=302 | sequence_SO=chromosome | SO=protein_coding_gene | is_pseudo=false	0	19.742	24	6	8	6	302	34.4	5.27	21.63	6	1.127	0.17	0.0270454	407.8	361.8	7.17	8.9	418	396.8	460.5	397.6	431.6	397.9	460.5	382.9	400.8	341.2	367.6	347.6	432.4	336.3	379.7	356.2	1
TGGT1_265390	Medium	IsMasterProtein	TGGT1_265390-t26_1-p1	transcript=TGGT1_265390-t26_1 | gene=TGGT1_265390 | organism=Toxoplasma_gondii_GT1 | gene_product=CTLH domain-containing protein [Source:UniProtKB/TrEMBL;Acc:S7VQF5] | transcript_product=hypothetical protein | location=TGGT1_chrIX:1402136-1409201(+) | protein_length=533 | sequence_SO=chromosome | SO=protein_coding_gene | is_pseudo=false	0.01	2.716	2	1	1	1	533	58.8	7.34	1.88	1	1.127	0.17	0.13691	33.7	29.9	15.08	11.68	26.7	29.8	41.8	33.7	33.7	40.7	35.9	31.7	25	34.8	25.9	29.8	27.5	30	31.6	33.4	1
TGGT1_272390	High	IsMasterProtein	TGGT1_272390-t26_1-p1	transcript=TGGT1_272390-t26_1 | gene=TGGT1_272390 | organism=Toxoplasma_gondii_GT1 | gene_product=hypothetical protein | transcript_product=hypothetical protein | location=TGGT1_chrVIII:4002798-4008662(-) | protein_length=1258 | sequence_SO=chromosome | SO=protein_coding_gene | is_pseudo=false	0	11.131	3	4	4	4	1258	132.2	9.57	10.7	4	1.127	0.17	0.053092	121.1	107.4	6.24	9.15	118.8	125.7	117.8	133.4	115.5	118.5	123.4	136.6	107.2	123.7	124.3	97.6	103.6	107.6	106.8	121.9	1
TGGT1_302000C	Low	IsMasterProtein	TGGT1_302000C-t26_1-p1	transcript=TGGT1_302000C-t26_1 | gene=TGGT1_302000C | organism=Toxoplasma_gondii_GT1 | gene_product=AAA domain-containing protein [Source:UniProtKB/TrEMBL;Acc:S7UG64] | transcript_product=putative chaperone clp | location=AAQM03000557:1-1689(-) | protein_length=563 | sequence_SO=apicoplast_chromosome | SO=protein_coding_gene | is_pseudo=false	0.056	1.36	1	1	1	1	563	65.8	9.72	2.36	1	1.127	0.17	9.87313e-05	331.4	294.1	2.55	3.68	348.2	329.5	346.3	325.9	327.6	328.9	335.9	333.2	317	305.4	296.2	304.4	292.1	287.1	284.5	291.3	1
TGGT1_312250	Medium	IsMasterProtein	TGGT1_312250-t26_1-p1	transcript=TGGT1_312250-t26_1 | gene=TGGT1_312250 | organism=Toxoplasma_gondii_GT1 | gene_product=DNA-directed RNA polymerase subunit [Source:UniProtKB/TrEMBL;Acc:A0A125YJN2] | transcript_product=DNA-directed RNA polymerase III RPC11 | location=TGGT1_chrXI:2509608-2510841(+) | protein_length=106 | sequence_SO=chromosome | SO=protein_coding_gene | is_pseudo=false	0.027	1.723	13	1	1	1	106	12.4	8.02	0	1	1.127	0.17	0.903695	34.8	30.9	16.65	15.99	36.2	24.5	33.5	26.5	36.3	37.2	36.3	26.5	26.5	29.6	32.3	36.3	38.5	24.3	36	29.1	1
TGGT1_222880	High	IsMasterProtein	TGGT1_222880-t26_1-p1	transcript=TGGT1_222880-t26_1 | gene=TGGT1_222880 | organism=Toxoplasma_gondii_GT1 | gene_product=hypothetical protein | transcript_product=hypothetical protein | location=TGGT1_chrII:1258376-1264820(+) | protein_length=729 | sequence_SO=chromosome | SO=protein_coding_gene | is_pseudo=false	0	7.948	4	3	3	3	729	80.1	8.91	4.43	3	1.128	0.17	0.0190913	62.9	55.7	9.16	7.2	73.3	70.6	57.4	61.9	70.4	63.9	60.5	59.7	57.5	52.8	55.4	65.2	52.8	53.6	57.9	56	1
TGGT1_262950	High	IsMasterProtein	TGGT1_262950-t26_1-p1	transcript=TGGT1_262950-t26_1 | gene=TGGT1_262950 | organism=Toxoplasma_gondii_GT1 | gene_product=hypothetical protein | transcript_product=hypothetical protein | location=TGGT1_chrVIIb:876340-880422(+) | protein_length=1024 | sequence_SO=chromosome | SO=protein_coding_gene | is_pseudo=false	0.005	3.222	1	2	2	2	1024	113	8.51	3.21	2	1.128	0.17	0.0565266	271.6	240.8	11.25	3.43	240.1	315.9	235.5	290.1	243.8	290.2	254.4	293.3	244.3	249.1	230.2	240.2	241.4	245.2	224.4	237.1	1
TGGT1_272695	High	IsMasterProtein	TGGT1_272695-t26_1-p1	transcript=TGGT1_272695-t26_1 | gene=TGGT1_272695 | organism=Toxoplasma_gondii_GT1 | gene_product=hypothetical protein | transcript_product=hypothetical protein | location=TGGT1_chrVIII:3784797-3790451(-) | protein_length=614 | sequence_SO=chromosome | SO=protein_coding_gene | is_pseudo=false	0	16.825	8	6	7	6	614	65.6	5.95	15.33	6	1.128	0.17	0.000976699	691.4	612.9	3.98	4.55	686.2	719	669.8	712.8	664.5	714.1	643	696.7	577.6	592.7	625.8	642.2	583.1	646.3	600.2	637.5	1
TGGT1_289940	High	IsMasterProtein	TGGT1_289940-t26_1-p1	transcript=TGGT1_289940-t26_1 | gene=TGGT1_289940 | organism=Toxoplasma_gondii_GT1 | gene_product=Uroporphyrinogen_deCOase domain-containing protein [Source:UniProtKB/TrEMBL;Acc:S7UQ73] | transcript_product=uroporphyrinogen decarboxylase | location=TGGT1_chrIX:3340307-3347491(-) | protein_length=665 | sequence_SO=chromosome | SO=protein_coding_gene | is_pseudo=false	0	27.799	13	8	15	8	665	73.8	6.99	35.3	8	1.128	0.17	0.00328616	889.8	788.9	5.34	3.18	848.1	928.8	826.5	948.5	850.2	934.9	863	917.4	782	830.1	808.6	789.5	788.2	845.6	780.5	777.1	1
TGGT1_310790	High	IsMasterProtein	TGGT1_310790-t26_1-p1	transcript=TGGT1_310790-t26_1 | gene=TGGT1_310790 | organism=Toxoplasma_gondii_GT1 | gene_product=hypothetical protein | transcript_product=hypothetical protein | location=TGGT1_chrXI:1556574-1558606(+) | protein_length=219 | sequence_SO=chromosome | SO=protein_coding_gene | is_pseudo=false	0	79.014	51	9	77	9	219	24.7	4.92	301.65	9	1.128	0.17	0.507282	6315.6	5600.7	22.55	25.01	6336	6629	4898.5	6624	6289	2903.5	6295.2	6681.2	2819	6303.3	4120	5401.8	6059.6	5806.9	4119.9	6268.9	1
TGGT1_312065	High	IsMasterProtein	TGGT1_312065-t26_1-p1	transcript=TGGT1_312065-t26_1 | gene=TGGT1_312065 | organism=Toxoplasma_gondii_GT1 | gene_product=hypothetical protein | transcript_product=hypothetical protein | location=TGGT1_chrXI:2365577-2378498(-) | protein_length=1793 | sequence_SO=chromosome | SO=protein_coding_gene | is_pseudo=false	0.004	3.635	1	2	2	1	1793	199.2	5.81	2.23	2	1.128	0.17	0.384978	17.7	15.7	10.08	18.32	15.5	20.4	18.1	18.4	19.2	16.8	17.4	15.2	22	18.4	15.1	13.7	17.8	13.2	14	16.4	1
TGGT1_232310	High	IsMasterProtein	TGGT1_232310-t26_1-p1	transcript=TGGT1_232310-t26_1 | gene=TGGT1_232310 | organism=Toxoplasma_gondii_GT1 | gene_product=Endonuclease/exonuclease/phosphatase family protein [Source:UniProtKB/TrEMBL;Acc:S7V2M3] | transcript_product=endonuclease/exonuclease/phosphatase family protein | location=TGGT1_chrVIII:1997428-2000925(-) | protein_length=977 | sequence_SO=chromosome | SO=protein_coding_gene | is_pseudo=false	0	17.85	8	6	7	6	977	107.9	9.33	12.79	6	1.129	0.17	0.000974244	224.3	198.7	4.71	4.61	235.2	238.5	237	223.6	225	223.4	206	221.6	196.7	203.8	187.5	208.4	213.9	188.1	199.9	197.5	1
TGGT1_249650	High	IsMasterProtein	TGGT1_249650-t26_1-p1	transcript=TGGT1_249650-t26_1 | gene=TGGT1_249650 | organism=Toxoplasma_gondii_GT1 | gene_product=NAD(P)H-hydrate epimerase [Source:UniProtKB/TrEMBL;Acc:S7V055] | transcript_product=putative apolipoprotein A-I binding protein | location=TGGT1_chrXII:4645078-4650288(+) | protein_length=343 | sequence_SO=chromosome | SO=protein_coding_gene | is_pseudo=false	0	11.87	14	3	4	3	343	37.5	8.6	17.17	3	1.129	0.17	0.0028195	522.9	463.3	4.55	6.56	538.8	512.7	554.2	504.9	533.4	502.2	540.8	485	465.5	453.2	508	466.3	463.6	414.4	463	416.8	1
TGGT1_254660	High	IsMasterProtein	TGGT1_254660-t26_1-p1	transcript=TGGT1_254660-t26_1 | gene=TGGT1_254660 | organism=Toxoplasma_gondii_GT1 | gene_product=ANK_REP_REGION domain-containing protein [Source:UniProtKB/TrEMBL;Acc:S7UN58] | transcript_product=ankyrin repeat-containing protein | location=TGGT1_chrIII:1857884-1859917(-) | protein_length=290 | sequence_SO=chromosome | SO=protein_coding_gene | is_pseudo=false	0.003	3.885	3	1	1	1	290	31.8	8	3.68	1	1.129	0.17	0.127454	35.5	31.5	18.1	10.32	45.7	29.2	35.8	29.8	37.7	32.9	46.9	35.2	26.5	33.2	32.6	28.8	32.8	28.8	30.4	36.6	1
TGGT1_254820	High	IsMasterProtein	TGGT1_254820-t26_1-p1	transcript=TGGT1_254820-t26_1 | gene=TGGT1_254820 | organism=Toxoplasma_gondii_GT1 | gene_product=hypothetical protein | transcript_product=hypothetical protein | location=TGGT1_chrIII:1926655-1928361(+) | protein_length=568 | sequence_SO=chromosome | SO=protein_coding_gene | is_pseudo=false	0.003	4.062	3	1	1	1	568	63.8	9.09	5.36	1	1.129	0.17	0.593798	8.7	7.7	29.44	14.47	6.4	4.8	10.9	11.8	11.5	8.7	8.7	6.9	7.8	7.7	5.6	7.1	8	7.7	7.7	9.7	1
TGGT1_204100	High	IsMasterProtein	TGGT1_204100-t26_1-p1	transcript=TGGT1_204100-t26_1 | gene=TGGT1_204100 | organism=Toxoplasma_gondii_GT1 | gene_product=Protein kinase domain-containing protein [Source:UniProtKB/TrEMBL;Acc:S7WAA6] | transcript_product=eIF2 kinase IF2K-C | location=TGGT1_chrVIIa:1884266-1901952(-) | protein_length=3270 | sequence_SO=chromosome | SO=protein_coding_gene | is_pseudo=false	0	13.604	2	5	5	5	3270	348.3	7.34	4.65	5	1.114	0.16	0.00210314	149.4	134.2	4.72	5.72	145.3	165.1	143.4	151.4	147.5	146.8	156.9	153.4	130.2	137.6	125.2	143.1	133.1	135.2	120.7	140.6	1
TGGT1_205750	High	IsMasterProtein	TGGT1_205750-t26_1-p1	transcript=TGGT1_205750-t26_1 | gene=TGGT1_205750 | organism=Toxoplasma_gondii_GT1 | gene_product=HDAC_interact domain-containing protein [Source:UniProtKB/TrEMBL;Acc:S7UUL7] | transcript_product=histone deacetylase complex subunit Sin3 | location=TGGT1_chrVIIa:1085608-1090423(+) | protein_length=769 | sequence_SO=chromosome | SO=protein_coding_gene | is_pseudo=false	0	13.438	4	4	6	4	769	86.9	8.44	17.94	4	1.114	0.16	0.129795	171.5	154	7.31	5.02	170.5	172.5	142	158.7	173.9	175.6	178	159.5	163.2	158.6	156.2	168.8	149.5	148.8	146.2	151.9	1
TGGT1_211390	High	IsMasterProtein	TGGT1_211390-t26_1-p1	transcript=TGGT1_211390-t26_1 | gene=TGGT1_211390 | organism=Toxoplasma_gondii_GT1 | gene_product=ThiF domain-containing protein [Source:UniProtKB/TrEMBL;Acc:S7UJQ9] | transcript_product=hypothetical protein | location=TGGT1_chrIV:1692407-1697995(+) | protein_length=405 | sequence_SO=chromosome | SO=protein_coding_gene | is_pseudo=false	0	17.75	19	6	7	6	405	44	5.76	22.78	6	1.114	0.16	1.22739e-05	659.2	591.6	2.72	2.41	653	665.4	674.5	651.1	687.8	666.4	629.2	649	585.4	581.8	573.5	598.5	600.3	563.6	602.3	597.7	1
TGGT1_214480	Medium	IsMasterProtein	TGGT1_214480-t26_1-p1	transcript=TGGT1_214480-t26_1 | gene=TGGT1_214480 | organism=Toxoplasma_gondii_GT1 | gene_product=Replication factor a protein 3 protein [Source:UniProtKB/TrEMBL;Acc:S7URC5] | transcript_product=replication factor a protein 3 protein | location=TGGT1_chrX:6196524-6198205(+) | protein_length=205 | sequence_SO=chromosome | SO=protein_coding_gene | is_pseudo=false	0.011	2.67	4	1	2	1	205	21.6	5.47	2.54	1	1.114	0.16	0.0630502	142.4	127.8	10.05	7.33	155.9	163.5	129.3	144.1	132.2	129.3	163.6	140.8	121.6	125.6	119	130.6	130.1	140.5	121.4	145.4	1
TGGT1_243450	High	IsMasterProtein	TGGT1_243450-t26_1-p1	transcript=TGGT1_243450-t26_1 | gene=TGGT1_243450 | organism=Toxoplasma_gondii_GT1 | gene_product=Putative Ras-related protein Rab2BV [Source:UniProtKB/TrEMBL;Acc:S7VMR3] | transcript_product=putative Ras-related protein Rab2BV | location=TGGT1_chrVI:2558040-2561968(+) | protein_length=457 | sequence_SO=chromosome | SO=protein_coding_gene | is_pseudo=false	0.004	3.699	3	1	1	1	457	49.8	8.9	3.32	1	1.114	0.16	0.613851	60.4	54.2	11.22	10.62	60.5	53.3	60.3	46	61.1	62.8	66.2	53.8	54.6	59.1	63.4	63	53.9	53.5	46.2	51.1	1
TGGT1_255740	High	IsMasterProtein	TGGT1_255740-t26_1-p1	transcript=TGGT1_255740-t26_1 | gene=TGGT1_255740 | organism=Toxoplasma_gondii_GT1 | gene_product=RTR1-type domain-containing protein [Source:UniProtKB/TrEMBL;Acc:S7WI29] | transcript_product=hypothetical protein | location=TGGT1_chrVIIb:4590851-4599916(-) | protein_length=1706 | sequence_SO=chromosome | SO=protein_coding_gene | is_pseudo=false	0	11.631	3	4	4	4	1706	182.1	4.86	12.33	4	1.114	0.16	0.00162178	341.1	306.2	4.03	2.2	333.7	339.8	315.7	349.4	348.5	354.9	342.4	322.7	305.3	303.8	307.1	305.1	305	308.3	314.6	323.6	1
TGGT1_297900	High	IsMasterProtein	TGGT1_297900-t26_1-p1	transcript=TGGT1_297900-t26_1 | gene=TGGT1_297900 | organism=Toxoplasma_gondii_GT1 | gene_product=hypothetical protein | transcript_product=hypothetical protein | location=TGGT1_chrII:2079614-2083654(+) | protein_length=763 | sequence_SO=chromosome | SO=protein_coding_gene | is_pseudo=false	0	10.281	6	4	4	4	763	82.6	9.54	8.75	4	1.114	0.16	0.011656	348.5	312.7	6.7	3.25	324.6	372.6	326	387.9	333	355.3	341.8	368.4	312.6	311.8	301.7	335.1	326.5	312.1	312.9	317.5	1
TGGT1_214260	High	IsMasterProtein	TGGT1_214260-t26_1-p1	transcript=TGGT1_214260-t26_1 | gene=TGGT1_214260 | organism=Toxoplasma_gondii_GT1 | gene_product=PPDK_N domain-containing protein [Source:UniProtKB/TrEMBL;Acc:S7UQ91] | transcript_product=putative alpha-glucan water dikinase 1 | location=TGGT1_chrX:6069350-6083963(+) | protein_length=1715 | sequence_SO=chromosome | SO=protein_coding_gene | is_pseudo=false	0	122.354	24	35	55	35	1715	191.4	6.13	147.81	35	1.115	0.16	7.91844e-08	5039	4518.4	1.41	1.38	4944.4	5023.9	5141.1	5098.9	4937.8	5054.5	4999.5	5054.2	4529.1	4470.5	4507.6	4609.1	4483.4	4639.9	4490.8	4575.2	1
TGGT1_240050	High	IsMasterProtein	TGGT1_240050-t26_1-p1	transcript=TGGT1_240050-t26_1 | gene=TGGT1_240050 | organism=Toxoplasma_gondii_GT1 | gene_product=hypothetical protein | transcript_product=hypothetical protein | location=TGGT1_chrVI:1016340-1024919(+) | protein_length=1839 | sequence_SO=chromosome | SO=protein_coding_gene | is_pseudo=false	0	21.035	4	7	8	7	1839	195.7	8.57	20.35	7	1.115	0.16	0.0129073	270.7	242.8	7.5	4.21	281.9	269.3	288.5	255.1	314.2	272.1	252.9	258.5	261.7	244.3	233.2	243.2	258.4	235.9	242.5	237.9	1
TGGT1_255650	High	IsMasterProtein	TGGT1_255650-t26_1-p1	transcript=TGGT1_255650-t26_1 | gene=TGGT1_255650 | organism=Toxoplasma_gondii_GT1 | gene_product=Palmitoyltransferase [Source:UniProtKB/TrEMBL;Acc:A0A125YQK5] | transcript_product=DHHC zinc finger domain-containing protein | location=TGGT1_chrVIIb:4661320-4666883(+) | protein_length=471 | sequence_SO=chromosome | SO=protein_coding_gene | is_pseudo=false	0	9.969	9	3	3	3	471	53	7.01	8.98	3	1.115	0.16	0.104638	87.6	78.6	10.01	7.98	82.8	87.3	99.4	87.9	96.2	76.8	97.6	77.8	75.2	79.6	77.7	73.9	84.7	71.1	86.8	88.4	1
TGGT1_264770	High	IsMasterProtein	TGGT1_264770-t26_1-p1	transcript=TGGT1_264770-t26_1 | gene=TGGT1_264770 | organism=Toxoplasma_gondii_GT1 | gene_product=hypothetical protein | transcript_product=hypothetical protein | location=TGGT1_chrIX:1857065-1859396(+) | protein_length=377 | sequence_SO=chromosome | SO=protein_coding_gene | is_pseudo=false	0	18.224	16	5	13	5	377	39.5	4.96	42.92	5	1.115	0.16	0.0241243	1219.3	1093.7	8.76	1.82	1368.8	1136	1334.9	1144.8	1298.7	1133	1325.4	1120.1	1102.3	1109.1	1089.7	1127.8	1083.7	1073.1	1097.7	1066.4	1
TGGT1_305820	High	IsMasterProtein	TGGT1_305820-t26_1-p1	transcript=TGGT1_305820-t26_1 | gene=TGGT1_305820 | organism=Toxoplasma_gondii_GT1 | gene_product=SGS domain-containing protein [Source:UniProtKB/TrEMBL;Acc:A0A125YLY4] | transcript_product=SGS domain-containing protein | location=TGGT1_chrIX:5384029-5387924(+) | protein_length=262 | sequence_SO=chromosome | SO=protein_coding_gene | is_pseudo=false	0	39.996	37	10	20	10	262	30	6.81	47.1	10	1.115	0.16	1.70351e-05	2049.4	1838.2	2.19	2.53	2108.3	2053.8	2026.7	1977	2051.5	1980.5	2047.2	2075	1767.8	1913.5	1827.5	1804.5	1848.9	1863	1818.9	1886.1	1	Methylthio [C53]
TGGT1_202310	High	IsMasterProtein	TGGT1_202310-t26_1-p1	transcript=TGGT1_202310-t26_1 | gene=TGGT1_202310 | organism=Toxoplasma_gondii_GT1 | gene_product=Probable tRNA N6-adenosine threonylcarbamoyltransferase [Source:UniProtKB/TrEMBL;Acc:S7UUY1] | transcript_product=O-sialoglycoprotein endopeptidase | location=TGGT1_chrVIIa:3327812-3330409(+) | protein_length=580 | sequence_SO=chromosome | SO=protein_coding_gene | is_pseudo=false	0	8.001	6	2	3	2	580	62.6	7.09	8.35	2	1.116	0.16	0.136039	39.8	35.7	18.18	8.86	36.9	39.7	39.9	36.4	42	56.7	46.5	32.2	31.7	34	35.6	40.5	35.8	31.5	35.8	38.8	1
TGGT1_220230B	High	IsMasterProtein	TGGT1_220230B-t26_1-p1	transcript=TGGT1_220230B-t26_1 | gene=TGGT1_220230B | organism=Toxoplasma_gondii_GT1 | gene_product=Leucine rich repeat-containing protein [Source:UniProtKB/TrEMBL;Acc:S7UFW7] | transcript_product=leucine rich repeat-containing protein | location=TGGT1_chrV:125444-126743(-) | protein_length=324 | sequence_SO=chromosome | SO=protein_coding_gene | is_pseudo=false	0	9.435	19	4	4	4	324	34.5	4.78	3.17	4	1.116	0.16	0.00118254	91.9	82.3	4.67	4.71	89.3	89.1	91.2	100.5	98.3	91.4	97.5	92.4	83.4	80.2	78.3	90.4	85.5	81.3	85.2	80	1
TGGT1_263750	High	IsMasterProtein	TGGT1_263750-t26_1-p1	transcript=TGGT1_263750-t26_1 | gene=TGGT1_263750 | organism=Toxoplasma_gondii_GT1 | gene_product=hypothetical protein | transcript_product=hypothetical protein | location=TGGT1_chrVIIb:311492-315191(-) | protein_length=1159 | sequence_SO=chromosome | SO=protein_coding_gene | is_pseudo=false	0	16.997	6	6	7	6	1159	126.6	5.29	16.36	6	1.116	0.16	0.00400803	224	200.7	5.82	2.9	221.9	227.4	226.1	213	236.6	200.9	239.3	212.7	194.5	205.5	189	202.3	202.7	202.5	193	199.1	1
TGGT1_273905	High	IsMasterProtein	TGGT1_273905-t26_1-p1	transcript=TGGT1_273905-t26_1 | gene=TGGT1_273905 | organism=Toxoplasma_gondii_GT1 | gene_product=hypothetical protein | transcript_product=hypothetical protein | location=TGGT1_chrVIII:3178311-3184467(+) | protein_length=373 | sequence_SO=chromosome | SO=protein_coding_gene | is_pseudo=false	0	38.903	29	9	20	9	373	41.1	6.55	52.01	9	1.116	0.16	3.20102e-05	1593.7	1428.2	2.81	1.73	1595.2	1623.5	1592.3	1628.5	1526	1552.5	1533.7	1641.8	1433.5	1404.1	1389.9	1436.8	1416.4	1445.6	1423	1469.2	1
TGGT1_275430	High	IsMasterProtein	TGGT1_275430-t26_1-p1	transcript=TGGT1_275430-t26_1 | gene=TGGT1_275430 | organism=Toxoplasma_gondii_GT1 | gene_product=hypothetical protein | transcript_product=hypothetical protein | location=TGGT1_chrX:7139961-7155637(+) | protein_length=2647 | sequence_SO=chromosome | SO=protein_coding_gene | is_pseudo=false	0.003	4.575	1	2	2	2	2647	293.5	5.25	2.21	2	1.116	0.16	0.154319	42	37.6	11.9	6.72	37.5	46	41.8	35.3	49.2	42.3	43.2	35.8	40.1	36.4	33.7	39.3	35.7	38.9	40.5	35.3	1
TGGT1_285750	High	IsMasterProtein	TGGT1_285750-t26_1-p1	transcript=TGGT1_285750-t26_1 | gene=TGGT1_285750 | organism=Toxoplasma_gondii_GT1 | gene_product=6,7-dihydropteridine reductase [Source:UniProtKB/TrEMBL;Acc:S7VWK1] | transcript_product=6,7-dihydropteridine reductase | location=TGGT1_chrV:2108594-2111262(+) | protein_length=460 | sequence_SO=chromosome | SO=protein_coding_gene | is_pseudo=false	0.004	3.566	2	1	1	1	460	50.1	8.44	3.82	1	1.116	0.16	0.356364	47.3	42.4	12.57	13.27	44.6	47.2	35.3	54	54.2	48.6	46.5	47.5	34.3	39.5	52.3	41.6	45	43.3	50.1	41.4	1
TGGT1_220170	High	IsMasterProtein	TGGT1_220170-t26_1-p1	transcript=TGGT1_220170-t26_1 | gene=TGGT1_220170 | organism=Toxoplasma_gondii_GT1 | gene_product=hypothetical protein | transcript_product=hypothetical protein | location=TGGT1_chrV:86182-87669(-) | protein_length=270 | sequence_SO=chromosome | SO=protein_coding_gene | is_pseudo=false	0.003	4.156	8	1	1	1	270	30.6	4.68	4.66	1	1.117	0.16	0.777052	7.8	7	41.8	16.74	13.4	3.4	9	6.7	9.2	6.6	4.6	11.3	7.2	7.3	5.4	9.2	6.7	7.2	6.1	6	1
TGGT1_227060	High	IsMasterProtein	TGGT1_227060-t26_1-p1	transcript=TGGT1_227060-t26_1 | gene=TGGT1_227060 | organism=Toxoplasma_gondii_GT1 | gene_product=hypothetical protein | transcript_product=hypothetical protein | location=TGGT1_chrX:1013160-1025615(+) | protein_length=1273 | sequence_SO=chromosome | SO=protein_coding_gene | is_pseudo=false	0	12.436	4	4	4	4	1273	139.3	5.87	8.81	4	1.117	0.16	0.0140149	188.8	169.1	6.5	4.25	204	169	205.3	183.2	193.1	180	193.2	184.6	165.9	165.3	162.7	176.4	173.7	185	168.4	169.8	1
TGGT1_235150	High	IsMasterProtein	TGGT1_235150-t26_1-p1	transcript=TGGT1_235150-t26_1 | gene=TGGT1_235150 | organism=Toxoplasma_gondii_GT1 | gene_product=MFS domain-containing protein [Source:UniProtKB/TrEMBL;Acc:S7UW99] | transcript_product=transporter, major facilitator family protein | location=TGGT1_chrX:4537454-4539145(+) | protein_length=563 | sequence_SO=chromosome | SO=protein_coding_gene | is_pseudo=false	0	9.253	6	3	4	3	563	60.5	5.8	9.63	3	1.117	0.16	0.00354084	566.6	507.2	4.33	4.8	603.2	568.9	591.7	564.3	560	539.9	593.9	537.2	553.9	506	493	499.3	485.5	508.3	542.3	532.3	1
TGGT1_239560	High	IsMasterProtein	TGGT1_239560-t26_1-p1	transcript=TGGT1_239560-t26_1 | gene=TGGT1_239560 | organism=Toxoplasma_gondii_GT1 | gene_product=Myosin motor domain-containing protein [Source:UniProtKB/TrEMBL;Acc:S7URV6] | transcript_product=myosin E | location=TGGT1_chrVI:750607-761551(-) | protein_length=830 | sequence_SO=chromosome | SO=protein_coding_gene | is_pseudo=false	0.001	6.904	5	4	4	4	830	93.1	7.28	5.79	4	1.117	0.16	0.00625264	236.2	211.4	6.15	4.76	238.7	220.2	228.9	234.8	268	224.7	237.6	240.7	214.9	204.5	196.9	225.5	216.9	207.9	204.3	223.8	1
TGGT1_249698	Medium	IsMasterProtein	TGGT1_249698-t26_1-p1	transcript=TGGT1_249698-t26_1 | gene=TGGT1_249698 | organism=Toxoplasma_gondii_GT1 | gene_product=hypothetical protein | transcript_product=hypothetical protein | location=TGGT1_chrXII:4676121-4679331(-) | protein_length=255 | sequence_SO=chromosome | SO=protein_coding_gene | is_pseudo=false	0.025	1.772	4	1	1	1	255	26.8	5.66	0	1	1.117	0.16	0.0697358	41.4	37.1	13.32	10.11	42.1	40.1	46.7	38.2	53.6	41.8	41	35.1	32.5	33	39.4	32.4	35.8	38.3	42.2	39	1
TGGT1_260170	High	IsMasterProtein	TGGT1_260170-t26_1-p1	transcript=TGGT1_260170-t26_1 | gene=TGGT1_260170 | organism=Toxoplasma_gondii_GT1 | gene_product=Elongation factor G, mitochondrial [Source:UniProtKB/TrEMBL;Acc:S7WEH9] | transcript_product=putative elongation factor EF-G | location=TGGT1_chrVIIb:2455204-2462803(-) | protein_length=883 | sequence_SO=chromosome | SO=protein_coding_gene | is_pseudo=false	0	21.179	7	7	10	7	883	96.6	8.18	24.63	7	1.117	0.16	0.0646317	642.9	575.4	9.18	3.4	601	680.8	607.2	696.2	575.2	700.9	558.5	685.3	617.5	574.3	593.8	571.6	576.8	550	570.1	576.4	1
TGGT1_267740	High	IsMasterProtein	TGGT1_267740-t26_1-p1	transcript=TGGT1_267740-t26_1 | gene=TGGT1_267740 | organism=Toxoplasma_gondii_GT1 | gene_product=hypothetical protein | transcript_product=hypothetical protein | location=TGGT1_chrIX:229747-230769(+) | protein_length=340 | sequence_SO=chromosome | SO=protein_coding_gene | is_pseudo=false	0	12.406	15	4	6	4	340	37	9.36	12.81	4	1.117	0.16	0.217017	293.7	263	14.95	4.91	235.9	343.6	268.4	328.2	257.8	321.3	248.1	333.4	240.2	278.3	263.9	278.9	253.1	256.1	262	266.1	1
TGGT1_281630	High	IsMasterProtein	TGGT1_281630-t26_1-p1	transcript=TGGT1_281630-t26_1 | gene=TGGT1_281630 | organism=Toxoplasma_gondii_GT1 | gene_product=Lactamase_B domain-containing protein [Source:UniProtKB/TrEMBL;Acc:S7UVM0] | transcript_product=hydroxyacylglutathione hydrolase | location=TGGT1_chrVIIa:4131337-4136707(+) | protein_length=450 | sequence_SO=chromosome | SO=protein_coding_gene | is_pseudo=false	0	35.039	18	8	20	8	450	48.1	8.63	56.39	8	1.117	0.16	1.84083e-07	2265.5	2027.4	1.26	1.78	2255.2	2317.4	2306.1	2256.3	2295.9	2247.2	2242.6	2274.7	2023.3	1993.1	2047	2069.9	1959.7	2005.7	2031.4	2055.1	1
TGGT1_291030	High	IsMasterProtein	TGGT1_291030-t26_1-p1	transcript=TGGT1_291030-t26_1 | gene=TGGT1_291030 | organism=Toxoplasma_gondii_GT1 | gene_product=RING-type domain-containing protein [Source:UniProtKB/TrEMBL;Acc:S7UPB7] | transcript_product=zinc finger, C3HC4 type (RING finger) domain-containing protein | location=TGGT1_chrIX:3883156-3887979(+) | protein_length=991 | sequence_SO=chromosome | SO=protein_coding_gene | is_pseudo=false	0.003	3.965	2	1	2	1	991	109.4	6.11	7.47	1	1.117	0.16	0.245077	111.6	100	11.24	10.97	103.4	125.1	120.4	114.7	93.4	125	96.2	108.7	99.4	94.1	100.6	123	85.7	97.4	102	110.3	1
TGGT1_293740	High	IsMasterProtein	TGGT1_293740-t26_1-p1	transcript=TGGT1_293740-t26_1 | gene=TGGT1_293740 | organism=Toxoplasma_gondii_GT1 | gene_product=hypothetical protein | transcript_product=hypothetical protein | location=TGGT1_chrIa:526546-528232(+) | protein_length=96 | sequence_SO=chromosome | SO=protein_coding_gene | is_pseudo=false	0	14.183	52	4	8	4	96	10.6	5.52	25.41	4	1.117	0.16	0.916167	522.8	468.2	27.74	32.97	491.8	645.6	338.7	555.7	388.6	287.6	633.2	560.6	285.2	626.3	307.3	438.7	687.9	499.6	358	642.8	1
TGGT1_203280	High	IsMasterProtein	TGGT1_203280-t26_1-p1	transcript=TGGT1_203280-t26_1 | gene=TGGT1_203280 | organism=Toxoplasma_gondii_GT1 | gene_product=hypothetical protein | transcript_product=hypothetical protein | location=TGGT1_chrVIIa:2520041-2522364(-) | protein_length=192 | sequence_SO=chromosome | SO=protein_coding_gene | is_pseudo=false	0.001	6.576	13	2	3	2	192	22.5	9.96	8.86	2	1.118	0.16	0.456446	31.3	28	14.01	18.42	31.4	34.8	31.2	30.4	34.9	35.5	22.4	28	35.1	24.6	20.3	35.4	25.4	27.2	31.8	28.7	1
TGGT1_220160	High	IsMasterProtein	TGGT1_220160-t26_1-p1	transcript=TGGT1_220160-t26_1 | gene=TGGT1_220160 | organism=Toxoplasma_gondii_GT1 | gene_product=WD domain-containing protein [Source:UniProtKB/TrEMBL;Acc:S7VP99] | transcript_product=WD domain-containing protein | location=TGGT1_chrV:74066-79989(+) | protein_length=554 | sequence_SO=chromosome | SO=protein_coding_gene | is_pseudo=false	0	17.138	13	6	7	6	554	59.3	7.9	15.95	6	1.118	0.16	9.26235e-05	740.2	662.1	3.69	1.97	802.4	766.2	768.7	741.9	738.3	738.4	723.1	719.4	658	645.6	664.1	687.3	650.4	666.2	660.2	672.8	1
TGGT1_237260	High	IsMasterProtein	TGGT1_237260-t26_1-p1	transcript=TGGT1_237260-t26_1 | gene=TGGT1_237260 | organism=Toxoplasma_gondii_GT1 | gene_product=Coiled-coil domain containing 124 family protein [Source:UniProtKB/TrEMBL;Acc:S7VZ02] | transcript_product=Coiled-coil domain containing 124 family protein | location=TGGT1_chrX:5702983-5705967(+) | protein_length=231 | sequence_SO=chromosome | SO=protein_coding_gene | is_pseudo=false	0	32.229	43	10	12	10	231	25.4	9.72	26.18	10	1.118	0.16	0.000380132	1372.8	1227.8	1.92	3.89	1318.3	1376.8	1398.6	1368.8	1342.4	1384.4	1359	1386.5	1271.1	1228.9	1205.6	1246.5	1118.9	1226.6	1265.6	1220.3	1
TGGT1_244130	High	IsMasterProtein	TGGT1_244130-t26_1-p1	transcript=TGGT1_244130-t26_1 | gene=TGGT1_244130 | organism=Toxoplasma_gondii_GT1 | gene_product=hypothetical protein | transcript_product=hypothetical protein | location=TGGT1_chrVI:2963739-2972106(+) | protein_length=2426 | sequence_SO=chromosome | SO=protein_coding_gene | is_pseudo=false	0	8.401	2	4	4	4	2426	254.2	7.88	8.81	4	1.118	0.16	0.000374796	302.1	270.2	3.17	4.14	298.3	301.9	316.5	312.5	321	301.8	302.2	293	285.8	269.1	263.6	282.1	264.1	258.6	271.3	289	1
TGGT1_272650	High	IsMasterProtein	TGGT1_272650-t26_1-p1	transcript=TGGT1_272650-t26_1 | gene=TGGT1_272650 | organism=Toxoplasma_gondii_GT1 | gene_product=PDEase domain-containing protein [Source:UniProtKB/TrEMBL;Acc:S7V394] | transcript_product=3'5'-cyclic nucleotide phosphodiesterase domain-containing protein | location=TGGT1_chrVIII:3812437-3818063(-) | protein_length=1294 | sequence_SO=chromosome | SO=protein_coding_gene | is_pseudo=false	0	9.036	3	4	4	4	1294	141.2	7.14	9.16	4	1.118	0.16	0.00781941	338	302.4	6.2	4.96	380.1	320.9	324.2	343.3	314.1	335.2	340.8	353.3	296.9	295.5	336.5	303.9	300.8	306.6	307.4	284.4	1
TGGT1_318760	High	IsMasterProtein	TGGT1_318760-t26_1-p1	transcript=TGGT1_318760-t26_1 | gene=TGGT1_318760 | organism=Toxoplasma_gondii_GT1 | gene_product=hypothetical protein | transcript_product=hypothetical protein | location=TGGT1_chrIV:1046468-1049934(-) | protein_length=318 | sequence_SO=chromosome | SO=protein_coding_gene | is_pseudo=false	0	18.757	25	7	7	7	318	36.3	6.15	19.18	7	1.118	0.16	0.00322355	449.3	401.9	4.13	4.31	410.3	456	476.7	450.3	443.8	448.4	442.7	453.1	412.9	398.1	397.1	405.8	384.1	396.8	439.9	422.4	1
TGGT1_208800	Medium	IsMasterProtein	TGGT1_208800-t26_1-p1	transcript=TGGT1_208800-t26_1 | gene=TGGT1_208800 | organism=Toxoplasma_gondii_GT1 | gene_product=Mediator complex subunit MED18 [Source:UniProtKB/TrEMBL;Acc:S7UJH8] | transcript_product=mediator complex subunit MED18 | location=TGGT1_chrIb:882627-885696(+) | protein_length=302 | sequence_SO=chromosome | SO=protein_coding_gene | is_pseudo=false	0.014	2.426	2	1	1	1	302	33.8	6.55	1.84	1	1.119	0.16	0.852259	29.5	26.4	17.25	17.36	27.6	23.7	24.1	36	31.7	23.1	31.6	33.9	25.6	26.9	25.8	31.8	38	29.8	25.8	22.1	1
TGGT1_209790	High	IsMasterProtein	TGGT1_209790-t26_1-p1	transcript=TGGT1_209790-t26_1 | gene=TGGT1_209790 | organism=Toxoplasma_gondii_GT1 | gene_product=Radical_SAM domain-containing protein [Source:UniProtKB/TrEMBL;Acc:S7UIE8] | transcript_product=radical SAM domain-containing protein | location=TGGT1_chrIb:1467646-1474198(+) | protein_length=610 | sequence_SO=chromosome | SO=protein_coding_gene | is_pseudo=false	0	11.597	9	3	4	3	610	67.8	5.87	13.33	3	1.119	0.16	0.011687	325.3	290.7	9.42	5.4	386.9	319.4	356.7	309.6	331.2	306.5	378.9	315.6	291	284.2	301.3	290.4	321.8	276.8	271.3	298.2	1
TGGT1_216470	Medium	IsMasterProtein	TGGT1_216470-t26_1-p1	transcript=TGGT1_216470-t26_1 | gene=TGGT1_216470 | organism=Toxoplasma_gondii_GT1 | gene_product=hypothetical protein | transcript_product=hypothetical protein | location=TGGT1_chrXI:6046807-6048771(-) | protein_length=501 | sequence_SO=chromosome | SO=protein_coding_gene | is_pseudo=false	0.032	1.623	2	1	1	1	501	54.1	4.6	1.78	1	1.119	0.16	0.206573	29.5	26.4	14.07	7.09	32.9	28.1	34.5	25.9	31.1	26.4	35.4	24.4	24.9	28.8	25.1	30.1	27.9	26.7	26.1	25.4	1
TGGT1_225380	High	IsMasterProtein	TGGT1_225380-t26_1-p1	transcript=TGGT1_225380-t26_1 | gene=TGGT1_225380 | organism=Toxoplasma_gondii_GT1 | gene_product=hypothetical protein | transcript_product=hypothetical protein | location=TGGT1_chrX:2178711-2186172(+) | protein_length=447 | sequence_SO=chromosome | SO=protein_coding_gene | is_pseudo=false	0	14.372	9	4	4	4	447	51.4	9.94	13.54	4	1.119	0.16	0.0271194	177	158.1	5.67	7.69	184.8	160.9	193.4	180.6	173.8	169.7	180.2	171.4	164.1	146	184.2	152.1	149.6	152.8	164.4	163.6	1
TGGT1_242840	High	IsMasterProtein	TGGT1_242840-t26_1-p1	transcript=TGGT1_242840-t26_1 | gene=TGGT1_242840 | organism=Toxoplasma_gondii_GT1 | gene_product=Membrane protein [Source:UniProtKB/TrEMBL;Acc:A0A125YNN8] | transcript_product=membrane protein | location=TGGT1_chrVI:2258062-2258421(+) | protein_length=119 | sequence_SO=chromosome | SO=protein_coding_gene | is_pseudo=false	0	11.773	40	4	10	4	119	13.9	9.42	20.53	4	1.119	0.16	0.000585811	898	802.5	3.23	4.25	932.3	855	939	894.4	883	901.7	926.1	881	794.7	802.7	826.2	802.4	852.1	778.3	847.6	750.8	1
TGGT1_249000	High	IsMasterProtein	TGGT1_249000-t26_1-p1	transcript=TGGT1_249000-t26_1 | gene=TGGT1_249000 | organism=Toxoplasma_gondii_GT1 | gene_product=Regulator of chromosome condensation (RCC1) repeat-containing protein [Source:UniProtKB/TrEMBL;Acc:S7V0G9] | transcript_product=regulator of chromosome condensation (RCC1) repeat-containing protein | location=TGGT1_chrXII:4225644-4227821(-) | protein_length=725 | sequence_SO=chromosome | SO=protein_c…	0.001	6.75	4	3	3	3	725	76.8	8.37	4.07	3	1.119	0.16	0.00721193	313.4	280.1	7.74	3.85	319.5	299.1	354.4	295.5	347.5	307.5	348.5	299.9	273.4	287.1	274.2	292.3	282.2	278	299.5	266.7	1
TGGT1_255470	High	IsMasterProtein	TGGT1_255470-t26_1-p1	transcript=TGGT1_255470-t26_1 | gene=TGGT1_255470 | organism=Toxoplasma_gondii_GT1 | gene_product=Hflx-type G domain-containing protein [Source:UniProtKB/TrEMBL;Acc:S7WAW5] | transcript_product=hypothetical protein | location=TGGT1_chrVIIb:4704841-4714229(+) | protein_length=1139 | sequence_SO=chromosome | SO=protein_coding_gene | is_pseudo=false	0.005	3.335	2	1	1	1	1139	125.1	6.64	2.73	1	1.119	0.16	0.68252	6.1	5.4	41.52	36.27	4.2	6.2	12.5	6.5	5.9	4.8	5	10.1	6.2	6.6	4.8	4.7	3.8	9.5	9.3	4.3	1
TGGT1_263810	High	IsMasterProtein	TGGT1_263810-t26_1-p1	transcript=TGGT1_263810-t26_1 | gene=TGGT1_263810 | organism=Toxoplasma_gondii_GT1 | gene_product=hypothetical protein | transcript_product=hypothetical protein | location=TGGT1_chrVIIb:289697-292142(+) | protein_length=213 | sequence_SO=chromosome | SO=protein_coding_gene | is_pseudo=false	0	35.451	54	6	14	6	213	23.7	4.3	49.44	6	1.119	0.16	0.167793	934	834.5	15.78	8.55	916.1	1017.7	875.4	1058.3	815.4	680.4	1150.8	952.2	720.9	888.3	718.3	836.2	865.2	832.9	778.3	891.6	1	Methylthio [C45]
TGGT1_269940	High	IsMasterProtein	TGGT1_269940-t26_1-p1	transcript=TGGT1_269940-t26_1 | gene=TGGT1_269940 | organism=Toxoplasma_gondii_GT1 | gene_product=ASCH domain-containing protein [Source:UniProtKB/TrEMBL;Acc:S7V3Y0] | transcript_product=zinc finger motif, C2HC5-type protein | location=TGGT1_chrVIII:5507751-5513794(+) | protein_length=1191 | sequence_SO=chromosome | SO=protein_coding_gene | is_pseudo=false	0	25.348	8	9	12	9	1191	132.7	5.58	19.15	9	1.119	0.16	0.00587523	495.5	442.8	4.61	6.03	534.8	496	504.5	506.4	495	475.8	460.6	478.3	468.1	440.9	444.8	452.4	388.1	427	473.5	435.2	1
TGGT1_273320	High	IsMasterProtein	TGGT1_273320-t26_1-p1	transcript=TGGT1_273320-t26_1 | gene=TGGT1_273320 | organism=Toxoplasma_gondii_GT1 | gene_product=hypothetical protein | transcript_product=hypothetical protein | location=TGGT1_chrVIII:3591254-3594418(-) | protein_length=238 | sequence_SO=chromosome | SO=protein_coding_gene | is_pseudo=false	0.001	6.938	9	2	2	1	238	25.5	4.6	6.22	2	1.119	0.16	0.506253	11.1	9.9	25.59	23.26	8.4	12.8	8.9	14.6	7.1	11.5	10.7	14.7	8.4	9.9	8.2	10.5	9.9	6.7	10.6	14.4	1
TGGT1_292360	High	IsMasterProtein	TGGT1_292360-t26_1-p1	transcript=TGGT1_292360-t26_1 | gene=TGGT1_292360 | organism=Toxoplasma_gondii_GT1 | gene_product=hypothetical protein | transcript_product=hypothetical protein | location=TGGT1_chrIX:4513119-4519781(-) | protein_length=1062 | sequence_SO=chromosome | SO=protein_coding_gene | is_pseudo=false	0.001	7.288	3	3	3	3	1062	117.3	9.41	6.92	3	1.119	0.16	0.0452175	88	78.6	8.2	6.45	71.7	96	87.7	86.5	90	88.2	81.7	88.4	70.7	82.7	71.1	82.9	81.2	80.1	74.2	77.1	1
TGGT1_320070	High	IsMasterProtein	TGGT1_320070-t26_1-p1	transcript=TGGT1_320070-t26_1 | gene=TGGT1_320070 | organism=Toxoplasma_gondii_GT1 | gene_product=RING-type domain-containing protein [Source:UniProtKB/TrEMBL;Acc:S7UJH1] | transcript_product=CDK-activating kinase assembly factor MAT1 protein | location=TGGT1_chrIV:484063-486505(-) | protein_length=279 | sequence_SO=chromosome | SO=protein_coding_gene | is_pseudo=false	0.001	6.13	9	3	3	3	279	32.7	8.07	4.56	3	1.119	0.16	0.00143735	268.4	239.8	3.06	4.29	257.8	257.2	271.9	280.2	270.9	259.9	271.6	265.9	234.9	245.1	260.2	243.6	254	230.8	236	234.4	1
TGGT1_321480	High	IsMasterProtein	TGGT1_321480-t26_1-p1	transcript=TGGT1_321480-t26_1 | gene=TGGT1_321480 | organism=Toxoplasma_gondii_GT1 | gene_product=SAG-related sequence SRS12B [Source:UniProtKB/TrEMBL;Acc:A0A125YHD2] | transcript_product=SAG-related sequence SRS12B | location=TGGT1_chrIb:1780181-1781335(-) | protein_length=384 | sequence_SO=chromosome | SO=protein_coding_gene | is_pseudo=false	0	12.161	13	4	8	4	384	40.6	5.25	14.08	4	1.119	0.16	0.0416766	292	261	9.32	7.01	267.7	333.8	285.9	298.3	258.1	315.8	272.5	319.9	260.8	287.9	260.7	261.2	229.9	280.3	244.4	262.5	1
TGGT1_210810	High	IsMasterProtein	TGGT1_210810-t26_1-p1	transcript=TGGT1_210810-t26_1 | gene=TGGT1_210810 | organism=Toxoplasma_gondii_GT1 | gene_product=hypothetical protein | transcript_product=hypothetical protein | location=TGGT1_chrIV:1968347-1970259(+) | protein_length=107 | sequence_SO=chromosome | SO=protein_coding_gene | is_pseudo=false	0	15.446	27	4	8	4	107	11.9	5.5	21.94	4	1.12	0.16	0.000172453	536	478.6	1.79	3.61	533.4	538.6	527.8	530.7	525.9	540.3	542.2	555.7	449.3	498.6	481.2	490.7	462.5	476.1	498.9	475.5	1
TGGT1_221570	High	IsMasterProtein	TGGT1_221570-t26_1-p1	transcript=TGGT1_221570-t26_1 | gene=TGGT1_221570 | organism=Toxoplasma_gondii_GT1 | gene_product=Putative pre-rRNA-processing protein [Source:UniProtKB/TrEMBL;Acc:S7UKH5] | transcript_product=putative pre-rRNA-processing protein | location=TGGT1_chrII:428259-430701(-) | protein_length=347 | sequence_SO=chromosome | SO=protein_coding_gene | is_pseudo=false	0.005	3.463	7	2	2	2	347	39.3	10.29	0	2	1.12	0.16	0.0257297	59.4	53.1	11.53	11.66	77.5	57.2	58	60.8	57.7	69.2	58.1	61.9	57.1	46.6	56.2	59.8	51.5	54.7	50.9	41.2	1
TGGT1_253880	High	IsMasterProtein	TGGT1_253880-t26_1-p1	transcript=TGGT1_253880-t26_1 | gene=TGGT1_253880 | organism=Toxoplasma_gondii_GT1 | gene_product=Elongation of fatty acids protein [Source:UniProtKB/TrEMBL;Acc:S7VVE9] | transcript_product=GNS1/SUR4 family protein | location=TGGT1_chrIII:1247523-1249706(+) | protein_length=727 | sequence_SO=chromosome | SO=protein_coding_gene | is_pseudo=false	0	10.453	6	4	4	4	727	78.1	8.78	10.16	4	1.12	0.16	0.00438737	442.7	395.1	5.27	3.9	477.4	448.1	456.8	412.9	459.4	414.6	437.4	423	390.8	384	398.7	401.8	433.9	400	388	391.6	1
TGGT1_294920	Medium	IsMasterProtein	TGGT1_294920-t26_1-p1	transcript=TGGT1_294920-t26_1 | gene=TGGT1_294920 | organism=Toxoplasma_gondii_GT1 | gene_product=General transcription factor IIH subunit [Source:UniProtKB/TrEMBL;Acc:S7UI17] | transcript_product=general transcription factor IIH polypeptide 2 GTF2H2 | location=TGGT1_chrIa:1252805-1259587(+) | protein_length=478 | sequence_SO=chromosome | SO=protein_coding_gene | is_pseudo=false	0.014	2.415	2	1	1	1	478	51.5	6.29	2.69	1	1.12	0.16	0.12097	122.9	109.7	8.83	5.04	126.7	125.7	130.1	107.3	102.9	126.7	120.2	109.8	103.1	116.9	106	113.2	110.2	101.8	115.1	109.2	1
TGGT1_298030	Low	IsMasterProtein	TGGT1_298030-t26_1-p1	transcript=TGGT1_298030-t26_1 | gene=TGGT1_298030 | organism=Toxoplasma_gondii_GT1 | gene_product=Putative Ubiquinol-cytochrome c chaperone [Source:UniProtKB/TrEMBL;Acc:S7UKS0] | transcript_product=putative Ubiquinol-cytochrome c chaperone | location=TGGT1_chrII:2188930-2194231(+) | protein_length=697 | sequence_SO=chromosome | SO=protein_coding_gene | is_pseudo=false	0.058	1.338	1	1	1	1	697	78.1	9.14	1.89	1	1.12	0.16	0.190931	26	23.2	13.36	9.68	29.8	25.4	26.8	24.7	21.5	21.8	31.4	26.6	22.7	21.8	26.5	24.7	23.1	19.2	25.3	23.3	1
TGGT1_306910	High	IsMasterProtein	TGGT1_306910-t26_1-p1	transcript=TGGT1_306910-t26_1 | gene=TGGT1_306910 | organism=Toxoplasma_gondii_GT1 | gene_product=hypothetical protein | transcript_product=hypothetical protein | location=TGGT1_chrXI:170075-180114(+) | protein_length=520 | sequence_SO=chromosome | SO=protein_coding_gene | is_pseudo=false	0	27.113	22	8	9	8	520	55.7	5.07	29.02	8	1.12	0.16	0.000896375	500.8	447.2	4.45	3.5	499.2	466.5	525.9	505.9	461.4	510.7	487.2	502.4	446.1	448.4	456.8	450.1	442.7	406.7	449.8	436.5	1
TGGT1_313870	High	IsMasterProtein	TGGT1_313870-t26_1-p1	transcript=TGGT1_313870-t26_1 | gene=TGGT1_313870 | organism=Toxoplasma_gondii_GT1 | gene_product=Zinc finger, C3HC4 type (RING finger) domain-containing protein [Source:UniProtKB/TrEMBL;Acc:S7W2G5] | transcript_product=zinc finger, C3HC4 type (RING finger) domain-containing protein | location=TGGT1_chrXI:3721894-3730275(+) | protein_length=2194 | sequence_SO=chromosome | SO=protein_coding_gene |…	0	14.615	3	4	4	4	2194	230.6	6.09	13.67	4	1.12	0.16	0.00765407	79.1	70.6	6.84	4.42	80	79.4	73.3	73.8	89.1	78.7	84.8	75.7	67	74	68.1	67.8	73.1	68	73.5	73.5	1
TGGT1_241840	High	IsMasterProtein	TGGT1_241840-t26_1-p1	transcript=TGGT1_241840-t26_1 | gene=TGGT1_241840 | organism=Toxoplasma_gondii_GT1 | gene_product=CUE domain-containing protein [Source:UniProtKB/TrEMBL;Acc:S7W0I6] | transcript_product=hypothetical protein | location=TGGT1_chrVI:1675280-1679442(+) | protein_length=453 | sequence_SO=chromosome | SO=protein_coding_gene | is_pseudo=false	0	11.827	10	4	4	4	453	49.1	7.8	13.56	4	1.121	0.16	0.00581615	382.3	341	8.4	3.47	423.5	388.6	446.4	369.7	432.9	370.9	359.8	376	332.2	320.4	350.7	344.4	354.3	335.5	337.6	353.5	1
TGGT1_246090	High	IsMasterProtein	TGGT1_246090-t26_1-p1	transcript=TGGT1_246090-t26_1 | gene=TGGT1_246090 | organism=Toxoplasma_gondii_GT1 | gene_product=hypothetical protein | transcript_product=hypothetical protein | location=TGGT1_chrXII:2587046-2593831(+) | protein_length=955 | sequence_SO=chromosome | SO=protein_coding_gene | is_pseudo=false	0	36.71	17	13	22	13	955	105.1	6.37	47.38	13	1.121	0.16	0.0010305	736.5	657	3.59	4.16	752.1	722.7	687.8	726.6	763.1	701.3	747.2	746.5	631.5	689	670.4	635.1	650.5	701.8	627.6	663.6	1
TGGT1_246970	High	IsMasterProtein	TGGT1_246970-t26_1-p1	transcript=TGGT1_246970-t26_1 | gene=TGGT1_246970 | organism=Toxoplasma_gondii_GT1 | gene_product=HRDC domain-containing protein [Source:UniProtKB/TrEMBL;Acc:S7WH19] | transcript_product=3'-5' exonuclease domain-containing protein | location=TGGT1_chrXII:2974590-2984891(-) | protein_length=1353 | sequence_SO=chromosome | SO=protein_coding_gene | is_pseudo=false	0	8.226	3	3	4	3	1353	145.8	6.43	5.85	3	1.121	0.16	0.182321	195.7	174.6	9.72	5.91	223.4	173.3	204.3	187.6	184.7	204.2	209.3	168.8	198.6	172.7	173.8	179.9	172	174.6	195.3	174.6	1
TGGT1_263260	High	IsMasterProtein	TGGT1_263260-t26_1-p1	transcript=TGGT1_263260-t26_1 | gene=TGGT1_263260 | organism=Toxoplasma_gondii_GT1 | gene_product=Transporter, major facilitator family protein [Source:UniProtKB/TrEMBL;Acc:S7UXZ6] | transcript_product=transporter, major facilitator family protein | location=TGGT1_chrVIIb:650692-653775(-) | protein_length=1027 | sequence_SO=chromosome | SO=protein_coding_gene | is_pseudo=false	0.003	3.997	2	1	1	1	1027	109.9	6.6	3.31	1	1.121	0.16	0.173785	23.4	20.9	14.28	11.25	30.3	24.9	21.3	24.6	22.5	18.8	22.3	24.3	17.9	20.6	22.4	24.9	17.9	20.7	21.1	22.3	1
TGGT1_316300	High	IsMasterProtein	TGGT1_316300-t26_1-p1	transcript=TGGT1_316300-t26_1 | gene=TGGT1_316300 | organism=Toxoplasma_gondii_GT1 | gene_product=ATP-dependent DNA helicase, RecQ family protein [Source:UniProtKB/TrEMBL;Acc:S7UMF2] | transcript_product=ATP-dependent DNA helicase, RecQ family protein | location=TGGT1_chrXI:5170259-5174470(+) | protein_length=932 | sequence_SO=chromosome | SO=protein_coding_gene | is_pseudo=false	0	8.246	3	3	3	3	932	103.2	7.62	7.64	3	1.121	0.16	0.00104164	347.5	310	4.84	4.41	357.1	373.2	337.8	373.8	328.9	339.2	339	355.9	299.6	303.2	301.5	321	288.1	322.6	317	326.5	1
TGGT1_204540	High	IsMasterProtein	TGGT1_204540-t26_1-p1	transcript=TGGT1_204540-t26_1 | gene=TGGT1_204540 | organism=Toxoplasma_gondii_GT1 | gene_product=DUF367 domain-containing protein [Source:UniProtKB/TrEMBL;Acc:S7UUQ0] | transcript_product=DUF367 domain-containing protein | location=TGGT1_chrVIIa:1629169-1631598(+) | protein_length=586 | sequence_SO=chromosome | SO=protein_coding_gene | is_pseudo=false	0.004	3.715	4	2	2	2	586	63.6	8.35	1.83	2	1.106	0.15	0.450648	74.6	67.4	13.65	11.22	59.2	74.2	90.2	74.9	85.6	64.2	71.2	76.5	67.2	66.4	76.4	68.5	85.5	60.3	67.7	65	1
TGGT1_214560	High	IsMasterProtein	TGGT1_214560-t26_1-p1	transcript=TGGT1_214560-t26_1 | gene=TGGT1_214560 | organism=Toxoplasma_gondii_GT1 | gene_product=hypothetical protein | transcript_product=hypothetical protein | location=TGGT1_chrX:6244621-6254504(-) | protein_length=1552 | sequence_SO=chromosome | SO=protein_coding_gene | is_pseudo=false	0.001	7.558	2	3	4	3	1552	166.1	5.31	7.28	3	1.106	0.15	0.0197558	150.3	135.8	5.44	6.74	153.7	131.3	157.5	151.2	148.8	149.3	156.2	148.9	124.3	142.7	134.9	127.5	123.4	147	136.7	143.2	1
TGGT1_217688	High	IsMasterProtein	TGGT1_217688-t26_1-p1	transcript=TGGT1_217688-t26_1 | gene=TGGT1_217688 | organism=Toxoplasma_gondii_GT1 | gene_product=hypothetical protein | transcript_product=hypothetical protein | location=TGGT1_chrXII:1956181-1958535(-) | protein_length=784 | sequence_SO=chromosome | SO=protein_coding_gene | is_pseudo=false	0.001	5.189	4	2	2	2	784	85.2	8.59	3.33	2	1.106	0.15	0.691095	28	25.3	15.44	17	23.8	27.9	23	29.6	32.2	31	20.4	28	19	25	25.6	22.2	29.3	32.6	28.9	23.4	1
TGGT1_229290	High	IsMasterProtein	TGGT1_229290-t26_1-p1	transcript=TGGT1_229290-t26_1 | gene=TGGT1_229290 | organism=Toxoplasma_gondii_GT1 | gene_product=DUF4110 domain-containing protein [Source:UniProtKB/TrEMBL;Acc:S7WIY1] | transcript_product=kelch repeat-containing protein | location=TGGT1_chrVIII:132539-141658(-) | protein_length=933 | sequence_SO=chromosome | SO=protein_coding_gene | is_pseudo=false	0	20.809	10	7	10	7	933	104.3	6.71	27.81	7	1.106	0.15	0.0441539	327.6	296.1	7.9	3.39	328	310.2	372.6	293.3	330.8	327.3	329.9	292.8	302.6	278.8	296.6	306.6	287.5	286.7	305.7	295.7	1	Methylthio [C178]
TGGT1_234510	High	IsMasterProtein	TGGT1_234510-t26_1-p1	transcript=TGGT1_234510-t26_1 | gene=TGGT1_234510 | organism=Toxoplasma_gondii_GT1 | gene_product=Ankyrin repeat-containing protein [Source:UniProtKB/TrEMBL;Acc:S7WBI1] | transcript_product=ankyrin repeat-containing protein | location=TGGT1_chrX:4327248-4329080(-) | protein_length=311 | sequence_SO=chromosome | SO=protein_coding_gene | is_pseudo=false	0	10.696	10	3	6	3	311	33.9	5.33	13.74	3	1.106	0.15	0.0412576	218.1	197.2	7.78	5.98	239.5	203.6	214.3	226.1	246.9	195.7	215.2	221	189.7	221.3	188.1	200.8	196.6	212.6	189	197.8	1
TGGT1_244700	High	IsMasterProtein	TGGT1_244700-t26_1-p1	transcript=TGGT1_244700-t26_1 | gene=TGGT1_244700 | organism=Toxoplasma_gondii_GT1 | gene_product=NAD(+)/NADH kinase domain-containing protein [Source:UniProtKB/TrEMBL;Acc:S7W7F5] | transcript_product=NAD(+)/NADH kinase domain-containing protein | location=TGGT1_chrVI:3371487-3383046(+) | protein_length=2109 | sequence_SO=chromosome | SO=protein_coding_gene | is_pseudo=false	0	12.427	3	5	6	5	2109	228.8	7.06	12.19	5	1.106	0.15	0.0275434	215.2	194.6	6.58	6.89	214.8	218.3	244.9	231.7	209.4	209	215.5	199.1	181.1	185.9	193.8	219.8	195.3	205.8	183.7	208.3	1
TGGT1_253400	High	IsMasterProtein	TGGT1_253400-t26_1-p1	transcript=TGGT1_253400-t26_1 | gene=TGGT1_253400 | organism=Toxoplasma_gondii_GT1 | gene_product=PRKCSH_1 domain-containing protein [Source:UniProtKB/TrEMBL;Acc:S7VVA5] | transcript_product=hypothetical protein | location=TGGT1_chrIII:903206-909213(-) | protein_length=964 | sequence_SO=chromosome | SO=protein_coding_gene | is_pseudo=false	0.001	7.275	2	2	3	2	964	104.4	6.24	9.19	2	1.106	0.15	0.00168329	248.6	224.7	4.38	2.99	249.7	255.8	260.8	234.6	251.9	246.7	227.9	247.4	226.8	214.4	229.1	233.3	222.7	218.6	228	216.6	1
TGGT1_305490	Medium	IsMasterProtein	TGGT1_305490-t26_1-p1	transcript=TGGT1_305490-t26_1 | gene=TGGT1_305490 | organism=Toxoplasma_gondii_GT1 | gene_product=PDCD2_C domain-containing protein [Source:UniProtKB/TrEMBL;Acc:S7UH18] | transcript_product=programmed cell death protein 2, c-terminal domain-containing protein | location=TGGT1_chrIX:5217847-5221455(+) | protein_length=482 | sequence_SO=chromosome | SO=protein_coding_gene | is_pseudo=false	0.048	1.437	2	1	1	1	482	52.5	4.86	0	1	1.106	0.15	0.202533	24.3	21.9	11.38	9.65	24.5	24.1	21.4	25	25.2	23.6	28.9	19.6	18.7	24.1	21.7	20	20.2	23.8	22.2	24.4	1
TGGT1_209440	High	IsMasterProtein	TGGT1_209440-t26_1-p1	transcript=TGGT1_209440-t26_1 | gene=TGGT1_209440 | organism=Toxoplasma_gondii_GT1 | gene_product=hypothetical protein | transcript_product=hypothetical protein | location=TGGT1_chrIb:1233594-1244657(+) | protein_length=3633 | sequence_SO=chromosome | SO=protein_coding_gene | is_pseudo=false	0.001	6.268	1	2	2	2	3633	383	8.41	4.8	2	1.107	0.15	0.183376	63.6	57.4	7.02	7.61	62.2	64.4	67.5	63.4	55.4	56.6	66.8	63.8	67.4	55.4	55.6	61.5	59.9	59.4	54.6	54.7	1
TGGT1_227890	High	IsMasterProtein	TGGT1_227890-t26_1-p1	transcript=TGGT1_227890-t26_1 | gene=TGGT1_227890 | organism=Toxoplasma_gondii_GT1 | gene_product=hypothetical protein | transcript_product=hypothetical protein | location=TGGT1_chrX:662571-663359(-) | protein_length=262 | sequence_SO=chromosome | SO=protein_coding_gene | is_pseudo=false	0	8.293	11	3	3	3	262	28.9	9.35	7.94	3	1.107	0.15	0.00331196	274.9	248.5	3.97	4.96	274.2	275.7	273.7	286.2	291	291.1	263.8	263.8	242.4	257	268.2	249.8	234	247.2	267.1	240.3	1
TGGT1_240890	High	IsMasterProtein	TGGT1_240890-t26_1-p1	transcript=TGGT1_240890-t26_1 | gene=TGGT1_240890 | organism=Toxoplasma_gondii_GT1 | gene_product=Probable ATP-dependent 6-phosphofructokinase [Source:UniProtKB/TrEMBL;Acc:S7W0F4] | transcript_product=6-phosphofructokinase | location=TGGT1_chrVI:1494349-1507600(+) | protein_length=1399 | sequence_SO=chromosome | SO=protein_coding_gene | is_pseudo=false	0	56.464	13	17	30	16	1399	154.6	6.64	67.3	17	1.107	0.15	4.07976e-06	2097.4	1894.6	2.11	1.62	2008	2071.6	2091.8	2120.7	2102.9	2130.5	2143.9	2060.8	1899	1929.7	1887.5	1830.4	1922	1912.5	1887	1890.3	1
TGGT1_261060	High	IsMasterProtein	TGGT1_261060-t26_1-p1	transcript=TGGT1_261060-t26_1 | gene=TGGT1_261060 | organism=Toxoplasma_gondii_GT1 | gene_product=Diphthamide biosynthesis protein 2-related domain-containing protein [Source:UniProtKB/TrEMBL;Acc:S7WEE2] | transcript_product=diphthamide biosynthesis protein 2-related domain-containing protein | location=TGGT1_chrVIIb:1852264-1856907(-) | protein_length=559 | sequence_SO=chromosome | SO=protein_co…	0.001	6.915	4	3	4	3	559	60.9	7.05	4.11	3	1.107	0.15	0.13277	107.3	96.9	7.2	10.55	90.6	104.5	109.1	117.2	103.4	110.3	105.4	109.3	80.8	98.5	115.4	88.5	103.4	94.5	95.4	99.5	1
TGGT1_289180	Low	IsMasterProtein	TGGT1_289180-t26_1-p1	transcript=TGGT1_289180-t26_1 | gene=TGGT1_289180 | organism=Toxoplasma_gondii_GT1 | gene_product=Thioredoxin domain-containing protein [Source:UniProtKB/TrEMBL;Acc:A0A125YMW4] | transcript_product=putative thioredoxin family redox-active protein | location=TGGT1_chrIX:2853589-2856673(-) | protein_length=208 | sequence_SO=chromosome | SO=protein_coding_gene | is_pseudo=false	0.065	1.287	5	1	1	1	208	22.7	8.28	0	1	1.107	0.15	0.0254077	233.7	211.2	5.55	6.06	220.5	233.3	250.3	234.1	215.6	248.6	222.7	241	208.1	203.2	238.6	207.1	219.3	218.4	196	214.3	1
TGGT1_319910	High	IsMasterProtein	TGGT1_319910-t26_1-p1	transcript=TGGT1_319910-t26_1 | gene=TGGT1_319910 | organism=Toxoplasma_gondii_GT1 | gene_product=WD_REPEATS_REGION domain-containing protein [Source:UniProtKB/TrEMBL;Acc:S7UJE2] | transcript_product=WD domain, G-beta repeat-containing protein | location=TGGT1_chrIV:614295-620319(-) | protein_length=535 | sequence_SO=chromosome | SO=protein_coding_gene | is_pseudo=false	0	8.553	10	3	4	3	535	57.3	6.02	8.41	3	1.107	0.15	0.016111	108	97.6	9.29	5.97	112.9	107.9	134.8	101.1	106	108.1	105.3	110.2	93.7	100.2	91.9	87.5	103.2	102.7	101.7	95.1	1
TGGT1_320588	High	IsMasterProtein	TGGT1_320588-t26_1-p1	transcript=TGGT1_320588-t26_1 | gene=TGGT1_320588 | organism=Toxoplasma_gondii_GT1 | gene_product=Glyco_hydro_35 domain-containing protein [Source:UniProtKB/TrEMBL;Acc:S7UJW4] | transcript_product=glycosyl hydrolases family 35 protein | location=TGGT1_chrIV:179297-193857(+) | protein_length=1876 | sequence_SO=chromosome | SO=protein_coding_gene | is_pseudo=false	0	15.767	4	6	7	6	1876	207.3	8.81	17.99	6	1.107	0.15	0.00559951	355.3	320.9	4.74	5.03	320.1	344.6	371.7	362.1	350.3	360.4	370.6	349.9	316.3	333.1	312.9	325.5	336.7	329.4	286.5	312.2	1
TGGT1_320670	High	IsMasterProtein	TGGT1_320670-t26_1-p1	transcript=TGGT1_320670-t26_1 | gene=TGGT1_320670 | organism=Toxoplasma_gondii_GT1 | gene_product=Putative vacuolar protein sorting 16 [Source:UniProtKB/TrEMBL;Acc:S7UIZ1] | transcript_product=putative vacuolar protein sorting 16 | location=TGGT1_chrIV:94373-109895(+) | protein_length=920 | sequence_SO=chromosome | SO=protein_coding_gene | is_pseudo=false	0	15.857	7	6	6	6	920	101.4	7.27	12.17	6	1.107	0.15	0.0480897	160.5	145	6.9	6.73	150.2	150.3	169.4	146.2	171	166.8	173.7	154.5	140.7	136.9	145.2	144.9	158.5	131	154	156.9	1
TGGT1_207710	High	IsMasterProtein	TGGT1_207710-t26_1-p1	transcript=TGGT1_207710-t26_1 | gene=TGGT1_207710 | organism=Toxoplasma_gondii_GT1 | gene_product=CDP-diacylglycerol--inositol 3-phosphatidyltransferase [Source:UniProtKB/TrEMBL;Acc:A0A125YYB1] | transcript_product=putative phosphatidylinositol synthase | location=TGGT1_chrIb:239752-244462(+) | protein_length=258 | sequence_SO=chromosome | SO=protein_coding_gene | is_pseudo=false	0.001	5.224	7	2	2	2	258	27.8	8.07	4.16	2	1.108	0.15	0.0101622	224.5	202.6	3.34	6.36	216.4	221.7	213.9	233	230.8	217.9	227.3	231.2	198.8	222.7	202.9	203.6	202.2	210.3	176.6	200.8	1
TGGT1_237210	High	IsMasterProtein	TGGT1_237210-t26_1-p1	transcript=TGGT1_237210-t26_1 | gene=TGGT1_237210 | organism=Toxoplasma_gondii_GT1 | gene_product=Protein kinase domain-containing protein [Source:UniProtKB/TrEMBL;Acc:S7VYZ3] | transcript_product=Tyrosine kinase-like (TKL) protein | location=TGGT1_chrX:5671514-5675816(+) | protein_length=935 | sequence_SO=chromosome | SO=protein_coding_gene | is_pseudo=false	0.001	6.142	2	2	2	2	935	100.6	7.44	4.65	2	1.108	0.15	0.481694	152.9	138	9.72	6.14	153.6	125.5	167.4	139.8	131.4	159.9	152.7	153.2	160.5	137.7	136.8	146.6	135.4	134.1	144	138.4	1
TGGT1_241150	High	IsMasterProtein	TGGT1_241150-t26_1-p1	transcript=TGGT1_241150-t26_1 | gene=TGGT1_241150 | organism=Toxoplasma_gondii_GT1 | gene_product=N2227 domain-containing protein [Source:UniProtKB/TrEMBL;Acc:S7W0D7] | transcript_product=hypothetical protein | location=TGGT1_chrVI:1620097-1626374(-) | protein_length=592 | sequence_SO=chromosome | SO=protein_coding_gene | is_pseudo=false	0	20.879	12	8	14	8	592	65.1	5.63	35.48	8	1.108	0.15	0.000394956	761.1	687	3.46	3.4	731.9	773.9	811.4	764.1	735.6	777.6	741.4	758.1	680.6	685.6	676.9	722.4	643.3	690.6	688.5	709.1	1
TGGT1_254220	High	IsMasterProtein	TGGT1_254220-t26_1-p1	transcript=TGGT1_254220-t26_1 | gene=TGGT1_254220 | organism=Toxoplasma_gondii_GT1 | gene_product=RRM domain-containing protein [Source:UniProtKB/TrEMBL;Acc:S7ULZ1] | transcript_product=hypothetical protein | location=TGGT1_chrIII:1519422-1526676(-) | protein_length=826 | sequence_SO=chromosome | SO=protein_coding_gene | is_pseudo=false	0.003	4.612	3	2	2	2	826	84.2	6.51	2.45	2	1.108	0.15	0.0268043	170.7	154.1	7.47	4.71	150.6	179.2	161.8	184.6	173.8	187.7	161.4	167.6	139.6	152.1	158.2	159.1	152.4	164.3	152.3	155.8	1
TGGT1_263360	High	IsMasterProtein	TGGT1_263360-t26_1-p1	transcript=TGGT1_263360-t26_1 | gene=TGGT1_263360 | organism=Toxoplasma_gondii_GT1 | gene_product=WD_REPEATS_REGION domain-containing protein [Source:UniProtKB/TrEMBL;Acc:S7UXP1] | transcript_product=WD domain, G-beta repeat-containing protein | location=TGGT1_chrVIIb:571346-585455(-) | protein_length=1581 | sequence_SO=chromosome | SO=protein_coding_gene | is_pseudo=false	0	12.972	4	5	6	5	1581	169.8	8.9	12.95	5	1.108	0.15	0.00764803	248.8	224.5	5.01	3.2	247.5	251.4	250.1	239.3	222.9	231.9	256.5	257.4	221.9	215.2	213.4	232.5	223.1	232.2	228.6	226	1
TGGT1_278900	High	IsMasterProtein	TGGT1_278900-t26_1-p1	transcript=TGGT1_278900-t26_1 | gene=TGGT1_278900 | organism=Toxoplasma_gondii_GT1 | gene_product=putative protein kinase | transcript_product=putative protein kinase | location=TGGT1_chrXII:5685638-5689516(-) | protein_length=602 | sequence_SO=chromosome | SO=protein_coding_gene | is_pseudo=false	0	20.723	11	6	8	6	602	64.2	7.2	15.41	6	1.108	0.15	0.0022825	463.9	418.6	4.18	2.62	476.1	457.7	489.5	440.4	470.2	444	437.4	474.9	420.5	425.3	416.8	443.4	410.8	416.1	433.6	413.7	1
TGGT1_314770	High	IsMasterProtein	TGGT1_314770-t26_1-p1	transcript=TGGT1_314770-t26_1 | gene=TGGT1_314770 | organism=Toxoplasma_gondii_GT1 | gene_product=tRNA (Guanine-N1)-methyltransferase [Source:UniProtKB/TrEMBL;Acc:S7VV05] | transcript_product=tRNA (guanine-N1)-methyltransferase | location=TGGT1_chrXI:4218279-4225227(+) | protein_length=506 | sequence_SO=chromosome | SO=protein_coding_gene | is_pseudo=false	0	11.409	9	4	5	4	506	56.1	9.03	15.79	4	1.108	0.15	0.00407262	109.4	98.7	7.19	4.46	103.2	116.1	121.7	108.5	105.6	126.1	110.3	108.1	99.9	95.4	98.3	104.7	89.4	98.4	99.9	99.1	1
TGGT1_319570	High	IsMasterProtein	TGGT1_319570-t26_1-p1	transcript=TGGT1_319570-t26_1 | gene=TGGT1_319570 | organism=Toxoplasma_gondii_GT1 | gene_product=WD_REPEATS_REGION domain-containing protein [Source:UniProtKB/TrEMBL;Acc:S7UK59] | transcript_product=WD domain, G-beta repeat-containing protein | location=TGGT1_chrIV:846413-854218(+) | protein_length=690 | sequence_SO=chromosome | SO=protein_coding_gene | is_pseudo=false	0	25.594	12	8	10	8	690	75.7	8.19	28.95	8	1.108	0.15	0.0034574	717.5	647.8	4.64	3.38	698.5	700.6	724.9	714.8	720.1	649.8	764.3	735	656.3	684	654.7	638.3	640.9	670.6	613.4	637	1
TGGT1_219460	High	IsMasterProtein	TGGT1_219460-t26_1-p1	transcript=TGGT1_219460-t26_1 | gene=TGGT1_219460 | organism=Toxoplasma_gondii_GT1 | gene_product=hypothetical protein | transcript_product=hypothetical protein | location=TGGT1_chrXII:861747-865934(+) | protein_length=1283 | sequence_SO=chromosome | SO=protein_coding_gene | is_pseudo=false	0	59.305	14	17	23	17	1283	136.2	6.06	54.32	17	1.109	0.15	2.11155e-05	1533.7	1383.4	2.66	2.19	1616.4	1547.3	1537	1530.4	1514.6	1540.8	1516.4	1471	1372.6	1360.8	1390	1376.8	1397.9	1330.1	1404.5	1430.6	1	Methylthio [C1008]
TGGT1_221460	High	IsMasterProtein	TGGT1_221460-t26_1-p1	transcript=TGGT1_221460-t26_1 | gene=TGGT1_221460 | organism=Toxoplasma_gondii_GT1 | gene_product=Phosphoglycerate mutase family protein [Source:UniProtKB/TrEMBL;Acc:S7ULE8] | transcript_product=phosphoglycerate mutase family protein | location=TGGT1_chrII:349484-355588(+) | protein_length=450 | sequence_SO=chromosome | SO=protein_coding_gene | is_pseudo=false	0	15.031	10	5	6	5	450	48.4	7.11	15.07	5	1.109	0.15	0.00365346	375.9	339.1	7.04	4.83	374.4	352.9	409.5	358.3	429.1	377.5	400.3	364.4	310.3	347.8	357.3	340.4	339.8	319.1	319.4	338.4	1
TGGT1_255430	High	IsMasterProtein	TGGT1_255430-t26_1-p1	transcript=TGGT1_255430-t26_1 | gene=TGGT1_255430 | organism=Toxoplasma_gondii_GT1 | gene_product=Rad9 protein [Source:UniProtKB/TrEMBL;Acc:S7V224] | transcript_product=Rad9 protein | location=TGGT1_chrVIIb:4735984-4742097(-) | protein_length=805 | sequence_SO=chromosome | SO=protein_coding_gene | is_pseudo=false	0.003	4.333	2	2	2	2	805	88.5	5.5	4.57	2	1.109	0.15	0.00961241	175.2	158	4.41	4.85	176.2	165.9	178.1	178.9	174.2	156.5	171.9	176.6	144.2	151.8	167.4	164.3	159.3	153.7	156.8	163.7	1
TGGT1_258700	Medium	IsMasterProtein	TGGT1_258700-t26_1-p1	transcript=TGGT1_258700-t26_1 | gene=TGGT1_258700 | organism=Toxoplasma_gondii_GT1 | gene_product=MFS domain-containing protein [Source:UniProtKB/TrEMBL;Acc:S7UZ90] | transcript_product=transporter, major facilitator family protein | location=TGGT1_chrVIIb:3208618-3216942(-) | protein_length=775 | sequence_SO=chromosome | SO=protein_coding_gene | is_pseudo=false	0.027	1.734	2	1	1	1	775	83	7.88	0	1	1.109	0.15	0.0264098	108.6	98	8.11	7.26	112.2	123.9	122.5	117.7	104.6	104.3	100.7	105.1	114.4	99	96	101.3	95.6	97.4	89.3	98.5	1
TGGT1_269430	High	IsMasterProtein	TGGT1_269430-t26_1-p1	transcript=TGGT1_269430-t26_1 | gene=TGGT1_269430 | organism=Toxoplasma_gondii_GT1 | gene_product=Polyprenyl synthetase superfamily protein [Source:UniProtKB/TrEMBL;Acc:S7WDN0] | transcript_product=polyprenyl synthetase superfamily protein | location=TGGT1_chrVIII:5799514-5805657(+) | protein_length=676 | sequence_SO=chromosome | SO=protein_coding_gene | is_pseudo=false	0.001	6.227	5	3	3	3	676	72.5	8.5	6.26	3	1.109	0.15	0.0426447	201	181.3	9.1	7.19	208.2	177.6	197.8	183	219.7	184.6	228.8	204.2	159.9	182.8	184.2	188.3	198.4	168.7	179.8	165.4	1
TGGT1_280390	High	IsMasterProtein	TGGT1_280390-t26_1-p1	transcript=TGGT1_280390-t26_1 | gene=TGGT1_280390 | organism=Toxoplasma_gondii_GT1 | gene_product=HEAT repeat-containing protein [Source:UniProtKB/TrEMBL;Acc:S7UU66] | transcript_product=HEAT repeat-containing protein | location=TGGT1_chrVIIa:446826-465570(+) | protein_length=4124 | sequence_SO=chromosome | SO=protein_coding_gene | is_pseudo=false	0.009	2.758	0	2	2	2	4124	440.9	8.16	1.62	2	1.109	0.15	0.0140231	98.1	88.4	5.38	6.66	90.9	91.3	99.4	93.4	106.8	98.1	98.1	99	86.3	92	92.7	80.7	93.9	79.2	90.6	82.7	1
TGGT1_290240	High	IsMasterProtein	TGGT1_290240-t26_1-p1	transcript=TGGT1_290240-t26_1 | gene=TGGT1_290240 | organism=Toxoplasma_gondii_GT1 | gene_product=hypothetical protein | transcript_product=hypothetical protein | location=TGGT1_chrIX:3470859-3474815(+) | protein_length=792 | sequence_SO=chromosome | SO=protein_coding_gene | is_pseudo=false	0.001	5.795	4	3	3	3	792	88.3	6.89	5.54	3	1.109	0.15	0.230496	137.9	124.3	13.2	10.36	154.6	121.2	171.2	137.7	138	126.4	154	118.4	141.2	120.2	146.1	106.7	135.5	121.6	126.9	117.7	1
TGGT1_306440	High	IsMasterProtein	TGGT1_306440-t26_1-p1	transcript=TGGT1_306440-t26_1 | gene=TGGT1_306440 | organism=Toxoplasma_gondii_GT1 | gene_product=UBA domain-containing protein [Source:UniProtKB/TrEMBL;Acc:S7VWQ6] | transcript_product=hypothetical protein | location=TGGT1_chrIX:5859042-5870119(+) | protein_length=899 | sequence_SO=chromosome | SO=protein_coding_gene | is_pseudo=false	0	8.508	3	3	3	3	899	98.3	6.09	7.22	3	1.109	0.15	0.271573	76.1	68.6	9.39	5.27	78.9	66.6	59.8	76.2	72.6	76	77	79.9	67	70.2	64.8	71.4	64.4	73	73.6	66.6	1
TGGT1_314295	High	IsMasterProtein	TGGT1_314295-t26_1-p1	transcript=TGGT1_314295-t26_1 | gene=TGGT1_314295 | organism=Toxoplasma_gondii_GT1 | gene_product=Ribosomal l25 family protein [Source:UniProtKB/TrEMBL;Acc:S7W2E4] | transcript_product=ribosomal l25 family protein | location=TGGT1_chrXI:3951643-3956234(+) | protein_length=583 | sequence_SO=chromosome | SO=protein_coding_gene | is_pseudo=false	0.001	5.329	4	2	2	2	583	63.2	8.06	2.2	2	1.109	0.15	0.0397566	122.7	110.7	5.54	5.84	115.4	113.4	132.1	127.6	115.6	122.7	127.4	122.8	121.5	110.3	113.5	110.1	104.6	111	123.4	107.2	1
TGGT1_320220	High	IsMasterProtein	TGGT1_320220-t26_1-p1	transcript=TGGT1_320220-t26_1 | gene=TGGT1_320220 | organism=Toxoplasma_gondii_GT1 | gene_product=Rieske domain-containing protein [Source:UniProtKB/TrEMBL;Acc:S7UK06] | transcript_product=putative ubiquinol cytochrome c oxidoreductase | location=TGGT1_chrIV:370998-374481(-) | protein_length=487 | sequence_SO=chromosome | SO=protein_coding_gene | is_pseudo=false	0	65.881	38	14	41	14	487	54.8	9.23	141.93	14	1.109	0.15	0.000452179	3713.1	3347.5	3.49	2.91	3816.6	3658.7	3809.8	3562.9	3773.7	3527	3768.4	3519.7	3417.1	3290.2	3445.8	3405.7	3245.1	3193.7	3434.6	3287.1	1
TGGT1_209020	High	IsMasterProtein	TGGT1_209020-t26_1-p1	transcript=TGGT1_209020-t26_1 | gene=TGGT1_209020 | organism=Toxoplasma_gondii_GT1 | gene_product=hypothetical protein | transcript_product=hypothetical protein | location=TGGT1_chrIb:1003267-1010006(-) | protein_length=934 | sequence_SO=chromosome | SO=protein_coding_gene | is_pseudo=false	0	10.642	5	4	4	4	934	101.8	9.2	8.79	4	1.11	0.15	0.0259369	88.1	79.4	7.44	6.28	97.3	89.3	92	78.7	84.9	90	86.9	78.3	77.8	69.5	81.1	83.2	72.6	77	81.3	82.3	1
TGGT1_224220	High	IsMasterProtein	TGGT1_224220-t26_1-p1	transcript=TGGT1_224220-t26_1 | gene=TGGT1_224220 | organism=Toxoplasma_gondii_GT1 | gene_product=Serine/threonine-protein phosphatase [Source:UniProtKB/TrEMBL;Acc:S7UWK0] | transcript_product=serine/threonine-protein phosphatase PP2A catalytic subunit | location=TGGT1_chrX:3121213-3124971(+) | protein_length=347 | sequence_SO=chromosome | SO=protein_coding_gene | is_pseudo=false	0	8.707	10	3	3	3	347	39.1	5.31	10.2	3	1.11	0.15	0.0897379	263.1	237	9.52	5.31	291.8	254.1	277.4	249.4	272.5	231.1	292.1	229.7	242	241.1	231.6	244.6	223.6	233	264.4	228.6	1
TGGT1_227260	High	IsMasterProtein	TGGT1_227260-t26_1-p1	transcript=TGGT1_227260-t26_1 | gene=TGGT1_227260 | organism=Toxoplasma_gondii_GT1 | gene_product=RIO domain-containing protein [Source:UniProtKB/TrEMBL;Acc:S7UXL5] | transcript_product=RIO1 family protein | location=TGGT1_chrX:965748-971287(-) | protein_length=506 | sequence_SO=chromosome | SO=protein_coding_gene | is_pseudo=false	0.001	6.734	5	3	3	3	506	57.9	6.18	6.55	3	1.11	0.15	0.0628568	163.9	147.7	10.61	7.25	184.8	163.1	164.8	155.6	187.5	132.9	165.1	154.9	129.9	153.5	152.2	156.1	144.4	151	141.7	129.2	1
TGGT1_252310	High	IsMasterProtein	TGGT1_252310-t26_1-p1	transcript=TGGT1_252310-t26_1 | gene=TGGT1_252310 | organism=Toxoplasma_gondii_GT1 | gene_product=hypothetical protein | transcript_product=hypothetical protein | location=TGGT1_chrIII:470184-470903(-) | protein_length=239 | sequence_SO=chromosome | SO=protein_coding_gene | is_pseudo=false	0	9.258	15	3	3	3	239	25.1	4.64	8.12	3	1.11	0.15	0.0746196	124	111.8	10.63	7.11	111.2	126.3	142.9	119.4	149	121.8	139.2	117.1	111.9	128.8	109.8	107.1	113.6	111.6	126.2	108.9	1
TGGT1_255680	High	IsMasterProtein	TGGT1_255680-t26_1-p1	transcript=TGGT1_255680-t26_1 | gene=TGGT1_255680 | organism=Toxoplasma_gondii_GT1 | gene_product=tRNA_edit domain-containing protein [Source:UniProtKB/TrEMBL;Acc:S7V1Y3] | transcript_product=YbaK/proline-tRNA ligase associated domain-containing protein | location=TGGT1_chrVIIb:4645891-4647883(-) | protein_length=271 | sequence_SO=chromosome | SO=protein_coding_gene | is_pseudo=false	0.001	5.31	7	2	5	2	271	29.1	5.94	11.14	2	1.11	0.15	0.038587	177.4	159.8	9.58	4.32	187.2	169.4	184.3	160.9	216.6	170.4	185.8	170.6	169.3	155.8	159.4	160.2	155.8	152.8	172.1	165.9	1
TGGT1_260680	High	IsMasterProtein	TGGT1_260680-t26_1-p1	transcript=TGGT1_260680-t26_1 | gene=TGGT1_260680 | organism=Toxoplasma_gondii_GT1 | gene_product=DNA primase [Source:UniProtKB/TrEMBL;Acc:S7UYQ5] | transcript_product=putative small subunit DNA primase | location=TGGT1_chrVIIb:2034580-2042093(+) | protein_length=509 | sequence_SO=chromosome | SO=protein_coding_gene | is_pseudo=false	0	9.36	6	3	3	3	509	58	7.53	6.82	3	1.11	0.15	0.00554261	152.8	137.6	5.93	5.36	151.4	161.8	154.2	139.1	164.7	147.2	157.9	142.8	140.8	137.9	136.1	137.4	144.2	124.3	124.3	138	1
TGGT1_262980	High	IsMasterProtein	TGGT1_262980-t26_1-p1	transcript=TGGT1_262980-t26_1 | gene=TGGT1_262980 | organism=Toxoplasma_gondii_GT1 | gene_product=hypothetical protein | transcript_product=hypothetical protein | location=TGGT1_chrVIIb:859839-862624(+) | protein_length=277 | sequence_SO=chromosome | SO=protein_coding_gene | is_pseudo=false	0	26.233	37	7	12	6	277	30.9	4.98	39.9	7	1.11	0.15	0.0150512	344.2	310.1	4.15	6.1	343.8	350.4	352.3	342.8	344.6	310.7	357.9	341.1	293.2	319.7	293.2	340.5	296.9	314.5	305.7	338.5	1
TGGT1_263500	High	IsMasterProtein	TGGT1_263500-t26_1-p1	transcript=TGGT1_263500-t26_1 | gene=TGGT1_263500 | organism=Toxoplasma_gondii_GT1 | gene_product=Putative vacuolar protein sorting-associated protein 26 [Source:UniProtKB/TrEMBL;Acc:S7WDL4] | transcript_product=putative vacuolar protein sorting-associated protein 26 | location=TGGT1_chrVIIb:491007-496795(+) | protein_length=368 | sequence_SO=chromosome | SO=protein_coding_gene | is_pseudo=false	0	18.944	15	6	11	6	368	42.2	6.04	25.41	6	1.11	0.15	0.0239265	991.9	893.2	6.61	5.1	1067	920.4	1024.9	913.1	1039.2	959.8	1072.6	943.5	941.5	869.8	911.5	875.2	944.6	873.6	965.7	833.4	1
TGGT1_269970	Medium	IsMasterProtein	TGGT1_269970-t26_1-p1	transcript=TGGT1_269970-t26_1 | gene=TGGT1_269970 | organism=Toxoplasma_gondii_GT1 | gene_product=hypothetical protein | transcript_product=hypothetical protein | location=TGGT1_chrVIII:5489937-5490308(-) | protein_length=123 | sequence_SO=chromosome | SO=protein_coding_gene | is_pseudo=false	0.016	2.293	7	1	2	1	123	13.1	4.37	3.08	1	1.11	0.15	0.850077	166	149.5	34.38	26.29	148.2	217.6	103.8	230.2	122.2	79.2	190.4	185.8	96.7	193.4	99.9	144.4	187	154.8	123.4	185.7	1
TGGT1_274060	High	IsMasterProtein	TGGT1_274060-t26_1-p1	transcript=TGGT1_274060-t26_1 | gene=TGGT1_274060 | organism=Toxoplasma_gondii_GT1 | gene_product=2-oxoglutarate/malate translocase OMT [Source:UniProtKB/TrEMBL;Acc:S7V4E3] | transcript_product=2-oxoglutarate/malate translocase OMT | location=TGGT1_chrVIII:3043521-3046134(+) | protein_length=323 | sequence_SO=chromosome | SO=protein_coding_gene | is_pseudo=false	0	41.697	33	12	33	12	323	35	9.77	86.43	12	1.11	0.15	1.37484e-06	4102.8	3695.5	1.87	1.58	4097.7	4107.9	4009.2	4114.2	3942.2	4144	4076.1	4182.1	3759.8	3696.9	3710.7	3682.3	3599.3	3694.2	3791.5	3664.5	1	Methylthio [C273]
TGGT1_277990	High	IsMasterProtein	TGGT1_277990-t26_1-p1	transcript=TGGT1_277990-t26_1 | gene=TGGT1_277990 | organism=Toxoplasma_gondii_GT1 | gene_product=OTU domain-containing protein [Source:UniProtKB/TrEMBL;Acc:S7V096] | transcript_product=OTU family cysteine protease | location=TGGT1_chrXII:6282649-6284331(-) | protein_length=506 | sequence_SO=chromosome | SO=protein_coding_gene | is_pseudo=false	0	15.166	9	4	7	4	506	55.5	7.5	18.31	4	1.11	0.15	0.000740337	350.9	316.2	3.99	3.82	361.6	345.3	336.2	357.8	356.6	328.5	369.6	341.7	320.2	331.6	298.7	315.1	294.5	318.9	317.3	311.7	1
TGGT1_286560	High	IsMasterProtein	TGGT1_286560-t26_1-p1	transcript=TGGT1_286560-t26_1 | gene=TGGT1_286560 | organism=Toxoplasma_gondii_GT1 | gene_product=Sm domain-containing protein [Source:UniProtKB/TrEMBL;Acc:A0A125YNH5] | transcript_product=U6 snRNA-associated Sm family protein | location=TGGT1_chrV:1638606-1640043(+) | protein_length=99 | sequence_SO=chromosome | SO=protein_coding_gene | is_pseudo=false	0.001	6.871	32	2	2	2	99	10.9	5.03	8.38	2	1.11	0.15	0.00752599	204.4	184.2	4.08	4.41	207.6	202.8	198.1	208.3	210.8	186.8	206	194.1	185.9	202.3	179	179.1	191.1	188.1	178	182.5	1
TGGT1_297210	High	IsMasterProtein	TGGT1_297210-t26_1-p1	transcript=TGGT1_297210-t26_1 | gene=TGGT1_297210 | organism=Toxoplasma_gondii_GT1 | gene_product=hypothetical protein | transcript_product=hypothetical protein | location=TGGT1_chrII:1581868-1595298(+) | protein_length=3985 | sequence_SO=chromosome | SO=protein_coding_gene | is_pseudo=false	0.003	4.117	1	2	2	2	3985	444.7	6.29	1.64	2	1.11	0.15	0.468881	32.7	29.5	14.44	12.35	26.1	33	32.5	36.3	25	38	31.5	35.5	25.5	35	28.1	28.4	33.6	33.1	25.4	30.6	1
TGGT1_299970	High	IsMasterProtein	TGGT1_299970-t26_1-p1	transcript=TGGT1_299970-t26_1 | gene=TGGT1_299970 | organism=Toxoplasma_gondii_GT1 | gene_product=TPR_REGION domain-containing protein [Source:UniProtKB/TrEMBL;Acc:S7VNZ2] | transcript_product=tetratricopeptide repeat-containing protein | location=TGGT1_chrXII:267184-268375(-) | protein_length=238 | sequence_SO=chromosome | SO=protein_coding_gene | is_pseudo=false	0	8.269	8	2	4	2	238	26.4	5.81	10.4	2	1.11	0.15	0.00670171	304.1	273.9	4.12	6.21	291.9	310.4	317.4	311.6	292.8	319.5	287.7	297.9	258.8	284.5	276.5	290.3	237.7	271.1	271.3	283.4	1
TGGT1_309380	High	IsMasterProtein	TGGT1_309380-t26_1-p1	transcript=TGGT1_309380-t26_1 | gene=TGGT1_309380 | organism=Toxoplasma_gondii_GT1 | gene_product=Nuf2 [Source:UniProtKB/TrEMBL;Acc:S7UT27] | transcript_product=Nuf2 | location=TGGT1_chrXI:612028-618783(-) | protein_length=608 | sequence_SO=chromosome | SO=protein_coding_gene | is_pseudo=false	0	9.609	6	3	3	3	608	69.9	5.64	6.83	3	1.11	0.15	0.156184	105.4	95	11.17	12.07	124.2	116.1	104.3	101.2	128.3	106.6	93.9	100.3	93.6	97.6	95.8	94.2	91.3	82.2	110.1	120.5	1
TGGT1_314910	High	IsMasterProtein	TGGT1_314910-t26_1-p1	transcript=TGGT1_314910-t26_1 | gene=TGGT1_314910 | organism=Toxoplasma_gondii_GT1 | gene_product=CBM20 domain-containing protein [Source:UniProtKB/TrEMBL;Acc:S7W1E0] | transcript_product=starch binding domain-containing protein | location=TGGT1_chrXI:4352229-4354094(-) | protein_length=236 | sequence_SO=chromosome | SO=protein_coding_gene | is_pseudo=false	0	9.012	13	3	5	3	236	27.2	7.83	10.92	3	1.11	0.15	0.00112186	387.7	349.3	3.74	3.56	401.2	387.8	399.3	369.9	371.4	396.7	387.6	364.5	368.5	344.4	357.9	358.7	334.9	333	354.3	344	1
TGGT1_315920	High	IsMasterProtein	TGGT1_315920-t26_1-p1	transcript=TGGT1_315920-t26_1 | gene=TGGT1_315920 | organism=Toxoplasma_gondii_GT1 | gene_product=RNA_pol_L_2 domain-containing protein [Source:UniProtKB/TrEMBL;Acc:S7W157] | transcript_product=DNA-directed RNA polymerase II RPB11A | location=TGGT1_chrXI:5020461-5022963(-) | protein_length=178 | sequence_SO=chromosome | SO=protein_coding_gene | is_pseudo=false	0	9.536	17	3	3	3	178	19.8	8.84	10.37	3	1.11	0.15	0.0146087	586.8	528.6	8.22	5.87	640.9	542.1	616	535.2	629.2	559.1	655	554.5	546.8	471.3	530.7	531.2	526.6	484.8	561.5	506.8	1
TGGT1_209730	High	IsMasterProtein	TGGT1_209730-t26_1-p1	transcript=TGGT1_209730-t26_1 | gene=TGGT1_209730 | organism=Toxoplasma_gondii_GT1 | gene_product=hypothetical protein | transcript_product=hypothetical protein | location=TGGT1_chrIb:1430449-1438561(-) | protein_length=1465 | sequence_SO=chromosome | SO=protein_coding_gene | is_pseudo=false	0.001	5.735	2	2	2	2	1465	159.8	6.13	3.88	2	1.111	0.15	0.167969	24.5	22.1	8.75	14.38	23.1	26.1	27.6	24.5	24.6	23.7	29.2	23.3	17.9	20.9	29.2	23.7	22.1	21.5	24.4	22.1	1
TGGT1_215730	High	IsMasterProtein	TGGT1_215730-t26_1-p1	transcript=TGGT1_215730-t26_1 | gene=TGGT1_215730 | organism=Toxoplasma_gondii_GT1 | gene_product=Putative Gas41 [Source:UniProtKB/TrEMBL;Acc:S7UQU8] | transcript_product=putative Gas41 | location=TGGT1_chrX:7024834-7028755(+) | protein_length=517 | sequence_SO=chromosome | SO=protein_coding_gene | is_pseudo=false	0	9.603	7	4	9	4	517	54.7	6.8	27.25	4	1.111	0.15	0.0157539	435.6	392.1	8.45	5.63	495.6	419.1	475.8	393.9	465.3	438.8	432.4	394.9	406.7	346.1	392.7	391.6	383.9	393.5	411.6	363.7	1
TGGT1_229020	High	IsMasterProtein	TGGT1_229020-t26_1-p1	transcript=TGGT1_229020-t26_1 | gene=TGGT1_229020 | organism=Toxoplasma_gondii_GT1 | gene_product=Protein kinase domain-containing protein [Source:UniProtKB/TrEMBL;Acc:S7V2K0] | transcript_product=putative cell-cycle-associated protein kinase CDK | location=TGGT1_chrVIII:25541-33826(-) | protein_length=1259 | sequence_SO=chromosome | SO=protein_coding_gene | is_pseudo=false	0	29.085	12	11	11	11	1259	137.2	8.25	20.2	11	1.111	0.15	0.0717135	659.7	594	4.15	9.36	675.1	688.3	661	606.2	631.6	665.6	658.3	631	687.1	575	561.9	625.8	501.5	569.5	613.6	627.8	1
TGGT1_240250	High	IsMasterProtein	TGGT1_240250-t26_1-p1	transcript=TGGT1_240250-t26_1 | gene=TGGT1_240250 | organism=Toxoplasma_gondii_GT1 | gene_product=Macro domain-containing protein [Source:UniProtKB/TrEMBL;Acc:S7W065] | transcript_product=macro domain-containing protein | location=TGGT1_chrVI:1105085-1109716(+) | protein_length=817 | sequence_SO=chromosome | SO=protein_coding_gene | is_pseudo=false	0	27.794	10	9	10	9	817	87.9	7.62	30.87	9	1.111	0.15	0.000201661	721.5	649.7	3.94	2.45	728.4	714.6	766.2	705	752.3	694.7	763.9	703.1	654.9	650.7	624.3	658.3	648.6	636.3	635.7	675.4	1
TGGT1_248420	High	IsMasterProtein	TGGT1_248420-t26_1-p1	transcript=TGGT1_248420-t26_1 | gene=TGGT1_248420 | organism=Toxoplasma_gondii_GT1 | gene_product=hypothetical protein | transcript_product=hypothetical protein | location=TGGT1_chrXII:3772416-3776263(-) | protein_length=728 | sequence_SO=chromosome | SO=protein_coding_gene | is_pseudo=false	0	15.069	8	5	6	5	728	79	6.24	17.38	5	1.111	0.15	7.5799e-06	695.3	625.6	1.96	2.57	702.2	696.1	688	700.4	722.8	694.5	691.1	675.2	638.6	640.3	627.3	636.8	600.9	612.5	602	623.9	1
TGGT1_258480	High	IsMasterProtein	TGGT1_258480-t26_1-p1	transcript=TGGT1_258480-t26_1 | gene=TGGT1_258480 | organism=Toxoplasma_gondii_GT1 | gene_product=hypothetical protein | transcript_product=hypothetical protein | location=TGGT1_chrVIIb:3358848-3367769(-) | protein_length=1651 | sequence_SO=chromosome | SO=protein_coding_gene | is_pseudo=false	0	25.895	6	10	10	10	1651	183.8	6.16	23.12	10	1.111	0.15	0.000538396	887.2	798.3	3.01	3.87	918.1	905.7	909.5	852.1	887.3	887	874.9	844.3	738.7	791.1	795.7	826.3	800.9	813.7	777.8	838.5	1
TGGT1_267090	High	IsMasterProtein	TGGT1_267090-t26_1-p1	transcript=TGGT1_267090-t26_1 | gene=TGGT1_267090 | organism=Toxoplasma_gondii_GT1 | gene_product=hypothetical protein | transcript_product=hypothetical protein | location=TGGT1_chrIX:621056-622747(+) | protein_length=563 | sequence_SO=chromosome | SO=protein_coding_gene | is_pseudo=false	0	12.004	11	4	4	4	563	60.2	8.43	8.42	4	1.111	0.15	0.0640546	168.4	151.5	6.5	7.37	175.7	171.6	176.6	152.8	160.5	167.5	169.2	147	138.3	145	149.3	169.8	137.3	160.9	153.8	155.6	1
TGGT1_290890	High	IsMasterProtein	TGGT1_290890-t26_1-p1	transcript=TGGT1_290890-t26_1 | gene=TGGT1_290890 | organism=Toxoplasma_gondii_GT1 | gene_product=Putative carbonyl reductase 1 [Source:UniProtKB/TrEMBL;Acc:S7W4F8] | transcript_product=putative carbonyl reductase 1 | location=TGGT1_chrIX:3727182-3731041(+) | protein_length=411 | sequence_SO=chromosome | SO=protein_coding_gene | is_pseudo=false	0	44.372	27	12	25	12	411	45.2	8.35	78.31	12	1.111	0.15	5.60872e-06	3281.6	2953.4	1.84	2.04	3208.1	3215.9	3163.7	3319.5	3277.3	3285.9	3329.9	3306.5	2965.6	3006.7	3022.3	2929.2	3080.4	2941.2	2916.7	2906.1	1
TGGT1_300270	High	IsMasterProtein	TGGT1_300270-t26_1-p1	transcript=TGGT1_300270-t26_1 | gene=TGGT1_300270 | organism=Toxoplasma_gondii_GT1 | gene_product=hypothetical protein | transcript_product=hypothetical protein | location=TGGT1_chrXII:77129-81016(+) | protein_length=518 | sequence_SO=chromosome | SO=protein_coding_gene | is_pseudo=false	0.001	5.164	4	2	2	2	518	56	8.76	5.38	2	1.111	0.15	0.0259369	115.4	103.8	6.96	6.2	124	111.7	110.3	123.9	102.9	115.8	126.4	115	98.3	102.1	99.1	106.1	105.5	109.8	100	117.6	1
TGGT1_222240	High	IsMasterProtein	TGGT1_222240-t26_1-p1	transcript=TGGT1_222240-t26_1 | gene=TGGT1_222240 | organism=Toxoplasma_gondii_GT1 | gene_product=hypothetical protein | transcript_product=hypothetical protein | location=TGGT1_chrII:970146-973217(+) | protein_length=1023 | sequence_SO=chromosome | SO=protein_coding_gene | is_pseudo=false	0	11.7	5	4	4	4	1023	107.8	5.76	11.23	4	1.112	0.15	0.00220615	281.9	253.5	1.69	5.3	288.2	283	280.7	282.9	280.5	278.9	280.8	293.2	251.5	240.2	255	256.4	228.8	265.1	251.9	271.5	1
TGGT1_249020	Medium	IsMasterProtein	TGGT1_249020-t26_1-p1	transcript=TGGT1_249020-t26_1 | gene=TGGT1_249020 | organism=Toxoplasma_gondii_GT1 | gene_product=Kinesin motor domain-containing protein [Source:UniProtKB/TrEMBL;Acc:S7WGK3] | transcript_product=kinesin motor domain-containing protein | location=TGGT1_chrXII:4238234-4245279(+) | protein_length=1436 | sequence_SO=chromosome | SO=protein_coding_gene | is_pseudo=false	0.013	2.468	1	1	1	1	1436	152.9	9.14	0	1	1.112	0.15	0.0280565	90	81	4.13	9.51	95.1	93.7	86.1	95.6	88.2	89	86.8	91.1	65.3	79.5	86.6	77.2	86.4	75.4	82.5	88.4	1
TGGT1_255310	High	IsMasterProtein	TGGT1_255310-t26_1-p1	transcript=TGGT1_255310-t26_1 | gene=TGGT1_255310 | organism=Toxoplasma_gondii_GT1 | gene_product=Zinc finger (CCCH type) motif-containing protein [Source:UniProtKB/TrEMBL;Acc:S7WI60] | transcript_product=zinc finger (CCCH type) motif-containing protein | location=TGGT1_chrVIIb:4816667-4819300(+) | protein_length=877 | sequence_SO=chromosome | SO=protein_coding_gene | is_pseudo=false	0.003	4.582	2	2	2	2	877	91.5	6.61	2.98	2	1.112	0.15	0.15274	68.4	61.5	10.29	15.03	59.9	71	63.4	57.7	78.5	66.8	72.7	70	67.9	63.6	59.5	52.9	69.4	49.6	46.6	68	1
TGGT1_257070	High	IsMasterProtein	TGGT1_257070-t26_1-p1	transcript=TGGT1_257070-t26_1 | gene=TGGT1_257070 | organism=Toxoplasma_gondii_GT1 | gene_product=hypothetical protein | transcript_product=hypothetical protein | location=TGGT1_chrVIIb:4176004-4180213(-) | protein_length=484 | sequence_SO=chromosome | SO=protein_coding_gene | is_pseudo=false	0	11.562	8	4	4	4	484	49.9	9.79	10.23	4	1.112	0.15	0.0011283	489.4	440	2.82	3.97	471.2	486.7	470.1	499.7	494.3	510.9	492.1	484.4	436.7	470.6	443.3	466.2	457.6	434.9	421.7	430.5	1
TGGT1_273730	High	IsMasterProtein	TGGT1_273730-t26_1-p1	transcript=TGGT1_273730-t26_1 | gene=TGGT1_273730 | organism=Toxoplasma_gondii_GT1 | gene_product=PNPLA domain-containing protein [Source:UniProtKB/TrEMBL;Acc:S7WJV4] | transcript_product=phospholipase, patatin family protein | location=TGGT1_chrVIII:3297858-3301354(-) | protein_length=656 | sequence_SO=chromosome | SO=protein_coding_gene | is_pseudo=false	0	10.372	6	3	6	3	656	72	8.9	15.38	3	1.112	0.15	0.0120439	198.9	178.8	3.01	8.8	200.5	206.7	204.9	197.4	195.3	190.6	205.2	193.5	170.3	182.5	181.9	179.4	136.9	169.6	178.2	180.1	1
TGGT1_280760	Medium	IsMasterProtein	TGGT1_280760-t26_1-p1	transcript=TGGT1_280760-t26_1 | gene=TGGT1_280760 | organism=Toxoplasma_gondii_GT1 | gene_product=UBIQUITIN_CONJUGAT_2 domain-containing protein [Source:UniProtKB/TrEMBL;Acc:A0A125YLJ8] | transcript_product=RUB1 conjugating enzyme | location=TGGT1_chrVIIa:96844-98574(-) | protein_length=222 | sequence_SO=chromosome | SO=protein_coding_gene | is_pseudo=false	0.01	2.726	4	1	1	1	222	24.2	7.93	2.72	1	1.112	0.15	0.170237	126.1	113.4	11.11	8.15	135.3	114.4	140.4	109.7	143.9	117.5	140.6	115.6	132.7	113	110	121.3	111.9	101.6	113.8	122.6	1
TGGT1_202750	Medium	IsMasterProtein	TGGT1_202750-t26_1-p1	transcript=TGGT1_202750-t26_1 | gene=TGGT1_202750 | organism=Toxoplasma_gondii_GT1 | gene_product=3' exoribonuclease family, domain 1 domain-containing protein [Source:UniProtKB/TrEMBL;Acc:S7WAK7] | transcript_product=3' exoribonuclease family, domain 1 domain-containing protein | location=TGGT1_chrVIIa:2955721-2960686(+) | protein_length=344 | sequence_SO=chromosome | SO=protein_coding_gene | is…	0.023	1.839	2	1	1	1	344	35.8	4.93	0	1	1.113	0.15	0.200751	46.7	41.9	10.6	11.25	55.5	50.3	52.8	45.4	41.6	48	42.4	43.9	53.6	41.1	42.7	44.7	45.9	41.2	38.7	38.8	1
TGGT1_227610	High	IsMasterProtein	TGGT1_227610-t26_1-p1	transcript=TGGT1_227610-t26_1 | gene=TGGT1_227610 | organism=Toxoplasma_gondii_GT1 | gene_product=hypothetical protein | transcript_product=hypothetical protein | location=TGGT1_chrX:785051-801902(+) | protein_length=3648 | sequence_SO=chromosome | SO=protein_coding_gene | is_pseudo=false	0	32.546	3	11	17	11	3648	389.9	6.42	27.38	11	1.113	0.15	0.011481	619.9	557.2	5.04	6.22	654.7	665.4	618.2	621.5	609.3	646.7	571.5	597.2	533.3	507.7	543.6	549.6	564.8	580.8	603	609.4	1
TGGT1_248950	High	IsMasterProtein	TGGT1_248950-t26_1-p1	transcript=TGGT1_248950-t26_1 | gene=TGGT1_248950 | organism=Toxoplasma_gondii_GT1 | gene_product=Carrier superfamily protein [Source:UniProtKB/TrEMBL;Acc:S7V0G4] | transcript_product=carrier superfamily protein | location=TGGT1_chrXII:4199476-4202805(-) | protein_length=593 | sequence_SO=chromosome | SO=protein_coding_gene | is_pseudo=false	0.003	4.021	4	1	1	1	593	63	9.91	4.54	1	1.113	0.15	0.128847	70.7	63.5	10.14	7.82	80.7	65.5	73.9	79.3	75.2	67.6	64.2	61.7	60.4	58.4	66.9	72.4	62	60.7	70.4	65.1	1
TGGT1_257080	High	IsMasterProtein	TGGT1_257080-t26_1-p1	transcript=TGGT1_257080-t26_1 | gene=TGGT1_257080 | organism=Toxoplasma_gondii_GT1 | gene_product=Phosphodiesterase [Source:UniProtKB/TrEMBL;Acc:S7UZ69] | transcript_product=3'5'-cyclic nucleotide phosphodiesterase domain-containing protein | location=TGGT1_chrVIIb:4162664-4173163(+) | protein_length=1656 | sequence_SO=chromosome | SO=protein_coding_gene | is_pseudo=false	0.003	4.707	2	3	4	3	1656	180.3	7.34	0	3	1.113	0.15	0.0569044	82.6	74.2	13.44	5.4	97.8	73.4	85.4	78.2	101.5	74.6	99.2	79.8	66.2	73.3	76.7	73.5	74.2	74.2	76.9	80	1
TGGT1_278470	High	IsMasterProtein	TGGT1_278470-t26_1-p1	transcript=TGGT1_278470-t26_1 | gene=TGGT1_278470 | organism=Toxoplasma_gondii_GT1 | gene_product=hypothetical protein | transcript_product=hypothetical protein | location=TGGT1_chrXII:5995192-6000206(+) | protein_length=592 | sequence_SO=chromosome | SO=protein_coding_gene | is_pseudo=false	0	13.205	10	4	5	4	592	66.6	5.6	16.4	4	1.113	0.15	0.0383025	181.2	162.8	4.67	6.11	189.6	162.9	185.3	184.9	176.5	173.8	180	182.4	164.2	161.5	169.9	186.9	171.3	159.5	161.4	153.7	1
TGGT1_311500	High	IsMasterProtein	TGGT1_311500-t26_1-p1	transcript=TGGT1_311500-t26_1 | gene=TGGT1_311500 | organism=Toxoplasma_gondii_GT1 | gene_product=ThiF family protein [Source:UniProtKB/TrEMBL;Acc:S7W1Y2] | transcript_product=ThiF family protein | location=TGGT1_chrXI:2094508-2100197(-) | protein_length=845 | sequence_SO=chromosome | SO=protein_coding_gene | is_pseudo=false	0	36.359	19	11	15	11	845	93.2	5.11	28.36	11	1.113	0.15	0.00167556	517.3	464.7	4.24	3.95	506.8	532.3	502.6	519.5	515.1	553.7	479	520.7	468.3	461.1	490.6	490	439.1	451.2	475.6	454.5	1
TGGT1_312600	High	IsMasterProtein	TGGT1_312600-t26_1-p1	transcript=TGGT1_312600-t26_1 | gene=TGGT1_312600 | organism=Toxoplasma_gondii_GT1 | gene_product=SHSP domain-containing protein [Source:UniProtKB/TrEMBL;Acc:S7UTP6] | transcript_product=heat shock protein HSP21 | location=TGGT1_chrXI:2781847-2783667(+) | protein_length=195 | sequence_SO=chromosome | SO=protein_coding_gene | is_pseudo=false	0	39.59	52	9	27	9	195	21.3	6.61	98.68	9	1.113	0.15	1.6063e-06	2675.3	2403.2	1.46	2.15	2722.3	2688.8	2666.8	2651.1	2616.8	2689.1	2607.6	2683.8	2394.4	2403.3	2404.7	2417.7	2288.1	2311.5	2403	2422.8	1
TGGT1_315250	High	IsMasterProtein	TGGT1_315250-t26_1-p1	transcript=TGGT1_315250-t26_1 | gene=TGGT1_315250 | organism=Toxoplasma_gondii_GT1 | gene_product=Putative GAMM1 protein [Source:UniProtKB/TrEMBL;Acc:S7UMB6] | transcript_product=putative GAMM1 protein | location=TGGT1_chrXI:4546867-4550890(-) | protein_length=603 | sequence_SO=chromosome | SO=protein_coding_gene | is_pseudo=false	0	22.197	14	6	11	6	603	67.2	8.54	25.86	6	1.113	0.15	0.0137704	914	821.5	7.45	2.23	978.5	841.5	981.6	861	936.7	844.9	1016.3	891.9	788.9	841.5	824	819	824.6	815	844.1	803.4	1
TGGT1_232210	High	IsMasterProtein	TGGT1_232210-t26_1-p1	transcript=TGGT1_232210-t26_1 | gene=TGGT1_232210 | organism=Toxoplasma_gondii_GT1 | gene_product=hypothetical protein | transcript_product=hypothetical protein | location=TGGT1_chrVIII:1948451-1952133(-) | protein_length=320 | sequence_SO=chromosome | SO=protein_coding_gene | is_pseudo=false	0.001	5.301	8	2	2	2	320	33.9	4.84	3.22	2	1.098	0.14	0.166904	122.5	111.5	8.18	7.9	124.2	121.2	136.4	118.5	136.3	123.8	106.2	116.3	130.5	114.9	105.5	111.7	104.9	109.2	111.4	124.2	1
TGGT1_250010	High	IsMasterProtein	TGGT1_250010-t26_1-p1	transcript=TGGT1_250010-t26_1 | gene=TGGT1_250010 | organism=Toxoplasma_gondii_GT1 | gene_product=SUN domain-containing protein [Source:UniProtKB/TrEMBL;Acc:S7W8Z6] | transcript_product=Sad1 / UNC family protein | location=TGGT1_chrXII:4916824-4925608(-) | protein_length=796 | sequence_SO=chromosome | SO=protein_coding_gene | is_pseudo=false	0.001	5.684	3	2	2	2	796	87.9	6.44	4.92	2	1.098	0.14	0.186653	51.7	47	7.41	11.56	47.8	52.3	44.3	54.2	51.1	56	50.3	54.1	46.7	51.8	40.7	48.5	41.3	43.7	56.9	47.4	1
TGGT1_262990	High	IsMasterProtein	TGGT1_262990-t26_1-p1	transcript=TGGT1_262990-t26_1 | gene=TGGT1_262990 | organism=Toxoplasma_gondii_GT1 | gene_product=hypothetical protein | transcript_product=hypothetical protein | location=TGGT1_chrVIIb:851355-857400(-) | protein_length=1634 | sequence_SO=chromosome | SO=protein_coding_gene | is_pseudo=false	0.003	4.762	1	2	2	2	1634	176.1	6.65	1.88	2	1.098	0.14	0.268555	82.5	75.1	10.9	9.63	68.2	82.4	79.5	90.6	82.7	93.5	70.6	86.8	72.5	74.7	78.7	75.3	60.6	75	84.7	81.8	1
TGGT1_270900	High	IsMasterProtein	TGGT1_270900-t26_1-p1	transcript=TGGT1_270900-t26_1 | gene=TGGT1_270900 | organism=Toxoplasma_gondii_GT1 | gene_product=AAA domain-containing protein [Source:UniProtKB/TrEMBL;Acc:S7V541] | transcript_product=ATPase, AAA family protein | location=TGGT1_chrVIII:4886367-4897127(+) | protein_length=1600 | sequence_SO=chromosome | SO=protein_coding_gene | is_pseudo=false	0.007	2.993	1	2	2	1	1600	173.1	7.84	3.69	2	1.098	0.14	0.0621998	63.2	57.6	8.57	8.6	58.7	57.9	70.7	65.2	70.5	61.4	69.7	59.6	67.1	56.9	50.6	57.3	52.5	58.8	59.9	57.8	1
TGGT1_278630	High	IsMasterProtein	TGGT1_278630-t26_1-p1	transcript=TGGT1_278630-t26_1 | gene=TGGT1_278630 | organism=Toxoplasma_gondii_GT1 | gene_product=TPR_REGION domain-containing protein [Source:UniProtKB/TrEMBL;Acc:S7W8C6] | transcript_product=tetratricopeptide repeat-containing protein | location=TGGT1_chrXII:5897842-5906286(-) | protein_length=981 | sequence_SO=chromosome | SO=protein_coding_gene | is_pseudo=false	0	20.392	8	6	6	6	981	106.2	5.47	18.12	6	1.098	0.14	0.0612918	219.6	199.9	7.28	6.69	219.4	233.1	248.7	199.1	201.2	218.3	221	219.7	210.3	199.4	176.4	194.9	200.5	197.8	223.1	207	1
TGGT1_280800	High	IsMasterProtein	TGGT1_280800-t26_1-p1	transcript=TGGT1_280800-t26_1 | gene=TGGT1_280800 | organism=Toxoplasma_gondii_GT1 | gene_product=SWI2/SNF2 SRCAP/Ino80 [Source:UniProtKB/TrEMBL;Acc:S7W9I8] | transcript_product=SWI2/SNF2 SRCAP/Ino80 | location=TGGT1_chrVIIa:44179-60341(-) | protein_length=2894 | sequence_SO=chromosome | SO=protein_coding_gene | is_pseudo=false	0	30.395	5	11	14	11	2894	316.8	5.2	22.4	11	1.098	0.14	0.058443	540.6	492.3	6.38	2.84	513.3	543.3	538	566.7	471.2	545.4	482.2	543.5	507.7	501.9	498.6	497.3	477.9	479.8	467.2	487.3	1
[truncated: 3,896 more rows]

## Sheet: 3.2_SPARK_depletion_proteome
Protein_ID	Protein.FDR.Confidence.Combined	Master	Accession	Description	Exp.q.value.Combined	Sum.PEP.Score	Coverage.in.Percent	Number.of.Peptides	Number.of.PSMs	Number.of.Unique.Peptides	Number.of.AAs	MW.in.kDa	calc.pI	Score.Sequest.HT.Sequest.HT	Number.of.Peptides.by.Search.Engine.Sequest.HT	Abundance.Ratio.SPARK.IAA.3..SPARK.IAA.0	Abundance.Ratio.SPARK.IAA.8..SPARK.IAA.0	Abundance.Ratio.SPARK.IAA.24..SPARK.IAA.0	Abundance.Ratio.SPARK.IAA.0..TIR1.IAA.24	Abundance.Ratio.SPARK.IAA.3..TIR1.IAA.24	Abundance.Ratio.SPARK.IAA.8..TIR1.IAA.24	Abundance.Ratio.SPARK.IAA.24..TIR1.IAA.24	is.NA.in.all	Abundance.Ratio.log2.SPARK.IAA.3..SPARK.IAA.0	Abundance.Ratio.log2.SPARK.IAA.8..SPARK.IAA.0	Abundance.Ratio.log2.SPARK.IAA.24..SPARK.IAA.0	Abundance.Ratio.log2.SPARK.IAA.0..TIR1.IAA.24	Abundance.Ratio.log2.SPARK.IAA.3..TIR1.IAA.24	Abundance.Ratio.log2.SPARK.IAA.8..TIR1.IAA.24	Abundance.Ratio.log2.SPARK.IAA.24..TIR1.IAA.24	Abundance.Ratio.Adj.P.Value.SPARK.IAA.3..SPARK.IAA.0	Abundance.Ratio.Adj.P.Value.SPARK.IAA.8..SPARK.IAA.0	Abundance.Ratio.Adj.P.Value.SPARK.IAA.24..SPARK.IAA.0	Abundance.Ratio.Adj.P.Value.SPARK.IAA.0..TIR1.IAA.24	Abundance.Ratio.Adj.P.Value.SPARK.IAA.3..TIR1.IAA.24	Abundance.Ratio.Adj.P.Value.SPARK.IAA.8..TIR1.IAA.24	Abundance.Ratio.Adj.P.Value.SPARK.IAA.24..TIR1.IAA.24	Abundances.Grouped.SPARK.IAA.0	Abundances.Grouped.SPARK.IAA.3	Abundances.Grouped.SPARK.IAA.8	Abundances.Grouped.SPARK.IAA.24	Abundances.Grouped.TIR1.IAA.24	Abundances.Grouped.CV.in.Percent.SPARK.IAA.0	Abundances.Grouped.CV.in.Percent.SPARK.IAA.3	Abundances.Grouped.CV.in.Percent.SPARK.IAA.8	Abundances.Grouped.CV.in.Percent.SPARK.IAA.24	Abundances.Grouped.CV.in.Percent.TIR1.IAA.24	Abundances.Normalized.F1.127C.Sample.SPARK.IAA.0.R1	Abundances.Normalized.F1.128N.Sample.SPARK.IAA.0.R2
[truncated: 4,091 more rows]
[truncated: 20 more columns]

[truncated: 4 more sheets: 3.3_SPARK_depletion_phospho, 3.4_SPARKEL_depletion_proteome, 3.5_PKA_C3_depletion_proteome, 3.6_PKA_C3_depletion_phospho]
