# Supplementary material for: SPARK regulates AGC kinases central to the Toxoplasma gondii asexual cycle
Source: bioRxiv preprint, doi:10.1101/2023.10.30.564746, version 2 (2024-05-02)
Supplement: Supplementary File 4 [file 564746_file06.xlsx]

## Sheet: 4.1_PKG_phospho
Peptide_ID	Protein_ID	Description	Annotation	Sequence	Peptide_Modifications	Protein_Modifications	PSMs	Confidence	Qvality.PEP	Qvality.q.value	Number.of.Protein.Groups	Number.of.Proteins	Master.Protein.Accessions	Positions.in.Master.Proteins	Number.of.Missed.Cleavages	Theo.MHplus.in.Da	Abundance.Ratio.IAA.0.PKGAID..PBS.0.PKGAID	Abundance.Ratio.log2.IAA.0.PKGAID..PBS.0.PKGAID	Abundance.Ratio.Adj.P.Value.IAA.0.PKGAID..PBS.0.PKGAID	Abundances.Grouped.IAA.0.PKGAID	Abundances.Grouped.PBS.0.PKGAID	Abundances.Grouped.CV.in.Percent.IAA.0.PKGAID	Abundances.Grouped.CV.in.Percent.PBS.0.PKGAID	Abundances.Normalized.F3.129C.Sample.IAA.0.PKGAID.R1	Abundances.Normalized.F3.130N.Sample.IAA.0.PKGAID.R2	Abundances.Normalized.F4.129C.Sample.IAA.0.PKGAID.R1	Abundances.Normalized.F4.130N.Sample.IAA.0.PKGAID.R2	Abundances.Normalized.F3.131C.Sample.PBS.0.PKGAID.R1	Abundances.Normalized.F3.132N.Sample.PBS.0.PKGAID.R2	Abundances.Normalized.F4.131C.Sample.PBS.0.PKGAID.R1	Abundances.Normalized.F4.132N.Sample.PBS.0.PKGAID.R2	Quan.Info	Confidence.by.Search.Engine.Sequest.HT	Percolator.q.Value.by.Search.Engine.Sequest.HT	Percolator.PEP.by.Search.Engine.Sequest.HT	XCorr.by.Search.Engine.Sequest.HT
1	TGGT1_228360	putative peptidyl-prolyl isomerase FKBP12	transcript=TGGT1_228360-t26_1 | gene=TGGT1_228360 | organism=Toxoplasma_gondii_GT1 | gene_product=Peptidylprolyl isomerase [Source:UniProtKB/TrEMBL;Acc:S7UXV4] | transcript_product=putative peptidyl-prolyl isomerase FKBP12 | location=TGGT1_chrX:286110-288045(+) | protein_length=362 | sequence_SO=chromosome | SO=protein_coding_gene | is_pseudo=false	[R].AAAAAAAGVCGEEASETESPR.[K]	1xMethylthio [C10]; 1xTMTpro [N-Term]; 1xPhospho [S15(100)]	TGGT1_228360-t26_1-p1 1xMethylthio [C18]; 1xPhospho [S23(100)]	5	High	5.67096e-07	9.56086e-05	1	1	TGGT1_228360-t26_1-p1	TGGT1_228360-t26_1-p1 [9-29]	0	2378.03	1.082	0.11	1	58.7	54.3	67.34	72.64	23.5	35.9	119.3	96	22.2	29.4	119.7	100.2		High	7.761e-05	2.787e-07	5.68
78059	TGGT1_311100	zinc finger (CCCH type) motif-containing protein	transcript=TGGT1_311100-t26_1 | gene=TGGT1_311100 | organism=Toxoplasma_gondii_GT1 | gene_product=Zinc finger (CCCH type) motif-containing protein [Source:UniProtKB/TrEMBL;Acc:S7UU40] | transcript_product=zinc finger (CCCH type) motif-containing protein | location=TGGT1_chrXI:1771325-1774934(+) | protein_length=919 | sequence_SO=chromosome | SO=protein_coding_gene | is_pseudo=false	[R].RLSCSELGGGSQSLPASPK.[E]	1xMethylthio [C4]; 1xTMTpro [K19]; 1xTMTpro [N-Term]; 1xPhospho [S]	TGGT1_311100-t26_1-p1 1xMethylthio [C307]	1	High	0.000142021	9.56086e-05	1	1	TGGT1_311100-t26_1-p1	TGGT1_311100-t26_1-p1 [304-322]	1	2608.31	1.168	0.22	1	56.8	48.6	4.48	3.14	NA	NA	55	58.6	NA	NA	47.5	49.7		High	7.761e-05	8.109e-05	2.79
26591	TGGT1_233735	hypothetical protein	transcript=TGGT1_233735-t26_1 | gene=TGGT1_233735 | organism=Toxoplasma_gondii_GT1 | gene_product=hypothetical protein | transcript_product=hypothetical protein | location=TGGT1_chrVIII:2750450-2763257(+) | protein_length=2490 | sequence_SO=chromosome | SO=protein_coding_gene | is_pseudo=false	[K].ENANEDEETEEEEEEDHLQLPR.[W]	1xTMTpro [N-Term]; 1xPhospho [T9(100)]	TGGT1_233735-t26_1-p1 1xPhospho [T1897(100)]	1	High	2.74985e-09	9.56086e-05	1	1	TGGT1_233735-t26_1-p1	TGGT1_233735-t26_1-p1 [1889-1910]	0	3068.28	1.092	0.13	1	12.3	11.3	27.83	1.97	NA	NA	10.1	15	NA	NA	11.1	11.4		High	7.761e-05	6.415e-10	7.09
26590	TGGT1_205120	hypothetical protein	transcript=TGGT1_205120-t26_1 | gene=TGGT1_205120 | organism=Toxoplasma_gondii_GT1 | gene_product=hypothetical protein | transcript_product=hypothetical protein | location=TGGT1_chrVIIa:1534318-1540330(-) | protein_length=1495 | sequence_SO=chromosome | SO=protein_coding_gene | is_pseudo=false	[K].ENAHSEVENVAEIER.[G]	1xTMTpro [N-Term]; 1xPhospho [S5(100)]	TGGT1_205120-t26_1-p1 1xPhospho [S828(100)]	5	High	8.17486e-07	9.56086e-05	1	1	TGGT1_205120-t26_1-p1	TGGT1_205120-t26_1-p1 [824-838]	0	2109.98	1.282	0.36	1	22.2	17.3	1.38	22.6	NA	NA	22.4	22	NA	NA	14.8	20.4		High	7.761e-05	2.981e-07	4.94
26588	TGGT1_288350	hypothetical protein	transcript=TGGT1_288350-t26_1 | gene=TGGT1_288350 | organism=Toxoplasma_gondii_GT1 | gene_product=Nkap_C domain-containing protein [Source:UniProtKB/TrEMBL;Acc:S7UPG1] | transcript_product=hypothetical protein | location=TGGT1_chrIX:2274573-2280483(-) | protein_length=1053 | sequence_SO=chromosome | SO=protein_coding_gene | is_pseudo=false	[R].ENAGGEQGKDSEEER.[T]	1xTMTpro [K9]; 1xTMTpro [N-Term]; 1xPhospho [S11(100)]	TGGT1_288350-t26_1-p1 1xPhospho [S591(100)]	8	High	5.36887e-06	9.56086e-05	1	1	TGGT1_288350-t26_1-p1	TGGT1_288350-t26_1-p1 [581-595]	1	2323.07	1.139	0.19	1	218.9	192.1	2.33	6.85	216.4	221.3	212.7	224.2	171	194.3	201.3	190		High	0.0001044	3.302e-06	4.24
78056	TGGT1_309380	Nuf2	transcript=TGGT1_309380-t26_1 | gene=TGGT1_309380 | organism=Toxoplasma_gondii_GT1 | gene_product=Nuf2 [Source:UniProtKB/TrEMBL;Acc:S7UT27] | transcript_product=Nuf2 | location=TGGT1_chrXI:612028-618783(-) | protein_length=608 | sequence_SO=chromosome | SO=protein_coding_gene | is_pseudo=false	[K].RLSCLDEETEEEAR.[M]	1xMethylthio [C4]; 1xTMTpro [N-Term]; 1xPhospho [S3(100)]	TGGT1_309380-t26_1-p1 1xMethylthio [C567]; 1xPhospho [S566(100)]	5	High	9.34911e-06	9.56086e-05	1	1	TGGT1_309380-t26_1-p1	TGGT1_309380-t26_1-p1 [564-577]	1	2109.92	1.057	0.08	1	126	119.2	16.15	8.24	117.9	136.6	94.4	134.6	133.8	118.7	119.7	109.8		High	7.761e-05	5.154e-06	4.79
26580	TGGT1_237890	calcium-dependent protein kinase CDPK4	transcript=TGGT1_237890-t26_1 | gene=TGGT1_237890 | organism=Toxoplasma_gondii_GT1 | gene_product=Calcium-dependent protein kinase CDPK4 [Source:UniProtKB/TrEMBL;Acc:S7UGB4] | transcript_product=calcium-dependent protein kinase CDPK4 | location=TGGT1_chrIV:2483651-2496063(+) | protein_length=1158 | sequence_SO=chromosome | SO=protein_coding_gene | is_pseudo=false	[R].ENAEPQASPLEPGGDTTPGR.[T]	1xTMTpro [N-Term]; 1xPhospho [T17(99.7)]	TGGT1_237890-t26_1-p1 1xPhospho [T108(99.7)]	6	High	2.04095e-06	9.56086e-05	1	1	TGGT1_237890-t26_1-p1	TGGT1_237890-t26_1-p1 [92-111]	0	2407.11	1.057	0.08	1	57.6	54.6	6.69	18.29	NA	NA	55	60.4	NA	NA	62.1	47.9		High	7.761e-05	7.994e-07	4.32
26572	TGGT1_208750	RWD domain-containing protein	transcript=TGGT1_208750-t26_1 | gene=TGGT1_208750 | organism=Toxoplasma_gondii_GT1 | gene_product=RWD domain-containing protein [Source:UniProtKB/TrEMBL;Acc:S7UJH2] | transcript_product=RWD domain-containing protein | location=TGGT1_chrIb:861884-864672(+) | protein_length=268 | sequence_SO=chromosome | SO=protein_coding_gene | is_pseudo=false	[R].ENAAVVEDESDEEEEEGDGDEPQYTGLGDK.[Q]	1xTMTpro [K30]; 1xTMTpro [N-Term]; 1xPhospho [S10(100)]	TGGT1_208750-t26_1-p1 1xPhospho [S139(100)]	5	High	3.43655e-08	9.56086e-05	1	1	TGGT1_208750-t26_1-p1	TGGT1_208750-t26_1-p1 [130-159]	0	3943.69	1.154	0.21	1	129.1	111.9	83.44	85.52	320	323.2	52.1	51.4	271.1	305.9	46.2	41.2		High	0.0001044	2.431e-08	7
78047	TGGT1_269180	MIF4G domain-containing protein	transcript=TGGT1_269180-t26_1 | gene=TGGT1_269180 | organism=Toxoplasma_gondii_GT1 | gene_product=MIF4G domain-containing protein [Source:UniProtKB/TrEMBL;Acc:S7WKZ1] | transcript_product=MIF4G domain-containing protein | location=TGGT1_chrVIII:6008955-6021323(-) | protein_length=2668 | sequence_SO=chromosome | SO=protein_coding_gene | is_pseudo=false	[R].RLSASQVQK.[D]	1xTMTpro [K9]; 1xTMTpro [N-Term]; 1xPhospho [S3(100)]	TGGT1_269180-t26_1-p1 1xPhospho [S1712(100)]	5	High	0.000114695	9.56086e-05	1	1	TGGT1_269180-t26_1-p1	TGGT1_269180-t26_1-p1 [1710-1718]	1	1704.97	2.421	1.28	0.00328241	882	364.3	7.28	19.22	837.6	928.6	NA	NA	317.7	417.7	NA	NA		High	0.0001044	6.775e-05	3.21
26554	TGGT1_228150	hypothetical protein	transcript=TGGT1_228150-t26_1 | gene=TGGT1_228150 | organism=Toxoplasma_gondii_GT1 | gene_product=hypothetical protein | transcript_product=hypothetical protein | location=TGGT1_chrX:450432-458115(+) | protein_length=2115 | sequence_SO=chromosome | SO=protein_coding_gene | is_pseudo=false	[K].EMVPPGLRTPPSFEDGNAVSNSSR.[T]	1xTMTpro [N-Term]; 1xPhospho [T9(100)]	TGGT1_228150-t26_1-p1 1xPhospho [T235(100)]	4	High	1.0186e-05	9.56086e-05	1	1	TGGT1_228150-t26_1-p1	TGGT1_228150-t26_1-p1 [227-250]	1	2928.39	1.246	0.32	1	172.3	138.3	52.61	53.5	283.3	262.8	112.9	93	203.7	251.9	79.2	93.9		High	7.761e-05	6.107e-06	3.29
95069	TGGT1_229380	hypothetical protein	transcript=TGGT1_229380-t26_1 | gene=TGGT1_229380 | organism=Toxoplasma_gondii_GT1 | gene_product=LRAT domain-containing protein [Source:UniProtKB/TrEMBL;Acc:S7WBL2] | transcript_product=hypothetical protein | location=TGGT1_chrVIII:216517-221261(+) | protein_length=1001 | sequence_SO=chromosome | SO=protein_coding_gene | is_pseudo=false	[R].SSDDVAAPFAASQTDSGQR.[D]	1xTMTpro [N-Term]; 1xPhospho [S/T]		2	High	1.58604e-05	9.56086e-05	1	1	TGGT1_229380-t26_1-p1	TGGT1_229380-t26_1-p1 [35-53]	0	2294.03	0.919	-0.12	1	36.1	39.2	11.93	11.31	33.1	39.3	NA	NA	36.2	42.5	NA	NA		High	7.761e-05	7.313e-06	3.9
54488	TGGT1_265770	hypothetical protein	transcript=TGGT1_265770-t26_1 | gene=TGGT1_265770 | organism=Toxoplasma_gondii_GT1 | gene_product=hypothetical protein | transcript_product=hypothetical protein | location=TGGT1_chrIX:1290712-1302315(-) | protein_length=2098 | sequence_SO=chromosome | SO=protein_coding_gene | is_pseudo=false	[R].LEASAQSQEGNTER.[L]	1xTMTpro [N-Term]; 1xPhospho [S7(100)]	TGGT1_265770-t26_1-p1 1xPhospho [S1106(100)]	4	High	1.79101e-05	9.56086e-05	1	1	TGGT1_265770-t26_1-p1	TGGT1_265770-t26_1-p1 [1100-1113]	0	1903.87	0.985	-0.02	1	34.6	35.1	4.39	8.13	NA	NA	33.5	35.7	NA	NA	33.1	37.2		High	7.761e-05	8.34e-06	4.35
26507	TGGT1_287170	hypothetical protein	transcript=TGGT1_287170-t26_1 | gene=TGGT1_287170 | organism=Toxoplasma_gondii_GT1 | gene_product=hypothetical protein | transcript_product=hypothetical protein | location=TGGT1_chrV:1407962-1410454(-) | protein_length=363 | sequence_SO=chromosome | SO=protein_coding_gene | is_pseudo=false	[R].EMSPVPAIPSGGSPSR.[T]	1xTMTpro [N-Term]; 1xPhospho [S13(99.6)]	TGGT1_287170-t26_1-p1 1xPhospho [S227(99.6)]	5	High	3.34095e-06	9.56086e-05	1	1	TGGT1_287170-t26_1-p1	TGGT1_287170-t26_1-p1 [215-230]	0	1952.95	1.085	0.12	1	73.3	67.6	94.76	94.23	24.4	19.6	220	225.9	20.4	22	211	207.5		High	7.761e-05	1.36e-06	4.86
26506	TGGT1_271990	hypothetical protein	transcript=TGGT1_271990-t26_1 | gene=TGGT1_271990 | organism=Toxoplasma_gondii_GT1 | gene_product=hypothetical protein | transcript_product=hypothetical protein | location=TGGT1_chrVIII:4235238-4242838(-) | protein_length=1512 | sequence_SO=chromosome | SO=protein_coding_gene | is_pseudo=false	[R].EMSNLGHEGASR.[S]	1xOxidation [M2]; 1xTMTpro [N-Term]; 1xPhospho [S3(100)]	TGGT1_271990-t26_1-p1 1xPhospho [S773(100)]	10	High	5.92063e-05	9.56086e-05	1	1	TGGT1_271990-t26_1-p1	TGGT1_271990-t26_1-p1 [771-782]	0	1687.74	0.947	-0.08	1	43.5	46	1.13	0.45	NA	NA	43.2	43.9	NA	NA	45.8	46.1		High	7.761e-05	3.063e-05	3.37
26505	TGGT1_271990	hypothetical protein	transcript=TGGT1_271990-t26_1 | gene=TGGT1_271990 | organism=Toxoplasma_gondii_GT1 | gene_product=hypothetical protein | transcript_product=hypothetical protein | location=TGGT1_chrVIII:4235238-4242838(-) | protein_length=1512 | sequence_SO=chromosome | SO=protein_coding_gene | is_pseudo=false	[R].EMSNLGHEGASR.[S]	1xTMTpro [N-Term]; 1xPhospho [S3(100)]	TGGT1_271990-t26_1-p1 1xPhospho [S773(100)]	5	High	5.5463e-05	9.56086e-05	1	1	TGGT1_271990-t26_1-p1	TGGT1_271990-t26_1-p1 [771-782]	0	1671.75	0.921	-0.12	1	32.6	35.4	8.77	6.07	33.5	31	37.5	31.6	32.1	36.9	34.5	36.2		High	0.0001044	3.247e-05	3.66
95098	TGGT1_253560	hypothetical protein	transcript=TGGT1_253560-t26_1 | gene=TGGT1_253560 | organism=Toxoplasma_gondii_GT1 | gene_product=hypothetical protein | transcript_product=hypothetical protein | location=TGGT1_chrIII:1008714-1014747(-) | protein_length=1904 | sequence_SO=chromosome | SO=protein_coding_gene | is_pseudo=false	[R].SSDLFSFGEASDGEASSER.[L]	1xTMTpro [N-Term]; 2xPhospho [S6(100); S11(100)]	TGGT1_253560-t26_1-p1 2xPhospho [S858(100); S863(100)]	1	High	0.000111649	9.56086e-05	1	1	TGGT1_253560-t26_1-p1	TGGT1_253560-t26_1-p1 [853-871]	0	2441.97	1	0	1	21.1	21.1	9.13	9.38	19.7	22.5	NA	NA	19.7	22.5	NA	NA		High	0.0001044	6.594e-05	2.98
26491	TGGT1_236560	hypothetical protein	transcript=TGGT1_236560-t26_1 | gene=TGGT1_236560 | organism=Toxoplasma_gondii_GT1 | gene_product=hypothetical protein | transcript_product=hypothetical protein | location=TGGT1_chrX:5312225-5319664(+) | protein_length=2479 | sequence_SO=chromosome | SO=protein_coding_gene | is_pseudo=false	[R].EMSGEAGSTLEIR.[K]	1xTMTpro [N-Term]; 1xPhospho [S3(100)]	TGGT1_236560-t26_1-p1 1xPhospho [S693(100)]	4	High	7.9983e-05	9.56086e-05	1	1	TGGT1_236560-t26_1-p1	TGGT1_236560-t26_1-p1 [691-703]	0	1763.82	0.786	-0.35	1	45.6	58.1	12.03	25.32	44.4	52.6	39.3	46.8	84.9	65.4	50.7	51.6		High	7.761e-05	4.263e-05	4.13
26463	TGGT1_248840	transporter, major facilitator family protein	transcript=TGGT1_248840-t26_1 | gene=TGGT1_248840 | organism=Toxoplasma_gondii_GT1 | gene_product=MFS domain-containing protein [Source:UniProtKB/TrEMBL;Acc:S7WGI7] | transcript_product=transporter, major facilitator family protein | location=TGGT1_chrXII:4148856-4152686(-) | protein_length=757 | sequence_SO=chromosome | SO=protein_coding_gene | is_pseudo=false	[R].EMPSEEGSRWDTDEEDGETGGGGGQA.[-]	1xTMTpro [N-Term]; 1xPhospho [T12(100)]	TGGT1_248840-t26_1-p1 1xPhospho [T743(100)]	6	High	1.47332e-06	9.56086e-05	1	1	TGGT1_248840-t26_1-p1	TGGT1_248840-t26_1-p1 [732-757]	1	3067.21	1.294	0.37	1	28.8	22.3	33	25.8	46.4	31	22.4	26.8	14	22	22.6	27.3		High	7.761e-05	5.626e-07	4.62
54499	TGGT1_242090	zinc finger (CCCH type) motif-containing protein	transcript=TGGT1_242090-t26_1 | gene=TGGT1_242090 | organism=Toxoplasma_gondii_GT1 | gene_product=Zinc finger (CCCH type) motif-containing protein [Source:UniProtKB/TrEMBL;Acc:S7US98] | transcript_product=zinc finger (CCCH type) motif-containing protein | location=TGGT1_chrVI:1823873-1827103(+) | protein_length=852 | sequence_SO=chromosome | SO=protein_coding_gene | is_pseudo=false	[K].IEATGEDVYGHVATGTLSRK.[S]	1xTMTpro [K20]; 1xTMTpro [N-Term]; 1xPhospho [T/S/Y]		1	High	0.000149278	9.56086e-05	1	1	TGGT1_242090-t26_1-p1	TGGT1_242090-t26_1-p1 [802-821]	1	2792.45	1.171	0.23	1	35.9	30.6	15.61	0.76	NA	NA	32.1	40.1	NA	NA	30.5	30.8		High	7.761e-05	8.575e-05	3.57
54504	TGGT1_244110	nucleosome assembly protein (nap) protein	transcript=TGGT1_244110-t26_1 | gene=TGGT1_244110 | organism=Toxoplasma_gondii_GT1 | gene_product=Nucleosome assembly protein (Nap) protein [Source:UniProtKB/TrEMBL;Acc:S7UG11] | transcript_product=nucleosome assembly protein (nap) protein | location=TGGT1_chrVI:2942300-2948890(+) | protein_length=738 | sequence_SO=chromosome | SO=protein_coding_gene | is_pseudo=false	[R].LEAVTIDNKSEEENEILSSLSPEQR.[R]	1xTMTpro [K9]; 1xTMTpro [N-Term]; 1xPhospho [S10(100)]	TGGT1_244110-t26_1-p1 1xPhospho [S408(100)]	2	High	8.4133e-08	9.56086e-05	1	1	TGGT1_244110-t26_1-p1	TGGT1_244110-t26_1-p1 [399-423]	1	3518.78	0.999	0	1	180.5	180.8	87.04	85.09	68	69.6	505.7	468.1	74.1	60	441	443.1		High	7.761e-05	2.565e-08	6.47
26375	TGGT1_320020	transporter, major facilitator family protein	transcript=TGGT1_320020-t26_1 | gene=TGGT1_320020 | organism=Toxoplasma_gondii_GT1 | gene_product=Transporter, major facilitator family protein [Source:UniProtKB/TrEMBL;Acc:S7UJG3] | transcript_product=transporter, major facilitator family protein | location=TGGT1_chrIV:518139-519905(-) | protein_length=588 | sequence_SO=chromosome | SO=protein_coding_gene | is_pseudo=false	[K].EMCHDLSEEAPGRPHEAESAGSK.[T]	1xMethylthio [C3]; 1xTMTpro [K23]; 1xTMTpro [N-Term]; 3xPhospho [S7(100); S19(100); S22(100)]	TGGT1_320020-t26_1-p1 1xMethylthio [C336]; 3xPhospho [S340(100); S352(100); S355(100)]	3	High	5.47592e-05	9.56086e-05	1	1	TGGT1_320020-t26_1-p1	TGGT1_320020-t26_1-p1 [334-356]	0	3361.36	0.914	-0.13	1	116.8	127.9	3.87	10.07	NA	NA	120.1	113.7	NA	NA	119.1	137.3		High	7.761e-05	2.813e-05	5.79
26374	TGGT1_320020	transporter, major facilitator family protein	transcript=TGGT1_320020-t26_1 | gene=TGGT1_320020 | organism=Toxoplasma_gondii_GT1 | gene_product=Transporter, major facilitator family protein [Source:UniProtKB/TrEMBL;Acc:S7UJG3] | transcript_product=transporter, major facilitator family protein | location=TGGT1_chrIV:518139-519905(-) | protein_length=588 | sequence_SO=chromosome | SO=protein_coding_gene | is_pseudo=false	[K].EMCHDLSEEAPGRPHEAESAGSK.[T]	1xOxidation [M2]; 1xMethylthio [C3]; 1xTMTpro [K23]; 1xTMTpro [N-Term]; 2xPhospho [S19(100); S22(100)]	TGGT1_320020-t26_1-p1 1xMethylthio [C336]; 2xPhospho [S352(100); S355(100)]	15	High	6.68781e-06	9.56086e-05	1	1	TGGT1_320020-t26_1-p1	TGGT1_320020-t26_1-p1 [334-356]	0	3297.39	1.064	0.09	1	391.9	368.5	3.9	3.35	NA	NA	381.3	402.9	NA	NA	359.9	377.4		High	7.761e-05	2.876e-06	5.22
26373	TGGT1_320020	transporter, major facilitator family protein	transcript=TGGT1_320020-t26_1 | gene=TGGT1_320020 | organism=Toxoplasma_gondii_GT1 | gene_product=Transporter, major facilitator family protein [Source:UniProtKB/TrEMBL;Acc:S7UJG3] | transcript_product=transporter, major facilitator family protein | location=TGGT1_chrIV:518139-519905(-) | protein_length=588 | sequence_SO=chromosome | SO=protein_coding_gene | is_pseudo=false	[K].EMCHDLSEEAPGRPHEAESAGSK.[T]	1xMethylthio [C3]; 1xTMTpro [K23]; 1xTMTpro [N-Term]; 2xPhospho [S19(100); S22(100)]	TGGT1_320020-t26_1-p1 1xMethylthio [C336]; 2xPhospho [S352(100); S355(100)]	18	High	4.69081e-08	9.56086e-05	1	1	TGGT1_320020-t26_1-p1	TGGT1_320020-t26_1-p1 [334-356]	0	3281.4	0.997	0	1	636.1	638.2	0.72	1.02	NA	NA	639.3	632.8	NA	NA	633.6	642.8		High	7.761e-05	1.366e-08	7.42
78040	TGGT1_224230	AP2 domain transcription factor AP2X-3	transcript=TGGT1_224230-t26_1 | gene=TGGT1_224230 | organism=Toxoplasma_gondii_GT1 | gene_product=AP2 domain transcription factor AP2X-3 [Source:UniProtKB/TrEMBL;Acc:S7UVR7] | transcript_product=AP2 domain transcription factor AP2X-3 | location=TGGT1_chrX:3108419-3115037(+) | protein_length=1919 | sequence_SO=chromosome | SO=protein_coding_gene | is_pseudo=false	[R].RLSASEEEATLASK.[N]	1xTMTpro [K14]; 1xTMTpro [N-Term]; 1xPhospho [S3(100)]	TGGT1_224230-t26_1-p1 1xPhospho [S20(100)]	2	High	0.000118688	9.56086e-05	1	1	TGGT1_224230-t26_1-p1	TGGT1_224230-t26_1-p1 [18-31]	1	2180.15	1.216	0.28	1	49.1	40.4	28.44	25.04	70.7	52.3	36	46.1	49.2	50.1	33.2	30.9		High	0.0001044	7.019e-05	3.27
26508	TGGT1_287170	hypothetical protein	transcript=TGGT1_287170-t26_1 | gene=TGGT1_287170 | organism=Toxoplasma_gondii_GT1 | gene_product=hypothetical protein | transcript_product=hypothetical protein | location=TGGT1_chrV:1407962-1410454(-) | protein_length=363 | sequence_SO=chromosome | SO=protein_coding_gene | is_pseudo=false	[R].EMSPVPAIPSGGSPSR.[T]	1xOxidation [M2]; 1xTMTpro [N-Term]; 1xPhospho [S13(99.5)]	TGGT1_287170-t26_1-p1 1xPhospho [S227(99.5)]	11	High	1.55763e-05	9.56086e-05	1	1	TGGT1_287170-t26_1-p1	TGGT1_287170-t26_1-p1 [215-230]	0	1968.94	1.129	0.17	1	147.9	131.1	3.34	2.52	NA	NA	144.5	151.5	NA	NA	128.7	133.4		High	7.761e-05	7.165e-06	3.82
95064	TGGT1_311480	hypothetical protein	transcript=TGGT1_311480-t26_1 | gene=TGGT1_311480 | organism=Toxoplasma_gondii_GT1 | gene_product=hypothetical protein | transcript_product=hypothetical protein | location=TGGT1_chrXI:2071805-2077652(-) | protein_length=386 | sequence_SO=chromosome | SO=protein_coding_gene | is_pseudo=false	[R].SSDDLLELLEQDDTEEGR.[A]	1xTMTpro [N-Term]; 1xPhospho [S2(99.8)]	TGGT1_311480-t26_1-p1 1xPhospho [S313(99.8)]	7	High	6.90932e-08	9.56086e-05	1	1	TGGT1_311480-t26_1-p1	TGGT1_311480-t26_1-p1 [312-329]	0	2448.1	1.197	0.26	1	36	30.1	23.12	16.53	24.2	33.6	38.6	42.9	32.5	31.2	29.1	21.9		High	7.761e-05	2.077e-08	6.09
26626	TGGT1_209280	hypothetical protein	transcript=TGGT1_209280-t26_1 | gene=TGGT1_209280 | organism=Toxoplasma_gondii_GT1 | gene_product=hypothetical protein | transcript_product=hypothetical protein | location=TGGT1_chrIb:1194711-1203766(+) | protein_length=1602 | sequence_SO=chromosome | SO=protein_coding_gene | is_pseudo=false	[K].ENDGHTPIRDETER.[E]	1xTMTpro [N-Term]; 1xPhospho [T6(100)]	TGGT1_209280-t26_1-p1 1xPhospho [T1510(100)]	8	High	0.000138396	9.56086e-05	1	1	TGGT1_209280-t26_1-p1	TGGT1_209280-t26_1-p1 [1505-1518]	1	2052.93	1.269	0.34	1	91.3	71.9	7.61	11.8	NA	NA	96.3	86.5	NA	NA	66.1	78.2		High	7.761e-05	7.872e-05	3.28
94852	TGGT1_228080	dihydrouridine synthase (dus) protein	transcript=TGGT1_228080-t26_1 | gene=TGGT1_228080 | organism=Toxoplasma_gondii_GT1 | gene_product=tRNA-dihydrouridine(47) synthase [NAD(P)(+)] [Source:UniProtKB/TrEMBL;Acc:S7W5V4] | transcript_product=dihydrouridine synthase (dus) protein | location=TGGT1_chrX:504526-514341(+) | protein_length=1220 | sequence_SO=chromosome | SO=protein_coding_gene | is_pseudo=false	[K].SSASASTPPPPQGHEGPCGGQWVK.[K]	1xMethylthio [C18]; 1xTMTpro [K24]; 1xTMTpro [N-Term]; 1xPhospho [T7(99.5)]	TGGT1_228080-t26_1-p1 1xMethylthio [C235]; 1xPhospho [T224(99.5)]	1	High	2.08531e-06	9.56086e-05	1	1	TGGT1_228080-t26_1-p1	TGGT1_228080-t26_1-p1 [218-241]	0	3096.46	1.167	0.22	1	15.4	13.2	19.19	15.93	NA	NA	17.6	13.4	NA	NA	14.8	11.8		High	7.761e-05	8.172e-07	3.53
26760	TGGT1_271740	hypothetical protein	transcript=TGGT1_271740-t26_1 | gene=TGGT1_271740 | organism=Toxoplasma_gondii_GT1 | gene_product=hypothetical protein | transcript_product=hypothetical protein | location=TGGT1_chrVIII:4419752-4431388(+) | protein_length=1992 | sequence_SO=chromosome | SO=protein_coding_gene | is_pseudo=false	[K].ENPPHSFSPASSSVSAAPAPR.[A]	1xTMTpro [N-Term]; 1xPhospho [S8(100)]	TGGT1_271740-t26_1-p1 1xPhospho [S65(100)]	5	High	2.89164e-07	9.56086e-05	1	1	TGGT1_271740-t26_1-p1	TGGT1_271740-t26_1-p1 [58-78]	0	2477.18	1.053	0.07	1	44.6	42.3	27.95	7.96	NA	NA	36.5	54.5	NA	NA	40	44.8		High	7.761e-05	9.707e-08	5.74
54417	TGGT1_299210	CTP synthase	transcript=TGGT1_299210-t26_1 | gene=TGGT1_299210 | organism=Toxoplasma_gondii_GT1 | gene_product=CTP synthase [Source:UniProtKB/TrEMBL;Acc:A0A125YWQ6] | transcript_product=CTP synthase | location=TGGT1_chrIII:2095036-2100826(+) | protein_length=652 | sequence_SO=chromosome | SO=protein_coding_gene | is_pseudo=false	[R].LDVATPASPASRPGAPLYK.[T]	1xTMTpro [K19]; 1xTMTpro [N-Term]; 1xPhospho [S8(100)]	TGGT1_299210-t26_1-p1 1xPhospho [S333(100)]	6	High	1.24866e-06	9.56086e-05	1	1	TGGT1_299210-t26_1-p1	TGGT1_299210-t26_1-p1 [326-344]	0	2599.41	1.053	0.08	1	569.2	540.3	18.22	24.54	689.3	646	501.5	475.9	664.5	672.1	429	439.4		High	0.0001044	7.988e-07	5.42
26742	TGGT1_219700	putative DNA replication licensing factor MCM4	transcript=TGGT1_219700-t26_1 | gene=TGGT1_219700 | organism=Toxoplasma_gondii_GT1 | gene_product=MCM domain-containing protein [Source:UniProtKB/TrEMBL;Acc:S7V296] | transcript_product=putative DNA replication licensing factor MCM4 | location=TGGT1_chrXII:651605-660187(+) | protein_length=1014 | sequence_SO=chromosome | SO=protein_coding_gene | is_pseudo=false	[R].ENMEAEHDTQGAEDNFQR.[S]	1xOxidation [M3]; 1xTMTpro [N-Term]; 1xPhospho [T9(100)]	TGGT1_219700-t26_1-p1 1xPhospho [T68(100)]	9	High	2.2877e-06	9.56086e-05	1	1	TGGT1_219700-t26_1-p1	TGGT1_219700-t26_1-p1 [60-77]	0	2521.03	0.901	-0.15	1	91.5	101.5	11.03	11.05	NA	NA	84.6	98.9	NA	NA	109.8	93.9		High	7.761e-05	9.037e-07	4.63
26741	TGGT1_219700	putative DNA replication licensing factor MCM4	transcript=TGGT1_219700-t26_1 | gene=TGGT1_219700 | organism=Toxoplasma_gondii_GT1 | gene_product=MCM domain-containing protein [Source:UniProtKB/TrEMBL;Acc:S7V296] | transcript_product=putative DNA replication licensing factor MCM4 | location=TGGT1_chrXII:651605-660187(+) | protein_length=1014 | sequence_SO=chromosome | SO=protein_coding_gene | is_pseudo=false	[R].ENMEAEHDTQGAEDNFQR.[S]	1xTMTpro [N-Term]; 1xPhospho [T9(100)]	TGGT1_219700-t26_1-p1 1xPhospho [T68(100)]	9	High	6.11949e-07	9.56086e-05	1	1	TGGT1_219700-t26_1-p1	TGGT1_219700-t26_1-p1 [60-77]	0	2505.03	0.998	0	1	53.6	53.7	51.39	41.29	34.5	31.5	87.9	83.2	40.5	31.2	77.6	71.2		High	7.761e-05	2.178e-07	5.44
54420	TGGT1_264130	hypothetical protein	transcript=TGGT1_264130-t26_1 | gene=TGGT1_264130 | organism=Toxoplasma_gondii_GT1 | gene_product=hypothetical protein | transcript_product=hypothetical protein | location=TGGT1_chrVIIb:133422-137648(-) | protein_length=673 | sequence_SO=chromosome | SO=protein_coding_gene | is_pseudo=false	[R].LDVGEERPDLSPLR.[R]	1xTMTpro [N-Term]; 1xPhospho [S11(100)]	TGGT1_264130-t26_1-p1 1xPhospho [S269(100)]	5	High	7.75903e-06	9.56086e-05	1	1	TGGT1_264130-t26_1-p1	TGGT1_264130-t26_1-p1 [259-272]	0	1980.01	1.014	0.02	1	377.8	372.6	48.13	45.93	561.1	629.2	254.3	240.5	549.7	583.4	252.5	237.3		High	0.0001044	4.724e-06	4.54
26734	TGGT1_309220	GTPase activating protein for Arf protein	transcript=TGGT1_309220-t26_1 | gene=TGGT1_309220 | organism=Toxoplasma_gondii_GT1 | gene_product=Arf-GAP domain-containing protein [Source:UniProtKB/TrEMBL;Acc:S7W7Q4] | transcript_product=GTPase activating protein for Arf protein | location=TGGT1_chrXI:525668-532349(-) | protein_length=557 | sequence_SO=chromosome | SO=protein_coding_gene | is_pseudo=false	[K].ENLSEADCSGMSPR.[A]	1xOxidation [M11]; 1xMethylthio [C8]; 1xTMTpro [N-Term]; 1xPhospho [S12(100)]	TGGT1_309220-t26_1-p1 1xMethylthio [C209]; 1xPhospho [S213(100)]	8	High	1.47332e-06	9.56086e-05	1	1	TGGT1_309220-t26_1-p1	TGGT1_309220-t26_1-p1 [202-215]	0	1941.77	0.954	-0.07	1	54.6	57.3	57.62	59.75	88.1	86.1	34.7	24.2	111.7	87	28.9	37.7		High	7.761e-05	5.621e-07	4.55
78091	TGGT1_213660	zinc finger (CCCH type) motif-containing protein	transcript=TGGT1_213660-t26_1 | gene=TGGT1_213660 | organism=Toxoplasma_gondii_GT1 | gene_product=Zinc finger (CCCH type) motif-containing protein [Source:UniProtKB/TrEMBL;Acc:S7UPG3] | transcript_product=zinc finger (CCCH type) motif-containing protein | location=TGGT1_chrV:1080657-1085300(-) | protein_length=1220 | sequence_SO=chromosome | SO=protein_coding_gene | is_pseudo=false	[R].RLSFDQNEVYQVR.[Q]	1xTMTpro [N-Term]; 1xPhospho [S3(100)]	TGGT1_213660-t26_1-p1 1xPhospho [S230(100)]	4	High	1.40897e-05	9.56086e-05	1	1	TGGT1_213660-t26_1-p1	TGGT1_213660-t26_1-p1 [228-240]	1	2038.01	1.593	0.67	0.0115461	359.5	225.6	8.17	7.62	334.4	342	377.9	397	217.3	234.3	206.2	244.8		High	0.0001044	8.453e-06	4.31
78079	TGGT1_211030	hypothetical protein	transcript=TGGT1_211030-t26_1 | gene=TGGT1_211030 | organism=Toxoplasma_gondii_GT1 | gene_product=hypothetical protein | transcript_product=hypothetical protein | location=TGGT1_chrIV:1889471-1891938(-) | protein_length=191 | sequence_SO=chromosome | SO=protein_coding_gene | is_pseudo=false	[K].RLSEEVDSSPDSTCK.[C]	1xMethylthio [C14]; 1xTMTpro [K15]; 1xTMTpro [N-Term]; 1xPhospho [S3(100)]	TGGT1_211030-t26_1-p1 1xMethylthio [C121]; 1xPhospho [S110(100)]	1	High	9.75864e-06	9.56086e-05	1	1	TGGT1_211030-t26_1-p1	TGGT1_211030-t26_1-p1 [108-122]	1	2387.11	1.216	0.28	1	22.7	18.7	13.16	5	NA	NA	20.7	24.9	NA	NA	18	19.4		High	7.761e-05	4.327e-06	4.39
26723	TGGT1_289820	TBC domain-containing protein	transcript=TGGT1_289820-t26_1 | gene=TGGT1_289820 | organism=Toxoplasma_gondii_GT1 | gene_product=Rab-GAP TBC domain-containing protein [Source:UniProtKB/TrEMBL;Acc:S7UPX3] | transcript_product=TBC domain-containing protein | location=TGGT1_chrIX:3273404-3279144(+) | protein_length=1047 | sequence_SO=chromosome | SO=protein_coding_gene | is_pseudo=false	[R].ENHVSTPDSAK.[E]	1xTMTpro [K11]; 1xTMTpro [N-Term]; 2xPhospho [T6(100); S9(100)]	TGGT1_289820-t26_1-p1 2xPhospho [T327(100); S330(100)]	5	High	0.00011781	9.56086e-05	1	1	TGGT1_289820-t26_1-p1	TGGT1_289820-t26_1-p1 [322-332]	0	1952.9	1.192	0.25	1	66.1	55.5	66.11	64.11	126.3	124.2	32.9	35.2	125.8	90.7	33.1	34		High	0.0001044	6.97e-05	3.8
54438	TGGT1_291180	hypothetical protein	transcript=TGGT1_291180-t26_1 | gene=TGGT1_291180 | organism=Toxoplasma_gondii_GT1 | gene_product=hypothetical protein | transcript_product=hypothetical protein | location=TGGT1_chrIX:4004987-4034538(-) | protein_length=5394 | sequence_SO=chromosome | SO=protein_coding_gene | is_pseudo=false	[K].LEAADGLGSDDEAGVTR.[G]	1xTMTpro [N-Term]; 1xPhospho [S9(100)]	TGGT1_291180-t26_1-p1 1xPhospho [S907(100)]	11	High	1.5015e-07	9.56086e-05	1	1	TGGT1_291180-t26_1-p1	TGGT1_291180-t26_1-p1 [899-915]	0	2059.95	1.058	0.08	1	151.4	143.2	53.98	54.8	243	267.2	92	94.4	245.8	231.2	88.6	81.9		High	0.0001044	1.02e-07	5.81
26718	TGGT1_309752	putative succinate-Coenzyme A ligase, beta subunit	transcript=TGGT1_309752-t26_1 | gene=TGGT1_309752 | organism=Toxoplasma_gondii_GT1 | gene_product=Succinate--CoA ligase [ADP-forming] subunit beta, mitochondrial [Source:UniProtKB/TrEMBL;Acc:A0A125YHZ3] | transcript_product=putative succinate-Coenzyme A ligase, beta subunit | location=TGGT1_chrXI:749202-752425(+) | protein_length=498 | sequence_SO=chromosome | SO=protein_coding_gene | is_pseudo=f…	[R].ENGYQGGVQVCESPR.[E]	1xMethylthio [C11]; 1xTMTpro [N-Term]; 1xPhospho [S13(100)]	TGGT1_309752-t26_1-p1 1xMethylthio [C151]; 1xPhospho [S153(100)]	2	High	8.46393e-07	9.56086e-05	1	1	TGGT1_309752-t26_1-p1	TGGT1_309752-t26_1-p1 [141-155]	0	2052.88	1.065	0.09	1	81	76	24.51	20.2	117.5	90.2	71.2	72.7	89.9	91.8	64.3	63.4		High	7.761e-05	3.092e-07	5.01
94900	TGGT1_257150	NOT2 / NOT3 / NOT5 family protein	transcript=TGGT1_257150-t26_1 | gene=TGGT1_257150 | organism=Toxoplasma_gondii_GT1 | gene_product=NOT2_3_5 domain-containing protein [Source:UniProtKB/TrEMBL;Acc:S7UZ75] | transcript_product=NOT2 / NOT3 / NOT5 family protein | location=TGGT1_chrVIIb:4123567-4127399(+) | protein_length=499 | sequence_SO=chromosome | SO=protein_coding_gene | is_pseudo=false	[R].SSASQGSGPSSHAIPQR.[A]	1xTMTpro [N-Term]; 2xPhospho [S7(100); S]	TGGT1_257150-t26_1-p1 2xPhospho [S34(100); S]	7	High	1.13564e-05	9.56086e-05	1	1	TGGT1_257150-t26_1-p1	TGGT1_257150-t26_1-p1 [28-44]	0	2117.93	0.97	-0.04	1	35	36	38.53	49.01	26.9	27.1	58	45.1	24.5	19	53.1	53.8		High	7.761e-05	5.099e-06	4.04
78065	TGGT1_313900	non-specific serine/threonine protein kinase	transcript=TGGT1_313900-t26_1 | gene=TGGT1_313900 | organism=Toxoplasma_gondii_GT1 | gene_product=Non-specific serine/threonine protein kinase [Source:UniProtKB/TrEMBL;Acc:S7UTJ1] | transcript_product=non-specific serine/threonine protein kinase | location=TGGT1_chrXI:3752886-3763570(+) | protein_length=3422 | sequence_SO=chromosome | SO=protein_coding_gene | is_pseudo=false	[R].RLSDEEGEDVFSAGR.[K]	1xTMTpro [N-Term]; 1xPhospho [S3(100)]	TGGT1_313900-t26_1-p1 1xPhospho [S2746(100)]	6	High	2.04433e-06	9.56086e-05	1	1	TGGT1_313900-t26_1-p1	TGGT1_313900-t26_1-p1 [2744-2758]	1	2050.94	1.138	0.19	1	138	121.2	49.9	34.26	216.1	210.3	90.5	79	154.6	171.2	95.1	83.7		High	7.761e-05	7.999e-07	4.42
26705	TGGT1_257760	hypothetical protein	transcript=TGGT1_257760-t26_1 | gene=TGGT1_257760 | organism=Toxoplasma_gondii_GT1 | gene_product=hypothetical protein | transcript_product=hypothetical protein | location=TGGT1_chrVIIb:3778455-3782183(-) | protein_length=1242 | sequence_SO=chromosome | SO=protein_coding_gene | is_pseudo=false	[R].ENGEVPLSHGEVGDSDEDSAR.[T]	1xTMTpro [N-Term]; 1xPhospho [S15(100)]	TGGT1_257760-t26_1-p1 1xPhospho [S606(100)]	2	High	2.2092e-05	9.56086e-05	1	1	TGGT1_257760-t26_1-p1	TGGT1_257760-t26_1-p1 [592-612]	0	2583.12	1.29	0.37	1	17.2	13.3	14.49	15.51	NA	NA	19	15.5	NA	NA	11.9	14.9		High	7.761e-05	1.048e-05	4.25
26692	TGGT1_238410	hypothetical protein	transcript=TGGT1_238410-t26_1 | gene=TGGT1_238410 | organism=Toxoplasma_gondii_GT1 | gene_product=hypothetical protein | transcript_product=hypothetical protein | location=TGGT1_chrVI:210000-214878(+) | protein_length=1535 | sequence_SO=chromosome | SO=protein_coding_gene | is_pseudo=false	[K].ENFSRENTGNHQAGTTEEK.[R]	1xTMTpro [K19]; 1xTMTpro [N-Term]; 2xPhospho [S4(100); T8(100)]	TGGT1_238410-t26_1-p1 2xPhospho [S337(100); T341(100)]	8	High	0.000130219	9.56086e-05	1	1	TGGT1_238410-t26_1-p1	TGGT1_238410-t26_1-p1 [334-352]	1	2917.3	0.434	-1.2	0.053467	45.2	104	20.19	15.35	64.3	46.5	43.2	43.9	126.6	112	96.7	90.1		High	7.761e-05	7.35e-05	4.7
26685	TGGT1_306300	hypothetical protein	transcript=TGGT1_306300-t26_1 | gene=TGGT1_306300 | organism=Toxoplasma_gondii_GT1 | gene_product=hypothetical protein | transcript_product=hypothetical protein | location=TGGT1_chrIX:5705474-5714461(+) | protein_length=2995 | sequence_SO=chromosome | SO=protein_coding_gene | is_pseudo=false	[R].ENEVESARSPR.[E]	1xTMTpro [N-Term]; 1xPhospho [S9(100)]	TGGT1_306300-t26_1-p1 1xPhospho [S927(100)]	3	High	4.59067e-05	9.56086e-05	1	1	TGGT1_306300-t26_1-p1	TGGT1_306300-t26_1-p1 [919-929]	1	1657.79	1.188	0.25	1	85	71.5	3.44	4.01	NA	NA	82.9	87.1	NA	NA	73.6	69.5		High	7.761e-05	2.317e-05	3.93
26680	TGGT1_201250	putative histone lysine methyltransferase, SET	transcript=TGGT1_201250-t26_1 | gene=TGGT1_201250 | organism=Toxoplasma_gondii_GT1 | gene_product=Putative histone lysine methyltransferase, SET [Source:UniProtKB/TrEMBL;Acc:S7UV73] | transcript_product=putative histone lysine methyltransferase, SET | location=TGGT1_chrVIIa:3839435-3846508(+) | protein_length=1635 | sequence_SO=chromosome | SO=protein_coding_gene | is_pseudo=false	[K].ENETEAEAADAGDEAEDEGR.[T]	1xTMTpro [N-Term]; 1xPhospho [T4(100)]	TGGT1_201250-t26_1-p1 1xPhospho [T1549(100)]	5	High	1.42242e-08	9.56086e-05	1	1	TGGT1_201250-t26_1-p1	TGGT1_201250-t26_1-p1 [1546-1565]	0	2491.99	1.227	0.3	1	7.9	6.4	4.48	2.15	NA	NA	8.1	7.6	NA	NA	6.3	6.5		High	7.761e-05	3.777e-09	6.56
94921	TGGT1_309250	hypothetical protein	transcript=TGGT1_309250-t26_1 | gene=TGGT1_309250 | organism=Toxoplasma_gondii_GT1 | gene_product=hypothetical protein | transcript_product=hypothetical protein | location=TGGT1_chrXI:547054-561278(-) | protein_length=3801 | sequence_SO=chromosome | SO=protein_coding_gene | is_pseudo=false	[K].SSASSEAPASPGTAR.[E]	1xTMTpro [N-Term]; 1xPhospho [S10(100)]	TGGT1_309250-t26_1-p1 1xPhospho [S837(100)]	7	High	7.86215e-06	9.56086e-05	1	1	TGGT1_309250-t26_1-p1	TGGT1_309250-t26_1-p1 [828-842]	0	1759.82	1.181	0.24	1	19.9	16.8	22.41	20.11	26.4	21.2	18.6	15.5	16	13.6	21.9	17.8		High	7.761e-05	3.423e-06	4.65
26673	TGGT1_310930	hypothetical protein	transcript=TGGT1_310930-t26_1 | gene=TGGT1_310930 | organism=Toxoplasma_gondii_GT1 | gene_product=hypothetical protein | transcript_product=hypothetical protein | location=TGGT1_chrXI:1636895-1641854(-) | protein_length=808 | sequence_SO=chromosome | SO=protein_coding_gene | is_pseudo=false	[K].ENESDNSHGESDQDLR.[R]	1xTMTpro [N-Term]; 3xPhospho [S4(100); S7(100); S11(100)]	TGGT1_310930-t26_1-p1 3xPhospho [S276(100); S279(100); S283(100)]	3	High	0.000120639	9.56086e-05	1	1	TGGT1_310930-t26_1-p1	TGGT1_310930-t26_1-p1 [273-288]	0	2375.84	1.615	0.69	1	25.3	15.7	4.34	20.54	24.6	26.1	NA	NA	18.2	13.6	NA	NA		High	0.0001044	7.145e-05	3.61
26672	TGGT1_310930	hypothetical protein	transcript=TGGT1_310930-t26_1 | gene=TGGT1_310930 | organism=Toxoplasma_gondii_GT1 | gene_product=hypothetical protein | transcript_product=hypothetical protein | location=TGGT1_chrXI:1636895-1641854(-) | protein_length=808 | sequence_SO=chromosome | SO=protein_coding_gene | is_pseudo=false	[K].ENESDNSHGESDQDLR.[R]	1xTMTpro [N-Term]; 2xPhospho [S4(100); S7(100)]	TGGT1_310930-t26_1-p1 2xPhospho [S276(100); S279(100)]	8	High	5.10382e-05	9.56086e-05	1	1	TGGT1_310930-t26_1-p1	TGGT1_310930-t26_1-p1 [273-288]	0	2295.87	1.064	0.09	1	45.9	43.2	36.49	10.34	54	78.5	39	37.3	51	41.5	41	44.9		High	7.761e-05	2.602e-05	4.02
26666	TGGT1_312580	hypothetical protein	transcript=TGGT1_312580-t26_1 | gene=TGGT1_312580 | organism=Toxoplasma_gondii_GT1 | gene_product=hypothetical protein | transcript_product=hypothetical protein | location=TGGT1_chrXI:2761410-2766638(+) | protein_length=908 | sequence_SO=chromosome | SO=protein_coding_gene | is_pseudo=false	[K].ENEGSVTHVESTGVDSK.[N]	1xTMTpro [K17]; 1xTMTpro [N-Term]; 1xPhospho [S5(99.6)]	TGGT1_312580-t26_1-p1 1xPhospho [S787(99.6)]	3	High	0.000122435	9.56086e-05	1	1	TGGT1_312580-t26_1-p1	TGGT1_312580-t26_1-p1 [783-799]	0	2463.19	0.861	-0.22	1	10.4	12.1	35.86	3.02	NA	NA	8.1	13.5	NA	NA	11.9	12.4		High	7.761e-05	6.85e-05	3.14
26658	TGGT1_226890	hypothetical protein	transcript=TGGT1_226890-t26_1 | gene=TGGT1_226890 | organism=Toxoplasma_gondii_GT1 | gene_product=ORC_WH_C domain-containing protein [Source:UniProtKB/TrEMBL;Acc:S7WD02] | transcript_product=hypothetical protein | location=TGGT1_chrX:1166477-1173027(+) | protein_length=2068 | sequence_SO=chromosome | SO=protein_coding_gene | is_pseudo=false	[K].ENEESEEEEEK.[T]	1xTMTpro [K11]; 1xTMTpro [N-Term]; 1xPhospho [S5(100)]	TGGT1_226890-t26_1-p1 1xPhospho [S1125(100)]	13	High	8.32814e-05	9.56086e-05	1	1	TGGT1_226890-t26_1-p1	TGGT1_226890-t26_1-p1 [1121-1131]	0	2068.91	1.05	0.07	1	89.1	84.9	4.28	9.6	82.8	91.3	88.1	90.1	80.2	75.4	89.8	92.7		High	0.0001044	4.885e-05	3.26
26657	TGGT1_224110	putative adhesion regulating molecule region protein	transcript=TGGT1_224110-t26_1 | gene=TGGT1_224110 | organism=Toxoplasma_gondii_GT1 | gene_product=RPN13_C domain-containing protein [Source:UniProtKB/TrEMBL;Acc:S7WBV2] | transcript_product=putative adhesion regulating molecule region protein | location=TGGT1_chrX:3221943-3228219(+) | protein_length=396 | sequence_SO=chromosome | SO=protein_coding_gene | is_pseudo=false	[K].ENEENSEQDTSGGEK.[K]	1xTMTpro [K15]; 1xTMTpro [N-Term]; 1xPhospho [S6(100)]	TGGT1_224110-t26_1-p1 1xPhospho [S384(100)]	4	High	0.000117461	9.56086e-05	1	1	TGGT1_224110-t26_1-p1	TGGT1_224110-t26_1-p1 [379-393]	0	2341.03	0.993	-0.01	1	9.3	9.3	18.41	4.71	NA	NA	10.6	8.1	NA	NA	9	9.7		High	7.761e-05	6.537e-05	3.05
26645	TGGT1_258080	hypothetical protein	transcript=TGGT1_258080-t26_1 | gene=TGGT1_258080 | organism=Toxoplasma_gondii_GT1 | gene_product=hypothetical protein | transcript_product=hypothetical protein | location=TGGT1_chrVIIb:3558189-3569675(+) | protein_length=1711 | sequence_SO=chromosome | SO=protein_coding_gene | is_pseudo=false	[R].ENEDHLLSPVK.[G]	1xTMTpro [K11]; 1xTMTpro [N-Term]; 1xPhospho [S8(100)]	TGGT1_258080-t26_1-p1 1xPhospho [S403(100)]	1	High	5.11201e-05	9.56086e-05	1	1	TGGT1_258080-t26_1-p1	TGGT1_258080-t26_1-p1 [396-406]	0	1969.03	1.581	0.66	0.050511	84.7	53.6	3.4	1.89	NA	NA	86.8	82.7	NA	NA	54.3	52.9		High	7.761e-05	2.609e-05	3.61
78077	TGGT1_263230	hypothetical protein	transcript=TGGT1_263230-t26_1 | gene=TGGT1_263230 | organism=Toxoplasma_gondii_GT1 | gene_product=hypothetical protein | transcript_product=hypothetical protein | location=TGGT1_chrVIIb:666957-669632(+) | protein_length=891 | sequence_SO=chromosome | SO=protein_coding_gene | is_pseudo=false	[R].RLSEALFQDK.[S]	1xTMTpro [K10]; 1xTMTpro [N-Term]; 1xPhospho [S3(100)]	TGGT1_263230-t26_1-p1 1xPhospho [S883(100)]	1	High	1.28071e-05	9.56086e-05	1	1	TGGT1_263230-t26_1-p1	TGGT1_263230-t26_1-p1 [881-890]	1	1895.03	1.014	0.02	1	130.6	128.8	1	1.8	NA	NA	129.7	131.5	NA	NA	127.2	130.5		High	7.761e-05	5.807e-06	4.99
78075	TGGT1_203320	zinc finger in N-recognin protein	transcript=TGGT1_203320-t26_1 | gene=TGGT1_203320 | organism=Toxoplasma_gondii_GT1 | gene_product=E3 ubiquitin-protein ligase [Source:UniProtKB/TrEMBL;Acc:S7WAU3] | transcript_product=zinc finger in N-recognin protein | location=TGGT1_chrVIIa:2474491-2497953(-) | protein_length=5382 | sequence_SO=chromosome | SO=protein_coding_gene | is_pseudo=false	[R].RLSEAGQPAPGITALTSVAPPGER.[E]	1xTMTpro [N-Term]; 1xPhospho [S3(100)]	TGGT1_203320-t26_1-p1 1xPhospho [S3774(100)]	1	High	1.02277e-07	9.56086e-05	1	1	TGGT1_203320-t26_1-p1	TGGT1_203320-t26_1-p1 [3772-3795]	1	2759.44	1.075	0.1	1	99.8	92.9	5.3	16.13	96.2	103.7	NA	NA	104.2	82.9	NA	NA		High	0.0001044	7.02e-08	5.77
94946	TGGT1_255300	hypothetical protein	transcript=TGGT1_255300-t26_1 | gene=TGGT1_255300 | organism=Toxoplasma_gondii_GT1 | gene_product=hypothetical protein | transcript_product=hypothetical protein | location=TGGT1_chrVIIb:4824891-4834235(+) | protein_length=2496 | sequence_SO=chromosome | SO=protein_coding_gene | is_pseudo=false	[R].SSASVGGVGPGGPAAYR.[H]	1xTMTpro [N-Term]; 1xPhospho [S4(99.2)]	TGGT1_255300-t26_1-p1 1xPhospho [S539(99.2)]	1	High	5.53745e-05	9.56086e-05	1	1	TGGT1_255300-t26_1-p1	TGGT1_255300-t26_1-p1 [536-552]	0	1873.91	0.92	-0.12	1	12.5	13.6	17.53	30.67	NA	NA	14.2	11.1	NA	NA	17	10.9		High	7.761e-05	2.844e-05	3.58
26693	TGGT1_265180	hypothetical protein	transcript=TGGT1_265180-t26_1 | gene=TGGT1_265180 | organism=Toxoplasma_gondii_GT1 | gene_product=hypothetical protein | transcript_product=hypothetical protein | location=TGGT1_chrIX:1546295-1548023(-) | protein_length=452 | sequence_SO=chromosome | SO=protein_coding_gene | is_pseudo=false	[R].ENGAPPSPSAALSPALR.[A]	1xTMTpro [N-Term]; 1xPhospho [S7(100)]	TGGT1_265180-t26_1-p1 1xPhospho [S212(100)]	1	High	1.64713e-05	9.56086e-05	1	1	TGGT1_265180-t26_1-p1	TGGT1_265180-t26_1-p1 [206-222]	0	2019.02	1.067	0.09	1	44.2	41.4	3.36	3.96	NA	NA	43.2	45.3	NA	NA	42.6	40.3		High	7.761e-05	7.621e-06	4.5
54408	TGGT1_241840	hypothetical protein	transcript=TGGT1_241840-t26_1 | gene=TGGT1_241840 | organism=Toxoplasma_gondii_GT1 | gene_product=CUE domain-containing protein [Source:UniProtKB/TrEMBL;Acc:S7W0I6] | transcript_product=hypothetical protein | location=TGGT1_chrVI:1675280-1679442(+) | protein_length=453 | sequence_SO=chromosome | SO=protein_coding_gene | is_pseudo=false	[R].LDTTAQAGGFVALEQHK.[G]	1xTMTpro [K17]; 1xTMTpro [N-Term]; 1xPhospho [T3(99.7)]	TGGT1_241840-t26_1-p1 1xPhospho [T398(99.7)]	2	High	4.00903e-05	9.56086e-05	1	1	TGGT1_241840-t26_1-p1	TGGT1_241840-t26_1-p1 [396-412]	0	2474.29	1.064	0.09	1	83.5	78.5	1.21	1.74	NA	NA	84.2	82.8	NA	NA	79.4	77.5		High	7.761e-05	1.999e-05	4.09
95135	TGGT1_298600	leucine zipper-like transcriptional regulator	transcript=TGGT1_298600-t26_1 | gene=TGGT1_298600 | organism=Toxoplasma_gondii_GT1 | gene_product=BTB domain-containing protein [Source:UniProtKB/TrEMBL;Acc:A0A125YP42] | transcript_product=leucine zipper-like transcriptional regulator | location=TGGT1_chrXI:6501701-6506001(+) | protein_length=855 | sequence_SO=chromosome | SO=protein_coding_gene | is_pseudo=false	[R].SSDSASATPSSPAGELASAR.[G]	1xTMTpro [N-Term]; 1xPhospho [S11(100)]	TGGT1_298600-t26_1-p1 1xPhospho [S367(100)]	4	High	1.32357e-05	9.56086e-05	1	1	TGGT1_298600-t26_1-p1	TGGT1_298600-t26_1-p1 [357-376]	0	2233.03	0.934	-0.1	1	14.8	15.8	38.36	64.89	17.9	20.5	12.3	8	31.9	25.8	9.7	7.1		High	7.761e-05	6.014e-06	3.73
26153	TGGT1_214740	hypothetical protein	transcript=TGGT1_214740-t26_1 | gene=TGGT1_214740 | organism=Toxoplasma_gondii_GT1 | gene_product=hypothetical protein | transcript_product=hypothetical protein | location=TGGT1_chrX:6349454-6354178(+) | protein_length=1574 | sequence_SO=chromosome | SO=protein_coding_gene | is_pseudo=false	[R].ELSAESDGDVEHK.[G]	1xTMTpro [K13]; 1xTMTpro [N-Term]; 1xPhospho [S6(100)]	TGGT1_214740-t26_1-p1 1xPhospho [S1015(100)]	15	High	5.30713e-06	9.56086e-05	1	1	TGGT1_214740-t26_1-p1	TGGT1_214740-t26_1-p1 [1010-1022]	0	2104.01	1.18	0.24	1	236	199.9	55.17	51.68	152.4	121.3	400.4	365.5	127.6	128.4	352.1	311.3		High	7.761e-05	2.239e-06	4.99
54610	TGGT1_313230	eukaryotic initiation factor-2, alpha subunit	transcript=TGGT1_313230-t26_1 | gene=TGGT1_313230 | organism=Toxoplasma_gondii_GT1 | gene_product=S1 motif domain-containing protein [Source:UniProtKB/TrEMBL;Acc:A0A125YGI2] | transcript_product=eukaryotic initiation factor-2, alpha subunit | location=TGGT1_chrXI:3161335-3165437(-) | protein_length=347 | sequence_SO=chromosome | SO=protein_coding_gene | is_pseudo=false	[R].LEELLEEANEDDSSDDEEEEEDEGMGR.[V]	1xOxidation [M25]; 1xTMTpro [N-Term]; 2xPhospho [S13(100); S14(100)]	TGGT1_313230-t26_1-p1 2xPhospho [S311(100); S312(100)]	12	High	2.30243e-08	9.56086e-05	1	1	TGGT1_313230-t26_1-p1	TGGT1_313230-t26_1-p1 [299-325]	0	3593.34	1.518	0.6	1	17	11.2	8.44	11.72	NA	NA	16.1	18.1	NA	NA	10.3	12.2		High	0.0001044	1.649e-08	5.51
95413	TGGT1_224870	hypothetical protein	transcript=TGGT1_224870-t26_1 | gene=TGGT1_224870 | organism=Toxoplasma_gondii_GT1 | gene_product=Spatacsin_C domain-containing protein [Source:UniProtKB/TrEMBL;Acc:S7WCA2] | transcript_product=hypothetical protein | location=TGGT1_chrX:2638976-2675045(+) | protein_length=8635 | sequence_SO=chromosome | SO=protein_coding_gene | is_pseudo=false	[R].SSFSFDPSHADAVER.[A]	1xTMTpro [N-Term]; 1xPhospho [S2(99.7)]	TGGT1_224870-t26_1-p1 1xPhospho [S2923(99.7)]	2	High	6.03696e-06	9.56086e-05	1	1	TGGT1_224870-t26_1-p1	TGGT1_224870-t26_1-p1 [2922-2936]	0	2035.91	1.363	0.45	1	42.4	31.1	13.58	25.68	38.6	36.3	46.6	47.9	33.2	19.9	29.1	38		High	7.761e-05	2.577e-06	4.63
26113	TGGT1_289615	hypothetical protein	transcript=TGGT1_289615-t26_1 | gene=TGGT1_289615 | organism=Toxoplasma_gondii_GT1 | gene_product=hypothetical protein | transcript_product=hypothetical protein | location=TGGT1_chrIX:3154768-3157035(+) | protein_length=214 | sequence_SO=chromosome | SO=protein_coding_gene | is_pseudo=false	[K].ELQTSEPGAGAAYPSCGSNASPAR.[R]	1xMethylthio [C16]; 1xTMTpro [N-Term]; 1xPhospho [S18(100)]	TGGT1_289615-t26_1-p1 1xMethylthio [C34]; 1xPhospho [S36(100)]	2	High	1.2786e-05	9.56086e-05	1	1	TGGT1_289615-t26_1-p1	TGGT1_289615-t26_1-p1 [19-42]	0	2751.21	0.834	-0.26	1	37.6	45.1	23.51	26.96	28.7	32	44.2	46.8	33.1	39.2	60.8	51.9		High	7.761e-05	5.793e-06	3.62
95459	TGGT1_253440	putative cell-cycle-associated protein kinase SRPK	transcript=TGGT1_253440-t26_1 | gene=TGGT1_253440 | organism=Toxoplasma_gondii_GT1 | gene_product=Protein kinase domain-containing protein [Source:UniProtKB/TrEMBL;Acc:S7UMJ9] | transcript_product=putative cell-cycle-associated protein kinase SRPK | location=TGGT1_chrIII:942676-953857(+) | protein_length=1763 | sequence_SO=chromosome | SO=protein_coding_gene | is_pseudo=false	[R].SSGAEIESDGAGER.[G]	1xTMTpro [N-Term]; 1xPhospho [S8(100)]	TGGT1_253440-t26_1-p1 1xPhospho [S134(100)]	11	High	0.000109821	9.56086e-05	1	1	TGGT1_253440-t26_1-p1	TGGT1_253440-t26_1-p1 [127-140]	0	1748.77	0.941	-0.09	1	41.8	44.4	36.92	38.26	26	31.6	55.5	55.3	38.8	21	57.8	50.9		High	7.761e-05	6.07e-05	3.06
95471	TGGT1_232080	hypothetical protein	transcript=TGGT1_232080-t26_1 | gene=TGGT1_232080 | organism=Toxoplasma_gondii_GT1 | gene_product=Chorein_N domain-containing protein [Source:UniProtKB/TrEMBL;Acc:S7WJ08] | transcript_product=hypothetical protein | location=TGGT1_chrVIII:1804634-1839298(-) | protein_length=10329 | sequence_SO=chromosome | SO=protein_coding_gene | is_pseudo=false	[R].SSGANASDYLPDAHQR.[T]	1xTMTpro [N-Term]; 1xPhospho [S7(100)]	TGGT1_232080-t26_1-p1 1xPhospho [S1401(100)]	7	High	1.10842e-06	9.56086e-05	1	1	TGGT1_232080-t26_1-p1	TGGT1_232080-t26_1-p1 [1395-1410]	0	2072.94	0.864	-0.21	1	44.7	51.8	38.47	41.46	68.6	57.3	34.9	29.9	70	80.7	34.1	38.2		High	7.761e-05	4.344e-07	4.34
26047	TGGT1_223610	hypothetical protein	transcript=TGGT1_223610-t26_1 | gene=TGGT1_223610 | organism=Toxoplasma_gondii_GT1 | gene_product=hypothetical protein | transcript_product=hypothetical protein | location=TGGT1_chrX:3601437-3606218(-) | protein_length=1303 | sequence_SO=chromosome | SO=protein_coding_gene | is_pseudo=false	[R].ELPEHPEELDKVSPNDVDTPSTPATR.[G]	1xTMTpro [K11]; 1xTMTpro [N-Term]; 1xPhospho [S13(100)]	TGGT1_223610-t26_1-p1 1xPhospho [S93(100)]	1	High	1.3632e-09	9.56086e-05	1	1	TGGT1_223610-t26_1-p1	TGGT1_223610-t26_1-p1 [81-106]	1	3561.76	1.058	0.08	1	65	61.4	14.88	7.46	NA	NA	72.2	58.5	NA	NA	64.8	58.3		High	7.761e-05	3.013e-10	6.91
26031	TGGT1_205300	hypothetical protein	transcript=TGGT1_205300-t26_1 | gene=TGGT1_205300 | organism=Toxoplasma_gondii_GT1 | gene_product=hypothetical protein | transcript_product=hypothetical protein | location=TGGT1_chrVIIa:1393031-1399070(-) | protein_length=697 | sequence_SO=chromosome | SO=protein_coding_gene | is_pseudo=false	[R].EINSHAANADPK.[S]	1xTMTpro [K12]; 1xTMTpro [N-Term]; 1xPhospho [S4(100)]	TGGT1_205300-t26_1-p1 1xPhospho [S424(100)]	2	High	5.73514e-05	9.56086e-05	1	1	TGGT1_205300-t26_1-p1	TGGT1_205300-t26_1-p1 [421-432]	0	1954.99	0.667	-0.58	1	30.5	45.7	40.02	32.88	24.2	16	41.6	38.3	35.7	32.3	58.5	62.9		High	7.761e-05	2.958e-05	3.67
95479	TGGT1_243430	OTU family cysteine protease	transcript=TGGT1_243430-t26_1 | gene=TGGT1_243430 | organism=Toxoplasma_gondii_GT1 | gene_product=OTU domain-containing protein [Source:UniProtKB/TrEMBL;Acc:S7UED7] | transcript_product=OTU family cysteine protease | location=TGGT1_chrVI:2539114-2545055(-) | protein_length=1395 | sequence_SO=chromosome | SO=protein_coding_gene | is_pseudo=false	[K].SSGASTPHAIDESGK.[G]	1xTMTpro [K15]; 1xTMTpro [N-Term]; 2xPhospho [S5(100); T6(100)]	TGGT1_243430-t26_1-p1 2xPhospho [S359(100); T360(100)]	2	High	9.80349e-05	9.56086e-05	1	1	TGGT1_243430-t26_1-p1	TGGT1_243430-t26_1-p1 [355-369]	0	2212.02	0.846	-0.24	1	25.9	30.6	19.2	8.03	29.6	22.6	NA	NA	32.4	28.9	NA	NA		High	0.0001044	5.764e-05	3.62
77955	TGGT1_202900	zinc finger (CCCH type) motif-containing protein	transcript=TGGT1_202900-t26_1 | gene=TGGT1_202900 | organism=Toxoplasma_gondii_GT1 | gene_product=Zinc finger (CCCH type) motif-containing protein [Source:UniProtKB/TrEMBL;Acc:S7UVM4] | transcript_product=zinc finger (CCCH type) motif-containing protein | location=TGGT1_chrVIIa:2849287-2853372(+) | protein_length=1298 | sequence_SO=chromosome | SO=protein_coding_gene | is_pseudo=false	[R].RLPASNDALETSANSTSQLRP.[-]	1xTMTpro [N-Term]; 1xPhospho [S5(100)]	TGGT1_202900-t26_1-p1 1xPhospho [S1282(100)]	2	High	1.06421e-07	9.56086e-05	1	1	TGGT1_202900-t26_1-p1	TGGT1_202900-t26_1-p1 [1278-1298]	1	2612.3	0.71	-0.49	0.595459	100.9	142.1	5.59	7.28	NA	NA	96.9	104.9	NA	NA	135	149.6		High	7.761e-05	3.308e-08	6.01
95517	TGGT1_246600	ABC1 family protein	transcript=TGGT1_246600-t26_1 | gene=TGGT1_246600 | organism=Toxoplasma_gondii_GT1 | gene_product=ABC1 family protein [Source:UniProtKB/TrEMBL;Acc:S7V0T4] | transcript_product=ABC1 family protein | location=TGGT1_chrXII:2806257-2812250(+) | protein_length=1900 | sequence_SO=chromosome | SO=protein_coding_gene | is_pseudo=false	[R].SSGEVDSDGVSPR.[E]	1xTMTpro [N-Term]; 1xPhospho [S7(100)]	TGGT1_246600-t26_1-p1 1xPhospho [S1445(100)]	3	High	9.10873e-05	9.56086e-05	1	1	TGGT1_246600-t26_1-p1	TGGT1_246600-t26_1-p1 [1439-1451]	0	1675.75	0.801	-0.32	1	31.9	39.8	14.66	16.39	NA	NA	35.4	28.7	NA	NA	44.7	35.4		High	7.761e-05	4.927e-05	3.55
26168	TGGT1_308890	transcription elongation factor SPT6	transcript=TGGT1_308890-t26_1 | gene=TGGT1_308890 | organism=Toxoplasma_gondii_GT1 | gene_product=Transcription elongation factor SPT6 [Source:UniProtKB/TrEMBL;Acc:S7W102] | transcript_product=transcription elongation factor SPT6 | location=TGGT1_chrXI:296965-314183(+) | protein_length=3132 | sequence_SO=chromosome | SO=protein_coding_gene | is_pseudo=false	[R].ELSDAEEATPVDDAYLGDVQEGEHR.[V]	1xTMTpro [N-Term]; 1xPhospho [S3(100)]	TGGT1_308890-t26_1-p1 1xPhospho [S914(100)]	1	High	5.47132e-08	9.56086e-05	1	1	TGGT1_308890-t26_1-p1	TGGT1_308890-t26_1-p1 [912-936]	0	3129.39	1.634	0.71	1	12	7.3	13.84	11.85	NA	NA	10.9	13.2	NA	NA	8	6.7		High	7.761e-05	1.613e-08	6.37
26002	TGGT1_306020	hypothetical protein	transcript=TGGT1_306020-t26_1 | gene=TGGT1_306020 | organism=Toxoplasma_gondii_GT1 | gene_product=hypothetical protein | transcript_product=hypothetical protein | location=TGGT1_chrIX:5506123-5536326(+) | protein_length=8858 | sequence_SO=chromosome | SO=protein_coding_gene | is_pseudo=false	[R].EIMDGAVTDIEK.[E]	1xOxidation [M3]; 1xTMTpro [K12]; 1xTMTpro [N-Term]; 1xPhospho [T8(100)]	TGGT1_306020-t26_1-p1 1xPhospho [T3571(100)]	1	High	9.25705e-06	9.56086e-05	1	1	TGGT1_306020-t26_1-p1	TGGT1_306020-t26_1-p1 [3564-3575]	0	2025.01	1.244	0.32	1	44.7	35.9	3	16.41	43.8	45.7	NA	NA	32	40.4	NA	NA		High	0.0001044	5.612e-06	3.73
54633	TGGT1_259650	hypothetical protein	transcript=TGGT1_259650-t26_1 | gene=TGGT1_259650 | organism=Toxoplasma_gondii_GT1 | gene_product=hypothetical protein | transcript_product=hypothetical protein | location=TGGT1_chrVIIb:2705567-2708069(+) | protein_length=397 | sequence_SO=chromosome | SO=protein_coding_gene | is_pseudo=false	[R].LEERESDGSSEDEEYLSR.[G]	1xTMTpro [N-Term]; 3xPhospho [S6(100); S9(100); S10(100)]	TGGT1_259650-t26_1-p1 3xPhospho [S50(100); S53(100); S54(100)]	8	High	2.46855e-06	9.56086e-05	1	1	TGGT1_259650-t26_1-p1	TGGT1_259650-t26_1-p1 [45-62]	1	2674.02	0.918	-0.12	1	37.3	40.6	79.26	70.24	82	83.3	16.9	13.9	87.2	78.8	20.9	19.9		High	0.0001044	1.552e-06	5.43
25992	TGGT1_286600	hypothetical protein	transcript=TGGT1_286600-t26_1 | gene=TGGT1_286600 | organism=Toxoplasma_gondii_GT1 | gene_product=hypothetical protein | transcript_product=hypothetical protein | location=TGGT1_chrV:1621096-1622773(-) | protein_length=388 | sequence_SO=chromosome | SO=protein_coding_gene | is_pseudo=false	[R].ELLYCTSPQGDSVSADFLR.[G]	1xMethylthio [C5]; 1xTMTpro [N-Term]; 1xPhospho [T/S/Y]	TGGT1_286600-t26_1-p1 1xMethylthio [C106]	4	High	1.00526e-05	9.56086e-05	1	1	TGGT1_286600-t26_1-p1	TGGT1_286600-t26_1-p1 [102-120]	0	2531.15	1.101	0.14	1	32.5	29.5	31.85	27.9	33.7	48.7	22.6	31.3	45.5	33.1	26.3	26.1		High	7.761e-05	4.912e-06	3.77
95542	TGGT1_261450	hypothetical protein	transcript=TGGT1_261450-t26_1 | gene=TGGT1_261450 | organism=Toxoplasma_gondii_GT1 | gene_product=hypothetical protein | transcript_product=hypothetical protein | location=TGGT1_chrVIIb:1712431-1719358(-) | protein_length=1112 | sequence_SO=chromosome | SO=protein_coding_gene | is_pseudo=false	[K].SSGGGSGGSSVQTENPGR.[D]	1xTMTpro [N-Term]; 1xPhospho [S/T]		6	High	3.4252e-08	9.56086e-05	1	1	TGGT1_261450-t26_1-p1	TGGT1_261450-t26_1-p1 [927-944]	0	2004.89	1.301	0.38	1	74.1	57	13.82	8.32	NA	NA	81.7	67.2	NA	NA	60.4	53.7		High	7.761e-05	9.739e-09	6.81
77949	TGGT1_273660	AP2 domain transcription factor AP2VIII-3	transcript=TGGT1_273660-t26_1 | gene=TGGT1_273660 | organism=Toxoplasma_gondii_GT1 | gene_product=AP2/ERF domain-containing protein [Source:UniProtKB/TrEMBL;Acc:S7WJU8] | transcript_product=AP2 domain transcription factor AP2VIII-3 | location=TGGT1_chrVIII:3323793-3331330(-) | protein_length=2084 | sequence_SO=chromosome | SO=protein_coding_gene | is_pseudo=false	[K].RLNSLPSEADASPR.[E]	1xTMTpro [N-Term]; 1xPhospho [S4(100)]	TGGT1_273660-t26_1-p1 1xPhospho [S1792(100)]	5	High	0.00011232	9.56086e-05	1	1	TGGT1_273660-t26_1-p1	TGGT1_273660-t26_1-p1 [1789-1802]	1	1896.95	1.212	0.28	1	60.9	50.2	24.12	30.85	39.1	55.8	70.2	66.5	42.7	34.9	59.1	70.2		High	7.761e-05	6.223e-05	3.48
77947	TGGT1_231790	hypothetical protein	transcript=TGGT1_231790-t26_1 | gene=TGGT1_231790 | organism=Toxoplasma_gondii_GT1 | gene_product=hypothetical protein | transcript_product=hypothetical protein | location=TGGT1_chrVIII:1532804-1536806(-) | protein_length=1232 | sequence_SO=chromosome | SO=protein_coding_gene | is_pseudo=false	[R].RLNSDDTPVPSTTHSDLFGVDANGQER.[D]	1xTMTpro [N-Term]; 1xPhospho [S4(100)]	TGGT1_231790-t26_1-p1 1xPhospho [S401(100)]	1	High	7.40222e-07	9.56086e-05	1	1	TGGT1_231790-t26_1-p1	TGGT1_231790-t26_1-p1 [398-424]	1	3312.55	0.891	-0.17	1	34.4	38.6	18.54	8.2	NA	NA	39.2	30.1	NA	NA	40.9	36.4		High	7.761e-05	2.677e-07	5.63
77923	TGGT1_228120	hypothetical protein	transcript=TGGT1_228120-t26_1 | gene=TGGT1_228120 | organism=Toxoplasma_gondii_GT1 | gene_product=hypothetical protein | transcript_product=hypothetical protein | location=TGGT1_chrX:469350-486422(+) | protein_length=3946 | sequence_SO=chromosome | SO=protein_coding_gene | is_pseudo=false	[R].RILSEDDATAGEEDGEETGEGK.[A]	1xTMTpro [K22]; 1xTMTpro [N-Term]; 2xPhospho [S4(100); T9(100)]	TGGT1_228120-t26_1-p1 2xPhospho [S3071(100); T3076(100)]	7	High	1.82833e-07	9.56086e-05	1	1	TGGT1_228120-t26_1-p1	TGGT1_228120-t26_1-p1 [3068-3089]	1	3076.35	0.77	-0.38	1	40.2	52.2	44.21	37.59	76.8	49.8	31.9	32.4	68	71.9	40	32.1		High	0.0001044	1.235e-07	6.02
95613	TGGT1_230190	hypothetical protein	transcript=TGGT1_230190-t26_1 | gene=TGGT1_230190 | organism=Toxoplasma_gondii_GT1 | gene_product=hypothetical protein | transcript_product=hypothetical protein | location=TGGT1_chrVIII:671191-672375(+) | protein_length=290 | sequence_SO=chromosome | SO=protein_coding_gene | is_pseudo=false	[R].SSGRSPTGPGAPELGTQEATAGTR.[A]	1xTMTpro [N-Term]; 1xPhospho [S/T]		2	High	7.6445e-05	9.56086e-05	1	1	TGGT1_230190-t26_1-p1	TGGT1_230190-t26_1-p1 [50-73]	1	2669.29	1.482	0.57	1	11.4	7.7	5.76	17.22	NA	NA	11.9	11	NA	NA	6.8	8.7		High	7.761e-05	4.053e-05	2.92
25958	TGGT1_321410	hypothetical protein	transcript=TGGT1_321410-t26_1 | gene=TGGT1_321410 | organism=Toxoplasma_gondii_GT1 | gene_product=hypothetical protein | transcript_product=hypothetical protein | location=TGGT1_chrIb:1833268-1845048(-) | protein_length=1923 | sequence_SO=chromosome | SO=protein_coding_gene | is_pseudo=false	[K].ELLFSEEETEVPAER.[L]	1xTMTpro [N-Term]; 1xPhospho [S5(100)]	TGGT1_321410-t26_1-p1 1xPhospho [S177(100)]	5	High	5.91122e-05	9.56086e-05	1	1	TGGT1_321410-t26_1-p1	TGGT1_321410-t26_1-p1 [173-187]	0	2162.02	0.945	-0.08	1	53.4	56.5	29.84	29.52	60.8	63.4	30.7	46.8	73	69.6	45.8	39.5		High	7.761e-05	3.059e-05	3.51
54654	TGGT1_221200B	CW-type Zinc Finger protein	transcript=TGGT1_221200B-t26_1 | gene=TGGT1_221200B | organism=Toxoplasma_gondii_GT1 | gene_product=CW-type Zinc Finger protein [Source:UniProtKB/TrEMBL;Acc:S7W0D8] | transcript_product=CW-type Zinc Finger protein | location=TGGT1_chrII:103063-106965(-) | protein_length=1300 | sequence_SO=chromosome | SO=protein_coding_gene | is_pseudo=false	[K].LEETEEEDLALPSSHTAR.[K]	1xTMTpro [N-Term]; 1xPhospho [T4(100)]	TGGT1_221200B-t26_1-p1 1xPhospho [T272(100)]	5	High	4.51011e-05	9.56086e-05	1	1	TGGT1_221200B-t26_1-p1	TGGT1_221200B-t26_1-p1 [269-286]	0	2411.13	0.784	-0.35	1	6.6	8.5	38.6	56.67	NA	NA	8.8	5	NA	NA	12.9	5.5		High	7.761e-05	2.275e-05	3.9
95625	TGGT1_249390	glutamate/leucine/phenylalanine/valine dehydrogenase family protein	transcript=TGGT1_249390-t26_1 | gene=TGGT1_249390 | organism=Toxoplasma_gondii_GT1 | gene_product=ELFV_dehydrog domain-containing protein [Source:UniProtKB/TrEMBL;Acc:S7W941] | transcript_product=glutamate/leucine/phenylalanine/valine dehydrogenase family protein | location=TGGT1_chrXII:4441593-4452115(+) | protein_length=1206 | sequence_SO=chromosome | SO=protein_coding_gene | is_pseudo=false	[R].SSGSFFDDPADENER.[L]	1xTMTpro [N-Term]; 1xPhospho [S4(100)]	TGGT1_249390-t26_1-p1 1xPhospho [S318(100)]	7	High	8.47137e-05	9.56086e-05	1	1	TGGT1_249390-t26_1-p1	TGGT1_249390-t26_1-p1 [315-329]	0	2056.85	1.1	0.14	1	30.9	28.1	2.87	14.94	NA	NA	30.3	31.5	NA	NA	25.2	31.2		High	7.761e-05	4.541e-05	3.29
25938	TGGT1_225500	hypothetical protein	transcript=TGGT1_225500-t26_1 | gene=TGGT1_225500 | organism=Toxoplasma_gondii_GT1 | gene_product=hypothetical protein | transcript_product=hypothetical protein | location=TGGT1_chrX:2113345-2116023(+) | protein_length=430 | sequence_SO=chromosome | SO=protein_coding_gene | is_pseudo=false	[R].ELHVASFVGDGNAR.[E]	1xTMTpro [N-Term]; 1xPhospho [S6(100)]	TGGT1_225500-t26_1-p1 1xPhospho [S380(100)]	2	High	3.52184e-05	9.56086e-05	1	1	TGGT1_225500-t26_1-p1	TGGT1_225500-t26_1-p1 [375-388]	0	1855.9	1.198	0.26	1	29.7	24.8	35.71	33.96	35.1	47.7	22	25.1	31.6	36.1	18	19.5		High	7.761e-05	1.738e-05	3.53
95627	TGGT1_244460	hypothetical protein	transcript=TGGT1_244460-t26_1 | gene=TGGT1_244460 | organism=Toxoplasma_gondii_GT1 | gene_product=hypothetical protein | transcript_product=hypothetical protein | location=TGGT1_chrVI:3193064-3199038(-) | protein_length=1239 | sequence_SO=chromosome | SO=protein_coding_gene | is_pseudo=false	[R].SSGSGAGGGGASAAAR.[K]	1xTMTpro [N-Term]; 1xPhospho [S4(99.7)]	TGGT1_244460-t26_1-p1 1xPhospho [S918(99.7)]	5	High	4.45955e-05	9.56086e-05	1	1	TGGT1_244460-t26_1-p1	TGGT1_244460-t26_1-p1 [915-930]	0	1604.73	0.768	-0.38	1	14.2	18.5	4.71	9.52	NA	NA	14.7	13.7	NA	NA	17.3	19.8		High	7.761e-05	2.244e-05	3.84
77882	TGGT1_209850	RNA recognition motif-containing protein	transcript=TGGT1_209850-t26_1 | gene=TGGT1_209850 | organism=Toxoplasma_gondii_GT1 | gene_product=RNA recognition motif-containing protein [Source:UniProtKB/TrEMBL;Acc:S7UJA3] | transcript_product=RNA recognition motif-containing protein | location=TGGT1_chrIb:1501964-1507671(-) | protein_length=1412 | sequence_SO=chromosome | SO=protein_coding_gene | is_pseudo=false	[R].RLGSNPNFIPMGGASGPPR.[R]	1xTMTpro [N-Term]; 1xPhospho [S4(100)]	TGGT1_209850-t26_1-p1 1xPhospho [S308(100)]	1	High	3.65899e-06	9.56086e-05	1	1	TGGT1_209850-t26_1-p1	TGGT1_209850-t26_1-p1 [305-323]	1	2309.15	0.87	-0.2	1	26.9	31	9.57	13.29	NA	NA	25.2	28.8	NA	NA	34	28.2		High	7.761e-05	1.499e-06	4.9
54631	TGGT1_275490	hypothetical protein	transcript=TGGT1_275490-t26_1 | gene=TGGT1_275490 | organism=Toxoplasma_gondii_GT1 | gene_product=hypothetical protein | transcript_product=hypothetical protein | location=TGGT1_chrX:7191250-7202951(-) | protein_length=1999 | sequence_SO=chromosome | SO=protein_coding_gene | is_pseudo=false	[R].LEEQQGEGPDFGDSERR.[V]	1xTMTpro [N-Term]; 1xPhospho [S14(100)]	TGGT1_275490-t26_1-p1 1xPhospho [S1882(100)]	15	High	2.24645e-06	9.56086e-05	1	1	TGGT1_275490-t26_1-p1	TGGT1_275490-t26_1-p1 [1869-1885]	1	2333.04	0.852	-0.23	1	78.2	91.8	27.6	10.19	69.3	47.4	92.2	88.3	97.5	85.5	86.4	105.4		High	7.761e-05	8.868e-07	4.28
95359	TGGT1_201790	FHA domain-containing protein	transcript=TGGT1_201790-t26_1 | gene=TGGT1_201790 | organism=Toxoplasma_gondii_GT1 | gene_product=FHA domain-containing protein [Source:UniProtKB/TrEMBL;Acc:S7UV44] | transcript_product=FHA domain-containing protein | location=TGGT1_chrVIIa:3683201-3688810(-) | protein_length=556 | sequence_SO=chromosome | SO=protein_coding_gene | is_pseudo=false	[R].SSFGETPGSCEPPSSRESQSRDEDAFNAK.[L]	1xMethylthio [C10]; 1xTMTpro [K29]; 1xTMTpro [N-Term]; 1xPhospho [S/T]	TGGT1_201790-t26_1-p1 1xMethylthio [C122]	2	High	9.42651e-06	9.56086e-05	1	1	TGGT1_201790-t26_1-p1	TGGT1_201790-t26_1-p1 [113-141]	2	3836.7	0.903	-0.15	1	86.5	95.8	0.68	5.96	NA	NA	86.1	86.9	NA	NA	99.9	91.8		High	7.761e-05	4.169e-06	4.28
26334	TGGT1_243460	hypothetical protein	transcript=TGGT1_243460-t26_1 | gene=TGGT1_243460 | organism=Toxoplasma_gondii_GT1 | gene_product=hypothetical protein | transcript_product=hypothetical protein | location=TGGT1_chrVI:2564580-2571836(-) | protein_length=2011 | sequence_SO=chromosome | SO=protein_coding_gene | is_pseudo=false	[R].ELVTQEDSKTSPDEEK.[E]	2xTMTpro [K9; K16]; 1xTMTpro [N-Term]; 1xPhospho [T10(99.7)]	TGGT1_243460-t26_1-p1 1xPhospho [T1984(99.7)]	2	High	8.63016e-05	9.56086e-05	1	1	TGGT1_243460-t26_1-p1	TGGT1_243460-t26_1-p1 [1975-1990]	1	2827.44	1.162	0.22	1	61.5	52.9	13.79	6.4	NA	NA	67.8	55.8	NA	NA	50.6	55.4		High	7.761e-05	4.639e-05	3.67
95146	TGGT1_288350	hypothetical protein	transcript=TGGT1_288350-t26_1 | gene=TGGT1_288350 | organism=Toxoplasma_gondii_GT1 | gene_product=Nkap_C domain-containing protein [Source:UniProtKB/TrEMBL;Acc:S7UPG1] | transcript_product=hypothetical protein | location=TGGT1_chrIX:2274573-2280483(-) | protein_length=1053 | sequence_SO=chromosome | SO=protein_coding_gene | is_pseudo=false	[R].SSDSHSAPR.[K]	1xTMTpro [N-Term]; 1xPhospho [S6(100)]	TGGT1_288350-t26_1-p1 1xPhospho [S12(100)]	6	High	0.000136808	9.56086e-05	1	1	TGGT1_288350-t26_1-p1	TGGT1_288350-t26_1-p1 [7-15]	0	1327.6	1.098	0.13	1	24.3	22.2	15.91	0.19	NA	NA	27.2	21.7	NA	NA	22.2	22.1		High	7.761e-05	7.763e-05	3.46
54540	TGGT1_205558	NAC domain-containing protein	transcript=TGGT1_205558-t26_1 | gene=TGGT1_205558 | organism=Toxoplasma_gondii_GT1 | gene_product=NAC-A/B domain-containing protein [Source:UniProtKB/TrEMBL;Acc:S7W330] | transcript_product=NAC domain-containing protein | location=TGGT1_chrVIIa:1246583-1248351(+) | protein_length=189 | sequence_SO=chromosome | SO=protein_coding_gene | is_pseudo=false	[K].IEDLNSQAHSAAAQR.[F]	1xTMTpro [N-Term]; 1xPhospho [S10(100)]	TGGT1_205558-t26_1-p1 1xPhospho [S112(100)]	7	High	1.98108e-06	9.56086e-05	1	1	TGGT1_205558-t26_1-p1	TGGT1_205558-t26_1-p1 [103-117]	0	1994.96	0.826	-0.28	1	68.1	82.5	22.09	11.24	70.8	88.5	65.6	51.6	87.7	91.1	71.1	77.6		High	0.0001044	1.252e-06	3.18
95179	TGGT1_235470	myosin A	transcript=TGGT1_235470-t26_1 | gene=TGGT1_235470 | organism=Toxoplasma_gondii_GT1 | gene_product=Myosin motor domain-containing protein [Source:UniProtKB/TrEMBL;Acc:S7W634] | transcript_product=myosin A | location=TGGT1_chrX:4773284-4778894(+) | protein_length=831 | sequence_SO=chromosome | SO=protein_coding_gene | is_pseudo=false	[R].SSDVHAVDHSGNVYK.[G]	1xTMTpro [K15]; 1xTMTpro [N-Term]; 1xPhospho [S/Y]		40	High	5.57463e-09	9.56086e-05	1	1	TGGT1_235470-t26_1-p1	TGGT1_235470-t26_1-p1 [20-34]	0	2303.13	0.832	-0.27	1	474.4	570.2	91.38	88.65	166.2	172.1	1307.7	1514.6	220.6	185.5	1592.4	1473.6		High	7.761e-05	1.375e-09	6.82
54543	TGGT1_205320	hypothetical protein	transcript=TGGT1_205320-t26_1 | gene=TGGT1_205320 | organism=Toxoplasma_gondii_GT1 | gene_product=hypothetical protein | transcript_product=hypothetical protein | location=TGGT1_chrVIIa:1385667-1389087(+) | protein_length=739 | sequence_SO=chromosome | SO=protein_coding_gene | is_pseudo=false	[K].IEDNSEATSPQEGK.[G]	1xTMTpro [K14]; 1xTMTpro [N-Term]; 1xPhospho [T/S]		4	High	3.13301e-05	9.56086e-05	1	1	TGGT1_205320-t26_1-p1	TGGT1_205320-t26_1-p1 [67-80]	0	2193.06	1.066	0.09	1	17.6	16.5	52.41	32.23	20.6	37.5	15	12.6	24.6	19.5	12.1	13.9		High	0.0001044	1.849e-05	3.16
26276	TGGT1_249550	hypothetical protein	transcript=TGGT1_249550-t26_1 | gene=TGGT1_249550 | organism=Toxoplasma_gondii_GT1 | gene_product=hypothetical protein | transcript_product=hypothetical protein | location=TGGT1_chrXII:4556908-4566751(+) | protein_length=1813 | sequence_SO=chromosome | SO=protein_coding_gene | is_pseudo=false	[R].ELTNSPSTQAYR.[R]	1xTMTpro [N-Term]; 1xPhospho [T3(100)]	TGGT1_249550-t26_1-p1 1xPhospho [T719(100)]	3	High	0.000146758	9.56086e-05	1	1	TGGT1_249550-t26_1-p1	TGGT1_249550-t26_1-p1 [717-728]	0	1750.83	1.017	0.02	1	9.1	8.9	34.32	34.7	NA	NA	7.1	11.6	NA	NA	6.9	11.5		High	7.761e-05	8.414e-05	3.32
54545	TGGT1_205320	hypothetical protein	transcript=TGGT1_205320-t26_1 | gene=TGGT1_205320 | organism=Toxoplasma_gondii_GT1 | gene_product=hypothetical protein | transcript_product=hypothetical protein | location=TGGT1_chrVIIa:1385667-1389087(+) | protein_length=739 | sequence_SO=chromosome | SO=protein_coding_gene | is_pseudo=false	[K].IEDNSEATSPQEGKGSEHEGGADAPASEAEAK.[G]	2xTMTpro [K14; K32]; 1xTMTpro [N-Term]; 1xPhospho [S9(99.4)]	TGGT1_205320-t26_1-p1 1xPhospho [S75(99.4)]	2	High	1.21085e-07	9.56086e-05	1	1	TGGT1_205320-t26_1-p1	TGGT1_205320-t26_1-p1 [67-98]	1	4190.98	1.043	0.06	1	33.7	32.3	6.15	2.63	NA	NA	35.2	32.3	NA	NA	32.9	31.7		High	7.761e-05	3.799e-08	5.63
54546	TGGT1_205320	hypothetical protein	transcript=TGGT1_205320-t26_1 | gene=TGGT1_205320 | organism=Toxoplasma_gondii_GT1 | gene_product=hypothetical protein | transcript_product=hypothetical protein | location=TGGT1_chrVIIa:1385667-1389087(+) | protein_length=739 | sequence_SO=chromosome | SO=protein_coding_gene | is_pseudo=false	[K].IEDNSEATSPQEGKGSEHEGGADAPASEAEAK.[G]	2xTMTpro [K14; K32]; 1xTMTpro [N-Term]; 2xPhospho [S27(100); S/T]	TGGT1_205320-t26_1-p1 2xPhospho [S93(100); S/T]	3	High	7.76484e-05	9.56086e-05	1	1	TGGT1_205320-t26_1-p1	TGGT1_205320-t26_1-p1 [67-98]	1	4270.95	1.087	0.12	1	17.1	15.7	23.35	6	NA	NA	14.4	20.2	NA	NA	15	16.4		High	7.761e-05	4.13e-05	3.64
54547	TGGT1_205320	hypothetical protein	transcript=TGGT1_205320-t26_1 | gene=TGGT1_205320 | organism=Toxoplasma_gondii_GT1 | gene_product=hypothetical protein | transcript_product=hypothetical protein | location=TGGT1_chrVIIa:1385667-1389087(+) | protein_length=739 | sequence_SO=chromosome | SO=protein_coding_gene | is_pseudo=false	[K].IEDNSEATSPQEGKGSEHEGGADAPASEAEAK.[G]	2xTMTpro [K14; K32]; 1xTMTpro [N-Term]; 3xPhospho [S5(100); T8(99.1); S9(99.1)]	TGGT1_205320-t26_1-p1 3xPhospho [S71(100); T74(99.1); S75(99.1)]	2	High	2.92591e-05	9.56086e-05	1	1	TGGT1_205320-t26_1-p1	TGGT1_205320-t26_1-p1 [67-98]	1	4350.91	1.315	0.4	1	22.4	17.1	33.89	8.69	NA	NA	28.6	17.6	NA	NA	16	18.1		High	7.761e-05	1.419e-05	4.18
26268	TGGT1_311230	hypothetical protein	transcript=TGGT1_311230-t26_1 | gene=TGGT1_311230 | organism=Toxoplasma_gondii_GT1 | gene_product=hypothetical protein | transcript_product=hypothetical protein | location=TGGT1_chrXI:1844321-1862670(+) | protein_length=4603 | sequence_SO=chromosome | SO=protein_coding_gene | is_pseudo=false	[R].ELTHASPSEDPSQTAR.[R]	1xTMTpro [N-Term]; 1xPhospho [S6(100)]	TGGT1_311230-t26_1-p1 1xPhospho [S4230(100)]	7	High	0.000105604	9.56086e-05	1	1	TGGT1_311230-t26_1-p1	TGGT1_311230-t26_1-p1 [4225-4240]	0	2109.98	1.095	0.13	1	33.3	30.4	9.43	33.94	37.3	33.5	33.1	29.6	33.4	42.3	27.7	17.8		High	7.761e-05	5.805e-05	3.08
77967	TGGT1_275740	hypothetical protein	transcript=TGGT1_275740-t26_1 | gene=TGGT1_275740 | organism=Toxoplasma_gondii_GT1 | gene_product=hypothetical protein | transcript_product=hypothetical protein | location=TGGT1_chrIII:240424-247727(+) | protein_length=1362 | sequence_SO=chromosome | SO=protein_coding_gene | is_pseudo=false	[R].RLPGEDATASPNAEVESEATDVR.[C]	1xTMTpro [N-Term]; 1xPhospho [S10(100)]	TGGT1_275740-t26_1-p1 1xPhospho [S292(100)]	6	High	4.19154e-08	9.56086e-05	1	1	TGGT1_275740-t26_1-p1	TGGT1_275740-t26_1-p1 [283-305]	1	2798.32	1.147	0.2	1	34.8	30.3	31.32	35.42	22.6	28.8	45.8	42	18.1	25.1	36.6	41.8		High	7.761e-05	1.211e-08	5.98
54552	TGGT1_218560	acetyl-coA carboxylase ACC2	transcript=TGGT1_218560-t26_1 | gene=TGGT1_218560 | organism=Toxoplasma_gondii_GT1 | gene_product=Acetyl-coA carboxylase ACC2 [Source:UniProtKB/TrEMBL;Acc:S7V1W6] | transcript_product=acetyl-coA carboxylase ACC2 | location=TGGT1_chrXII:1367542-1396474(-) | protein_length=3400 | sequence_SO=chromosome | SO=protein_coding_gene | is_pseudo=false	[K].LEDQDTTPGTPDGAPAR.[S]	1xTMTpro [N-Term]; 1xPhospho [T10(100)]	TGGT1_218560-t26_1-p1 1xPhospho [T1108(100)]	11	High	1.33188e-06	9.56086e-05	1	1	TGGT1_218560-t26_1-p1	TGGT1_218560-t26_1-p1 [1099-1115]	0	2124.98	1.18	0.24	1	43.9	37.2	15.23	17.02	46.2	50.7	35.2	41.8	49.5	34.4	37.4	37		High	7.761e-05	5.044e-07	4.98
26258	TGGT1_288380	heat shock protein HSP90	transcript=TGGT1_288380-t26_1 | gene=TGGT1_288380 | organism=Toxoplasma_gondii_GT1 | gene_product=HATPase_c domain-containing protein [Source:UniProtKB/TrEMBL;Acc:A0A125YVB6] | transcript_product=heat shock protein HSP90 | location=TGGT1_chrIX:2294323-2298742(+) | protein_length=708 | sequence_SO=chromosome | SO=protein_coding_gene | is_pseudo=false	[K].EITESEDEEKPAEDAEEK.[K]	2xTMTpro [K10; K18]; 1xTMTpro [N-Term]; 1xPhospho [T3(100)]	TGGT1_288380-t26_1-p1 1xPhospho [T220(100)]	18	High	5.68844e-06	9.56086e-05	1	1	TGGT1_288380-t26_1-p1	TGGT1_288380-t26_1-p1 [218-235]	0	3070.48	1.329	0.41	1	162.9	122.6	57.36	68.64	98.4	87.8	269.7	282.8	50.6	67.4	222.9	237.5		High	7.761e-05	2.414e-06	5.29
78035	TGGT1_234900	PHD-finger domain-containing protein	transcript=TGGT1_234900-t26_1 | gene=TGGT1_234900 | organism=Toxoplasma_gondii_GT1 | gene_product=PHD-finger domain-containing protein [Source:UniProtKB/TrEMBL;Acc:S7UVJ2] | transcript_product=PHD-finger domain-containing protein | location=TGGT1_chrX:4428067-4444742(+) | protein_length=4608 | sequence_SO=chromosome | SO=protein_coding_gene | is_pseudo=false	[R].RLSAPSGGTMETR.[C]	1xTMTpro [N-Term]; 1xPhospho [S3(100)]	TGGT1_234900-t26_1-p1 1xPhospho [S3560(100)]	2	High	6.6889e-05	9.56086e-05	1	1	TGGT1_234900-t26_1-p1	TGGT1_234900-t26_1-p1 [3558-3570]	1	1746.85	1.11	0.15	1	73.3	66	13.29	11.12	66.7	80.5	NA	NA	71.4	61	NA	NA		High	0.0001044	3.918e-05	3.35
95198	TGGT1_227000	hypothetical protein	transcript=TGGT1_227000-t26_1 | gene=TGGT1_227000 | organism=Toxoplasma_gondii_GT1 | gene_product=hypothetical protein | transcript_product=hypothetical protein | location=TGGT1_chrX:1052036-1062406(+) | protein_length=1082 | sequence_SO=chromosome | SO=protein_coding_gene | is_pseudo=false	[R].SSEARPVSPLAVSLEVK.[A]	1xTMTpro [K17]; 1xTMTpro [N-Term]; 1xPhospho [S8(100)]	TGGT1_227000-t26_1-p1 1xPhospho [S832(100)]	2	High	2.96106e-06	9.56086e-05	1	1	TGGT1_227000-t26_1-p1	TGGT1_227000-t26_1-p1 [825-841]	0	2457.36	0.948	-0.08	1	177.8	187.6	2.53	0.4	NA	NA	174.6	181	NA	NA	188.1	187.1		High	7.761e-05	1.195e-06	5.34
78034	TGGT1_277740	zinc finger, C3HC4 type (RING finger) domain-containing protein	transcript=TGGT1_277740-t26_1 | gene=TGGT1_277740 | organism=Toxoplasma_gondii_GT1 | gene_product=RING-type domain-containing protein [Source:UniProtKB/TrEMBL;Acc:S7UZY7] | transcript_product=zinc finger, C3HC4 type (RING finger) domain-containing protein | location=TGGT1_chrXII:6456692-6463192(-) | protein_length=1744 | sequence_SO=chromosome | SO=protein_coding_gene | is_pseudo=false	[R].RLSAGPGSSISGTLR.[S]	1xTMTpro [N-Term]; 1xPhospho [S3(100)]	TGGT1_277740-t26_1-p1 1xPhospho [S291(100)]	3	High	7.04591e-05	9.56086e-05	1	1	TGGT1_277740-t26_1-p1	TGGT1_277740-t26_1-p1 [289-303]	1	1842.98	1.095	0.13	1	56.8	51.9	37.23	37.76	38.3	43.9	73.5	84.1	39.6	40.7	84.9	66.2		High	7.761e-05	3.709e-05	3.82
78031	TGGT1_277710	hypothetical protein	transcript=TGGT1_277710-t26_1 | gene=TGGT1_277710 | organism=Toxoplasma_gondii_GT1 | gene_product=hypothetical protein | transcript_product=hypothetical protein | location=TGGT1_chrXII:6471362-6477231(-) | protein_length=703 | sequence_SO=chromosome | SO=protein_coding_gene | is_pseudo=false	[K].RLSAEQGADPAEADVAR.[R]	1xTMTpro [N-Term]; 1xPhospho [S3(100)]	TGGT1_277710-t26_1-p1 1xPhospho [S140(100)]	17	High	2.16454e-07	9.56086e-05	1	1	TGGT1_277710-t26_1-p1	TGGT1_277710-t26_1-p1 [138-154]	1	2140.04	1.057	0.08	1	170.1	160.8	13.84	13.78	172.8	217.6	164.3	167.4	160.3	195.4	161.3	140.9		High	7.761e-05	7.109e-08	4.8
54578	TGGT1_251630	slc30a2 protein	transcript=TGGT1_251630-t26_1 | gene=TGGT1_251630 | organism=Toxoplasma_gondii_GT1 | gene_product=Slc30a2 protein [Source:UniProtKB/TrEMBL;Acc:S7V0D3] | transcript_product=slc30a2 protein | location=TGGT1_chrXII:5421720-5427109(+) | protein_length=896 | sequence_SO=chromosome | SO=protein_coding_gene | is_pseudo=false	[R].LEEDMDSERNYENMNLR.[A]	1xTMTpro [N-Term]; 1xPhospho [S7(100)]	TGGT1_251630-t26_1-p1 1xPhospho [S724(100)]	7	High	2.23903e-06	9.56086e-05	1	1	TGGT1_251630-t26_1-p1	TGGT1_251630-t26_1-p1 [718-734]	1	2542.09	0.963	-0.05	1	122.6	127.3	55.62	49.61	77.6	71.9	226.1	193.6	84.2	75	192.3	204.9		High	0.0001044	1.41e-06	3.82
95226	TGGT1_205300	hypothetical protein	transcript=TGGT1_205300-t26_1 | gene=TGGT1_205300 | organism=Toxoplasma_gondii_GT1 | gene_product=hypothetical protein | transcript_product=hypothetical protein | location=TGGT1_chrVIIa:1393031-1399070(-) | protein_length=697 | sequence_SO=chromosome | SO=protein_coding_gene | is_pseudo=false	[K].SSEEEKGSGFADSSPGAVR.[L]	1xTMTpro [K6]; 1xTMTpro [N-Term]; 1xPhospho [S8(100)]	TGGT1_205300-t26_1-p1 1xPhospho [S440(100)]	5	High	4.07434e-05	9.56086e-05	1	1	TGGT1_205300-t26_1-p1	TGGT1_205300-t26_1-p1 [433-451]	1	2585.24	1.045	0.06	1	46.4	44.3	70.09	69.62	22.7	23	93.3	93.8	23.9	20.1	82.2	92.9		High	7.761e-05	2.035e-05	3.76
95242	TGGT1_288530	NOL1/NOP2/sun family protein	transcript=TGGT1_288530-t26_1 | gene=TGGT1_288530 | organism=Toxoplasma_gondii_GT1 | gene_product=SAM_MT_RSMB_NOP domain-containing protein [Source:UniProtKB/TrEMBL;Acc:A0A125YRB9] | transcript_product=NOL1/NOP2/sun family protein | location=TGGT1_chrIX:2409169-2414972(+) | protein_length=804 | sequence_SO=chromosome | SO=protein_coding_gene | is_pseudo=false	[R].SSEGSSPVSPK.[Q]	1xTMTpro [K11]; 1xTMTpro [N-Term]; 1xPhospho [S9(100)]	TGGT1_288530-t26_1-p1 1xPhospho [S710(100)]	4	High	8.08591e-05	9.56086e-05	1	1	TGGT1_288530-t26_1-p1	TGGT1_288530-t26_1-p1 [702-712]	0	1749.89	1.143	0.19	1	62.8	54.9	80.59	82.86	143.8	137.6	21.7	28.6	130.8	133.7	20.5	23.1		High	0.0001044	4.743e-05	3.85
54579	TGGT1_251630	slc30a2 protein	transcript=TGGT1_251630-t26_1 | gene=TGGT1_251630 | organism=Toxoplasma_gondii_GT1 | gene_product=Slc30a2 protein [Source:UniProtKB/TrEMBL;Acc:S7V0D3] | transcript_product=slc30a2 protein | location=TGGT1_chrXII:5421720-5427109(+) | protein_length=896 | sequence_SO=chromosome | SO=protein_coding_gene | is_pseudo=false	[R].LEEDMDSERNYENMNLR.[A]	1xOxidation [M]; 1xTMTpro [N-Term]; 1xPhospho [S7(100)]	TGGT1_251630-t26_1-p1 1xPhospho [S724(100)]	6	High	8.91452e-05	9.56086e-05	1	1	TGGT1_251630-t26_1-p1	TGGT1_251630-t26_1-p1 [718-734]	1	2558.09	0.888	-0.17	1	51.4	57.9	18.79	24.64	51	51.7	43.6	67.4	54.9	35	64.9	61		High	0.0001044	5.236e-05	2.48
77981	TGGT1_220510	hypothetical protein	transcript=TGGT1_220510-t26_1 | gene=TGGT1_220510 | organism=Toxoplasma_gondii_GT1 | gene_product=hypothetical protein | transcript_product=hypothetical protein | location=TGGT1_chrV:328785-330623(+) | protein_length=612 | sequence_SO=chromosome | SO=protein_coding_gene | is_pseudo=false	[R].RLPSGPPPSPSAVLPSATEVR.[A]	1xTMTpro [N-Term]; 1xPhospho [S4(100)]	TGGT1_220510-t26_1-p1 1xPhospho [S298(100)]	2	High	0.000115725	9.56086e-05	1	1	TGGT1_220510-t26_1-p1	TGGT1_220510-t26_1-p1 [295-315]	1	2499.33	1.142	0.19	1	82.7	72.5	1.3	2.8	NA	NA	82	83.5	NA	NA	71	73.9		High	7.761e-05	6.436e-05	3.23
26198	TGGT1_210430	DnaJ domain-containing protein	transcript=TGGT1_210430-t26_1 | gene=TGGT1_210430 | organism=Toxoplasma_gondii_GT1 | gene_product=J domain-containing protein [Source:UniProtKB/TrEMBL;Acc:S7VXA8] | transcript_product=DnaJ domain-containing protein | location=TGGT1_chrIX:4589516-4598135(-) | protein_length=2010 | sequence_SO=chromosome | SO=protein_coding_gene | is_pseudo=false	[R].ELSLSAETEGGAPPQGGER.[A]	1xTMTpro [N-Term]; 1xPhospho [S3(100)]	TGGT1_210430-t26_1-p1 1xPhospho [S599(100)]	9	High	1.0221e-06	9.56086e-05	1	1	TGGT1_210430-t26_1-p1	TGGT1_210430-t26_1-p1 [597-615]	0	2269.07	1.09	0.12	1	50.3	46.1	34	27.62	32.1	39.5	64	66	35.7	40	65.2	53.3		High	7.761e-05	3.791e-07	5.91
26259	TGGT1_288380	heat shock protein HSP90	transcript=TGGT1_288380-t26_1 | gene=TGGT1_288380 | organism=Toxoplasma_gondii_GT1 | gene_product=HATPase_c domain-containing protein [Source:UniProtKB/TrEMBL;Acc:A0A125YVB6] | transcript_product=heat shock protein HSP90 | location=TGGT1_chrIX:2294323-2298742(+) | protein_length=708 | sequence_SO=chromosome | SO=protein_coding_gene | is_pseudo=false	[K].EITESEDEEKPAEDAEEK.[K]	2xTMTpro [K10; K18]; 1xTMTpro [N-Term]; 2xPhospho [T3(100); S5(100)]	TGGT1_288380-t26_1-p1 2xPhospho [T220(100); S222(100)]	46	High	6.32268e-06	9.56086e-05	1	1	TGGT1_288380-t26_1-p1	TGGT1_288380-t26_1-p1 [218-235]	0	3150.45	1.03	0.04	1	372	361.1	25.24	28.52	474.4	458.1	296.7	302	479.7	437.2	262.3	298.3		High	7.761e-05	2.707e-06	5.47
25923	TGGT1_248190	hypothetical protein	transcript=TGGT1_248190-t26_1 | gene=TGGT1_248190 | organism=Toxoplasma_gondii_GT1 | gene_product=hypothetical protein | transcript_product=hypothetical protein | location=TGGT1_chrXII:3664383-3669489(+) | protein_length=962 | sequence_SO=chromosome | SO=protein_coding_gene | is_pseudo=false	[R].ELHAPANGEADAPSPR.[T]	1xTMTpro [N-Term]; 1xPhospho [S14(100)]	TGGT1_248190-t26_1-p1 1xPhospho [S900(100)]	8	High	1.57672e-06	9.56086e-05	1	1	TGGT1_248190-t26_1-p1	TGGT1_248190-t26_1-p1 [887-902]	0	2015.95	1.149	0.2	1	50.5	44	3.84	6.76	NA	NA	49.2	51.9	NA	NA	41.9	46.1		High	7.761e-05	6.051e-07	5
94834	TGGT1_229640	hypothetical protein	transcript=TGGT1_229640-t26_1 | gene=TGGT1_229640 | organism=Toxoplasma_gondii_GT1 | gene_product=hypothetical protein | transcript_product=hypothetical protein | location=TGGT1_chrVIII:347644-355417(+) | protein_length=1289 | sequence_SO=chromosome | SO=protein_coding_gene | is_pseudo=false	[K].SSARENDLHAEGVDLVAVYK.[A]	1xTMTpro [K20]; 1xTMTpro [N-Term]; 1xPhospho [S/Y]		1	High	4.53612e-06	9.56086e-05	1	1	TGGT1_229640-t26_1-p1	TGGT1_229640-t26_1-p1 [817-836]	1	2861.47	0.86	-0.22	1	40.1	46.6	13.4	4.11	NA	NA	44.1	36.4	NA	NA	47.9	45.2		High	7.761e-05	1.892e-06	5.03
94775	TGGT1_240300	zinc finger domain, LSD1 subclass domain-containing protein	transcript=TGGT1_240300-t26_1 | gene=TGGT1_240300 | organism=Toxoplasma_gondii_GT1 | gene_product=Zinc finger domain, LSD1 subclass domain-containing protein [Source:UniProtKB/TrEMBL;Acc:S7UR66] | transcript_product=zinc finger domain, LSD1 subclass domain-containing protein | location=TGGT1_chrVI:1149431-1153539(+) | protein_length=1059 | sequence_SO=chromosome | SO=protein_coding_gene | is_pseu…	[R].SSAGYDSEDRR.[C]	1xTMTpro [N-Term]; 1xPhospho [S7(100)]	TGGT1_240300-t26_1-p1 1xPhospho [S158(100)]	10	High	0.000125354	9.56086e-05	1	1	TGGT1_240300-t26_1-p1	TGGT1_240300-t26_1-p1 [152-162]	1	1626.71	0.96	-0.06	1	69.5	72.5	52.4	45.67	43	45.5	124.7	106.3	46.3	48.8	107.7	111.5		High	7.761e-05	7.04e-05	3.55
94263	TGGT1_293000	3'5'-cyclic nucleotide phosphodiesterase domain-containing protein	transcript=TGGT1_293000-t26_1 | gene=TGGT1_293000 | organism=Toxoplasma_gondii_GT1 | gene_product=Phosphodiesterase [Source:UniProtKB/TrEMBL;Acc:S7UHU3] | transcript_product=3'5'-cyclic nucleotide phosphodiesterase domain-containing protein | location=TGGT1_chrIa:58977-74026(+) | protein_length=2238 | sequence_SO=chromosome | SO=protein_coding_gene | is_pseudo=false	[R].SRSPASGGALALGVDSEETAPAGAAR.[R]	1xTMTpro [N-Term]; 2xPhospho [S1(100); S3(100)]	TGGT1_293000-t26_1-p1 2xPhospho [S269(100); S271(100)]	3	High	1.54003e-08	9.56086e-05	1	1	TGGT1_293000-t26_1-p1	TGGT1_293000-t26_1-p1 [269-294]	1	2862.34	1.165	0.22	1	48.9	42	8.87	10.3	45.9	52.1	NA	NA	45.2	39	NA	NA		High	0.0001044	1.115e-08	7.99
54133	TGGT1_225090	hypothetical protein	transcript=TGGT1_225090-t26_1 | gene=TGGT1_225090 | organism=Toxoplasma_gondii_GT1 | gene_product=hypothetical protein | transcript_product=hypothetical protein | location=TGGT1_chrX:2440173-2449676(-) | protein_length=2472 | sequence_SO=chromosome | SO=protein_coding_gene | is_pseudo=false	[R].LDESLLSDSEEER.[A]	1xTMTpro [N-Term]; 2xPhospho [S7(100); S9(100)]	TGGT1_225090-t26_1-p1 2xPhospho [S1184(100); S1186(100)]	2	High	5.71689e-05	9.56086e-05	1	1	TGGT1_225090-t26_1-p1	TGGT1_225090-t26_1-p1 [1178-1190]	0	1985.83	0.944	-0.08	1	50.5	53.5	10.95	15.79	54.6	46.8	NA	NA	47.8	59.9	NA	NA		High	0.0001044	3.347e-05	4.6
54138	TGGT1_220900	hypothetical protein	transcript=TGGT1_220900-t26_1 | gene=TGGT1_220900 | organism=Toxoplasma_gondii_GT1 | gene_product=hypothetical protein | transcript_product=hypothetical protein | location=TGGT1_chrII:27409-29529(+) | protein_length=706 | sequence_SO=chromosome | SO=protein_coding_gene | is_pseudo=false	[K].IDFASSDEESEREDDCLDK.[N]	1xMethylthio [C16]; 1xTMTpro [K19]; 1xTMTpro [N-Term]; 3xPhospho [S5(100); S6(100); S10(100)]	TGGT1_220900-t26_1-p1 1xMethylthio [C531]; 3xPhospho [S520(100); S521(100); S525(100)]	14	High	8.44517e-05	9.56086e-05	1	1	TGGT1_220900-t26_1-p1	TGGT1_220900-t26_1-p1 [516-534]	1	3097.2	1.103	0.14	1	93	84.3	108.69	109.89	513.2	515.3	16.9	14.2	512.6	434.3	16.4	10.5		High	0.0001044	4.954e-05	3.19
78187	TGGT1_311230	hypothetical protein	transcript=TGGT1_311230-t26_1 | gene=TGGT1_311230 | organism=Toxoplasma_gondii_GT1 | gene_product=hypothetical protein | transcript_product=hypothetical protein | location=TGGT1_chrXI:1844321-1862670(+) | protein_length=4603 | sequence_SO=chromosome | SO=protein_coding_gene | is_pseudo=false	[R].RLSQEELIAGVATPSR.[Q]	1xTMTpro [N-Term]; 1xPhospho [S3(100)]	TGGT1_311230-t26_1-p1 1xPhospho [S3840(100)]	11	High	2.98559e-08	9.56086e-05	1	1	TGGT1_311230-t26_1-p1	TGGT1_311230-t26_1-p1 [3838-3853]	1	2111.12	1.262	0.34	0.901559	558.2	442.1	13.39	9.47	505.9	503.9	615.9	652.8	440.8	369.7	462.1	443.5		High	7.761e-05	8.404e-09	6.61
54157	TGGT1_213392	surface antigen repeat-containing protein	transcript=TGGT1_213392-t26_1 | gene=TGGT1_213392 | organism=Toxoplasma_gondii_GT1 | gene_product=Surface antigen repeat-containing protein [Source:UniProtKB/TrEMBL;Acc:S7UP73] | transcript_product=surface antigen repeat-containing protein | location=TGGT1_chrV:850154-864700(+) | protein_length=2317 | sequence_SO=chromosome | SO=protein_coding_gene | is_pseudo=false	[R].LDGFRDEPSPLGTHR.[T]	1xTMTpro [N-Term]; 1xPhospho [S9(100)]	TGGT1_213392-t26_1-p1 1xPhospho [S780(100)]	6	High	3.85777e-06	9.56086e-05	1	1	TGGT1_213392-t26_1-p1	TGGT1_213392-t26_1-p1 [772-786]	1	2081.01	1.238	0.31	1	232.4	187.7	8.88	10.14	NA	NA	247.5	218.2	NA	NA	201.7	174.7		High	7.761e-05	1.587e-06	4.64
94269	TGGT1_238880	hypothetical protein	transcript=TGGT1_238880-t26_1 | gene=TGGT1_238880 | organism=Toxoplasma_gondii_GT1 | gene_product=hypothetical protein | transcript_product=hypothetical protein | location=TGGT1_chrVI:276222-291010(+) | protein_length=3152 | sequence_SO=chromosome | SO=protein_coding_gene | is_pseudo=false	[R].SRSPDTQLPFAR.[R]	1xTMTpro [N-Term]; 1xPhospho [S3(100)]	TGGT1_238880-t26_1-p1 1xPhospho [S220(100)]	2	High	0.000140804	9.56086e-05	1	1	TGGT1_238880-t26_1-p1	TGGT1_238880-t26_1-p1 [218-229]	1	1758.89	0.72	-0.47	1	13.6	18.9	8.97	4.11	14.5	12.8	NA	NA	19.4	18.4	NA	NA		High	7.761e-05	8.032e-05	3.43
27277	TGGT1_216210	hypothetical protein	transcript=TGGT1_216210-t26_1 | gene=TGGT1_216210 | organism=Toxoplasma_gondii_GT1 | gene_product=DRIM domain-containing protein [Source:UniProtKB/TrEMBL;Acc:S7W0K6] | transcript_product=hypothetical protein | location=TGGT1_chrXI:6240177-6264090(+) | protein_length=5565 | sequence_SO=chromosome | SO=protein_coding_gene | is_pseudo=false	[R].EQDAGDLGSPGPSSAGR.[L]	1xTMTpro [N-Term]; 1xPhospho [S9(100)]	TGGT1_216210-t26_1-p1 1xPhospho [S2405(100)]	1	High	8.99832e-07	9.56086e-05	1	1	TGGT1_216210-t26_1-p1	TGGT1_216210-t26_1-p1 [2397-2413]	0	1984.89	1.01	0.01	1	13.6	13.5	6.37	22.43	NA	NA	13	14.2	NA	NA	11.5	15.8		High	7.761e-05	3.302e-07	5.08
78183	TGGT1_227450	hydrolase, NUDIX family protein	transcript=TGGT1_227450-t26_1 | gene=TGGT1_227450 | organism=Toxoplasma_gondii_GT1 | gene_product=Nudix hydrolase domain-containing protein [Source:UniProtKB/TrEMBL;Acc:S7UXE1] | transcript_product=hydrolase, NUDIX family protein | location=TGGT1_chrX:834070-841020(+) | protein_length=2063 | sequence_SO=chromosome | SO=protein_coding_gene | is_pseudo=false	[R].RLSQDMIPVSPPHTGAGR.[Q]	1xTMTpro [N-Term]; 2xPhospho [S3(100); S10(100)]	TGGT1_227450-t26_1-p1 2xPhospho [S2006(100); S2013(100)]	2	High	8.12596e-06	9.56086e-05	1	1	TGGT1_227450-t26_1-p1	TGGT1_227450-t26_1-p1 [2004-2021]	1	2383.13	1.152	0.2	1	20.3	17.6	12.47	17.13	21.3	24.7	19.4	18.9	18.2	21.7	14.4	17.1		High	7.761e-05	3.546e-06	5.7
94271	TGGT1_234560	hypothetical protein	transcript=TGGT1_234560-t26_1 | gene=TGGT1_234560 | organism=Toxoplasma_gondii_GT1 | gene_product=hypothetical protein | transcript_product=hypothetical protein | location=TGGT1_chrX:4351077-4359828(-) | protein_length=1285 | sequence_SO=chromosome | SO=protein_coding_gene | is_pseudo=false	[R].SRSPEAEAPAR.[L]	1xTMTpro [N-Term]; 1xPhospho [S3(100)]	TGGT1_234560-t26_1-p1 1xPhospho [S927(100)]	25	High	4.26963e-05	9.56086e-05	1	1	TGGT1_234560-t26_1-p1	TGGT1_234560-t26_1-p1 [925-935]	1	1554.76	1.062	0.09	1	546.6	514.8	51.77	50.86	857.3	925.5	333.6	348.5	886.3	779.1	340.2	315.1		High	0.0001044	2.507e-05	3.11
54166	TGGT1_221630	hypothetical protein	transcript=TGGT1_221630-t26_1 | gene=TGGT1_221630 | organism=Toxoplasma_gondii_GT1 | gene_product=hypothetical protein | transcript_product=hypothetical protein | location=TGGT1_chrII:480275-488159(-) | protein_length=1940 | sequence_SO=chromosome | SO=protein_coding_gene | is_pseudo=false	[R].IDGLSDTHEDDSEAR.[F]	1xTMTpro [N-Term]; 1xPhospho [S5(100)]	TGGT1_221630-t26_1-p1 1xPhospho [S1207(100)]	12	High	6.44922e-06	9.56086e-05	1	1	TGGT1_221630-t26_1-p1	TGGT1_221630-t26_1-p1 [1203-1217]	0	2043.88	1.109	0.15	1	65.2	58.8	18.21	11.93	77.9	63.6	49.4	66.9	46.9	61.4	56.7	60.9		High	7.761e-05	2.767e-06	5.15
94277	TGGT1_228120	hypothetical protein	transcript=TGGT1_228120-t26_1 | gene=TGGT1_228120 | organism=Toxoplasma_gondii_GT1 | gene_product=hypothetical protein | transcript_product=hypothetical protein | location=TGGT1_chrX:469350-486422(+) | protein_length=3946 | sequence_SO=chromosome | SO=protein_coding_gene | is_pseudo=false	[R].SRSPFCGPPLLSGSAR.[L]	1xMethylthio [C6]; 1xTMTpro [N-Term]; 1xPhospho [S3(100)]	TGGT1_228120-t26_1-p1 1xMethylthio [C1429]; 1xPhospho [S1426(100)]	2	High	1.10609e-05	9.56086e-05	1	1	TGGT1_228120-t26_1-p1	TGGT1_228120-t26_1-p1 [1424-1439]	1	2061.99	1.125	0.17	1	263.9	234.7	1.4	1.6	NA	NA	266.5	261.3	NA	NA	232	237.3		High	7.761e-05	4.95e-06	5.17
27257	TGGT1_204120	hypothetical protein	transcript=TGGT1_204120-t26_1 | gene=TGGT1_204120 | organism=Toxoplasma_gondii_GT1 | gene_product=hypothetical protein | transcript_product=hypothetical protein | location=TGGT1_chrVIIa:1875680-1880724(-) | protein_length=601 | sequence_SO=chromosome | SO=protein_coding_gene | is_pseudo=false	[R].EQASASPASANEAEK.[A]	1xTMTpro [K15]; 1xTMTpro [N-Term]; 1xPhospho [S6(100)]	TGGT1_204120-t26_1-p1 1xPhospho [S416(100)]	3	High	7.82567e-05	9.56086e-05	1	1	TGGT1_204120-t26_1-p1	TGGT1_204120-t26_1-p1 [411-425]	0	2178.06	1.058	0.08	1	19.4	18.3	18.85	12.95	24.7	17.9	16.2	21	15.2	20.7	17.6	19.1		High	0.0001044	4.586e-05	2.83
54132	TGGT1_263360	WD domain, G-beta repeat-containing protein	transcript=TGGT1_263360-t26_1 | gene=TGGT1_263360 | organism=Toxoplasma_gondii_GT1 | gene_product=WD_REPEATS_REGION domain-containing protein [Source:UniProtKB/TrEMBL;Acc:S7UXP1] | transcript_product=WD domain, G-beta repeat-containing protein | location=TGGT1_chrVIIb:571346-585455(-) | protein_length=1581 | sequence_SO=chromosome | SO=protein_coding_gene | is_pseudo=false	[K].IDESIGSAAEESSR.[V]	1xTMTpro [N-Term]; 1xPhospho [S7(100)]	TGGT1_263360-t26_1-p1 1xPhospho [S439(100)]	5	High	2.22007e-05	9.56086e-05	1	1	TGGT1_263360-t26_1-p1	TGGT1_263360-t26_1-p1 [433-446]	0	1834.84	1.001	0	1	51.2	51.1	11.86	13.24	NA	NA	47	55.6	NA	NA	46.5	56.1		High	7.761e-05	1.052e-05	4.5
94281	TGGT1_319850	splicing factor U2AF family SnRNP auxilary factor large subunit, RRM domain-containing protein	transcript=TGGT1_319850-t26_1 | gene=TGGT1_319850 | organism=Toxoplasma_gondii_GT1 | gene_product=RRM domain-containing protein [Source:UniProtKB/TrEMBL;Acc:S7UK80] | transcript_product=splicing factor U2AF family SnRNP auxilary factor large subunit, RRM domain-containing protein | location=TGGT1_chrIV:689661-691811(+) | protein_length=495 | sequence_SO=chromosome | SO=protein_coding_gene | is_ps…	[R].SRSPGGGGAAGGGK.[G]	1xTMTpro [K14]; 1xTMTpro [N-Term]; 2xPhospho [S1(100); S3(100)]	TGGT1_319850-t26_1-p1 2xPhospho [S165(100); S167(100)]	27	High	9.19619e-06	9.56086e-05	1	1	TGGT1_319850-t26_1-p1	TGGT1_319850-t26_1-p1 [165-178]	1	1883.9	1.088	0.12	1	724.8	666.2	67.03	65.71	1451.4	1388.1	378.4	376.5	1211.4	1321.6	334	366.3		High	0.0001044	5.572e-06	4.26
78182	TGGT1_227450	hydrolase, NUDIX family protein	transcript=TGGT1_227450-t26_1 | gene=TGGT1_227450 | organism=Toxoplasma_gondii_GT1 | gene_product=Nudix hydrolase domain-containing protein [Source:UniProtKB/TrEMBL;Acc:S7UXE1] | transcript_product=hydrolase, NUDIX family protein | location=TGGT1_chrX:834070-841020(+) | protein_length=2063 | sequence_SO=chromosome | SO=protein_coding_gene | is_pseudo=false	[R].RLSQDMIPVSPPHTGAGR.[Q]	1xOxidation [M6]; 1xTMTpro [N-Term]; 1xPhospho [S3(100)]	TGGT1_227450-t26_1-p1 1xPhospho [S2006(100)]	4	High	2.59318e-05	9.56086e-05	1	1	TGGT1_227450-t26_1-p1	TGGT1_227450-t26_1-p1 [2004-2021]	1	2319.16	1.012	0.02	1	64.1	63.3	2.23	7.59	NA	NA	63.1	65.1	NA	NA	60	66.8		High	7.761e-05	1.246e-05	4
27243	TGGT1_268570	zinc finger (CCCH type) motif-containing protein	transcript=TGGT1_268570-t26_1 | gene=TGGT1_268570 | organism=Toxoplasma_gondii_GT1 | gene_product=Zinc finger (CCCH type) motif-containing protein [Source:UniProtKB/TrEMBL;Acc:S7V581] | transcript_product=zinc finger (CCCH type) motif-containing protein | location=TGGT1_chrVIII:6423572-6428080(-) | protein_length=449 | sequence_SO=chromosome | SO=protein_coding_gene | is_pseudo=false	[R].EQAEGPAGGSKSPR.[I]	1xTMTpro [K11]; 1xTMTpro [N-Term]; 1xPhospho [S12(100)]	TGGT1_268570-t26_1-p1 1xPhospho [S416(100)]	7	High	1.58719e-06	9.56086e-05	1	1	TGGT1_268570-t26_1-p1	TGGT1_268570-t26_1-p1 [405-418]	1	2059.05	0.878	-0.19	1	109	124.1	93.03	90.64	46.4	42.5	396	256	37.5	47.9	321.3	369.3		High	7.761e-05	6.095e-07	4.75
27242	TGGT1_268570	zinc finger (CCCH type) motif-containing protein	transcript=TGGT1_268570-t26_1 | gene=TGGT1_268570 | organism=Toxoplasma_gondii_GT1 | gene_product=Zinc finger (CCCH type) motif-containing protein [Source:UniProtKB/TrEMBL;Acc:S7V581] | transcript_product=zinc finger (CCCH type) motif-containing protein | location=TGGT1_chrVIII:6423572-6428080(-) | protein_length=449 | sequence_SO=chromosome | SO=protein_coding_gene | is_pseudo=false	[R].EQAEGPAGGSK.[S]	1xTMTpro [K11]; 1xTMTpro [N-Term]; 1xPhospho [S10(100)]	TGGT1_268570-t26_1-p1 1xPhospho [S414(100)]	2	High	1.69099e-05	9.56086e-05	1	1	TGGT1_268570-t26_1-p1	TGGT1_268570-t26_1-p1 [405-415]	0	1718.86	1.077	0.11	1	58.7	54.5	2.71	5.11	57.6	59.8	NA	NA	52.5	56.5	NA	NA		High	0.0001044	1.011e-05	4.06
94282	TGGT1_209210	hypothetical protein	transcript=TGGT1_209210-t26_1 | gene=TGGT1_209210 | organism=Toxoplasma_gondii_GT1 | gene_product=hypothetical protein | transcript_product=hypothetical protein | location=TGGT1_chrIb:1139917-1148599(+) | protein_length=1492 | sequence_SO=chromosome | SO=protein_coding_gene | is_pseudo=false	[R].SRSPGGGPYFVGYGGYSTR.[T]	1xTMTpro [N-Term]; 2xPhospho [S1(100); S3(100)]	TGGT1_209210-t26_1-p1 2xPhospho [S1376(100); S1378(100)]	3	High	6.47367e-07	9.56086e-05	1	1	TGGT1_209210-t26_1-p1	TGGT1_209210-t26_1-p1 [1376-1394]	1	2429.06	0.966	-0.05	1	206.1	213.3	33.14	27.85	159	145.6	280.7	267.1	138.8	179.4	253.5	255.9		High	7.761e-05	2.317e-07	6.73
94283	TGGT1_270010	hypothetical protein	transcript=TGGT1_270010-t26_1 | gene=TGGT1_270010 | organism=Toxoplasma_gondii_GT1 | gene_product=hypothetical protein | transcript_product=hypothetical protein | location=TGGT1_chrVIII:5449261-5457417(-) | protein_length=556 | sequence_SO=chromosome | SO=protein_coding_gene | is_pseudo=false	[R].SRSPGHPAVVAPNR.[R]	1xTMTpro [N-Term]; 2xPhospho [S1(100); S3(100)]	TGGT1_270010-t26_1-p1 2xPhospho [S520(100); S522(100)]	17	High	4.88758e-05	9.56086e-05	1	1	TGGT1_270010-t26_1-p1	TGGT1_270010-t26_1-p1 [520-533]	1	1908.92	1.002	0	1	162.5	162.1	29.26	31.04	127.4	127.9	206.5	220.6	112.3	132.1	199.1	218.9		High	7.761e-05	2.481e-05	4.21
27239	TGGT1_287480	hypothetical protein	transcript=TGGT1_287480-t26_1 | gene=TGGT1_287480 | organism=Toxoplasma_gondii_GT1 | gene_product=hypothetical protein | transcript_product=hypothetical protein | location=TGGT1_chrV:410863-428566(+) | protein_length=4703 | sequence_SO=chromosome | SO=protein_coding_gene | is_pseudo=false	[R].EQADSPGNQDGKEEENTGASDVVDR.[K]	1xTMTpro [K12]; 1xTMTpro [N-Term]; 1xPhospho [S5(100)]	TGGT1_287480-t26_1-p1 1xPhospho [S1218(100)]	5	High	5.46821e-07	9.56086e-05	1	1	TGGT1_287480-t26_1-p1	TGGT1_287480-t26_1-p1 [1214-1238]	1	3335.52	1.206	0.27	1	29.2	24.2	24.56	10.34	NA	NA	24.5	34.8	NA	NA	26.1	22.5		High	7.761e-05	1.93e-07	5.24
78181	TGGT1_227450	hydrolase, NUDIX family protein	transcript=TGGT1_227450-t26_1 | gene=TGGT1_227450 | organism=Toxoplasma_gondii_GT1 | gene_product=Nudix hydrolase domain-containing protein [Source:UniProtKB/TrEMBL;Acc:S7UXE1] | transcript_product=hydrolase, NUDIX family protein | location=TGGT1_chrX:834070-841020(+) | protein_length=2063 | sequence_SO=chromosome | SO=protein_coding_gene | is_pseudo=false	[R].RLSQDMIPVSPPHTGAGR.[Q]	1xTMTpro [N-Term]; 1xPhospho [S3(100)]	TGGT1_227450-t26_1-p1 1xPhospho [S2006(100)]	3	High	5.63547e-05	9.56086e-05	1	1	TGGT1_227450-t26_1-p1	TGGT1_227450-t26_1-p1 [2004-2021]	1	2303.17	1.205	0.27	1	65.3	54.2	1.44	1.94	NA	NA	64.6	66	NA	NA	53.4	54.9		High	7.761e-05	2.902e-05	3.61
27236	TGGT1_240080	hypothetical protein	transcript=TGGT1_240080-t26_1 | gene=TGGT1_240080 | organism=Toxoplasma_gondii_GT1 | gene_product=hypothetical protein | transcript_product=hypothetical protein | location=TGGT1_chrVI:1039064-1046147(-) | protein_length=1113 | sequence_SO=chromosome | SO=protein_coding_gene | is_pseudo=false	[R].EQADSPAHGGAPLGDSR.[G]	1xTMTpro [N-Term]; 1xPhospho [S5(100)]	TGGT1_240080-t26_1-p1 1xPhospho [S730(100)]	9	High	5.29837e-06	9.56086e-05	1	1	TGGT1_240080-t26_1-p1	TGGT1_240080-t26_1-p1 [726-742]	0	2048.94	1.096	0.13	1	55.3	50.5	6.72	21.37	NA	NA	52.8	58	NA	NA	58.8	43.4		High	7.761e-05	2.235e-06	4.01
54190	TGGT1_281650	hypothetical protein	transcript=TGGT1_281650-t26_1 | gene=TGGT1_281650 | organism=Toxoplasma_gondii_GT1 | gene_product=hypothetical protein | transcript_product=hypothetical protein | location=TGGT1_chrVIIa:4147446-4149734(-) | protein_length=655 | sequence_SO=chromosome | SO=protein_coding_gene | is_pseudo=false	[R].LDHADGDSDEGR.[G]	1xTMTpro [N-Term]; 1xPhospho [S8(100)]	TGGT1_281650-t26_1-p1 1xPhospho [S380(100)]	39	High	1.83565e-05	9.56086e-05	1	1	TGGT1_281650-t26_1-p1	TGGT1_281650-t26_1-p1 [373-384]	0	1670.7	1.101	0.14	1	158.8	144.3	33.23	43.68	218.4	203.8	111.3	123.7	214.4	213.1	97.7	95.1		High	0.0001044	1.095e-05	3.66
27233	TGGT1_257120	sugar transporter ST1	transcript=TGGT1_257120-t26_1 | gene=TGGT1_257120 | organism=Toxoplasma_gondii_GT1 | gene_product=MFS domain-containing protein [Source:UniProtKB/TrEMBL;Acc:A0A125YQ42] | transcript_product=sugar transporter ST1 | location=TGGT1_chrVIIb:4138584-4145407(-) | protein_length=601 | sequence_SO=chromosome | SO=protein_coding_gene | is_pseudo=false	[K].EQAAGSPQSPR.[K]	1xTMTpro [N-Term]; 1xPhospho [S9(100)]	TGGT1_257120-t26_1-p1 1xPhospho [S69(100)]	6	High	9.53595e-06	9.56086e-05	1	1	TGGT1_257120-t26_1-p1	TGGT1_257120-t26_1-p1 [61-71]	0	1511.72	1.132	0.18	1	60.7	53.6	2.72	23.88	NA	NA	59.5	61.8	NA	NA	63.5	45.2		High	7.761e-05	4.216e-06	4.15
54191	TGGT1_281650	hypothetical protein	transcript=TGGT1_281650-t26_1 | gene=TGGT1_281650 | organism=Toxoplasma_gondii_GT1 | gene_product=hypothetical protein | transcript_product=hypothetical protein | location=TGGT1_chrVIIa:4147446-4149734(-) | protein_length=655 | sequence_SO=chromosome | SO=protein_coding_gene | is_pseudo=false	[R].LDHADGDSDEGRGR.[R]	1xTMTpro [N-Term]; 1xPhospho [S8(100)]	TGGT1_281650-t26_1-p1 1xPhospho [S380(100)]	5	High	5.98688e-05	9.56086e-05	1	1	TGGT1_281650-t26_1-p1	TGGT1_281650-t26_1-p1 [373-386]	1	1883.82	0.735	-0.44	1	7.7	10.4	9.11	18.15	NA	NA	8.2	7.2	NA	NA	11.9	9.2		High	7.761e-05	3.1e-05	3.24
78174	TGGT1_281980	phosphatidate cytidylyltransferase	transcript=TGGT1_281980-t26_1 | gene=TGGT1_281980 | organism=Toxoplasma_gondii_GT1 | gene_product=Phosphatidate cytidylyltransferase [Source:UniProtKB/TrEMBL;Acc:S7WBC8] | transcript_product=phosphatidate cytidylyltransferase | location=TGGT1_chrVIIa:4205847-4209053(-) | protein_length=1068 | sequence_SO=chromosome | SO=protein_coding_gene | is_pseudo=false	[R].RISPTDHQVASVR.[D]	1xTMTpro [N-Term]; 1xPhospho [S3(100)]	TGGT1_281980-t26_1-p1 1xPhospho [S276(100)]	4	High	3.77607e-05	9.56086e-05	1	1	TGGT1_281980-t26_1-p1	TGGT1_281980-t26_1-p1 [274-286]	1	1849.96	1.228	0.3	1	96.9	78.9	19.81	1.68	NA	NA	111.6	84.2	NA	NA	78	79.9		High	7.761e-05	1.872e-05	4.04
27245	TGGT1_309780	hypothetical protein	transcript=TGGT1_309780-t26_1 | gene=TGGT1_309780 | organism=Toxoplasma_gondii_GT1 | gene_product=hypothetical protein | transcript_product=hypothetical protein | location=TGGT1_chrXI:768347-771655(+) | protein_length=270 | sequence_SO=chromosome | SO=protein_coding_gene | is_pseudo=false	[R].EQAERESDEAQLK.[R]	1xTMTpro [K13]; 1xTMTpro [N-Term]; 1xPhospho [S7(100)]	TGGT1_309780-t26_1-p1 1xPhospho [S228(100)]	12	High	2.03213e-05	9.56086e-05	1	1	TGGT1_309780-t26_1-p1	TGGT1_309780-t26_1-p1 [222-234]	1	2221.1	1.063	0.09	1	446.3	420	51.22	40.28	696.6	753.3	275.5	285.9	589.1	580.3	262.7	304		High	7.761e-05	9.564e-06	3.47
94262	TGGT1_293000	3'5'-cyclic nucleotide phosphodiesterase domain-containing protein	transcript=TGGT1_293000-t26_1 | gene=TGGT1_293000 | organism=Toxoplasma_gondii_GT1 | gene_product=Phosphodiesterase [Source:UniProtKB/TrEMBL;Acc:S7UHU3] | transcript_product=3'5'-cyclic nucleotide phosphodiesterase domain-containing protein | location=TGGT1_chrIa:58977-74026(+) | protein_length=2238 | sequence_SO=chromosome | SO=protein_coding_gene | is_pseudo=false	[R].SRSPASGGALALGVDSEETAPAGAAR.[R]	1xTMTpro [N-Term]; 1xPhospho [S/T]		6	High	6.72102e-09	9.56086e-05	1	1	TGGT1_293000-t26_1-p1	TGGT1_293000-t26_1-p1 [269-294]	1	2782.37	0.986	-0.02	1	13	13.2	1.93	14.77	NA	NA	12.9	13.2	NA	NA	11.9	14.7		High	7.761e-05	1.683e-09	6.15
94176	TGGT1_289880	hypothetical protein	transcript=TGGT1_289880-t26_1 | gene=TGGT1_289880 | organism=Toxoplasma_gondii_GT1 | gene_product=hypothetical protein | transcript_product=hypothetical protein | location=TGGT1_chrIX:3301494-3313288(-) | protein_length=1326 | sequence_SO=chromosome | SO=protein_coding_gene | is_pseudo=false	[R].SRSFEELSPSELVAPSR.[V]	1xTMTpro [N-Term]; 3xPhospho [S1(100); S3(100); S8(100)]	TGGT1_289880-t26_1-p1 3xPhospho [S172(100); S174(100); S179(100)]	5	High	2.27526e-05	9.56086e-05	1	1	TGGT1_289880-t26_1-p1	TGGT1_289880-t26_1-p1 [172-188]	1	2435.06	0.385	-1.38	1	29.2	76	51.17	53.04	41	57.3	20.9	20.2	136.3	114.8	44.9	50.2		High	0.0001044	1.351e-05	5.22
54094	TGGT1_233000	KOW motif domain-containing protein	transcript=TGGT1_233000-t26_1 | gene=TGGT1_233000 | organism=Toxoplasma_gondii_GT1 | gene_product=KOW motif domain-containing protein [Source:UniProtKB/TrEMBL;Acc:S7V342] | transcript_product=KOW motif domain-containing protein | location=TGGT1_chrVIII:2313902-2327775(-) | protein_length=1179 | sequence_SO=chromosome | SO=protein_coding_gene | is_pseudo=false	[K].IDDLDFDGHLLTPR.[E]	1xTMTpro [N-Term]; 1xPhospho [T12(100)]	TGGT1_233000-t26_1-p1 1xPhospho [T1029(100)]	1	High	6.30451e-07	9.56086e-05	1	1	TGGT1_233000-t26_1-p1	TGGT1_233000-t26_1-p1 [1018-1031]	0	2010.99	1.008	0.01	1	96.8	96	12.7	7.64	NA	NA	88.5	106	NA	NA	101.4	91		High	7.761e-05	2.252e-07	6.55
78204	TGGT1_305540	hypothetical protein	transcript=TGGT1_305540-t26_1 | gene=TGGT1_305540 | organism=Toxoplasma_gondii_GT1 | gene_product=hypothetical protein | transcript_product=hypothetical protein | location=TGGT1_chrIX:5235605-5242113(-) | protein_length=824 | sequence_SO=chromosome | SO=protein_coding_gene | is_pseudo=false	[R].RLSSAVAEDQNGMEER.[R]	1xTMTpro [N-Term]; 1xPhospho [S3(100)]	TGGT1_305540-t26_1-p1 1xPhospho [S620(100)]	5	High	1.73316e-05	9.56086e-05	1	1	TGGT1_305540-t26_1-p1	TGGT1_305540-t26_1-p1 [618-633]	1	2176	1.103	0.14	1	46.2	41.9	29.94	35.62	50.3	75.2	42.5	41.6	57.4	51.6	34.1	25.2		High	7.761e-05	8.053e-06	4.03
54103	TGGT1_222350	hypothetical protein	transcript=TGGT1_222350-t26_1 | gene=TGGT1_222350 | organism=Toxoplasma_gondii_GT1 | gene_product=hypothetical protein | transcript_product=hypothetical protein | location=TGGT1_chrII:1038452-1045656(-) | protein_length=410 | sequence_SO=chromosome | SO=protein_coding_gene | is_pseudo=false	[K].IDDSTDSSGSHDGPR.[N]	1xTMTpro [N-Term]; 1xPhospho [S10(100)]	TGGT1_222350-t26_1-p1 1xPhospho [S60(100)]	2	High	4.01551e-05	9.56086e-05	1	1	TGGT1_222350-t26_1-p1	TGGT1_222350-t26_1-p1 [51-65]	0	1929.81	1.724	0.79	NA	12	6.9	NA	27.22	NA	NA	NA	12	NA	NA	5.7	8.4		High	7.761e-05	2.003e-05	4
27421	TGGT1_291980	HECT-domain (ubiquitin-transferase) domain-containing protein	transcript=TGGT1_291980-t26_1 | gene=TGGT1_291980 | organism=Toxoplasma_gondii_GT1 | gene_product=HECT domain-containing protein [Source:UniProtKB/TrEMBL;Acc:S7W439] | transcript_product=HECT-domain (ubiquitin-transferase) domain-containing protein | location=TGGT1_chrIX:4247476-4268188(-) | protein_length=4151 | sequence_SO=chromosome | SO=protein_coding_gene | is_pseudo=false	[R].EQGVEVEPGHSGEK.[R]	1xTMTpro [K14]; 1xTMTpro [N-Term]; 1xPhospho [S11(100)]	TGGT1_291980-t26_1-p1 1xPhospho [S1811(100)]	3	High	1.40897e-05	9.56086e-05	1	1	TGGT1_291980-t26_1-p1	TGGT1_291980-t26_1-p1 [1801-1814]	0	2170.07	0.958	-0.06	1	39.9	41.7	29.2	11.1	25.7	34.2	50.7	46.6	35.8	39.3	45.8	44.2		High	7.761e-05	6.436e-06	4.07
94195	TGGT1_224870	hypothetical protein	transcript=TGGT1_224870-t26_1 | gene=TGGT1_224870 | organism=Toxoplasma_gondii_GT1 | gene_product=Spatacsin_C domain-containing protein [Source:UniProtKB/TrEMBL;Acc:S7WCA2] | transcript_product=hypothetical protein | location=TGGT1_chrX:2638976-2675045(+) | protein_length=8635 | sequence_SO=chromosome | SO=protein_coding_gene | is_pseudo=false	[R].SRSGALTPLAPSAASGLSPGDAEAEQR.[S]	1xTMTpro [N-Term]; 1xPhospho [S/T]		2	High	2.3525e-08	9.56086e-05	1	1	TGGT1_224870-t26_1-p1	TGGT1_224870-t26_1-p1 [3256-3282]	1	2980.47	0.85	-0.23	1	15	17.7	11.36	13.13	NA	NA	16.3	13.9	NA	NA	16.1	19.4		High	0.0001044	1.682e-08	4.45
94198	TGGT1_210980	putative alternative splicing type 3 and	transcript=TGGT1_210980-t26_1 | gene=TGGT1_210980 | organism=Toxoplasma_gondii_GT1 | gene_product=Putative alternative splicing type 3 and [Source:UniProtKB/TrEMBL;Acc:S7UKQ1] | transcript_product=putative alternative splicing type 3 and | location=TGGT1_chrIV:1920085-1926796(-) | protein_length=554 | sequence_SO=chromosome | SO=protein_coding_gene | is_pseudo=false	[R].SRSGDRAEEEGEAK.[G]	1xTMTpro [K14]; 1xTMTpro [N-Term]; 2xPhospho [S1(100); S3(100)]	TGGT1_210980-t26_1-p1 2xPhospho [S458(100); S460(100)]	81	High	2.98564e-06	9.56086e-05	1	1	TGGT1_210980-t26_1-p1	TGGT1_210980-t26_1-p1 [458-471]	2	2289.04	1.024	0.03	1	2092.1	2042.7	30.05	31.91	2764.9	2682.9	1569.9	1631.4	2700.4	2703.5	1545.2	1518.7		High	7.761e-05	1.406e-06	7.09
94202	TGGT1_269390	CRAL/TRIO domain-containing protein	transcript=TGGT1_269390-t26_1 | gene=TGGT1_269390 | organism=Toxoplasma_gondii_GT1 | gene_product=CRAL/TRIO domain-containing protein [Source:UniProtKB/TrEMBL;Acc:S7V5J7] | transcript_product=CRAL/TRIO domain-containing protein | location=TGGT1_chrVIII:5840638-5846891(-) | protein_length=994 | sequence_SO=chromosome | SO=protein_coding_gene | is_pseudo=false	[R].SRSGGDSTTIAEDVSAAEAAHVLK.[E]	1xTMTpro [K24]; 1xTMTpro [N-Term]; 1xPhospho [S/T]		1	High	9.45765e-06	9.56086e-05	1	1	TGGT1_269390-t26_1-p1	TGGT1_269390-t26_1-p1 [475-498]	1	3060.55	1.653	0.72	1	29	17.5	10.62	29.2	NA	NA	26.9	31.3	NA	NA	21.6	14.2		High	7.761e-05	4.182e-06	3.88
94203	TGGT1_222230	hypothetical protein	transcript=TGGT1_222230-t26_1 | gene=TGGT1_222230 | organism=Toxoplasma_gondii_GT1 | gene_product=MMS19_N domain-containing protein [Source:UniProtKB/TrEMBL;Acc:S7UK88] | transcript_product=hypothetical protein | location=TGGT1_chrII:956224-964969(-) | protein_length=2494 | sequence_SO=chromosome | SO=protein_coding_gene | is_pseudo=false	[R].SRSGGEEDESGR.[V]	1xTMTpro [N-Term]; 1xPhospho [S3(100)]	TGGT1_222230-t26_1-p1 1xPhospho [S834(100)]	12	High	9.90862e-05	9.56086e-05	1	1	TGGT1_222230-t26_1-p1	TGGT1_222230-t26_1-p1 [832-843]	1	1649.71	1.167	0.22	1	80.6	69.1	91.54	89.23	227.3	248.5	27	28.6	189	195.9	25.2	24.2		High	0.0001044	5.831e-05	2.88
78195	TGGT1_214210	rRNA pseudouridine synthase	transcript=TGGT1_214210-t26_1 | gene=TGGT1_214210 | organism=Toxoplasma_gondii_GT1 | gene_product=PUA domain-containing protein [Source:UniProtKB/TrEMBL;Acc:A0A125YRK0] | transcript_product=rRNA pseudouridine synthase | location=TGGT1_chrX:6002905-6008379(-) | protein_length=505 | sequence_SO=chromosome | SO=protein_coding_gene | is_pseudo=false	[R].RLSQGSENGDAEEEVREK.[K]	1xTMTpro [K18]; 1xTMTpro [N-Term]; 2xPhospho [S3(100); S6(100)]	TGGT1_214210-t26_1-p1 2xPhospho [S478(100); S481(100)]	12	High	7.88693e-05	9.56086e-05	1	1	TGGT1_214210-t26_1-p1	TGGT1_214210-t26_1-p1 [476-493]	2	2801.3	0.913	-0.13	1	237.1	259.7	8	17.01	263.2	242.9	231.4	218.1	280	289.1	195.5	240.8		High	7.761e-05	4.198e-05	3.79
78188	TGGT1_311230	hypothetical protein	transcript=TGGT1_311230-t26_1 | gene=TGGT1_311230 | organism=Toxoplasma_gondii_GT1 | gene_product=hypothetical protein | transcript_product=hypothetical protein | location=TGGT1_chrXI:1844321-1862670(+) | protein_length=4603 | sequence_SO=chromosome | SO=protein_coding_gene | is_pseudo=false	[R].RLSQEELIAGVATPSR.[Q]	1xTMTpro [N-Term]; 2xPhospho [S3(100); T13(99.6)]	TGGT1_311230-t26_1-p1 2xPhospho [S3840(100); T3850(99.6)]	4	High	2.21326e-06	9.56086e-05	1	1	TGGT1_311230-t26_1-p1	TGGT1_311230-t26_1-p1 [3838-3853]	1	2191.08	1.823	0.87	1	97.5	53.5	36.59	33.22	110.2	157.7	68.5	86.4	60.4	87.2	43.4	47.4		High	7.761e-05	8.723e-07	5.56
54109	TGGT1_237280	TLD protein	transcript=TGGT1_237280-t26_1 | gene=TGGT1_237280 | organism=Toxoplasma_gondii_GT1 | gene_product=Rab-GAP TBC domain-containing protein [Source:UniProtKB/TrEMBL;Acc:S7UQ40] | transcript_product=TLD protein | location=TGGT1_chrX:5711509-5719913(+) | protein_length=2190 | sequence_SO=chromosome | SO=protein_coding_gene | is_pseudo=false	[K].IDEDRDSVPGSTSAR.[G]	1xTMTpro [N-Term]; 1xPhospho [S7(100)]	TGGT1_237280-t26_1-p1 1xPhospho [S858(100)]	13	High	1.68545e-05	9.56086e-05	1	1	TGGT1_237280-t26_1-p1	TGGT1_237280-t26_1-p1 [852-866]	1	1988.92	1.004	0.01	1	161.2	160.5	12.82	14.62	142.5	151.4	189.4	171.5	144.3	144.5	178.3	191.7		High	7.761e-05	9.323e-06	4.25
27372	TGGT1_205220	putative U5 snRNP-associated subunit	transcript=TGGT1_205220-t26_1 | gene=TGGT1_205220 | organism=Toxoplasma_gondii_GT1 | gene_product=PRP1_N domain-containing protein [Source:UniProtKB/TrEMBL;Acc:S7UTZ4] | transcript_product=putative U5 snRNP-associated subunit | location=TGGT1_chrVIIa:1443394-1451209(+) | protein_length=1113 | sequence_SO=chromosome | SO=protein_coding_gene | is_pseudo=false	[R].EQGDSSPTQQGASDAK.[A]	1xTMTpro [K16]; 1xTMTpro [N-Term]; 1xPhospho [S6(99.3)]	TGGT1_205220-t26_1-p1 1xPhospho [S1068(99.3)]	13	High	1.27792e-06	9.56086e-05	1	1	TGGT1_205220-t26_1-p1	TGGT1_205220-t26_1-p1 [1063-1078]	0	2294.08	1.104	0.14	1	188.6	170.8	66.07	65.14	356.2	375.3	99.9	99.6	333	307.4	84.6	94.9		High	0.0001044	8.178e-07	4.57
78194	TGGT1_214210	rRNA pseudouridine synthase	transcript=TGGT1_214210-t26_1 | gene=TGGT1_214210 | organism=Toxoplasma_gondii_GT1 | gene_product=PUA domain-containing protein [Source:UniProtKB/TrEMBL;Acc:A0A125YRK0] | transcript_product=rRNA pseudouridine synthase | location=TGGT1_chrX:6002905-6008379(-) | protein_length=505 | sequence_SO=chromosome | SO=protein_coding_gene | is_pseudo=false	[R].RLSQGSENGDAEEEVR.[E]	1xTMTpro [N-Term]; 2xPhospho [S3(100); S6(100)]	TGGT1_214210-t26_1-p1 2xPhospho [S478(100); S481(100)]	71	High	1.26111e-06	9.56086e-05	1	1	TGGT1_214210-t26_1-p1	TGGT1_214210-t26_1-p1 [476-491]	1	2239.96	1.098	0.13	1	1387	1263.7	17.61	15.69	1575.3	1650.8	1160.6	1221.2	1425	1456.8	1120.6	1075.8		High	7.761e-05	4.754e-07	6
94213	TGGT1_218300	zinc finger (CCCH type) motif-containing protein	transcript=TGGT1_218300-t26_1 | gene=TGGT1_218300 | organism=Toxoplasma_gondii_GT1 | gene_product=Zinc finger (CCCH type) motif-containing protein [Source:UniProtKB/TrEMBL;Acc:S7WHJ3] | transcript_product=zinc finger (CCCH type) motif-containing protein | location=TGGT1_chrXII:1547799-1552883(-) | protein_length=1199 | sequence_SO=chromosome | SO=protein_coding_gene | is_pseudo=false	[K].SRSGSAGDAELQEYVSVK.[K]	1xTMTpro [K18]; 1xTMTpro [N-Term]; 2xPhospho [S1(99.8); S/Y]	TGGT1_218300-t26_1-p1 2xPhospho [S315(99.8); S/Y]	2	High	8.69465e-06	9.56086e-05	1	1	TGGT1_218300-t26_1-p1	TGGT1_218300-t26_1-p1 [315-332]	1	2651.26	0.865	-0.21	1	68.8	79.6	46.37	38	116.1	93.9	50.5	42.5	95.9	127.6	54.7	66		High	0.0001044	5.276e-06	5.3
94220	TGGT1_261260A	histone lysine demethylase JMJD6a	transcript=TGGT1_261260A-t26_1 | gene=TGGT1_261260A | organism=Toxoplasma_gondii_GT1 | gene_product=JmjC domain-containing protein [Source:UniProtKB/TrEMBL;Acc:S7WEE9] | transcript_product=histone lysine demethylase JMJD6a | location=TGGT1_chrVIIb:1769864-1774963(-) | protein_length=395 | sequence_SO=chromosome | SO=protein_coding_gene | is_pseudo=false	[R].SRSGYTYYGPSGEFFR.[H]	1xTMTpro [N-Term]; 1xPhospho [S3(100)]	TGGT1_261260A-t26_1-p1 1xPhospho [S51(100)]	1	High	9.12066e-06	9.56086e-05	1	1	TGGT1_261260A-t26_1-p1	TGGT1_261260A-t26_1-p1 [49-64]	1	2258.02	0.807	-0.31	1	47.9	59.3	3.11	7.38	NA	NA	46.9	49	NA	NA	56.3	62.5		High	7.761e-05	4.017e-06	4.62
94224	TGGT1_221500	dual specificity phosphatase, catalytic domain-containing protein	transcript=TGGT1_221500-t26_1 | gene=TGGT1_221500 | organism=Toxoplasma_gondii_GT1 | gene_product=Dual specificity phosphatase, catalytic domain-containing protein [Source:UniProtKB/TrEMBL;Acc:S7VU70] | transcript_product=dual specificity phosphatase, catalytic domain-containing protein | location=TGGT1_chrII:384010-387824(-) | protein_length=982 | sequence_SO=chromosome | SO=protein_coding_gene …	[R].SRSLDLASAALASTDGTR.[R]	1xTMTpro [N-Term]; 1xPhospho [S3(100)]	TGGT1_221500-t26_1-p1 1xPhospho [S622(100)]	4	High	1.87526e-08	9.56086e-05	1	1	TGGT1_221500-t26_1-p1	TGGT1_221500-t26_1-p1 [620-637]	1	2176.09	0.958	-0.06	1	97.5	101.8	29.75	31.41	75	77.5	134	122.7	69	80.3	130.3	129		High	0.0001044	1.35e-08	6.46
27339	TGGT1_299050	ribosomal protein RPL17	transcript=TGGT1_299050-t26_1 | gene=TGGT1_299050 | organism=Toxoplasma_gondii_GT1 | gene_product=Ribosomal protein RPL17 [Source:UniProtKB/TrEMBL;Acc:A0A125YQZ7] | transcript_product=ribosomal protein RPL17 | location=TGGT1_chrIII:2205438-2207707(-) | protein_length=195 | sequence_SO=chromosome | SO=protein_coding_gene | is_pseudo=false	[R].EQEQAVEKPSVEGVK.[A]	2xTMTpro [K8; K15]; 1xTMTpro [N-Term]; 1xPhospho [S10(100)]	TGGT1_299050-t26_1-p1 1xPhospho [S167(100)]	8	High	2.50971e-06	9.56086e-05	1	1	TGGT1_299050-t26_1-p1	TGGT1_299050-t26_1-p1 [158-172]	0	2649.43	0.505	-0.98	0.000425391	93	184	4.73	5.31	86.6	93.6	97.1	92.5	166.6	187.2	186.6	181.5		High	7.761e-05	9.985e-07	5.22
27321	TGGT1_234280	AMP deaminase	transcript=TGGT1_234280-t26_1 | gene=TGGT1_234280 | organism=Toxoplasma_gondii_GT1 | gene_product=A_deaminase domain-containing protein [Source:UniProtKB/TrEMBL;Acc:S7UWB4] | transcript_product=AMP deaminase | location=TGGT1_chrX:4167559-4179258(-) | protein_length=1159 | sequence_SO=chromosome | SO=protein_coding_gene | is_pseudo=false	[R].EQEELHASHSITVSPPDSAEGTEK.[D]	1xTMTpro [K24]; 1xTMTpro [N-Term]; 1xPhospho [S10(100)]	TGGT1_234280-t26_1-p1 1xPhospho [S942(100)]	3	High	2.4894e-05	9.56086e-05	1	1	TGGT1_234280-t26_1-p1	TGGT1_234280-t26_1-p1 [933-956]	0	3266.57	0.88	-0.18	1	33.2	37.7	6.73	8.47	NA	NA	34.8	31.7	NA	NA	40.1	35.5		High	7.761e-05	1.191e-05	3.74
78193	TGGT1_214210	rRNA pseudouridine synthase	transcript=TGGT1_214210-t26_1 | gene=TGGT1_214210 | organism=Toxoplasma_gondii_GT1 | gene_product=PUA domain-containing protein [Source:UniProtKB/TrEMBL;Acc:A0A125YRK0] | transcript_product=rRNA pseudouridine synthase | location=TGGT1_chrX:6002905-6008379(-) | protein_length=505 | sequence_SO=chromosome | SO=protein_coding_gene | is_pseudo=false	[R].RLSQGSENGDAEEEVR.[E]	1xTMTpro [N-Term]; 1xPhospho [S3(100)]	TGGT1_214210-t26_1-p1 1xPhospho [S478(100)]	10	High	1.053e-06	9.56086e-05	1	1	TGGT1_214210-t26_1-p1	TGGT1_214210-t26_1-p1 [476-491]	1	2159.99	1.253	0.32	1	76.2	60.9	12.65	0.33	NA	NA	83.4	69.7	NA	NA	60.7	61		High	7.761e-05	3.914e-07	4.81
54123	TGGT1_232760	protein phosphatase inhibitor IPP2	transcript=TGGT1_232760-t26_1 | gene=TGGT1_232760 | organism=Toxoplasma_gondii_GT1 | gene_product=Protein phosphatase inhibitor IPP2 [Source:UniProtKB/TrEMBL;Acc:A0A125YXL4] | transcript_product=protein phosphatase inhibitor IPP2 | location=TGGT1_chrVIII:2246948-2248139(+) | protein_length=145 | sequence_SO=chromosome | SO=protein_coding_gene | is_pseudo=false	[K].IDEPPTPYHR.[R]	1xTMTpro [N-Term]; 1xPhospho [T6(100)]	TGGT1_232760-t26_1-p1 1xPhospho [T60(100)]	11	High	0.000111148	9.56086e-05	1	1	TGGT1_232760-t26_1-p1	TGGT1_232760-t26_1-p1 [55-64]	0	1608.77	0.893	-0.16	1	79.3	88.8	3.7	56.92	76	82.6	77.9	80.7	205.9	74.8	105.3	65.6		High	0.0001044	6.564e-05	3.76
54402	TGGT1_234270	hypothetical protein	transcript=TGGT1_234270-t26_1 | gene=TGGT1_234270 | organism=Toxoplasma_gondii_GT1 | gene_product=hypothetical protein | transcript_product=hypothetical protein | location=TGGT1_chrX:4150640-4163518(+) | protein_length=2027 | sequence_SO=chromosome | SO=protein_coding_gene | is_pseudo=false	[R].LDTRDADELEFAEAANR.[A]	1xTMTpro [N-Term]; 1xPhospho [T3(100)]	TGGT1_234270-t26_1-p1 1xPhospho [T248(100)]	7	High	1.69577e-06	9.56086e-05	1	1	TGGT1_234270-t26_1-p1	TGGT1_234270-t26_1-p1 [246-262]	1	2320.08	0.786	-0.35	1	56.3	71.7	18.25	11.21	61.2	41.3	62.8	51.8	72.2	67.2	86.2	71.1		High	7.761e-05	6.542e-07	5.47
94341	TGGT1_236240	Tyrosine kinase-like (TKL) protein	transcript=TGGT1_236240-t26_1 | gene=TGGT1_236240 | organism=Toxoplasma_gondii_GT1 | gene_product=Protein kinase domain-containing protein [Source:UniProtKB/TrEMBL;Acc:S7URI6] | transcript_product=Tyrosine kinase-like (TKL) protein | location=TGGT1_chrX:5234649-5239604(+) | protein_length=783 | sequence_SO=chromosome | SO=protein_coding_gene | is_pseudo=false	[R].SRSQLLSSPTAGYNTR.[R]	1xTMTpro [N-Term]; 1xPhospho [S3(99.5)]	TGGT1_236240-t26_1-p1 1xPhospho [S684(99.5)]	1	High	4.91117e-05	9.56086e-05	1	1	TGGT1_236240-t26_1-p1	TGGT1_236240-t26_1-p1 [682-697]	1	2122.06	0.949	-0.07	1	30	31.6	13.97	6.43	NA	NA	33.1	27.2	NA	NA	30.2	33.1		High	7.761e-05	2.496e-05	3.36
54343	TGGT1_306020	hypothetical protein	transcript=TGGT1_306020-t26_1 | gene=TGGT1_306020 | organism=Toxoplasma_gondii_GT1 | gene_product=hypothetical protein | transcript_product=hypothetical protein | location=TGGT1_chrIX:5506123-5536326(+) | protein_length=8858 | sequence_SO=chromosome | SO=protein_coding_gene | is_pseudo=false	[R].LDSQGTGNSYNVVR.[L]	1xTMTpro [N-Term]; 1xPhospho [S3(100)]	TGGT1_306020-t26_1-p1 1xPhospho [S8519(100)]	1	High	0.000123341	9.56086e-05	1	1	TGGT1_306020-t26_1-p1	TGGT1_306020-t26_1-p1 [8517-8530]	0	1893.9	1.066	0.09	1	30.8	28.9	2.52	5.96	NA	NA	31.4	30.3	NA	NA	27.7	30.2		High	7.761e-05	6.912e-05	3.48
78123	TGGT1_289350	ATP-binding cassette G family transporter ABCG84	transcript=TGGT1_289350-t26_1 | gene=TGGT1_289350 | organism=Toxoplasma_gondii_GT1 | gene_product=ABC transporter domain-containing protein [Source:UniProtKB/TrEMBL;Acc:S7VYI6] | transcript_product=ATP-binding cassette G family transporter ABCG84 | location=TGGT1_chrIX:3026173-3037688(+) | protein_length=766 | sequence_SO=chromosome | SO=protein_coding_gene | is_pseudo=false	[R].RLSLDGATAEPSSGGALRPQSDADMLER.[G]	1xTMTpro [N-Term]; 1xPhospho [S3(100)]	TGGT1_289350-t26_1-p1 1xPhospho [S47(100)]	3	High	8.46918e-08	9.56086e-05	1	1	TGGT1_289350-t26_1-p1	TGGT1_289350-t26_1-p1 [45-72]	1	3284.59	1.636	0.71	1	125.5	76.7	88.04	92.75	49.6	37.2	317.1	325.6	25.9	25.3	227.1	239.8		High	7.761e-05	2.584e-08	6.35
26936	TGGT1_254580	UDP-galactose transporter family protein	transcript=TGGT1_254580-t26_1 | gene=TGGT1_254580 | organism=Toxoplasma_gondii_GT1 | gene_product=UDP-galactose transporter family protein [Source:UniProtKB/TrEMBL;Acc:S7UMX4] | transcript_product=UDP-galactose transporter family protein | location=TGGT1_chrIII:1827569-1829516(-) | protein_length=413 | sequence_SO=chromosome | SO=protein_coding_gene | is_pseudo=false	[K].EPASPTAHGGENALK.[K]	1xTMTpro [K15]; 1xTMTpro [N-Term]; 1xPhospho [S4(100)]	TGGT1_254580-t26_1-p1 1xPhospho [S399(100)]	11	High	7.42676e-07	9.56086e-05	1	1	TGGT1_254580-t26_1-p1	TGGT1_254580-t26_1-p1 [396-410]	0	2167.1	1.014	0.02	1	560.1	552.2	41.2	43.67	380.5	387.7	809.3	811.1	377.3	355.4	808.1	815		High	7.761e-05	2.687e-07	5.64
78120	TGGT1_257300	hypothetical protein	transcript=TGGT1_257300-t26_1 | gene=TGGT1_257300 | organism=Toxoplasma_gondii_GT1 | gene_product=hypothetical protein | transcript_product=hypothetical protein | location=TGGT1_chrVIIb:4070107-4078962(+) | protein_length=1152 | sequence_SO=chromosome | SO=protein_coding_gene | is_pseudo=false	[R].RLSGVSPPSALK.[R]	1xTMTpro [K12]; 1xTMTpro [N-Term]; 1xPhospho [S3(100)]	TGGT1_257300-t26_1-p1 1xPhospho [S93(100)]	2	High	1.28493e-05	9.56086e-05	1	1	TGGT1_257300-t26_1-p1	TGGT1_257300-t26_1-p1 [91-102]	1	1900.09	1.239	0.31	1	157.7	127.3	47.95	54.11	254.1	237.8	104.6	99.3	196.4	226.1	82.5	72.8		High	7.761e-05	5.823e-06	4.51
94609	TGGT1_231640	alveolin domain containing intermediate filament IMC1	transcript=TGGT1_231640-t26_1 | gene=TGGT1_231640 | organism=Toxoplasma_gondii_GT1 | gene_product=Alveolin domain containing intermediate filament IMC1 [Source:UniProtKB/TrEMBL;Acc:A0A125YFV6] | transcript_product=alveolin domain containing intermediate filament IMC1 | location=TGGT1_chrVIII:1511977-1514752(+) | protein_length=609 | sequence_SO=chromosome | SO=protein_coding_gene | is_pseudo=false	[R].SRTVPIGEETER.[Q]	1xTMTpro [N-Term]; 1xPhospho [T3(100)]	TGGT1_231640-t26_1-p1 1xPhospho [T80(100)]	38	High	4.20129e-05	9.56086e-05	1	1	TGGT1_231640-t26_1-p1	TGGT1_231640-t26_1-p1 [78-89]	1	1757.88	0.952	-0.07	1	402.2	422.3	32.87	30.5	516.1	563.6	313.4	292.2	548.1	560.6	320.3	325.4		High	0.0001044	2.466e-05	3.25
26881	TGGT1_238410	hypothetical protein	transcript=TGGT1_238410-t26_1 | gene=TGGT1_238410 | organism=Toxoplasma_gondii_GT1 | gene_product=hypothetical protein | transcript_product=hypothetical protein | location=TGGT1_chrVI:210000-214878(+) | protein_length=1535 | sequence_SO=chromosome | SO=protein_coding_gene | is_pseudo=false	[R].ENTGNHQAGTTEEK.[R]	1xTMTpro [K14]; 1xTMTpro [N-Term]; 1xPhospho [T3(100)]	TGGT1_238410-t26_1-p1 1xPhospho [T341(100)]	5	High	1.52219e-05	9.56086e-05	1	1	TGGT1_238410-t26_1-p1	TGGT1_238410-t26_1-p1 [339-352]	0	2204.05	0.408	-1.29	0.888571	24.7	60.6	35.75	28.92	30.3	38.5	20.1	17.8	76.1	74.9	49	42.2		High	0.0001044	9.109e-06	4.31
94635	TGGT1_219700	putative DNA replication licensing factor MCM4	transcript=TGGT1_219700-t26_1 | gene=TGGT1_219700 | organism=Toxoplasma_gondii_GT1 | gene_product=MCM domain-containing protein [Source:UniProtKB/TrEMBL;Acc:S7V296] | transcript_product=putative DNA replication licensing factor MCM4 | location=TGGT1_chrXII:651605-660187(+) | protein_length=1014 | sequence_SO=chromosome | SO=protein_coding_gene | is_pseudo=false	[R].SRVSGPPDEHEVNAEDMEMQDEVTPLR.[G]	1xTMTpro [N-Term]; 1xPhospho [S4(99.4)]	TGGT1_219700-t26_1-p1 1xPhospho [S10(99.4)]	2	High	3.83954e-08	9.56086e-05	1	1	TGGT1_219700-t26_1-p1	TGGT1_219700-t26_1-p1 [7-33]	1	3451.55	0.775	-0.37	1	14.6	18.9	15.99	18.41	NA	NA	13.1	16.4	NA	NA	21.5	16.6		High	7.761e-05	1.102e-08	7.69
94636	TGGT1_219700	putative DNA replication licensing factor MCM4	transcript=TGGT1_219700-t26_1 | gene=TGGT1_219700 | organism=Toxoplasma_gondii_GT1 | gene_product=MCM domain-containing protein [Source:UniProtKB/TrEMBL;Acc:S7V296] | transcript_product=putative DNA replication licensing factor MCM4 | location=TGGT1_chrXII:651605-660187(+) | protein_length=1014 | sequence_SO=chromosome | SO=protein_coding_gene | is_pseudo=false	[R].SRVSGPPDEHEVNAEDMEMQDEVTPLR.[G]	1xOxidation [M]; 1xTMTpro [N-Term]; 1xPhospho [S4(99.5)]	TGGT1_219700-t26_1-p1 1xPhospho [S10(99.5)]	3	High	1.11525e-08	9.56086e-05	1	1	TGGT1_219700-t26_1-p1	TGGT1_219700-t26_1-p1 [7-33]	1	3467.54	0.984	-0.02	1	35.7	36.2	5.9	8.34	NA	NA	34.2	37.2	NA	NA	34.2	38.4		High	7.761e-05	2.905e-09	7.15
54364	TGGT1_256980	glycerol-3-phosphate-acyltransferase	transcript=TGGT1_256980-t26_1 | gene=TGGT1_256980 | organism=Toxoplasma_gondii_GT1 | gene_product=PlsC domain-containing protein [Source:UniProtKB/TrEMBL;Acc:S7UZ60] | transcript_product=glycerol-3-phosphate-acyltransferase | location=TGGT1_chrVIIb:4232332-4243743(-) | protein_length=1002 | sequence_SO=chromosome | SO=protein_coding_gene | is_pseudo=false	[R].LDSSPLPTAAAPGGR.[T]	1xTMTpro [N-Term]; 1xPhospho [S3(99.6)]	TGGT1_256980-t26_1-p1 1xPhospho [S340(99.6)]	1	High	3.08745e-05	9.56086e-05	1	1	TGGT1_256980-t26_1-p1	TGGT1_256980-t26_1-p1 [338-352]	0	1793.91	0.664	-0.59	1	28.8	43.4	2.57	7.35	NA	NA	29.3	28.3	NA	NA	45.7	41.2		High	7.761e-05	1.505e-05	4.44
26858	TGGT1_218720	calcium-dependent protein kinase CDPK6	transcript=TGGT1_218720-t26_1 | gene=TGGT1_218720 | organism=Toxoplasma_gondii_GT1 | gene_product=Calcium-dependent protein kinase CDPK6 [Source:UniProtKB/TrEMBL;Acc:S7V1C9] | transcript_product=calcium-dependent protein kinase CDPK6 | location=TGGT1_chrXII:1292458-1303855(+) | protein_length=1477 | sequence_SO=chromosome | SO=protein_coding_gene | is_pseudo=false	[R].ENSQYPVSPTESSASTPR.[G]	1xTMTpro [N-Term]; 1xPhospho [S8(100)]	TGGT1_218720-t26_1-p1 1xPhospho [S787(100)]	4	High	3.70939e-05	9.56086e-05	1	1	TGGT1_218720-t26_1-p1	TGGT1_218720-t26_1-p1 [780-797]	0	2321.06	0.925	-0.11	1	30.5	33	6.73	9.95	NA	NA	32	29.1	NA	NA	30.8	35.4		High	7.761e-05	1.838e-05	3.69
26855	TGGT1_209060	thrombospondin type 1 domain-containing protein	transcript=TGGT1_209060-t26_1 | gene=TGGT1_209060 | organism=Toxoplasma_gondii_GT1 | gene_product=Thrombospondin type 1 domain-containing protein [Source:UniProtKB/TrEMBL;Acc:S7VS95] | transcript_product=thrombospondin type 1 domain-containing protein | location=TGGT1_chrIb:1036856-1043815(+) | protein_length=876 | sequence_SO=chromosome | SO=protein_coding_gene | is_pseudo=false	[R].ENSQENQNAEPGETHAETEEVESNASEK.[L]	1xTMTpro [K28]; 1xTMTpro [N-Term]; 2xPhospho [S23(100); S26(100)]	TGGT1_209060-t26_1-p1 2xPhospho [S847(100); S850(100)]	18	High	6.09927e-07	9.56086e-05	1	1	TGGT1_209060-t26_1-p1	TGGT1_209060-t26_1-p1 [825-852]	0	3855.64	1.171	0.23	1	39.2	33.5	13.36	7.44	NA	NA	35.7	43.1	NA	NA	35.3	31.8		High	7.761e-05	2.17e-07	5.71
78110	TGGT1_212990	hypothetical protein	transcript=TGGT1_212990-t26_1 | gene=TGGT1_212990 | organism=Toxoplasma_gondii_GT1 | gene_product=hypothetical protein | transcript_product=hypothetical protein | location=TGGT1_chrV:626448-635544(+) | protein_length=1064 | sequence_SO=chromosome | SO=protein_coding_gene | is_pseudo=false	[R].RLSGSSEGEPASDR.[V]	1xTMTpro [N-Term]; 2xPhospho [S3(99.6); S6(100)]	TGGT1_212990-t26_1-p1 2xPhospho [S44(99.6); S47(100)]	9	High	2.50982e-05	9.56086e-05	1	1	TGGT1_212990-t26_1-p1	TGGT1_212990-t26_1-p1 [42-55]	1	1911.82	1.037	0.05	1	67.1	64.7	0.91	9.34	NA	NA	66.7	67.5	NA	NA	69.1	60.6		High	7.761e-05	1.202e-05	4.49
78102	TGGT1_290630	AP2 domain transcription factor AP2IX-7	transcript=TGGT1_290630-t26_1 | gene=TGGT1_290630 | organism=Toxoplasma_gondii_GT1 | gene_product=AP2/ERF domain-containing protein [Source:UniProtKB/TrEMBL;Acc:S7UP83] | transcript_product=AP2 domain transcription factor AP2IX-7 | location=TGGT1_chrIX:3593432-3601897(+) | protein_length=2671 | sequence_SO=chromosome | SO=protein_coding_gene | is_pseudo=false	[R].RLSGGVVPGDEAGER.[R]	1xTMTpro [N-Term]; 1xPhospho [S3(100)]	TGGT1_290630-t26_1-p1 1xPhospho [S2547(100)]	6	High	9.33192e-07	9.56086e-05	1	1	TGGT1_290630-t26_1-p1	TGGT1_290630-t26_1-p1 [2545-2559]	1	1882.93	1.092	0.13	1	84.5	77.4	56.81	51.72	139.9	153.4	49.4	51	121.7	122.8	44.1	49.2		High	0.0001044	6.027e-07	5.43
94657	TGGT1_291180	hypothetical protein	transcript=TGGT1_291180-t26_1 | gene=TGGT1_291180 | organism=Toxoplasma_gondii_GT1 | gene_product=hypothetical protein | transcript_product=hypothetical protein | location=TGGT1_chrIX:4004987-4034538(-) | protein_length=5394 | sequence_SO=chromosome | SO=protein_coding_gene | is_pseudo=false	[R].SRWSSTSLSGYDQDGEETTR.[R]	1xTMTpro [N-Term]; 2xPhospho [S4(100); T6(99.4)]	TGGT1_291180-t26_1-p1 2xPhospho [S2588(100); T2590(99.4)]	3	High	2.60591e-05	9.56086e-05	1	1	TGGT1_291180-t26_1-p1	TGGT1_291180-t26_1-p1 [2585-2604]	1	2726.13	0.587	-0.77	1	19.6	33.4	68.19	78.78	35.8	43.3	10.2	10.7	77.3	68.2	16.3	11.7		High	0.0001044	1.542e-05	4.05
94658	TGGT1_291180	hypothetical protein	transcript=TGGT1_291180-t26_1 | gene=TGGT1_291180 | organism=Toxoplasma_gondii_GT1 | gene_product=hypothetical protein | transcript_product=hypothetical protein | location=TGGT1_chrIX:4004987-4034538(-) | protein_length=5394 | sequence_SO=chromosome | SO=protein_coding_gene | is_pseudo=false	[R].SRWSSTSLSGYDQDGEETTR.[R]	1xTMTpro [N-Term]; 3xPhospho [S4(99.4); S5(100); T6(100)]	TGGT1_291180-t26_1-p1 3xPhospho [S2588(99.4); S2589(100); T2590(100)]	5	High	7.61944e-06	9.56086e-05	1	1	TGGT1_291180-t26_1-p1	TGGT1_291180-t26_1-p1 [2585-2604]	1	2806.1	0.623	-0.68	1	26.1	41.8	7.25	26.3	24.8	27.4	NA	NA	34.6	50.5	NA	NA		High	0.0001044	4.646e-06	4.06
78098	TGGT1_261660	hypothetical protein	transcript=TGGT1_261660-t26_1 | gene=TGGT1_261660 | organism=Toxoplasma_gondii_GT1 | gene_product=hypothetical protein | transcript_product=hypothetical protein | location=TGGT1_chrVIIb:1573503-1583169(-) | protein_length=2679 | sequence_SO=chromosome | SO=protein_coding_gene | is_pseudo=false	[R].RLSGDGTLEPSDEGGDDGRK.[Q]	1xTMTpro [K20]; 1xTMTpro [N-Term]; 1xPhospho [S3(100)]	TGGT1_261660-t26_1-p1 1xPhospho [S551(100)]	5	High	3.32187e-05	9.56086e-05	1	1	TGGT1_261660-t26_1-p1	TGGT1_261660-t26_1-p1 [549-568]	2	2749.33	0.907	-0.14	1	108.1	119.2	2.92	4.12	NA	NA	110.3	105.9	NA	NA	122.7	115.8		High	7.761e-05	1.629e-05	4.22
78096	TGGT1_261660	hypothetical protein	transcript=TGGT1_261660-t26_1 | gene=TGGT1_261660 | organism=Toxoplasma_gondii_GT1 | gene_product=hypothetical protein | transcript_product=hypothetical protein | location=TGGT1_chrVIIb:1573503-1583169(-) | protein_length=2679 | sequence_SO=chromosome | SO=protein_coding_gene | is_pseudo=false	[R].RLSGDGTLEPSDEGGDDGR.[K]	1xTMTpro [N-Term]; 1xPhospho [S3(100)]	TGGT1_261660-t26_1-p1 1xPhospho [S551(100)]	5	High	8.46393e-07	9.56086e-05	1	1	TGGT1_261660-t26_1-p1	TGGT1_261660-t26_1-p1 [549-567]	1	2317.03	0.927	-0.11	1	16.1	17.4	4.67	22.35	NA	NA	16.6	15.6	NA	NA	14.8	20.4		High	7.761e-05	3.091e-07	5.17
26820	TGGT1_291980	HECT-domain (ubiquitin-transferase) domain-containing protein	transcript=TGGT1_291980-t26_1 | gene=TGGT1_291980 | organism=Toxoplasma_gondii_GT1 | gene_product=HECT domain-containing protein [Source:UniProtKB/TrEMBL;Acc:S7W439] | transcript_product=HECT-domain (ubiquitin-transferase) domain-containing protein | location=TGGT1_chrIX:4247476-4268188(-) | protein_length=4151 | sequence_SO=chromosome | SO=protein_coding_gene | is_pseudo=false	[K].ENSDLSSTPPLGDK.[M]	1xTMTpro [K14]; 1xTMTpro [N-Term]; 1xPhospho [S/T]		1	High	1.02028e-05	9.56086e-05	1	1	TGGT1_291980-t26_1-p1	TGGT1_291980-t26_1-p1 [1416-1429]	0	2148.07	0.834	-0.26	1	34.5	41.4	31.36	12.44	43.2	27.5	NA	NA	37.9	45.2	NA	NA		High	0.0001044	6.174e-06	3.41
26818	TGGT1_264430	hypothetical protein	transcript=TGGT1_264430-t26_1 | gene=TGGT1_264430 | organism=Toxoplasma_gondii_GT1 | gene_product=hypothetical protein | transcript_product=hypothetical protein | location=TGGT1_chrIX:2067836-2071288(+) | protein_length=1151 | sequence_SO=chromosome | SO=protein_coding_gene | is_pseudo=false	[R].ENSDAGVGGEDRK.[Q]	1xTMTpro [K13]; 1xTMTpro [N-Term]; 1xPhospho [S3(100)]	TGGT1_264430-t26_1-p1 1xPhospho [S351(100)]	4	High	1.89067e-05	9.56086e-05	1	1	TGGT1_264430-t26_1-p1	TGGT1_264430-t26_1-p1 [349-361]	1	2021.98	1.04	0.06	1	91	87.4	21.26	21.41	87.1	90.4	132.2	91.5	65.4	81.6	93.7	109.7		High	7.761e-05	8.835e-06	3.7
26817	TGGT1_264430	hypothetical protein	transcript=TGGT1_264430-t26_1 | gene=TGGT1_264430 | organism=Toxoplasma_gondii_GT1 | gene_product=hypothetical protein | transcript_product=hypothetical protein | location=TGGT1_chrIX:2067836-2071288(+) | protein_length=1151 | sequence_SO=chromosome | SO=protein_coding_gene | is_pseudo=false	[R].ENSDAGVGGEDR.[K]	1xTMTpro [N-Term]; 1xPhospho [S3(100)]	TGGT1_264430-t26_1-p1 1xPhospho [S351(100)]	7	High	2.5805e-05	9.56086e-05	1	1	TGGT1_264430-t26_1-p1	TGGT1_264430-t26_1-p1 [349-360]	0	1589.68	1.139	0.19	1	113.1	99.3	35.35	40.86	89.2	66.7	143.4	144.5	54.3	76.1	137.6	129.6		High	7.761e-05	1.24e-05	3.99
26809	TGGT1_205150	ACR, YagE family COG1723 domain-containing protein	transcript=TGGT1_205150-t26_1 | gene=TGGT1_205150 | organism=Toxoplasma_gondii_GT1 | gene_product=DUF155 domain-containing protein [Source:UniProtKB/TrEMBL;Acc:S7W2Z4] | transcript_product=ACR, YagE family COG1723 domain-containing protein | location=TGGT1_chrVIIa:1489074-1496506(+) | protein_length=819 | sequence_SO=chromosome | SO=protein_coding_gene | is_pseudo=false	[R].ENSAHEEDSTLR.[R]	1xTMTpro [N-Term]; 1xPhospho [S3(100)]	TGGT1_205150-t26_1-p1 1xPhospho [S28(100)]	18	High	4.83296e-05	9.56086e-05	1	1	TGGT1_205150-t26_1-p1	TGGT1_205150-t26_1-p1 [26-37]	0	1771.78	0.697	-0.52	1	47.6	68.4	55.15	25.41	26.3	30.2	83.3	75	37.8	68.4	68.3	69.7		High	7.761e-05	2.453e-05	4.43
78095	TGGT1_310802	CRAL/TRIO domain-containing protein	transcript=TGGT1_310802-t26_1 | gene=TGGT1_310802 | organism=Toxoplasma_gondii_GT1 | gene_product=CRAL-TRIO domain-containing protein [Source:UniProtKB/TrEMBL;Acc:S7W265] | transcript_product=CRAL/TRIO domain-containing protein | location=TGGT1_chrXI:1562990-1566501(+) | protein_length=499 | sequence_SO=chromosome | SO=protein_coding_gene | is_pseudo=false	[K].RLSFLEGEEETEPETAR.[A]	1xTMTpro [N-Term]; 1xPhospho [S3(100)]	TGGT1_310802-t26_1-p1 1xPhospho [S162(100)]	6	High	9.56643e-07	9.56086e-05	1	1	TGGT1_310802-t26_1-p1	TGGT1_310802-t26_1-p1 [160-176]	1	2377.12	1.029	0.04	1	216.7	210.7	21.05	19.69	256.1	248.3	163.6	189.2	235.5	248.8	160.6	188.6		High	7.761e-05	5.969e-07	5.6
78111	TGGT1_212990	hypothetical protein	transcript=TGGT1_212990-t26_1 | gene=TGGT1_212990 | organism=Toxoplasma_gondii_GT1 | gene_product=hypothetical protein | transcript_product=hypothetical protein | location=TGGT1_chrV:626448-635544(+) | protein_length=1064 | sequence_SO=chromosome | SO=protein_coding_gene | is_pseudo=false	[R].RLSGSSEGEPASDR.[V]	1xTMTpro [N-Term]; 3xPhospho [S3(100); S5(100); S6(100)]	TGGT1_212990-t26_1-p1 3xPhospho [S44(100); S46(100); S47(100)]	16	High	1.93142e-05	9.56086e-05	1	1	TGGT1_212990-t26_1-p1	TGGT1_212990-t26_1-p1 [42-55]	1	1991.78	1.548	0.63	1	116.4	75.2	11.93	15.53	120.8	125.6	112.3	94.8	99.2	75.2	72.5	75.3		High	7.761e-05	9.045e-06	4.87
78173	TGGT1_284645	hypothetical protein	transcript=TGGT1_284645-t26_1 | gene=TGGT1_284645 | organism=Toxoplasma_gondii_GT1 | gene_product=hypothetical protein | transcript_product=hypothetical protein | location=TGGT1_chrV:2487979-2497894(+) | protein_length=2811 | sequence_SO=chromosome | SO=protein_coding_gene | is_pseudo=false	[R].RLSPSDAAQHSEGLQAR.[S]	1xTMTpro [N-Term]; 1xPhospho [S3(100)]	TGGT1_284645-t26_1-p1 1xPhospho [S1684(100)]	3	High	6.51164e-05	9.56086e-05	1	1	TGGT1_284645-t26_1-p1	TGGT1_284645-t26_1-p1 [1682-1698]	1	2207.09	1.01	0.01	1	49	48.5	1.68	6.18	NA	NA	48.4	49.6	NA	NA	46.5	50.7		High	7.761e-05	3.397e-05	3.43
78124	TGGT1_289350	ATP-binding cassette G family transporter ABCG84	transcript=TGGT1_289350-t26_1 | gene=TGGT1_289350 | organism=Toxoplasma_gondii_GT1 | gene_product=ABC transporter domain-containing protein [Source:UniProtKB/TrEMBL;Acc:S7VYI6] | transcript_product=ATP-binding cassette G family transporter ABCG84 | location=TGGT1_chrIX:3026173-3037688(+) | protein_length=766 | sequence_SO=chromosome | SO=protein_coding_gene | is_pseudo=false	[R].RLSLDGATAEPSSGGALRPQSDADMLER.[G]	1xOxidation [M25]; 1xTMTpro [N-Term]; 1xPhospho [S3(100)]	TGGT1_289350-t26_1-p1 1xPhospho [S47(100)]	4	High	2.15902e-06	9.56086e-05	1	1	TGGT1_289350-t26_1-p1	TGGT1_289350-t26_1-p1 [45-72]	1	3300.59	1.149	0.2	1	96.3	83.8	85.88	85.38	38.5	32.5	241.1	241.8	27.4	35.7	218.6	196.8		High	7.761e-05	8.491e-07	5.68
26958	TGGT1_247000	tetratricopeptide repeat-containing protein	transcript=TGGT1_247000-t26_1 | gene=TGGT1_247000 | organism=Toxoplasma_gondii_GT1 | gene_product=Tetratricopeptide repeat-containing protein [Source:UniProtKB/TrEMBL;Acc:S7WH26] | transcript_product=tetratricopeptide repeat-containing protein | location=TGGT1_chrXII:3025928-3029976(+) | protein_length=887 | sequence_SO=chromosome | SO=protein_coding_gene | is_pseudo=false	[K].EPEDAEEEEERPQSK.[K]	1xTMTpro [K15]; 1xTMTpro [N-Term]; 1xPhospho [S14(100)]	TGGT1_247000-t26_1-p1 1xPhospho [S134(100)]	23	High	1.03212e-05	9.56086e-05	1	1	TGGT1_247000-t26_1-p1	TGGT1_247000-t26_1-p1 [121-135]	0	2490.15	1.065	0.09	1	148.4	139.4	51.71	60.68	78	99.7	220.9	239.8	88.3	59.2	244.6	220.1		High	7.761e-05	4.598e-06	4.4
94347	TGGT1_221280	hypothetical protein	transcript=TGGT1_221280-t26_1 | gene=TGGT1_221280 | organism=Toxoplasma_gondii_GT1 | gene_product=hypothetical protein | transcript_product=hypothetical protein | location=TGGT1_chrII:186622-203205(+) | protein_length=4037 | sequence_SO=chromosome | SO=protein_coding_gene | is_pseudo=false	[R].SRSQPSLNFDGEAR.[R]	1xTMTpro [N-Term]; 1xPhospho [S3(100)]	TGGT1_221280-t26_1-p1 1xPhospho [S1675(100)]	5	High	3.6914e-05	9.56086e-05	1	1	TGGT1_221280-t26_1-p1	TGGT1_221280-t26_1-p1 [1673-1686]	1	1947.92	0.983	-0.03	1	76.8	78.2	40.31	37.01	121.1	104.8	54.3	56.4	109.7	105.8	53.3	57.8		High	7.761e-05	1.826e-05	4.11
94370	TGGT1_319850	splicing factor U2AF family SnRNP auxilary factor large subunit, RRM domain-containing protein	transcript=TGGT1_319850-t26_1 | gene=TGGT1_319850 | organism=Toxoplasma_gondii_GT1 | gene_product=RRM domain-containing protein [Source:UniProtKB/TrEMBL;Acc:S7UK80] | transcript_product=splicing factor U2AF family SnRNP auxilary factor large subunit, RRM domain-containing protein | location=TGGT1_chrIV:689661-691811(+) | protein_length=495 | sequence_SO=chromosome | SO=protein_coding_gene | is_ps…	[R].SRSRSPGGGGAAGGGK.[G]	1xTMTpro [K16]; 1xTMTpro [N-Term]; 3xPhospho [S1(100); S3(100); S5(100)]	TGGT1_319850-t26_1-p1 3xPhospho [S163(100); S165(100); S167(100)]	12	High	4.5889e-06	9.56086e-05	1	1	TGGT1_319850-t26_1-p1	TGGT1_319850-t26_1-p1 [163-178]	2	2207	0.973	-0.04	1	235.2	241.7	49.52	40.03	344.8	397.4	141.1	160.5	376.6	327.4	168.4	178.4		High	7.761e-05	1.916e-06	6.31
27130	TGGT1_230940	hypothetical protein	transcript=TGGT1_230940-t26_1 | gene=TGGT1_230940 | organism=Toxoplasma_gondii_GT1 | gene_product=hypothetical protein | transcript_product=hypothetical protein | location=TGGT1_chrVIII:1112065-1119747(+) | protein_length=1523 | sequence_SO=chromosome | SO=protein_coding_gene | is_pseudo=false	[R].EPSPIAAPAVK.[S]	1xTMTpro [K11]; 1xTMTpro [N-Term]; 1xPhospho [S3(100)]	TGGT1_230940-t26_1-p1 1xPhospho [S373(100)]	2	High	3.33269e-05	9.56086e-05	1	1	TGGT1_230940-t26_1-p1	TGGT1_230940-t26_1-p1 [371-381]	0	1767.99	1.23	0.3	1	110.6	89.9	4.49	11.59	107.2	114.2	NA	NA	97.6	82.8	NA	NA		High	0.0001044	1.964e-05	4.08
94386	TGGT1_232670	hypothetical protein	transcript=TGGT1_232670-t26_1 | gene=TGGT1_232670 | organism=Toxoplasma_gondii_GT1 | gene_product=hypothetical protein | transcript_product=hypothetical protein | location=TGGT1_chrVIII:2211357-2214760(+) | protein_length=720 | sequence_SO=chromosome | SO=protein_coding_gene | is_pseudo=false	[R].SRSSDELCPDADAAR.[G]	1xMethylthio [C8]; 1xTMTpro [N-Term]; 1xPhospho [S]	TGGT1_232670-t26_1-p1 1xMethylthio [C27]	11	High	3.64385e-05	9.56086e-05	1	1	TGGT1_232670-t26_1-p1	TGGT1_232670-t26_1-p1 [20-34]	1	2022.86	1.451	0.54	1	43.4	29.9	30.49	49.89	38.3	25.7	54.6	49.2	13.6	22.4	39.9	46.8		High	7.761e-05	1.803e-05	3.46
94400	TGGT1_244460	hypothetical protein	transcript=TGGT1_244460-t26_1 | gene=TGGT1_244460 | organism=Toxoplasma_gondii_GT1 | gene_product=hypothetical protein | transcript_product=hypothetical protein | location=TGGT1_chrVI:3193064-3199038(-) | protein_length=1239 | sequence_SO=chromosome | SO=protein_coding_gene | is_pseudo=false	[R].SRSSGSGAGGGGASAAAR.[K]	1xTMTpro [N-Term]; 2xPhospho [S3(100); S6(100)]	TGGT1_244460-t26_1-p1 2xPhospho [S915(100); S918(100)]	8	High	4.41045e-06	9.56086e-05	1	1	TGGT1_244460-t26_1-p1	TGGT1_244460-t26_1-p1 [913-930]	1	1927.83	0.698	-0.52	1	38.2	54.7	18.71	21.67	NA	NA	43.6	33.4	NA	NA	46.8	63.8		High	7.761e-05	1.835e-06	5.1
27109	TGGT1_203320	zinc finger in N-recognin protein	transcript=TGGT1_203320-t26_1 | gene=TGGT1_203320 | organism=Toxoplasma_gondii_GT1 | gene_product=E3 ubiquitin-protein ligase [Source:UniProtKB/TrEMBL;Acc:S7WAU3] | transcript_product=zinc finger in N-recognin protein | location=TGGT1_chrVIIa:2474491-2497953(-) | protein_length=5382 | sequence_SO=chromosome | SO=protein_coding_gene | is_pseudo=false	[K].EPSDPTPAPPCVSPR.[S]	1xMethylthio [C11]; 1xTMTpro [N-Term]; 1xPhospho [S13(100)]	TGGT1_203320-t26_1-p1 1xMethylthio [C2307]; 1xPhospho [S2309(100)]	1	High	0.000148435	9.56086e-05	1	1	TGGT1_203320-t26_1-p1	TGGT1_203320-t26_1-p1 [2297-2311]	0	1979.89	0.691	-0.53	1	30.2	43.7	20.68	25.56	35	26.1	NA	NA	36.4	52.5	NA	NA		High	0.0001044	8.898e-05	2.79
54254	TGGT1_278720	hypothetical protein	transcript=TGGT1_278720-t26_1 | gene=TGGT1_278720 | organism=Toxoplasma_gondii_GT1 | gene_product=hypothetical protein | transcript_product=hypothetical protein | location=TGGT1_chrXII:5836036-5838003(-) | protein_length=655 | sequence_SO=chromosome | SO=protein_coding_gene | is_pseudo=false	[R].IDNVFQDGEAARPPSPAPK.[K]	1xTMTpro [K19]; 1xTMTpro [N-Term]; 1xPhospho [S15(100)]	TGGT1_278720-t26_1-p1 1xPhospho [S508(100)]	1	High	0.000106404	9.56086e-05	1	1	TGGT1_278720-t26_1-p1	TGGT1_278720-t26_1-p1 [494-512]	0	2697.39	1.248	0.32	1	128.4	102.8	10.75	8.42	NA	NA	138.5	119	NA	NA	96.9	109.1		High	7.761e-05	5.86e-05	2.98
94441	TGGT1_251510	Ulp1 protease family, C-terminal catalytic domain-containing protein	transcript=TGGT1_251510-t26_1 | gene=TGGT1_251510 | organism=Toxoplasma_gondii_GT1 | gene_product=ULP_PROTEASE domain-containing protein [Source:UniProtKB/TrEMBL;Acc:S7V0G6] | transcript_product=Ulp1 protease family, C-terminal catalytic domain-containing protein | location=TGGT1_chrXII:5358119-5365405(-) | protein_length=1770 | sequence_SO=chromosome | SO=protein_coding_gene | is_pseudo=false	[R].SRSTDFQDSEDFSK.[A]	1xTMTpro [K14]; 1xTMTpro [N-Term]; 1xPhospho [S/T]		3	High	3.23134e-05	9.56086e-05	1	1	TGGT1_251510-t26_1-p1	TGGT1_251510-t26_1-p1 [839-852]	1	2337.09	1.31	0.39	1	57.6	44	43.35	50.89	45	28.7	82.3	73.7	25	29.9	64.7	74.2		High	7.761e-05	1.583e-05	3.62
94444	TGGT1_246590	hypothetical protein	transcript=TGGT1_246590-t26_1 | gene=TGGT1_246590 | organism=Toxoplasma_gondii_GT1 | gene_product=hypothetical protein | transcript_product=hypothetical protein | location=TGGT1_chrXII:2799381-2801736(+) | protein_length=447 | sequence_SO=chromosome | SO=protein_coding_gene | is_pseudo=false	[R].SRSTDTGDPEWQNR.[Q]	1xTMTpro [N-Term]; 1xPhospho [S3(100)]	TGGT1_246590-t26_1-p1 1xPhospho [S378(100)]	4	High	4.84851e-05	9.56086e-05	1	1	TGGT1_246590-t26_1-p1	TGGT1_246590-t26_1-p1 [376-389]	1	2032.9	0.904	-0.15	1	50.1	55.4	11.85	6.94	54.6	44.2	56	46	57	50.7	59.6	53.9		High	7.761e-05	2.459e-05	3.5
78138	TGGT1_249260	putative cell-cycle-associated protein kinase CDK	transcript=TGGT1_249260-t26_1 | gene=TGGT1_249260 | organism=Toxoplasma_gondii_GT1 | gene_product=Protein kinase domain-containing protein [Source:UniProtKB/TrEMBL;Acc:S7W928] | transcript_product=putative cell-cycle-associated protein kinase CDK | location=TGGT1_chrXII:4333758-4345741(-) | protein_length=1910 | sequence_SO=chromosome | SO=protein_coding_gene | is_pseudo=false	[K].RLSLPSVDSQLSSPDGGTPGVGR.[R]	1xTMTpro [N-Term]; 1xPhospho [S3(100)]	TGGT1_249260-t26_1-p1 1xPhospho [S1594(100)]	1	High	1.14761e-06	9.56086e-05	1	1	TGGT1_249260-t26_1-p1	TGGT1_249260-t26_1-p1 [1592-1614]	1	2666.35	1.048	0.07	1	64.5	61.6	1.31	4.9	NA	NA	63.9	65.1	NA	NA	63.8	59.5		High	7.761e-05	4.292e-07	6.05
27056	TGGT1_316520	1,4-alpha-glucan-branching enzyme	transcript=TGGT1_316520-t26_1 | gene=TGGT1_316520 | organism=Toxoplasma_gondii_GT1 | gene_product=Aamy domain-containing protein [Source:UniProtKB/TrEMBL;Acc:S7UM15] | transcript_product=1,4-alpha-glucan-branching enzyme | location=TGGT1_chrXI:5308256-5318090(-) | protein_length=972 | sequence_SO=chromosome | SO=protein_coding_gene | is_pseudo=false	[K].EPPHTNMFDCAVAADSPR.[G]	1xOxidation [M7]; 1xMethylthio [C10]; 1xTMTpro [N-Term]; 1xPhospho [S16(100)]	TGGT1_316520-t26_1-p1 1xMethylthio [C51]; 1xPhospho [S57(100)]	8	High	1.56573e-08	9.56086e-05	1	1	TGGT1_316520-t26_1-p1	TGGT1_316520-t26_1-p1 [42-59]	0	2404.01	1.107	0.15	1	209.7	189.5	19.77	25.24	182.6	163.3	244.6	240.9	153.2	154	244.8	233.2		High	0.0001044	1.133e-08	5.79
27055	TGGT1_316520	1,4-alpha-glucan-branching enzyme	transcript=TGGT1_316520-t26_1 | gene=TGGT1_316520 | organism=Toxoplasma_gondii_GT1 | gene_product=Aamy domain-containing protein [Source:UniProtKB/TrEMBL;Acc:S7UM15] | transcript_product=1,4-alpha-glucan-branching enzyme | location=TGGT1_chrXI:5308256-5318090(-) | protein_length=972 | sequence_SO=chromosome | SO=protein_coding_gene | is_pseudo=false	[K].EPPHTNMFDCAVAADSPR.[G]	1xMethylthio [C10]; 1xTMTpro [N-Term]; 1xPhospho [S16(100)]	TGGT1_316520-t26_1-p1 1xMethylthio [C51]; 1xPhospho [S57(100)]	6	High	2.04819e-09	9.56086e-05	1	1	TGGT1_316520-t26_1-p1	TGGT1_316520-t26_1-p1 [42-59]	0	2388.01	1.01	0.01	1	374.1	370.5	6.17	6.28	358.3	352.8	399.5	390.5	328	368.8	372.2	377.4		High	7.761e-05	4.668e-10	7.8
94468	TGGT1_224260	PHD-finger domain-containing protein	transcript=TGGT1_224260-t26_1 | gene=TGGT1_224260 | organism=Toxoplasma_gondii_GT1 | gene_product=PHD-finger domain-containing protein [Source:UniProtKB/TrEMBL;Acc:S7WBT2] | transcript_product=PHD-finger domain-containing protein | location=TGGT1_chrX:3059832-3081619(-) | protein_length=5658 | sequence_SO=chromosome | SO=protein_coding_gene | is_pseudo=false	[R].SRSVEENLTER.[A]	1xTMTpro [N-Term]; 1xPhospho [S3(100)]	TGGT1_224260-t26_1-p1 1xPhospho [S169(100)]	17	High	4.39536e-05	9.56086e-05	1	1	TGGT1_224260-t26_1-p1	TGGT1_224260-t26_1-p1 [167-177]	1	1703.83	0.719	-0.48	1	198.8	276.6	75.5	70.11	89.6	92.3	428.4	439.8	123.3	141.4	541.3	540.9		High	0.0001044	2.578e-05	3.62
27043	TGGT1_234270	hypothetical protein	transcript=TGGT1_234270-t26_1 | gene=TGGT1_234270 | organism=Toxoplasma_gondii_GT1 | gene_product=hypothetical protein | transcript_product=hypothetical protein | location=TGGT1_chrX:4150640-4163518(+) | protein_length=2027 | sequence_SO=chromosome | SO=protein_coding_gene | is_pseudo=false	[K].EPLTPAGDGEDSEGQRRPEGESPGAGR.[R]	1xTMTpro [N-Term]; 1xPhospho [S12(99.4)]	TGGT1_234270-t26_1-p1 1xPhospho [S851(99.4)]	10	High	9.27233e-06	9.56086e-05	1	1	TGGT1_234270-t26_1-p1	TGGT1_234270-t26_1-p1 [840-866]	1	3135.43	1.077	0.11	1	58.7	54.5	16.47	16.19	NA	NA	52.2	66	NA	NA	48.5	61.1		High	7.761e-05	4.093e-06	4.07
27042	TGGT1_234270	hypothetical protein	transcript=TGGT1_234270-t26_1 | gene=TGGT1_234270 | organism=Toxoplasma_gondii_GT1 | gene_product=hypothetical protein | transcript_product=hypothetical protein | location=TGGT1_chrX:4150640-4163518(+) | protein_length=2027 | sequence_SO=chromosome | SO=protein_coding_gene | is_pseudo=false	[K].EPLTPAGDGEDSEGQR.[R]	1xTMTpro [N-Term]; 1xPhospho [T4(100)]	TGGT1_234270-t26_1-p1 1xPhospho [T843(100)]	7	High	7.20266e-05	9.56086e-05	1	1	TGGT1_234270-t26_1-p1	TGGT1_234270-t26_1-p1 [840-855]	0	2041.9	0.854	-0.23	1	17.6	20.5	9.62	21.6	NA	NA	18.8	16.4	NA	NA	17.6	24		High	0.0001044	4.218e-05	2.98
78137	TGGT1_238230	Ser/Thr phosphatase family protein	transcript=TGGT1_238230-t26_1 | gene=TGGT1_238230 | organism=Toxoplasma_gondii_GT1 | gene_product=DBR1 domain-containing protein [Source:UniProtKB/TrEMBL;Acc:S7URU5] | transcript_product=Ser/Thr phosphatase family protein | location=TGGT1_chrVI:140425-147185(+) | protein_length=496 | sequence_SO=chromosome | SO=protein_coding_gene | is_pseudo=false	[K].RLSLNSVGAAAAAEDAR.[R]	1xTMTpro [N-Term]; 1xPhospho [S3(100)]	TGGT1_238230-t26_1-p1 1xPhospho [S350(100)]	3	High	3.46511e-08	9.56086e-05	1	1	TGGT1_238230-t26_1-p1	TGGT1_238230-t26_1-p1 [348-364]	1	2056.05	0.824	-0.28	1	84.6	102.7	67.57	51.5	43.2	44.6	160.7	173.2	56.1	70.4	173.4	149.9		High	7.761e-05	9.867e-09	6.5
27032	TGGT1_223880	zinc finger, C3HC4 type (RING finger) domain-containing protein	transcript=TGGT1_223880-t26_1 | gene=TGGT1_223880 | organism=Toxoplasma_gondii_GT1 | gene_product=RING-type domain-containing protein [Source:UniProtKB/TrEMBL;Acc:S7UVV4] | transcript_product=zinc finger, C3HC4 type (RING finger) domain-containing protein | location=TGGT1_chrX:3392353-3413350(-) | protein_length=3893 | sequence_SO=chromosome | SO=protein_coding_gene | is_pseudo=false	[K].EPLASSHSSSPLQHEAPPAAQSPR.[E]	1xTMTpro [N-Term]; 1xPhospho [S22(100)]	TGGT1_223880-t26_1-p1 1xPhospho [S1493(100)]	2	High	2.36637e-05	9.56086e-05	1	1	TGGT1_223880-t26_1-p1	TGGT1_223880-t26_1-p1 [1472-1495]	0	2865.39	1.189	0.25	1	34.6	29.1	17.24	6.09	NA	NA	30.6	39.1	NA	NA	30.4	27.9		High	7.761e-05	1.127e-05	3.16
54298	TGGT1_226660	hypothetical protein	transcript=TGGT1_226660-t26_1 | gene=TGGT1_226660 | organism=Toxoplasma_gondii_GT1 | gene_product=hypothetical protein | transcript_product=hypothetical protein | location=TGGT1_chrX:1361506-1380909(+) | protein_length=3736 | sequence_SO=chromosome | SO=protein_coding_gene | is_pseudo=false	[R].LDSDGLGPLER.[S]	1xTMTpro [N-Term]; 1xPhospho [S3(100)]	TGGT1_226660-t26_1-p1 1xPhospho [S1957(100)]	4	High	9.49396e-05	9.56086e-05	1	1	TGGT1_226660-t26_1-p1	TGGT1_226660-t26_1-p1 [1955-1965]	0	1555.77	1.238	0.31	1	50	40.4	7.45	24.86	47.4	52.7	NA	NA	48.2	33.8	NA	NA		High	0.0001044	5.575e-05	4.1
54301	TGGT1_315760	AP2 domain transcription factor AP2XI-4	transcript=TGGT1_315760-t26_1 | gene=TGGT1_315760 | organism=Toxoplasma_gondii_GT1 | gene_product=AP2/ERF domain-containing protein [Source:UniProtKB/TrEMBL;Acc:S7VUV5] | transcript_product=AP2 domain transcription factor AP2XI-4 | location=TGGT1_chrXI:4894138-4907734(+) | protein_length=3229 | sequence_SO=chromosome | SO=protein_coding_gene | is_pseudo=false	[R].LDSDSPHMDVPSR.[R]	1xTMTpro [N-Term]; 1xPhospho [S5(100)]	TGGT1_315760-t26_1-p1 1xPhospho [S1777(100)]	4	High	1.10064e-05	9.56086e-05	1	1	TGGT1_315760-t26_1-p1	TGGT1_315760-t26_1-p1 [1773-1785]	0	1839.83	1.188	0.25	1	25.9	21.8	36.45	32.07	28.9	39.8	23.2	16.5	28.3	28.4	16.7	15.4		High	0.0001044	6.646e-06	4.09
54303	TGGT1_305180	Na+/H+ exchanger NHE3	transcript=TGGT1_305180-t26_1 | gene=TGGT1_305180 | organism=Toxoplasma_gondii_GT1 | gene_product=Na_H_Exchanger domain-containing protein [Source:UniProtKB/TrEMBL;Acc:S7UI51] | transcript_product=Na+/H+ exchanger NHE3 | location=TGGT1_chrIX:5043402-5051565(-) | protein_length=1565 | sequence_SO=chromosome | SO=protein_coding_gene | is_pseudo=false	[R].LDSDVELIR.[T]	1xTMTpro [N-Term]; 1xPhospho [S3(100)]	TGGT1_305180-t26_1-p1 1xPhospho [S1162(100)]	2	High	0.000101372	9.56086e-05	1	1	TGGT1_305180-t26_1-p1	TGGT1_305180-t26_1-p1 [1160-1168]	0	1443.74	0.833	-0.26	1	88.4	106.1	76.18	66.02	206.8	171.1	45.7	34.6	191.5	205.4	50	58.8		High	0.0001044	5.969e-05	3.42
26988	TGGT1_311860	hypothetical protein	transcript=TGGT1_311860-t26_1 | gene=TGGT1_311860 | organism=Toxoplasma_gondii_GT1 | gene_product=hypothetical protein | transcript_product=hypothetical protein | location=TGGT1_chrXI:2284638-2295037(+) | protein_length=3209 | sequence_SO=chromosome | SO=protein_coding_gene | is_pseudo=false	[R].EPGAEASSSFQHVETEQPARSSTDEASDK.[G]	1xTMTpro [K29]; 1xTMTpro [N-Term]; 3xPhospho [S22(100); T23(100); S27(100)]	TGGT1_311860-t26_1-p1 3xPhospho [S910(100); T911(100); S915(100)]	1	High	3.83746e-07	9.56086e-05	1	1	TGGT1_311860-t26_1-p1	TGGT1_311860-t26_1-p1 [889-917]	1	3925.67	0.92	-0.12	1	33.7	36.6	6.15	45.92	35.2	32.3	NA	NA	51.3	26.2	NA	NA		High	0.0001044	2.539e-07	5.32
78127	TGGT1_290170	kelch repeat domain containing/Serine/threonine protein phosphatase protein	transcript=TGGT1_290170-t26_1 | gene=TGGT1_290170 | organism=Toxoplasma_gondii_GT1 | gene_product=Serine/threonine-protein phosphatase [Source:UniProtKB/TrEMBL;Acc:S7UP60] | transcript_product=kelch repeat domain containing/Serine/threonine protein phosphatase protein | location=TGGT1_chrIX:3424119-3434248(-) | protein_length=934 | sequence_SO=chromosome | SO=protein_coding_gene | is_pseudo=false	[R].RISIDRLEEEGK.[K]	1xTMTpro [K12]; 1xTMTpro [N-Term]; 1xPhospho [S3(100)]	TGGT1_290170-t26_1-p1 1xPhospho [S518(100)]	3	High	0.00014304	9.56086e-05	1	1	TGGT1_290170-t26_1-p1	TGGT1_290170-t26_1-p1 [516-527]	2	2133.16	0.651	-0.62	0.0928133	307.4	471.8	5.11	7.39	NA	NA	296.4	318.7	NA	NA	447.8	497.1		High	7.761e-05	8.173e-05	3.99
94551	TGGT1_211600	hypothetical protein	transcript=TGGT1_211600-t26_1 | gene=TGGT1_211600 | organism=Toxoplasma_gondii_GT1 | gene_product=hypothetical protein | transcript_product=hypothetical protein | location=TGGT1_chrIV:1599766-1607388(+) | protein_length=2243 | sequence_SO=chromosome | SO=protein_coding_gene | is_pseudo=false	[R].SRTIVDEVYGEK.[D]	1xTMTpro [K12]; 1xTMTpro [N-Term]; 1xPhospho [T3(99.7)]	TGGT1_211600-t26_1-p1 1xPhospho [T2054(99.7)]	1	High	2.12405e-05	9.56086e-05	1	1	TGGT1_211600-t26_1-p1	TGGT1_211600-t26_1-p1 [2052-2063]	1	2084.09	0.999	0	1	47.1	47.1	6.72	0.77	NA	NA	44.9	49.4	NA	NA	46.8	47.3		High	7.761e-05	1.003e-05	4.24
94576	TGGT1_313020	STAS domain-containing protein	transcript=TGGT1_313020-t26_1 | gene=TGGT1_313020 | organism=Toxoplasma_gondii_GT1 | gene_product=STAS domain-containing protein [Source:UniProtKB/TrEMBL;Acc:S7UTK8] | transcript_product=STAS domain-containing protein | location=TGGT1_chrXI:3003249-3012926(+) | protein_length=1120 | sequence_SO=chromosome | SO=protein_coding_gene | is_pseudo=false	[R].SRTQEGTLGPFLEPNTVAGEGEGAPVTATTR.[R]	1xTMTpro [N-Term]; 1xPhospho [S/T]		2	High	2.37323e-09	9.56086e-05	1	1	TGGT1_313020-t26_1-p1	TGGT1_313020-t26_1-p1 [906-936]	1	3527.73	1.028	0.04	1	74.4	72.4	17.5	13.95	79	98	70.1	67.7	84.6	79.9	64.1	65.6		High	7.761e-05	5.477e-10	7.8
26968	TGGT1_232050	DnaJ domain-containing protein	transcript=TGGT1_232050-t26_1 | gene=TGGT1_232050 | organism=Toxoplasma_gondii_GT1 | gene_product=J domain-containing protein [Source:UniProtKB/TrEMBL;Acc:S7V2Q7] | transcript_product=DnaJ domain-containing protein | location=TGGT1_chrVIII:1780837-1792241(-) | protein_length=869 | sequence_SO=chromosome | SO=protein_coding_gene | is_pseudo=false	[K].EPENGDDEDSEEEGEEEEVPVEEEEGSK.[D]	1xTMTpro [K28]; 1xTMTpro [N-Term]; 1xPhospho [S10(100)]	TGGT1_232050-t26_1-p1 1xPhospho [S649(100)]	4	High	2.81142e-07	9.56086e-05	1	1	TGGT1_232050-t26_1-p1	TGGT1_232050-t26_1-p1 [640-667]	0	3838.58	1.189	0.25	1	18.8	15.8	2.06	4.85	NA	NA	18.6	19.1	NA	NA	16.4	15.3		High	7.761e-05	9.426e-08	4.58
27037	TGGT1_203310	dense granule protein GRA7	transcript=TGGT1_203310-t26_1 | gene=TGGT1_203310 | organism=Toxoplasma_gondii_GT1 | gene_product=Dense granule protein GRA7 [Source:UniProtKB/TrEMBL;Acc:A0A125YVB8] | transcript_product=dense granule protein GRA7 | location=TGGT1_chrVIIa:2502941-2503651(+) | protein_length=236 | sequence_SO=chromosome | SO=protein_coding_gene | is_pseudo=false	[R].EPLETEPDEQEEVHFR.[K]	1xTMTpro [N-Term]; 1xPhospho [T5(100)]	TGGT1_203310-t26_1-p1 1xPhospho [T90(100)]	7	High	1.08304e-06	9.56086e-05	1	1	TGGT1_203310-t26_1-p1	TGGT1_203310-t26_1-p1 [86-101]	0	2368.07	1.156	0.21	1	83.5	72.2	10.96	15.82	NA	NA	77.3	90.2	NA	NA	64.6	80.8		High	7.761e-05	4.032e-07	5.28
25921	TGGT1_304760	RNA recognition motif-containing protein	transcript=TGGT1_304760-t26_1 | gene=TGGT1_304760 | organism=Toxoplasma_gondii_GT1 | gene_product=RNA recognition motif-containing protein [Source:UniProtKB/TrEMBL;Acc:S7W2V6] | transcript_product=RNA recognition motif-containing protein | location=TGGT1_chrVIIa:667907-675253(+) | protein_length=1335 | sequence_SO=chromosome | SO=protein_coding_gene | is_pseudo=false	[R].ELHAASFPVEYDGEDDSPYLQPSER.[V]	1xTMTpro [N-Term]; 1xPhospho [S17(100)]	TGGT1_304760-t26_1-p1 1xPhospho [S60(100)]	3	High	5.86036e-13	9.56086e-05	1	1	TGGT1_304760-t26_1-p1	TGGT1_304760-t26_1-p1 [44-68]	0	3235.44	0.989	-0.02	1	79	79.9	26.82	16.47	108	95.8	63.4	65.2	84.5	103	72.1	75.6		High	0.0001044	5.637e-13	8.28
54659	TGGT1_295658	zinc finger in N-recognin protein	transcript=TGGT1_295658-t26_1 | gene=TGGT1_295658 | organism=Toxoplasma_gondii_GT1 | gene_product=E3 ubiquitin-protein ligase [Source:UniProtKB/TrEMBL;Acc:S7UJ58] | transcript_product=zinc finger in N-recognin protein | location=TGGT1_chrIa:1611672-1632204(-) | protein_length=4439 | sequence_SO=chromosome | SO=protein_coding_gene | is_pseudo=false	[R].LEETHGETAASTSADGPSSR.[T]	1xTMTpro [N-Term]; 1xPhospho [S/T]		6	High	6.58916e-06	9.56086e-05	1	1	TGGT1_295658-t26_1-p1	TGGT1_295658-t26_1-p1 [303-322]	0	2387.07	0.999	0	1	18	18	58.29	49.45	34.5	25	13	8.4	30.2	18	10.9	NA		High	0.0001044	4.03e-06	4.68
54660	TGGT1_295658	zinc finger in N-recognin protein	transcript=TGGT1_295658-t26_1 | gene=TGGT1_295658 | organism=Toxoplasma_gondii_GT1 | gene_product=E3 ubiquitin-protein ligase [Source:UniProtKB/TrEMBL;Acc:S7UJ58] | transcript_product=zinc finger in N-recognin protein | location=TGGT1_chrIa:1611672-1632204(-) | protein_length=4439 | sequence_SO=chromosome | SO=protein_coding_gene | is_pseudo=false	[R].LEETHGETAASTSADGPSSR.[T]	1xTMTpro [N-Term]; 2xPhospho [S/T]		5	High	1.58344e-05	9.56086e-05	1	1	TGGT1_295658-t26_1-p1	TGGT1_295658-t26_1-p1 [303-322]	0	2467.03	0.692	-0.53	1	14.5	21	29.04	10.47	NA	NA	17.9	11.8	NA	NA	22.6	19.5		High	7.761e-05	7.3e-06	3.73
55285	TGGT1_315750	hypothetical protein	transcript=TGGT1_315750-t26_1 | gene=TGGT1_315750 | organism=Toxoplasma_gondii_GT1 | gene_product=hypothetical protein | transcript_product=hypothetical protein | location=TGGT1_chrXI:4888664-4890249(-) | protein_length=231 | sequence_SO=chromosome | SO=protein_coding_gene | is_pseudo=false	[R].LFSPEGSFVMAPEVTPETPVRR.[A]	1xTMTpro [N-Term]; 2xPhospho [S3(100); T18(100)]	TGGT1_315750-t26_1-p1 2xPhospho [S42(100); T57(100)]	4	High	1.0003e-05	9.56086e-05	1	1	TGGT1_315750-t26_1-p1	TGGT1_315750-t26_1-p1 [40-61]	1	2910.38	1.002	0	1	41.8	41.7	36.4	36.25	25.3	34	51.3	58.9	31.3	29.2	55.5	59.8		High	7.761e-05	4.438e-06	5.37
77610	TGGT1_214090	signal peptidase	transcript=TGGT1_214090-t26_1 | gene=TGGT1_214090 | organism=Toxoplasma_gondii_GT1 | gene_product=Signal peptidase [Source:UniProtKB/TrEMBL;Acc:S7W5I3] | transcript_product=signal peptidase | location=TGGT1_chrX:5908335-5920860(+) | protein_length=1859 | sequence_SO=chromosome | SO=protein_coding_gene | is_pseudo=false	[R].RKEPEEEEGEEEETEESAEELQK.[A]	2xTMTpro [K2; K23]; 1xTMTpro [N-Term]; 1xPhospho [S17(100)]	TGGT1_214090-t26_1-p1 1xPhospho [S1572(100)]	2	High	7.1326e-06	9.56086e-05	1	1	TGGT1_214090-t26_1-p1	TGGT1_214090-t26_1-p1 [1556-1578]	2	3755.78	0.802	-0.32	1	7.3	9.1	11.1	8.75	NA	NA	6.7	7.9	NA	NA	8.6	9.7		High	7.761e-05	3.085e-06	3.95
96558	TGGT1_224160	hypothetical protein	transcript=TGGT1_224160-t26_1 | gene=TGGT1_224160 | organism=Toxoplasma_gondii_GT1 | gene_product=hypothetical protein | transcript_product=hypothetical protein | location=TGGT1_chrX:3191358-3203244(+) | protein_length=2064 | sequence_SO=chromosome | SO=protein_coding_gene | is_pseudo=false	[K].SSREASLGAVGEEAPNAR.[G]	1xTMTpro [N-Term]; 2xPhospho [S6(100); S]	TGGT1_224160-t26_1-p1 2xPhospho [S980(100); S]	2	High	3.60857e-05	9.56086e-05	1	1	TGGT1_224160-t26_1-p1	TGGT1_224160-t26_1-p1 [975-992]	1	2265.02	1.5	0.59	1	25.4	16.9	22.48	2.96	NA	NA	29.8	21.6	NA	NA	17.3	16.6		High	7.761e-05	1.783e-05	4.35
55287	TGGT1_315750	hypothetical protein	transcript=TGGT1_315750-t26_1 | gene=TGGT1_315750 | organism=Toxoplasma_gondii_GT1 | gene_product=hypothetical protein | transcript_product=hypothetical protein | location=TGGT1_chrXI:4888664-4890249(-) | protein_length=231 | sequence_SO=chromosome | SO=protein_coding_gene | is_pseudo=false	[R].LFSPEGSFVMAPEVTPETPVRR.[A]	1xOxidation [M10]; 1xTMTpro [N-Term]; 3xPhospho [S3(100); S7(100); T18(100)]	TGGT1_315750-t26_1-p1 3xPhospho [S42(100); S46(100); T57(100)]	1	High	6.54579e-06	9.56086e-05	1	1	TGGT1_315750-t26_1-p1	TGGT1_315750-t26_1-p1 [40-61]	1	3006.34	0.995	-0.01	1	26	26.1	3.56	5.92	NA	NA	26.6	25.3	NA	NA	27.2	25		High	7.761e-05	2.808e-06	4.97
55289	TGGT1_263210	ubiquitin interaction motif domain-containing protein	transcript=TGGT1_263210-t26_1 | gene=TGGT1_263210 | organism=Toxoplasma_gondii_GT1 | gene_product=Ubiquitin interaction motif domain-containing protein [Source:UniProtKB/TrEMBL;Acc:S7WDH5] | transcript_product=ubiquitin interaction motif domain-containing protein | location=TGGT1_chrVIIb:682807-685672(-) | protein_length=923 | sequence_SO=chromosome | SO=protein_coding_gene | is_pseudo=false	[R].LFSPRDPSETGEGDSASFR.[C]	1xTMTpro [N-Term]; 1xPhospho [S3(100)]	TGGT1_263210-t26_1-p1 1xPhospho [S397(100)]	3	High	1.93142e-05	9.56086e-05	1	1	TGGT1_263210-t26_1-p1	TGGT1_263210-t26_1-p1 [395-413]	1	2439.11	1.103	0.14	1	46.6	42.2	7.75	25.18	45.2	41.1	48	49	38.6	25.8	46.1	47.6		High	0.0001044	1.151e-05	2.88
55292	TGGT1_311650	leucine rich repeat-containing protein	transcript=TGGT1_311650-t26_1 | gene=TGGT1_311650 | organism=Toxoplasma_gondii_GT1 | gene_product=Leucine rich repeat-containing protein [Source:UniProtKB/TrEMBL;Acc:S7UTM9] | transcript_product=leucine rich repeat-containing protein | location=TGGT1_chrXI:2140198-2146082(+) | protein_length=1711 | sequence_SO=chromosome | SO=protein_coding_gene | is_pseudo=false	[R].LFSQAAPDSPEPEGR.[D]	1xTMTpro [N-Term]; 1xPhospho [S9(100)]	TGGT1_311650-t26_1-p1 1xPhospho [S625(100)]	1	High	2.98401e-07	9.56086e-05	1	1	TGGT1_311650-t26_1-p1	TGGT1_311650-t26_1-p1 [617-631]	0	1984.93	1.305	0.38	1	58.4	44.7	5.15	35.75	60.6	56.3	NA	NA	57.9	34.6	NA	NA		High	0.0001044	1.988e-07	4.84
77606	TGGT1_310900	AP2 domain transcription factor AP2XI-2	transcript=TGGT1_310900-t26_1 | gene=TGGT1_310900 | organism=Toxoplasma_gondii_GT1 | gene_product=AP2 domain transcription factor AP2XI-2 [Source:UniProtKB/TrEMBL;Acc:S7UT79] | transcript_product=AP2 domain transcription factor AP2XI-2 | location=TGGT1_chrXI:1609168-1617013(-) | protein_length=2243 | sequence_SO=chromosome | SO=protein_coding_gene | is_pseudo=false	[K].RKEDPEAGDDLSPVAR.[A]	1xTMTpro [K2]; 1xTMTpro [N-Term]; 1xPhospho [S12(100)]	TGGT1_310900-t26_1-p1 1xPhospho [S1300(100)]	8	High	9.83342e-05	9.56086e-05	1	1	TGGT1_310900-t26_1-p1	TGGT1_310900-t26_1-p1 [1289-1304]	2	2443.25	1.198	0.26	1	204.8	171	2.44	9.36	NA	NA	201.3	208.4	NA	NA	160	182.7		High	7.761e-05	5.365e-05	3.56
96698	TGGT1_312490	hypothetical protein	transcript=TGGT1_312490-t26_1 | gene=TGGT1_312490 | organism=Toxoplasma_gondii_GT1 | gene_product=hypothetical protein | transcript_product=hypothetical protein | location=TGGT1_chrXI:2688508-2693146(+) | protein_length=443 | sequence_SO=chromosome | SO=protein_coding_gene | is_pseudo=false	[R].SSRSSDYAATDDAR.[A]	1xTMTpro [N-Term]; 2xPhospho [S4(100); S5(100)]	TGGT1_312490-t26_1-p1 2xPhospho [S268(100); S269(100)]	16	High	0.000127021	9.56086e-05	1	1	TGGT1_312490-t26_1-p1	TGGT1_312490-t26_1-p1 [265-278]	1	1965.79	1.064	0.09	1	41.4	38.9	63.34	68.36	23.5	21.1	73	79.1	24.2	14.7	62.5	80.2		High	7.761e-05	7.149e-05	3.7
96713	TGGT1_289615	hypothetical protein	transcript=TGGT1_289615-t26_1 | gene=TGGT1_289615 | organism=Toxoplasma_gondii_GT1 | gene_product=hypothetical protein | transcript_product=hypothetical protein | location=TGGT1_chrIX:3154768-3157035(+) | protein_length=214 | sequence_SO=chromosome | SO=protein_coding_gene | is_pseudo=false	[R].SSRTLAPEEEDQLR.[S]	1xTMTpro [N-Term]; 1xPhospho [T4(99.3)]	TGGT1_289615-t26_1-p1 1xPhospho [T97(99.3)]	9	High	9.39272e-05	9.56086e-05	1	1	TGGT1_289615-t26_1-p1	TGGT1_289615-t26_1-p1 [94-107]	1	2014.98	0.913	-0.13	1	25.3	27.7	65.99	49.03	8.3	15.4	41.5	43.4	16.3	18.9	40.7	45.4		High	7.761e-05	5.093e-05	3.94
96714	TGGT1_289615	hypothetical protein	transcript=TGGT1_289615-t26_1 | gene=TGGT1_289615 | organism=Toxoplasma_gondii_GT1 | gene_product=hypothetical protein | transcript_product=hypothetical protein | location=TGGT1_chrIX:3154768-3157035(+) | protein_length=214 | sequence_SO=chromosome | SO=protein_coding_gene | is_pseudo=false	[R].SSRTLAPEEEDQLR.[S]	1xTMTpro [N-Term]; 2xPhospho [S1(99.5); T4(100)]	TGGT1_289615-t26_1-p1 2xPhospho [S94(99.5); T97(100)]	10	High	8.81881e-05	9.56086e-05	1	1	TGGT1_289615-t26_1-p1	TGGT1_289615-t26_1-p1 [94-107]	1	2094.94	1.511	0.6	1	23.8	15.8	14.03	26.89	NA	NA	26.3	21.6	NA	NA	13	19.1		High	7.761e-05	4.75e-05	3.37
96742	TGGT1_233160	hypothetical protein	transcript=TGGT1_233160-t26_1 | gene=TGGT1_233160 | organism=Toxoplasma_gondii_GT1 | gene_product=hypothetical protein | transcript_product=hypothetical protein | location=TGGT1_chrVIII:2462095-2469533(+) | protein_length=1856 | sequence_SO=chromosome | SO=protein_coding_gene | is_pseudo=false	[R].SSSAAGDVGDSSPSLTR.[R]	1xTMTpro [N-Term]; 1xPhospho [S/T]		4	High	3.79446e-05	9.56086e-05	1	1	TGGT1_233160-t26_1-p1	TGGT1_233160-t26_1-p1 [600-616]	0	1977.91	1.073	0.1	1	65	60.6	12.51	9.71	NA	NA	59.5	71.1	NA	NA	56.5	64.9		High	7.761e-05	1.884e-05	4.07
96757	TGGT1_309050	hypothetical protein	transcript=TGGT1_309050-t26_1 | gene=TGGT1_309050 | organism=Toxoplasma_gondii_GT1 | gene_product=hypothetical protein | transcript_product=hypothetical protein | location=TGGT1_chrXI:423266-426389(-) | protein_length=784 | sequence_SO=chromosome | SO=protein_coding_gene | is_pseudo=false	[R].SSSAEVAHDMSPLR.[S]	1xTMTpro [N-Term]; 1xPhospho [S]		7	High	2.7081e-06	9.56086e-05	1	1	TGGT1_309050-t26_1-p1	TGGT1_309050-t26_1-p1 [4-17]	0	1870.87	0.826	-0.28	1	71.4	86.5	39.26	35.62	124.2	78.4	65.1	52.2	113.1	131.5	66.2	65.4		High	7.761e-05	1.083e-06	4.94
96758	TGGT1_309050	hypothetical protein	transcript=TGGT1_309050-t26_1 | gene=TGGT1_309050 | organism=Toxoplasma_gondii_GT1 | gene_product=hypothetical protein | transcript_product=hypothetical protein | location=TGGT1_chrXI:423266-426389(-) | protein_length=784 | sequence_SO=chromosome | SO=protein_coding_gene | is_pseudo=false	[R].SSSAEVAHDMSPLR.[S]	1xOxidation [M10]; 1xTMTpro [N-Term]; 1xPhospho [S]		7	High	5.99641e-05	9.56086e-05	1	1	TGGT1_309050-t26_1-p1	TGGT1_309050-t26_1-p1 [4-17]	0	1886.86	0.793	-0.33	1	77	97	39.34	42.6	100.1	128.5	58.5	59.2	151.4	132.5	71.1	61.9		High	0.0001044	3.513e-05	3.21
25189	TGGT1_220900	hypothetical protein	transcript=TGGT1_220900-t26_1 | gene=TGGT1_220900 | organism=Toxoplasma_gondii_GT1 | gene_product=hypothetical protein | transcript_product=hypothetical protein | location=TGGT1_chrII:27409-29529(+) | protein_length=706 | sequence_SO=chromosome | SO=protein_coding_gene | is_pseudo=false	[R].EGSVCSNDGEDKK.[E]	1xMethylthio [C5]; 2xTMTpro [K12; K13]; 1xTMTpro [N-Term]; 1xPhospho [S6(100)]	TGGT1_220900-t26_1-p1 1xMethylthio [C440]; 1xPhospho [S441(100)]	5	High	0.000107371	9.56086e-05	1	1	TGGT1_220900-t26_1-p1	TGGT1_220900-t26_1-p1 [436-448]	1	2406.15	1.046	0.06	1	196.1	187.5	16.76	10.56	163.1	173.1	226.9	222.1	171.7	186.2	219.8	188.8		High	7.761e-05	5.918e-05	3.2
25123	TGGT1_236570	lysine decarboxylase family protein	transcript=TGGT1_236570-t26_1 | gene=TGGT1_236570 | organism=Toxoplasma_gondii_GT1 | gene_product=Lysine decarboxylase family protein [Source:UniProtKB/TrEMBL;Acc:S7W5X6] | transcript_product=lysine decarboxylase family protein | location=TGGT1_chrX:5322842-5325476(+) | protein_length=397 | sequence_SO=chromosome | SO=protein_coding_gene | is_pseudo=false	[K].EGSNSGNSPSSVPAEAISDK.[G]	1xTMTpro [K20]; 1xTMTpro [N-Term]; 2xPhospho [S8(100); S10(99.4)]	TGGT1_236570-t26_1-p1 2xPhospho [S35(100); S37(99.4)]	1	High	3.19997e-05	9.56086e-05	1	1	TGGT1_236570-t26_1-p1	TGGT1_236570-t26_1-p1 [28-47]	0	2701.23	1.28	0.36	1	55.4	43.3	9.54	20.2	59.3	51.8	NA	NA	37.5	50	NA	NA		High	0.0001044	1.886e-05	3.84
25117	TGGT1_265250	RNA recognition motif-containing protein	transcript=TGGT1_265250-t26_1 | gene=TGGT1_265250 | organism=Toxoplasma_gondii_GT1 | gene_product=RRM domain-containing protein [Source:UniProtKB/TrEMBL;Acc:S7UGW5] | transcript_product=RNA recognition motif-containing protein | location=TGGT1_chrIX:1478253-1487922(+) | protein_length=1564 | sequence_SO=chromosome | SO=protein_coding_gene | is_pseudo=false	[R].EGSNEETPGTSGAASDSQGEEEGREGDR.[G]	1xTMTpro [N-Term]; 2xPhospho [S15(100); S17(100)]	TGGT1_265250-t26_1-p1 2xPhospho [S1270(100); S1272(100)]	9	High	1.57532e-07	9.56086e-05	1	1	TGGT1_265250-t26_1-p1	TGGT1_265250-t26_1-p1 [1256-1283]	1	3302.29	1.165	0.22	1	9.7	8.4	16.46	43.33	NA	NA	10.9	8.7	NA	NA	11.5	6.1		High	7.761e-05	5.048e-08	6.6
25116	TGGT1_265250	RNA recognition motif-containing protein	transcript=TGGT1_265250-t26_1 | gene=TGGT1_265250 | organism=Toxoplasma_gondii_GT1 | gene_product=RRM domain-containing protein [Source:UniProtKB/TrEMBL;Acc:S7UGW5] | transcript_product=RNA recognition motif-containing protein | location=TGGT1_chrIX:1478253-1487922(+) | protein_length=1564 | sequence_SO=chromosome | SO=protein_coding_gene | is_pseudo=false	[R].EGSNEETPGTSGAASDSQGEEEGREGDR.[G]	1xTMTpro [N-Term]; 1xPhospho [S17(100)]	TGGT1_265250-t26_1-p1 1xPhospho [S1272(100)]	11	High	4.4544e-06	9.56086e-05	1	1	TGGT1_265250-t26_1-p1	TGGT1_265250-t26_1-p1 [1256-1283]	1	3222.33	1.228	0.3	1	10.4	8.5	13.28	4.79	NA	NA	9.5	11.4	NA	NA	8.8	8.2		High	0.0001044	2.755e-06	4.44
25114	TGGT1_265250	RNA recognition motif-containing protein	transcript=TGGT1_265250-t26_1 | gene=TGGT1_265250 | organism=Toxoplasma_gondii_GT1 | gene_product=RRM domain-containing protein [Source:UniProtKB/TrEMBL;Acc:S7UGW5] | transcript_product=RNA recognition motif-containing protein | location=TGGT1_chrIX:1478253-1487922(+) | protein_length=1564 | sequence_SO=chromosome | SO=protein_coding_gene | is_pseudo=false	[R].EGSNEETPGTSGAASDSQGEEEGR.[E]	1xTMTpro [N-Term]; 1xPhospho [S17(99.6)]	TGGT1_265250-t26_1-p1 1xPhospho [S1272(99.6)]	11	High	1.45577e-08	9.56086e-05	1	1	TGGT1_265250-t26_1-p1	TGGT1_265250-t26_1-p1 [1256-1279]	0	2765.13	1.564	0.65	1	11.2	7.1	6.94	14.62	NA	NA	11.7	10.6	NA	NA	7.9	6.4		High	7.761e-05	3.869e-09	6.69
55302	TGGT1_262390	TLD protein	transcript=TGGT1_262390-t26_1 | gene=TGGT1_262390 | organism=Toxoplasma_gondii_GT1 | gene_product=TLDc domain-containing protein [Source:UniProtKB/TrEMBL;Acc:S7UYB4] | transcript_product=TLD protein | location=TGGT1_chrVIIb:1280695-1289391(+) | protein_length=1392 | sequence_SO=chromosome | SO=protein_coding_gene | is_pseudo=false	[R].LFSSRPGEPVSAAPSSPGDGSLHAR.[S]	1xTMTpro [N-Term]; 1xPhospho [S]		1	High	1.05274e-05	9.56086e-05	1	1	TGGT1_262390-t26_1-p1	TGGT1_262390-t26_1-p1 [137-161]	0	2863.41	1.084	0.12	1	43.7	40.3	12.13	23.61	NA	NA	47.6	40.1	NA	NA	47.7	34		High	7.761e-05	4.693e-06	4.7
25107	TGGT1_246600	ABC1 family protein	transcript=TGGT1_246600-t26_1 | gene=TGGT1_246600 | organism=Toxoplasma_gondii_GT1 | gene_product=ABC1 family protein [Source:UniProtKB/TrEMBL;Acc:S7V0T4] | transcript_product=ABC1 family protein | location=TGGT1_chrXII:2806257-2812250(+) | protein_length=1900 | sequence_SO=chromosome | SO=protein_coding_gene | is_pseudo=false	[R].EGSLSGEHDVQAPLTDSR.[K]	1xTMTpro [N-Term]; 1xPhospho [S3(100)]	TGGT1_246600-t26_1-p1 1xPhospho [S1051(100)]	15	High	4.134e-05	9.56086e-05	1	1	TGGT1_246600-t26_1-p1	TGGT1_246600-t26_1-p1 [1049-1066]	0	2282.06	0.85	-0.23	1	31.7	37.3	34.79	17.5	21.2	25.1	40.1	44.8	37.4	29.7	45.8	37.2		High	7.761e-05	2.067e-05	3.93
77600	TGGT1_204380	hypothetical protein	transcript=TGGT1_204380-t26_1 | gene=TGGT1_204380 | organism=Toxoplasma_gondii_GT1 | gene_product=hypothetical protein | transcript_product=hypothetical protein | location=TGGT1_chrVIIa:1732949-1745124(-) | protein_length=3226 | sequence_SO=chromosome | SO=protein_coding_gene | is_pseudo=false	[R].RKDEGEEGENASWTDEER.[E]	1xTMTpro [K2]; 1xTMTpro [N-Term]; 1xPhospho [T14(100)]	TGGT1_204380-t26_1-p1 1xPhospho [T1254(100)]	2	High	3.97675e-05	9.56086e-05	1	1	TGGT1_204380-t26_1-p1	TGGT1_204380-t26_1-p1 [1241-1258]	2	2825.29	1.134	0.18	1	22.4	19.7	0.69	46.62	NA	NA	22.3	22.5	NA	NA	27.8	14		High	7.761e-05	1.982e-05	3.37
77599	TGGT1_202550	NLI interacting factor family phosphatase	transcript=TGGT1_202550-t26_1 | gene=TGGT1_202550 | organism=Toxoplasma_gondii_GT1 | gene_product=FCP1 homology domain-containing protein [Source:UniProtKB/TrEMBL;Acc:S7UV08] | transcript_product=NLI interacting factor family phosphatase | location=TGGT1_chrVIIa:3125453-3133382(+) | protein_length=2212 | sequence_SO=chromosome | SO=protein_coding_gene | is_pseudo=false	[K].RKATTEDLVPGDSGEAER.[A]	1xTMTpro [K2]; 1xTMTpro [N-Term]; 1xPhospho [T4(99.6)]	TGGT1_202550-t26_1-p1 1xPhospho [T290(99.6)]	1	High	5.70779e-05	9.56086e-05	1	1	TGGT1_202550-t26_1-p1	TGGT1_202550-t26_1-p1 [287-304]	2	2619.33	0.702	-0.51	1	17.6	25.1	15.28	1.11	NA	NA	19.6	15.8	NA	NA	25.3	24.9		High	7.761e-05	2.94e-05	3.76
96797	TGGT1_270930	hypothetical protein	transcript=TGGT1_270930-t26_1 | gene=TGGT1_270930 | organism=Toxoplasma_gondii_GT1 | gene_product=hypothetical protein | transcript_product=hypothetical protein | location=TGGT1_chrVIII:4849808-4869937(-) | protein_length=3000 | sequence_SO=chromosome | SO=protein_coding_gene | is_pseudo=false	[R].SSSASGANQGGRPGGPGEGPVGAGGPPNSK.[W]	1xTMTpro [K30]; 1xTMTpro [N-Term]; 1xPhospho [S]		4	High	3.76951e-06	9.56086e-05	1	1	TGGT1_270930-t26_1-p1	TGGT1_270930-t26_1-p1 [2852-2881]	0	3279.6	0.86	-0.22	1	30.4	35.3	17.04	14.45	NA	NA	26.9	34.3	NA	NA	31.9	39.1		High	7.761e-05	1.548e-06	4.17
96802	TGGT1_301410	hypothetical protein	transcript=TGGT1_301410-t26_1 | gene=TGGT1_301410 | organism=Toxoplasma_gondii_GT1 | gene_product=hypothetical protein | transcript_product=hypothetical protein | location=TGGT1_chrIV:2344797-2350279(+) | protein_length=1033 | sequence_SO=chromosome | SO=protein_coding_gene | is_pseudo=false	[R].SSSASLLPETEAER.[G]	1xTMTpro [N-Term]; 1xPhospho [S/T]		5	High	2.90216e-05	9.56086e-05	1	1	TGGT1_301410-t26_1-p1	TGGT1_301410-t26_1-p1 [701-714]	0	1860.89	1.231	0.3	1	29	23.5	10.8	35.07	29.1	29.7	23.3	28.9	10.2	22	26.1	25.2		High	7.761e-05	1.406e-05	4.04
96824	TGGT1_253570	hypothetical protein	transcript=TGGT1_253570-t26_1 | gene=TGGT1_253570 | organism=Toxoplasma_gondii_GT1 | gene_product=hypothetical protein | transcript_product=hypothetical protein | location=TGGT1_chrIII:1017173-1020294(+) | protein_length=318 | sequence_SO=chromosome | SO=protein_coding_gene | is_pseudo=false	[R].SSSATAGSAGR.[Q]	1xTMTpro [N-Term]; 1xPhospho [S3(100)]	TGGT1_253570-t26_1-p1 1xPhospho [S294(100)]	6	High	0.000113163	9.56086e-05	1	1	TGGT1_253570-t26_1-p1	TGGT1_253570-t26_1-p1 [292-302]	0	1335.62	1.088	0.12	1	252.1	231.6	21.32	19.34	194.2	217.9	302.6	291.5	207.6	176.1	270.5	258.4		High	0.0001044	6.681e-05	3.86
25122	TGGT1_236570	lysine decarboxylase family protein	transcript=TGGT1_236570-t26_1 | gene=TGGT1_236570 | organism=Toxoplasma_gondii_GT1 | gene_product=Lysine decarboxylase family protein [Source:UniProtKB/TrEMBL;Acc:S7W5X6] | transcript_product=lysine decarboxylase family protein | location=TGGT1_chrX:5322842-5325476(+) | protein_length=397 | sequence_SO=chromosome | SO=protein_coding_gene | is_pseudo=false	[K].EGSNSGNSPSSVPAEAISDK.[G]	1xTMTpro [K20]; 1xTMTpro [N-Term]; 1xPhospho [S8(100)]	TGGT1_236570-t26_1-p1 1xPhospho [S35(100)]	9	High	3.01541e-06	9.56086e-05	1	1	TGGT1_236570-t26_1-p1	TGGT1_236570-t26_1-p1 [28-47]	0	2621.26	1.178	0.24	1	182.3	154.8	7.27	16.14	201.6	169.6	179.8	185	124	140.7	170.4	176		High	7.761e-05	1.218e-06	4.84
25191	TGGT1_264430	hypothetical protein	transcript=TGGT1_264430-t26_1 | gene=TGGT1_264430 | organism=Toxoplasma_gondii_GT1 | gene_product=hypothetical protein | transcript_product=hypothetical protein | location=TGGT1_chrIX:2067836-2071288(+) | protein_length=1151 | sequence_SO=chromosome | SO=protein_coding_gene | is_pseudo=false	[K].EGSVDASLQTPLKPTDGK.[T]	2xTMTpro [K13; K18]; 1xTMTpro [N-Term]; 1xPhospho [S3(100)]	TGGT1_264430-t26_1-p1 1xPhospho [S755(100)]	1	High	4.30957e-06	9.56086e-05	1	1	TGGT1_264430-t26_1-p1	TGGT1_264430-t26_1-p1 [753-770]	0	2835.53	0.373	-1.42	0.0672382	21	56.4	7.67	0.93	NA	NA	19.9	22.2	NA	NA	56.1	56.8		High	7.761e-05	1.791e-06	3.83
96450	TGGT1_231210	sarcalumenin/eps15 family protein	transcript=TGGT1_231210-t26_1 | gene=TGGT1_231210 | organism=Toxoplasma_gondii_GT1 | gene_product=Sarcalumenin/eps15 family protein [Source:UniProtKB/TrEMBL;Acc:S7V2M1] | transcript_product=sarcalumenin/eps15 family protein | location=TGGT1_chrVIII:1323693-1330562(-) | protein_length=594 | sequence_SO=chromosome | SO=protein_coding_gene | is_pseudo=false	[K].SSQEVNVYHNVK.[A]	1xTMTpro [K12]; 1xTMTpro [N-Term]; 1xPhospho [S1(99.8)]	TGGT1_231210-t26_1-p1 1xPhospho [S14(99.8)]	10	High	1.99265e-07	9.56086e-05	1	1	TGGT1_231210-t26_1-p1	TGGT1_231210-t26_1-p1 [14-25]	0	2092.07	0.667	-0.58	1	131.6	197.3	39.22	37.66	82	98	176.7	185.8	144.4	144.7	269.1	295.9		High	7.761e-05	6.503e-08	5.07
55167	TGGT1_226680	hypothetical protein	transcript=TGGT1_226680-t26_1 | gene=TGGT1_226680 | organism=Toxoplasma_gondii_GT1 | gene_product=hypothetical protein | transcript_product=hypothetical protein | location=TGGT1_chrX:1350715-1356291(-) | protein_length=899 | sequence_SO=chromosome | SO=protein_coding_gene | is_pseudo=false	[R].LFHSVTAEETNLPGAGAEK.[V]	1xTMTpro [K19]; 1xTMTpro [N-Term]; 1xPhospho [S/T]		3	High	1.9518e-06	9.56086e-05	1	1	TGGT1_226680-t26_1-p1	TGGT1_226680-t26_1-p1 [741-759]	0	2659.36	0.853	-0.23	1	118.7	139.2	38.42	32.82	159.1	168.2	88.6	76.3	174.7	188.4	93.8	110.9		High	0.0001044	1.233e-06	4.2
55216	TGGT1_288190	hypothetical protein	transcript=TGGT1_288190-t26_1 | gene=TGGT1_288190 | organism=Toxoplasma_gondii_GT1 | gene_product=hypothetical protein | transcript_product=hypothetical protein | location=TGGT1_chrIX:2174491-2190662(-) | protein_length=5049 | sequence_SO=chromosome | SO=protein_coding_gene | is_pseudo=false	[K].IFQDEENHSEREEDITPAR.[E]	1xTMTpro [N-Term]; 1xPhospho [S9(100)]	TGGT1_288190-t26_1-p1 1xPhospho [S3804(100)]	8	High	1.72182e-05	9.56086e-05	1	1	TGGT1_288190-t26_1-p1	TGGT1_288190-t26_1-p1 [3796-3814]	1	2699.23	1.083	0.12	1	22.5	20.8	9.78	22.51	NA	NA	24.1	21	NA	NA	24.4	17.7		High	7.761e-05	7.984e-06	4.41
96401	TGGT1_270690	arginyl-tRNA synthetase	transcript=TGGT1_270690-t26_1 | gene=TGGT1_270690 | organism=Toxoplasma_gondii_GT1 | gene_product=Arginyl-tRNA synthetase [Source:UniProtKB/TrEMBL;Acc:A0A125YS10] | transcript_product=arginyl-tRNA synthetase | location=TGGT1_chrVIII:5067864-5080628(-) | protein_length=1174 | sequence_SO=chromosome | SO=protein_coding_gene | is_pseudo=false	[K].SSPTHAGASGGGAFDGLQGGEGR.[Q]	1xTMTpro [N-Term]; 1xPhospho [S/T]		6	High	1.00035e-09	9.56086e-05	1	1	TGGT1_270690-t26_1-p1	TGGT1_270690-t26_1-p1 [675-697]	0	2457.11	1.032	0.05	1	83.5	80.9	11.16	4.42	75.6	78.6	96.2	88.7	85.6	77.7	82.8	79		High	7.761e-05	4.313e-10	7.57
96411	TGGT1_280370	hypothetical protein	transcript=TGGT1_280370-t26_1 | gene=TGGT1_280370 | organism=Toxoplasma_gondii_GT1 | gene_product=hypothetical protein | transcript_product=hypothetical protein | location=TGGT1_chrVIIa:472199-474884(+) | protein_length=761 | sequence_SO=chromosome | SO=protein_coding_gene | is_pseudo=false	[R].SSPVASTAPTPSPLVQSQK.[Q]	1xTMTpro [K19]; 1xTMTpro [N-Term]; 1xPhospho [S/T]		3	High	7.50086e-07	9.56086e-05	1	1	TGGT1_280370-t26_1-p1	TGGT1_280370-t26_1-p1 [162-180]	0	2570.37	1.035	0.05	1	70.1	67.7	2.82	26.17	NA	NA	71.5	68.7	NA	NA	56.2	81.7		High	7.761e-05	2.714e-07	5.07
77631	TGGT1_253440	putative cell-cycle-associated protein kinase SRPK	transcript=TGGT1_253440-t26_1 | gene=TGGT1_253440 | organism=Toxoplasma_gondii_GT1 | gene_product=Protein kinase domain-containing protein [Source:UniProtKB/TrEMBL;Acc:S7UMJ9] | transcript_product=putative cell-cycle-associated protein kinase SRPK | location=TGGT1_chrIII:942676-953857(+) | protein_length=1763 | sequence_SO=chromosome | SO=protein_coding_gene | is_pseudo=false	[R].RKPDEEQFGSPCSR.[T]	1xMethylthio [C12]; 1xTMTpro [K2]; 1xTMTpro [N-Term]; 1xPhospho [S13(100)]	TGGT1_253440-t26_1-p1 1xMethylthio [C1442]; 1xPhospho [S1443(100)]	8	High	0.000131938	9.56086e-05	1	1	TGGT1_253440-t26_1-p1	TGGT1_253440-t26_1-p1 [1431-1444]	1	2370.12	1.111	0.15	1	623.3	561.2	8.85	2.49	NA	NA	663.7	585.5	NA	NA	551.4	571.2		High	7.761e-05	7.458e-05	3.72
77621	TGGT1_257560	WD domain, G-beta repeat-containing protein	transcript=TGGT1_257560-t26_1 | gene=TGGT1_257560 | organism=Toxoplasma_gondii_GT1 | gene_product=WD_REPEATS_REGION domain-containing protein [Source:UniProtKB/TrEMBL;Acc:S7UZF8] | transcript_product=WD domain, G-beta repeat-containing protein | location=TGGT1_chrVIIb:3904702-3908262(+) | protein_length=1017 | sequence_SO=chromosome | SO=protein_coding_gene | is_pseudo=false	[R].RKGSASEEEQDEADEDDEGEDDVVDPEEAEAAALR.[T]	1xTMTpro [K2]; 1xTMTpro [N-Term]; 2xPhospho [S4(100); S6(100)]	TGGT1_257560-t26_1-p1 2xPhospho [S264(100); S266(100)]	6	High	1.01318e-08	9.56086e-05	1	1	TGGT1_257560-t26_1-p1	TGGT1_257560-t26_1-p1 [261-295]	2	4573.94	1.334	0.42	1	39.9	29.9	1.73	6.39	NA	NA	39.4	40.4	NA	NA	31.3	28.6		High	7.761e-05	2.617e-09	7.95
25304	TGGT1_277080	microneme protein MIC5	transcript=TGGT1_277080-t26_1 | gene=TGGT1_277080 | organism=Toxoplasma_gondii_GT1 | gene_product=Microneme protein MIC5 [Source:UniProtKB/TrEMBL;Acc:S7W847] | transcript_product=microneme protein MIC5 | location=TGGT1_chrXII:6631512-6633486(-) | protein_length=181 | sequence_SO=chromosome | SO=protein_coding_gene | is_pseudo=false	[K].EGVEETKHEDDPEMTR.[L]	1xOxidation [M14]; 1xTMTpro [K7]; 1xTMTpro [N-Term]; 1xPhospho [T6(100)]	TGGT1_277080-t26_1-p1 1xPhospho [T94(100)]	8	High	4.04809e-05	9.56086e-05	1	1	TGGT1_277080-t26_1-p1	TGGT1_277080-t26_1-p1 [89-104]	1	2606.19	1.129	0.18	1	163.2	144.6	11.64	17.17	NA	NA	150.3	177.3	NA	NA	163.3	128		High	7.761e-05	2.02e-05	4.21
25303	TGGT1_277080	microneme protein MIC5	transcript=TGGT1_277080-t26_1 | gene=TGGT1_277080 | organism=Toxoplasma_gondii_GT1 | gene_product=Microneme protein MIC5 [Source:UniProtKB/TrEMBL;Acc:S7W847] | transcript_product=microneme protein MIC5 | location=TGGT1_chrXII:6631512-6633486(-) | protein_length=181 | sequence_SO=chromosome | SO=protein_coding_gene | is_pseudo=false	[K].EGVEETKHEDDPEMTR.[L]	1xTMTpro [K7]; 1xTMTpro [N-Term]; 1xPhospho [T6(100)]	TGGT1_277080-t26_1-p1 1xPhospho [T94(100)]	6	High	8.57694e-05	9.56086e-05	1	1	TGGT1_277080-t26_1-p1	TGGT1_277080-t26_1-p1 [89-104]	1	2590.2	1.226	0.29	1	187.1	152.6	6.53	12.71	NA	NA	178.7	196	NA	NA	139.5	167		High	7.761e-05	4.61e-05	3.62
55236	TGGT1_268560	XPG N-terminal domain-containing protein	transcript=TGGT1_268560-t26_1 | gene=TGGT1_268560 | organism=Toxoplasma_gondii_GT1 | gene_product=XPG N-terminal domain-containing protein [Source:UniProtKB/TrEMBL;Acc:S7V4I3] | transcript_product=XPG N-terminal domain-containing protein | location=TGGT1_chrVIII:6432863-6442904(+) | protein_length=2004 | sequence_SO=chromosome | SO=protein_coding_gene | is_pseudo=false	[R].LFSADEEDSEAEEER.[G]	1xTMTpro [N-Term]; 1xPhospho [S9(100)]	TGGT1_268560-t26_1-p1 1xPhospho [S220(100)]	5	High	8.72403e-05	9.56086e-05	1	1	TGGT1_268560-t26_1-p1	TGGT1_268560-t26_1-p1 [212-226]	0	2139.89	0.902	-0.15	1	37.3	41.4	7.65	1.63	39.4	35.4	NA	NA	41.9	40.9	NA	NA		High	7.761e-05	4.691e-05	3.17
55237	TGGT1_268560	XPG N-terminal domain-containing protein	transcript=TGGT1_268560-t26_1 | gene=TGGT1_268560 | organism=Toxoplasma_gondii_GT1 | gene_product=XPG N-terminal domain-containing protein [Source:UniProtKB/TrEMBL;Acc:S7V4I3] | transcript_product=XPG N-terminal domain-containing protein | location=TGGT1_chrVIII:6432863-6442904(+) | protein_length=2004 | sequence_SO=chromosome | SO=protein_coding_gene | is_pseudo=false	[R].LFSADEEDSEAEEER.[G]	1xTMTpro [N-Term]; 2xPhospho [S3(100); S9(100)]	TGGT1_268560-t26_1-p1 2xPhospho [S214(100); S220(100)]	4	High	3.44831e-05	9.56086e-05	1	1	TGGT1_268560-t26_1-p1	TGGT1_268560-t26_1-p1 [212-226]	0	2219.86	1.572	0.65	1	44.5	28.3	5.82	2.54	46.4	42.7	NA	NA	28.8	27.8	NA	NA		High	0.0001044	2.029e-05	4.45
25291	TGGT1_249030	endonuclease/exonuclease/phosphatase family protein	transcript=TGGT1_249030-t26_1 | gene=TGGT1_249030 | organism=Toxoplasma_gondii_GT1 | gene_product=Endo/exonuclease/phosphatase domain-containing protein [Source:UniProtKB/TrEMBL;Acc:S7W971] | transcript_product=endonuclease/exonuclease/phosphatase family protein | location=TGGT1_chrXII:4253966-4255780(-) | protein_length=541 | sequence_SO=chromosome | SO=protein_coding_gene | is_pseudo=false	[R].EGVAEAANTADSSKPNVSASESASR.[R]	1xTMTpro [K14]; 1xTMTpro [N-Term]; 1xPhospho [S/T]		4	High	1.22411e-06	9.56086e-05	1	1	TGGT1_249030-t26_1-p1	TGGT1_249030-t26_1-p1 [222-246]	0	3123.51	0.673	-0.57	1	32.9	48.9	15.15	4.79	NA	NA	36.7	29.6	NA	NA	50.6	47.3		High	0.0001044	7.838e-07	3.72
77617	TGGT1_312260	hypothetical protein	transcript=TGGT1_312260-t26_1 | gene=TGGT1_312260 | organism=Toxoplasma_gondii_GT1 | gene_product=hypothetical protein | transcript_product=hypothetical protein | location=TGGT1_chrXI:2512317-2516826(-) | protein_length=904 | sequence_SO=chromosome | SO=protein_coding_gene | is_pseudo=false	[R].RKGDTLDNEAEGGSSPK.[R]	2xTMTpro [K2; K17]; 1xTMTpro [N-Term]; 1xPhospho [S15(100)]	TGGT1_312260-t26_1-p1 1xPhospho [S874(100)]	2	High	4.20403e-06	9.56086e-05	1	1	TGGT1_312260-t26_1-p1	TGGT1_312260-t26_1-p1 [860-876]	2	2753.43	1.246	0.32	1	34.1	27.4	2.99	3.1	NA	NA	34.8	33.4	NA	NA	28	26.8		High	7.761e-05	1.743e-06	3.9
55284	TGGT1_315750	hypothetical protein	transcript=TGGT1_315750-t26_1 | gene=TGGT1_315750 | organism=Toxoplasma_gondii_GT1 | gene_product=hypothetical protein | transcript_product=hypothetical protein | location=TGGT1_chrXI:4888664-4890249(-) | protein_length=231 | sequence_SO=chromosome | SO=protein_coding_gene | is_pseudo=false	[R].LFSPEGSFVMAPEVTPETPVRR.[A]	1xOxidation [M10]; 1xTMTpro [N-Term]; 1xPhospho [T18(100)]	TGGT1_315750-t26_1-p1 1xPhospho [T57(100)]	1	High	1.12508e-09	9.56086e-05	1	1	TGGT1_315750-t26_1-p1	TGGT1_315750-t26_1-p1 [40-61]	1	2846.41	1.505	0.59	0.329967	215.6	143.3	2.63	3.03	211.7	219.7	NA	NA	146.4	140.2	NA	NA		High	0.0001044	8.765e-10	7.19
55279	TGGT1_315750	hypothetical protein	transcript=TGGT1_315750-t26_1 | gene=TGGT1_315750 | organism=Toxoplasma_gondii_GT1 | gene_product=hypothetical protein | transcript_product=hypothetical protein | location=TGGT1_chrXI:4888664-4890249(-) | protein_length=231 | sequence_SO=chromosome | SO=protein_coding_gene | is_pseudo=false	[R].LFSPEGSFVMAPEVTPETPVR.[R]	1xTMTpro [N-Term]; 1xPhospho [S3(100)]	TGGT1_315750-t26_1-p1 1xPhospho [S42(100)]	2	High	6.78456e-05	9.56086e-05	1	1	TGGT1_315750-t26_1-p1	TGGT1_315750-t26_1-p1 [40-60]	0	2674.32	0.908	-0.14	1	24.5	27	57.32	51.96	48.7	37.4	16.1	14.4	47.9	37.6	14.7	19.4		High	0.0001044	3.971e-05	3.96
25241	TGGT1_239410	hypothetical protein	transcript=TGGT1_239410-t26_1 | gene=TGGT1_239410 | organism=Toxoplasma_gondii_GT1 | gene_product=hypothetical protein | transcript_product=hypothetical protein | location=TGGT1_chrVI:620562-631430(-) | protein_length=2505 | sequence_SO=chromosome | SO=protein_coding_gene | is_pseudo=false	[R].EGTGFVAQLGGEGSEASPR.[L]	1xTMTpro [N-Term]; 1xPhospho [S17(100)]	TGGT1_239410-t26_1-p1 1xPhospho [S2074(100)]	3	High	9.58842e-08	9.56086e-05	1	1	TGGT1_239410-t26_1-p1	TGGT1_239410-t26_1-p1 [2058-2076]	0	2233.05	0.965	-0.05	1	77.7	80.5	14.74	30.12	83.4	85.6	72.3	61.4	104.8	103.2	62.8	59.3		High	7.761e-05	2.956e-08	6.17
55280	TGGT1_315750	hypothetical protein	transcript=TGGT1_315750-t26_1 | gene=TGGT1_315750 | organism=Toxoplasma_gondii_GT1 | gene_product=hypothetical protein | transcript_product=hypothetical protein | location=TGGT1_chrXI:4888664-4890249(-) | protein_length=231 | sequence_SO=chromosome | SO=protein_coding_gene | is_pseudo=false	[R].LFSPEGSFVMAPEVTPETPVR.[R]	1xOxidation [M10]; 1xTMTpro [N-Term]; 1xPhospho [S3(100)]	TGGT1_315750-t26_1-p1 1xPhospho [S42(100)]	4	High	5.9399e-07	9.56086e-05	1	1	TGGT1_315750-t26_1-p1	TGGT1_315750-t26_1-p1 [40-60]	0	2690.31	1.173	0.23	1	85.1	72.5	5.39	10.15	84.1	88.2	77.7	86	63.2	67.8	77.8	77.5		High	7.761e-05	2.109e-07	5.92
25235	TGGT1_280660	HECT-domain (ubiquitin-transferase) domain-containing protein	transcript=TGGT1_280660-t26_1 | gene=TGGT1_280660 | organism=Toxoplasma_gondii_GT1 | gene_product=HECT domain-containing protein [Source:UniProtKB/TrEMBL;Acc:S7UUN0] | transcript_product=HECT-domain (ubiquitin-transferase) domain-containing protein | location=TGGT1_chrVIIa:173679-235804(-) | protein_length=17226 | sequence_SO=chromosome | SO=protein_coding_gene | is_pseudo=false	[K].EGTFEGNDCERNSETER.[E]	1xMethylthio [C9]; 1xTMTpro [N-Term]; 1xPhospho [S13(100)]	TGGT1_280660-t26_1-p1 1xMethylthio [C10377]; 1xPhospho [S10381(100)]	8	High	1.63634e-05	9.56086e-05	1	1	TGGT1_280660-t26_1-p1	TGGT1_280660-t26_1-p1 [10369-10385]	1	2402.95	1.074	0.1	1	136.3	127	22.37	23.83	120.6	101	167.3	154.1	113.8	93.5	162.8	141.7		High	7.761e-05	7.557e-06	3.93
55281	TGGT1_315750	hypothetical protein	transcript=TGGT1_315750-t26_1 | gene=TGGT1_315750 | organism=Toxoplasma_gondii_GT1 | gene_product=hypothetical protein | transcript_product=hypothetical protein | location=TGGT1_chrXI:4888664-4890249(-) | protein_length=231 | sequence_SO=chromosome | SO=protein_coding_gene | is_pseudo=false	[R].LFSPEGSFVMAPEVTPETPVR.[R]	1xTMTpro [N-Term]; 2xPhospho [S3(100); S7(100)]	TGGT1_315750-t26_1-p1 2xPhospho [S42(100); S46(100)]	3	High	4.19016e-06	9.56086e-05	1	1	TGGT1_315750-t26_1-p1	TGGT1_315750-t26_1-p1 [40-60]	0	2754.28	1.124	0.17	1	13.6	12.1	54.47	58.73	22.9	21.7	8.6	7.5	14.6	28.1	8.3	10.1		High	7.761e-05	1.736e-06	5.18
25221	TGGT1_205390	hypothetical protein	transcript=TGGT1_205390-t26_1 | gene=TGGT1_205390 | organism=Toxoplasma_gondii_GT1 | gene_product=hypothetical protein | transcript_product=hypothetical protein | location=TGGT1_chrVIIa:1337780-1338691(-) | protein_length=303 | sequence_SO=chromosome | SO=protein_coding_gene | is_pseudo=false	[R].EGTASEPEFQQDEQQEPERR.[G]	1xTMTpro [N-Term]; 1xPhospho [S5(99.6)]	TGGT1_205390-t26_1-p1 1xPhospho [S63(99.6)]	3	High	0.000135235	9.56086e-05	1	1	TGGT1_205390-t26_1-p1	TGGT1_205390-t26_1-p1 [59-78]	1	2774.22	1.03	0.04	1	16.9	16.4	10.89	14.88	NA	NA	15.6	18.3	NA	NA	14.8	18.2		High	7.761e-05	7.673e-05	2.65
96428	TGGT1_259870	hypothetical protein	transcript=TGGT1_259870-t26_1 | gene=TGGT1_259870 | organism=Toxoplasma_gondii_GT1 | gene_product=SAC domain-containing protein [Source:UniProtKB/TrEMBL;Acc:S7W756] | transcript_product=hypothetical protein | location=TGGT1_chrVIIb:2616425-2623588(+) | protein_length=2122 | sequence_SO=chromosome | SO=protein_coding_gene | is_pseudo=false	[R].SSPYSPVSASSPR.[A]	1xTMTpro [N-Term]; 1xPhospho [S11(99.7)]	TGGT1_259870-t26_1-p1 1xPhospho [S1911(99.7)]	6	High	9.83342e-05	9.56086e-05	1	1	TGGT1_259870-t26_1-p1	TGGT1_259870-t26_1-p1 [1901-1913]	0	1705.81	0.911	-0.13	1	43.5	47.8	70.49	62.75	20.8	22.6	93.7	83.9	28.8	19.9	79.4	83.5		High	7.761e-05	5.361e-05	3.96
96431	TGGT1_220320	BSD domain-containing protein	transcript=TGGT1_220320-t26_1 | gene=TGGT1_220320 | organism=Toxoplasma_gondii_GT1 | gene_product=BSD domain-containing protein [Source:UniProtKB/TrEMBL;Acc:S7VPC6] | transcript_product=BSD domain-containing protein | location=TGGT1_chrV:190287-194052(+) | protein_length=319 | sequence_SO=chromosome | SO=protein_coding_gene | is_pseudo=false	[R].SSQAETDSGLAHAGDLR.[S]	1xTMTpro [N-Term]; 1xPhospho [S2(99.8)]	TGGT1_220320-t26_1-p1 1xPhospho [S210(99.8)]	4	High	4.25657e-09	9.56086e-05	1	1	TGGT1_220320-t26_1-p1	TGGT1_220320-t26_1-p1 [209-225]	0	2098.97	0.959	-0.06	1	94.3	98.3	15.63	16.64	92.8	116.6	80.3	95.7	115.8	105.4	91.6	78.4		High	7.761e-05	1.686e-09	7.01
55283	TGGT1_315750	hypothetical protein	transcript=TGGT1_315750-t26_1 | gene=TGGT1_315750 | organism=Toxoplasma_gondii_GT1 | gene_product=hypothetical protein | transcript_product=hypothetical protein | location=TGGT1_chrXI:4888664-4890249(-) | protein_length=231 | sequence_SO=chromosome | SO=protein_coding_gene | is_pseudo=false	[R].LFSPEGSFVMAPEVTPETPVRR.[A]	1xTMTpro [N-Term]; 1xPhospho [T18(100)]	TGGT1_315750-t26_1-p1 1xPhospho [T57(100)]	1	High	3.52755e-05	9.56086e-05	1	1	TGGT1_315750-t26_1-p1	TGGT1_315750-t26_1-p1 [40-61]	1	2830.42	0.9	-0.15	1	66.6	74	9.21	3.03	NA	NA	62.4	71.1	NA	NA	75.6	72.4		High	7.761e-05	1.738e-05	4.95
25201	TGGT1_246940	hypothetical protein	transcript=TGGT1_246940-t26_1 | gene=TGGT1_246940 | organism=Toxoplasma_gondii_GT1 | gene_product=hypothetical protein | transcript_product=hypothetical protein | location=TGGT1_chrXII:2958189-2959370(+) | protein_length=393 | sequence_SO=chromosome | SO=protein_coding_gene | is_pseudo=false	[R].EGSVSDSLPTAPHTPR.[G]	1xTMTpro [N-Term]; 2xPhospho [T10(100); T14(100)]	TGGT1_246940-t26_1-p1 2xPhospho [T294(100); T298(100)]	20	High	3.69414e-07	9.56086e-05	1	1	TGGT1_246940-t26_1-p1	TGGT1_246940-t26_1-p1 [285-300]	0	2114.95	1.089	0.12	1	79.1	72.6	13.82	29.37	64.9	75.9	90.6	82.4	46.6	61.6	91.5	85.6		High	0.0001044	2.448e-07	4.77
25200	TGGT1_246940	hypothetical protein	transcript=TGGT1_246940-t26_1 | gene=TGGT1_246940 | organism=Toxoplasma_gondii_GT1 | gene_product=hypothetical protein | transcript_product=hypothetical protein | location=TGGT1_chrXII:2958189-2959370(+) | protein_length=393 | sequence_SO=chromosome | SO=protein_coding_gene | is_pseudo=false	[R].EGSVSDSLPTAPHTPR.[G]	1xTMTpro [N-Term]; 1xPhospho [T14(100)]	TGGT1_246940-t26_1-p1 1xPhospho [T298(100)]	13	High	3.91656e-08	9.56086e-05	1	1	TGGT1_246940-t26_1-p1	TGGT1_246940-t26_1-p1 [285-300]	0	2034.98	1.087	0.12	1	156.6	144	12.15	12.52	152.1	141.8	187.4	161.3	131	132	157.1	167.8		High	7.761e-05	1.124e-08	6.27
55277	TGGT1_271100	NUC153 domain-containing protein	transcript=TGGT1_271100-t26_1 | gene=TGGT1_271100 | organism=Toxoplasma_gondii_GT1 | gene_product=NUC153 domain-containing protein [Source:UniProtKB/TrEMBL;Acc:S7V455] | transcript_product=NUC153 domain-containing protein | location=TGGT1_chrVIII:4713202-4723704(+) | protein_length=999 | sequence_SO=chromosome | SO=protein_coding_gene | is_pseudo=false	[R].LFSNPEFAIDPTNPNFK.[K]	1xTMTpro [K17]; 1xTMTpro [N-Term]; 1xPhospho [S3(100)]	TGGT1_271100-t26_1-p1 1xPhospho [S916(100)]	2	High	7.09037e-05	9.56086e-05	1	1	TGGT1_271100-t26_1-p1	TGGT1_271100-t26_1-p1 [914-930]	0	2639.34	0.96	-0.06	1	54	56.3	9.76	1.09	50.4	57.9	NA	NA	55.8	56.7	NA	NA		High	0.0001044	4.154e-05	3.39
77635	TGGT1_312230	putative DNA topoisomerase 2	transcript=TGGT1_312230-t26_1 | gene=TGGT1_312230 | organism=Toxoplasma_gondii_GT1 | gene_product=DNA topoisomerase 2 [Source:UniProtKB/TrEMBL;Acc:S7W1T2] | transcript_product=putative DNA topoisomerase 2 | location=TGGT1_chrXI:2472947-2490813(-) | protein_length=1658 | sequence_SO=chromosome | SO=protein_coding_gene | is_pseudo=false	[R].RKPLVLSSDDESEEELETTSR.[K]	1xTMTpro [K2]; 1xTMTpro [N-Term]; 3xPhospho [S7(100); S8(100); S12(100)]	TGGT1_312230-t26_1-p1 3xPhospho [S1551(100); S1552(100); S1556(100)]	3	High	2.15739e-07	9.56086e-05	1	1	TGGT1_312230-t26_1-p1	TGGT1_312230-t26_1-p1 [1545-1565]	1	3268.49	0.752	-0.41	1	26.2	34.9	11.17	11.49	NA	NA	24.2	28.4	NA	NA	37.9	32.2		High	7.761e-05	7.083e-08	7.47
96827	TGGT1_289100	hypothetical protein	transcript=TGGT1_289100-t26_1 | gene=TGGT1_289100 | organism=Toxoplasma_gondii_GT1 | gene_product=hypothetical protein | transcript_product=hypothetical protein | location=TGGT1_chrIX:2793313-2802752(+) | protein_length=698 | sequence_SO=chromosome | SO=protein_coding_gene | is_pseudo=false	[R].SSSAVGGHLAPVLQK.[V]	1xTMTpro [K15]; 1xTMTpro [N-Term]; 1xPhospho [S]		4	High	6.54579e-06	9.56086e-05	1	1	TGGT1_289100-t26_1-p1	TGGT1_289100-t26_1-p1 [187-201]	0	2139.18	0.885	-0.18	1	53.8	60.8	80.03	78.36	156.4	99.9	29	26.5	132.3	153.1	28	27.8		High	0.0001044	4.006e-06	3.77
96834	TGGT1_255450	hypothetical protein	transcript=TGGT1_255450-t26_1 | gene=TGGT1_255450 | organism=Toxoplasma_gondii_GT1 | gene_product=hypothetical protein | transcript_product=hypothetical protein | location=TGGT1_chrVIIb:4723734-4728848(+) | protein_length=625 | sequence_SO=chromosome | SO=protein_coding_gene | is_pseudo=false	[R].SSSAYSGSNLDTR.[S]	1xTMTpro [N-Term]; 1xPhospho [S3(99.7)]	TGGT1_255450-t26_1-p1 1xPhospho [S474(99.7)]	5	High	9.72899e-05	9.56086e-05	1	1	TGGT1_255450-t26_1-p1	TGGT1_255450-t26_1-p1 [472-484]	0	1728.78	0.749	-0.42	1	19.9	26.5	5.11	11.32	NA	NA	19.2	20.6	NA	NA	28.7	24.5		High	0.0001044	5.72e-05	3.07
24847	TGGT1_266830	Sec7 domain-containing protein	transcript=TGGT1_266830-t26_1 | gene=TGGT1_266830 | organism=Toxoplasma_gondii_GT1 | gene_product=Sec7 domain-containing protein [Source:UniProtKB/TrEMBL;Acc:S7UG59] | transcript_product=Sec7 domain-containing protein | location=TGGT1_chrIX:771005-786577(-) | protein_length=3987 | sequence_SO=chromosome | SO=protein_coding_gene | is_pseudo=false	[R].EGPHSESDFFR.[G]	1xTMTpro [N-Term]; 1xPhospho [S5(100)]	TGGT1_266830-t26_1-p1 1xPhospho [S3733(100)]	5	High	0.000116417	9.56086e-05	1	1	TGGT1_266830-t26_1-p1	TGGT1_266830-t26_1-p1 [3729-3739]	0	1691.74	0.75	-0.41	1	15.7	21	24.99	14.95	15.3	23.6	16.2	14	16.5	23.8	20.4	21.5		High	7.761e-05	6.477e-05	3.34
55472	TGGT1_313990	CBF/Mak21 family protein	transcript=TGGT1_313990-t26_1 | gene=TGGT1_313990 | organism=Toxoplasma_gondii_GT1 | gene_product=CBF domain-containing protein [Source:UniProtKB/TrEMBL;Acc:S7W9B0] | transcript_product=CBF/Mak21 family protein | location=TGGT1_chrXI:3822824-3831741(+) | protein_length=1361 | sequence_SO=chromosome | SO=protein_coding_gene | is_pseudo=false	[K].LGDRTSDEGSDEERVDESDEEK.[Q]	1xTMTpro [K22]; 1xTMTpro [N-Term]; 3xPhospho [S10(100); S18(100); T/S]	TGGT1_313990-t26_1-p1 3xPhospho [S1198(100); S1206(100); T/S]	4	High	5.29522e-05	9.56086e-05	1	1	TGGT1_313990-t26_1-p1	TGGT1_313990-t26_1-p1 [1189-1210]	2	3345.36	1.132	0.18	1	84.7	74.9	31.52	15.74	102.1	108.6	53	70.4	73.7	86.4	58.4	76.1		High	7.761e-05	2.708e-05	4.7
77551	TGGT1_272550	hypothetical protein	transcript=TGGT1_272550-t26_1 | gene=TGGT1_272550 | organism=Toxoplasma_gondii_GT1 | gene_product=SMK-1 domain-containing protein [Source:UniProtKB/TrEMBL;Acc:S7V392] | transcript_product=hypothetical protein | location=TGGT1_chrVIII:3886178-3900147(+) | protein_length=1896 | sequence_SO=chromosome | SO=protein_coding_gene | is_pseudo=false	[R].RHSSDDEAQSAGEELDK.[R]	1xTMTpro [K17]; 1xTMTpro [N-Term]; 3xPhospho [S3(100); S4(100); S10(100)]	TGGT1_272550-t26_1-p1 3xPhospho [S1856(100); S1857(100); S1863(100)]	12	High	0.000115037	9.56086e-05	1	1	TGGT1_272550-t26_1-p1	TGGT1_272550-t26_1-p1 [1854-1870]	1	2722.13	1.344	0.43	1	27.2	20.3	81.09	86.67	66	55.9	8.8	13.2	49.4	55	8.3	6.8		High	0.0001044	6.803e-05	4.22
96994	TGGT1_313370	hypothetical protein	transcript=TGGT1_313370-t26_1 | gene=TGGT1_313370 | organism=Toxoplasma_gondii_GT1 | gene_product=hypothetical protein | transcript_product=hypothetical protein | location=TGGT1_chrXI:3281764-3287206(+) | protein_length=1687 | sequence_SO=chromosome | SO=protein_coding_gene | is_pseudo=false	[R].SSSGGTEPRPGVSGAGAGAK.[G]	1xTMTpro [K20]; 1xTMTpro [N-Term]; 1xPhospho [S3(99.4)]	TGGT1_313370-t26_1-p1 1xPhospho [S511(99.4)]	5	High	7.78912e-05	9.56086e-05	1	1	TGGT1_313370-t26_1-p1	TGGT1_313370-t26_1-p1 [509-528]	0	2418.23	1.239	0.31	1	182.3	147.1	51.9	42.24	87.3	124.3	267.2	281.6	101.9	106.7	202.9	237.9		High	7.761e-05	4.144e-05	3.26
97003	TGGT1_290640	putative DNA mismatch repair protein MSH6-1	transcript=TGGT1_290640-t26_1 | gene=TGGT1_290640 | organism=Toxoplasma_gondii_GT1 | gene_product=DNA mismatch repair protein [Source:UniProtKB/TrEMBL;Acc:S7UQA4] | transcript_product=putative DNA mismatch repair protein MSH6-1 | location=TGGT1_chrIX:3604395-3616262(-) | protein_length=1561 | sequence_SO=chromosome | SO=protein_coding_gene | is_pseudo=false	[R].SSSGNEEDPGSEDVR.[K]	1xTMTpro [N-Term]; 1xPhospho [S3(99.6)]	TGGT1_290640-t26_1-p1 1xPhospho [S160(99.6)]	8	High	3.3708e-05	9.56086e-05	1	1	TGGT1_290640-t26_1-p1	TGGT1_290640-t26_1-p1 [158-172]	0	1948.81	1.138	0.19	1	47.1	41.4	55.25	66.7	30.2	26	73.4	83.6	25.1	14.7	76.6	68.2		High	7.761e-05	1.655e-05	4.7
24828	TGGT1_214880	hypothetical protein	transcript=TGGT1_214880-t26_1 | gene=TGGT1_214880 | organism=Toxoplasma_gondii_GT1 | gene_product=hypothetical protein | transcript_product=hypothetical protein | location=TGGT1_chrX:6454346-6458141(-) | protein_length=931 | sequence_SO=chromosome | SO=protein_coding_gene | is_pseudo=false	[K].EGNTVKTPPLPSSAR.[R]	1xTMTpro [K6]; 1xTMTpro [N-Term]; 1xPhospho [T7(100)]	TGGT1_214880-t26_1-p1 1xPhospho [T296(100)]	6	High	3.95111e-05	9.56086e-05	1	1	TGGT1_214880-t26_1-p1	TGGT1_214880-t26_1-p1 [290-304]	1	2242.21	1.103	0.14	1	108.7	98.6	9.52	18.49	98.8	106	123.6	111.5	84	84.4	115.2	117.4		High	7.761e-05	1.969e-05	3.4
24799	TGGT1_300180	hypothetical protein	transcript=TGGT1_300180-t26_1 | gene=TGGT1_300180 | organism=Toxoplasma_gondii_GT1 | gene_product=hypothetical protein | transcript_product=hypothetical protein | location=TGGT1_chrXII:130239-132087(-) | protein_length=329 | sequence_SO=chromosome | SO=protein_coding_gene | is_pseudo=false	[R].EGNEEESENDEGACGGSR.[G]	1xMethylthio [C14]; 1xTMTpro [N-Term]; 1xPhospho [S7(100)]	TGGT1_300180-t26_1-p1 1xMethylthio [C107]; 1xPhospho [S100(100)]	6	High	4.69631e-06	9.56086e-05	1	1	TGGT1_300180-t26_1-p1	TGGT1_300180-t26_1-p1 [94-111]	0	2298.84	1.594	0.67	1	18.2	11.4	5.01	8.38	NA	NA	17.5	18.8	NA	NA	10.7	12.1		High	7.761e-05	1.962e-06	4.51
97005	TGGT1_290640	putative DNA mismatch repair protein MSH6-1	transcript=TGGT1_290640-t26_1 | gene=TGGT1_290640 | organism=Toxoplasma_gondii_GT1 | gene_product=DNA mismatch repair protein [Source:UniProtKB/TrEMBL;Acc:S7UQA4] | transcript_product=putative DNA mismatch repair protein MSH6-1 | location=TGGT1_chrIX:3604395-3616262(-) | protein_length=1561 | sequence_SO=chromosome | SO=protein_coding_gene | is_pseudo=false	[R].SSSGNEEDPGSEDVRK.[L]	1xTMTpro [K16]; 1xTMTpro [N-Term]; 1xPhospho [S3(99.7)]	TGGT1_290640-t26_1-p1 1xPhospho [S160(99.7)]	15	High	5.83115e-06	9.56086e-05	1	1	TGGT1_290640-t26_1-p1	TGGT1_290640-t26_1-p1 [158-173]	1	2381.11	0.965	-0.05	1	489.1	507	7.24	3.31	515.3	461.1	531.4	464.2	503.7	526	485.6	510.3		High	0.0001044	3.579e-06	3.22
97008	TGGT1_261230	ankyrin repeat-containing protein	transcript=TGGT1_261230-t26_1 | gene=TGGT1_261230 | organism=Toxoplasma_gondii_GT1 | gene_product=ANK_REP_REGION domain-containing protein [Source:UniProtKB/TrEMBL;Acc:S7UYH5] | transcript_product=ankyrin repeat-containing protein | location=TGGT1_chrVIIb:1786572-1792641(-) | protein_length=1382 | sequence_SO=chromosome | SO=protein_coding_gene | is_pseudo=false	[R].SSSGPGAQESSGK.[R]	1xTMTpro [K13]; 1xTMTpro [N-Term]; 1xPhospho [S]		7	High	9.12274e-05	9.56086e-05	1	1	TGGT1_261230-t26_1-p1	TGGT1_261230-t26_1-p1 [1307-1319]	0	1866.91	0.825	-0.28	1	34.2	41.5	86.53	64.94	15.3	7.5	76.6	80	13.4	28.2	61.1	76.8		High	7.761e-05	4.933e-05	3.31
55483	TGGT1_249390	glutamate/leucine/phenylalanine/valine dehydrogenase family protein	transcript=TGGT1_249390-t26_1 | gene=TGGT1_249390 | organism=Toxoplasma_gondii_GT1 | gene_product=ELFV_dehydrog domain-containing protein [Source:UniProtKB/TrEMBL;Acc:S7W941] | transcript_product=glutamate/leucine/phenylalanine/valine dehydrogenase family protein | location=TGGT1_chrXII:4441593-4452115(+) | protein_length=1206 | sequence_SO=chromosome | SO=protein_coding_gene | is_pseudo=false	[K].LGDSTLFGTVDLTATSEFRPMSQK.[Y]	1xOxidation [M21]; 1xTMTpro [K24]; 1xTMTpro [N-Term]; 1xPhospho [S4(99.6)]	TGGT1_249390-t26_1-p1 1xPhospho [S169(99.6)]	2	High	1.72433e-09	9.56086e-05	1	1	TGGT1_249390-t26_1-p1	TGGT1_249390-t26_1-p1 [166-189]	0	3305.66	0.951	-0.07	1	116.5	122.5	7.22	12.31	131.7	112.1	116.4	116.5	125.4	144.6	107.9	119.6		High	7.761e-05	3.882e-10	8.13
55489	TGGT1_280800	SWI2/SNF2 SRCAP/Ino80	transcript=TGGT1_280800-t26_1 | gene=TGGT1_280800 | organism=Toxoplasma_gondii_GT1 | gene_product=SWI2/SNF2 SRCAP/Ino80 [Source:UniProtKB/TrEMBL;Acc:S7W9I8] | transcript_product=SWI2/SNF2 SRCAP/Ino80 | location=TGGT1_chrVIIa:44179-60341(-) | protein_length=2894 | sequence_SO=chromosome | SO=protein_coding_gene | is_pseudo=false	[K].IGDTEHSADDDDDNRSEFSLDGGAFGK.[Q]	1xTMTpro [K27]; 1xTMTpro [N-Term]; 2xPhospho [S16(100); S19(100)]	TGGT1_280800-t26_1-p1 2xPhospho [S937(100); S940(100)]	1	High	5.58601e-06	9.56086e-05	1	1	TGGT1_280800-t26_1-p1	TGGT1_280800-t26_1-p1 [922-948]	1	3638.55	0.777	-0.36	1	31.5	40.6	40.67	28.01	42.4	23.5	NA	NA	49.6	33.2	NA	NA		High	0.0001044	3.433e-06	2.89
55494	TGGT1_214740	hypothetical protein	transcript=TGGT1_214740-t26_1 | gene=TGGT1_214740 | organism=Toxoplasma_gondii_GT1 | gene_product=hypothetical protein | transcript_product=hypothetical protein | location=TGGT1_chrX:6349454-6354178(+) | protein_length=1574 | sequence_SO=chromosome | SO=protein_coding_gene | is_pseudo=false	[R].IGDVSVGPTLSPR.[H]	1xTMTpro [N-Term]; 1xPhospho [S11(100)]	TGGT1_214740-t26_1-p1 1xPhospho [S1230(100)]	2	High	5.57679e-06	9.56086e-05	1	1	TGGT1_214740-t26_1-p1	TGGT1_214740-t26_1-p1 [1220-1232]	0	1681.88	1.158	0.21	1	45.1	38.9	23.31	36.6	58.6	50.4	34.4	40.4	47.9	59.9	31.7	26.8		High	7.761e-05	3.276e-06	4.57
97044	TGGT1_214990	hypothetical protein	transcript=TGGT1_214990-t26_1 | gene=TGGT1_214990 | organism=Toxoplasma_gondii_GT1 | gene_product=hypothetical protein | transcript_product=hypothetical protein | location=TGGT1_chrX:6550174-6562207(-) | protein_length=3441 | sequence_SO=chromosome | SO=protein_coding_gene | is_pseudo=false	[R].SSSLAGAVGGPDPPR.[E]	1xTMTpro [N-Term]; 1xPhospho [S3(99.2)]	TGGT1_214990-t26_1-p1 1xPhospho [S2100(99.2)]	4	High	7.00425e-06	9.56086e-05	1	1	TGGT1_214990-t26_1-p1	TGGT1_214990-t26_1-p1 [2098-2112]	0	1751.86	1.123	0.17	1	47.9	42.7	24.04	3.02	NA	NA	40.4	56.9	NA	NA	41.8	43.6		High	7.761e-05	3.024e-06	4.38
77531	TGGT1_311250	hypothetical protein	transcript=TGGT1_311250-t26_1 | gene=TGGT1_311250 | organism=Toxoplasma_gondii_GT1 | gene_product=BTB domain-containing protein [Source:UniProtKB/TrEMBL;Acc:S7UTR3] | transcript_product=hypothetical protein | location=TGGT1_chrXI:1874376-1883214(+) | protein_length=1848 | sequence_SO=chromosome | SO=protein_coding_gene | is_pseudo=false	[R].RHSGELVSALTAER.[R]	1xTMTpro [N-Term]; 1xPhospho [S3(100)]	TGGT1_311250-t26_1-p1 1xPhospho [S1625(100)]	3	High	7.94862e-05	9.56086e-05	1	1	TGGT1_311250-t26_1-p1	TGGT1_311250-t26_1-p1 [1623-1636]	1	1909.98	0.995	-0.01	1	104.4	104.9	3.07	3.85	NA	NA	102.2	106.7	NA	NA	102.1	107.8		High	7.761e-05	4.236e-05	3.66
96979	TGGT1_313910	RNA recognition motif 2 protein	transcript=TGGT1_313910-t26_1 | gene=TGGT1_313910 | organism=Toxoplasma_gondii_GT1 | gene_product=RRM_2 domain-containing protein [Source:UniProtKB/TrEMBL;Acc:S7UU31] | transcript_product=RNA recognition motif 2 protein | location=TGGT1_chrXI:3766770-3770119(+) | protein_length=903 | sequence_SO=chromosome | SO=protein_coding_gene | is_pseudo=false	[R].SSSGDGGAPDMPGVSGSGSGR.[T]	1xTMTpro [N-Term]; 1xPhospho [S]		10	High	1.74266e-07	9.56086e-05	1	1	TGGT1_313910-t26_1-p1	TGGT1_313910-t26_1-p1 [824-844]	0	2205.94	1.034	0.05	1	48.8	47.2	25.63	10.9	68.7	52.3	37.9	45.5	48.1	46.2	48.2	37.9		High	7.761e-05	5.627e-08	5.39
97053	TGGT1_230400	hypothetical protein	transcript=TGGT1_230400-t26_1 | gene=TGGT1_230400 | organism=Toxoplasma_gondii_GT1 | gene_product=hypothetical protein | transcript_product=hypothetical protein | location=TGGT1_chrVIII:738672-751636(+) | protein_length=2233 | sequence_SO=chromosome | SO=protein_coding_gene | is_pseudo=false	[R].SSSLASPQSHAAPETVDR.[R]	1xTMTpro [N-Term]; 1xPhospho [S6(100)]	TGGT1_230400-t26_1-p1 1xPhospho [S1729(100)]	6	High	3.34897e-05	9.56086e-05	1	1	TGGT1_230400-t26_1-p1	TGGT1_230400-t26_1-p1 [1724-1741]	0	2224.06	1.141	0.19	1	37.8	33.1	66.59	62.79	58.7	72.9	13.2	24.3	63.9	53	15	20.7		High	7.761e-05	1.644e-05	4.05
55528	TGGT1_212130	phospholipase, patatin family protein	transcript=TGGT1_212130-t26_1 | gene=TGGT1_212130 | organism=Toxoplasma_gondii_GT1 | gene_product=PNPLA domain-containing protein [Source:UniProtKB/TrEMBL;Acc:S7UWG7] | transcript_product=phospholipase, patatin family protein | location=TGGT1_chrX:3947536-3959836(+) | protein_length=994 | sequence_SO=chromosome | SO=protein_coding_gene | is_pseudo=false	[R].LGEGEGAAGEGSK.[D]	1xTMTpro [K13]; 1xTMTpro [N-Term]; 1xPhospho [S12(100)]	TGGT1_212130-t26_1-p1 1xPhospho [S448(100)]	2	High	7.94862e-05	9.56086e-05	1	1	TGGT1_212130-t26_1-p1	TGGT1_212130-t26_1-p1 [437-449]	0	1849.92	0.992	-0.01	NA	7.4	7.4	5.68	NA	NA	NA	7.1	7.7	NA	NA	NA	7.4		High	0.0001044	4.659e-05	3.24
77527	TGGT1_292235	hypothetical protein	transcript=TGGT1_292235-t26_1 | gene=TGGT1_292235 | organism=Toxoplasma_gondii_GT1 | gene_product=RING-type domain-containing protein [Source:UniProtKB/TrEMBL;Acc:S7UQ35] | transcript_product=hypothetical protein | location=TGGT1_chrIX:4439011-4446274(-) | protein_length=1451 | sequence_SO=chromosome | SO=protein_coding_gene | is_pseudo=false	[R].RHSEEAGGAETAR.[D]	1xTMTpro [N-Term]; 1xPhospho [S3(100)]	TGGT1_292235-t26_1-p1 1xPhospho [S1012(100)]	2	High	0.000107533	9.56086e-05	1	1	TGGT1_292235-t26_1-p1	TGGT1_292235-t26_1-p1 [1010-1022]	1	1754.81	1.735	0.8	1	16.3	9.4	13.5	7.76	NA	NA	14.8	17.9	NA	NA	9.9	8.9		High	7.761e-05	5.922e-05	3.42
97069	TGGT1_234470	hypothetical protein	transcript=TGGT1_234470-t26_1 | gene=TGGT1_234470 | organism=Toxoplasma_gondii_GT1 | gene_product=hypothetical protein | transcript_product=hypothetical protein | location=TGGT1_chrX:4303922-4306325(-) | protein_length=587 | sequence_SO=chromosome | SO=protein_coding_gene | is_pseudo=false	[R].SSSLFGDDSGPANK.[N]	1xTMTpro [K14]; 1xTMTpro [N-Term]; 1xPhospho [S3(99.7)]	TGGT1_234470-t26_1-p1 1xPhospho [S570(99.7)]	2	High	5.78099e-05	9.56086e-05	1	1	TGGT1_234470-t26_1-p1	TGGT1_234470-t26_1-p1 [568-581]	0	2070	0.75	-0.42	1	106.5	142.1	6.63	20.37	101.7	111.7	NA	NA	122.9	164.3	NA	NA		High	0.0001044	3.384e-05	3.9
97071	TGGT1_248510	hypothetical protein	transcript=TGGT1_248510-t26_1 | gene=TGGT1_248510 | organism=Toxoplasma_gondii_GT1 | gene_product=hypothetical protein | transcript_product=hypothetical protein | location=TGGT1_chrXII:3828420-3868593(-) | protein_length=11946 | sequence_SO=chromosome | SO=protein_coding_gene | is_pseudo=false	[R].SSSLGETHEYR.[S]	1xTMTpro [N-Term]; 1xPhospho [S/T/Y]		4	High	0.000105604	9.56086e-05	1	1	TGGT1_248510-t26_1-p1	TGGT1_248510-t26_1-p1 [11567-11577]	0	1649.75	0.754	-0.41	1	17.9	23.8	31.03	9.96	NA	NA	22.4	14.3	NA	NA	25.5	22.2		High	7.761e-05	5.802e-05	3.28
24702	TGGT1_248740	hypothetical protein	transcript=TGGT1_248740-t26_1 | gene=TGGT1_248740 | organism=Toxoplasma_gondii_GT1 | gene_product=hypothetical protein | transcript_product=hypothetical protein | location=TGGT1_chrXII:4066708-4074096(-) | protein_length=1283 | sequence_SO=chromosome | SO=protein_coding_gene | is_pseudo=false	[K].EGHASSSADEGSQSSLKK.[V]	2xTMTpro [K17; K18]; 1xTMTpro [N-Term]; 3xPhospho [S6(98.2); S12(99.1); S15(99.1)]	TGGT1_248740-t26_1-p1 3xPhospho [S646(98.2); S652(99.1); S655(99.1)]	6	High	9.09473e-05	9.56086e-05	1	1	TGGT1_248740-t26_1-p1	TGGT1_248740-t26_1-p1 [641-658]	1	2957.35	1.232	0.3	1	29.7	24.1	48.93	40.76	9.8	24.5	39.8	35.9	19.2	11.5	31	30.3		High	7.761e-05	4.913e-05	3.42
24700	TGGT1_248740	hypothetical protein	transcript=TGGT1_248740-t26_1 | gene=TGGT1_248740 | organism=Toxoplasma_gondii_GT1 | gene_product=hypothetical protein | transcript_product=hypothetical protein | location=TGGT1_chrXII:4066708-4074096(-) | protein_length=1283 | sequence_SO=chromosome | SO=protein_coding_gene | is_pseudo=false	[K].EGHASSSADEGSQSSLK.[K]	1xTMTpro [K17]; 1xTMTpro [N-Term]; 3xPhospho [S5(100); S6(100); S7(100)]	TGGT1_248740-t26_1-p1 3xPhospho [S645(100); S646(100); S647(100)]	21	High	2.92698e-06	9.56086e-05	1	1	TGGT1_248740-t26_1-p1	TGGT1_248740-t26_1-p1 [641-657]	0	2525.05	1.154	0.21	1	47.1	40.8	32.93	26.44	67	61.5	36.1	35.8	50.5	47.9	34.8	28.1		High	0.0001044	1.83e-06	5.05
24699	TGGT1_248740	hypothetical protein	transcript=TGGT1_248740-t26_1 | gene=TGGT1_248740 | organism=Toxoplasma_gondii_GT1 | gene_product=hypothetical protein | transcript_product=hypothetical protein | location=TGGT1_chrXII:4066708-4074096(-) | protein_length=1283 | sequence_SO=chromosome | SO=protein_coding_gene | is_pseudo=false	[K].EGHASSSADEGSQSSLK.[K]	1xTMTpro [K17]; 1xTMTpro [N-Term]; 2xPhospho [S6(100); S7(100)]	TGGT1_248740-t26_1-p1 2xPhospho [S646(100); S647(100)]	40	High	9.39389e-07	9.56086e-05	1	1	TGGT1_248740-t26_1-p1	TGGT1_248740-t26_1-p1 [641-657]	0	2445.08	1.082	0.11	1	223.5	206.6	38.08	46.45	151.8	162.9	306.6	316.7	131.8	138.6	308.1	324.6		High	7.761e-05	3.461e-07	4.87
24698	TGGT1_248740	hypothetical protein	transcript=TGGT1_248740-t26_1 | gene=TGGT1_248740 | organism=Toxoplasma_gondii_GT1 | gene_product=hypothetical protein | transcript_product=hypothetical protein | location=TGGT1_chrXII:4066708-4074096(-) | protein_length=1283 | sequence_SO=chromosome | SO=protein_coding_gene | is_pseudo=false	[K].EGHASSSADEGSQSSLK.[K]	1xTMTpro [K17]; 1xTMTpro [N-Term]; 1xPhospho [S7(99.8)]	TGGT1_248740-t26_1-p1 1xPhospho [S647(99.8)]	19	High	2.54279e-08	9.56086e-05	1	1	TGGT1_248740-t26_1-p1	TGGT1_248740-t26_1-p1 [641-657]	0	2365.12	1.047	0.07	1	152.9	146	15.43	14.16	154.5	195.9	139	151.3	168.7	157	122.7	135.8		High	7.761e-05	7.068e-09	6.43
55541	TGGT1_311230	hypothetical protein	transcript=TGGT1_311230-t26_1 | gene=TGGT1_311230 | organism=Toxoplasma_gondii_GT1 | gene_product=hypothetical protein | transcript_product=hypothetical protein | location=TGGT1_chrXI:1844321-1862670(+) | protein_length=4603 | sequence_SO=chromosome | SO=protein_coding_gene | is_pseudo=false	[R].LGEQSLSTGSR.[H]	1xTMTpro [N-Term]; 1xPhospho [S10(99.7)]	TGGT1_311230-t26_1-p1 1xPhospho [S4506(99.7)]	5	High	0.000134453	9.56086e-05	1	1	TGGT1_311230-t26_1-p1	TGGT1_311230-t26_1-p1 [4497-4507]	0	1518.75	1.098	0.14	1	35.3	32.2	44.15	30.94	27	20.2	55.5	46.2	25.5	21.7	40.6	40.5		High	7.761e-05	7.623e-05	3.64
55551	TGGT1_288890	hypothetical protein	transcript=TGGT1_288890-t26_1 | gene=TGGT1_288890 | organism=Toxoplasma_gondii_GT1 | gene_product=hypothetical protein | transcript_product=hypothetical protein | location=TGGT1_chrIX:2600683-2608806(-) | protein_length=1979 | sequence_SO=chromosome | SO=protein_coding_gene | is_pseudo=false	[R].LGESSSDGVPSPAFAHR.[K]	1xTMTpro [N-Term]; 1xPhospho [S5(99.2)]	TGGT1_288890-t26_1-p1 1xPhospho [S254(99.2)]	1	High	1.90937e-05	9.56086e-05	1	1	TGGT1_288890-t26_1-p1	TGGT1_288890-t26_1-p1 [250-266]	0	2097.99	1.145	0.2	1	34.4	30	52.17	26.51	23.3	50.6	NA	NA	24.8	36.3	NA	NA		High	0.0001044	1.137e-05	3.66
24657	TGGT1_223080	hypothetical protein	transcript=TGGT1_223080-t26_1 | gene=TGGT1_223080 | organism=Toxoplasma_gondii_GT1 | gene_product=hypothetical protein | transcript_product=hypothetical protein | location=TGGT1_chrII:1409911-1420473(-) | protein_length=2909 | sequence_SO=chromosome | SO=protein_coding_gene | is_pseudo=false	[R].EGGPRDSPGGLATSNPR.[E]	1xTMTpro [N-Term]; 1xPhospho [S7(100)]	TGGT1_223080-t26_1-p1 1xPhospho [S2358(100)]	4	High	4.42378e-05	9.56086e-05	1	1	TGGT1_223080-t26_1-p1	TGGT1_223080-t26_1-p1 [2352-2368]	1	2051.98	0.965	-0.05	1	67.2	69.6	70.3	73.14	151.1	127.7	35.4	34	138.5	149.8	35	30.1		High	0.0001044	2.595e-05	2.51
24743	TGGT1_203820	hypothetical protein	transcript=TGGT1_203820-t26_1 | gene=TGGT1_203820 | organism=Toxoplasma_gondii_GT1 | gene_product=hypothetical protein | transcript_product=hypothetical protein | location=TGGT1_chrVIIa:2103925-2108718(-) | protein_length=1268 | sequence_SO=chromosome | SO=protein_coding_gene | is_pseudo=false	[K].EGIDESEDEEGEIDHLK.[N]	1xTMTpro [K17]; 1xTMTpro [N-Term]; 1xPhospho [S6(100)]	TGGT1_203820-t26_1-p1 1xPhospho [S1060(100)]	9	High	1.27947e-08	9.56086e-05	1	1	TGGT1_203820-t26_1-p1	TGGT1_203820-t26_1-p1 [1055-1071]	0	2632.22	1.15	0.2	1	295.5	256.9	66.84	69.23	125.9	167.4	567.1	521.5	136.9	112.1	508.3	482		High	7.761e-05	3.366e-09	6.62
25071	TGGT1_294340	hypothetical protein	transcript=TGGT1_294340-t26_1 | gene=TGGT1_294340 | organism=Toxoplasma_gondii_GT1 | gene_product=hypothetical protein | transcript_product=hypothetical protein | location=TGGT1_chrIa:797278-800698(+) | protein_length=345 | sequence_SO=chromosome | SO=protein_coding_gene | is_pseudo=false	[K].EGSFMIAGSPSHPER.[L]	1xOxidation [M5]; 1xTMTpro [N-Term]; 1xPhospho [S3(100)]	TGGT1_294340-t26_1-p1 1xPhospho [S5(100)]	3	High	6.87066e-05	9.56086e-05	1	1	TGGT1_294340-t26_1-p1	TGGT1_294340-t26_1-p1 [3-17]	0	2001.91	1.104	0.14	1	23.4	21.2	36.74	25.45	20.1	35.4	27.2	14.7	22.5	30	16.7	19.9		High	7.761e-05	3.606e-05	3.27
24876	TGGT1_253750	PLU-1 family protein	transcript=TGGT1_253750-t26_1 | gene=TGGT1_253750 | organism=Toxoplasma_gondii_GT1 | gene_product=PLU-1 domain-containing protein [Source:UniProtKB/TrEMBL;Acc:S7ULT6] | transcript_product=PLU-1 family protein | location=TGGT1_chrIII:1126566-1154665(-) | protein_length=8088 | sequence_SO=chromosome | SO=protein_coding_gene | is_pseudo=false	[R].EGQAQVLSSR.[K]	1xTMTpro [N-Term]; 1xPhospho [S9(99.8)]	TGGT1_253750-t26_1-p1 1xPhospho [S4922(99.8)]	8	High	5.29522e-05	9.56086e-05	1	1	TGGT1_253750-t26_1-p1	TGGT1_253750-t26_1-p1 [4914-4923]	0	1458.73	1.084	0.12	1	49	45.2	10.49	27.52	NA	NA	45.5	52.8	NA	NA	55.1	37.1		High	0.0001044	3.103e-05	3.48
24903	TGGT1_262710	Ctr copper transporter family protein	transcript=TGGT1_262710-t26_1 | gene=TGGT1_262710 | organism=Toxoplasma_gondii_GT1 | gene_product=Copper transporter [Source:UniProtKB/TrEMBL;Acc:S7W6R7] | transcript_product=Ctr copper transporter family protein | location=TGGT1_chrVIIb:1040235-1042044(+) | protein_length=375 | sequence_SO=chromosome | SO=protein_coding_gene | is_pseudo=false	[K].EGQSSAASPSSAIVER.[L]	1xTMTpro [N-Term]; 1xPhospho [S4(100)]	TGGT1_262710-t26_1-p1 1xPhospho [S282(100)]	11	High	4.57376e-06	9.56086e-05	1	1	TGGT1_262710-t26_1-p1	TGGT1_262710-t26_1-p1 [279-294]	0	1959.93	0.979	-0.03	1	40.8	41.7	3.08	0.84	NA	NA	39.9	41.7	NA	NA	41.4	41.9		High	7.761e-05	1.909e-06	4.83
96874	TGGT1_314480	hypothetical protein	transcript=TGGT1_314480-t26_1 | gene=TGGT1_314480 | organism=Toxoplasma_gondii_GT1 | gene_product=hypothetical protein | transcript_product=hypothetical protein | location=TGGT1_chrXI:4085755-4095302(+) | protein_length=830 | sequence_SO=chromosome | SO=protein_coding_gene | is_pseudo=false	[R].SSSDGSLSSPPKK.[L]	2xTMTpro [K12; K13]; 1xTMTpro [N-Term]; 1xPhospho [S9(99.7)]	TGGT1_314480-t26_1-p1 1xPhospho [S623(99.7)]	9	High	1.54234e-05	9.56086e-05	1	1	TGGT1_314480-t26_1-p1	TGGT1_314480-t26_1-p1 [615-627]	1	2269.23	0.956	-0.07	1	131	137.1	65.45	60.84	61.6	73.7	233.1	252.7	67.6	81.2	246.2	231.5		High	7.761e-05	7.095e-06	3.99
96875	TGGT1_262390	TLD protein	transcript=TGGT1_262390-t26_1 | gene=TGGT1_262390 | organism=Toxoplasma_gondii_GT1 | gene_product=TLDc domain-containing protein [Source:UniProtKB/TrEMBL;Acc:S7UYB4] | transcript_product=TLD protein | location=TGGT1_chrVIIb:1280695-1289391(+) | protein_length=1392 | sequence_SO=chromosome | SO=protein_coding_gene | is_pseudo=false	[R].SSSDGWLGTSVGSDR.[S]	1xTMTpro [N-Term]; 1xPhospho [S/T]		2	High	0.000110649	9.56086e-05	1	1	TGGT1_262390-t26_1-p1	TGGT1_262390-t26_1-p1 [1159-1173]	0	1894.85	0.914	-0.13	1	45.7	50	16.54	16.78	38.5	43	48.7	56.3	57.6	38.5	47.2	53.1		High	7.761e-05	6.114e-05	4.38
55386	TGGT1_313270	hypothetical protein	transcript=TGGT1_313270-t26_1 | gene=TGGT1_313270 | organism=Toxoplasma_gondii_GT1 | gene_product=hypothetical protein | transcript_product=hypothetical protein | location=TGGT1_chrXI:3183953-3196338(+) | protein_length=2799 | sequence_SO=chromosome | SO=protein_coding_gene | is_pseudo=false	[K].LGANNASGGEGAEGAGLLR.[K]	1xTMTpro [N-Term]; 1xPhospho [S7(100)]	TGGT1_313270-t26_1-p1 1xPhospho [S1408(100)]	2	High	1.08556e-07	9.56086e-05	1	1	TGGT1_313270-t26_1-p1	TGGT1_313270-t26_1-p1 [1402-1420]	0	2098.02	1.157	0.21	1	76.1	65.8	7.31	11.25	72.9	79.5	69.3	81.1	68	77.8	60.3	63.7		High	7.761e-05	3.378e-08	6.71
96881	TGGT1_245560	hypothetical protein	transcript=TGGT1_245560-t26_1 | gene=TGGT1_245560 | organism=Toxoplasma_gondii_GT1 | gene_product=hypothetical protein | transcript_product=hypothetical protein | location=TGGT1_chrXII:2306830-2317367(+) | protein_length=1998 | sequence_SO=chromosome | SO=protein_coding_gene | is_pseudo=false	[R].SSSDSEASCNPSPAPLEER.[Q]	1xMethylthio [C9]; 1xTMTpro [N-Term]; 1xPhospho [S]	TGGT1_245560-t26_1-p1 1xMethylthio [C75]	4	High	4.64958e-07	9.56086e-05	1	1	TGGT1_245560-t26_1-p1	TGGT1_245560-t26_1-p1 [67-85]	0	2393	1.012	0.02	1	104.2	102.9	11.97	10.48	97.1	125.5	99.4	109.2	109.4	116.5	96.8	93.1		High	7.761e-05	1.701e-07	5.6
96891	TGGT1_306540	phosphotransferase enzyme family protein	transcript=TGGT1_306540-t26_1 | gene=TGGT1_306540 | organism=Toxoplasma_gondii_GT1 | gene_product=Phosphotransferase enzyme family protein [Source:UniProtKB/TrEMBL;Acc:A0A125YUJ4] | transcript_product=phosphotransferase enzyme family protein | location=TGGT1_chrIX:5946997-5952108(+) | protein_length=547 | sequence_SO=chromosome | SO=protein_coding_gene | is_pseudo=false	[R].SSSEAANSAASLSAVSPR.[G]	1xTMTpro [N-Term]; 1xPhospho [S]		2	High	1.60834e-06	9.56086e-05	1	1	TGGT1_306540-t26_1-p1	TGGT1_306540-t26_1-p1 [21-38]	0	2075.99	1.064	0.09	1	44.3	41.7	17.68	15.25	NA	NA	39.1	50.3	NA	NA	46.4	37.4		High	7.761e-05	6.175e-07	4.97
55393	TGGT1_294550	dynein heavy chain	transcript=TGGT1_294550-t26_1 | gene=TGGT1_294550 | organism=Toxoplasma_gondii_GT1 | gene_product=Dynein heavy chain [Source:UniProtKB/TrEMBL;Acc:S7VWW7] | transcript_product=dynein heavy chain | location=TGGT1_chrIa:919161-949027(+) | protein_length=4974 | sequence_SO=chromosome | SO=protein_coding_gene | is_pseudo=false	[R].IGASAVEDDFADSCSSDDEDAEEK.[L]	1xMethylthio [C14]; 1xTMTpro [K24]; 1xTMTpro [N-Term]; 2xPhospho [S15(99.6); S16(99.6)]	TGGT1_294550-t26_1-p1 1xMethylthio [C1038]; 2xPhospho [S1039(99.6); S1040(99.6)]	3	High	2.20066e-07	9.56086e-05	1	1	TGGT1_294550-t26_1-p1	TGGT1_294550-t26_1-p1 [1025-1048]	0	3319.31	0.876	-0.19	1	25.3	28.9	86.8	82.37	55.3	75	11.6	8.9	76.8	67.8	12.3	12.3		High	7.761e-05	7.572e-08	4.72
55409	TGGT1_239885	hypothetical protein	transcript=TGGT1_239885-t26_1 | gene=TGGT1_239885 | organism=Toxoplasma_gondii_GT1 | gene_product=Protein kinase domain-containing protein [Source:UniProtKB/TrEMBL;Acc:S7UR52] | transcript_product=hypothetical protein | location=TGGT1_chrVI:587249-608334(-) | protein_length=6055 | sequence_SO=chromosome | SO=protein_coding_gene | is_pseudo=false	[R].LGATETSVGDTTR.[K]	1xTMTpro [N-Term]; 1xPhospho [T11(99.7)]	TGGT1_239885-t26_1-p1 1xPhospho [T2711(99.7)]	2	High	0.00012984	9.56086e-05	1	1	TGGT1_239885-t26_1-p1	TGGT1_239885-t26_1-p1 [2701-2713]	0	1691.82	0.991	-0.01	1	8.4	8.5	1.38	20.19	NA	NA	8.3	8.5	NA	NA	9.8	7.3		High	7.761e-05	7.317e-05	3.43
25034	TGGT1_211350	CBS domain-containing protein	transcript=TGGT1_211350-t26_1 | gene=TGGT1_211350 | organism=Toxoplasma_gondii_GT1 | gene_product=CBS domain-containing protein [Source:UniProtKB/TrEMBL;Acc:S7UJQ5] | transcript_product=CBS domain-containing protein | location=TGGT1_chrIV:1730896-1741521(+) | protein_length=1720 | sequence_SO=chromosome | SO=protein_coding_gene | is_pseudo=false	[K].EGSEEEDREVSPLVSR.[R]	1xTMTpro [N-Term]; 1xPhospho [S3(100)]	TGGT1_211350-t26_1-p1 1xPhospho [S1218(100)]	14	High	1.07909e-05	9.56086e-05	1	1	TGGT1_211350-t26_1-p1	TGGT1_211350-t26_1-p1 [1216-1231]	1	2202.02	1.147	0.2	1	220.3	192	45.55	51.55	146.6	147.4	329.1	346.7	105.5	125.8	293.2	308.1		High	7.761e-05	4.822e-06	4.08
55434	TGGT1_313830	AARP2CN (NUC121) domain-containing protein	transcript=TGGT1_313830-t26_1 | gene=TGGT1_313830 | organism=Toxoplasma_gondii_GT1 | gene_product=Bms1-type G domain-containing protein [Source:UniProtKB/TrEMBL;Acc:S7W2H0] | transcript_product=AARP2CN (NUC121) domain-containing protein | location=TGGT1_chrXI:3674749-3684807(+) | protein_length=1273 | sequence_SO=chromosome | SO=protein_coding_gene | is_pseudo=false	[R].IGDAGEESEETER.[S]	1xTMTpro [N-Term]; 1xPhospho [S8(100)]	TGGT1_313830-t26_1-p1 1xPhospho [S655(100)]	11	High	3.25242e-05	9.56086e-05	1	1	TGGT1_313830-t26_1-p1	TGGT1_313830-t26_1-p1 [648-660]	0	1805.78	1.04	0.06	1	73.4	70.5	43.64	43	47.8	50.1	107.4	109.4	52.8	42.1	108.6	94.2		High	7.761e-05	1.593e-05	4.09
25020	TGGT1_243460	hypothetical protein	transcript=TGGT1_243460-t26_1 | gene=TGGT1_243460 | organism=Toxoplasma_gondii_GT1 | gene_product=hypothetical protein | transcript_product=hypothetical protein | location=TGGT1_chrVI:2564580-2571836(-) | protein_length=2011 | sequence_SO=chromosome | SO=protein_coding_gene | is_pseudo=false	[R].EGSDGDEEGKNELDESSEGTLEGETVVEAR.[R]	1xTMTpro [K10]; 1xTMTpro [N-Term]; 1xPhospho [S3(100)]	TGGT1_243460-t26_1-p1 1xPhospho [S1937(100)]	3	High	3.05052e-08	9.56086e-05	1	1	TGGT1_243460-t26_1-p1	TGGT1_243460-t26_1-p1 [1935-1964]	1	3855.74	1.064	0.09	1	61.6	57.9	1.54	9.85	NA	NA	62.2	60.9	NA	NA	62.1	54		High	7.761e-05	8.591e-09	4.98
55453	TGGT1_316900	Sas10 C-terminal domain-containing protein	transcript=TGGT1_316900-t26_1 | gene=TGGT1_316900 | organism=Toxoplasma_gondii_GT1 | gene_product=Sas10 domain-containing protein [Source:UniProtKB/TrEMBL;Acc:S7UL53] | transcript_product=Sas10 C-terminal domain-containing protein | location=TGGT1_chrXI:5539468-5546574(-) | protein_length=800 | sequence_SO=chromosome | SO=protein_coding_gene | is_pseudo=false	[R].LGDKGDDESDEEHER.[R]	1xTMTpro [K4]; 1xTMTpro [N-Term]; 1xPhospho [S9(100)]	TGGT1_316900-t26_1-p1 1xPhospho [S90(100)]	19	High	9.95398e-07	9.56086e-05	1	1	TGGT1_316900-t26_1-p1	TGGT1_316900-t26_1-p1 [82-96]	1	2419.09	0.927	-0.11	1	169	182.2	101.3	102.81	44.3	45.2	703.2	631.7	47.3	36	702	728.6		High	7.761e-05	3.681e-07	6.58
25002	TGGT1_254370	guanylyl cyclase	transcript=TGGT1_254370-t26_1 | gene=TGGT1_254370 | organism=Toxoplasma_gondii_GT1 | gene_product=Guanylyl cyclase [Source:UniProtKB/TrEMBL;Acc:S7VVK4] | transcript_product=guanylyl cyclase | location=TGGT1_chrIII:1634182-1672467(+) | protein_length=4367 | sequence_SO=chromosome | SO=protein_coding_gene | is_pseudo=false	[R].EGSASPQPDHAAPPSGLPQGLK.[G]	1xTMTpro [K22]; 1xTMTpro [N-Term]; 1xPhospho [S5(99.7)]	TGGT1_254370-t26_1-p1 1xPhospho [S3573(99.7)]	2	High	6.21131e-07	9.56086e-05	1	1	TGGT1_254370-t26_1-p1	TGGT1_254370-t26_1-p1 [3569-3590]	0	2829.44	1.063	0.09	1	35.8	33.7	1.03	14.05	NA	NA	35.6	36.1	NA	NA	37.3	30.5		High	7.761e-05	2.215e-07	4.65
25001	TGGT1_301400	hypothetical protein	transcript=TGGT1_301400-t26_1 | gene=TGGT1_301400 | organism=Toxoplasma_gondii_GT1 | gene_product=hypothetical protein | transcript_product=hypothetical protein | location=TGGT1_chrIV:2331185-2338663(-) | protein_length=2264 | sequence_SO=chromosome | SO=protein_coding_gene | is_pseudo=false	[R].EGSAPASQEIVEEETRPEQTK.[S]	1xTMTpro [K21]; 1xTMTpro [N-Term]; 1xPhospho [S3(100)]	TGGT1_301400-t26_1-p1 1xPhospho [S2125(100)]	1	High	2.5805e-05	9.56086e-05	1	1	TGGT1_301400-t26_1-p1	TGGT1_301400-t26_1-p1 [2123-2143]	0	3003.48	1.155	0.21	1	12.4	10.7	10.09	6.39	NA	NA	11.5	13.3	NA	NA	10.2	11.2		High	7.761e-05	1.238e-05	4.2
24901	TGGT1_286160B	non-specific serine/threonine protein kinase	transcript=TGGT1_286160B-t26_1 | gene=TGGT1_286160B | organism=Toxoplasma_gondii_GT1 | gene_product=Non-specific serine/threonine protein kinase [Source:UniProtKB/TrEMBL;Acc:S7VWL2] | transcript_product=non-specific serine/threonine protein kinase | location=TGGT1_chrV:1801786-1809593(+) | protein_length=1844 | sequence_SO=chromosome | SO=protein_coding_gene | is_pseudo=false	[R].EGQSLSPSLDPSAVR.[C]	1xTMTpro [N-Term]; 1xPhospho [S6(100)]	TGGT1_286160B-t26_1-p1 1xPhospho [S1569(100)]	1	High	1.49491e-05	9.56086e-05	1	1	TGGT1_286160B-t26_1-p1	TGGT1_286160B-t26_1-p1 [1564-1578]	0	1926.95	2.576	1.37	0.0355989	18.6	7.2	4.07	9.77	NA	NA	19.2	18.1	NA	NA	7.7	6.7		High	7.761e-05	6.862e-06	4.43
96923	TGGT1_286160B	non-specific serine/threonine protein kinase	transcript=TGGT1_286160B-t26_1 | gene=TGGT1_286160B | organism=Toxoplasma_gondii_GT1 | gene_product=Non-specific serine/threonine protein kinase [Source:UniProtKB/TrEMBL;Acc:S7VWL2] | transcript_product=non-specific serine/threonine protein kinase | location=TGGT1_chrV:1801786-1809593(+) | protein_length=1844 | sequence_SO=chromosome | SO=protein_coding_gene | is_pseudo=false	[R].SSSFAEQTGNER.[T]	1xTMTpro [N-Term]; 1xPhospho [S3(100)]	TGGT1_286160B-t26_1-p1 1xPhospho [S466(100)]	8	High	0.000114353	9.56086e-05	1	1	TGGT1_286160B-t26_1-p1	TGGT1_286160B-t26_1-p1 [464-475]	0	1696.75	0.789	-0.34	1	88.9	112.7	28.57	20.06	76.4	60.8	103.5	117.2	78.5	103.5	125.1	122.6		High	0.0001044	6.754e-05	2.51
96952	TGGT1_234230	hypothetical protein	transcript=TGGT1_234230-t26_1 | gene=TGGT1_234230 | organism=Toxoplasma_gondii_GT1 | gene_product=hypothetical protein | transcript_product=hypothetical protein | location=TGGT1_chrX:4104920-4121364(-) | protein_length=4625 | sequence_SO=chromosome | SO=protein_coding_gene | is_pseudo=false	[R].SSSFSDDEDFSVEGEGEEREPEGDAQAGR.[E]	1xTMTpro [N-Term]; 1xPhospho [S5(100)]	TGGT1_234230-t26_1-p1 1xPhospho [S3146(100)]	3	High	1.73403e-07	9.56086e-05	1	1	TGGT1_234230-t26_1-p1	TGGT1_234230-t26_1-p1 [3142-3170]	1	3502.44	1.111	0.15	1	68.7	61.8	0.75	1.34	NA	NA	68.4	69.1	NA	NA	61.3	62.4		High	7.761e-05	5.599e-08	4.31
55461	TGGT1_271290	hypothetical protein	transcript=TGGT1_271290-t26_1 | gene=TGGT1_271290 | organism=Toxoplasma_gondii_GT1 | gene_product=SURP motif domain-containing protein [Source:UniProtKB/TrEMBL;Acc:A0A125YGS9] | transcript_product=hypothetical protein | location=TGGT1_chrVIII:4582582-4591232(+) | protein_length=1116 | sequence_SO=chromosome | SO=protein_coding_gene | is_pseudo=false	[R].LGDMSAVPPPASLDAPVESESPRSPR.[M]	1xTMTpro [N-Term]; 1xPhospho [S21(99.6)]	TGGT1_271290-t26_1-p1 1xPhospho [S191(99.6)]	2	High	1.48743e-08	9.56086e-05	1	1	TGGT1_271290-t26_1-p1	TGGT1_271290-t26_1-p1 [171-196]	1	3046.49	1.274	0.35	1	34.5	27.1	11.13	1.71	NA	NA	37.3	31.9	NA	NA	27.4	26.7		High	7.761e-05	3.96e-09	5.71
96953	TGGT1_234230	hypothetical protein	transcript=TGGT1_234230-t26_1 | gene=TGGT1_234230 | organism=Toxoplasma_gondii_GT1 | gene_product=hypothetical protein | transcript_product=hypothetical protein | location=TGGT1_chrX:4104920-4121364(-) | protein_length=4625 | sequence_SO=chromosome | SO=protein_coding_gene | is_pseudo=false	[R].SSSFSDDEDFSVEGEGEEREPEGDAQAGR.[E]	1xTMTpro [N-Term]; 2xPhospho [S5(100); S11(100)]	TGGT1_234230-t26_1-p1 2xPhospho [S3146(100); S3152(100)]	7	High	9.70014e-08	9.56086e-05	1	1	TGGT1_234230-t26_1-p1	TGGT1_234230-t26_1-p1 [3142-3170]	1	3582.4	1.114	0.16	1	45.3	40.7	24.24	19.79	NA	NA	38.1	53.9	NA	NA	46.8	35.3		High	7.761e-05	2.992e-08	6.38
24953	TGGT1_304760	RNA recognition motif-containing protein	transcript=TGGT1_304760-t26_1 | gene=TGGT1_304760 | organism=Toxoplasma_gondii_GT1 | gene_product=RNA recognition motif-containing protein [Source:UniProtKB/TrEMBL;Acc:S7W2V6] | transcript_product=RNA recognition motif-containing protein | location=TGGT1_chrVIIa:667907-675253(+) | protein_length=1335 | sequence_SO=chromosome | SO=protein_coding_gene | is_pseudo=false	[K].EGRPEAPDEGSAASRDEDAEAR.[D]	1xTMTpro [N-Term]; 2xPhospho [S11(100); S14(100)]	TGGT1_304760-t26_1-p1 2xPhospho [S111(100); S114(100)]	27	High	6.6573e-05	9.56086e-05	1	1	TGGT1_304760-t26_1-p1	TGGT1_304760-t26_1-p1 [101-122]	1	2779.15	0.963	-0.06	1	257.9	268	38.29	39.46	342	394.4	194.5	181.1	403.7	362.9	181.9	197.9		High	0.0001044	3.898e-05	3.4
24952	TGGT1_304760	RNA recognition motif-containing protein	transcript=TGGT1_304760-t26_1 | gene=TGGT1_304760 | organism=Toxoplasma_gondii_GT1 | gene_product=RNA recognition motif-containing protein [Source:UniProtKB/TrEMBL;Acc:S7W2V6] | transcript_product=RNA recognition motif-containing protein | location=TGGT1_chrVIIa:667907-675253(+) | protein_length=1335 | sequence_SO=chromosome | SO=protein_coding_gene | is_pseudo=false	[K].EGRPEAPDEGSAASRDEDAEAR.[D]	1xTMTpro [N-Term]; 1xPhospho [S14(99.7)]	TGGT1_304760-t26_1-p1 1xPhospho [S114(99.7)]	10	High	2.79536e-05	9.56086e-05	1	1	TGGT1_304760-t26_1-p1	TGGT1_304760-t26_1-p1 [101-122]	1	2699.19	1.297	0.38	1	32.6	25.1	4.95	2.74	NA	NA	33.8	31.5	NA	NA	24.7	25.6		High	7.761e-05	1.35e-05	3.79
55462	TGGT1_271290	hypothetical protein	transcript=TGGT1_271290-t26_1 | gene=TGGT1_271290 | organism=Toxoplasma_gondii_GT1 | gene_product=SURP motif domain-containing protein [Source:UniProtKB/TrEMBL;Acc:A0A125YGS9] | transcript_product=hypothetical protein | location=TGGT1_chrVIII:4582582-4591232(+) | protein_length=1116 | sequence_SO=chromosome | SO=protein_coding_gene | is_pseudo=false	[R].LGDMSAVPPPASLDAPVESESPRSPR.[M]	1xOxidation [M4]; 1xTMTpro [N-Term]; 1xPhospho [S24(100)]	TGGT1_271290-t26_1-p1 1xPhospho [S194(100)]	1	High	1.45096e-08	9.56086e-05	1	1	TGGT1_271290-t26_1-p1	TGGT1_271290-t26_1-p1 [171-196]	1	3062.48	0.916	-0.13	1	22.6	24.7	15.09	9.72	NA	NA	20.3	25.2	NA	NA	26.5	23.1		High	7.761e-05	3.856e-09	6.73
24935	TGGT1_231930	hypothetical protein	transcript=TGGT1_231930-t26_1 | gene=TGGT1_231930 | organism=Toxoplasma_gondii_GT1 | gene_product=RING-type domain-containing protein [Source:UniProtKB/TrEMBL;Acc:S7V3F4] | transcript_product=hypothetical protein | location=TGGT1_chrVIII:1647608-1653496(-) | protein_length=805 | sequence_SO=chromosome | SO=protein_coding_gene | is_pseudo=false	[R].EGRETPSQEELVHLLILQQQDLPR.[D]	1xTMTpro [N-Term]; 1xPhospho [T5(99.3)]	TGGT1_231930-t26_1-p1 1xPhospho [T623(99.3)]	1	High	6.02506e-05	9.56086e-05	1	1	TGGT1_231930-t26_1-p1	TGGT1_231930-t26_1-p1 [619-642]	1	3212.66	0.864	-0.21	1	9	10.4	2.7	20.59	NA	NA	9.2	8.8	NA	NA	9	12.1		High	7.761e-05	3.124e-05	3
24928	TGGT1_254370	guanylyl cyclase	transcript=TGGT1_254370-t26_1 | gene=TGGT1_254370 | organism=Toxoplasma_gondii_GT1 | gene_product=Guanylyl cyclase [Source:UniProtKB/TrEMBL;Acc:S7VVK4] | transcript_product=guanylyl cyclase | location=TGGT1_chrIII:1634182-1672467(+) | protein_length=4367 | sequence_SO=chromosome | SO=protein_coding_gene | is_pseudo=false	[K].EGRESEVALASPETESR.[D]	1xTMTpro [N-Term]; 1xPhospho [S5(100)]	TGGT1_254370-t26_1-p1 1xPhospho [S3540(100)]	6	High	1.74126e-06	9.56086e-05	1	1	TGGT1_254370-t26_1-p1	TGGT1_254370-t26_1-p1 [3536-3552]	1	2231.05	0.778	-0.36	1	47.4	60.9	11.7	16.43	NA	NA	43.6	51.5	NA	NA	54.2	68.5		High	7.761e-05	6.738e-07	4.78
24919	TGGT1_321680	hypothetical protein	transcript=TGGT1_321680-t26_1 | gene=TGGT1_321680 | organism=Toxoplasma_gondii_GT1 | gene_product=HABP4_PAI-RBP1 domain-containing protein [Source:UniProtKB/TrEMBL;Acc:A0A125YT80] | transcript_product=hypothetical protein | location=TGGT1_chrIb:1645852-1649258(-) | protein_length=372 | sequence_SO=chromosome | SO=protein_coding_gene | is_pseudo=false	[K].EGREEEEEETASEEEDEHAEPK.[K]	1xTMTpro [K22]; 1xTMTpro [N-Term]; 2xPhospho [T10(100); S12(100)]	TGGT1_321680-t26_1-p1 2xPhospho [T289(100); S291(100)]	236	High	2.32035e-07	9.56086e-05	1	1	TGGT1_321680-t26_1-p1	TGGT1_321680-t26_1-p1 [280-301]	1	3356.39	1.065	0.09	1	2921.5	2742	41.18	42.58	4262.9	4215.5	1996.3	2024.7	4001.4	4059.2	1839.1	1878.9		High	0.0001044	1.558e-07	5.67
24918	TGGT1_321680	hypothetical protein	transcript=TGGT1_321680-t26_1 | gene=TGGT1_321680 | organism=Toxoplasma_gondii_GT1 | gene_product=HABP4_PAI-RBP1 domain-containing protein [Source:UniProtKB/TrEMBL;Acc:A0A125YT80] | transcript_product=hypothetical protein | location=TGGT1_chrIb:1645852-1649258(-) | protein_length=372 | sequence_SO=chromosome | SO=protein_coding_gene | is_pseudo=false	[K].EGREEEEEETASEEEDEHAEPK.[K]	1xTMTpro [K22]; 1xTMTpro [N-Term]; 1xPhospho [S12(100)]	TGGT1_321680-t26_1-p1 1xPhospho [S291(100)]	13	High	2.33576e-07	9.56086e-05	1	1	TGGT1_321680-t26_1-p1	TGGT1_321680-t26_1-p1 [280-301]	1	3276.42	1.032	0.04	1	509.5	493.9	4.45	1.02	NA	NA	525.8	493.7	NA	NA	490.3	497.4		High	7.761e-05	7.722e-08	5.28
24914	TGGT1_222310	hypothetical protein	transcript=TGGT1_222310-t26_1 | gene=TGGT1_222310 | organism=Toxoplasma_gondii_GT1 | gene_product=DUF1084 domain-containing protein [Source:UniProtKB/TrEMBL;Acc:S7UK95] | transcript_product=hypothetical protein | location=TGGT1_chrII:1007308-1013299(+) | protein_length=536 | sequence_SO=chromosome | SO=protein_coding_gene | is_pseudo=false	[R].EGRDSDDEDEHDGDR.[R]	1xTMTpro [N-Term]; 1xPhospho [S5(100)]	TGGT1_222310-t26_1-p1 1xPhospho [S92(100)]	21	High	4.51368e-06	9.56086e-05	1	1	TGGT1_222310-t26_1-p1	TGGT1_222310-t26_1-p1 [88-102]	1	2130.82	1.147	0.2	1	237.4	207	7.7	9.64	NA	NA	224.8	250.7	NA	NA	221.6	193.3		High	7.761e-05	1.882e-06	4.25
77553	TGGT1_258080	hypothetical protein	transcript=TGGT1_258080-t26_1 | gene=TGGT1_258080 | organism=Toxoplasma_gondii_GT1 | gene_product=hypothetical protein | transcript_product=hypothetical protein | location=TGGT1_chrVIIb:3558189-3569675(+) | protein_length=1711 | sequence_SO=chromosome | SO=protein_coding_gene | is_pseudo=false	[R].RHSSDVEEMAAASSPSEAAK.[T]	1xTMTpro [K20]; 1xTMTpro [N-Term]; 2xPhospho [S3(100); S4(100)]	TGGT1_258080-t26_1-p1 2xPhospho [S617(100); S618(100)]	12	High	1.1971e-05	9.56086e-05	1	1	TGGT1_258080-t26_1-p1	TGGT1_258080-t26_1-p1 [615-634]	1	2828.28	1.136	0.18	1	26.8	23.6	31.54	60.3	33.5	37.4	21.5	19.4	34.8	44.1	16	10.2		High	0.0001044	7.212e-06	3.59
25332	TGGT1_204540	DUF367 domain-containing protein	transcript=TGGT1_204540-t26_1 | gene=TGGT1_204540 | organism=Toxoplasma_gondii_GT1 | gene_product=DUF367 domain-containing protein [Source:UniProtKB/TrEMBL;Acc:S7UUQ0] | transcript_product=DUF367 domain-containing protein | location=TGGT1_chrVIIa:1629169-1631598(+) | protein_length=586 | sequence_SO=chromosome | SO=protein_coding_gene | is_pseudo=false	[K].EGVSPVCEEGEPSECQGTR.[A]	2xMethylthio [C7; C15]; 1xTMTpro [N-Term]; 1xPhospho [S4(100)]	TGGT1_204540-t26_1-p1 2xMethylthio [C326; C334]; 1xPhospho [S323(100)]	5	High	8.44993e-07	9.56086e-05	1	1	TGGT1_204540-t26_1-p1	TGGT1_204540-t26_1-p1 [320-338]	0	2468.98	1.011	0.02	1	23.6	23.3	16.71	21.97	25.7	18.2	26.5	21.6	28.1	27.7	18.4	19.6		High	7.761e-05	3.088e-07	4.63
77642	TGGT1_233160	hypothetical protein	transcript=TGGT1_233160-t26_1 | gene=TGGT1_233160 | organism=Toxoplasma_gondii_GT1 | gene_product=hypothetical protein | transcript_product=hypothetical protein | location=TGGT1_chrVIII:2462095-2469533(+) | protein_length=1856 | sequence_SO=chromosome | SO=protein_coding_gene | is_pseudo=false	[R].RKQSDGEDEDEESEVAVISEDNAR.[K]	1xTMTpro [K2]; 1xTMTpro [N-Term]; 1xPhospho [S4(100)]	TGGT1_233160-t26_1-p1 1xPhospho [S417(100)]	8	High	2.82284e-05	9.56086e-05	1	1	TGGT1_233160-t26_1-p1	TGGT1_233160-t26_1-p1 [414-437]	2	3395.57	0.982	-0.03	1	8.4	8.5	22.25	18.9	NA	NA	9.8	7.2	NA	NA	7.5	9.8		High	7.761e-05	1.367e-05	3.17
25346	TGGT1_225310	putative ARF1-directed GTPase-activating protein	transcript=TGGT1_225310-t26_1 | gene=TGGT1_225310 | organism=Toxoplasma_gondii_GT1 | gene_product=Arf-GAP domain-containing protein [Source:UniProtKB/TrEMBL;Acc:A0A125YW26] | transcript_product=putative ARF1-directed GTPase-activating protein | location=TGGT1_chrX:2229573-2233633(+) | protein_length=502 | sequence_SO=chromosome | SO=protein_coding_gene | is_pseudo=false	[K].EGYGSTEESPDENPQFPTLESR.[G]	1xTMTpro [N-Term]; 1xPhospho [S5(99.7)]	TGGT1_225310-t26_1-p1 1xPhospho [S468(99.7)]	5	High	1.60692e-07	9.56086e-05	1	1	TGGT1_225310-t26_1-p1	TGGT1_225310-t26_1-p1 [464-485]	0	2853.24	0.46	-1.12	0.00769393	58.4	126.8	3.6	0.53	NA	NA	56.9	59.9	NA	NA	127.3	126.3		High	7.761e-05	5.151e-08	6.12
25734	TGGT1_251630	slc30a2 protein	transcript=TGGT1_251630-t26_1 | gene=TGGT1_251630 | organism=Toxoplasma_gondii_GT1 | gene_product=Slc30a2 protein [Source:UniProtKB/TrEMBL;Acc:S7V0D3] | transcript_product=slc30a2 protein | location=TGGT1_chrXII:5421720-5427109(+) | protein_length=896 | sequence_SO=chromosome | SO=protein_coding_gene | is_pseudo=false	[R].ELASFPEVDEHWPHR.[L]	1xTMTpro [N-Term]; 1xPhospho [S4(100)]	TGGT1_251630-t26_1-p1 1xPhospho [S390(100)]	1	High	9.69933e-05	9.56086e-05	1	1	TGGT1_251630-t26_1-p1	TGGT1_251630-t26_1-p1 [387-401]	0	2233.04	0.972	-0.04	1	31.5	32.4	0.1	4.72	NA	NA	31.5	31.5	NA	NA	31.3	33.5		High	7.761e-05	5.285e-05	3.34
25730	TGGT1_214090	signal peptidase	transcript=TGGT1_214090-t26_1 | gene=TGGT1_214090 | organism=Toxoplasma_gondii_GT1 | gene_product=Signal peptidase [Source:UniProtKB/TrEMBL;Acc:S7W5I3] | transcript_product=signal peptidase | location=TGGT1_chrX:5908335-5920860(+) | protein_length=1859 | sequence_SO=chromosome | SO=protein_coding_gene | is_pseudo=false	[R].ELASAGEGGETER.[N]	1xTMTpro [N-Term]; 1xPhospho [S4(100)]	TGGT1_214090-t26_1-p1 1xPhospho [S1544(100)]	18	High	1.10609e-05	9.56086e-05	1	1	TGGT1_214090-t26_1-p1	TGGT1_214090-t26_1-p1 [1541-1553]	0	1689.77	1.333	0.41	1	176.4	132.3	45.55	27.51	271.3	261.9	113	118.8	168.1	165.8	105.6	100		High	7.761e-05	4.955e-06	4.31
54822	TGGT1_244700	NAD(+)/NADH kinase domain-containing protein	transcript=TGGT1_244700-t26_1 | gene=TGGT1_244700 | organism=Toxoplasma_gondii_GT1 | gene_product=NAD(+)/NADH kinase domain-containing protein [Source:UniProtKB/TrEMBL;Acc:S7W7F5] | transcript_product=NAD(+)/NADH kinase domain-containing protein | location=TGGT1_chrVI:3371487-3383046(+) | protein_length=2109 | sequence_SO=chromosome | SO=protein_coding_gene | is_pseudo=false	[K].LEPGSEEELQSVLSDEERR.[E]	1xTMTpro [N-Term]; 3xPhospho [S5(100); S11(100); S14(100)]	TGGT1_244700-t26_1-p1 3xPhospho [S1467(100); S1473(100); S1476(100)]	1	High	1.98602e-05	9.56086e-05	1	1	TGGT1_244700-t26_1-p1	TGGT1_244700-t26_1-p1 [1463-1481]	1	2746.16	0.871	-0.2	1	8.2	9.4	20.75	26.85	NA	NA	9.5	7	NA	NA	7.7	11.4		High	7.761e-05	9.319e-06	5.53
77824	TGGT1_238410	hypothetical protein	transcript=TGGT1_238410-t26_1 | gene=TGGT1_238410 | organism=Toxoplasma_gondii_GT1 | gene_product=hypothetical protein | transcript_product=hypothetical protein | location=TGGT1_chrVI:210000-214878(+) | protein_length=1535 | sequence_SO=chromosome | SO=protein_coding_gene | is_pseudo=false	[R].RLEMQTEREDSDQEESTTETGDGR.[A]	1xTMTpro [N-Term]; 1xPhospho [T/S]		6	High	0.000122254	9.56086e-05	1	1	TGGT1_238410-t26_1-p1	TGGT1_238410-t26_1-p1 [1419-1442]	2	3183.37	0.817	-0.29	1	7.9	9.6	22.32	23.11	NA	NA	6.7	9.2	NA	NA	11.4	8.2		High	7.761e-05	6.847e-05	2.59
77822	TGGT1_269710	hypothetical protein	transcript=TGGT1_269710-t26_1 | gene=TGGT1_269710 | organism=Toxoplasma_gondii_GT1 | gene_product=TFIIS N-terminal domain-containing protein [Source:UniProtKB/TrEMBL;Acc:S7V450] | transcript_product=hypothetical protein | location=TGGT1_chrVIII:5651928-5663264(-) | protein_length=1612 | sequence_SO=chromosome | SO=protein_coding_gene | is_pseudo=false	[R].RLEIEGTYSPTADTDEVQEVQPVPR.[K]	1xTMTpro [N-Term]; 1xPhospho [S9(100)]	TGGT1_269710-t26_1-p1 1xPhospho [S1235(100)]	6	High	1.95221e-09	9.56086e-05	1	1	TGGT1_269710-t26_1-p1	TGGT1_269710-t26_1-p1 [1227-1251]	1	3213.56	1.141	0.19	1	101.7	89.1	15.21	18.12	86	98.1	105.4	123.5	75.9	77.2	102.7	107		High	7.761e-05	4.434e-10	6.96
95778	TGGT1_205130	hypothetical protein	transcript=TGGT1_205130-t26_1 | gene=TGGT1_205130 | organism=Toxoplasma_gondii_GT1 | gene_product=VOC domain-containing protein [Source:UniProtKB/TrEMBL;Acc:S7UUX9] | transcript_product=hypothetical protein | location=TGGT1_chrVIIa:1506588-1532655(+) | protein_length=4815 | sequence_SO=chromosome | SO=protein_coding_gene | is_pseudo=false	[R].SSHSDSAFSSR.[W]	1xTMTpro [N-Term]; 1xPhospho [S4(100)]	TGGT1_205130-t26_1-p1 1xPhospho [S991(100)]	5	High	7.39733e-05	9.56086e-05	1	1	TGGT1_205130-t26_1-p1	TGGT1_205130-t26_1-p1 [988-998]	0	1551.68	0.791	-0.34	1	90.9	115	42.55	42.93	125.4	147	65.9	62.1	179	160.4	82.4	74.6		High	0.0001044	4.334e-05	4.09
54840	TGGT1_228750	calcium dependent protein kinase CDPK7	transcript=TGGT1_228750-t26_1 | gene=TGGT1_228750 | organism=Toxoplasma_gondii_GT1 | gene_product=Calcium dependent protein kinase CDPK7 [Source:UniProtKB/TrEMBL;Acc:S7UXI1] | transcript_product=calcium dependent protein kinase CDPK7 | location=TGGT1_chrX:72512-83383(-) | protein_length=2133 | sequence_SO=chromosome | SO=protein_coding_gene | is_pseudo=false	[R].LEQEASSSEGYGR.[S]	1xTMTpro [N-Term]; 1xPhospho [S8(100)]	TGGT1_228750-t26_1-p1 1xPhospho [S295(100)]	6	High	5.60858e-05	9.56086e-05	1	1	TGGT1_228750-t26_1-p1	TGGT1_228750-t26_1-p1 [288-300]	0	1796.8	1.05	0.07	1	27.7	26.4	4.88	4.13	NA	NA	28.7	26.7	NA	NA	25.6	27.2		High	7.761e-05	2.886e-05	3.55
25702	TGGT1_247690	phospholipid-translocating P-type ATPase, flippase subfamily protein	transcript=TGGT1_247690-t26_1 | gene=TGGT1_247690 | organism=Toxoplasma_gondii_GT1 | gene_product=P-type phospholipid transporter [Source:UniProtKB/TrEMBL;Acc:S7V144] | transcript_product=phospholipid-translocating P-type ATPase, flippase subfamily protein | location=TGGT1_chrXII:3422650-3436701(+) | protein_length=1860 | sequence_SO=chromosome | SO=protein_coding_gene | is_pseudo=false	[R].EIAFVATGSPK.[S]	1xTMTpro [K11]; 1xTMTpro [N-Term]; 1xPhospho [S9(100)]	TGGT1_247690-t26_1-p1 1xPhospho [S827(100)]	1	High	7.20266e-05	9.56086e-05	1	1	TGGT1_247690-t26_1-p1	TGGT1_247690-t26_1-p1 [819-829]	0	1807.99	0.905	-0.14	1	116.8	129	8.91	1.53	124.4	109.6	NA	NA	127.6	130.4	NA	NA		High	0.0001044	4.216e-05	3.85
54848	TGGT1_315690	DnaJ domain-containing protein	transcript=TGGT1_315690-t26_1 | gene=TGGT1_315690 | organism=Toxoplasma_gondii_GT1 | gene_product=J domain-containing protein [Source:UniProtKB/TrEMBL;Acc:S7UM22] | transcript_product=DnaJ domain-containing protein | location=TGGT1_chrXI:4848691-4851649(+) | protein_length=294 | sequence_SO=chromosome | SO=protein_coding_gene | is_pseudo=false	[R].LEQQAEATSK.[G]	1xTMTpro [K10]; 1xTMTpro [N-Term]; 1xPhospho [S9(100)]	TGGT1_315690-t26_1-p1 1xPhospho [S65(100)]	1	High	8.40599e-05	9.56086e-05	1	1	TGGT1_315690-t26_1-p1	TGGT1_315690-t26_1-p1 [57-66]	0	1792.93	1.133	0.18	1	18.8	16.6	19.66	12	NA	NA	21.7	16.4	NA	NA	18.1	15.3		High	7.761e-05	4.507e-05	3.57
25686	TGGT1_319620	hypothetical protein	transcript=TGGT1_319620-t26_1 | gene=TGGT1_319620 | organism=Toxoplasma_gondii_GT1 | gene_product=hypothetical protein | transcript_product=hypothetical protein | location=TGGT1_chrIV:769634-778192(+) | protein_length=878 | sequence_SO=chromosome | SO=protein_coding_gene | is_pseudo=false	[R].ELAAATEEPACPPVDDGSASDEAR.[S]	1xMethylthio [C11]; 1xTMTpro [N-Term]; 1xPhospho [S/T]	TGGT1_319620-t26_1-p1 1xMethylthio [C782]	3	High	3.04751e-05	9.56086e-05	1	1	TGGT1_319620-t26_1-p1	TGGT1_319620-t26_1-p1 [772-795]	0	2831.21	0.812	-0.3	1	52.3	64.4	105.43	99.4	258.1	191.2	14.3	11.6	195.3	220	10.8	21.3		High	7.761e-05	1.484e-05	3.9
95802	TGGT1_240870	putative beta adaptin protein	transcript=TGGT1_240870-t26_1 | gene=TGGT1_240870 | organism=Toxoplasma_gondii_GT1 | gene_product=AP complex subunit beta [Source:UniProtKB/TrEMBL;Acc:S7URG1] | transcript_product=putative beta adaptin protein | location=TGGT1_chrVI:1457492-1470206(+) | protein_length=924 | sequence_SO=chromosome | SO=protein_coding_gene | is_pseudo=false	[R].SSKESSDDLFDLSSPPEDPR.[G]	1xTMTpro [K3]; 1xTMTpro [N-Term]; 1xPhospho [S5(99.7)]	TGGT1_240870-t26_1-p1 1xPhospho [S668(99.7)]	2	High	2.41604e-06	9.56086e-05	1	1	TGGT1_240870-t26_1-p1	TGGT1_240870-t26_1-p1 [664-683]	1	2896.37	0.573	-0.8	1	143.7	250.7	29.42	20.27	187.5	184.1	108.7	112.1	286.3	318.6	210.2	219.5		High	0.0001044	1.519e-06	4.87
25676	TGGT1_304650	histidine acid phosphatase superfamily protein	transcript=TGGT1_304650-t26_1 | gene=TGGT1_304650 | organism=Toxoplasma_gondii_GT1 | gene_product=PPIP5K2_N domain-containing protein [Source:UniProtKB/TrEMBL;Acc:S7UTW0] | transcript_product=histidine acid phosphatase superfamily protein | location=TGGT1_chrVIIa:565293-584527(-) | protein_length=2917 | sequence_SO=chromosome | SO=protein_coding_gene | is_pseudo=false	[R].EKTPHGFVSLGDVPSAFPSAVSPR.[G]	1xTMTpro [K2]; 1xTMTpro [N-Term]; 2xPhospho [T3(100); S]	TGGT1_304650-t26_1-p1 2xPhospho [T1390(100); S]	2	High	0.000101681	9.56086e-05	1	1	TGGT1_304650-t26_1-p1	TGGT1_304650-t26_1-p1 [1388-1411]	1	3250.62	0.881	-0.18	1	12.5	14.2	23.03	13.35	NA	NA	10.6	14.8	NA	NA	15.6	12.9		High	7.761e-05	5.564e-05	3.43
54791	TGGT1_230940	hypothetical protein	transcript=TGGT1_230940-t26_1 | gene=TGGT1_230940 | organism=Toxoplasma_gondii_GT1 | gene_product=hypothetical protein | transcript_product=hypothetical protein | location=TGGT1_chrVIII:1112065-1119747(+) | protein_length=1523 | sequence_SO=chromosome | SO=protein_coding_gene | is_pseudo=false	[K].LENAALTSGSGASAR.[F]	1xTMTpro [N-Term]; 1xPhospho [S/T]		2	High	0.000122978	9.56086e-05	1	1	TGGT1_230940-t26_1-p1	TGGT1_230940-t26_1-p1 [866-880]	0	1788.88	0.847	-0.24	1	18.6	22	15.67	3	NA	NA	16.7	20.8	NA	NA	22.5	21.6		High	7.761e-05	6.892e-05	3.31
25671	TGGT1_214270	putative translation initiation factor IF-2	transcript=TGGT1_214270-t26_1 | gene=TGGT1_214270 | organism=Toxoplasma_gondii_GT1 | gene_product=Tr-type G domain-containing protein [Source:UniProtKB/TrEMBL;Acc:S7UR99] | transcript_product=putative translation initiation factor IF-2 | location=TGGT1_chrX:6085732-6096115(-) | protein_length=1146 | sequence_SO=chromosome | SO=protein_coding_gene | is_pseudo=false	[K].EKTETPEDAEEAESSR.[R]	1xTMTpro [K2]; 1xTMTpro [N-Term]; 1xPhospho [T5(100)]	TGGT1_214270-t26_1-p1 1xPhospho [T443(100)]	14	High	4.78246e-06	9.56086e-05	1	1	TGGT1_214270-t26_1-p1	TGGT1_214270-t26_1-p1 [439-454]	1	2496.16	0.914	-0.13	1	80.6	88.1	76.23	76.88	37.6	36.9	188.9	172.5	36.7	40.7	190.8	195		High	7.761e-05	2.001e-06	5.05
77813	TGGT1_313230	eukaryotic initiation factor-2, alpha subunit	transcript=TGGT1_313230-t26_1 | gene=TGGT1_313230 | organism=Toxoplasma_gondii_GT1 | gene_product=S1 motif domain-containing protein [Source:UniProtKB/TrEMBL;Acc:A0A125YGI2] | transcript_product=eukaryotic initiation factor-2, alpha subunit | location=TGGT1_chrXI:3161335-3165437(-) | protein_length=347 | sequence_SO=chromosome | SO=protein_coding_gene | is_pseudo=false	[K].RLEELLEEANEDDSSDDEEEEEDEGMGR.[V]	1xOxidation [M26]; 1xTMTpro [N-Term]; 2xPhospho [S14(100); S15(100)]	TGGT1_313230-t26_1-p1 2xPhospho [S311(100); S312(100)]	5	High	3.26795e-10	9.56086e-05	1	1	TGGT1_313230-t26_1-p1	TGGT1_313230-t26_1-p1 [298-325]	1	3749.44	1.297	0.37	1	43.1	33.3	2.04	13.76	NA	NA	42.5	43.7	NA	NA	36.7	30.2		High	7.761e-05	6.456e-11	6.41
95883	TGGT1_228080	dihydrouridine synthase (dus) protein	transcript=TGGT1_228080-t26_1 | gene=TGGT1_228080 | organism=Toxoplasma_gondii_GT1 | gene_product=tRNA-dihydrouridine(47) synthase [NAD(P)(+)] [Source:UniProtKB/TrEMBL;Acc:S7W5V4] | transcript_product=dihydrouridine synthase (dus) protein | location=TGGT1_chrX:504526-514341(+) | protein_length=1220 | sequence_SO=chromosome | SO=protein_coding_gene | is_pseudo=false	[R].SSIGLPGERPSSSVSEAPAVAHAETQQR.[A]	1xTMTpro [N-Term]; 1xPhospho [S/T]		1	High	3.1515e-07	9.56086e-05	1	1	TGGT1_228080-t26_1-p1	TGGT1_228080-t26_1-p1 [71-98]	0	3232.59	1.392	0.48	1	18.8	13.5	3.32	44.5	NA	NA	18.4	19.3	NA	NA	18.7	9.8		High	7.761e-05	1.066e-07	5.33
25657	TGGT1_253700	transporter, major facilitator family protein	transcript=TGGT1_253700-t26_1 | gene=TGGT1_253700 | organism=Toxoplasma_gondii_GT1 | gene_product=MFS domain-containing protein [Source:UniProtKB/TrEMBL;Acc:S7UMU8] | transcript_product=transporter, major facilitator family protein | location=TGGT1_chrIII:1085722-1092339(-) | protein_length=1302 | sequence_SO=chromosome | SO=protein_coding_gene | is_pseudo=false	[R].EKSSIKNEIEVGGVHEEE.[-]	2xTMTpro [K2; K6]; 1xTMTpro [N-Term]; 1xPhospho [S]		1	High	0.000103391	9.56086e-05	1	1	TGGT1_253700-t26_1-p1	TGGT1_253700-t26_1-p1 [1285-1302]	2	3005.56	0.562	-0.83	0.977381	74.4	132.3	6.32	10.85	NA	NA	77.8	71.2	NA	NA	122.5	142.9		High	7.761e-05	5.668e-05	3.93
77812	TGGT1_313230	eukaryotic initiation factor-2, alpha subunit	transcript=TGGT1_313230-t26_1 | gene=TGGT1_313230 | organism=Toxoplasma_gondii_GT1 | gene_product=S1 motif domain-containing protein [Source:UniProtKB/TrEMBL;Acc:A0A125YGI2] | transcript_product=eukaryotic initiation factor-2, alpha subunit | location=TGGT1_chrXI:3161335-3165437(-) | protein_length=347 | sequence_SO=chromosome | SO=protein_coding_gene | is_pseudo=false	[K].RLEELLEEANEDDSSDDEEEEEDEGMGR.[V]	1xTMTpro [N-Term]; 2xPhospho [S14(100); S15(100)]	TGGT1_313230-t26_1-p1 2xPhospho [S311(100); S312(100)]	4	High	1.18883e-10	9.56086e-05	1	1	TGGT1_313230-t26_1-p1	TGGT1_313230-t26_1-p1 [298-325]	1	3733.44	1.1	0.14	1	81.3	73.9	4.58	6.17	NA	NA	83.9	78.7	NA	NA	70.7	77.2		High	7.761e-05	2.169e-11	7.78
95891	TGGT1_285650	hypothetical protein	transcript=TGGT1_285650-t26_1 | gene=TGGT1_285650 | organism=Toxoplasma_gondii_GT1 | gene_product=hypothetical protein | transcript_product=hypothetical protein | location=TGGT1_chrV:2175312-2182741(-) | protein_length=2263 | sequence_SO=chromosome | SO=protein_coding_gene | is_pseudo=false	[R].SSLGSSGGSQPLASR.[D]	1xTMTpro [N-Term]; 1xPhospho [S5(99.6)]	TGGT1_285650-t26_1-p1 1xPhospho [S1227(99.6)]	2	High	6.40944e-05	9.56086e-05	1	1	TGGT1_285650-t26_1-p1	TGGT1_285650-t26_1-p1 [1223-1237]	0	1774.87	1.073	0.1	1	47.9	44.6	3.14	5.97	NA	NA	46.8	49	NA	NA	46.5	42.8		High	7.761e-05	3.342e-05	3.81
25621	TGGT1_271370	hypothetical protein	transcript=TGGT1_271370-t26_1 | gene=TGGT1_271370 | organism=Toxoplasma_gondii_GT1 | gene_product=hypothetical protein | transcript_product=hypothetical protein | location=TGGT1_chrVIII:4530840-4541438(-) | protein_length=3532 | sequence_SO=chromosome | SO=protein_coding_gene | is_pseudo=false	[R].EKPSASGTESPDAQAALDSGVHTR.[D]	1xTMTpro [K2]; 1xTMTpro [N-Term]; 1xPhospho [S10(99.6)]	TGGT1_271370-t26_1-p1 1xPhospho [S100(99.6)]	2	High	6.31225e-06	9.56086e-05	1	1	TGGT1_271370-t26_1-p1	TGGT1_271370-t26_1-p1 [91-114]	0	3099.52	1.161	0.21	1	34.6	29.8	9.4	11.48	NA	NA	32.4	37	NA	NA	32.4	27.5		High	7.761e-05	2.702e-06	4.13
95912	TGGT1_320020	transporter, major facilitator family protein	transcript=TGGT1_320020-t26_1 | gene=TGGT1_320020 | organism=Toxoplasma_gondii_GT1 | gene_product=Transporter, major facilitator family protein [Source:UniProtKB/TrEMBL;Acc:S7UJG3] | transcript_product=transporter, major facilitator family protein | location=TGGT1_chrIV:518139-519905(-) | protein_length=588 | sequence_SO=chromosome | SO=protein_coding_gene | is_pseudo=false	[R].SSLLDVSGKEPADEDPRAPSPEVAV.[-]	1xTMTpro [K9]; 1xTMTpro [N-Term]; 1xPhospho [S20(100)]	TGGT1_320020-t26_1-p1 1xPhospho [S583(100)]	3	High	5.16136e-05	9.56086e-05	1	1	TGGT1_320020-t26_1-p1	TGGT1_320020-t26_1-p1 [564-588]	2	3253.65	0.944	-0.08	1	186.7	197.9	49.43	40.42	281.7	287.8	123.8	105.1	285	283.7	138	135.8		High	0.0001044	3.026e-05	2.91
54904	TGGT1_222220	alveolin domain containing intermediate filament IMC7	transcript=TGGT1_222220-t26_1 | gene=TGGT1_222220 | organism=Toxoplasma_gondii_GT1 | gene_product=Alveolin domain containing intermediate filament IMC7 [Source:UniProtKB/TrEMBL;Acc:A0A125YVP0] | transcript_product=alveolin domain containing intermediate filament IMC7 | location=TGGT1_chrII:949239-952716(+) | protein_length=429 | sequence_SO=chromosome | SO=protein_coding_gene | is_pseudo=false	[R].LESFPSGNAGIPMIFR.[A]	1xOxidation [M13]; 1xTMTpro [N-Term]; 1xPhospho [S6(100)]	TGGT1_222220-t26_1-p1 1xPhospho [S358(100)]	1	High	0.000123159	9.56086e-05	1	1	TGGT1_222220-t26_1-p1	TGGT1_222220-t26_1-p1 [353-368]	0	2136.05	0.998	0	1	36.3	36.4	21.93	11.83	NA	NA	31	42.4	NA	NA	39.6	33.5		High	7.761e-05	6.894e-05	3.44
25604	TGGT1_271100	NUC153 domain-containing protein	transcript=TGGT1_271100-t26_1 | gene=TGGT1_271100 | organism=Toxoplasma_gondii_GT1 | gene_product=NUC153 domain-containing protein [Source:UniProtKB/TrEMBL;Acc:S7V455] | transcript_product=NUC153 domain-containing protein | location=TGGT1_chrVIII:4713202-4723704(+) | protein_length=999 | sequence_SO=chromosome | SO=protein_coding_gene | is_pseudo=false	[K].EKGESDAEGFDDSTDDDEIKPTDEEELR.[Y]	2xTMTpro [K2; K20]; 1xTMTpro [N-Term]; 3xPhospho [S5(100); S13(100); T14(100)]	TGGT1_271100-t26_1-p1 3xPhospho [S462(100); S470(100); T471(100)]	1	High	1.50286e-06	9.56086e-05	1	1	TGGT1_271100-t26_1-p1	TGGT1_271100-t26_1-p1 [458-485]	1	4323.84	0.867	-0.21	1	54	62.2	16.71	8.53	60.8	47.9	NA	NA	58.6	66.1	NA	NA		High	0.0001044	9.566e-07	4.09
25602	TGGT1_314240	general transcription factor IIIC polypeptide 3 GTF3C3	transcript=TGGT1_314240-t26_1 | gene=TGGT1_314240 | organism=Toxoplasma_gondii_GT1 | gene_product=General transcription factor IIIC polypeptide 3 GTF3C3 [Source:UniProtKB/TrEMBL;Acc:S7UTH3] | transcript_product=general transcription factor IIIC polypeptide 3 GTF3C3 | location=TGGT1_chrXI:3908440-3923379(+) | protein_length=1484 | sequence_SO=chromosome | SO=protein_coding_gene | is_pseudo=false	[K].EKGDSEDEPDVHSGGDR.[G]	1xTMTpro [K2]; 1xTMTpro [N-Term]; 2xPhospho [S5(100); S13(100)]	TGGT1_314240-t26_1-p1 2xPhospho [S368(100); S376(100)]	5	High	7.43311e-06	9.56086e-05	1	1	TGGT1_314240-t26_1-p1	TGGT1_314240-t26_1-p1 [364-380]	1	2597.1	1.171	0.23	1	34.5	29.5	5.77	11.19	35.9	33.1	NA	NA	31.9	27.2	NA	NA		High	0.0001044	4.53e-06	4.59
25601	TGGT1_314240	general transcription factor IIIC polypeptide 3 GTF3C3	transcript=TGGT1_314240-t26_1 | gene=TGGT1_314240 | organism=Toxoplasma_gondii_GT1 | gene_product=General transcription factor IIIC polypeptide 3 GTF3C3 [Source:UniProtKB/TrEMBL;Acc:S7UTH3] | transcript_product=general transcription factor IIIC polypeptide 3 GTF3C3 | location=TGGT1_chrXI:3908440-3923379(+) | protein_length=1484 | sequence_SO=chromosome | SO=protein_coding_gene | is_pseudo=false	[K].EKGDSEDEPDVHSGGDR.[G]	1xTMTpro [K2]; 1xTMTpro [N-Term]; 1xPhospho [S5(100)]	TGGT1_314240-t26_1-p1 1xPhospho [S368(100)]	7	High	1.60439e-05	9.56086e-05	1	1	TGGT1_314240-t26_1-p1	TGGT1_314240-t26_1-p1 [364-380]	1	2517.14	1.071	0.1	1	117.9	110.1	4.73	6.34	NA	NA	121.9	114	NA	NA	105.3	115.2		High	7.761e-05	7.405e-06	4.29
77800	TGGT1_256980	glycerol-3-phosphate-acyltransferase	transcript=TGGT1_256980-t26_1 | gene=TGGT1_256980 | organism=Toxoplasma_gondii_GT1 | gene_product=PlsC domain-containing protein [Source:UniProtKB/TrEMBL;Acc:S7UZ60] | transcript_product=glycerol-3-phosphate-acyltransferase | location=TGGT1_chrVIIb:4232332-4243743(-) | protein_length=1002 | sequence_SO=chromosome | SO=protein_coding_gene | is_pseudo=false	[R].RLDSSPLPTAAAPGGR.[T]	1xTMTpro [N-Term]; 1xPhospho [S4(100)]	TGGT1_256980-t26_1-p1 1xPhospho [S340(100)]	16	High	9.79063e-07	9.56086e-05	1	1	TGGT1_256980-t26_1-p1	TGGT1_256980-t26_1-p1 [337-352]	1	1950.01	0.716	-0.48	1	177.4	247.6	30.22	36.56	202.3	269.2	140.2	155.5	352.8	338.5	181.1	178.3		High	7.761e-05	3.617e-07	5.9
77798	TGGT1_218070	hypothetical protein	transcript=TGGT1_218070-t26_1 | gene=TGGT1_218070 | organism=Toxoplasma_gondii_GT1 | gene_product=NOC3p domain-containing protein [Source:UniProtKB/TrEMBL;Acc:S7V1Z3] | transcript_product=hypothetical protein | location=TGGT1_chrXII:1669273-1677304(-) | protein_length=1742 | sequence_SO=chromosome | SO=protein_coding_gene | is_pseudo=false	[R].RLDSGSDASAVGR.[L]	1xTMTpro [N-Term]; 1xPhospho [S4(100)]	TGGT1_218070-t26_1-p1 1xPhospho [S268(100)]	2	High	0.000137204	9.56086e-05	1	1	TGGT1_218070-t26_1-p1	TGGT1_218070-t26_1-p1 [265-277]	1	1674.81	0.779	-0.36	1	55.4	71.1	20.29	23.23	64	47.9	NA	NA	60.2	83.9	NA	NA		High	0.0001044	8.181e-05	3.32
95823	TGGT1_243800	putative long-chain fatty acid CoA ligase	transcript=TGGT1_243800-t26_1 | gene=TGGT1_243800 | organism=Toxoplasma_gondii_GT1 | gene_product=AMP-binding domain-containing protein [Source:UniProtKB/TrEMBL;Acc:S7VU20] | transcript_product=putative long-chain fatty acid CoA ligase | location=TGGT1_chrVI:2778396-2788707(-) | protein_length=758 | sequence_SO=chromosome | SO=protein_coding_gene | is_pseudo=false	[K].SSLAGEPEEAVNASRVTPETSEDAAEQTTEGAGK.[E]	1xTMTpro [K34]; 1xTMTpro [N-Term]; 1xPhospho [T17(100)]	TGGT1_243800-t26_1-p1 1xPhospho [T208(100)]	1	High	7.98766e-07	9.56086e-05	1	1	TGGT1_243800-t26_1-p1	TGGT1_243800-t26_1-p1 [192-225]	1	4106.95	0.928	-0.11	1	50.6	54.5	14.44	8.32	NA	NA	45.6	56	NA	NA	57.8	51.4		High	7.761e-05	2.903e-07	4.75
77790	TGGT1_247040	hypothetical protein	transcript=TGGT1_247040-t26_1 | gene=TGGT1_247040 | organism=Toxoplasma_gondii_GT1 | gene_product=hypothetical protein | transcript_product=hypothetical protein | location=TGGT1_chrXII:3051933-3058222(-) | protein_length=1140 | sequence_SO=chromosome | SO=protein_coding_gene | is_pseudo=false	[R].RLDLPASPEVSSPLK.[K]	1xTMTpro [K15]; 1xTMTpro [N-Term]; 1xPhospho [S12(100)]	TGGT1_247040-t26_1-p1 1xPhospho [S29(100)]	2	High	3.26835e-07	9.56086e-05	1	1	TGGT1_247040-t26_1-p1	TGGT1_247040-t26_1-p1 [18-32]	1	2297.28	0.901	-0.15	1	205.9	228.6	2.53	0.03	NA	NA	202.3	209.7	NA	NA	228.6	228.5		High	7.761e-05	1.109e-07	5.49
77832	TGGT1_258680	TATA-box binding protein TBP2	transcript=TGGT1_258680-t26_1 | gene=TGGT1_258680 | organism=Toxoplasma_gondii_GT1 | gene_product=TATA-box binding protein TBP2 [Source:UniProtKB/TrEMBL;Acc:S7UZ25] | transcript_product=TATA-box binding protein TBP2 | location=TGGT1_chrVIIb:3227470-3230255(+) | protein_length=549 | sequence_SO=chromosome | SO=protein_coding_gene | is_pseudo=false	[R].RLESEEDLDNSAAVQAR.[E]	1xTMTpro [N-Term]; 1xPhospho [S4(100)]	TGGT1_258680-t26_1-p1 1xPhospho [S93(100)]	8	High	3.0204e-06	9.56086e-05	1	1	TGGT1_258680-t26_1-p1	TGGT1_258680-t26_1-p1 [90-106]	1	2287.09	0.811	-0.3	1	46.7	57.5	5.93	6.31	NA	NA	48.7	44.8	NA	NA	60.2	55		High	7.761e-05	1.22e-06	4.3
25773	TGGT1_310330	hypothetical protein	transcript=TGGT1_310330-t26_1 | gene=TGGT1_310330 | organism=Toxoplasma_gondii_GT1 | gene_product=hypothetical protein | transcript_product=hypothetical protein | location=TGGT1_chrXI:1227355-1230872(-) | protein_length=645 | sequence_SO=chromosome | SO=protein_coding_gene | is_pseudo=false	[K].ELDDSADEMEATETGVK.[T]	1xOxidation [M9]; 1xTMTpro [K17]; 1xTMTpro [N-Term]; 1xPhospho [S5(100)]	TGGT1_310330-t26_1-p1 1xPhospho [S575(100)]	4	High	1.21001e-06	9.56086e-05	1	1	TGGT1_310330-t26_1-p1	TGGT1_310330-t26_1-p1 [571-587]	0	2544.16	0.95	-0.07	1	208.3	219.2	8.43	4.77	221.1	196.3	NA	NA	226.8	212	NA	NA		High	0.0001044	7.759e-07	5.64
95631	TGGT1_242570	hypothetical protein	transcript=TGGT1_242570-t26_1 | gene=TGGT1_242570 | organism=Toxoplasma_gondii_GT1 | gene_product=hypothetical protein | transcript_product=hypothetical protein | location=TGGT1_chrVI:1981264-1985802(-) | protein_length=884 | sequence_SO=chromosome | SO=protein_coding_gene | is_pseudo=false	[R].SSGSGETIPSSQDPESPR.[Q]	1xTMTpro [N-Term]; 1xPhospho [S4(100)]	TGGT1_242570-t26_1-p1 1xPhospho [S130(100)]	4	High	2.15207e-05	9.56086e-05	1	1	TGGT1_242570-t26_1-p1	TGGT1_242570-t26_1-p1 [127-144]	0	2201.99	0.816	-0.29	1	35.1	43.1	15.51	2.07	NA	NA	39.2	31.5	NA	NA	43.7	42.4		High	7.761e-05	1.018e-05	3.84
54672	TGGT1_205558	NAC domain-containing protein	transcript=TGGT1_205558-t26_1 | gene=TGGT1_205558 | organism=Toxoplasma_gondii_GT1 | gene_product=NAC-A/B domain-containing protein [Source:UniProtKB/TrEMBL;Acc:S7W330] | transcript_product=NAC domain-containing protein | location=TGGT1_chrVIIa:1246583-1248351(+) | protein_length=189 | sequence_SO=chromosome | SO=protein_coding_gene | is_pseudo=false	[K].LEEVNQEEDAGTPEGR.[S]	1xTMTpro [N-Term]; 1xPhospho [T12(100)]	TGGT1_205558-t26_1-p1 1xPhospho [T37(100)]	35	High	2.20796e-07	9.56086e-05	1	1	TGGT1_205558-t26_1-p1	TGGT1_205558-t26_1-p1 [26-41]	0	2156.97	1.12	0.16	1	195.7	174.7	10.71	9.35	168.8	216	186.8	205.2	151.4	185	184	166		High	7.761e-05	1.235e-07	6.38
95635	TGGT1_209880	putative glutamic acid-rcih protein	transcript=TGGT1_209880-t26_1 | gene=TGGT1_209880 | organism=Toxoplasma_gondii_GT1 | gene_product=Putative glutamic acid-rcih protein [Source:UniProtKB/TrEMBL;Acc:S7UJC0] | transcript_product=putative glutamic acid-rcih protein | location=TGGT1_chrIb:1523777-1548230(+) | protein_length=4892 | sequence_SO=chromosome | SO=protein_coding_gene | is_pseudo=false	[R].SSGSGREEVTTEAGQR.[E]	1xTMTpro [N-Term]; 1xPhospho [S4(99.6)]	TGGT1_209880-t26_1-p1 1xPhospho [S4683(99.6)]	9	High	5.85507e-05	9.56086e-05	1	1	TGGT1_209880-t26_1-p1	TGGT1_209880-t26_1-p1 [4680-4695]	1	2034.94	1.09	0.12	1	147.5	135.3	39.47	38.6	110.9	89.7	196.1	208.5	103.5	87.5	176.8	199.8		High	7.761e-05	3.026e-05	3.93
95647	TGGT1_306190	hypothetical protein	transcript=TGGT1_306190-t26_1 | gene=TGGT1_306190 | organism=Toxoplasma_gondii_GT1 | gene_product=hypothetical protein | transcript_product=hypothetical protein | location=TGGT1_chrIX:5600255-5603264(+) | protein_length=469 | sequence_SO=chromosome | SO=protein_coding_gene | is_pseudo=false	[R].SSGSLSTSVFRPSSASTAPATPAK.[D]	1xTMTpro [K24]; 1xTMTpro [N-Term]; 1xPhospho [S/T]		1	High	9.24975e-05	9.56086e-05	1	1	TGGT1_306190-t26_1-p1	TGGT1_306190-t26_1-p1 [239-262]	0	2982.54	0.89	-0.17	1	75.7	85.1	11.85	0.85	NA	NA	69.6	82.3	NA	NA	85.6	84.6		High	7.761e-05	5.006e-05	3.85
54707	TGGT1_257510	CDP-alcohol phosphatidyltransferase superfamily protein	transcript=TGGT1_257510-t26_1 | gene=TGGT1_257510 | organism=Toxoplasma_gondii_GT1 | gene_product=CDP-alcohol phosphatidyltransferase superfamily protein [Source:UniProtKB/TrEMBL;Acc:S7UZF3] | transcript_product=CDP-alcohol phosphatidyltransferase superfamily protein | location=TGGT1_chrVIIb:3934837-3940733(-) | protein_length=467 | sequence_SO=chromosome | SO=protein_coding_gene | is_pseudo=false	[K].LEGLQGDSPVAAR.[G]	1xTMTpro [N-Term]; 1xPhospho [S8(100)]	TGGT1_257510-t26_1-p1 1xPhospho [S434(100)]	5	High	1.66071e-05	9.56086e-05	1	1	TGGT1_257510-t26_1-p1	TGGT1_257510-t26_1-p1 [427-439]	0	1696.86	0.982	-0.03	1	140	142.6	30.92	18.38	90.3	115.9	169.1	180.6	114.9	124.8	166.2	162.9		High	7.761e-05	7.68e-06	4.51
54709	TGGT1_208400B	hypothetical protein	transcript=TGGT1_208400B-t26_1 | gene=TGGT1_208400B | organism=Toxoplasma_gondii_GT1 | gene_product=hypothetical protein | transcript_product=hypothetical protein | location=TGGT1_chrIb:671628-681222(-) | protein_length=1824 | sequence_SO=chromosome | SO=protein_coding_gene | is_pseudo=false	[R].LEGLTSQASLR.[R]	1xTMTpro [N-Term]; 1xPhospho [S9(100)]	TGGT1_208400B-t26_1-p1 1xPhospho [S1491(100)]	1	High	0.000112656	9.56086e-05	1	1	TGGT1_208400B-t26_1-p1	TGGT1_208400B-t26_1-p1 [1483-1493]	0	1558.82	0.637	-0.65	1	20.2	31.6	20.86	21.81	23.4	17.4	NA	NA	36.9	27.1	NA	NA		High	0.0001044	6.653e-05	3.71
95678	TGGT1_224260	PHD-finger domain-containing protein	transcript=TGGT1_224260-t26_1 | gene=TGGT1_224260 | organism=Toxoplasma_gondii_GT1 | gene_product=PHD-finger domain-containing protein [Source:UniProtKB/TrEMBL;Acc:S7WBT2] | transcript_product=PHD-finger domain-containing protein | location=TGGT1_chrX:3059832-3081619(-) | protein_length=5658 | sequence_SO=chromosome | SO=protein_coding_gene | is_pseudo=false	[R].SSGTGAPVSPQPR.[S]	1xTMTpro [N-Term]; 1xPhospho [S9(100)]	TGGT1_224260-t26_1-p1 1xPhospho [S1148(100)]	5	High	0.000100147	9.56086e-05	1	1	TGGT1_224260-t26_1-p1	TGGT1_224260-t26_1-p1 [1140-1152]	0	1624.8	1.4	0.49	1	25.5	18.2	35.06	51.01	18.2	23.1	40.7	28.2	7.2	15	22.1	29.1		High	7.761e-05	5.472e-05	3.38
25772	TGGT1_310330	hypothetical protein	transcript=TGGT1_310330-t26_1 | gene=TGGT1_310330 | organism=Toxoplasma_gondii_GT1 | gene_product=hypothetical protein | transcript_product=hypothetical protein | location=TGGT1_chrXI:1227355-1230872(-) | protein_length=645 | sequence_SO=chromosome | SO=protein_coding_gene | is_pseudo=false	[K].ELDDSADEMEATETGVK.[T]	1xTMTpro [K17]; 1xTMTpro [N-Term]; 1xPhospho [S5(100)]	TGGT1_310330-t26_1-p1 1xPhospho [S575(100)]	5	High	3.86935e-07	9.56086e-05	1	1	TGGT1_310330-t26_1-p1	TGGT1_310330-t26_1-p1 [571-587]	0	2528.16	0.972	-0.04	1	105.9	108.9	92.15	88.07	348.9	291.4	36.7	38.5	290.3	278.1	34.1	42.7		High	0.0001044	2.561e-07	6.13
95687	TGGT1_218730	hypothetical protein	transcript=TGGT1_218730-t26_1 | gene=TGGT1_218730 | organism=Toxoplasma_gondii_GT1 | gene_product=hypothetical protein | transcript_product=hypothetical protein | location=TGGT1_chrXII:1285339-1286622(+) | protein_length=256 | sequence_SO=chromosome | SO=protein_coding_gene | is_pseudo=false	[R].SSGTQQVAAGGQTTR.[N]	1xTMTpro [N-Term]; 1xPhospho [S/T]		4	High	4.18775e-05	9.56086e-05	1	1	TGGT1_218730-t26_1-p1	TGGT1_218730-t26_1-p1 [191-205]	0	1832.88	0.687	-0.54	1	14.3	20.8	13.22	14.47	NA	NA	15.7	13	NA	NA	18.8	23.1		High	0.0001044	2.46e-05	3.56
25826	TGGT1_305140	phospholipase, patatin family protein	transcript=TGGT1_305140-t26_1 | gene=TGGT1_305140 | organism=Toxoplasma_gondii_GT1 | gene_product=PNPLA domain-containing protein [Source:UniProtKB/TrEMBL;Acc:S7UI90] | transcript_product=phospholipase, patatin family protein | location=TGGT1_chrIX:5010164-5021415(+) | protein_length=2574 | sequence_SO=chromosome | SO=protein_coding_gene | is_pseudo=false	[R].ELEEGKPSSPPSSSSAAR.[A]	1xTMTpro [K6]; 1xTMTpro [N-Term]; 1xPhospho [S9(99.6)]	TGGT1_305140-t26_1-p1 1xPhospho [S2189(99.6)]	5	High	8.1744e-05	9.56086e-05	1	1	TGGT1_305140-t26_1-p1	TGGT1_305140-t26_1-p1 [2181-2198]	0	2504.25	0.846	-0.24	1	103.3	122	16.11	6.37	NA	NA	115.8	92.1	NA	NA	116.7	127.7		High	7.761e-05	4.368e-05	3.26
25825	TGGT1_223630	hypothetical protein	transcript=TGGT1_223630-t26_1 | gene=TGGT1_223630 | organism=Toxoplasma_gondii_GT1 | gene_product=hypothetical protein | transcript_product=hypothetical protein | location=TGGT1_chrX:3594320-3595949(-) | protein_length=476 | sequence_SO=chromosome | SO=protein_coding_gene | is_pseudo=false	[K].ELEEGGDFYDSSADEEDEK.[W]	1xTMTpro [K19]; 1xTMTpro [N-Term]; 2xPhospho [S11(100); S12(100)]	TGGT1_223630-t26_1-p1 2xPhospho [S269(100); S270(100)]	2	High	1.02873e-05	9.56086e-05	1	1	TGGT1_223630-t26_1-p1	TGGT1_223630-t26_1-p1 [259-277]	0	2932.18	1.149	0.2	1	30.2	26.3	32.45	43.95	23.9	38.2	NA	NA	36.3	19.1	NA	NA		High	0.0001044	6.224e-06	3.25
77849	TGGT1_262990	hypothetical protein	transcript=TGGT1_262990-t26_1 | gene=TGGT1_262990 | organism=Toxoplasma_gondii_GT1 | gene_product=hypothetical protein | transcript_product=hypothetical protein | location=TGGT1_chrVIIb:851355-857400(-) | protein_length=1634 | sequence_SO=chromosome | SO=protein_coding_gene | is_pseudo=false	[R].RLETGSQGEQDSSER.[A]	1xTMTpro [N-Term]; 1xPhospho [S6(100)]	TGGT1_262990-t26_1-p1 1xPhospho [S1315(100)]	9	High	5.32919e-05	9.56086e-05	1	1	TGGT1_262990-t26_1-p1	TGGT1_262990-t26_1-p1 [1310-1324]	1	2062.94	0.996	-0.01	1	169.4	170	14.49	19.8	141.2	158.9	180.6	197.3	145.3	148.5	194.7	216		High	0.0001044	3.124e-05	3.38
54732	TGGT1_251840	hypothetical protein	transcript=TGGT1_251840-t26_1 | gene=TGGT1_251840 | organism=Toxoplasma_gondii_GT1 | gene_product=hypothetical protein | transcript_product=hypothetical protein | location=TGGT1_chrXII:5528592-5531006(+) | protein_length=477 | sequence_SO=chromosome | SO=protein_coding_gene | is_pseudo=false	[K].IEGTQTENTSEGGEAQK.[E]	1xTMTpro [K17]; 1xTMTpro [N-Term]; 1xPhospho [S10(99.6)]	TGGT1_251840-t26_1-p1 1xPhospho [S64(99.6)]	4	High	2.74564e-05	9.56086e-05	1	1	TGGT1_251840-t26_1-p1	TGGT1_251840-t26_1-p1 [55-71]	0	2467.18	0.839	-0.25	1	25.2	30	22.72	25.43	32.1	26.4	18.3	24	34.6	32.7	18.5	27.6		High	7.761e-05	1.324e-05	3.27
54739	TGGT1_250820	hypothetical protein	transcript=TGGT1_250820-t26_1 | gene=TGGT1_250820 | organism=Toxoplasma_gondii_GT1 | gene_product=hypothetical protein | transcript_product=hypothetical protein | location=TGGT1_chrXII:5170586-5175102(+) | protein_length=1156 | sequence_SO=chromosome | SO=protein_coding_gene | is_pseudo=false	[K].LEHASMDGQQGELSR.[A]	1xTMTpro [N-Term]; 1xPhospho [S5(100)]	TGGT1_250820-t26_1-p1 1xPhospho [S107(100)]	5	High	5.76261e-05	9.56086e-05	1	1	TGGT1_250820-t26_1-p1	TGGT1_250820-t26_1-p1 [103-117]	0	2041.93	1.044	0.06	1	25.1	24	9.66	17.58	NA	NA	26.9	23.4	NA	NA	21.2	27.3		High	0.0001044	3.375e-05	2.86
54740	TGGT1_250820	hypothetical protein	transcript=TGGT1_250820-t26_1 | gene=TGGT1_250820 | organism=Toxoplasma_gondii_GT1 | gene_product=hypothetical protein | transcript_product=hypothetical protein | location=TGGT1_chrXII:5170586-5175102(+) | protein_length=1156 | sequence_SO=chromosome | SO=protein_coding_gene | is_pseudo=false	[K].LEHASMDGQQGELSR.[A]	1xOxidation [M6]; 1xTMTpro [N-Term]; 1xPhospho [S5(100)]	TGGT1_250820-t26_1-p1 1xPhospho [S107(100)]	4	High	0.000122616	9.56086e-05	1	1	TGGT1_250820-t26_1-p1	TGGT1_250820-t26_1-p1 [103-117]	0	2057.93	1.179	0.24	1	16.9	14.3	80.77	90.37	36.7	43.2	6.7	7.8	46.6	22.9	9	4.9		High	7.761e-05	6.87e-05	2.59
95721	TGGT1_253910	hypothetical protein	transcript=TGGT1_253910-t26_1 | gene=TGGT1_253910 | organism=Toxoplasma_gondii_GT1 | gene_product=hypothetical protein | transcript_product=hypothetical protein | location=TGGT1_chrIII:1276732-1279395(-) | protein_length=887 | sequence_SO=chromosome | SO=protein_coding_gene | is_pseudo=false	[R].SSHADEPVANK.[G]	1xTMTpro [K11]; 1xTMTpro [N-Term]; 1xPhospho [S]		5	High	6.37907e-05	9.56086e-05	1	1	TGGT1_253910-t26_1-p1	TGGT1_253910-t26_1-p1 [385-395]	0	1842.92	1.444	0.53	1	125	86.6	17.13	16.08	134	141.4	94.5	116.6	101.8	95.5	78.5	72.1		High	0.0001044	3.734e-05	3.37
54745	TGGT1_286790	nuclear factor NF2	transcript=TGGT1_286790-t26_1 | gene=TGGT1_286790 | organism=Toxoplasma_gondii_GT1 | gene_product=Pinin_SDK_memA domain-containing protein [Source:UniProtKB/TrEMBL;Acc:A0A125YP28] | transcript_product=nuclear factor NF2 | location=TGGT1_chrV:1521521-1525782(+) | protein_length=313 | sequence_SO=chromosome | SO=protein_coding_gene | is_pseudo=false	[K].IEHIEETDYTYRPQGSAAGR.[E]	1xTMTpro [N-Term]; 1xPhospho [S16(99.6)]	TGGT1_286790-t26_1-p1 1xPhospho [S253(99.6)]	7	High	6.34884e-05	9.56086e-05	1	1	TGGT1_286790-t26_1-p1	TGGT1_286790-t26_1-p1 [238-257]	0	2677.26	0.715	-0.48	0.79962	107.1	149.9	8.24	4.7	NA	NA	101.1	113.6	NA	NA	154.9	145		High	7.761e-05	3.307e-05	4.2
77840	TGGT1_219600	hypothetical protein	transcript=TGGT1_219600-t26_1 | gene=TGGT1_219600 | organism=Toxoplasma_gondii_GT1 | gene_product=hypothetical protein | transcript_product=hypothetical protein | location=TGGT1_chrXII:770981-774760(+) | protein_length=908 | sequence_SO=chromosome | SO=protein_coding_gene | is_pseudo=false	[R].RIESSDDEDLESEK.[E]	1xTMTpro [K14]; 1xTMTpro [N-Term]; 2xPhospho [S4(100); S5(100)]	TGGT1_219600-t26_1-p1 2xPhospho [S755(100); S756(100)]	24	High	1.72977e-06	9.56086e-05	1	1	TGGT1_219600-t26_1-p1	TGGT1_219600-t26_1-p1 [752-765]	1	2420.08	1.096	0.13	1	169.5	154.7	20.59	26.67	147.8	143.8	218.1	194.4	102.6	134	178.5	189.6		High	7.761e-05	6.687e-07	6.08
95726	TGGT1_243440	histone lysine acetyltransferase GCN5-B	transcript=TGGT1_243440-t26_1 | gene=TGGT1_243440 | organism=Toxoplasma_gondii_GT1 | gene_product=Histone lysine acetyltransferase GCN5-B [Source:UniProtKB/TrEMBL;Acc:A0A125YI36] | transcript_product=histone lysine acetyltransferase GCN5-B | location=TGGT1_chrVI:2548787-2555747(-) | protein_length=1032 | sequence_SO=chromosome | SO=protein_coding_gene | is_pseudo=false	[R].SSHAEPAEGPSLPSGADGR.[L]	1xTMTpro [N-Term]; 1xPhospho [S]		11	High	1.48251e-08	9.56086e-05	1	1	TGGT1_243440-t26_1-p1	TGGT1_243440-t26_1-p1 [161-179]	0	2206.01	1.171	0.23	1	62.9	53.7	13.32	12.97	NA	NA	57.2	69.1	NA	NA	58.9	49		High	7.761e-05	3.95e-09	6.83
25833	TGGT1_250700	hypothetical protein	transcript=TGGT1_250700-t26_1 | gene=TGGT1_250700 | organism=Toxoplasma_gondii_GT1 | gene_product=hypothetical protein | transcript_product=hypothetical protein | location=TGGT1_chrXII:5061393-5068428(+) | protein_length=1509 | sequence_SO=chromosome | SO=protein_coding_gene | is_pseudo=false	[R].ELEGFDSGGERR.[G]	1xTMTpro [N-Term]; 1xPhospho [S7(100)]	TGGT1_250700-t26_1-p1 1xPhospho [S542(100)]	13	High	5.511e-05	9.56086e-05	1	1	TGGT1_250700-t26_1-p1	TGGT1_250700-t26_1-p1 [536-547]	1	1735.8	1.372	0.46	0.0866514	138.1	100.7	5.38	14.9	131.7	140.1	136.2	149.3	82.8	100.8	119.6	100.6		High	7.761e-05	2.833e-05	4.35
25586	TGGT1_293440	hypothetical protein	transcript=TGGT1_293440-t26_1 | gene=TGGT1_293440 | organism=Toxoplasma_gondii_GT1 | gene_product=hypothetical protein | transcript_product=hypothetical protein | location=TGGT1_chrIa:306622-308238(-) | protein_length=538 | sequence_SO=chromosome | SO=protein_coding_gene | is_pseudo=false	[K].EKEESEPMVK.[E]	2xTMTpro [K2; K10]; 1xTMTpro [N-Term]; 1xPhospho [S5(100)]	TGGT1_293440-t26_1-p1 1xPhospho [S147(100)]	7	High	9.77363e-05	9.56086e-05	1	1	TGGT1_293440-t26_1-p1	TGGT1_293440-t26_1-p1 [143-152]	1	2198.16	1.006	0.01	1	578.7	575.6	13.93	18.01	519.6	500.4	653.5	644.6	513	448.4	645.8	656.2		High	0.0001044	5.745e-05	3.34
25584	TGGT1_318140	SART-1 family protein	transcript=TGGT1_318140-t26_1 | gene=TGGT1_318140 | organism=Toxoplasma_gondii_GT1 | gene_product=SART-1 family protein [Source:UniProtKB/TrEMBL;Acc:S7UKH3] | transcript_product=SART-1 family protein | location=TGGT1_chrIV:1468174-1476334(+) | protein_length=861 | sequence_SO=chromosome | SO=protein_coding_gene | is_pseudo=false	[K].EKEEGEADDSDNDGRGDER.[R]	1xTMTpro [K2]; 1xTMTpro [N-Term]; 1xPhospho [S10(100)]	TGGT1_318140-t26_1-p1 1xPhospho [S700(100)]	24	High	6.94667e-06	9.56086e-05	1	1	TGGT1_318140-t26_1-p1	TGGT1_318140-t26_1-p1 [691-709]	2	2811.22	1.064	0.09	1	217.6	204.6	42.13	40.46	145.4	151.4	312.9	324	146.5	144.3	285.8	314.7		High	7.761e-05	2.994e-06	4
25583	TGGT1_318140	SART-1 family protein	transcript=TGGT1_318140-t26_1 | gene=TGGT1_318140 | organism=Toxoplasma_gondii_GT1 | gene_product=SART-1 family protein [Source:UniProtKB/TrEMBL;Acc:S7UKH3] | transcript_product=SART-1 family protein | location=TGGT1_chrIV:1468174-1476334(+) | protein_length=861 | sequence_SO=chromosome | SO=protein_coding_gene | is_pseudo=false	[K].EKEEGEADDSDNDGR.[G]	1xTMTpro [K2]; 1xTMTpro [N-Term]; 1xPhospho [S10(100)]	TGGT1_318140-t26_1-p1 1xPhospho [S700(100)]	16	High	8.63016e-05	9.56086e-05	1	1	TGGT1_318140-t26_1-p1	TGGT1_318140-t26_1-p1 [691-705]	1	2354.03	1.105	0.14	1	287.4	260.2	20.03	9.88	232.4	256.1	322.6	359.2	248.1	229.9	272.8	287.7		High	7.761e-05	4.641e-05	3.26
25435	TGGT1_231630	alveolin domain containing intermediate filament IMC4	transcript=TGGT1_231630-t26_1 | gene=TGGT1_231630 | organism=Toxoplasma_gondii_GT1 | gene_product=Alveolin domain containing intermediate filament IMC4 [Source:UniProtKB/TrEMBL;Acc:A0A125YPY9] | transcript_product=alveolin domain containing intermediate filament IMC4 | location=TGGT1_chrVIII:1508307-1510463(-) | protein_length=452 | sequence_SO=chromosome | SO=protein_coding_gene | is_pseudo=false	[K].EHIPTALRSDQHSSGAMTPVSAGAAVGSAPASPAR.[G]	1xOxidation [M17]; 1xTMTpro [N-Term]; 3xPhospho [S13(100); S14(100); T/S]	TGGT1_231630-t26_1-p1 3xPhospho [S390(100); S391(100); T/S]	7	High	1.62296e-07	9.56086e-05	1	1	TGGT1_231630-t26_1-p1	TGGT1_231630-t26_1-p1 [378-412]	1	3944.77	1.055	0.08	1	57.5	54.5	1.06	6.52	NA	NA	57.9	57.1	NA	NA	52.1	57.1		High	7.761e-05	5.208e-08	5.97
25434	TGGT1_231630	alveolin domain containing intermediate filament IMC4	transcript=TGGT1_231630-t26_1 | gene=TGGT1_231630 | organism=Toxoplasma_gondii_GT1 | gene_product=Alveolin domain containing intermediate filament IMC4 [Source:UniProtKB/TrEMBL;Acc:A0A125YPY9] | transcript_product=alveolin domain containing intermediate filament IMC4 | location=TGGT1_chrVIII:1508307-1510463(-) | protein_length=452 | sequence_SO=chromosome | SO=protein_coding_gene | is_pseudo=false	[K].EHIPTALRSDQHSSGAMTPVSAGAAVGSAPASPAR.[G]	1xTMTpro [N-Term]; 3xPhospho [S9(100); S13(98.9); S14(98.9)]	TGGT1_231630-t26_1-p1 3xPhospho [S386(100); S390(98.9); S391(98.9)]	6	High	4.26148e-08	9.56086e-05	1	1	TGGT1_231630-t26_1-p1	TGGT1_231630-t26_1-p1 [378-412]	1	3928.78	1.11	0.15	1	57.7	52	35.68	31.21	34.3	45.7	75.9	72.8	40.1	39.9	67.3	71.5		High	7.761e-05	1.233e-08	6.76
25433	TGGT1_231630	alveolin domain containing intermediate filament IMC4	transcript=TGGT1_231630-t26_1 | gene=TGGT1_231630 | organism=Toxoplasma_gondii_GT1 | gene_product=Alveolin domain containing intermediate filament IMC4 [Source:UniProtKB/TrEMBL;Acc:A0A125YPY9] | transcript_product=alveolin domain containing intermediate filament IMC4 | location=TGGT1_chrVIII:1508307-1510463(-) | protein_length=452 | sequence_SO=chromosome | SO=protein_coding_gene | is_pseudo=false	[K].EHIPTALRSDQHSSGAMTPVSAGAAVGSAPASPAR.[G]	1xTMTpro [N-Term]; 2xPhospho [T/S]		1	High	1.66519e-06	9.56086e-05	1	1	TGGT1_231630-t26_1-p1	TGGT1_231630-t26_1-p1 [378-412]	1	3848.81	1.22	0.29	1	26.2	21.5	12.06	14.14	NA	NA	24.1	28.6	NA	NA	19.5	23.8		High	7.761e-05	6.414e-07	5.19
96282	TGGT1_237520	hypothetical protein	transcript=TGGT1_237520-t26_1 | gene=TGGT1_237520 | organism=Toxoplasma_gondii_GT1 | gene_product=SANT domain-containing protein [Source:UniProtKB/TrEMBL;Acc:S7UR69] | transcript_product=hypothetical protein | location=TGGT1_chrX:5838186-5841629(-) | protein_length=1147 | sequence_SO=chromosome | SO=protein_coding_gene | is_pseudo=false	[K].SSPNAGENAASGVASR.[G]	1xTMTpro [N-Term]; 1xPhospho [S]		1	High	1.90624e-05	9.56086e-05	1	1	TGGT1_237520-t26_1-p1	TGGT1_237520-t26_1-p1 [114-129]	0	1858.86	1.125	0.17	1	14.5	12.8	2.31	19.19	NA	NA	14.7	14.2	NA	NA	14.7	11.2		High	7.761e-05	8.925e-06	3.75
96283	TGGT1_237520	hypothetical protein	transcript=TGGT1_237520-t26_1 | gene=TGGT1_237520 | organism=Toxoplasma_gondii_GT1 | gene_product=SANT domain-containing protein [Source:UniProtKB/TrEMBL;Acc:S7UR69] | transcript_product=hypothetical protein | location=TGGT1_chrX:5838186-5841629(-) | protein_length=1147 | sequence_SO=chromosome | SO=protein_coding_gene | is_pseudo=false	[K].SSPNAGENAASGVASRGPATPESK.[R]	1xTMTpro [K24]; 1xTMTpro [N-Term]; 2xPhospho [S15(100); T20(100)]	TGGT1_237520-t26_1-p1 2xPhospho [S128(100); T133(100)]	2	High	9.25705e-06	9.56086e-05	1	1	TGGT1_237520-t26_1-p1	TGGT1_237520-t26_1-p1 [114-137]	1	3010.42	1.005	0.01	1	12.2	12.2	1.05	27.58	NA	NA	12.3	12.1	NA	NA	10	14.8		High	7.761e-05	4.086e-06	4.2
96298	TGGT1_272520	hypothetical protein	transcript=TGGT1_272520-t26_1 | gene=TGGT1_272520 | organism=Toxoplasma_gondii_GT1 | gene_product=hypothetical protein | transcript_product=hypothetical protein | location=TGGT1_chrVIII:3922939-3924461(+) | protein_length=401 | sequence_SO=chromosome | SO=protein_coding_gene | is_pseudo=false	[R].SSPPQHQGVR.[A]	1xTMTpro [N-Term]; 1xPhospho [S1(99.8)]	TGGT1_272520-t26_1-p1 1xPhospho [S55(99.8)]	6	High	0.000118161	9.56086e-05	1	1	TGGT1_272520-t26_1-p1	TGGT1_272520-t26_1-p1 [55-64]	0	1476.73	0.908	-0.14	1	28.8	31.7	22.05	20.13	19.7	31.5	26.2	33.3	31.5	24.5	40.2	31.9		High	0.0001044	6.994e-05	2.89
55042	TGGT1_230890	PHD-finger domain-containing protein	transcript=TGGT1_230890-t26_1 | gene=TGGT1_230890 | organism=Toxoplasma_gondii_GT1 | gene_product=PHD-finger domain-containing protein [Source:UniProtKB/TrEMBL;Acc:S7V282] | transcript_product=PHD-finger domain-containing protein | location=TGGT1_chrVIII:1075858-1079450(-) | protein_length=792 | sequence_SO=chromosome | SO=protein_coding_gene | is_pseudo=false	[K].LEVSSETENGGSQPVLDSR.[H]	1xTMTpro [N-Term]; 1xPhospho [S5(99.7)]	TGGT1_230890-t26_1-p1 1xPhospho [S226(99.7)]	4	High	8.57672e-07	9.56086e-05	1	1	TGGT1_230890-t26_1-p1	TGGT1_230890-t26_1-p1 [222-240]	0	2388.13	1.064	0.09	1	58.1	54.6	21.01	7.94	NA	NA	50	67.4	NA	NA	51.6	57.7		High	7.761e-05	3.135e-07	5.45
96343	TGGT1_204280	putative cell-cycle-associated protein kinase DYRK	transcript=TGGT1_204280-t26_1 | gene=TGGT1_204280 | organism=Toxoplasma_gondii_GT1 | gene_product=Protein kinase domain-containing protein [Source:UniProtKB/TrEMBL;Acc:S7UU58] | transcript_product=putative cell-cycle-associated protein kinase DYRK | location=TGGT1_chrVIIa:1825877-1830412(+) | protein_length=1180 | sequence_SO=chromosome | SO=protein_coding_gene | is_pseudo=false	[R].SSPSFGFHGGDESR.[A]	1xTMTpro [N-Term]; 1xPhospho [S2(99.6)]	TGGT1_204280-t26_1-p1 1xPhospho [S396(99.6)]	4	High	4.75856e-07	9.56086e-05	1	1	TGGT1_204280-t26_1-p1	TGGT1_204280-t26_1-p1 [395-408]	0	1850.8	0.939	-0.09	1	115.9	123.5	13.24	25.89	123.3	141.1	109.1	106.5	155.9	152.1	100.3	95.1		High	0.0001044	3.128e-07	4.73
77646	TGGT1_271740	hypothetical protein	transcript=TGGT1_271740-t26_1 | gene=TGGT1_271740 | organism=Toxoplasma_gondii_GT1 | gene_product=hypothetical protein | transcript_product=hypothetical protein | location=TGGT1_chrVIII:4419752-4431388(+) | protein_length=1992 | sequence_SO=chromosome | SO=protein_coding_gene | is_pseudo=false	[K].RKSDLVNAELAEK.[K]	2xTMTpro [K2; K13]; 1xTMTpro [N-Term]; 1xPhospho [S3(100)]	TGGT1_271740-t26_1-p1 1xPhospho [S653(100)]	1	High	1.91505e-07	9.56086e-05	1	1	TGGT1_271740-t26_1-p1	TGGT1_271740-t26_1-p1 [651-663]	2	2465.39	0.984	-0.02	1	238	241.9	1.95	1.86	NA	NA	234.8	241.4	NA	NA	238.7	245.1		High	7.761e-05	6.233e-08	6.16
55086	TGGT1_255740	hypothetical protein	transcript=TGGT1_255740-t26_1 | gene=TGGT1_255740 | organism=Toxoplasma_gondii_GT1 | gene_product=RTR1-type domain-containing protein [Source:UniProtKB/TrEMBL;Acc:S7WI29] | transcript_product=hypothetical protein | location=TGGT1_chrVIIb:4590851-4599916(-) | protein_length=1706 | sequence_SO=chromosome | SO=protein_coding_gene | is_pseudo=false	[R].LFASGENPGAAQSPR.[E]	1xTMTpro [N-Term]; 1xPhospho [S13(100)]	TGGT1_255740-t26_1-p1 1xPhospho [S410(100)]	6	High	8.88312e-06	9.56086e-05	1	1	TGGT1_255740-t26_1-p1	TGGT1_255740-t26_1-p1 [398-412]	0	1885.91	1.247	0.32	1	155.8	124.9	32.69	36.28	131	93.8	185.3	203.1	94.7	86.8	164.8	180.4		High	7.761e-05	3.906e-06	5.23
25385	TGGT1_224940	hypothetical protein	transcript=TGGT1_224940-t26_1 | gene=TGGT1_224940 | organism=Toxoplasma_gondii_GT1 | gene_product=hypothetical protein | transcript_product=hypothetical protein | location=TGGT1_chrX:2561604-2566917(+) | protein_length=846 | sequence_SO=chromosome | SO=protein_coding_gene | is_pseudo=false	[R].EHEQGESEAGRDSGGEGWLPATK.[F]	1xTMTpro [K23]; 1xTMTpro [N-Term]; 2xPhospho [S7(100); S13(100)]	TGGT1_224940-t26_1-p1 2xPhospho [S482(100); S488(100)]	1	High	1.86346e-06	9.56086e-05	1	1	TGGT1_224940-t26_1-p1	TGGT1_224940-t26_1-p1 [476-498]	1	3195.43	1.127	0.17	1	71.9	63.8	3.54	9.12	70.1	73.7	NA	NA	68	59.8	NA	NA		High	0.0001044	1.18e-06	4.99
25383	TGGT1_304630	ATG C terminal domain-containing protein	transcript=TGGT1_304630-t26_1 | gene=TGGT1_304630 | organism=Toxoplasma_gondii_GT1 | gene_product=ATG C terminal domain-containing protein [Source:UniProtKB/TrEMBL;Acc:S7W9P3] | transcript_product=ATG C terminal domain-containing protein | location=TGGT1_chrVIIa:524945-552364(+) | protein_length=8080 | sequence_SO=chromosome | SO=protein_coding_gene | is_pseudo=false	[K].EHEDANGCASMFSPR.[E]	1xOxidation [M11]; 1xMethylthio [C8]; 1xTMTpro [N-Term]; 1xPhospho [S]	TGGT1_304630-t26_1-p1 1xMethylthio [C1873]	2	High	0.00011781	9.56086e-05	1	1	TGGT1_304630-t26_1-p1	TGGT1_304630-t26_1-p1 [1866-1880]	0	2096.82	1.689	0.76	1	20.8	12.3	24.99	0.45	24.9	17.4	NA	NA	12.3	12.4	NA	NA		High	0.0001044	6.969e-05	2.07
25382	TGGT1_304630	ATG C terminal domain-containing protein	transcript=TGGT1_304630-t26_1 | gene=TGGT1_304630 | organism=Toxoplasma_gondii_GT1 | gene_product=ATG C terminal domain-containing protein [Source:UniProtKB/TrEMBL;Acc:S7W9P3] | transcript_product=ATG C terminal domain-containing protein | location=TGGT1_chrVIIa:524945-552364(+) | protein_length=8080 | sequence_SO=chromosome | SO=protein_coding_gene | is_pseudo=false	[K].EHEDANGCASMFSPR.[E]	1xMethylthio [C8]; 1xTMTpro [N-Term]; 1xPhospho [S13(100)]	TGGT1_304630-t26_1-p1 1xMethylthio [C1873]; 1xPhospho [S1878(100)]	2	High	2.97882e-05	9.56086e-05	1	1	TGGT1_304630-t26_1-p1	TGGT1_304630-t26_1-p1 [1866-1880]	0	2080.82	0.815	-0.29	1	46.3	56.8	31.77	46.03	35.3	37.7	56.9	68.1	29.7	40.6	82	79.4		High	0.0001044	1.76e-05	3.12
25376	TGGT1_203665	hypothetical protein	transcript=TGGT1_203665-t26_1 | gene=TGGT1_203665 | organism=Toxoplasma_gondii_GT1 | gene_product=Chorein_N domain-containing protein [Source:UniProtKB/TrEMBL;Acc:S7UV31] | transcript_product=hypothetical protein | location=TGGT1_chrVIIa:2256548-2289556(-) | protein_length=9741 | sequence_SO=chromosome | SO=protein_coding_gene | is_pseudo=false	[R].EHDDGDTSEVDDNEAELELYR.[Q]	1xTMTpro [N-Term]; 1xPhospho [T/S/Y]		5	High	2.50105e-08	9.56086e-05	1	1	TGGT1_203665-t26_1-p1	TGGT1_203665-t26_1-p1 [748-768]	0	2835.18	1.306	0.38	1	20.7	15.9	22.27	22.1	NA	NA	17.7	24.3	NA	NA	18.6	13.6		High	7.761e-05	6.938e-09	5.91
96395	TGGT1_264860	zinc finger, C3HC4 type (RING finger) domain-containing protein	transcript=TGGT1_264860-t26_1 | gene=TGGT1_264860 | organism=Toxoplasma_gondii_GT1 | gene_product=RING-type domain-containing protein [Source:UniProtKB/TrEMBL;Acc:S7VP61] | transcript_product=zinc finger, C3HC4 type (RING finger) domain-containing protein | location=TGGT1_chrIX:1768340-1781509(-) | protein_length=3868 | sequence_SO=chromosome | SO=protein_coding_gene | is_pseudo=false	[R].SSPSVLEPHTCSQEK.[G]	1xMethylthio [C11]; 1xTMTpro [K15]; 1xTMTpro [N-Term]; 1xPhospho [S4(99.7)]	TGGT1_264860-t26_1-p1 1xMethylthio [C2020]; 1xPhospho [S2013(99.7)]	6	High	7.88693e-05	9.56086e-05	1	1	TGGT1_264860-t26_1-p1	TGGT1_264860-t26_1-p1 [2010-2024]	0	2363.13	0.813	-0.3	1	94.8	116.5	30.54	29.7	118.2	130.8	76	70.3	160.5	148	91.5	91.7		High	0.0001044	4.621e-05	3.24
55118	TGGT1_289120	hypothetical protein	transcript=TGGT1_289120-t26_1 | gene=TGGT1_289120 | organism=Toxoplasma_gondii_GT1 | gene_product=hypothetical protein | transcript_product=hypothetical protein | location=TGGT1_chrIX:2810023-2824894(+) | protein_length=2701 | sequence_SO=chromosome | SO=protein_coding_gene | is_pseudo=false	[R].LFEGQELPGPLPSLSPLPDSPR.[S]	1xTMTpro [N-Term]; 1xPhospho [S20(100)]	TGGT1_289120-t26_1-p1 1xPhospho [S58(100)]	4	High	4.62655e-07	9.56086e-05	1	1	TGGT1_289120-t26_1-p1	TGGT1_289120-t26_1-p1 [39-60]	0	2730.41	0.825	-0.28	1	15.9	19.3	38.51	26.36	16.5	26.3	15.3	10.5	24.4	20.1	18.6	12.4		High	0.0001044	3.047e-07	4.3
25367	TGGT1_306020	hypothetical protein	transcript=TGGT1_306020-t26_1 | gene=TGGT1_306020 | organism=Toxoplasma_gondii_GT1 | gene_product=hypothetical protein | transcript_product=hypothetical protein | location=TGGT1_chrIX:5506123-5536326(+) | protein_length=8858 | sequence_SO=chromosome | SO=protein_coding_gene | is_pseudo=false	[R].EHALCEGDEYLDTDSEDETAK.[V]	1xMethylthio [C5]; 1xTMTpro [K21]; 1xTMTpro [N-Term]; 1xPhospho [S15(100)]	TGGT1_306020-t26_1-p1 1xMethylthio [C7540]; 1xPhospho [S7550(100)]	3	High	8.32473e-10	9.56086e-05	1	1	TGGT1_306020-t26_1-p1	TGGT1_306020-t26_1-p1 [7536-7556]	0	3104.32	1.218	0.28	1	36.5	30	34.57	22	30.6	23	43.6	51.7	26.3	25.1	39.7	34.3		High	7.761e-05	1.77e-10	6.56
25364	TGGT1_244700	NAD(+)/NADH kinase domain-containing protein	transcript=TGGT1_244700-t26_1 | gene=TGGT1_244700 | organism=Toxoplasma_gondii_GT1 | gene_product=NAD(+)/NADH kinase domain-containing protein [Source:UniProtKB/TrEMBL;Acc:S7W7F5] | transcript_product=NAD(+)/NADH kinase domain-containing protein | location=TGGT1_chrVI:3371487-3383046(+) | protein_length=2109 | sequence_SO=chromosome | SO=protein_coding_gene | is_pseudo=false	[R].EHAGDETEEEELEGGEAGEGSEVDWR.[G]	1xTMTpro [N-Term]; 2xPhospho [T7(100); S21(100)]	TGGT1_244700-t26_1-p1 2xPhospho [T1037(100); S1051(100)]	5	High	1.54591e-09	9.56086e-05	1	1	TGGT1_244700-t26_1-p1	TGGT1_244700-t26_1-p1 [1031-1056]	0	3310.29	1.183	0.24	1	20.2	17.1	16.63	24.67	NA	NA	22.7	18	NA	NA	20.4	14.3		High	7.761e-05	3.449e-10	6.91
25363	TGGT1_244700	NAD(+)/NADH kinase domain-containing protein	transcript=TGGT1_244700-t26_1 | gene=TGGT1_244700 | organism=Toxoplasma_gondii_GT1 | gene_product=NAD(+)/NADH kinase domain-containing protein [Source:UniProtKB/TrEMBL;Acc:S7W7F5] | transcript_product=NAD(+)/NADH kinase domain-containing protein | location=TGGT1_chrVI:3371487-3383046(+) | protein_length=2109 | sequence_SO=chromosome | SO=protein_coding_gene | is_pseudo=false	[R].EHAGDETEEEELEGGEAGEGSEVDWR.[G]	1xTMTpro [N-Term]; 1xPhospho [T7(100)]	TGGT1_244700-t26_1-p1 1xPhospho [T1037(100)]	6	High	2.44743e-11	9.56086e-05	1	1	TGGT1_244700-t26_1-p1	TGGT1_244700-t26_1-p1 [1031-1056]	0	3230.32	0.987	-0.02	1	27.8	28.2	25.52	1.07	NA	NA	23.2	33.4	NA	NA	28.4	28		High	7.761e-05	3.949e-12	7.38
25362	TGGT1_311250	hypothetical protein	transcript=TGGT1_311250-t26_1 | gene=TGGT1_311250 | organism=Toxoplasma_gondii_GT1 | gene_product=BTB domain-containing protein [Source:UniProtKB/TrEMBL;Acc:S7UTR3] | transcript_product=hypothetical protein | location=TGGT1_chrXI:1874376-1883214(+) | protein_length=1848 | sequence_SO=chromosome | SO=protein_coding_gene | is_pseudo=false	[R].EHAEVEDSPDAR.[S]	1xTMTpro [N-Term]; 1xPhospho [S8(100)]	TGGT1_311250-t26_1-p1 1xPhospho [S522(100)]	19	High	4.60409e-06	9.56086e-05	1	1	TGGT1_311250-t26_1-p1	TGGT1_311250-t26_1-p1 [515-526]	0	1738.76	1.141	0.19	1	92.7	81.2	62.3	53.6	161.6	174	53.2	47.7	124.7	148.7	52.9	49.5		High	0.0001044	2.844e-06	4.18
25347	TGGT1_225310	putative ARF1-directed GTPase-activating protein	transcript=TGGT1_225310-t26_1 | gene=TGGT1_225310 | organism=Toxoplasma_gondii_GT1 | gene_product=Arf-GAP domain-containing protein [Source:UniProtKB/TrEMBL;Acc:A0A125YW26] | transcript_product=putative ARF1-directed GTPase-activating protein | location=TGGT1_chrX:2229573-2233633(+) | protein_length=502 | sequence_SO=chromosome | SO=protein_coding_gene | is_pseudo=false	[K].EGYGSTEESPDENPQFPTLESRGSR.[E]	1xTMTpro [N-Term]; 2xPhospho [S21(99.3); S24(100)]	TGGT1_225310-t26_1-p1 2xPhospho [S484(99.3); S487(100)]	6	High	0.000101065	9.56086e-05	1	1	TGGT1_225310-t26_1-p1	TGGT1_225310-t26_1-p1 [464-488]	1	3233.36	0.524	-0.93	1	9.5	18.1	28.32	53.38	12.1	NA	6.7	9.5	30.7	23.8	8	13.7		High	7.761e-05	5.525e-05	3.13
55113	TGGT1_278030	hypothetical protein	transcript=TGGT1_278030-t26_1 | gene=TGGT1_278030 | organism=Toxoplasma_gondii_GT1 | gene_product=hypothetical protein | transcript_product=hypothetical protein | location=TGGT1_chrXII:6257076-6266408(+) | protein_length=2220 | sequence_SO=chromosome | SO=protein_coding_gene | is_pseudo=false	[K].LFEEENEAPSAEASPAGSR.[R]	1xTMTpro [N-Term]; 1xPhospho [S10(100)]	TGGT1_278030-t26_1-p1 1xPhospho [S743(100)]	3	High	8.89469e-07	9.56086e-05	1	1	TGGT1_278030-t26_1-p1	TGGT1_278030-t26_1-p1 [734-752]	0	2375.07	1.028	0.04	1	72.5	70.6	8.43	24.63	71.5	64.8	79.7	73.5	58.5	53.3	85.1	86.8		High	7.761e-05	3.263e-07	4.83
55016	TGGT1_217680	hypothetical protein	transcript=TGGT1_217680-t26_1 | gene=TGGT1_217680 | organism=Toxoplasma_gondii_GT1 | gene_product=hypothetical protein | transcript_product=hypothetical protein | location=TGGT1_chrXII:1930956-1942802(-) | protein_length=2213 | sequence_SO=chromosome | SO=protein_coding_gene | is_pseudo=false	[K].LETSGFNSDNEETLASSR.[V]	1xTMTpro [N-Term]; 1xPhospho [S8(100)]	TGGT1_217680-t26_1-p1 1xPhospho [S1310(100)]	4	High	5.6045e-06	9.56086e-05	1	1	TGGT1_217680-t26_1-p1	TGGT1_217680-t26_1-p1 [1303-1320]	0	2341.05	0.772	-0.37	1	9.2	11.9	53.37	0.71	NA	NA	13.6	6.2	NA	NA	11.9	11.8		High	7.761e-05	3.403e-06	3.9
25582	TGGT1_312230	putative DNA topoisomerase 2	transcript=TGGT1_312230-t26_1 | gene=TGGT1_312230 | organism=Toxoplasma_gondii_GT1 | gene_product=DNA topoisomerase 2 [Source:UniProtKB/TrEMBL;Acc:S7W1T2] | transcript_product=putative DNA topoisomerase 2 | location=TGGT1_chrXI:2472947-2490813(-) | protein_length=1658 | sequence_SO=chromosome | SO=protein_coding_gene | is_pseudo=false	[K].EKEEFDESDDDWDEGPKR.[K]	2xTMTpro [K2; K17]; 1xTMTpro [N-Term]; 1xPhospho [S8(100)]	TGGT1_312230-t26_1-p1 1xPhospho [S313(100)]	1	High	5.4064e-05	9.56086e-05	1	1	TGGT1_312230-t26_1-p1	TGGT1_312230-t26_1-p1 [306-323]	2	3218.5	1.115	0.16	1	30.3	27.2	23.27	3.73	NA	NA	35.7	25.6	NA	NA	26.4	27.9		High	7.761e-05	2.77e-05	2.62
25581	TGGT1_312230	putative DNA topoisomerase 2	transcript=TGGT1_312230-t26_1 | gene=TGGT1_312230 | organism=Toxoplasma_gondii_GT1 | gene_product=DNA topoisomerase 2 [Source:UniProtKB/TrEMBL;Acc:S7W1T2] | transcript_product=putative DNA topoisomerase 2 | location=TGGT1_chrXI:2472947-2490813(-) | protein_length=1658 | sequence_SO=chromosome | SO=protein_coding_gene | is_pseudo=false	[K].EKEEFDESDDDWDEGPK.[R]	2xTMTpro [K2; K17]; 1xTMTpro [N-Term]; 1xPhospho [S8(100)]	TGGT1_312230-t26_1-p1 1xPhospho [S313(100)]	6	High	2.42237e-07	9.56086e-05	1	1	TGGT1_312230-t26_1-p1	TGGT1_312230-t26_1-p1 [306-322]	1	3062.4	1.04	0.06	1	389.8	374.6	41.65	36.57	610.4	541.1	280.8	266.2	515	522.2	272.5	265.9		High	0.0001044	1.623e-07	4.72
25576	TGGT1_261450	hypothetical protein	transcript=TGGT1_261450-t26_1 | gene=TGGT1_261450 | organism=Toxoplasma_gondii_GT1 | gene_product=hypothetical protein | transcript_product=hypothetical protein | location=TGGT1_chrVIIb:1712431-1719358(-) | protein_length=1112 | sequence_SO=chromosome | SO=protein_coding_gene | is_pseudo=false	[R].EKEDSADEPAANDSDTVEEDDDHR.[L]	1xTMTpro [K2]; 1xTMTpro [N-Term]; 3xPhospho [S5(100); S14(100); T16(100)]	TGGT1_261450-t26_1-p1 3xPhospho [S517(100); S526(100); T528(100)]	11	High	1.2758e-06	9.56086e-05	1	1	TGGT1_261450-t26_1-p1	TGGT1_261450-t26_1-p1 [513-536]	1	3537.37	0.766	-0.38	1	22.3	29.1	0.48	2.73	NA	NA	22.4	22.2	NA	NA	28.6	29.7		High	7.761e-05	4.818e-07	5.45
25575	TGGT1_261450	hypothetical protein	transcript=TGGT1_261450-t26_1 | gene=TGGT1_261450 | organism=Toxoplasma_gondii_GT1 | gene_product=hypothetical protein | transcript_product=hypothetical protein | location=TGGT1_chrVIIb:1712431-1719358(-) | protein_length=1112 | sequence_SO=chromosome | SO=protein_coding_gene | is_pseudo=false	[R].EKEDSADEPAANDSDTVEEDDDHR.[L]	1xTMTpro [K2]; 1xTMTpro [N-Term]; 2xPhospho [S5(100); S14(100)]	TGGT1_261450-t26_1-p1 2xPhospho [S517(100); S526(100)]	37	High	4.76909e-08	9.56086e-05	1	1	TGGT1_261450-t26_1-p1	TGGT1_261450-t26_1-p1 [513-536]	1	3457.41	1.21	0.28	1	80.3	66.4	46.05	53.51	136.2	104.5	61.8	48	114.8	100.2	44	36.2		High	0.0001044	3.343e-08	6.36
25574	TGGT1_261450	hypothetical protein	transcript=TGGT1_261450-t26_1 | gene=TGGT1_261450 | organism=Toxoplasma_gondii_GT1 | gene_product=hypothetical protein | transcript_product=hypothetical protein | location=TGGT1_chrVIIb:1712431-1719358(-) | protein_length=1112 | sequence_SO=chromosome | SO=protein_coding_gene | is_pseudo=false	[R].EKEDSADEPAANDSDTVEEDDDHR.[L]	1xTMTpro [K2]; 1xTMTpro [N-Term]; 1xPhospho [S5(100)]	TGGT1_261450-t26_1-p1 1xPhospho [S517(100)]	23	High	2.3435e-07	9.56086e-05	1	1	TGGT1_261450-t26_1-p1	TGGT1_261450-t26_1-p1 [513-536]	1	3377.44	1.075	0.1	1	85.4	79.5	0.79	2.07	NA	NA	85	85.9	NA	NA	80.7	78.4		High	7.761e-05	7.738e-08	4.92
96015	TGGT1_300270	hypothetical protein	transcript=TGGT1_300270-t26_1 | gene=TGGT1_300270 | organism=Toxoplasma_gondii_GT1 | gene_product=hypothetical protein | transcript_product=hypothetical protein | location=TGGT1_chrXII:77129-81016(+) | protein_length=518 | sequence_SO=chromosome | SO=protein_coding_gene | is_pseudo=false	[K].SSLSPVSSPITR.[G]	1xTMTpro [N-Term]; 2xPhospho [S4(100); S8(99.6)]	TGGT1_300270-t26_1-p1 2xPhospho [S492(100); S496(99.6)]	2	High	0.000105285	9.56086e-05	1	1	TGGT1_300270-t26_1-p1	TGGT1_300270-t26_1-p1 [489-500]	0	1694.81	1.038	0.05	1	45.2	43.5	14.04	6.26	40.9	49.9	NA	NA	45.5	41.6	NA	NA		High	0.0001044	6.207e-05	3.91
25566	TGGT1_304630	ATG C terminal domain-containing protein	transcript=TGGT1_304630-t26_1 | gene=TGGT1_304630 | organism=Toxoplasma_gondii_GT1 | gene_product=ATG C terminal domain-containing protein [Source:UniProtKB/TrEMBL;Acc:S7W9P3] | transcript_product=ATG C terminal domain-containing protein | location=TGGT1_chrVIIa:524945-552364(+) | protein_length=8080 | sequence_SO=chromosome | SO=protein_coding_gene | is_pseudo=false	[R].EKDSGPEVDSPFEEAER.[G]	1xTMTpro [K2]; 1xTMTpro [N-Term]; 2xPhospho [S4(100); S10(100)]	TGGT1_304630-t26_1-p1 2xPhospho [S1382(100); S1388(100)]	7	High	9.82321e-06	9.56086e-05	1	1	TGGT1_304630-t26_1-p1	TGGT1_304630-t26_1-p1 [1379-1395]	1	2689.19	1.217	0.28	1	84.8	69.6	6.76	23.34	81.6	80.1	92.6	88.1	59	54.6	82.2	87.9		High	0.0001044	5.943e-06	5.01
25565	TGGT1_304630	ATG C terminal domain-containing protein	transcript=TGGT1_304630-t26_1 | gene=TGGT1_304630 | organism=Toxoplasma_gondii_GT1 | gene_product=ATG C terminal domain-containing protein [Source:UniProtKB/TrEMBL;Acc:S7W9P3] | transcript_product=ATG C terminal domain-containing protein | location=TGGT1_chrVIIa:524945-552364(+) | protein_length=8080 | sequence_SO=chromosome | SO=protein_coding_gene | is_pseudo=false	[R].EKDSGPEVDSPFEEAER.[G]	1xTMTpro [K2]; 1xTMTpro [N-Term]; 1xPhospho [S4(100)]	TGGT1_304630-t26_1-p1 1xPhospho [S1382(100)]	5	High	1.05448e-05	9.56086e-05	1	1	TGGT1_304630-t26_1-p1	TGGT1_304630-t26_1-p1 [1379-1395]	1	2609.23	0.911	-0.13	1	105.6	115.9	37.31	40.2	79.8	76.8	161.5	139.8	70.3	85.4	162.2	157.4		High	0.0001044	6.37e-06	3.11
25563	TGGT1_238510	hypothetical protein	transcript=TGGT1_238510-t26_1 | gene=TGGT1_238510 | organism=Toxoplasma_gondii_GT1 | gene_product=RanBP2-type domain-containing protein [Source:UniProtKB/TrEMBL;Acc:S7URW5] | transcript_product=hypothetical protein | location=TGGT1_chrVI:255604-259176(+) | protein_length=1082 | sequence_SO=chromosome | SO=protein_coding_gene | is_pseudo=false	[R].EKDPLSNPAGASDSEQEAGR.[R]	1xTMTpro [K2]; 1xTMTpro [N-Term]; 1xPhospho [S12(99.5)]	TGGT1_238510-t26_1-p1 1xPhospho [S231(99.5)]	2	High	0.000143245	9.56086e-05	1	1	TGGT1_238510-t26_1-p1	TGGT1_238510-t26_1-p1 [220-239]	1	2746.32	1.11	0.15	1	19.7	17.8	22.8	28.22	NA	NA	23.2	16.8	NA	NA	14.5	21.7		High	7.761e-05	8.182e-05	2.85
77782	TGGT1_225940	hypothetical protein	transcript=TGGT1_225940-t26_1 | gene=TGGT1_225940 | organism=Toxoplasma_gondii_GT1 | gene_product=IMP2_N domain-containing protein [Source:UniProtKB/TrEMBL;Acc:S7UWV2] | transcript_product=hypothetical protein | location=TGGT1_chrX:1829329-1830851(-) | protein_length=315 | sequence_SO=chromosome | SO=protein_coding_gene | is_pseudo=false	[K].RIDEEELVPDSTTTEEALK.[E]	1xTMTpro [K19]; 1xTMTpro [N-Term]; 2xPhospho [S11(99.6); T14(99.6)]	TGGT1_225940-t26_1-p1 2xPhospho [S40(99.6); T43(99.6)]	4	High	7.83062e-07	9.56086e-05	1	1	TGGT1_225940-t26_1-p1	TGGT1_225940-t26_1-p1 [30-48]	1	2943.41	0.992	-0.01	1	57.9	58.4	18.01	2.83	NA	NA	65.9	51	NA	NA	57.2	59.6		High	7.761e-05	2.842e-07	5.53
77781	TGGT1_225940	hypothetical protein	transcript=TGGT1_225940-t26_1 | gene=TGGT1_225940 | organism=Toxoplasma_gondii_GT1 | gene_product=IMP2_N domain-containing protein [Source:UniProtKB/TrEMBL;Acc:S7UWV2] | transcript_product=hypothetical protein | location=TGGT1_chrX:1829329-1830851(-) | protein_length=315 | sequence_SO=chromosome | SO=protein_coding_gene | is_pseudo=false	[K].RIDEEELVPDSTTTEEALK.[E]	1xTMTpro [K19]; 1xTMTpro [N-Term]; 1xPhospho [T/S]		7	High	1.70839e-07	9.56086e-05	1	1	TGGT1_225940-t26_1-p1	TGGT1_225940-t26_1-p1 [30-48]	1	2863.45	0.948	-0.08	1	74.1	78.2	19.93	28.64	80.2	99.5	64.9	68.5	107.7	94.1	58.9	65		High	7.761e-05	5.508e-08	5.35
54959	TGGT1_224270	hypothetical protein	transcript=TGGT1_224270-t26_1 | gene=TGGT1_224270 | organism=Toxoplasma_gondii_GT1 | gene_product=hypothetical protein | transcript_product=hypothetical protein | location=TGGT1_chrX:3043060-3054241(-) | protein_length=3378 | sequence_SO=chromosome | SO=protein_coding_gene | is_pseudo=false	[R].LETDGEGHGK.[A]	1xTMTpro [K10]; 1xTMTpro [N-Term]; 1xPhospho [T3(100)]	TGGT1_224270-t26_1-p1 1xPhospho [T2907(100)]	5	High	7.56127e-05	9.56086e-05	1	1	TGGT1_224270-t26_1-p1	TGGT1_224270-t26_1-p1 [2905-2914]	0	1730.86	1.096	0.13	1	139.6	127.3	22.37	26.79	167.6	168.8	111.1	116.3	168.3	147.2	92	110.1		High	7.761e-05	4.01e-05	3.36
25552	TGGT1_311480	hypothetical protein	transcript=TGGT1_311480-t26_1 | gene=TGGT1_311480 | organism=Toxoplasma_gondii_GT1 | gene_product=hypothetical protein | transcript_product=hypothetical protein | location=TGGT1_chrXI:2071805-2077652(-) | protein_length=386 | sequence_SO=chromosome | SO=protein_coding_gene | is_pseudo=false	[K].EKDDDDQGDVSTSASPLPK.[S]	2xTMTpro [K2; K19]; 1xTMTpro [N-Term]; 1xPhospho [S11(99.3)]	TGGT1_311480-t26_1-p1 1xPhospho [S206(99.3)]	3	High	0.000102145	9.56086e-05	1	1	TGGT1_311480-t26_1-p1	TGGT1_311480-t26_1-p1 [196-214]	1	2996.49	1.198	0.26	1	36.6	30.5	36.61	37.44	19.8	29.8	47.3	44.9	18.4	24.9	37.5	44		High	7.761e-05	5.594e-05	2.72
54964	TGGT1_219682	putative pyruvate dehydrogenase kinase	transcript=TGGT1_219682-t26_1 | gene=TGGT1_219682 | organism=Toxoplasma_gondii_GT1 | gene_product=Protein-serine/threonine kinase [Source:UniProtKB/TrEMBL;Acc:S7WAL4] | transcript_product=putative pyruvate dehydrogenase kinase | location=TGGT1_chrXII:667060-674721(-) | protein_length=756 | sequence_SO=chromosome | SO=protein_coding_gene | is_pseudo=false	[K].LETEEGSPSEGLGMTETDTR.[S]	1xTMTpro [N-Term]; 1xPhospho [S7(100)]	TGGT1_219682-t26_1-p1 1xPhospho [S633(100)]	4	High	1.50286e-06	9.56086e-05	1	1	TGGT1_219682-t26_1-p1	TGGT1_219682-t26_1-p1 [627-646]	0	2523.11	1.334	0.42	1	5.7	4.3	57.09	40.29	NA	NA	8.7	3.7	NA	NA	3.2	5.7		High	7.761e-05	5.745e-07	4.54
54965	TGGT1_219682	putative pyruvate dehydrogenase kinase	transcript=TGGT1_219682-t26_1 | gene=TGGT1_219682 | organism=Toxoplasma_gondii_GT1 | gene_product=Protein-serine/threonine kinase [Source:UniProtKB/TrEMBL;Acc:S7WAL4] | transcript_product=putative pyruvate dehydrogenase kinase | location=TGGT1_chrXII:667060-674721(-) | protein_length=756 | sequence_SO=chromosome | SO=protein_coding_gene | is_pseudo=false	[K].LETEEGSPSEGLGMTETDTR.[S]	1xOxidation [M14]; 1xTMTpro [N-Term]; 1xPhospho [S7(100)]	TGGT1_219682-t26_1-p1 1xPhospho [S633(100)]	1	High	2.47722e-05	9.56086e-05	1	1	TGGT1_219682-t26_1-p1	TGGT1_219682-t26_1-p1 [627-646]	0	2539.11	0.808	-0.31	1	9.8	12.1	1.99	5.68	NA	NA	9.9	9.6	NA	NA	11.6	12.6		High	7.761e-05	1.185e-05	3.35
55012	TGGT1_211630	hypothetical protein	transcript=TGGT1_211630-t26_1 | gene=TGGT1_211630 | organism=Toxoplasma_gondii_GT1 | gene_product=hypothetical protein | transcript_product=hypothetical protein | location=TGGT1_chrIV:1587042-1589369(+) | protein_length=213 | sequence_SO=chromosome | SO=protein_coding_gene | is_pseudo=false	[K].LETSDSTEAEIMAQR.[R]	1xTMTpro [N-Term]; 2xPhospho [T3(99.7); S6(100)]	TGGT1_211630-t26_1-p1 2xPhospho [T22(99.7); S25(100)]	3	High	3.96391e-05	9.56086e-05	1	1	TGGT1_211630-t26_1-p1	TGGT1_211630-t26_1-p1 [20-34]	0	2144.91	0.478	-1.06	1	21.3	44.6	2.91	6.31	21.8	20.9	NA	NA	46.7	42.7	NA	NA		High	0.0001044	2.331e-05	5.29
25453	TGGT1_314780	myosin G	transcript=TGGT1_314780-t26_1 | gene=TGGT1_314780 | organism=Toxoplasma_gondii_GT1 | gene_product=Myosin G [Source:UniProtKB/TrEMBL;Acc:A0A125YZG6] | transcript_product=myosin G | location=TGGT1_chrXI:4226752-4246422(-) | protein_length=2059 | sequence_SO=chromosome | SO=protein_coding_gene | is_pseudo=false	[R].EHNGDSGRNSEIQQGSEK.[G]	1xTMTpro [K18]; 1xTMTpro [N-Term]; 1xPhospho [S]		2	High	5.8644e-05	9.56086e-05	1	1	TGGT1_314780-t26_1-p1	TGGT1_314780-t26_1-p1 [1969-1986]	1	2660.26	1.241	0.31	1	21.6	17.4	7.49	2.72	NA	NA	20.4	22.7	NA	NA	17.7	17		High	7.761e-05	3.031e-05	3.18
25454	TGGT1_314780	myosin G	transcript=TGGT1_314780-t26_1 | gene=TGGT1_314780 | organism=Toxoplasma_gondii_GT1 | gene_product=Myosin G [Source:UniProtKB/TrEMBL;Acc:A0A125YZG6] | transcript_product=myosin G | location=TGGT1_chrXI:4226752-4246422(-) | protein_length=2059 | sequence_SO=chromosome | SO=protein_coding_gene | is_pseudo=false	[R].EHNGDSGRNSEIQQGSEK.[G]	1xTMTpro [K18]; 1xTMTpro [N-Term]; 2xPhospho [S6(100); S10(100)]	TGGT1_314780-t26_1-p1 2xPhospho [S1974(100); S1978(100)]	17	High	7.2633e-06	9.56086e-05	1	1	TGGT1_314780-t26_1-p1	TGGT1_314780-t26_1-p1 [1969-1986]	1	2740.22	0.911	-0.13	1	70.1	76.9	15.95	20.51	56.5	66.8	83	73.5	64.4	65.2	90.6	94.6		High	0.0001044	4.431e-06	4.95
55011	TGGT1_211630	hypothetical protein	transcript=TGGT1_211630-t26_1 | gene=TGGT1_211630 | organism=Toxoplasma_gondii_GT1 | gene_product=hypothetical protein | transcript_product=hypothetical protein | location=TGGT1_chrIV:1587042-1589369(+) | protein_length=213 | sequence_SO=chromosome | SO=protein_coding_gene | is_pseudo=false	[K].LETSDSTEAEIMAQR.[R]	1xOxidation [M12]; 1xTMTpro [N-Term]; 1xPhospho [S6(100)]	TGGT1_211630-t26_1-p1 1xPhospho [S25(100)]	12	High	1.49983e-05	9.56086e-05	1	1	TGGT1_211630-t26_1-p1	TGGT1_211630-t26_1-p1 [20-34]	0	2080.94	0.853	-0.23	1	64.8	75.9	26.39	28.67	77.6	72.1	58.2	40.8	125.4	73.7	76.5	75.3		High	0.0001044	8.989e-06	4.72
55010	TGGT1_211630	hypothetical protein	transcript=TGGT1_211630-t26_1 | gene=TGGT1_211630 | organism=Toxoplasma_gondii_GT1 | gene_product=hypothetical protein | transcript_product=hypothetical protein | location=TGGT1_chrIV:1587042-1589369(+) | protein_length=213 | sequence_SO=chromosome | SO=protein_coding_gene | is_pseudo=false	[K].LETSDSTEAEIMAQR.[R]	1xTMTpro [N-Term]; 1xPhospho [S6(100)]	TGGT1_211630-t26_1-p1 1xPhospho [S25(100)]	7	High	1.77911e-06	9.56086e-05	1	1	TGGT1_211630-t26_1-p1	TGGT1_211630-t26_1-p1 [20-34]	0	2064.95	0.658	-0.6	1	62.4	94.8	57.46	79.71	102.2	95.9	27	40.6	210.2	233.8	42.7	39.5		High	0.0001044	1.128e-06	6.78
96232	TGGT1_232050	DnaJ domain-containing protein	transcript=TGGT1_232050-t26_1 | gene=TGGT1_232050 | organism=Toxoplasma_gondii_GT1 | gene_product=J domain-containing protein [Source:UniProtKB/TrEMBL;Acc:S7V2Q7] | transcript_product=DnaJ domain-containing protein | location=TGGT1_chrVIII:1780837-1792241(-) | protein_length=869 | sequence_SO=chromosome | SO=protein_coding_gene | is_pseudo=false	[R].SSPGPAGSPGEEAR.[K]	1xTMTpro [N-Term]; 1xPhospho [S8(100)]	TGGT1_232050-t26_1-p1 1xPhospho [S112(100)]	17	High	2.84114e-06	9.56086e-05	1	1	TGGT1_232050-t26_1-p1	TGGT1_232050-t26_1-p1 [105-118]	0	1682.77	1.101	0.14	1	72.7	66	9.08	19.45	NA	NA	68.2	77.5	NA	NA	75.8	57.5		High	7.761e-05	1.141e-06	4.93
27449	TGGT1_209100	PUB domain-containing protein	transcript=TGGT1_209100-t26_1 | gene=TGGT1_209100 | organism=Toxoplasma_gondii_GT1 | gene_product=PUB domain-containing protein [Source:UniProtKB/TrEMBL;Acc:S7VS99] | transcript_product=PUB domain-containing protein | location=TGGT1_chrIb:1054806-1062365(-) | protein_length=620 | sequence_SO=chromosome | SO=protein_coding_gene | is_pseudo=false	[R].EQLLETGGGEEVPLSPAVYALEELR.[Q]	1xTMTpro [N-Term]; 1xPhospho [S15(100)]	TGGT1_209100-t26_1-p1 1xPhospho [S340(100)]	1	High	2.14072e-08	9.56086e-05	1	1	TGGT1_209100-t26_1-p1	TGGT1_209100-t26_1-p1 [326-350]	0	3083.55	1.1	0.14	1	14.8	13.4	45.92	15.37	NA	NA	20.7	10.6	NA	NA	15	12.1		High	7.761e-05	5.868e-09	5.63
96223	TGGT1_203150	hypothetical protein	transcript=TGGT1_203150-t26_1 | gene=TGGT1_203150 | organism=Toxoplasma_gondii_GT1 | gene_product=hypothetical protein | transcript_product=hypothetical protein | location=TGGT1_chrVIIa:2636476-2642600(+) | protein_length=1797 | sequence_SO=chromosome | SO=protein_coding_gene | is_pseudo=false	[R].SSPGHPFQLSPR.[R]	1xTMTpro [N-Term]; 1xPhospho [S10(100)]	TGGT1_203150-t26_1-p1 1xPhospho [S390(100)]	2	High	0.000141817	9.56086e-05	1	1	TGGT1_203150-t26_1-p1	TGGT1_203150-t26_1-p1 [381-392]	0	1693.84	1.094	0.13	1	51.9	47.5	6.92	8.11	NA	NA	54.5	49.4	NA	NA	50.3	44.8		High	7.761e-05	8.088e-05	3.56
25489	TGGT1_228660	Sec7 domain-containing protein	transcript=TGGT1_228660-t26_1 | gene=TGGT1_228660 | organism=Toxoplasma_gondii_GT1 | gene_product=SEC7 domain-containing protein [Source:UniProtKB/TrEMBL;Acc:S7UXX0] | transcript_product=Sec7 domain-containing protein | location=TGGT1_chrX:159771-177015(-) | protein_length=3547 | sequence_SO=chromosome | SO=protein_coding_gene | is_pseudo=false	[R].EHSGEEMECEVK.[E]	1xOxidation [M7]; 1xMethylthio [C9]; 1xTMTpro [K12]; 1xTMTpro [N-Term]; 1xPhospho [S3(100)]	TGGT1_228660-t26_1-p1 1xMethylthio [C3060]; 1xPhospho [S3054(100)]	7	High	1.65255e-05	9.56086e-05	1	1	TGGT1_228660-t26_1-p1	TGGT1_228660-t26_1-p1 [3052-3063]	0	2156.92	1.065	0.09	1	32.9	30.9	20	24.77	22.1	34.7	35.7	31.2	35.8	29.4	19	32.4		High	0.0001044	9.88e-06	3.46
96183	TGGT1_224200	tRNA pseudouridine synthase	transcript=TGGT1_224200-t26_1 | gene=TGGT1_224200 | organism=Toxoplasma_gondii_GT1 | gene_product=PseudoU_synth_1 domain-containing protein [Source:UniProtKB/TrEMBL;Acc:S7UW42] | transcript_product=tRNA pseudouridine synthase | location=TGGT1_chrX:3153285-3160162(-) | protein_length=901 | sequence_SO=chromosome | SO=protein_coding_gene | is_pseudo=false	[R].SSPDAVLSGGRPPYAAPQSPPR.[Q]	1xTMTpro [N-Term]; 1xPhospho [S19(100)]	TGGT1_224200-t26_1-p1 1xPhospho [S33(100)]	3	High	1.34111e-05	9.56086e-05	1	1	TGGT1_224200-t26_1-p1	TGGT1_224200-t26_1-p1 [15-36]	0	2591.29	0.825	-0.28	1	56.3	68.3	40.92	38.49	41.6	38.5	76.1	88.9	39.8	52	91.5	89.5		High	7.761e-05	6.093e-06	4.53
54979	TGGT1_281440	hypothetical protein	transcript=TGGT1_281440-t26_1 | gene=TGGT1_281440 | organism=Toxoplasma_gondii_GT1 | gene_product=hypothetical protein | transcript_product=hypothetical protein | location=TGGT1_chrVIIa:4012076-4027711(+) | protein_length=3668 | sequence_SO=chromosome | SO=protein_coding_gene | is_pseudo=false	[K].LETGQASPSLASLEDGR.[S]	1xTMTpro [N-Term]; 1xPhospho [S7(100)]	TGGT1_281440-t26_1-p1 1xPhospho [S185(100)]	2	High	2.78625e-05	9.56086e-05	1	1	TGGT1_281440-t26_1-p1	TGGT1_281440-t26_1-p1 [179-195]	0	2115.03	1.065	0.09	1	25	23.5	16.66	35.37	32.1	26.7	22.4	23.5	22.8	40.2	24.2	18.9		High	0.0001044	1.647e-05	3.51
25515	TGGT1_242580	iron only hydrogenase large subunit, c-terminal domain-containing protein	transcript=TGGT1_242580-t26_1 | gene=TGGT1_242580 | organism=Toxoplasma_gondii_GT1 | gene_product=Iron only hydrogenase large subunit, c-terminal domain-containing protein [Source:UniProtKB/TrEMBL;Acc:S7USL3] | transcript_product=iron only hydrogenase large subunit, c-terminal domain-containing protein | location=TGGT1_chrVI:1988106-1991051(-) | protein_length=981 | sequence_SO=chromosome | SO=pr…	[R].EHTASPHADIR.[I]	1xTMTpro [N-Term]; 1xPhospho [S5(100)]	TGGT1_242580-t26_1-p1 1xPhospho [S743(100)]	3	High	2.31279e-05	9.56086e-05	1	1	TGGT1_242580-t26_1-p1	TGGT1_242580-t26_1-p1 [739-749]	0	1617.77	1.34	0.42	1	29.7	22.2	23.66	9.3	NA	NA	35.1	25.1	NA	NA	23.7	20.7		High	7.761e-05	1.1e-05	4.17
77780	TGGT1_311870	WD domain, G-beta repeat-containing protein	transcript=TGGT1_311870-t26_1 | gene=TGGT1_311870 | organism=Toxoplasma_gondii_GT1 | gene_product=WD_REPEATS_REGION domain-containing protein [Source:UniProtKB/TrEMBL;Acc:S7USV5] | transcript_product=WD domain, G-beta repeat-containing protein | location=TGGT1_chrXI:2297833-2305816(-) | protein_length=535 | sequence_SO=chromosome | SO=protein_coding_gene | is_pseudo=false	[K].RLDDPGAAGPPPTPHQPPK.[F]	1xTMTpro [K19]; 1xTMTpro [N-Term]; 1xPhospho [T13(100)]	TGGT1_311870-t26_1-p1 1xPhospho [T268(100)]	4	High	2.41722e-05	9.56086e-05	1	1	TGGT1_311870-t26_1-p1	TGGT1_311870-t26_1-p1 [256-274]	1	2636.38	0.948	-0.08	1	61.4	64.7	3.71	18.74	NA	NA	63	59.8	NA	NA	56.6	73.9		High	7.761e-05	1.155e-05	3.51
25521	TGGT1_290990	HEAT repeat-containing protein	transcript=TGGT1_290990-t26_1 | gene=TGGT1_290990 | organism=Toxoplasma_gondii_GT1 | gene_product=HEAT repeat-containing protein [Source:UniProtKB/TrEMBL;Acc:S7UPB3] | transcript_product=HEAT repeat-containing protein | location=TGGT1_chrIX:3821022-3829833(-) | protein_length=2505 | sequence_SO=chromosome | SO=protein_coding_gene | is_pseudo=false	[R].EHTGQLSDSEK.[S]	1xTMTpro [K11]; 1xTMTpro [N-Term]; 1xPhospho [S7(100)]	TGGT1_290990-t26_1-p1 1xPhospho [S1013(100)]	6	High	8.94192e-06	9.56086e-05	1	1	TGGT1_290990-t26_1-p1	TGGT1_290990-t26_1-p1 [1007-1017]	0	1918.94	1.154	0.21	1	90.5	78.4	54.74	52.18	141.8	156.8	57.7	49.8	141.3	118.4	51.9	48.5		High	0.0001044	5.43e-06	4.01
25488	TGGT1_228660	Sec7 domain-containing protein	transcript=TGGT1_228660-t26_1 | gene=TGGT1_228660 | organism=Toxoplasma_gondii_GT1 | gene_product=SEC7 domain-containing protein [Source:UniProtKB/TrEMBL;Acc:S7UXX0] | transcript_product=Sec7 domain-containing protein | location=TGGT1_chrX:159771-177015(-) | protein_length=3547 | sequence_SO=chromosome | SO=protein_coding_gene | is_pseudo=false	[R].EHSGEEMECEVK.[E]	1xMethylthio [C9]; 1xTMTpro [K12]; 1xTMTpro [N-Term]; 1xPhospho [S3(100)]	TGGT1_228660-t26_1-p1 1xMethylthio [C3060]; 1xPhospho [S3054(100)]	6	High	1.8573e-06	9.56086e-05	1	1	TGGT1_228660-t26_1-p1	TGGT1_228660-t26_1-p1 [3052-3063]	0	2140.92	1.157	0.21	1	72.7	62.8	26.22	30.61	92.7	90.9	58.2	57.5	76.9	93.5	51.3	50.8		High	7.761e-05	7.22e-07	5.22
77517	TGGT1_216750	Paf1/RNA polymerase II complex component LEO1	transcript=TGGT1_216750-t26_1 | gene=TGGT1_216750 | organism=Toxoplasma_gondii_GT1 | gene_product=Paf1/RNA polymerase II complex component LEO1 [Source:UniProtKB/TrEMBL;Acc:S7UM80] | transcript_product=Paf1/RNA polymerase II complex component LEO1 | location=TGGT1_chrXI:5836978-5843100(-) | protein_length=377 | sequence_SO=chromosome | SO=protein_coding_gene | is_pseudo=false	[R].RHSDDEEACEDDQEIQLPIQELPPSTK.[D]	1xMethylthio [C9]; 1xTMTpro [K27]; 1xTMTpro [N-Term]; 1xPhospho [S3(100)]	TGGT1_216750-t26_1-p1 1xMethylthio [C131]; 1xPhospho [S125(100)]	2	High	5.25826e-08	9.56086e-05	1	1	TGGT1_216750-t26_1-p1	TGGT1_216750-t26_1-p1 [123-149]	1	3856.79	0.992	-0.01	1	208.8	210.5	1.62	6.49	NA	NA	206.4	211.2	NA	NA	220.4	201		High	7.761e-05	1.546e-08	5.86
94175	TGGT1_289880	hypothetical protein	transcript=TGGT1_289880-t26_1 | gene=TGGT1_289880 | organism=Toxoplasma_gondii_GT1 | gene_product=hypothetical protein | transcript_product=hypothetical protein | location=TGGT1_chrIX:3301494-3313288(-) | protein_length=1326 | sequence_SO=chromosome | SO=protein_coding_gene | is_pseudo=false	[R].SRSFEELSPSELVAPSR.[V]	1xTMTpro [N-Term]; 2xPhospho [S1(100); S3(100)]	TGGT1_289880-t26_1-p1 2xPhospho [S172(100); S174(100)]	4	High	1.85884e-07	9.56086e-05	1	1	TGGT1_289880-t26_1-p1	TGGT1_289880-t26_1-p1 [172-188]	1	2355.1	0.915	-0.13	1	299.4	327.2	3.27	5.97	293.7	285.4	305.2	305.5	316.3	361.8	324.6	329.9		High	7.761e-05	6.027e-08	7.17
91927	TGGT1_311230	hypothetical protein	transcript=TGGT1_311230-t26_1 | gene=TGGT1_311230 | organism=Toxoplasma_gondii_GT1 | gene_product=hypothetical protein | transcript_product=hypothetical protein | location=TGGT1_chrXI:1844321-1862670(+) | protein_length=4603 | sequence_SO=chromosome | SO=protein_coding_gene | is_pseudo=false	[K].SPGSSDPSQGSPTSRPGEAETSCR.[R]	1xMethylthio [C23]; 1xTMTpro [N-Term]; 1xPhospho [S11(100)]	TGGT1_311230-t26_1-p1 1xMethylthio [C3210]; 1xPhospho [S3198(100)]	11	High	1.89689e-05	9.56086e-05	1	1	TGGT1_311230-t26_1-p1	TGGT1_311230-t26_1-p1 [3188-3211]	0	2807.19	1.364	0.45	1	77.7	57	9.22	26.29	85.5	83	72.8	71.1	70.3	66.6	48.8	39.1		High	7.761e-05	8.872e-06	3.51
52819	TGGT1_295650	hypothetical protein	transcript=TGGT1_295650-t26_1 | gene=TGGT1_295650 | organism=Toxoplasma_gondii_GT1 | gene_product=hypothetical protein | transcript_product=hypothetical protein | location=TGGT1_chrIa:1636242-1640551(-) | protein_length=683 | sequence_SO=chromosome | SO=protein_coding_gene | is_pseudo=false	[R].KVDPTQVETELGTSLEETEEEDREDEGDLSEEEDR.[S]	1xTMTpro [K1]; 1xTMTpro [N-Term]; 1xPhospho [S30(100)]	TGGT1_295650-t26_1-p1 1xPhospho [S589(100)]	1	High	7.9983e-05	9.56086e-05	1	1	TGGT1_295650-t26_1-p1	TGGT1_295650-t26_1-p1 [560-594]	2	4726.14	1.375	0.46	1	22.5	16.3	26.92	11.05	NA	NA	18.5	27.2	NA	NA	17.7	15.1		High	7.761e-05	4.261e-05	2.57
29582	TGGT1_224130	hypothetical protein	transcript=TGGT1_224130-t26_1 | gene=TGGT1_224130 | organism=Toxoplasma_gondii_GT1 | gene_product=RRM domain-containing protein [Source:UniProtKB/TrEMBL;Acc:A0A125YI44] | transcript_product=hypothetical protein | location=TGGT1_chrX:3217756-3218599(-) | protein_length=154 | sequence_SO=chromosome | SO=protein_coding_gene | is_pseudo=false	[K].ESWATSEGEGASSDVQSSEYSPEQSDDEPGSR.[-]	1xTMTpro [N-Term]; 2xPhospho [S21(100); S25(100)]	TGGT1_224130-t26_1-p1 2xPhospho [S143(100); S147(100)]	9	High	1.66819e-09	9.56086e-05	1	1	TGGT1_224130-t26_1-p1	TGGT1_224130-t26_1-p1 [123-154]	0	3854.5	1.254	0.33	1	8.6	6.9	10.68	14.92	NA	NA	8	9.3	NA	NA	7.7	6.2		High	7.761e-05	3.741e-10	7.26
52820	TGGT1_255300	hypothetical protein	transcript=TGGT1_255300-t26_1 | gene=TGGT1_255300 | organism=Toxoplasma_gondii_GT1 | gene_product=hypothetical protein | transcript_product=hypothetical protein | location=TGGT1_chrVIIb:4824891-4834235(+) | protein_length=2496 | sequence_SO=chromosome | SO=protein_coding_gene | is_pseudo=false	[R].KVDQAETGEETGSVGEETGPSGTDR.[R]	1xTMTpro [K1]; 1xTMTpro [N-Term]; 1xPhospho [S13(99.6)]	TGGT1_255300-t26_1-p1 1xPhospho [S2145(99.6)]	9	High	6.31225e-06	9.56086e-05	1	1	TGGT1_255300-t26_1-p1	TGGT1_255300-t26_1-p1 [2133-2157]	1	3224.51	1.341	0.42	1	34.8	25.9	28.16	13.6	NA	NA	28.4	42.6	NA	NA	28.6	23.6		High	0.0001044	3.865e-06	3.88
91931	TGGT1_203380	DnaJ domain-containing protein	transcript=TGGT1_203380-t26_1 | gene=TGGT1_203380 | organism=Toxoplasma_gondii_GT1 | gene_product=DnaJ domain-containing protein [Source:UniProtKB/TrEMBL;Acc:S7UUY7] | transcript_product=DnaJ domain-containing protein | location=TGGT1_chrVIIa:2427917-2435902(+) | protein_length=714 | sequence_SO=chromosome | SO=protein_coding_gene | is_pseudo=false	[R].SPGSSEEGASGRSSPHSAK.[E]	1xTMTpro [K19]; 1xTMTpro [N-Term]; 2xPhospho [S10(99.8); S]	TGGT1_203380-t26_1-p1 2xPhospho [S175(99.8); S]	3	High	1.75608e-05	9.56086e-05	1	1	TGGT1_203380-t26_1-p1	TGGT1_203380-t26_1-p1 [166-184]	1	2583.17	1.172	0.23	1	134.8	115	6.96	2.36	141.6	128.3	NA	NA	116.9	113.1	NA	NA		High	0.0001044	1.049e-05	4
91936	TGGT1_228120	hypothetical protein	transcript=TGGT1_228120-t26_1 | gene=TGGT1_228120 | organism=Toxoplasma_gondii_GT1 | gene_product=hypothetical protein | transcript_product=hypothetical protein | location=TGGT1_chrX:469350-486422(+) | protein_length=3946 | sequence_SO=chromosome | SO=protein_coding_gene | is_pseudo=false	[R].SPGVEHNSAAGER.[G]	1xTMTpro [N-Term]; 1xPhospho [S1(100)]	TGGT1_228120-t26_1-p1 1xPhospho [S3533(100)]	15	High	3.32992e-06	9.56086e-05	1	1	TGGT1_228120-t26_1-p1	TGGT1_228120-t26_1-p1 [3533-3545]	0	1694.78	1.236	0.31	1	55.3	44.7	20.13	33.8	51.7	39.1	63.6	59.1	37.4	28.5	62.7	53.4		High	0.0001044	2.075e-06	3.93
29556	TGGT1_202850	ATP-binding domain-containing protein	transcript=TGGT1_202850-t26_1 | gene=TGGT1_202850 | organism=Toxoplasma_gondii_GT1 | gene_product=Diphthami_syn_2 domain-containing protein [Source:UniProtKB/TrEMBL;Acc:S7WAM4] | transcript_product=ATP-binding domain-containing protein | location=TGGT1_chrVIIa:2880401-2888538(+) | protein_length=1916 | sequence_SO=chromosome | SO=protein_coding_gene | is_pseudo=false	[R].ESVQPQTPAGSAELTR.[S]	1xTMTpro [N-Term]; 1xPhospho [T7(100)]	TGGT1_202850-t26_1-p1 1xPhospho [T717(100)]	3	High	4.64265e-05	9.56086e-05	1	1	TGGT1_202850-t26_1-p1	TGGT1_202850-t26_1-p1 [711-726]	0	2055.01	0.886	-0.17	1	20.4	23	32.59	31.86	30.4	19.6	13.7	21.1	33.5	18.5	28.5	17.5		High	0.0001044	2.722e-05	3.11
91937	TGGT1_228120	hypothetical protein	transcript=TGGT1_228120-t26_1 | gene=TGGT1_228120 | organism=Toxoplasma_gondii_GT1 | gene_product=hypothetical protein | transcript_product=hypothetical protein | location=TGGT1_chrX:469350-486422(+) | protein_length=3946 | sequence_SO=chromosome | SO=protein_coding_gene | is_pseudo=false	[R].SPGVEHNSAAGER.[G]	1xTMTpro [N-Term]; 2xPhospho [S1(100); S8(100)]	TGGT1_228120-t26_1-p1 2xPhospho [S3533(100); S3540(100)]	13	High	5.36887e-06	9.56086e-05	1	1	TGGT1_228120-t26_1-p1	TGGT1_228120-t26_1-p1 [3533-3545]	0	1774.75	0.975	-0.04	1	110.4	113.3	29.25	9.46	156	137.4	88.7	88.4	121.1	118.2	108.5	97.8		High	7.761e-05	2.484e-06	5.47
91945	TGGT1_263140	SWI2/SNF2-containing protein RAD26	transcript=TGGT1_263140-t26_1 | gene=TGGT1_263140 | organism=Toxoplasma_gondii_GT1 | gene_product=SWI2/SNF2-containing protein RAD26 [Source:UniProtKB/TrEMBL;Acc:S7UXK9] | transcript_product=SWI2/SNF2-containing protein RAD26 | location=TGGT1_chrVIIb:738637-750864(-) | protein_length=1596 | sequence_SO=chromosome | SO=protein_coding_gene | is_pseudo=false	[R].SPGYGVEDHSGTGFDALVR.[G]	1xTMTpro [N-Term]; 1xPhospho [S1(100)]	TGGT1_263140-t26_1-p1 1xPhospho [S273(100)]	1	High	1.32748e-06	9.56086e-05	1	1	TGGT1_263140-t26_1-p1	TGGT1_263140-t26_1-p1 [273-291]	0	2348.09	1.035	0.05	1	71.9	69.5	8.28	8.86	NA	NA	76.2	67.8	NA	NA	74	65.2		High	7.761e-05	5.029e-07	4.93
52833	TGGT1_245570	origin recognition complex subunit 2 protein	transcript=TGGT1_245570-t26_1 | gene=TGGT1_245570 | organism=Toxoplasma_gondii_GT1 | gene_product=Origin recognition complex subunit 2 protein [Source:UniProtKB/TrEMBL;Acc:S7V192] | transcript_product=origin recognition complex subunit 2 protein | location=TGGT1_chrXII:2321928-2330622(-) | protein_length=884 | sequence_SO=chromosome | SO=protein_coding_gene | is_pseudo=false	[K].KVEETPEDSEDDTAAAVPLLTR.[R]	1xTMTpro [K1]; 1xTMTpro [N-Term]; 1xPhospho [T5(100)]	TGGT1_245570-t26_1-p1 1xPhospho [T497(100)]	2	High	4.59603e-07	9.56086e-05	1	1	TGGT1_245570-t26_1-p1	TGGT1_245570-t26_1-p1 [493-514]	1	3074.54	1.004	0.01	1	61.8	61.5	0.44	0.7	NA	NA	62	61.6	NA	NA	61.2	61.8		High	7.761e-05	1.601e-07	4.12
29532	TGGT1_278660	putative P-type ATPase4	transcript=TGGT1_278660-t26_1 | gene=TGGT1_278660 | organism=Toxoplasma_gondii_GT1 | gene_product=Cation_ATPase_N domain-containing protein [Source:UniProtKB/TrEMBL;Acc:S7UZZ0] | transcript_product=putative P-type ATPase4 | location=TGGT1_chrXII:5863040-5875230(+) | protein_length=1338 | sequence_SO=chromosome | SO=protein_coding_gene | is_pseudo=false	[R].ESTVGGSGTGHSQLGK.[S]	1xTMTpro [K16]; 1xTMTpro [N-Term]; 1xPhospho [S7(100)]	TGGT1_278660-t26_1-p1 1xPhospho [S88(100)]	8	High	7.68042e-05	9.56086e-05	1	1	TGGT1_278660-t26_1-p1	TGGT1_278660-t26_1-p1 [82-97]	0	2190.1	0.851	-0.23	1	181	212.6	7.02	10.64	171.9	202.1	179.1	182.9	179.1	207.6	231.6	217.7		High	7.761e-05	4.074e-05	3.62
91950	TGGT1_280610	signal recognition particle receptor alpha subunit	transcript=TGGT1_280610-t26_1 | gene=TGGT1_280610 | organism=Toxoplasma_gondii_GT1 | gene_product=SRP54 domain-containing protein [Source:UniProtKB/TrEMBL;Acc:S7UTQ2] | transcript_product=signal recognition particle receptor alpha subunit | location=TGGT1_chrVIIa:237626-244988(+) | protein_length=556 | sequence_SO=chromosome | SO=protein_coding_gene | is_pseudo=false	[K].SPHGELPNGDDAVAR.[M]	1xTMTpro [N-Term]; 1xPhospho [S1(100)]	TGGT1_280610-t26_1-p1 1xPhospho [S195(100)]	1	High	2.66182e-05	9.56086e-05	1	1	TGGT1_280610-t26_1-p1	TGGT1_280610-t26_1-p1 [195-209]	0	1918.9	1.334	0.42	1	12.3	9.3	26.27	26.85	NA	NA	10.2	14.9	NA	NA	11.2	7.6		High	7.761e-05	1.28e-05	3.99
91893	TGGT1_285500	hypothetical protein	transcript=TGGT1_285500-t26_1 | gene=TGGT1_285500 | organism=Toxoplasma_gondii_GT1 | gene_product=hypothetical protein | transcript_product=hypothetical protein | location=TGGT1_chrV:2225125-2233785(+) | protein_length=1899 | sequence_SO=chromosome | SO=protein_coding_gene | is_pseudo=false	[R].SPGPDVEHLGAGPPSASSPNHANSPR.[A]	1xTMTpro [N-Term]; 2xPhospho [S24(100); S]	TGGT1_285500-t26_1-p1 2xPhospho [S319(100); S]	4	High	2.11309e-06	9.56086e-05	1	1	TGGT1_285500-t26_1-p1	TGGT1_285500-t26_1-p1 [296-321]	0	2999.34	0.977	-0.03	1	7	7.2	14.35	33.05	NA	NA	7.8	6.4	NA	NA	5.7	9.1		High	7.761e-05	8.294e-07	4.52
52834	TGGT1_229490	tetratricopeptide repeat-containing protein	transcript=TGGT1_229490-t26_1 | gene=TGGT1_229490 | organism=Toxoplasma_gondii_GT1 | gene_product=TPR_REGION domain-containing protein [Source:UniProtKB/TrEMBL;Acc:S7V2L7] | transcript_product=tetratricopeptide repeat-containing protein | location=TGGT1_chrVIII:295732-301948(+) | protein_length=823 | sequence_SO=chromosome | SO=protein_coding_gene | is_pseudo=false	[R].KVEEVSDDEDRPAASSSSGER.[D]	1xTMTpro [K1]; 1xTMTpro [N-Term]; 1xPhospho [S6(100)]	TGGT1_229490-t26_1-p1 1xPhospho [S429(100)]	22	High	3.18453e-06	9.56086e-05	1	1	TGGT1_229490-t26_1-p1	TGGT1_229490-t26_1-p1 [424-444]	1	2938.39	1.111	0.15	1	419.6	377.7	22.83	28.46	491.5	514.8	320.9	358.2	487.6	480	288.1	297.2		High	7.761e-05	1.291e-06	5.29
29482	TGGT1_232080	hypothetical protein	transcript=TGGT1_232080-t26_1 | gene=TGGT1_232080 | organism=Toxoplasma_gondii_GT1 | gene_product=Chorein_N domain-containing protein [Source:UniProtKB/TrEMBL;Acc:S7WJ08] | transcript_product=hypothetical protein | location=TGGT1_chrVIII:1804634-1839298(-) | protein_length=10329 | sequence_SO=chromosome | SO=protein_coding_gene | is_pseudo=false	[R].ESTGADDDSENDAGVWR.[S]	1xTMTpro [N-Term]; 1xPhospho [S9(100)]	TGGT1_232080-t26_1-p1 1xPhospho [S7459(100)]	10	High	6.94667e-06	9.56086e-05	1	1	TGGT1_232080-t26_1-p1	TGGT1_232080-t26_1-p1 [7451-7467]	0	2207.9	1.22	0.29	1	12.6	10.3	35.7	47.92	15.5	17.6	10.2	7.8	19.8	11.8	6.8	9		High	7.761e-05	2.996e-06	4.81
78853	TGGT1_281380	hypothetical protein	transcript=TGGT1_281380-t26_1 | gene=TGGT1_281380 | organism=Toxoplasma_gondii_GT1 | gene_product=hypothetical protein | transcript_product=hypothetical protein | location=TGGT1_chrVIIa:3954053-3958576(+) | protein_length=1204 | sequence_SO=chromosome | SO=protein_coding_gene | is_pseudo=false	[R].RPDEASEEGAPEER.[R]	1xTMTpro [N-Term]; 1xPhospho [S6(100)]	TGGT1_281380-t26_1-p1 1xPhospho [S890(100)]	21	High	2.62728e-05	9.56086e-05	1	1	TGGT1_281380-t26_1-p1	TGGT1_281380-t26_1-p1 [885-898]	0	1955.87	1.14	0.19	1	139.6	122.4	4.31	8.6	139.7	142.4	139.5	129	122.4	122.5	137	111.1		High	0.0001044	1.554e-05	4.22
92019	TGGT1_320160B	hypothetical protein	transcript=TGGT1_320160B-t26_1 | gene=TGGT1_320160B | organism=Toxoplasma_gondii_GT1 | gene_product=hypothetical protein | transcript_product=hypothetical protein | location=TGGT1_chrIV:404778-406716(+) | protein_length=378 | sequence_SO=chromosome | SO=protein_coding_gene | is_pseudo=false	[K].SPLGVTHQR.[G]	1xTMTpro [N-Term]; 1xPhospho [S1(100)]	TGGT1_320160B-t26_1-p1 1xPhospho [S304(100)]	4	High	6.36898e-05	9.56086e-05	1	1	TGGT1_320160B-t26_1-p1	TGGT1_320160B-t26_1-p1 [304-312]	0	1378.72	0.821	-0.29	1	45.1	55	63.32	59.52	24.9	23.9	85	81.8	34.2	23	88.6	88.2		High	0.0001044	3.728e-05	3.36
52843	TGGT1_214270	putative translation initiation factor IF-2	transcript=TGGT1_214270-t26_1 | gene=TGGT1_214270 | organism=Toxoplasma_gondii_GT1 | gene_product=Tr-type G domain-containing protein [Source:UniProtKB/TrEMBL;Acc:S7UR99] | transcript_product=putative translation initiation factor IF-2 | location=TGGT1_chrX:6085732-6096115(-) | protein_length=1146 | sequence_SO=chromosome | SO=protein_coding_gene | is_pseudo=false	[R].KVESSSSADEK.[E]	2xTMTpro [K1; K11]; 1xTMTpro [N-Term]; 2xPhospho [S6(100); S7(100)]	TGGT1_214270-t26_1-p1 2xPhospho [S121(100); S122(100)]	9	High	2.75013e-05	9.56086e-05	1	1	TGGT1_214270-t26_1-p1	TGGT1_214270-t26_1-p1 [116-126]	1	2239.11	0.998	0	1	764	765.4	31.47	37.46	1037.8	992.3	574.5	588.2	1047.2	1113.1	559.5	545.7		High	0.0001044	1.625e-05	4.79
78851	TGGT1_242890	hypothetical protein	transcript=TGGT1_242890-t26_1 | gene=TGGT1_242890 | organism=Toxoplasma_gondii_GT1 | gene_product=hypothetical protein | transcript_product=hypothetical protein | location=TGGT1_chrVI:2291344-2310026(+) | protein_length=3144 | sequence_SO=chromosome | SO=protein_coding_gene | is_pseudo=false	[R].RPDASDCGPVSPDSSDSSPR.[F]	1xMethylthio [C7]; 1xTMTpro [N-Term]; 2xPhospho [S]	TGGT1_242890-t26_1-p1 1xMethylthio [C1050]	11	High	1.34614e-07	9.56086e-05	1	1	TGGT1_242890-t26_1-p1	TGGT1_242890-t26_1-p1 [1044-1063]	0	2541.99	0.888	-0.17	1	43.5	49	31.19	30.09	65.6	52.8	34.9	35.8	72.1	58.1	38.2	41.3		High	0.0001044	9.173e-08	5.62
29444	TGGT1_236970	SWI2/SNF2-containing PHD finger protein	transcript=TGGT1_236970-t26_1 | gene=TGGT1_236970 | organism=Toxoplasma_gondii_GT1 | gene_product=SWI2/SNF2-containing PHD finger protein [Source:UniProtKB/TrEMBL;Acc:S7VZH4] | transcript_product=SWI2/SNF2-containing PHD finger protein | location=TGGT1_chrX:5508193-5518721(+) | protein_length=2556 | sequence_SO=chromosome | SO=protein_coding_gene | is_pseudo=false	[R].ESSTGGSDVEVVGVGR.[T]	1xTMTpro [N-Term]; 1xPhospho [S7(100)]	TGGT1_236970-t26_1-p1 1xPhospho [S2311(100)]	6	High	2.0259e-07	9.56086e-05	1	1	TGGT1_236970-t26_1-p1	TGGT1_236970-t26_1-p1 [2305-2320]	0	1918.91	1.077	0.11	1	117.4	109	6.95	4.26	NA	NA	111.7	123.3	NA	NA	112.3	105.7		High	7.761e-05	6.622e-08	4.79
92030	TGGT1_315760	AP2 domain transcription factor AP2XI-4	transcript=TGGT1_315760-t26_1 | gene=TGGT1_315760 | organism=Toxoplasma_gondii_GT1 | gene_product=AP2/ERF domain-containing protein [Source:UniProtKB/TrEMBL;Acc:S7VUV5] | transcript_product=AP2 domain transcription factor AP2XI-4 | location=TGGT1_chrXI:4894138-4907734(+) | protein_length=3229 | sequence_SO=chromosome | SO=protein_coding_gene | is_pseudo=false	[R].SPLPLSTSHDLR.[R]	1xTMTpro [N-Term]; 1xPhospho [S1(100)]	TGGT1_315760-t26_1-p1 1xPhospho [S940(100)]	2	High	4.19451e-05	9.56086e-05	1	1	TGGT1_315760-t26_1-p1	TGGT1_315760-t26_1-p1 [940-951]	0	1706.88	1.088	0.12	1	11.4	10.5	0.14	17.14	NA	NA	11.4	11.4	NA	NA	11.9	9.3		High	7.761e-05	2.101e-05	2.9
92037	TGGT1_214970	putative DNA replication licensing factor	transcript=TGGT1_214970-t26_1 | gene=TGGT1_214970 | organism=Toxoplasma_gondii_GT1 | gene_product=DNA helicase [Source:UniProtKB/TrEMBL;Acc:S7W5U3] | transcript_product=putative DNA replication licensing factor | location=TGGT1_chrX:6526260-6536268(+) | protein_length=1049 | sequence_SO=chromosome | SO=protein_coding_gene | is_pseudo=false	[R].SPLRRTEEDSEADVNADGER.[G]	1xTMTpro [N-Term]; 1xPhospho [S/T]		4	High	8.95668e-06	9.56086e-05	1	1	TGGT1_214970-t26_1-p1	TGGT1_214970-t26_1-p1 [12-31]	2	2630.2	0.792	-0.34	1	7.5	9.5	19.56	30.04	NA	NA	6.6	8.7	NA	NA	11.8	7.7		High	7.761e-05	3.941e-06	3.65
92059	TGGT1_288570	hypothetical protein	transcript=TGGT1_288570-t26_1 | gene=TGGT1_288570 | organism=Toxoplasma_gondii_GT1 | gene_product=hypothetical protein | transcript_product=hypothetical protein | location=TGGT1_chrIX:2433882-2435903(-) | protein_length=417 | sequence_SO=chromosome | SO=protein_coding_gene | is_pseudo=false	[R].SPLTSQPTDSSQR.[R]	1xTMTpro [N-Term]; 1xPhospho [S1(100)]	TGGT1_288570-t26_1-p1 1xPhospho [S101(100)]	4	High	0.00012965	9.56086e-05	1	1	TGGT1_288570-t26_1-p1	TGGT1_288570-t26_1-p1 [101-113]	0	1787.85	1.065	0.09	1	55.3	52	4.72	1.67	NA	NA	53.5	57.2	NA	NA	51.4	52.6		High	7.761e-05	7.307e-05	3.57
29400	TGGT1_293630	hypothetical protein	transcript=TGGT1_293630-t26_1 | gene=TGGT1_293630 | organism=Toxoplasma_gondii_GT1 | gene_product=C2H2-type domain-containing protein [Source:UniProtKB/TrEMBL;Acc:S7UIR1] | transcript_product=hypothetical protein | location=TGGT1_chrIa:450631-460815(-) | protein_length=811 | sequence_SO=chromosome | SO=protein_coding_gene | is_pseudo=false	[R].ESSRNSMGDEGGAYAR.[G]	1xTMTpro [N-Term]; 2xPhospho [S6(100); S/Y]	TGGT1_293630-t26_1-p1 2xPhospho [S671(100); S/Y]	10	High	0.00012965	9.56086e-05	1	1	TGGT1_293630-t26_1-p1	TGGT1_293630-t26_1-p1 [666-681]	1	2150.85	1.014	0.02	1	111.3	109.8	63.27	56.56	60.4	60.7	204	210.3	64.9	65.2	194	185		High	7.761e-05	7.317e-05	4.3
78850	TGGT1_242890	hypothetical protein	transcript=TGGT1_242890-t26_1 | gene=TGGT1_242890 | organism=Toxoplasma_gondii_GT1 | gene_product=hypothetical protein | transcript_product=hypothetical protein | location=TGGT1_chrVI:2291344-2310026(+) | protein_length=3144 | sequence_SO=chromosome | SO=protein_coding_gene | is_pseudo=false	[R].RPDASDCGPVSPDSSDSSPR.[F]	1xMethylthio [C7]; 1xTMTpro [N-Term]; 1xPhospho [S]	TGGT1_242890-t26_1-p1 1xMethylthio [C1050]	13	High	7.15727e-09	9.56086e-05	1	1	TGGT1_242890-t26_1-p1	TGGT1_242890-t26_1-p1 [1044-1063]	0	2462.03	1.038	0.05	1	91.6	88.3	6.83	7.75	101.3	86.1	91.4	91.9	88.3	78.3	88.3	94.7		High	0.0001044	5.294e-09	5.76
92089	TGGT1_225890	hypothetical protein	transcript=TGGT1_225890-t26_1 | gene=TGGT1_225890 | organism=Toxoplasma_gondii_GT1 | gene_product=hypothetical protein | transcript_product=hypothetical protein | location=TGGT1_chrX:1864237-1871724(-) | protein_length=2111 | sequence_SO=chromosome | SO=protein_coding_gene | is_pseudo=false	[R].SPNSRPVDSNAAVPEK.[L]	1xTMTpro [K16]; 1xTMTpro [N-Term]; 1xPhospho [S1(99.5)]	TGGT1_225890-t26_1-p1 1xPhospho [S227(99.5)]	5	High	8.1617e-05	9.56086e-05	1	1	TGGT1_225890-t26_1-p1	TGGT1_225890-t26_1-p1 [227-242]	0	2356.22	1.28	0.36	1	264	206.2	65.94	65.87	148.5	133.5	469.4	544.9	103	111.8	402.6	380.3		High	7.761e-05	4.363e-05	3.63
92002	TGGT1_269940	zinc finger motif, C2HC5-type protein	transcript=TGGT1_269940-t26_1 | gene=TGGT1_269940 | organism=Toxoplasma_gondii_GT1 | gene_product=ASCH domain-containing protein [Source:UniProtKB/TrEMBL;Acc:S7V3Y0] | transcript_product=zinc finger motif, C2HC5-type protein | location=TGGT1_chrVIII:5507751-5513794(+) | protein_length=1191 | sequence_SO=chromosome | SO=protein_coding_gene | is_pseudo=false	[K].SPIDSEIEHTHK.[R]	1xTMTpro [K12]; 1xTMTpro [N-Term]; 1xPhospho [S1(100)]	TGGT1_269940-t26_1-p1 1xPhospho [S207(100)]	1	High	5.79943e-05	9.56086e-05	1	1	TGGT1_269940-t26_1-p1	TGGT1_269940-t26_1-p1 [207-218]	0	2081.06	1.213	0.28	1	82.9	68.3	10.28	1.76	NA	NA	89.2	77.1	NA	NA	67.5	69.2		High	7.761e-05	2.993e-05	3.2
52874	TGGT1_205130	hypothetical protein	transcript=TGGT1_205130-t26_1 | gene=TGGT1_205130 | organism=Toxoplasma_gondii_GT1 | gene_product=VOC domain-containing protein [Source:UniProtKB/TrEMBL;Acc:S7UUX9] | transcript_product=hypothetical protein | location=TGGT1_chrVIIa:1506588-1532655(+) | protein_length=4815 | sequence_SO=chromosome | SO=protein_coding_gene | is_pseudo=false	[R].KVSANDALETVER.[T]	1xTMTpro [K1]; 1xTMTpro [N-Term]; 1xPhospho [S3(100)]	TGGT1_205130-t26_1-p1 1xPhospho [S4389(100)]	4	High	0.000100452	9.56086e-05	1	1	TGGT1_205130-t26_1-p1	TGGT1_205130-t26_1-p1 [4387-4399]	1	2120.12	1.32	0.4	1	158.1	119.8	65.28	73.34	78.1	91.3	322.4	273.9	61	48.1	250.8	235.3		High	7.761e-05	5.487e-05	4.41
91892	TGGT1_285500	hypothetical protein	transcript=TGGT1_285500-t26_1 | gene=TGGT1_285500 | organism=Toxoplasma_gondii_GT1 | gene_product=hypothetical protein | transcript_product=hypothetical protein | location=TGGT1_chrV:2225125-2233785(+) | protein_length=1899 | sequence_SO=chromosome | SO=protein_coding_gene | is_pseudo=false	[R].SPGPDVEHLGAGPPSASSPNHANSPR.[A]	1xTMTpro [N-Term]; 1xPhospho [S24(100)]	TGGT1_285500-t26_1-p1 1xPhospho [S319(100)]	1	High	4.77893e-05	9.56086e-05	1	1	TGGT1_285500-t26_1-p1	TGGT1_285500-t26_1-p1 [296-321]	0	2919.37	0.753	-0.41	1	11.4	15.1	48.76	1.68	NA	NA	16.3	7.9	NA	NA	14.9	15.3		High	7.761e-05	2.423e-05	3.56
29774	TGGT1_224210	hypothetical protein	transcript=TGGT1_224210-t26_1 | gene=TGGT1_224210 | organism=Toxoplasma_gondii_GT1 | gene_product=C2 NT-type domain-containing protein [Source:UniProtKB/TrEMBL;Acc:S7WBT8] | transcript_product=hypothetical protein | location=TGGT1_chrX:3128859-3139913(-) | protein_length=1175 | sequence_SO=chromosome | SO=protein_coding_gene | is_pseudo=false	[R].ETDGPASSGESGSWTSGR.[R]	1xTMTpro [N-Term]; 1xPhospho [S7(99.6)]	TGGT1_224210-t26_1-p1 1xPhospho [S1153(99.6)]	6	High	1.29555e-05	9.56086e-05	1	1	TGGT1_224210-t26_1-p1	TGGT1_224210-t26_1-p1 [1147-1164]	0	2151.92	1.902	0.93	1	10.8	5.7	17.71	13.97	NA	NA	9.5	12.2	NA	NA	5.1	6.3		High	7.761e-05	5.87e-06	3.91
91803	TGGT1_243410	tetratricopeptide repeat-containing protein	transcript=TGGT1_243410-t26_1 | gene=TGGT1_243410 | organism=Toxoplasma_gondii_GT1 | gene_product=TPR_REGION domain-containing protein [Source:UniProtKB/TrEMBL;Acc:S7VTP0] | transcript_product=tetratricopeptide repeat-containing protein | location=TGGT1_chrVI:2533610-2536495(+) | protein_length=551 | sequence_SO=chromosome | SO=protein_coding_gene | is_pseudo=false	[R].SPFGAGGPQDPQR.[L]	1xTMTpro [N-Term]; 1xPhospho [S1(100)]	TGGT1_243410-t26_1-p1 1xPhospho [S371(100)]	3	High	0.000105763	9.56086e-05	1	1	TGGT1_243410-t26_1-p1	TGGT1_243410-t26_1-p1 [371-383]	0	1697.8	0.693	-0.53	1	16.3	23.6	22.94	6.37	NA	NA	19.2	13.9	NA	NA	24.7	22.5		High	7.761e-05	5.816e-05	3.52
29761	TGGT1_222400	hypothetical protein	transcript=TGGT1_222400-t26_1 | gene=TGGT1_222400 | organism=Toxoplasma_gondii_GT1 | gene_product=hypothetical protein | transcript_product=hypothetical protein | location=TGGT1_chrII:1096079-1099979(+) | protein_length=628 | sequence_SO=chromosome | SO=protein_coding_gene | is_pseudo=false	[R].ETDEADRDSAFDELRSEEDSEPR.[K]	1xTMTpro [N-Term]; 2xPhospho [S9(100); S16(100)]	TGGT1_222400-t26_1-p1 2xPhospho [S564(100); S571(100)]	26	High	9.01597e-06	9.56086e-05	1	1	TGGT1_222400-t26_1-p1	TGGT1_222400-t26_1-p1 [556-578]	2	3162.27	1.127	0.17	1	290	257.3	36.17	24.2	226.6	192.9	371.1	418	215.5	205.8	333.1	307.2		High	7.761e-05	3.971e-06	5.39
29760	TGGT1_222400	hypothetical protein	transcript=TGGT1_222400-t26_1 | gene=TGGT1_222400 | organism=Toxoplasma_gondii_GT1 | gene_product=hypothetical protein | transcript_product=hypothetical protein | location=TGGT1_chrII:1096079-1099979(+) | protein_length=628 | sequence_SO=chromosome | SO=protein_coding_gene | is_pseudo=false	[R].ETDEADRDSAFDELRSEEDSEPR.[K]	1xTMTpro [N-Term]; 1xPhospho [S16(100)]	TGGT1_222400-t26_1-p1 1xPhospho [S571(100)]	14	High	8.62323e-06	9.56086e-05	1	1	TGGT1_222400-t26_1-p1	TGGT1_222400-t26_1-p1 [556-578]	2	3082.31	1.06	0.08	1	231.1	218.1	6.14	1.04	NA	NA	221.2	241.3	NA	NA	216.5	219.7		High	7.761e-05	3.786e-06	4.16
29759	TGGT1_222400	hypothetical protein	transcript=TGGT1_222400-t26_1 | gene=TGGT1_222400 | organism=Toxoplasma_gondii_GT1 | gene_product=hypothetical protein | transcript_product=hypothetical protein | location=TGGT1_chrII:1096079-1099979(+) | protein_length=628 | sequence_SO=chromosome | SO=protein_coding_gene | is_pseudo=false	[R].ETDEADRDSAFDELR.[S]	1xTMTpro [N-Term]; 1xPhospho [S9(100)]	TGGT1_222400-t26_1-p1 1xPhospho [S564(100)]	15	High	2.22007e-05	9.56086e-05	1	1	TGGT1_222400-t26_1-p1	TGGT1_222400-t26_1-p1 [556-570]	1	2152.94	1.3	0.38	1	161.9	124.5	36.01	30.64	208.4	232.6	125.7	108.8	162.1	160.6	91	96.5		High	7.761e-05	1.052e-05	3.62
29755	TGGT1_226890	hypothetical protein	transcript=TGGT1_226890-t26_1 | gene=TGGT1_226890 | organism=Toxoplasma_gondii_GT1 | gene_product=ORC_WH_C domain-containing protein [Source:UniProtKB/TrEMBL;Acc:S7WD02] | transcript_product=hypothetical protein | location=TGGT1_chrX:1166477-1173027(+) | protein_length=2068 | sequence_SO=chromosome | SO=protein_coding_gene | is_pseudo=false	[K].ETDDMPNDDKDEQGSGAFSDEEGDETGDAR.[D]	1xOxidation [M5]; 1xTMTpro [K10]; 1xTMTpro [N-Term]; 1xPhospho [S19(100)]	TGGT1_226890-t26_1-p1 1xPhospho [S1403(100)]	11	High	2.34739e-07	9.56086e-05	1	1	TGGT1_226890-t26_1-p1	TGGT1_226890-t26_1-p1 [1385-1414]	1	3936.6	1.518	0.6	1	15.4	10.1	18.27	22.24	NA	NA	13.5	17.5	NA	NA	8.7	11.9		High	7.761e-05	7.76e-08	5.49
29754	TGGT1_226890	hypothetical protein	transcript=TGGT1_226890-t26_1 | gene=TGGT1_226890 | organism=Toxoplasma_gondii_GT1 | gene_product=ORC_WH_C domain-containing protein [Source:UniProtKB/TrEMBL;Acc:S7WD02] | transcript_product=hypothetical protein | location=TGGT1_chrX:1166477-1173027(+) | protein_length=2068 | sequence_SO=chromosome | SO=protein_coding_gene | is_pseudo=false	[K].ETDDMPNDDKDEQGSGAFSDEEGDETGDAR.[D]	1xTMTpro [K10]; 1xTMTpro [N-Term]; 1xPhospho [S19(100)]	TGGT1_226890-t26_1-p1 1xPhospho [S1403(100)]	10	High	2.33698e-08	9.56086e-05	1	1	TGGT1_226890-t26_1-p1	TGGT1_226890-t26_1-p1 [1385-1414]	1	3920.61	1.217	0.28	1	47.1	38.7	2.86	2.22	NA	NA	48.1	46.2	NA	NA	39.3	38.1		High	7.761e-05	6.445e-09	6.06
52777	TGGT1_221200A	CW-type Zinc Finger protein	transcript=TGGT1_221200A-t26_1 | gene=TGGT1_221200A | organism=Toxoplasma_gondii_GT1 | gene_product=CW-type Zinc Finger protein [Source:UniProtKB/TrEMBL;Acc:S7ULE9] | transcript_product=CW-type Zinc Finger protein | location=TGGT1_chrII:107067-114345(-) | protein_length=1525 | sequence_SO=chromosome | SO=protein_coding_gene | is_pseudo=false	[R].KTSLSEETLAK.[L]	2xTMTpro [K1; K11]; 1xTMTpro [N-Term]; 1xPhospho [S3(100)]	TGGT1_221200A-t26_1-p1 1xPhospho [S616(100)]	4	High	0.000115553	9.56086e-05	1	1	TGGT1_221200A-t26_1-p1	TGGT1_221200A-t26_1-p1 [614-624]	1	2199.25	1.032	0.05	1	207.8	201.3	35.83	22.84	265.3	275.6	162.7	126.4	230.2	259.6	175.9	158.3		High	7.761e-05	6.422e-05	3.66
29743	TGGT1_218960	AP2 domain transcription factor AP2XII-1	transcript=TGGT1_218960-t26_1 | gene=TGGT1_218960 | organism=Toxoplasma_gondii_GT1 | gene_product=AP2 domain transcription factor AP2XII-1 [Source:UniProtKB/TrEMBL;Acc:A0A125YNZ7] | transcript_product=AP2 domain transcription factor AP2XII-1 | location=TGGT1_chrXII:1115397-1126277(-) | protein_length=2283 | sequence_SO=chromosome | SO=protein_coding_gene | is_pseudo=false	[R].ETDAGAVSPDEVSR.[A]	1xTMTpro [N-Term]; 1xPhospho [S8(100)]	TGGT1_218960-t26_1-p1 1xPhospho [S1015(100)]	18	High	9.79063e-07	9.56086e-05	1	1	TGGT1_218960-t26_1-p1	TGGT1_218960-t26_1-p1 [1008-1021]	0	1816.83	0.946	-0.08	1	34.2	36.2	71.35	60.88	18.2	16	64.6	76.4	16.1	23	57.1	66		High	0.0001044	6.314e-07	5.25
91834	TGGT1_319710	kinesin motor domain-containing protein	transcript=TGGT1_319710-t26_1 | gene=TGGT1_319710 | organism=Toxoplasma_gondii_GT1 | gene_product=Kinesin motor domain-containing protein [Source:UniProtKB/TrEMBL;Acc:S7UJD1] | transcript_product=kinesin motor domain-containing protein | location=TGGT1_chrIV:713669-720540(+) | protein_length=1316 | sequence_SO=chromosome | SO=protein_coding_gene | is_pseudo=false	[R].SPGALESPLSPASEETER.[L]	1xTMTpro [N-Term]; 1xPhospho [S10(100)]	TGGT1_319710-t26_1-p1 1xPhospho [S655(100)]	2	High	9.70996e-07	9.56086e-05	1	1	TGGT1_319710-t26_1-p1	TGGT1_319710-t26_1-p1 [646-663]	0	2241.06	1.348	0.43	1	56.6	42	3.45	7.55	NA	NA	55.2	58	NA	NA	39.8	44.3		High	7.761e-05	3.584e-07	5.02
78881	TGGT1_225230	hypothetical protein	transcript=TGGT1_225230-t26_1 | gene=TGGT1_225230 | organism=Toxoplasma_gondii_GT1 | gene_product=hypothetical protein | transcript_product=hypothetical protein | location=TGGT1_chrX:2296184-2298591(-) | protein_length=744 | sequence_SO=chromosome | SO=protein_coding_gene | is_pseudo=false	[K].RPEEACVSDVDSGPPPK.[K]	1xMethylthio [C6]; 1xTMTpro [K17]; 1xTMTpro [N-Term]; 1xPhospho [S8(100)]	TGGT1_225230-t26_1-p1 1xMethylthio [C18]; 1xPhospho [S20(100)]	2	High	4.55388e-05	9.56086e-05	1	1	TGGT1_225230-t26_1-p1	TGGT1_225230-t26_1-p1 [13-29]	0	2517.2	1.023	0.03	1	60.3	59	24.86	15.98	49.8	47.1	73	76.6	57.7	58.6	59.3	78.8		High	0.0001044	2.671e-05	3.2
91835	TGGT1_247040	hypothetical protein	transcript=TGGT1_247040-t26_1 | gene=TGGT1_247040 | organism=Toxoplasma_gondii_GT1 | gene_product=hypothetical protein | transcript_product=hypothetical protein | location=TGGT1_chrXII:3051933-3058222(-) | protein_length=1140 | sequence_SO=chromosome | SO=protein_coding_gene | is_pseudo=false	[K].SPGAQTPSQQLEVDDIAR.[M]	1xTMTpro [N-Term]; 1xPhospho [T6(100)]	TGGT1_247040-t26_1-p1 1xPhospho [T609(100)]	2	High	1.00692e-05	9.56086e-05	1	1	TGGT1_247040-t26_1-p1	TGGT1_247040-t26_1-p1 [604-621]	0	2296.11	1.137	0.19	1	21.6	19	6.82	16.42	22.5	23.1	20	20.7	18.5	14.6	22	19.4		High	7.761e-05	4.472e-06	4.6
78866	TGGT1_228120	hypothetical protein	transcript=TGGT1_228120-t26_1 | gene=TGGT1_228120 | organism=Toxoplasma_gondii_GT1 | gene_product=hypothetical protein | transcript_product=hypothetical protein | location=TGGT1_chrX:469350-486422(+) | protein_length=3946 | sequence_SO=chromosome | SO=protein_coding_gene | is_pseudo=false	[R].RPDSPASFMEGEDPDTPR.[S]	1xOxidation [M9]; 1xTMTpro [N-Term]; 1xPhospho [S4(100)]	TGGT1_228120-t26_1-p1 1xPhospho [S101(100)]	10	High	1.6283e-05	9.56086e-05	1	1	TGGT1_228120-t26_1-p1	TGGT1_228120-t26_1-p1 [98-115]	0	2404.04	0.891	-0.17	1	73.8	82.9	66.74	42.62	31.9	41.9	130	142.9	61.4	44.7	111.8	114.7		High	0.0001044	9.741e-06	2.74
29694	TGGT1_228120	hypothetical protein	transcript=TGGT1_228120-t26_1 | gene=TGGT1_228120 | organism=Toxoplasma_gondii_GT1 | gene_product=hypothetical protein | transcript_product=hypothetical protein | location=TGGT1_chrX:469350-486422(+) | protein_length=3946 | sequence_SO=chromosome | SO=protein_coding_gene | is_pseudo=false	[K].ETASGAATPSLGSR.[K]	1xTMTpro [N-Term]; 1xPhospho [T8(100)]	TGGT1_228120-t26_1-p1 1xPhospho [T494(100)]	4	High	4.10738e-05	9.56086e-05	1	1	TGGT1_228120-t26_1-p1	TGGT1_228120-t26_1-p1 [487-500]	0	1688.82	1.033	0.05	1	21	20.4	16.46	25.01	17	21.2	20.9	25.5	20.7	27.8	15.1	20		High	7.761e-05	2.052e-05	4.09
52818	TGGT1_235690	hypothetical protein	transcript=TGGT1_235690-t26_1 | gene=TGGT1_235690 | organism=Toxoplasma_gondii_GT1 | gene_product=hypothetical protein | transcript_product=hypothetical protein | location=TGGT1_chrX:4951294-4952345(+) | protein_length=238 | sequence_SO=chromosome | SO=protein_coding_gene | is_pseudo=false	[R].KVDPPTPAVAASEPK.[E]	2xTMTpro [K1; K15]; 1xTMTpro [N-Term]; 1xPhospho [S12(100)]	TGGT1_235690-t26_1-p1 1xPhospho [S215(100)]	2	High	0.000142632	9.56086e-05	1	1	TGGT1_235690-t26_1-p1	TGGT1_235690-t26_1-p1 [204-218]	1	2499.4	0.911	-0.13	1	45.6	50	9.09	2.59	NA	NA	42.7	48.6	NA	NA	49.1	51		High	7.761e-05	8.15e-05	2.59
91848	TGGT1_291620	hypothetical protein	transcript=TGGT1_291620-t26_1 | gene=TGGT1_291620 | organism=Toxoplasma_gondii_GT1 | gene_product=hypothetical protein | transcript_product=hypothetical protein | location=TGGT1_chrIX:4099622-4107729(+) | protein_length=1497 | sequence_SO=chromosome | SO=protein_coding_gene | is_pseudo=false	[R].SPGEAASRPER.[T]	1xTMTpro [N-Term]; 1xPhospho [S1(100)]	TGGT1_291620-t26_1-p1 1xPhospho [S672(100)]	13	High	3.42043e-05	9.56086e-05	1	1	TGGT1_291620-t26_1-p1	TGGT1_291620-t26_1-p1 [672-682]	0	1540.74	1.275	0.35	1	197.5	154.9	7.18	15.79	215	182	192	203.1	166	196.8	144.5	141.2		High	7.761e-05	1.681e-05	3.15
91873	TGGT1_270010	hypothetical protein	transcript=TGGT1_270010-t26_1 | gene=TGGT1_270010 | organism=Toxoplasma_gondii_GT1 | gene_product=hypothetical protein | transcript_product=hypothetical protein | location=TGGT1_chrVIII:5449261-5457417(-) | protein_length=556 | sequence_SO=chromosome | SO=protein_coding_gene | is_pseudo=false	[R].SPGHPAVVAPNR.[R]	1xTMTpro [N-Term]; 1xPhospho [S1(100)]	TGGT1_270010-t26_1-p1 1xPhospho [S522(100)]	4	High	1.93459e-05	9.56086e-05	1	1	TGGT1_270010-t26_1-p1	TGGT1_270010-t26_1-p1 [522-533]	0	1585.82	1.002	0	1	40.2	40.1	37.62	47.35	33.6	20.7	53	48	34.8	20.1	46.3	67.4		High	7.761e-05	9.06e-06	3.89
52807	TGGT1_206590	calcium-dependent protein kinase CDPK2A	transcript=TGGT1_206590-t26_1 | gene=TGGT1_206590 | organism=Toxoplasma_gondii_GT1 | gene_product=Calcium-dependent protein kinase CDPK2A [Source:UniProtKB/TrEMBL;Acc:S7W2U0] | transcript_product=calcium-dependent protein kinase CDPK2A | location=TGGT1_chrVIIa:775466-782202(-) | protein_length=786 | sequence_SO=chromosome | SO=protein_coding_gene | is_pseudo=false	[R].KTVNAAAVASPETR.[R]	1xTMTpro [K1]; 1xTMTpro [N-Term]; 1xPhospho [T2(100)]	TGGT1_206590-t26_1-p1 1xPhospho [T730(100)]	1	High	1.64443e-05	9.56086e-05	1	1	TGGT1_206590-t26_1-p1	TGGT1_206590-t26_1-p1 [729-742]	1	2103.15	1.012	0.02	1	27.8	27.5	10.25	3.98	NA	NA	25.9	29.9	NA	NA	26.7	28.3		High	7.761e-05	7.604e-06	4
29659	TGGT1_263610	hypothetical protein	transcript=TGGT1_263610-t26_1 | gene=TGGT1_263610 | organism=Toxoplasma_gondii_GT1 | gene_product=hypothetical protein | transcript_product=hypothetical protein | location=TGGT1_chrVIIb:406014-425103(+) | protein_length=4526 | sequence_SO=chromosome | SO=protein_coding_gene | is_pseudo=false	[R].ETAHAVPETSEEEADETSNPPLSEK.[R]	1xTMTpro [K25]; 1xTMTpro [N-Term]; 2xPhospho [T9(97.5); S10(97.5)]	TGGT1_263610-t26_1-p1 2xPhospho [T1777(97.5); S1778(97.5)]	1	High	0.00012517	9.56086e-05	1	1	TGGT1_263610-t26_1-p1	TGGT1_263610-t26_1-p1 [1769-1793]	0	3465.55	1.345	0.43	1	16.4	12.2	1.78	34.42	NA	NA	16.2	16.6	NA	NA	9.5	15.6		High	7.761e-05	7.025e-05	2.64
29656	TGGT1_267100	protein phosphatase 2C domain-containing protein	transcript=TGGT1_267100-t26_1 | gene=TGGT1_267100 | organism=Toxoplasma_gondii_GT1 | gene_product=PPM-type phosphatase domain-containing protein [Source:UniProtKB/TrEMBL;Acc:S7VVP7] | transcript_product=protein phosphatase 2C domain-containing protein | location=TGGT1_chrIX:612107-616900(-) | protein_length=909 | sequence_SO=chromosome | SO=protein_coding_gene | is_pseudo=false	[R].ETAHAGSLQPSR.[A]	1xTMTpro [N-Term]; 1xPhospho [S7(100)]	TGGT1_267100-t26_1-p1 1xPhospho [S549(100)]	5	High	9.10873e-05	9.56086e-05	1	1	TGGT1_267100-t26_1-p1	TGGT1_267100-t26_1-p1 [543-554]	0	1637.8	0.69	-0.53	1	16.3	23.6	15.67	27.76	14.5	20.6	16.9	15.6	26.2	14	21.2	27.8		High	0.0001044	5.35e-05	3.28
91886	TGGT1_213060	WD domain, G-beta repeat-containing protein	transcript=TGGT1_213060-t26_1 | gene=TGGT1_213060 | organism=Toxoplasma_gondii_GT1 | gene_product=WD_REPEATS_REGION domain-containing protein [Source:UniProtKB/TrEMBL;Acc:S7UP51] | transcript_product=WD domain, G-beta repeat-containing protein | location=TGGT1_chrV:694020-707306(+) | protein_length=3089 | sequence_SO=chromosome | SO=protein_coding_gene | is_pseudo=false	[R].SPGMVLSGVNPQR.[S]	1xOxidation [M4]; 1xTMTpro [N-Term]; 1xPhospho [S1(100)]	TGGT1_213060-t26_1-p1 1xPhospho [S2127(100)]	1	High	6.78456e-05	9.56086e-05	1	1	TGGT1_213060-t26_1-p1	TGGT1_213060-t26_1-p1 [2127-2139]	0	1741.86	1.038	0.05	1	38.2	36.8	16.97	1.58	NA	NA	33.9	43.1	NA	NA	36.4	37.2		High	7.761e-05	3.554e-05	3.76
91887	TGGT1_308860	hypothetical protein	transcript=TGGT1_308860-t26_1 | gene=TGGT1_308860 | organism=Toxoplasma_gondii_GT1 | gene_product=hypothetical protein | transcript_product=hypothetical protein | location=TGGT1_chrXI:267813-271388(-) | protein_length=654 | sequence_SO=chromosome | SO=protein_coding_gene | is_pseudo=false	[K].SPGNLSPAAVAAGK.[A]	1xTMTpro [K14]; 1xTMTpro [N-Term]; 2xPhospho [S1(100); S6(100)]	TGGT1_308860-t26_1-p1 2xPhospho [S635(100); S640(100)]	1	High	4.60546e-05	9.56086e-05	1	1	TGGT1_308860-t26_1-p1	TGGT1_308860-t26_1-p1 [635-648]	0	2008.02	1.202	0.26	1	94.1	78.3	15.11	3.73	84.5	104.7	NA	NA	80.4	76.3	NA	NA		High	0.0001044	2.7e-05	4.42
78865	TGGT1_228120	hypothetical protein	transcript=TGGT1_228120-t26_1 | gene=TGGT1_228120 | organism=Toxoplasma_gondii_GT1 | gene_product=hypothetical protein | transcript_product=hypothetical protein | location=TGGT1_chrX:469350-486422(+) | protein_length=3946 | sequence_SO=chromosome | SO=protein_coding_gene | is_pseudo=false	[R].RPDSPASFMEGEDPDTPR.[S]	1xTMTpro [N-Term]; 1xPhospho [S4(100)]	TGGT1_228120-t26_1-p1 1xPhospho [S101(100)]	6	High	6.89381e-07	9.56086e-05	1	1	TGGT1_228120-t26_1-p1	TGGT1_228120-t26_1-p1 [98-115]	0	2388.05	1.245	0.32	1	233.3	187.4	38.42	41.76	344.7	321.2	165.3	169.4	253.9	304.5	138.3	130.1		High	7.761e-05	2.48e-07	5.82
91889	TGGT1_289710	AP2 domain transcription factor AP2IX-5	transcript=TGGT1_289710-t26_1 | gene=TGGT1_289710 | organism=Toxoplasma_gondii_GT1 | gene_product=AP2 domain transcription factor AP2IX-5 [Source:UniProtKB/TrEMBL;Acc:S7VXQ6] | transcript_product=AP2 domain transcription factor AP2IX-5 | location=TGGT1_chrIX:3197843-3204697(+) | protein_length=2284 | sequence_SO=chromosome | SO=protein_coding_gene | is_pseudo=false	[R].SPGNSEGAPGSDHKK.[R]	2xTMTpro [K14; K15]; 1xTMTpro [N-Term]; 1xPhospho [S11(100)]	TGGT1_289710-t26_1-p1 1xPhospho [S1071(100)]	1	High	5.24464e-05	9.56086e-05	1	1	TGGT1_289710-t26_1-p1	TGGT1_289710-t26_1-p1 [1061-1075]	1	2460.27	0.909	-0.14	1	14.8	16.3	23.99	15.51	NA	NA	12.5	17.6	NA	NA	14.6	18.2		High	7.761e-05	2.681e-05	3.61
91864	TGGT1_319850	splicing factor U2AF family SnRNP auxilary factor large subunit, RRM domain-containing protein	transcript=TGGT1_319850-t26_1 | gene=TGGT1_319850 | organism=Toxoplasma_gondii_GT1 | gene_product=RRM domain-containing protein [Source:UniProtKB/TrEMBL;Acc:S7UK80] | transcript_product=splicing factor U2AF family SnRNP auxilary factor large subunit, RRM domain-containing protein | location=TGGT1_chrIV:689661-691811(+) | protein_length=495 | sequence_SO=chromosome | SO=protein_coding_gene | is_ps…	[R].SPGGGGAAGGGK.[G]	1xTMTpro [K12]; 1xTMTpro [N-Term]; 1xPhospho [S1(100)]	TGGT1_319850-t26_1-p1 1xPhospho [S167(100)]	3	High	7.16801e-06	9.56086e-05	1	1	TGGT1_319850-t26_1-p1	TGGT1_319850-t26_1-p1 [167-178]	0	1560.8	1.53	0.61	1	39.9	26.1	48.93	71.89	26.3	23.4	60.4	62.3	13.4	10.9	50.5	53.6		High	7.761e-05	3.098e-06	4.05
78899	TGGT1_313270	hypothetical protein	transcript=TGGT1_313270-t26_1 | gene=TGGT1_313270 | organism=Toxoplasma_gondii_GT1 | gene_product=hypothetical protein | transcript_product=hypothetical protein | location=TGGT1_chrXI:3183953-3196338(+) | protein_length=2799 | sequence_SO=chromosome | SO=protein_coding_gene | is_pseudo=false	[R].RPESPAEVEGGSQR.[Q]	1xTMTpro [N-Term]; 1xPhospho [S4(100)]	TGGT1_313270-t26_1-p1 1xPhospho [S2295(100)]	32	High	1.63903e-05	9.56086e-05	1	1	TGGT1_313270-t26_1-p1	TGGT1_313270-t26_1-p1 [2292-2305]	0	1882.9	1.068	0.1	1	294.5	275.7	12.54	7.28	253.2	278.6	337.9	311.3	269.2	280.1	271.4	313.8		High	0.0001044	9.791e-06	3.6
78832	TGGT1_254090	hypothetical protein	transcript=TGGT1_254090-t26_1 | gene=TGGT1_254090 | organism=Toxoplasma_gondii_GT1 | gene_product=Cytochrome b5 heme-binding domain-containing protein [Source:UniProtKB/TrEMBL;Acc:S7VVH1] | transcript_product=hypothetical protein | location=TGGT1_chrIII:1424689-1426827(-) | protein_length=712 | sequence_SO=chromosome | SO=protein_coding_gene | is_pseudo=false	[R].RPASTPMLGCGVIGGSSDSTSSTTR.[G]	1xMethylthio [C10]; 1xTMTpro [N-Term]; 1xPhospho [S4(99.6)]	TGGT1_254090-t26_1-p1 1xMethylthio [C515]; 1xPhospho [S509(99.6)]	1	High	4.23336e-08	9.56086e-05	1	1	TGGT1_254090-t26_1-p1	TGGT1_254090-t26_1-p1 [506-530]	0	2855.31	1.307	0.39	1	49.6	38	14.32	2.44	NA	NA	44.8	54.9	NA	NA	38.6	37.3		High	7.761e-05	1.224e-08	6.64
29108	TGGT1_225690	hypothetical protein	transcript=TGGT1_225690-t26_1 | gene=TGGT1_225690 | organism=Toxoplasma_gondii_GT1 | gene_product=hypothetical protein | transcript_product=hypothetical protein | location=TGGT1_chrX:2025685-2031135(+) | protein_length=1816 | sequence_SO=chromosome | SO=protein_coding_gene | is_pseudo=false	[R].ESPLLSPPSAQEGDTAYEDGFPVDDGLEEEQR.[Q]	1xTMTpro [N-Term]; 1xPhospho [S6(100)]	TGGT1_225690-t26_1-p1 1xPhospho [S1607(100)]	3	High	6.38853e-07	9.56086e-05	1	1	TGGT1_225690-t26_1-p1	TGGT1_225690-t26_1-p1 [1602-1633]	0	3861.72	0.764	-0.39	1	16.8	22.1	53.48	36.84	19.5	33.8	9.8	14.5	39.4	25.1	19.4	19.2		High	7.761e-05	2.282e-07	5.73
29105	TGGT1_208010	hypothetical protein	transcript=TGGT1_208010-t26_1 | gene=TGGT1_208010 | organism=Toxoplasma_gondii_GT1 | gene_product=hypothetical protein | transcript_product=hypothetical protein | location=TGGT1_chrIb:526454-530738(+) | protein_length=472 | sequence_SO=chromosome | SO=protein_coding_gene | is_pseudo=false	[R].ESPHTDDEEPDPR.[A]	1xTMTpro [N-Term]; 1xPhospho [T5(100)]	TGGT1_208010-t26_1-p1 1xPhospho [T267(100)]	23	High	8.45419e-06	9.56086e-05	1	1	TGGT1_208010-t26_1-p1	TGGT1_208010-t26_1-p1 [263-275]	0	1907.8	1.135	0.18	1	218.8	192.8	33.78	25.58	289.7	306	161.6	165.3	236.4	245.5	157.3	150.4		High	7.761e-05	3.706e-06	5.05
29099	TGGT1_202520	hypothetical protein	transcript=TGGT1_202520-t26_1 | gene=TGGT1_202520 | organism=Toxoplasma_gondii_GT1 | gene_product=hypothetical protein | transcript_product=hypothetical protein | location=TGGT1_chrVIIa:3160505-3164139(+) | protein_length=989 | sequence_SO=chromosome | SO=protein_coding_gene | is_pseudo=false	[R].ESPGLSYDSDDSSR.[K]	1xTMTpro [N-Term]; 1xPhospho [S9(100)]	TGGT1_202520-t26_1-p1 1xPhospho [S425(100)]	5	High	0.000111482	9.56086e-05	1	1	TGGT1_202520-t26_1-p1	TGGT1_202520-t26_1-p1 [417-430]	0	1898.8	1.313	0.39	1	21.7	16.5	24.94	21.43	27.5	14.9	23.6	20	17.3	14.2	15.8	22.9		High	7.761e-05	6.173e-05	3
29042	TGGT1_278870	myosin F	transcript=TGGT1_278870-t26_1 | gene=TGGT1_278870 | organism=Toxoplasma_gondii_GT1 | gene_product=Myosin F [Source:UniProtKB/TrEMBL;Acc:S7UZI5] | transcript_product=myosin F | location=TGGT1_chrXII:5709485-5725053(+) | protein_length=1953 | sequence_SO=chromosome | SO=protein_coding_gene | is_pseudo=false	[K].ESLTVGSSTPTTPQMTFGTHK.[R]	1xOxidation [M15]; 1xTMTpro [K21]; 1xTMTpro [N-Term]; 1xPhospho [T9(99.6)]	TGGT1_278870-t26_1-p1 1xPhospho [T1081(99.6)]	3	High	1.01266e-07	9.56086e-05	1	1	TGGT1_278870-t26_1-p1	TGGT1_278870-t26_1-p1 [1073-1093]	0	2911.44	1.531	0.61	1	41.2	26.9	20.46	25.57	26.7	39.7	43.4	42.8	19.7	22.3	32.5	33		High	7.761e-05	3.136e-08	5.15
29041	TGGT1_278870	myosin F	transcript=TGGT1_278870-t26_1 | gene=TGGT1_278870 | organism=Toxoplasma_gondii_GT1 | gene_product=Myosin F [Source:UniProtKB/TrEMBL;Acc:S7UZI5] | transcript_product=myosin F | location=TGGT1_chrXII:5709485-5725053(+) | protein_length=1953 | sequence_SO=chromosome | SO=protein_coding_gene | is_pseudo=false	[K].ESLTVGSSTPTTPQMTFGTHK.[R]	1xTMTpro [K21]; 1xTMTpro [N-Term]; 1xPhospho [T9(100)]	TGGT1_278870-t26_1-p1 1xPhospho [T1081(100)]	3	High	3.13394e-09	9.56086e-05	1	1	TGGT1_278870-t26_1-p1	TGGT1_278870-t26_1-p1 [1073-1093]	0	2895.45	1.46	0.55	1	79.9	54.7	5.66	47.37	77.3	74.3	83.9	82.6	50	112.3	43.1	59.9		High	7.761e-05	7.384e-10	6.88
78782	TGGT1_305590	ABC transporter transmembrane region domain-containing protein	transcript=TGGT1_305590-t26_1 | gene=TGGT1_305590 | organism=Toxoplasma_gondii_GT1 | gene_product=ABC transporter transmembrane region domain-containing protein [Source:UniProtKB/TrEMBL;Acc:A0A125YP76] | transcript_product=ABC transporter transmembrane region domain-containing protein | location=TGGT1_chrIX:5262343-5272888(+) | protein_length=1883 | sequence_SO=chromosome | SO=protein_coding_gene…	[K].RPAAPGVSTPR.[R]	1xTMTpro [N-Term]; 1xPhospho [T9(99.6)]	TGGT1_305590-t26_1-p1 1xPhospho [T480(99.6)]	6	High	6.5426e-05	9.56086e-05	1	1	TGGT1_305590-t26_1-p1	TGGT1_305590-t26_1-p1 [472-482]	0	1492.8	0.975	-0.04	1	129.7	132.9	67.72	67.98	63.4	73.1	230	278.3	61.5	72.5	243.9	268.9		High	7.761e-05	3.416e-05	4.24
28959	TGGT1_276180	histone acetyltransferase TAF1/250	transcript=TGGT1_276180-t26_1 | gene=TGGT1_276180 | organism=Toxoplasma_gondii_GT1 | gene_product=Bromo domain-containing protein [Source:UniProtKB/TrEMBL;Acc:S7W2P2] | transcript_product=histone acetyltransferase TAF1/250 | location=TGGT1_chrIII:62352-79233(+) | protein_length=2775 | sequence_SO=chromosome | SO=protein_coding_gene | is_pseudo=false	[R].ESLEEEEERTQDEEDEEEER.[W]	1xTMTpro [N-Term]; 1xPhospho [T10(100)]	TGGT1_276180-t26_1-p1 1xPhospho [T2614(100)]	7	High	3.48771e-05	9.56086e-05	1	1	TGGT1_276180-t26_1-p1	TGGT1_276180-t26_1-p1 [2605-2624]	1	2923.18	1.276	0.35	1	17	13.3	47.4	67.42	18	29.5	16.1	8.8	28.1	24.4	6.7	7.3		High	7.761e-05	1.717e-05	3.7
92587	TGGT1_250850	putative CMGC kinase	transcript=TGGT1_250850-t26_1 | gene=TGGT1_250850 | organism=Toxoplasma_gondii_GT1 | gene_product=Protein kinase domain-containing protein [Source:UniProtKB/TrEMBL;Acc:S7W8T2] | transcript_product=putative CMGC kinase | location=TGGT1_chrXII:5203873-5211981(-) | protein_length=2682 | sequence_SO=chromosome | SO=protein_coding_gene | is_pseudo=false	[K].SPSTAELEPHRESPWK.[S]	1xTMTpro [K16]; 1xTMTpro [N-Term]; 1xPhospho [S13(100)]	TGGT1_250850-t26_1-p1 1xPhospho [S327(100)]	1	High	0.000113842	9.56086e-05	1	1	TGGT1_250850-t26_1-p1	TGGT1_250850-t26_1-p1 [315-330]	1	2539.28	0.832	-0.27	1	16.7	20.1	34.28	9.88	NA	NA	21.4	13	NA	NA	18.7	21.5		High	7.761e-05	6.314e-05	3.41
53055	TGGT1_226950	IgA-specific metalloendopeptidase	transcript=TGGT1_226950-t26_1 | gene=TGGT1_226950 | organism=Toxoplasma_gondii_GT1 | gene_product=IgA-specific metalloendopeptidase [Source:UniProtKB/TrEMBL;Acc:S7W5T7] | transcript_product=IgA-specific metalloendopeptidase | location=TGGT1_chrX:1106584-1115574(+) | protein_length=2042 | sequence_SO=chromosome | SO=protein_coding_gene | is_pseudo=false	[R].IACSQGPGGSVK.[D]	1xMethylthio [C3]; 1xTMTpro [K12]; 1xTMTpro [N-Term]; 1xPhospho [S10(100)]	TGGT1_226950-t26_1-p1 1xMethylthio [C1392]; 1xPhospho [S1399(100)]	1	High	7.30512e-05	9.56086e-05	1	1	TGGT1_226950-t26_1-p1	TGGT1_226950-t26_1-p1 [1390-1401]	0	1837.92	0.833	-0.26	1	66.9	80.4	17.89	10.6	NA	NA	76	59	NA	NA	74.6	86.6		High	7.761e-05	3.861e-05	4.12
92433	TGGT1_232080	hypothetical protein	transcript=TGGT1_232080-t26_1 | gene=TGGT1_232080 | organism=Toxoplasma_gondii_GT1 | gene_product=Chorein_N domain-containing protein [Source:UniProtKB/TrEMBL;Acc:S7WJ08] | transcript_product=hypothetical protein | location=TGGT1_chrVIII:1804634-1839298(-) | protein_length=10329 | sequence_SO=chromosome | SO=protein_coding_gene | is_pseudo=false	[R].SPSLHLNDEDDVR.[A]	1xTMTpro [N-Term]; 1xPhospho [S3(100)]	TGGT1_232080-t26_1-p1 1xPhospho [S7470(100)]	21	High	4.07434e-05	9.56086e-05	1	1	TGGT1_232080-t26_1-p1	TGGT1_232080-t26_1-p1 [7468-7480]	0	1880.87	1.162	0.22	1	44.5	38.3	57.56	54.72	29.8	16.5	66.7	67.7	25.9	21.7	56.7	71.2		High	7.761e-05	2.034e-05	4.7
53067	TGGT1_273560	putative kinesin heavy chain	transcript=TGGT1_273560-t26_1 | gene=TGGT1_273560 | organism=Toxoplasma_gondii_GT1 | gene_product=Kinesin motor domain-containing protein [Source:UniProtKB/TrEMBL;Acc:S7V3F2] | transcript_product=putative kinesin heavy chain | location=TGGT1_chrVIII:3381230-3400326(-) | protein_length=1641 | sequence_SO=chromosome | SO=protein_coding_gene | is_pseudo=false	[R].IADDVDEVEEASPLGSPSR.[V]	1xTMTpro [N-Term]; 1xPhospho [S12(100)]	TGGT1_273560-t26_1-p1 1xPhospho [S756(100)]	6	High	5.39043e-08	9.56086e-05	1	1	TGGT1_273560-t26_1-p1	TGGT1_273560-t26_1-p1 [745-763]	0	2370.1	1.136	0.18	1	41.8	36.8	52.75	44.12	16.8	29.6	61.2	58.9	31.8	17.5	42.5	56		High	7.761e-05	1.589e-08	6.2
28909	TGGT1_213370	formin FRM3	transcript=TGGT1_213370-t26_1 | gene=TGGT1_213370 | organism=Toxoplasma_gondii_GT1 | gene_product=FH2 domain-containing protein [Source:UniProtKB/TrEMBL;Acc:S7UPD2] | transcript_product=formin FRM3 | location=TGGT1_chrV:830746-839295(-) | protein_length=2849 | sequence_SO=chromosome | SO=protein_coding_gene | is_pseudo=false	[K].ESHPCPFSPQAGR.[S]	1xMethylthio [C5]; 1xTMTpro [N-Term]; 1xPhospho [S8(100)]	TGGT1_213370-t26_1-p1 1xMethylthio [C2727]; 1xPhospho [S2730(100)]	4	High	0.000102922	9.56086e-05	1	1	TGGT1_213370-t26_1-p1	TGGT1_213370-t26_1-p1 [2723-2735]	0	1842.8	1.039	0.05	1	31.5	30.3	19.34	5.74	NA	NA	36.1	27.4	NA	NA	31.5	29.1		High	7.761e-05	5.641e-05	3.27
92608	TGGT1_312560	hypothetical protein	transcript=TGGT1_312560-t26_1 | gene=TGGT1_312560 | organism=Toxoplasma_gondii_GT1 | gene_product=hypothetical protein | transcript_product=hypothetical protein | location=TGGT1_chrXI:2736062-2744870(+) | protein_length=2048 | sequence_SO=chromosome | SO=protein_coding_gene | is_pseudo=false	[R].SPSTPPRLEAESPEYGLPR.[S]	1xTMTpro [N-Term]; 1xPhospho [T4(99.3)]	TGGT1_312560-t26_1-p1 1xPhospho [T509(99.3)]	1	High	0.00013041	9.56086e-05	1	1	TGGT1_312560-t26_1-p1	TGGT1_312560-t26_1-p1 [506-524]	1	2467.22	1.012	0.02	1	141.6	139.9	16.11	3.63	158.8	126.3	NA	NA	143.5	136.4	NA	NA		High	0.0001044	7.754e-05	3.23
28906	TGGT1_223610	hypothetical protein	transcript=TGGT1_223610-t26_1 | gene=TGGT1_223610 | organism=Toxoplasma_gondii_GT1 | gene_product=hypothetical protein | transcript_product=hypothetical protein | location=TGGT1_chrX:3601437-3606218(-) | protein_length=1303 | sequence_SO=chromosome | SO=protein_coding_gene | is_pseudo=false	[K].ESHLEASEDEREK.[A]	1xTMTpro [K13]; 1xTMTpro [N-Term]; 1xPhospho [S7(100)]	TGGT1_223610-t26_1-p1 1xPhospho [S831(100)]	20	High	0.000136808	9.56086e-05	1	1	TGGT1_223610-t26_1-p1	TGGT1_223610-t26_1-p1 [825-837]	1	2247.08	0.944	-0.08	1	135.2	143.2	110.99	109.28	12.6	21.5	867.7	849.2	19.9	25.3	828	810.2		High	7.761e-05	7.769e-05	3.01
28905	TGGT1_223610	hypothetical protein	transcript=TGGT1_223610-t26_1 | gene=TGGT1_223610 | organism=Toxoplasma_gondii_GT1 | gene_product=hypothetical protein | transcript_product=hypothetical protein | location=TGGT1_chrX:3601437-3606218(-) | protein_length=1303 | sequence_SO=chromosome | SO=protein_coding_gene | is_pseudo=false	[K].ESHLEASEDER.[E]	1xTMTpro [N-Term]; 1xPhospho [S7(100)]	TGGT1_223610-t26_1-p1 1xPhospho [S831(100)]	23	High	8.81881e-05	9.56086e-05	1	1	TGGT1_223610-t26_1-p1	TGGT1_223610-t26_1-p1 [825-835]	0	1685.73	1.09	0.12	1	111.2	102	22.26	19.21	129.9	141	89.6	95.2	130.5	114.4	87.5	90.9		High	7.761e-05	4.75e-05	3.73
53075	TGGT1_230590	chitobiosyldiphosphodolichol beta-mannosyltransferase	transcript=TGGT1_230590-t26_1 | gene=TGGT1_230590 | organism=Toxoplasma_gondii_GT1 | gene_product=Chitobiosyldiphosphodolichol beta-mannosyltransferase [Source:UniProtKB/TrEMBL;Acc:S7V2A9] | transcript_product=chitobiosyldiphosphodolichol beta-mannosyltransferase | location=TGGT1_chrVIII:878034-882755(+) | protein_length=931 | sequence_SO=chromosome | SO=protein_coding_gene | is_pseudo=false	[R].LADHSEGDCETSEGLSSDPDSQR.[F]	1xMethylthio [C9]; 1xTMTpro [N-Term]; 1xPhospho [S5(100)]	TGGT1_230590-t26_1-p1 1xMethylthio [C475]; 1xPhospho [S471(100)]	16	High	2.85182e-09	9.56086e-05	1	1	TGGT1_230590-t26_1-p1	TGGT1_230590-t26_1-p1 [467-489]	0	2865.15	0.746	-0.42	1	30.5	40.8	21.23	1.48	NA	NA	35.4	26.2	NA	NA	40.4	41.2		High	7.761e-05	6.673e-10	6.99
53084	TGGT1_219630	flavodoxin domain-containing protein	transcript=TGGT1_219630-t26_1 | gene=TGGT1_219630 | organism=Toxoplasma_gondii_GT1 | gene_product=Flavodoxin-like domain-containing protein [Source:UniProtKB/TrEMBL;Acc:A0A125YRL5] | transcript_product=flavodoxin domain-containing protein | location=TGGT1_chrXII:741441-752773(+) | protein_length=949 | sequence_SO=chromosome | SO=protein_coding_gene | is_pseudo=false	[R].IADPTALQEEPMRTTPEVR.[G]	1xOxidation [M12]; 1xTMTpro [N-Term]; 1xPhospho [T]		2	High	0.000121175	9.56086e-05	1	1	TGGT1_219630-t26_1-p1	TGGT1_219630-t26_1-p1 [253-271]	1	2554.25	1.012	0.02	1	39.4	38.9	6.76	13.4	NA	NA	37.5	41.3	NA	NA	42.8	35.4		High	7.761e-05	6.779e-05	4
53085	TGGT1_319850	splicing factor U2AF family SnRNP auxilary factor large subunit, RRM domain-containing protein	transcript=TGGT1_319850-t26_1 | gene=TGGT1_319850 | organism=Toxoplasma_gondii_GT1 | gene_product=RRM domain-containing protein [Source:UniProtKB/TrEMBL;Acc:S7UK80] | transcript_product=splicing factor U2AF family SnRNP auxilary factor large subunit, RRM domain-containing protein | location=TGGT1_chrIV:689661-691811(+) | protein_length=495 | sequence_SO=chromosome | SO=protein_coding_gene | is_ps…	[K].LADSEGHEPIR.[L]	1xTMTpro [N-Term]; 1xPhospho [S4(100)]	TGGT1_319850-t26_1-p1 1xPhospho [S227(100)]	5	High	0.000131747	9.56086e-05	1	1	TGGT1_319850-t26_1-p1	TGGT1_319850-t26_1-p1 [224-234]	0	1607.77	0.939	-0.09	1	23.9	25.4	27.83	23.18	16.5	NA	23.9	29.3	15.9	25.6	25.3	28.6		High	7.761e-05	7.445e-05	3.35
78747	TGGT1_297720	trehalose-phosphatase	transcript=TGGT1_297720-t26_1 | gene=TGGT1_297720 | organism=Toxoplasma_gondii_GT1 | gene_product=CBM20 domain-containing protein [Source:UniProtKB/TrEMBL;Acc:S7VZF6] | transcript_product=trehalose-phosphatase | location=TGGT1_chrII:1916468-1928938(+) | protein_length=1222 | sequence_SO=chromosome | SO=protein_coding_gene | is_pseudo=false	[R].RNSVSSDENR.[A]	1xTMTpro [N-Term]; 1xPhospho [S3(100)]	TGGT1_297720-t26_1-p1 1xPhospho [S1030(100)]	14	High	2.84595e-05	9.56086e-05	1	1	TGGT1_297720-t26_1-p1	TGGT1_297720-t26_1-p1 [1028-1037]	1	1547.71	1.275	0.35	1	70.6	55.4	31.3	43.97	56	49.4	89	93.6	41.8	36.2	93.1	73.3		High	0.0001044	1.683e-05	3.21
53092	TGGT1_254570	hypothetical protein	transcript=TGGT1_254570-t26_1 | gene=TGGT1_254570 | organism=Toxoplasma_gondii_GT1 | gene_product=hypothetical protein | transcript_product=hypothetical protein | location=TGGT1_chrIII:1812321-1825184(-) | protein_length=1997 | sequence_SO=chromosome | SO=protein_coding_gene | is_pseudo=false	[K].LAEAAASPGTELPVPPR.[L]	1xTMTpro [N-Term]; 1xPhospho [S7(100)]	TGGT1_254570-t26_1-p1 1xPhospho [S384(100)]	2	High	2.39753e-05	9.56086e-05	1	1	TGGT1_254570-t26_1-p1	TGGT1_254570-t26_1-p1 [378-394]	0	2060.07	0.849	-0.24	1	19	22.4	45.75	7.89	NA	NA	13.6	26.6	NA	NA	23.7	21.2		High	7.761e-05	1.145e-05	4.23
92657	TGGT1_252340	hypothetical protein	transcript=TGGT1_252340-t26_1 | gene=TGGT1_252340 | organism=Toxoplasma_gondii_GT1 | gene_product=hypothetical protein | transcript_product=hypothetical protein | location=TGGT1_chrIII:479884-486400(+) | protein_length=1243 | sequence_SO=chromosome | SO=protein_coding_gene | is_pseudo=false	[R].SPTFAFTRPVGDAGR.[E]	1xTMTpro [N-Term]; 1xPhospho [T3(100)]	TGGT1_252340-t26_1-p1 1xPhospho [T705(100)]	2	High	0.000112994	9.56086e-05	1	1	TGGT1_252340-t26_1-p1	TGGT1_252340-t26_1-p1 [703-717]	0	1962.98	1.031	0.04	1	155.3	150.6	2.32	12.89	NA	NA	157.8	152.7	NA	NA	165	137.4		High	7.761e-05	6.26e-05	3.8
92595	TGGT1_209850	RNA recognition motif-containing protein	transcript=TGGT1_209850-t26_1 | gene=TGGT1_209850 | organism=Toxoplasma_gondii_GT1 | gene_product=RNA recognition motif-containing protein [Source:UniProtKB/TrEMBL;Acc:S7UJA3] | transcript_product=RNA recognition motif-containing protein | location=TGGT1_chrIb:1501964-1507671(-) | protein_length=1412 | sequence_SO=chromosome | SO=protein_coding_gene | is_pseudo=false	[R].SPSTDSHFGCER.[R]	1xMethylthio [C10]; 1xTMTpro [N-Term]; 3xPhospho [S1(100); S3(100); S6(100)]	TGGT1_209850-t26_1-p1 1xMethylthio [C1383]; 3xPhospho [S1374(100); S1376(100); S1379(100)]	2	High	9.69933e-05	9.56086e-05	1	1	TGGT1_209850-t26_1-p1	TGGT1_209850-t26_1-p1 [1374-1385]	0	1912.64	1.033	0.05	1	22.9	22.2	32.09	13.35	NA	NA	18.2	28.9	NA	NA	24.4	20.2		High	7.761e-05	5.284e-05	4.32
92161	TGGT1_269460	Ser/Thr phosphatase family protein	transcript=TGGT1_269460-t26_1 | gene=TGGT1_269460 | organism=Toxoplasma_gondii_GT1 | gene_product=Serine/threonine-protein phosphatase [Source:UniProtKB/TrEMBL;Acc:S7WL31] | transcript_product=Ser/Thr phosphatase family protein | location=TGGT1_chrVIII:5776112-5787896(+) | protein_length=2066 | sequence_SO=chromosome | SO=protein_coding_gene | is_pseudo=false	[R].SPPSLQELPPPSR.[E]	1xTMTpro [N-Term]; 1xPhospho [S4(100)]	TGGT1_269460-t26_1-p1 1xPhospho [S1868(100)]	1	High	0.000140199	9.56086e-05	1	1	TGGT1_269460-t26_1-p1	TGGT1_269460-t26_1-p1 [1865-1877]	0	1788.92	0.959	-0.06	1	27.2	28.3	6.21	3.54	NA	NA	26	28.4	NA	NA	29	27.6		High	7.761e-05	7.992e-05	3.79
92427	TGGT1_209450	TLD protein	transcript=TGGT1_209450-t26_1 | gene=TGGT1_209450 | organism=Toxoplasma_gondii_GT1 | gene_product=TLDc domain-containing protein [Source:UniProtKB/TrEMBL;Acc:S7UJE0] | transcript_product=TLD protein | location=TGGT1_chrIb:1247683-1255332(-) | protein_length=882 | sequence_SO=chromosome | SO=protein_coding_gene | is_pseudo=false	[R].SPSLDTLCQSTGGWR.[G]	1xMethylthio [C8]; 1xTMTpro [N-Term]; 1xPhospho [S3(99.7)]	TGGT1_209450-t26_1-p1 1xMethylthio [C570]; 1xPhospho [S565(99.7)]	2	High	0.000135431	9.56086e-05	1	1	TGGT1_209450-t26_1-p1	TGGT1_209450-t26_1-p1 [563-577]	0	2037.91	1.07	0.1	1	64.5	60.3	45.59	45.24	96.4	97.4	43.2	40.9	75.9	112.3	43.7	47.9		High	7.761e-05	7.675e-05	3.74
52975	TGGT1_315270	hypothetical protein	transcript=TGGT1_315270-t26_1 | gene=TGGT1_315270 | organism=Toxoplasma_gondii_GT1 | gene_product=hypothetical protein | transcript_product=hypothetical protein | location=TGGT1_chrXI:4558433-4565813(-) | protein_length=780 | sequence_SO=chromosome | SO=protein_coding_gene | is_pseudo=false	[R].LAAFLEPDSPRK.[E]	1xTMTpro [K12]; 1xTMTpro [N-Term]; 1xPhospho [S9(100)]	TGGT1_315270-t26_1-p1 1xPhospho [S323(100)]	8	High	1.13377e-05	9.56086e-05	1	1	TGGT1_315270-t26_1-p1	TGGT1_315270-t26_1-p1 [315-326]	1	2032.11	1.159	0.21	1	131	113	114.52	114.58	1865.3	1842.1	6.1	9.3	1787.3	1796.3	7.1	6.8		High	0.0001044	6.841e-06	5.32
92177	TGGT1_259860	hypothetical protein	transcript=TGGT1_259860-t26_1 | gene=TGGT1_259860 | organism=Toxoplasma_gondii_GT1 | gene_product=SANT domain-containing protein [Source:UniProtKB/TrEMBL;Acc:S7WEG8] | transcript_product=hypothetical protein | location=TGGT1_chrVIIb:2626172-2635179(-) | protein_length=2125 | sequence_SO=chromosome | SO=protein_coding_gene | is_pseudo=false	[R].SPPTEVHAAAGTEETGEQSEDAPACSVER.[A]	1xMethylthio [C25]; 1xTMTpro [N-Term]; 1xPhospho [S1(99.6)]	TGGT1_259860-t26_1-p1 1xMethylthio [C578]; 1xPhospho [S554(99.6)]	2	High	8.27479e-06	9.56086e-05	1	1	TGGT1_259860-t26_1-p1	TGGT1_259860-t26_1-p1 [554-582]	0	3385.45	1.103	0.14	1	8.6	7.8	8.37	37.72	NA	NA	9.1	8.1	NA	NA	5.9	10.2		High	7.761e-05	3.621e-06	3.97
52890	TGGT1_205500	hypothetical protein	transcript=TGGT1_205500-t26_1 | gene=TGGT1_205500 | organism=Toxoplasma_gondii_GT1 | gene_product=hypothetical protein | transcript_product=hypothetical protein | location=TGGT1_chrVIIa:1278562-1285671(+) | protein_length=1009 | sequence_SO=chromosome | SO=protein_coding_gene | is_pseudo=false	[R].KVSTAGTQVEETAQQLQK.[L]	2xTMTpro [K1; K18]; 1xTMTpro [N-Term]; 1xPhospho [S3(99.7)]	TGGT1_205500-t26_1-p1 1xPhospho [S795(99.7)]	1	High	1.97628e-05	9.56086e-05	1	1	TGGT1_205500-t26_1-p1	TGGT1_205500-t26_1-p1 [793-810]	1	2938.61	2.203	1.14	0.00276898	130.4	59.2	3.37	9.16	NA	NA	127.4	133.6	NA	NA	63.2	55.5		High	7.761e-05	9.272e-06	5.3
92188	TGGT1_247040	hypothetical protein	transcript=TGGT1_247040-t26_1 | gene=TGGT1_247040 | organism=Toxoplasma_gondii_GT1 | gene_product=hypothetical protein | transcript_product=hypothetical protein | location=TGGT1_chrXII:3051933-3058222(-) | protein_length=1140 | sequence_SO=chromosome | SO=protein_coding_gene | is_pseudo=false	[K].SPQAAAEQTTPR.[R]	1xTMTpro [N-Term]; 1xPhospho [T10(99.7)]	TGGT1_247040-t26_1-p1 1xPhospho [T978(99.7)]	5	High	2.91164e-05	9.56086e-05	1	1	TGGT1_247040-t26_1-p1	TGGT1_247040-t26_1-p1 [969-980]	0	1640.8	1.161	0.22	1	7.6	6.6	7.51	7.09	NA	NA	7.2	8.1	NA	NA	6.3	6.9		High	7.761e-05	1.413e-05	3.85
52891	TGGT1_318620	RNA-directed RNA polymerase	transcript=TGGT1_318620-t26_1 | gene=TGGT1_318620 | organism=Toxoplasma_gondii_GT1 | gene_product=RNA-directed RNA polymerase [Source:UniProtKB/TrEMBL;Acc:S7VT39] | transcript_product=RNA-directed RNA polymerase | location=TGGT1_chrIV:1122040-1131604(+) | protein_length=1252 | sequence_SO=chromosome | SO=protein_coding_gene | is_pseudo=false	[R].KVSTEDVAIVSPGK.[E]	2xTMTpro [K1; K14]; 1xTMTpro [N-Term]; 1xPhospho [S/T]		1	High	2.50982e-05	9.56086e-05	1	1	TGGT1_318620-t26_1-p1	TGGT1_318620-t26_1-p1 [1238-1251]	1	2422.38	0.84	-0.25	1	26.8	31.9	12.95	3.57	NA	NA	24.5	29.4	NA	NA	31.1	32.7		High	7.761e-05	1.201e-05	3.84
92215	TGGT1_211730	histone lysine methyltransferase SET8	transcript=TGGT1_211730-t26_1 | gene=TGGT1_211730 | organism=Toxoplasma_gondii_GT1 | gene_product=SET domain-containing protein [Source:UniProtKB/TrEMBL;Acc:S7UKM8] | transcript_product=histone lysine methyltransferase SET8 | location=TGGT1_chrIV:1486407-1496127(+) | protein_length=1906 | sequence_SO=chromosome | SO=protein_coding_gene | is_pseudo=false	[K].SPQLADAASASVGDSSDAPGNSPSASR.[S]	1xTMTpro [N-Term]; 1xPhospho [S22(99.5)]	TGGT1_211730-t26_1-p1 1xPhospho [S667(99.5)]	5	High	4.25915e-07	9.56086e-05	1	1	TGGT1_211730-t26_1-p1	TGGT1_211730-t26_1-p1 [646-672]	0	2886.31	1.34	0.42	1	47.1	35.2	0.13	5.44	NA	NA	47.2	47.1	NA	NA	36.6	33.8		High	7.761e-05	1.474e-07	5.58
29316	TGGT1_306020	hypothetical protein	transcript=TGGT1_306020-t26_1 | gene=TGGT1_306020 | organism=Toxoplasma_gondii_GT1 | gene_product=hypothetical protein | transcript_product=hypothetical protein | location=TGGT1_chrIX:5506123-5536326(+) | protein_length=8858 | sequence_SO=chromosome | SO=protein_coding_gene | is_pseudo=false	[R].ESSFAGSGPEGLDQDR.[D]	1xTMTpro [N-Term]; 1xPhospho [S7(100)]	TGGT1_306020-t26_1-p1 1xPhospho [S6964(100)]	7	High	3.09248e-05	9.56086e-05	1	1	TGGT1_306020-t26_1-p1	TGGT1_306020-t26_1-p1 [6958-6973]	0	2035.89	0.673	-0.57	1	14.2	21.1	29.49	20.92	17.5	11.5	NA	NA	18.2	24.5	NA	NA		High	0.0001044	1.823e-05	3.46
92275	TGGT1_226050	hypothetical protein	transcript=TGGT1_226050-t26_1 | gene=TGGT1_226050 | organism=Toxoplasma_gondii_GT1 | gene_product=RBR-type E3 ubiquitin transferase [Source:UniProtKB/TrEMBL;Acc:S7UWI8] | transcript_product=hypothetical protein | location=TGGT1_chrX:1753736-1757511(-) | protein_length=774 | sequence_SO=chromosome | SO=protein_coding_gene | is_pseudo=false	[R].SPRPFDVPAAEAASPASK.[R]	1xTMTpro [K18]; 1xTMTpro [N-Term]; 1xPhospho [S14(100)]	TGGT1_226050-t26_1-p1 1xPhospho [S651(100)]	2	High	1.36634e-07	9.56086e-05	1	1	TGGT1_226050-t26_1-p1	TGGT1_226050-t26_1-p1 [638-655]	0	2486.29	1.051	0.07	1	97.9	93.2	7.49	7.97	NA	NA	92.8	103.2	NA	NA	88.1	98.6		High	7.761e-05	4.326e-08	6.02
78825	TGGT1_295850	cyclic nucleotide-binding domain-containing protein	transcript=TGGT1_295850-t26_1 | gene=TGGT1_295850 | organism=Toxoplasma_gondii_GT1 | gene_product=Cyclic nucleotide-binding domain-containing protein [Source:UniProtKB/TrEMBL;Acc:S7VRS7] | transcript_product=cyclic nucleotide-binding domain-containing protein | location=TGGT1_chrIa:1477996-1491633(-) | protein_length=3062 | sequence_SO=chromosome | SO=protein_coding_gene | is_pseudo=false	[R].RPASPEEDVAR.[K]	1xTMTpro [N-Term]; 1xPhospho [S4(100)]	TGGT1_295850-t26_1-p1 1xPhospho [S392(100)]	10	High	9.08075e-05	9.56086e-05	1	1	TGGT1_295850-t26_1-p1	TGGT1_295850-t26_1-p1 [389-399]	0	1610.79	0.974	-0.04	1	78.9	81	28.69	24.69	64.5	53.5	97.4	96.5	61.1	68	96.5	101.6		High	7.761e-05	4.908e-05	3.86
78819	TGGT1_239410	hypothetical protein	transcript=TGGT1_239410-t26_1 | gene=TGGT1_239410 | organism=Toxoplasma_gondii_GT1 | gene_product=hypothetical protein | transcript_product=hypothetical protein | location=TGGT1_chrVI:620562-631430(-) | protein_length=2505 | sequence_SO=chromosome | SO=protein_coding_gene | is_pseudo=false	[R].RPASGGGSYPSSLGAGK.[R]	1xTMTpro [K17]; 1xTMTpro [N-Term]; 1xPhospho [S4(100)]	TGGT1_239410-t26_1-p1 1xPhospho [S2296(100)]	4	High	6.51666e-07	9.56086e-05	1	1	TGGT1_239410-t26_1-p1	TGGT1_239410-t26_1-p1 [2293-2309]	0	2237.16	0.548	-0.87	1	47.1	86	46.41	45	31.2	32.7	79.3	67.9	58.7	55	125.8	132.5		High	7.761e-05	2.334e-07	5.55
52935	TGGT1_243250	myosin H	transcript=TGGT1_243250-t26_1 | gene=TGGT1_243250 | organism=Toxoplasma_gondii_GT1 | gene_product=Myosin motor domain-containing protein [Source:UniProtKB/TrEMBL;Acc:A0A125YQD3] | transcript_product=myosin H | location=TGGT1_chrVI:2380998-2399536(-) | protein_length=1513 | sequence_SO=chromosome | SO=protein_coding_gene | is_pseudo=false	[R].KYSAVELGDYLVGSPVFIR.[E]	1xTMTpro [K1]; 1xTMTpro [N-Term]; 1xPhospho [S3(100)]	TGGT1_243250-t26_1-p1 1xPhospho [S20(100)]	3	High	4.92959e-08	9.56086e-05	1	1	TGGT1_243250-t26_1-p1	TGGT1_243250-t26_1-p1 [18-36]	1	2801.51	1.17	0.23	1	154.7	132.3	15.49	8.02	187	165.9	144.3	131.7	130.9	153.7	133.6	130.9		High	7.761e-05	1.443e-08	6.79
78810	TGGT1_294930	leucine rich repeat-containing protein	transcript=TGGT1_294930-t26_1 | gene=TGGT1_294930 | organism=Toxoplasma_gondii_GT1 | gene_product=Leucine rich repeat-containing protein [Source:UniProtKB/TrEMBL;Acc:S7UJ16] | transcript_product=leucine rich repeat-containing protein | location=TGGT1_chrIa:1265687-1267819(+) | protein_length=291 | sequence_SO=chromosome | SO=protein_coding_gene | is_pseudo=false	[K].RPAPSVESVSPK.[K]	1xTMTpro [K12]; 1xTMTpro [N-Term]; 1xPhospho [S10(100)]	TGGT1_294930-t26_1-p1 1xPhospho [S285(100)]	9	High	3.19477e-05	9.56086e-05	1	1	TGGT1_294930-t26_1-p1	TGGT1_294930-t26_1-p1 [276-287]	0	1942.07	0.894	-0.16	1	149	166.7	39.96	17.39	108.7	106.3	204.3	232.8	146.8	142.4	200.6	189.4		High	7.761e-05	1.563e-05	4.03
29284	TGGT1_222900	phosphoserine phosphatase	transcript=TGGT1_222900-t26_1 | gene=TGGT1_222900 | organism=Toxoplasma_gondii_GT1 | gene_product=Phosphoserine phosphatase [Source:UniProtKB/TrEMBL;Acc:S7UL15] | transcript_product=phosphoserine phosphatase | location=TGGT1_chrII:1266680-1283473(-) | protein_length=1766 | sequence_SO=chromosome | SO=protein_coding_gene | is_pseudo=false	[R].ESSCENGENLSENRESLTEK.[R]	1xMethylthio [C4]; 1xTMTpro [K20]; 1xTMTpro [N-Term]; 1xPhospho [S/T]	TGGT1_222900-t26_1-p1 1xMethylthio [C1554]	4	High	9.41098e-06	9.56086e-05	1	1	TGGT1_222900-t26_1-p1	TGGT1_222900-t26_1-p1 [1551-1570]	1	2989.34	1.252	0.32	1	55.2	44.1	39.56	28.03	27.3	47.6	76.6	64.1	37.8	27.4	51.5	52		High	7.761e-05	4.16e-06	4.8
52949	TGGT1_306600	RNA recognition motif-containing protein	transcript=TGGT1_306600-t26_1 | gene=TGGT1_306600 | organism=Toxoplasma_gondii_GT1 | gene_product=RRM domain-containing protein [Source:UniProtKB/TrEMBL;Acc:A0A125YLJ1] | transcript_product=RNA recognition motif-containing protein | location=TGGT1_chrIX:5986467-5988759(-) | protein_length=189 | sequence_SO=chromosome | SO=protein_coding_gene | is_pseudo=false	[R].LAAAAGPAASSGAR.[H]	1xTMTpro [N-Term]; 1xPhospho [S10(99.7)]	TGGT1_306600-t26_1-p1 1xPhospho [S106(99.7)]	3	High	6.31874e-05	9.56086e-05	1	1	TGGT1_306600-t26_1-p1	TGGT1_306600-t26_1-p1 [97-110]	0	1554.8	1.262	0.34	1	46.1	36.5	27.54	47.15	27.9	42.9	56.3	49.5	24.2	23.4	55.2	57.7		High	7.761e-05	3.287e-05	3.53
92313	TGGT1_261520	putative nucleolar GTP-binding protein 1	transcript=TGGT1_261520-t26_1 | gene=TGGT1_261520 | organism=Toxoplasma_gondii_GT1 | gene_product=OBG-type G domain-containing protein [Source:UniProtKB/TrEMBL;Acc:S7UYA0] | transcript_product=putative nucleolar GTP-binding protein 1 | location=TGGT1_chrVIIb:1646922-1654757(-) | protein_length=719 | sequence_SO=chromosome | SO=protein_coding_gene | is_pseudo=false	[R].SPSAGSADGDEADGHSR.[L]	1xTMTpro [N-Term]; 1xPhospho [S1(100)]	TGGT1_261520-t26_1-p1 1xPhospho [S599(100)]	15	High	1.33947e-07	9.56086e-05	1	1	TGGT1_261520-t26_1-p1	TGGT1_261520-t26_1-p1 [599-615]	0	1999.83	0.983	-0.02	1	11.6	11.8	5.59	6.45	NA	NA	12.1	11.2	NA	NA	11.3	12.4		High	7.761e-05	4.239e-08	5.66
78809	TGGT1_247040	hypothetical protein	transcript=TGGT1_247040-t26_1 | gene=TGGT1_247040 | organism=Toxoplasma_gondii_GT1 | gene_product=hypothetical protein | transcript_product=hypothetical protein | location=TGGT1_chrXII:3051933-3058222(-) | protein_length=1140 | sequence_SO=chromosome | SO=protein_coding_gene | is_pseudo=false	[R].RPAPGEEESAPLSPLK.[R]	1xTMTpro [K16]; 1xTMTpro [N-Term]; 1xPhospho [S13(100)]	TGGT1_247040-t26_1-p1 1xPhospho [S676(100)]	6	High	2.27153e-05	9.56086e-05	1	1	TGGT1_247040-t26_1-p1	TGGT1_247040-t26_1-p1 [664-679]	0	2366.26	1.102	0.14	1	73.9	67	19.36	20.53	63.6	60.4	85.9	87.8	53.6	58.2	77.1	82		High	7.761e-05	1.079e-05	3.7
78807	TGGT1_209108	hypothetical protein	transcript=TGGT1_209108-t26_1 | gene=TGGT1_209108 | organism=Toxoplasma_gondii_GT1 | gene_product=hypothetical protein | transcript_product=hypothetical protein | location=TGGT1_chrIb:1065815-1068510(-) | protein_length=400 | sequence_SO=chromosome | SO=protein_coding_gene | is_pseudo=false	[K].RPAPAEAGSETGVSFPGGGDAERPPSR.[G]	1xTMTpro [N-Term]; 1xPhospho [S26(100)]	TGGT1_209108-t26_1-p1 1xPhospho [S211(100)]	9	High	2.62432e-06	9.56086e-05	1	1	TGGT1_209108-t26_1-p1	TGGT1_209108-t26_1-p1 [186-212]	0	3036.45	1.292	0.37	1	124.3	96.2	2.98	16.56	NA	NA	127	121.7	NA	NA	108.3	85.6		High	7.761e-05	1.047e-06	4.2
92351	TGGT1_236970	SWI2/SNF2-containing PHD finger protein	transcript=TGGT1_236970-t26_1 | gene=TGGT1_236970 | organism=Toxoplasma_gondii_GT1 | gene_product=SWI2/SNF2-containing PHD finger protein [Source:UniProtKB/TrEMBL;Acc:S7VZH4] | transcript_product=SWI2/SNF2-containing PHD finger protein | location=TGGT1_chrX:5508193-5518721(+) | protein_length=2556 | sequence_SO=chromosome | SO=protein_coding_gene | is_pseudo=false	[R].SPSDRESGPGTASPGAALLPAGR.[G]	1xTMTpro [N-Term]; 1xPhospho [S3(99.5)]	TGGT1_236970-t26_1-p1 1xPhospho [S2041(99.5)]	3	High	4.01551e-05	9.56086e-05	1	1	TGGT1_236970-t26_1-p1	TGGT1_236970-t26_1-p1 [2039-2061]	1	2535.25	0.855	-0.23	1	71.9	84.1	4.27	1.75	NA	NA	69.8	74.1	NA	NA	83.1	85.1		High	7.761e-05	2.002e-05	3.78
92363	TGGT1_280660	HECT-domain (ubiquitin-transferase) domain-containing protein	transcript=TGGT1_280660-t26_1 | gene=TGGT1_280660 | organism=Toxoplasma_gondii_GT1 | gene_product=HECT domain-containing protein [Source:UniProtKB/TrEMBL;Acc:S7UUN0] | transcript_product=HECT-domain (ubiquitin-transferase) domain-containing protein | location=TGGT1_chrVIIa:173679-235804(-) | protein_length=17226 | sequence_SO=chromosome | SO=protein_coding_gene | is_pseudo=false	[R].SPSEGHQETGPVGQGDTAQGGDR.[A]	1xTMTpro [N-Term]; 1xPhospho [S3(99.6)]	TGGT1_280660-t26_1-p1 1xPhospho [S14149(99.6)]	3	High	6.2216e-07	9.56086e-05	1	1	TGGT1_280660-t26_1-p1	TGGT1_280660-t26_1-p1 [14147-14169]	0	2651.17	0.813	-0.3	1	6.6	8.1	12.31	12.59	NA	NA	6	7.2	NA	NA	7.4	8.8		High	7.761e-05	2.219e-07	5.52
52970	TGGT1_257560	WD domain, G-beta repeat-containing protein	transcript=TGGT1_257560-t26_1 | gene=TGGT1_257560 | organism=Toxoplasma_gondii_GT1 | gene_product=WD_REPEATS_REGION domain-containing protein [Source:UniProtKB/TrEMBL;Acc:S7UZF8] | transcript_product=WD domain, G-beta repeat-containing protein | location=TGGT1_chrVIIb:3904702-3908262(+) | protein_length=1017 | sequence_SO=chromosome | SO=protein_coding_gene | is_pseudo=false	[R].IAAETPSDEDSDEDFGPQPLASAATSSPVR.[A]	1xTMTpro [N-Term]; 2xPhospho [S7(99.4); S11(100)]	TGGT1_257560-t26_1-p1 2xPhospho [S93(99.4); S97(100)]	1	High	2.43443e-07	9.56086e-05	1	1	TGGT1_257560-t26_1-p1	TGGT1_257560-t26_1-p1 [87-116]	0	3524.53	1.196	0.26	1	16.9	14.1	20.47	20.62	NA	NA	19.6	14.6	NA	NA	12.2	16.4		High	7.761e-05	8.072e-08	5.86
92377	TGGT1_246080	NAD dependent epimerase/dehydratase family protein	transcript=TGGT1_246080-t26_1 | gene=TGGT1_246080 | organism=Toxoplasma_gondii_GT1 | gene_product=DUF1731 domain-containing protein [Source:UniProtKB/TrEMBL;Acc:S7V147] | transcript_product=NAD dependent epimerase/dehydratase family protein | location=TGGT1_chrXII:2579599-2585029(-) | protein_length=636 | sequence_SO=chromosome | SO=protein_coding_gene | is_pseudo=false	[K].SPSEVQDAQVPADPSAEETR.[G]	1xTMTpro [N-Term]; 1xPhospho [S3(99.7)]	TGGT1_246080-t26_1-p1 1xPhospho [S137(99.7)]	12	High	1.13628e-06	9.56086e-05	1	1	TGGT1_246080-t26_1-p1	TGGT1_246080-t26_1-p1 [135-154]	0	2497.14	0.807	-0.31	1	29.8	36.9	15.38	3.25	NA	NA	26.7	33.2	NA	NA	37.8	36.1		High	7.761e-05	4.251e-07	4.39
92398	TGGT1_316650	hypothetical protein	transcript=TGGT1_316650-t26_1 | gene=TGGT1_316650 | organism=Toxoplasma_gondii_GT1 | gene_product=hypothetical protein | transcript_product=hypothetical protein | location=TGGT1_chrXI:5404029-5408889(-) | protein_length=1278 | sequence_SO=chromosome | SO=protein_coding_gene | is_pseudo=false	[K].SPSGISSSPSQGENVER.[S]	1xTMTpro [N-Term]; 1xPhospho [S3(99.7)]	TGGT1_316650-t26_1-p1 1xPhospho [S292(99.7)]	9	High	4.98416e-06	9.56086e-05	1	1	TGGT1_316650-t26_1-p1	TGGT1_316650-t26_1-p1 [290-306]	0	2101.97	0.824	-0.28	1	37.8	45.9	69.74	68.34	19.8	17.5	72.4	77.8	27.5	13.7	80.2	76.5		High	7.761e-05	2.094e-06	4.32
29134	TGGT1_247730	AP2 domain transcription factor AP2XII-5	transcript=TGGT1_247730-t26_1 | gene=TGGT1_247730 | organism=Toxoplasma_gondii_GT1 | gene_product=AP2 domain transcription factor AP2XII-5 [Source:UniProtKB/TrEMBL;Acc:S7V143] | transcript_product=AP2 domain transcription factor AP2XII-5 | location=TGGT1_chrXII:3468697-3473688(-) | protein_length=1502 | sequence_SO=chromosome | SO=protein_coding_gene | is_pseudo=false	[K].ESPSPEPAPPTSGDAR.[V]	1xTMTpro [N-Term]; 1xPhospho [S4(100)]	TGGT1_247730-t26_1-p1 1xPhospho [S220(100)]	2	High	3.50473e-05	9.56086e-05	1	1	TGGT1_247730-t26_1-p1	TGGT1_247730-t26_1-p1 [217-232]	0	1978.91	1.144	0.19	1	27.5	24.1	2.37	18.58	NA	NA	27.1	28	NA	NA	27.5	21.1		High	7.761e-05	1.728e-05	3.54
92408	TGGT1_304490	hypothetical protein	transcript=TGGT1_304490-t26_1 | gene=TGGT1_304490 | organism=Toxoplasma_gondii_GT1 | gene_product=hypothetical protein | transcript_product=hypothetical protein | location=TGGT1_chrVIIa:497429-500326(-) | protein_length=294 | sequence_SO=chromosome | SO=protein_coding_gene | is_pseudo=false	[R].SPSGTNTTSAGSLQTDHLTDK.[K]	1xTMTpro [K21]; 1xTMTpro [N-Term]; 1xPhospho [S3(99.6)]	TGGT1_304490-t26_1-p1 1xPhospho [S10(99.6)]	3	High	2.42404e-06	9.56086e-05	1	1	TGGT1_304490-t26_1-p1	TGGT1_304490-t26_1-p1 [8-28]	0	2806.38	0.636	-0.65	0.430197	32.7	51.5	11.09	10.12	32.5	33	39.4	30.8	42.2	52.1	50.9	53.1		High	7.761e-05	9.62e-07	3.85
92423	TGGT1_246982	hypothetical protein	transcript=TGGT1_246982-t26_1 | gene=TGGT1_246982 | organism=Toxoplasma_gondii_GT1 | gene_product=hypothetical protein | transcript_product=hypothetical protein | location=TGGT1_chrXII:3000244-3004134(-) | protein_length=1042 | sequence_SO=chromosome | SO=protein_coding_gene | is_pseudo=false	[K].SPSLACHTETR.[G]	1xMethylthio [C6]; 1xTMTpro [N-Term]; 1xPhospho [S1(100)]	TGGT1_246982-t26_1-p1 1xMethylthio [C275]; 1xPhospho [S270(100)]	5	High	2.84114e-06	9.56086e-05	1	1	TGGT1_246982-t26_1-p1	TGGT1_246982-t26_1-p1 [270-280]	0	1631.72	1.153	0.21	1	45.5	39.5	24.94	18.68	42.1	30.6	56.9	49.2	33.3	35.5	49.7	43.9		High	7.761e-05	1.141e-06	4.46
92307	TGGT1_272000	hypothetical protein	transcript=TGGT1_272000-t26_1 | gene=TGGT1_272000 | organism=Toxoplasma_gondii_GT1 | gene_product=hypothetical protein | transcript_product=hypothetical protein | location=TGGT1_chrVIII:4223510-4232692(+) | protein_length=1541 | sequence_SO=chromosome | SO=protein_coding_gene | is_pseudo=false	[R].SPSAEATSESAGETR.[G]	1xTMTpro [N-Term]; 1xPhospho [S10(100)]	TGGT1_272000-t26_1-p1 1xPhospho [S967(100)]	1	High	1.71899e-05	9.56086e-05	1	1	TGGT1_272000-t26_1-p1	TGGT1_272000-t26_1-p1 [958-972]	0	1863.83	1.312	0.39	1	17.3	13.2	6.49	14.89	NA	NA	18.1	16.6	NA	NA	14.7	11.9		High	7.761e-05	7.97e-06	3.6
28877	TGGT1_273540	putative phosphatidylserine synthase	transcript=TGGT1_273540-t26_1 | gene=TGGT1_273540 | organism=Toxoplasma_gondii_GT1 | gene_product=Putative phosphatidylserine synthase [Source:UniProtKB/TrEMBL;Acc:S7WJT7] | transcript_product=putative phosphatidylserine synthase | location=TGGT1_chrVIII:3409334-3411178(+) | protein_length=614 | sequence_SO=chromosome | SO=protein_coding_gene | is_pseudo=false	[K].ESGTPNNAASPGSLK.[S]	1xTMTpro [K15]; 1xTMTpro [N-Term]; 1xPhospho [S13(100)]	TGGT1_273540-t26_1-p1 1xPhospho [S20(100)]	4	High	8.35712e-06	9.56086e-05	1	1	TGGT1_273540-t26_1-p1	TGGT1_273540-t26_1-p1 [8-22]	0	2118.07	0.581	-0.78	1	16.6	28.6	38.53	22.64	11	12.2	23.7	22.6	25.3	32.3	21.2	35.3		High	7.761e-05	3.658e-06	4.41
78904	TGGT1_263820	DEAD/DEAH box helicase domain-containing protein	transcript=TGGT1_263820-t26_1 | gene=TGGT1_263820 | organism=Toxoplasma_gondii_GT1 | gene_product=DEAD/DEAH box helicase domain-containing protein [Source:UniProtKB/TrEMBL;Acc:S7W6E5] | transcript_product=DEAD/DEAH box helicase domain-containing protein | location=TGGT1_chrVIIb:278943-285443(+) | protein_length=1053 | sequence_SO=chromosome | SO=protein_coding_gene | is_pseudo=false	[K].RPETPLAVEVSK.[E]	1xTMTpro [K12]; 1xTMTpro [N-Term]; 1xPhospho [T4(100)]	TGGT1_263820-t26_1-p1 1xPhospho [T573(100)]	3	High	9.00111e-06	9.56086e-05	1	1	TGGT1_263820-t26_1-p1	TGGT1_263820-t26_1-p1 [570-581]	0	2014.12	0.845	-0.24	1	46	54.5	83.65	79.98	21.1	15.6	120.5	100.4	15.4	27	109.8	119.6		High	7.761e-05	3.966e-06	4.54
52749	TGGT1_305920	endonuclease III family 1 protein	transcript=TGGT1_305920-t26_1 | gene=TGGT1_305920 | organism=Toxoplasma_gondii_GT1 | gene_product=Endonuclease III homolog [Source:UniProtKB/TrEMBL;Acc:S7VQV5] | transcript_product=endonuclease III family 1 protein | location=TGGT1_chrIX:5449193-5455691(+) | protein_length=693 | sequence_SO=chromosome | SO=protein_coding_gene | is_pseudo=false	[K].KTPEIEVEVSPQKD.[-]	2xTMTpro [K1; K13]; 1xTMTpro [N-Term]; 1xPhospho [S10(100)]	TGGT1_305920-t26_1-p1 1xPhospho [S689(100)]	2	High	4.67308e-06	9.56086e-05	1	1	TGGT1_305920-t26_1-p1	TGGT1_305920-t26_1-p1 [680-693]	2	2591.41	0.911	-0.13	1	147.4	161.7	4.53	5.5	NA	NA	152.2	142.7	NA	NA	155.5	168.1		High	7.761e-05	1.952e-06	4.61
79073	TGGT1_297170	putative 50S ribosomal protein L17	transcript=TGGT1_297170-t26_1 | gene=TGGT1_297170 | organism=Toxoplasma_gondii_GT1 | gene_product=Putative 50S ribosomal protein L17 [Source:UniProtKB/TrEMBL;Acc:A0A125YFX9] | transcript_product=putative 50S ribosomal protein L17 | location=TGGT1_chrII:1562808-1565863(+) | protein_length=247 | sequence_SO=chromosome | SO=protein_coding_gene | is_pseudo=false	[R].RPSAAEWEESDSEEEK.[A]	1xTMTpro [K16]; 1xTMTpro [N-Term]; 2xPhospho [S10(100); S12(100)]	TGGT1_297170-t26_1-p1 2xPhospho [S198(100); S200(100)]	10	High	0.000121894	9.56086e-05	1	1	TGGT1_297170-t26_1-p1	TGGT1_297170-t26_1-p1 [189-204]	0	2647.15	1.194	0.26	1	71.9	60.2	42.64	51.23	100.2	114	48.4	51.5	83	110.7	43.6	35.9		High	0.0001044	7.22e-05	2.04
52478	TGGT1_220900	hypothetical protein	transcript=TGGT1_220900-t26_1 | gene=TGGT1_220900 | organism=Toxoplasma_gondii_GT1 | gene_product=hypothetical protein | transcript_product=hypothetical protein | location=TGGT1_chrII:27409-29529(+) | protein_length=706 | sequence_SO=chromosome | SO=protein_coding_gene | is_pseudo=false	[R].KSANEEDGEGAQESTAAK.[L]	2xTMTpro [K1; K18]; 1xTMTpro [N-Term]; 1xPhospho [S2(100)]	TGGT1_220900-t26_1-p1 1xPhospho [S403(100)]	5	High	9.58324e-06	9.56086e-05	1	1	TGGT1_220900-t26_1-p1	TGGT1_220900-t26_1-p1 [402-419]	1	2814.4	1.03	0.04	1	63.5	61.6	22.58	24.43	50.7	53.8	74.9	79.6	52.6	44.3	72.2	74.8		High	7.761e-05	4.24e-06	4.1
91472	TGGT1_231220	hypothetical protein	transcript=TGGT1_231220-t26_1 | gene=TGGT1_231220 | organism=Toxoplasma_gondii_GT1 | gene_product=hypothetical protein | transcript_product=hypothetical protein | location=TGGT1_chrVIII:1333647-1336375(+) | protein_length=451 | sequence_SO=chromosome | SO=protein_coding_gene | is_pseudo=false	[R].SNSVLMETDYREDGTGSPSPR.[D]	1xTMTpro [N-Term]; 1xPhospho [S3(100)]	TGGT1_231220-t26_1-p1 1xPhospho [S312(100)]	4	High	4.6203e-05	9.56086e-05	1	1	TGGT1_231220-t26_1-p1	TGGT1_231220-t26_1-p1 [310-330]	1	2682.2	1.308	0.39	1	60.1	46	10.38	0.87	NA	NA	64.7	55.9	NA	NA	46.3	45.7		High	7.761e-05	2.335e-05	3.11
91474	TGGT1_231220	hypothetical protein	transcript=TGGT1_231220-t26_1 | gene=TGGT1_231220 | organism=Toxoplasma_gondii_GT1 | gene_product=hypothetical protein | transcript_product=hypothetical protein | location=TGGT1_chrVIII:1333647-1336375(+) | protein_length=451 | sequence_SO=chromosome | SO=protein_coding_gene | is_pseudo=false	[R].SNSVLMETDYREDGTGSPSPR.[D]	1xTMTpro [N-Term]; 2xPhospho [S3(100); S19(100)]	TGGT1_231220-t26_1-p1 2xPhospho [S312(100); S328(100)]	7	High	5.16963e-05	9.56086e-05	1	1	TGGT1_231220-t26_1-p1	TGGT1_231220-t26_1-p1 [310-330]	1	2762.17	1.142	0.19	1	111.7	97.8	62.07	52.76	63.9	57.3	195.4	206.1	64.7	47.2	147.9	149.2		High	7.761e-05	2.64e-05	4.07
79057	TGGT1_239800	hypothetical protein	transcript=TGGT1_239800-t26_1 | gene=TGGT1_239800 | organism=Toxoplasma_gondii_GT1 | gene_product=Chorein_N domain-containing protein [Source:UniProtKB/TrEMBL;Acc:S7W6E8] | transcript_product=hypothetical protein | location=TGGT1_chrVI:916718-920124(-) | protein_length=309 | sequence_SO=chromosome | SO=protein_coding_gene | is_pseudo=false	[R].RPQVITAPSPSSTK.[T]	1xTMTpro [K14]; 1xTMTpro [N-Term]; 1xPhospho [S9(100)]	TGGT1_239800-t26_1-p1 1xPhospho [S292(100)]	2	High	4.10787e-06	9.56086e-05	1	1	TGGT1_239800-t26_1-p1	TGGT1_239800-t26_1-p1 [284-297]	0	2157.19	0.878	-0.19	1	32.1	36.6	17.42	0.35	NA	NA	28.4	36.3	NA	NA	36.7	36.5		High	7.761e-05	1.7e-06	4.2
30302	TGGT1_247000	tetratricopeptide repeat-containing protein	transcript=TGGT1_247000-t26_1 | gene=TGGT1_247000 | organism=Toxoplasma_gondii_GT1 | gene_product=Tetratricopeptide repeat-containing protein [Source:UniProtKB/TrEMBL;Acc:S7WH26] | transcript_product=tetratricopeptide repeat-containing protein | location=TGGT1_chrXII:3025928-3029976(+) | protein_length=887 | sequence_SO=chromosome | SO=protein_coding_gene | is_pseudo=false	[K].ETNDDAKGTEEDAPEQR.[G]	1xTMTpro [K7]; 1xTMTpro [N-Term]; 1xPhospho [T9(100)]	TGGT1_247000-t26_1-p1 1xPhospho [T652(100)]	3	High	2.26411e-05	9.56086e-05	1	1	TGGT1_247000-t26_1-p1	TGGT1_247000-t26_1-p1 [644-660]	1	2593.19	1.022	0.03	1	26.8	26.2	11.67	2.94	NA	NA	24.6	29.1	NA	NA	25.6	26.7		High	7.761e-05	1.075e-05	4.29
52491	TGGT1_318710	ATP-binding cassette sub-family F member 1	transcript=TGGT1_318710-t26_1 | gene=TGGT1_318710 | organism=Toxoplasma_gondii_GT1 | gene_product=ATP-binding cassette sub-family F member 1 [Source:UniProtKB/TrEMBL;Acc:A0A125YVQ3] | transcript_product=ATP-binding cassette sub-family F member 1 | location=TGGT1_chrIV:1070737-1079983(+) | protein_length=811 | sequence_SO=chromosome | SO=protein_coding_gene | is_pseudo=false	[R].KSDEESEGAAEDAETDDAEPTAGASPSEK.[A]	2xTMTpro [K1; K29]; 1xTMTpro [N-Term]; 1xPhospho [T15(100)]	TGGT1_318710-t26_1-p1 1xPhospho [T573(100)]	11	High	7.89926e-11	9.56086e-05	1	1	TGGT1_318710-t26_1-p1	TGGT1_318710-t26_1-p1 [559-587]	1	3915.8	1.073	0.1	1	32.2	30	16.31	2.74	NA	NA	28.7	36.2	NA	NA	30.6	29.5		High	7.761e-05	1.397e-11	7.29
91529	TGGT1_220900	hypothetical protein	transcript=TGGT1_220900-t26_1 | gene=TGGT1_220900 | organism=Toxoplasma_gondii_GT1 | gene_product=hypothetical protein | transcript_product=hypothetical protein | location=TGGT1_chrII:27409-29529(+) | protein_length=706 | sequence_SO=chromosome | SO=protein_coding_gene | is_pseudo=false	[K].SPAADEESSTK.[R]	1xTMTpro [K11]; 1xTMTpro [N-Term]; 1xPhospho [S1(100)]	TGGT1_220900-t26_1-p1 1xPhospho [S315(100)]	10	High	2.34326e-05	9.56086e-05	1	1	TGGT1_220900-t26_1-p1	TGGT1_220900-t26_1-p1 [315-325]	0	1809.88	1.221	0.29	1	101.9	83.5	88.26	85.3	255.6	286.7	40.6	33	209.7	204.3	34.1	28.2		High	0.0001044	1.391e-05	4.88
91530	TGGT1_220900	hypothetical protein	transcript=TGGT1_220900-t26_1 | gene=TGGT1_220900 | organism=Toxoplasma_gondii_GT1 | gene_product=hypothetical protein | transcript_product=hypothetical protein | location=TGGT1_chrII:27409-29529(+) | protein_length=706 | sequence_SO=chromosome | SO=protein_coding_gene | is_pseudo=false	[K].SPAADEESSTKR.[F]	1xTMTpro [K11]; 1xTMTpro [N-Term]; 1xPhospho [S9(99.7)]	TGGT1_220900-t26_1-p1 1xPhospho [S323(99.7)]	8	High	2.49755e-05	9.56086e-05	1	1	TGGT1_220900-t26_1-p1	TGGT1_220900-t26_1-p1 [315-326]	1	1965.98	0.892	-0.16	1	251.4	281.8	22.34	17.43	279	346.4	216.2	226.5	300.1	345.3	264.6	229.2		High	7.761e-05	1.195e-05	4.27
[truncated: 18,094 more rows]

## Sheet: 4.2_PKA_R_phospho
Peptide_ID	Protein_ID	Description	Annotation	Sequence	Peptide_Modifications	Protein_Modifications	PSMs	Checked	Confidence	Qvality.PEP	Qvality.q.value	Number.of.Protein.Groups	Number.of.Proteins	Master.Protein.Accessions	Positions.in.Master.Proteins	Number.of.Missed.Cleavages	Theo.MHplus.in.Da	Abundance.Ratio.IAA.0..PBS.0	Abundance.Ratio.log2.IAA.0..PBS.0	Abundance.Ratio.Adj.P.Value.IAA.0..PBS.0	Abundances.Grouped.IAA.0	Abundances.Grouped.PBS.0	Abundances.Grouped.CV.in.Percent.IAA.0	Abundances.Grouped.CV.in.Percent.PBS.0	Abundances.Normalized.F3.126.Sample.IAA.0.R1	Abundances.Normalized.F3.127C.Sample.IAA.0.R2	Abundances.Normalized.F3.127N.Sample.PBS.0.R1	Abundances.Normalized.F3.128N.Sample.PBS.0.R2	Quan.Info	Percolator.q.Value.by.Search.Engine.Sequest.HT	Percolator.PEP.by.Search.Engine.Sequest.HT	XCorr.by.Search.Engine.Sequest.HT
[truncated: 9,349 more rows]

[truncated: 1 more sheets: 4.3_joined_ratios]
